# Supplementary material for: Efficacy and safety of transcutaneous electrical nerve stimulation (TENS) for acute and chronic pain in adults: a systematic review and meta-analysis of 381 studies (the meta-TENS study)
Source: PubMed Central journal article supplement — BMJ Open. 2022 Feb 10;12(2):e051073. doi: 10.1136/bmjopen-2021-051073 (PMC8845179; doi:10.1136/bmjopen-2021-051073), 2022-02-10
Supplement: bmjopen-2021-051073.draft_revisions.pdf [file bmjopen-2021-051073.draft_revisions.pdf]

# BMJ Open

BMJ Open is committed to open peer review. As part of this commitment we make the peer review history of every article we publish publicly available.

When an article is published we post the peer reviewers' comments and the authors' responses online. We also post the versions of the paper that were used during peer review. These are the versions that the peer review comments apply to.

The versions of the paper that follow are the versions that were submitted during the peer review process. They are not the versions of record or the final published versions. They should not be cited or distributed as the published version of this manuscript.

BMJ Open is an open access journal and the full, final, typeset and author-corrected version of record of the manuscript is available on our site with no access controls, subscription charges or pay-per-view fees (<http://bmjopen.bmj.com>).

If you have any questions on BMJ Open's open peer review process please email [info.bmjopen@bmj.com](mailto:info.bmjopen@bmj.com)

# BMJ Open

## Efficacy and Safety of Transcutaneous Electrical Nerve Stimulation (TENS) for Acute and Chronic Pain: A systematic review and meta-analysis (Meta-TENS study)

|                               |                                                                                                                                                                                                                                                                                                                                                                                                                                                                               |
|-------------------------------|-------------------------------------------------------------------------------------------------------------------------------------------------------------------------------------------------------------------------------------------------------------------------------------------------------------------------------------------------------------------------------------------------------------------------------------------------------------------------------|
| Journal:                      | <i>BMJ Open</i>                                                                                                                                                                                                                                                                                                                                                                                                                                                               |
| Manuscript ID                 | bmjopen-2021-051073                                                                                                                                                                                                                                                                                                                                                                                                                                                           |
| Article Type:                 | Original research                                                                                                                                                                                                                                                                                                                                                                                                                                                             |
| Date Submitted by the Author: | 10-Mar-2021                                                                                                                                                                                                                                                                                                                                                                                                                                                                   |
| Complete List of Authors:     | Johnson, Mark; Leeds Beckett University, Centre for Pain Research<br>Paley, C; Leeds Beckett University, Centre for Pain Research; Airedale NHS Foundation Trust, Research & Development<br>Jones, Gareth; Leeds Beckett University, Centre for Pain Research<br>Mulvey, Matthew; University of Leeds, Leeds Institute of Health Sciences<br>Wittkopf, Priscilla; Leeds Beckett University, Centre for Pain Research; Aalborg University, Center for Neuroplasticity and Pain |
| Keywords:                     | COMPLEMENTARY MEDICINE, PAIN MANAGEMENT, REHABILITATION MEDICINE                                                                                                                                                                                                                                                                                                                                                                                                              |
|                               |                                                                                                                                                                                                                                                                                                                                                                                                                                                                               |

SCHOLARONE™  
Manuscripts

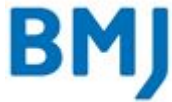

I, the Submitting Author has the right to grant and does grant on behalf of all authors of the Work (as defined in the below author licence), an exclusive licence and/or a non-exclusive licence for contributions from authors who are: i) UK Crown employees; ii) where BMJ has agreed a CC-BY licence shall apply, and/or iii) in accordance with the terms applicable for US Federal Government officers or employees acting as part of their official duties; on a worldwide, perpetual, irrevocable, royalty-free basis to BMJ Publishing Group Ltd ("BMJ") its licensees and where the relevant Journal is co-owned by BMJ to the co-owners of the Journal, to publish the Work in this journal and any other BMJ products and to exploit all rights, as set out in our [licence](#).

The Submitting Author accepts and understands that any supply made under these terms is made by BMJ to the Submitting Author unless you are acting as an employee on behalf of your employer or a postgraduate student of an affiliated institution which is paying any applicable article publishing charge ("APC") for Open Access articles. Where the Submitting Author wishes to make the Work available on an Open Access basis (and intends to pay the relevant APC), the terms of reuse of such Open Access shall be governed by a Creative Commons licence – details of these licences and which [Creative Commons](#) licence will apply to this Work are set out in our licence referred to above.

Other than as permitted in any relevant BMJ Author's Self Archiving Policies, I confirm this Work has not been accepted for publication elsewhere, is not being considered for publication elsewhere and does not duplicate material already published. I confirm all authors consent to publication of this Work and authorise the granting of this licence.

1  
2  
3 Efficacy and Safety of Transcutaneous Electrical Nerve Stimulation (TENS) for Acute and Chronic Pain: A  
4 systematic review and meta-analysis (Meta-TENS study)  
5  
6

7 Investigating Team

8 Mark I. Johnson, PhD1

9 Carole A. Paley, PhD1,2

10 Gareth Jones, PhD1

11 Matthew R. Mulvey, PhD 3

12 Priscilla G. Wittkopf, PhD 1,4  
13  
14

15 Affiliations

16 1. Centre for Pain Research, School of Clinical and Applied Sciences, Leeds Beckett University, Leeds, U.K.

17 2. Research & Development Dept. Airedale NHS Foundation Trust, Steeton, Keighley, U.K.

18 3. Academic Unit of Primary and Palliative Care, Leeds Institute of Health Sciences, University of Leeds, Leeds  
19 U.K.

20 4. Center for Neuroplasticity and Pain, Dept. of Health Science and Technology, Aalborg University, Aalborg,  
21 Denmark.  
22

23 Corresponding Author

24 Professor Mark I Johnson, PhD

25 Professor of Pain and Analgesia

26 Director of the Centre for Pain Research

27 School of Clinical and Applied Sciences

28 Portland Building

29 Leeds Beckett University

30 Leeds, U.K.

31 +441138123083

32 e-mail: [m.johnson@leedsbeckett.ac.uk](mailto:m.johnson@leedsbeckett.ac.uk)  
33

34 **ORCID iDs**

35 Professor Mark I Johnson [http:// orcid. org/ 0000- 0002- 9421- 9622](http://orcid.org/0000-0002-9421-9622)

36 Dr Carole A Paley [http://orcid.org/ 0000-0002-6335-2666](http://orcid.org/0000-0002-6335-2666)

37 Dr Gareth Jones <https://orcid.org/0000-0002-0313-0092>

38 Dr Mathew R. Mulvey <https://orcid.org/0000-0002-6357-3848>

39 Dr Priscilla G Wittkopf <http:// orcid. org/ 0000-0002-2957-6156>  
40  
41  
42  
43  
44  
45  
46  
47  
48  
49  
50  
51  
52  
53  
54  
55  
56  
57  
58  
59  
60



## ABSTRACT

### Objective

To investigate the efficacy and safety of transcutaneous electrical nerve stimulation (TENS) for relief of pain.

### Design

Systematic review and meta-analysis.

### Data Sources

Medline, Cochrane Central, Embase (and others) from inception to July 2019 and updated on 17 May 2020.

### Eligibility criteria for study selection

Randomised controlled trials (RCTs) comparing strong non-painful TENS at or close to the site of pain versus placebo or other treatments in adults with any type of pain.

### Data extraction and synthesis

Reviewers independently screened, extracted data, and assessed risk of bias (RoB, Cochrane tool), and certainty of evidence (GRADE). Mean pain intensity and proportions of participants achieving relief of pain ( $\geq 30\%$  or  $\geq 50\%$ ) during or immediately after TENS. Random effects models were used to calculate standardised mean differences (SMD) and risk ratios (RR). Subgroup analyses were related to trial methodology and type of pain.

### Results

The review included 381 RCTs (24532 participants). Pain intensity was lower during or immediately after TENS compared with placebo (91 RCTs, 92 samples,  $n = 4841$ ,  $SMD = -0.96$  [95% CI,  $-1.14, -0.78$ ]). Methodological (e.g. RoB, sample size) and pain characteristics (e.g. acute vs chronic, diagnosis) did not modify the effect. Pain intensity was lower during or immediately after TENS compared with pharmacological and non-pharmacological treatments used as part of standard of care (61 RCTs, 61 samples,  $n = 3155$ ,  $SMD = -0.72$  [95% CI,  $-0.95, -0.50$ ]). Levels of evidence were downgraded because of small sized trials contributing to imprecision in magnitude estimates. Data was limited for other outcomes including adverse events which were poorly reported, generally mild, and not different to comparators.

### Conclusion

There was moderate-certainty evidence that pain intensity is lower during or immediately after TENS compared with placebo, irrespective of the type of pain and without serious adverse events.

### Systematic review registration

PROSPERO - CRD42019125054

### Keywords

Transcutaneous electrical nerve stimulation (TENS), Pain management, Therapeutic neuromodulation, Meta-analysis

### Strengths and limitations of this study

- This meta-analysis is the first to pool data from all types of pain and to meet threshold standards for pooling pain data for meta-analysis (i.e.  $\geq 500$  participants per trial arm)
- Effect sizes were calculated during or immediately after strong non-painful TENS because this is ecologically valid and overcomes problems of analysing data gathered from a wide variety of TENS regimens, such as prn, where participants are using TENS intermittently
- There was a preponderance of small sample sized studies so a judicious approach was taken in interpretation of findings
- Sub-group analyses were used to explore statistical heterogeneity and the effect of combining different types of pain; the trim and fill method was used to explore publication bias
- GRADE criteria were used to judge the impact of risk of bias, imprecision, inconsistency, indirectness and publication bias on the certainty of effect size estimates

## BACKGROUND

Pain is a global health problem with negative consequences for patients, society and health care systems<sup>1,2</sup>. Transcutaneous electrical nerve stimulation (TENS) is used for symptomatic relief of pain supported by physiological evidence that TENS inhibits the activity and excitability of central nociceptive transmission neurons (for review see<sup>3</sup>).

Clinicians and policy makers are confused about the benefits and harm associated with TENS and whether they should or should not offer TENS to their patients because of inconsistency in clinical practice guidelines. For example, in 2020, the National Institute of Health and Care Excellence (NICE) in the U.K. released draft guidance for the management of chronic pain that recommends not to offer TENS [GID-NG10069]<sup>4</sup>. The NICE does not recommend TENS for intrapartum care<sup>5</sup> or non-specific chronic low back pain<sup>6</sup> but does recommend TENS as an adjunct for osteoarthritis<sup>7</sup> and rheumatoid arthritis<sup>8</sup>. The situation is similar in other parts of the world. Uncertainty about efficacy resulted in the Centers for Medicare & Medicaid Services in the USA restricting coverage for the use of TENS treatment for chronic lower back pain to individuals enrolled in an approved clinical study. Equipment, running costs and follow-up clinical support for TENS is inexpensive. Treatment can be self-administered without fear of toxicity, potentially offering symptomatic relief of pain throughout the day.

The debate about the efficacy of TENS has been ongoing since it entered mainstream medicine in the 1970s. There are over 100 systematic reviews, including Cochrane reviews, on TENS and many are inconclusive<sup>9</sup>. An overview of eight Cochrane reviews (51 RCTs, 2895 participants) on TENS for chronic pain was inconclusive with reviewers reluctant to meta-analyse data due to methodological and clinical heterogeneity<sup>10</sup>. Meta-analyses of TENS for specific pain conditions are criticised for insufficient pooled data. As research suggests no relationship between TENS outcome and pain diagnosis<sup>11</sup>, amalgamating pain conditions would increase the amount of pooled data for meta-analysis. To date, there has been no attempt to meta-analyse data from all available RCTs irrespective of the type of pain, possibly because of the enormity of the task. Such a meta-analysis would resolve whether strong non-painful TENS administered to painful body parts reduced the intensity of pain.

The aim of our meta-analysis was to evaluate the efficacy and safety of TENS for all types of pain in adults. Concerns of heterogeneity associated with combining pain conditions was offset by subgroup analyses based on pain diagnosis.

## METHODS

This systematic review and meta-analysis were conducted in accordance with guidelines from the Preferred Reporting Items for Systematic Review and Meta-analysis (PRISMA); Cochrane Collaboration of Systematic Reviews; and Grading and Recommendations, Assessment, Development and Evaluation (GRADE). The study was registered on PROSPERO (CRD42019125054) and the protocol published (<https://bmjopen.bmj.com/content/9/10/e029999>). Ethical approval for the review was granted by Leeds Beckett University (Application Ref: 78097). See supplementary file 1 for full details of search strategy, eligibility screening, data extraction, and analysis.

### Search strategy and selection criteria

One reviewer (PGW) searched electronic databases (Medline, Embase, Cochrane Central, CINAHL, PsycINFO, LILACS, PEDRO, Web of Science, AMED, SPORTDiscus) from inception to July 2019 and updated on 17 May 2020, for full text publications of randomised controlled trials (RCTs) and for systematic reviews that evaluated TENS for adults with clinical pain versus:

- placebo (e.g. sham (no current) TENS device);
- no treatment or waiting list control;
- standard of care; and
- other treatment, both pharmacological and non-pharmacological.

There were no language restrictions and articles were translated where possible.

### Types of TENS interventions

The TENS intervention was defined as pulsed electrical currents generated by a 'standard TENS device' administered across the intact surface of the skin using surface electrodes at the site of pain or over nerve bundles proximal (or near) to the site of pain, with the intention of stimulating peripheral nerves to alleviate pain<sup>3</sup>. We included any type of pulse pattern and excluded pulse frequencies >250 pulses per second (pps), pulse durations >500 microseconds ( $\mu$ s) and peak-to-peak amplitudes >60 milliamperes (mA).

We included TENS administered by a therapist and/or participant; as a sole treatment or in combination with other treatments, for any duration or regularity of treatment; as a single or multiple treatment intervention with or without follow-up. We considered participant-reported strong but comfortable TENS sensations as optimal and used this as our primary TENS comparison group. We excluded RCTs evaluating non-painful outcomes (e.g. bladder dysfunction, constipation, dementia), or administering TENS at acupuncture points (unless over nerve bundles at the site of pain), using probes or electrode arrays, or using TENS-like currents (e.g. interferential current, microcurrent).

Two review authors (PGW and MIJ) independently screened titles, abstracts, and full texts, and extracted trial characteristics and numerical data. Disagreements were resolved by consensus with a third review author as arbiter (CAP or GJ). Records were not anonymised before assessment. Reasons for exclusion were coded and tabulated. The characteristics of included trials were extracted and tabulated including design, sample population, TENS intervention, comparator(s) and outcome measures. Decisions, trial characteristics and codes for analyses were documented in Excel spreadsheets.

### Types of outcome measures

Pain outcomes were mean (continuous data) patient-reported intensity of spontaneous or evoked pain (at rest or on movement) using standard subjective scales (e.g. numerical rating scale (NRS) or visual analogue scale (VAS)), and the proportion of participants reporting a reduction in pain intensity of  $\geq 30\%$  (moderate) or  $\geq 50\%$  (substantial) relative to baseline<sup>12</sup>. A between-group difference of  $\geq 10$  mm on a 100 mm VAS was set as the threshold for clinical importance in-line with IMMPACT criteria<sup>13</sup>. We prioritised measurements at the last during TENS timepoint (i.e. whilst TENS switched on) or the first timepoint immediately after TENS had been switched off. If TENS was administered as a course of treatments, we prioritised the last treatment session. We analysed the proportion of participants experiencing an adverse event, irrespective of severity. We only extracted data as 'zero' when the RCT report included numerical data for the presence of at least one adverse event in one of the trial arms and clearly stated that no adverse events had occurred in the other trial arm(s).

### Data analysis

Meta-analyses were conducted using Review Manager 5.3 and Stata 16 software. We calculated standardised mean difference (SMD) for continuous data and risk ratio (RR) for dichotomous data. Pre-specified criteria were used to select the primary TENS comparison and we did not enter several interventions into the same meta-analysis to avoid 'double-counting' and unit-of-analysis errors. We used an intention-to-treat analysis and combined data from first and second periods in cross-over trials because there was sufficient washout between interventions to eliminate contamination. Data was considered imprecise if the TENS treatment arm was below 200 participants in single RCTs, or below 500 participants for pooled data<sup>14</sup>.

Two review authors (CAP and MIJ) independently assessed risk of bias (RoB) using the Cochrane tool. We examined heterogeneity using visual inspection of forest plots, the  $I^2$  statistic, the Chi<sup>2</sup> test and the Cochrane Collaboration's rough guide to interpretation. Small study effects were analysed using Egger's regression test (p-value set at  $\leq 0.1$ ), and the Trim and Fill method was used to analyse potential publication bias. Pre-specified subgroup analyses were related to trial methodology and type of pain. We interpreted subgroup analyses by considering: a p-value of  $\leq 0.1$  to indicate a statistically significant subgroup effect (interaction); the direction of each subgroup effect (i.e. qualitative or quantitative); and the extent to which individual trials differed in treatment effects within each subgroup (i.e. heterogeneity), in-line with Richardson et al.<sup>15</sup>. We evaluated the certainty of evidence using the GRADE system (GRADEpro GDT 2015, <https://gradepro.org/>).

### Patient and public involvement

There was no patient or public involvement in any aspect of this study or its write-up.

## RESULTS

Our searches yielded 7679 records (Figure 1). After removal of duplicates we screened 5747 records and reviewed 623 full text reports of which 381 RCTs were included (383 samples, 24532 participants, 334 parallel-group, see supplementary file 2 for characteristics of included studies) and 19 RCTs are awaiting classification (supplementary file 3 for studies awaiting classification). Violations of pre-specified criteria for TENS were the most common reasons for excluding studies (supplementary file 4 for reasons for excluding studies). See supplementary file 1 for full details of screening, extraction, main and subgroup analyses, and interpretation, including risk of bias and GRADE judgements.

1  
2  
3 Included trials consist of 176 samples with chronic pain (osteoarthritis = 32 samples), 162 samples with acute  
4 pain (post-operative pain = 95 samples), 10 samples mixed and 35 samples unclear. There were 26 trials with  
5 overall low RoB (Figure 2). Small sample size was an issue with 341 trials having fewer than 50 participants in  
6 the TENS group (mean  $\pm$  SD TENS group = 27.71  $\pm$  21.89 participants; 13 RCTs had  $\geq$ 100 participants in the  
7 TENS group). There were at least 216 TENS interventions where participants had access to other treatments,  
8 most commonly medication or exercise as part of ongoing SoC, as a combination treatment or as rescue  
9 analgesia. Often, monitoring and/or reporting of concurrent treatment(s) was deficient.

10  
11 There were 352 of 381 RCTs that gathered continuous data for pain intensity and 164 RCTs had extractable data  
12 for meta-analysis. Figure 3 summarises overall effect sizes for treatment comparisons with at least 100 pooled  
13 data points per arm and Figure 4 summarises subgroup analyses for types of pain. There was insufficient  
14 extractable data to conduct responder analyses of participants reporting a  $\geq$ 30% or  $\geq$ 50% pain reduction unless  
15 otherwise stated.

#### 16 TENS versus Placebo

17 We extracted mean (continuous) data from 91 of 202 RCTs comparing TENS with placebo. There was a  
18 significant overall effect in favour of TENS and substantial statistical heterogeneity (TENS = 2426 participants,  
19 placebo = 2415 participants, SMD = -0.96 [95% CI -1.14, -0.78],  $I^2 = 88\%$ ). Subgroup analyses found that the  
20 effect of TENS was not modified by methodological variables including RoB, sample size (Figure 3 and  
21 supplementary file 5), or by type of pain (Figure 4 and supplementary file 6). The validity of the treatment effect  
22 estimate for subgroups were uncertain as individual trial results are inconsistent. Egger's regression test showed  
23 significant evidence of a small-study effect ( $p < 0.0001$ ). Trim and fill analysis showed evidence of publication  
24 bias, indicating that eight trials might be missing to the right of the mean for an adjusted SMD of -0.78 (95% CI  
25 -0.995 to -0.565). We downgraded to moderate-certainty evidence.

26  
27 We extracted dichotomous data from nine RCTs and found a statistically significant difference in the proportion  
28 of participants reporting a reduction of pain intensity  $\geq$ 50% in favour of TENS (TENS = 106/241 responders,  
29 placebo 28/219 responders, RR = 2.89 [2.02, 4.13],  $p < 0.00001$ ,  $I^2 = 0\%$ ). There were too few RCTs and  
30 participants to be entirely certain of the validity of the treatment effect estimate. We downgraded to low-  
31 certainty evidence.

#### 32 TENS versus No Treatment

33 We extracted mean (continuous) data from 10 of 16 RCTs (602 participants) comparing TENS with a no  
34 treatment control. There was a statistically significant difference in favour of TENS and substantial statistical  
35 heterogeneity (TENS = 298 participants, no treatment = 304 participants, SMD = -0.82 [95% CI -1.18, -0.46],  $I^2$   
36 = 76%) (Figure 3). There was insufficient data to undertake subgroup analyses to explore the effect of  
37 methodological nor clinical characteristics on outcome. Egger's regression test showed significant evidence of a  
38 small-study effect ( $p = 0.0878$ ). However, Trim and fill analysis showed no evidence of publication bias. We  
39 downgraded to low-certainty evidence.

#### 40 TENS versus treatment(s) used as part of standard or care

41 We extracted mean (continuous) data from 61 of 127 RCTs (3155 participants) comparing TENS with  
42 treatment(s) used as standard or care (in part or fully). There was a statistically significant difference in favour  
43 of TENS and substantial statistical heterogeneity (Figure 3). Subgroup analyses suggested that the nature of the  
44 SoC intervention did not modify the effect of TENS. Egger's regression test showed significant evidence of a  
45 small-study effect ( $p = 0.0062$ ). Trim and fill analysis showed evidence of publication bias, indicating that 11  
46 trials might be missing to left of mean for an adjusted SMD of -1.032 [95% -1.31, -0.76]. We downgraded to  
47 low certainty evidence due to small study effect.

48  
49 We extracted mean (continuous) data from 67 of 118 RCTs that compared TENS with at least one other  
50 treatment, not categorised by RCT authors as SoC (67 RCTs, 131 samples, 3327 participants). We chose not to  
51 report the meta-analysis due to the heterogeneous mix of comparators, the inclusion of duplicate data in the  
52 TENS arm, and sub-groups with too few comparisons. We did not GRADE this evidence.

#### 53 High versus low frequency TENS

54 We extracted mean (continuous) data from 13 of 37 RCTs (468 participants) that compared high with low  
55 frequency TENS and found no statistically significant difference (Figure 3). Egger's regression test showed no  
56 significant evidence of a small-study effect ( $p = 0.8871$ ). Trim and fill analysis showed no evidence of  
57 publication bias. We downgraded to moderate-certainty evidence of no difference.



### Safety

There were 136 reports that included a statement about adverse events (59/136 = no adverse events in all intervention groups, 90/136 = no adverse events related to TENS, see supplementary file 7 for characteristics of adverse events). Often statements were unclear. Adverse events associated with TENS were mild in severity, infrequent in occurrence and included skin irritation, tenderness/soreness and TENS discomfort. There were no reports of a serious adverse event directly attributable to TENS. We extracted dichotomous data from 18 RCTs (1587 participants) and found no statistically significant difference in the risk of an adverse event, irrespective of severity between TENS and comparators (RR = 0.73 [95% CI 0.36, 1.48],  $p = 0.38$ ,  $I^2 = 66\%$ ). The type of comparator did not modify the effect. We downgraded to very low certainty evidence because of spontaneous detection adverse events based on ill-defined criteria.

All studies met our pre-specified criteria for TENS, although unclear reporting hindered characterisation of specific aspects of TENS technique. We categorised 276 interventions as high frequency TENS (100Hz = 109 interventions) and 35 interventions as low frequency TENS. Participants in some RCTs were instructed to adjust the pulse frequency of TENS as needed. TENS interventions varied considerably; supervised (therapist) or unsupervised (self-administered); prescribed or pro re nata (prn); single or multiple treatments; short treatment duration <1 minute for procedural pain or up to 2 years 'as required' for chronic pain.

## DISCUSSION

### Statement of principal findings

Our systematic review of 381 RCTs (24532 participants) is the most comprehensive to date. Our meta-analysis of 91 RCTs (4841 participants) found that pain intensity was lower during or immediately after a treatment of strong non-painful TENS administered to painful body parts compared with placebo. Our analysis has been conducted in a logical, systematic and rigorous manner and we have been diligent and judicious when interpreting the analysis. Risk of bias or trials with fewer than 50 participants per arm did not modify the effect of TENS, allaying concerns that small study size undermines the veracity of conclusions<sup>16</sup>. Types of pain did not modify the effect of TENS compared with placebo. Inconsistency in individual trial results generated uncertainty in the magnitude of effect estimates for different types of pain but this was quantitative in nature (i.e. in the same direction and always in favour of TENS). Thus, we are confident that pain intensity is less during or immediately after TENS treatment when compared with placebo and that there is moderate certainty evidence in the magnitude of the effect estimate.

There was low certainty evidence that more participants report at least 50% reduction in pain during or immediately after TENS than placebo. There was low certainty evidence that TENS added to, or compared with, exercise/physiotherapy or analgesic medications used as part of standard/routine care (61 RCTs, 3155 participants). Adverse events were minor with no serious adverse events reported in 381 RCTs but only very low certainty evidence that the risk ratio of an adverse event, irrespective of severity, is no different to placebo.

### Strengths of the study

Our meta-analysis provides estimates of effect size during or immediately after treatment and our GRADE judgements account for shortcomings in RCT data. In clinical practice, TENS is used to produce a pleasant sensation to override pain in the moment, i.e. optimal effects occur whilst experiencing a TENS sensation. This is similar to other neuromodulation techniques including warming, cooling and rubbing of the skin. Hence, our analysis during TENS effects is ecologically valid and also overcomes problems of analysing data gathered from a wide variety of TENS regimens, such as prn, where participants are using TENS intermittently. We plan to undertake an analysis of long-term outcome in the future, although this is likely to be inexact due to variability in TENS treatment schedules and of measurement timepoints, contamination by concomitant treatment(s), and a lack of extractable data.

### Weaknesses of the study

An overview of Cochrane reviews on TENS for chronic pain did not pool data from small sized trials because of concern about imprecision<sup>10,17</sup>. We found evidence of a small-study effect and publication bias, although the adjusted SMD using the trim and fill method did not alter the effect size estimate for TENS versus placebo. Our meta-analyses exposed statistical heterogeneity likely to contribute to imprecision, although our pre-specified thresholds for pooling data were met (i.e.  $\geq 500$  participants per trial arm). Unclear reporting contributed to unclear risk of bias with few reports referring to standards for design and reporting of TENS trials<sup>18</sup>.

In placebo comparisons, blinding of participants was achieved using a sham TENS device (without current) and pre-study briefings to create uncertainty about which intervention was functioning properly. This has been shown to be a valid method of reducing performance bias, although few of the included studies measured

blinding success<sup>19</sup>. Contamination of effect size estimates by concurrent treatment was an issue<sup>20</sup>. We decided not to use generic inverse variance to correct for paired data associated with crossover trial data because of sufficient washout periods and an overwhelming number of parallel group data points.

Most investigators reported spontaneous detection of adverse events based on ill-defined criteria, so our estimate of risk ratio lacked precision. Inadequate adverse event reporting remains a concern in RCTs of non-pharmacological interventions for pain<sup>21</sup>.

Judgements of the impact of risk of bias, imprecision, inconsistency, indirectness and publication bias resulted in downgrading the certainty of all effect size estimates according to GRADE criteria (details provided in the supplementary file 1).

### Strengths and weaknesses in relation to other studies

Previous systematic reviews and meta-analyses, including Cochrane reviews are inconsistent and/or inconclusive (for review see<sup>3</sup>). The 2020 NICE draft guidelines for chronic pain did not recommend TENS and based on an analysis of two RCTs categorised as chronic *primary* pain<sup>4</sup>. The 2019, overview of Cochrane reviews on TENS for chronic pain was inconclusive based on a descriptive synthesis of 51 RCTs<sup>10,17</sup>. For chronic pain we extracted data from 31 RCTs and found a statistically significant overall effect in favour of TENS compared with placebo (TENS = 721 participants, placebo = 696 participants, SMD = -0.87 [95% CI -1.19, -0.55],  $p < 0.00001$ ,  $I^2 = 86\%$ ). Nonetheless, type of pain did not moderate the effect of TENS and we hope that this will be considered by future guideline panels.

The findings of our meta-analysis are consistent with clinical experience and physiological plausibility. Since its inception over 50 years ago, clinical experience and expert opinion has remained resolute that TENS provides immediate short-term relief of pain by therapeutic neuromodulation in a manner akin to rubbing the skin (for review see<sup>3</sup>). Physiological evidence validates a short-lasting during-stimulation effect, demonstrating that selective activation of low threshold somatosensory peripheral afferents during TENS reduces activity and excitability of central nociceptive transmission cells in normal<sup>22</sup> and sensitised states<sup>23</sup>. Different frequencies of pulsed current influences central neuropharmacological actions in animal studies<sup>24</sup>, but clinical research has failed to find relationships between electrical characteristics, type of pain and TENS outcome<sup>11</sup>. Our finding that adverse events were minor and mostly erythema and itchiness at the site of electrodes is consistent with evaluations of safety by professional bodies<sup>25</sup>.

### Meaning of the study

At present, clinicians advise patients to self-administer TENS on its own or in combination with other treatments by producing a strong non-painful TENS sensation within or close to the site of pain. Patients are advised to administer TENS frequently to maintain analgesia. Clinicians should be aware that the effects of TENS are not modified by the characteristics of pain, so any type of pain may respond, or by the frequency of currents, providing a strong non-painful TENS sensation is generated within or close to the site of pain. Guideline panels and policy makers should be aware that TENS is efficacious as an adjunct to core treatment and for any type of pain and/or setting i.e. our analysis included TENS administered in hospital, clinic or home (community) settings.

### Unanswered questions and future research

Our findings justify the need for pragmatic ecologically valid studies gathering real-world data about how best to integrate TENS into practice. Recently, a 30-minute TENS treatment was shown to predict longer-term outcome in women with fibromyalgia<sup>26</sup> and real world data can be used to develop educational packages to train and support patients to optimise TENS treatment within a self-care model of pain management<sup>27,28</sup>. We did not undertake a cost-benefit analysis, although previous analyses provide evidence that TENS equipment, running costs and follow-up clinical support is inexpensive and can reduce annual costs for chronic low back pain and knee osteoarthritis<sup>29,30</sup>.

We hope our findings discourage publication of small sized RCTs on TENS trials. The need for large, multicentred RCTs remains, although we suspect that the effect size estimate from such a trial will be close to that found in our review. We recommend an enriched enrolment randomised withdrawal design with trial arm sample sizes greater than 200 participants to overcome methodological issues<sup>3,18</sup>. We hope our findings discourage publication systematic reviews until such large RCTs become available.

### Conclusions

1  
2  
3 This meta-analysis resolves long-term uncertainty about the efficacy of TENS by providing moderate-certainty  
4 evidence that strong non-painful TENS within or close to the site of pain, produces clinically important  
5 reductions in the intensity of acute or chronic pain during or immediately after treatment. Adverse events  
6 associated with TENS included skin irritation with no reports of serious adverse events. Clinicians, policy  
7 makers and funders should consider TENS as adjunct to core treatment for immediate-short-term relief any type  
8 of pain.  
9  
10  
11  
12  
13  
14  
15  
16  
17  
18  
19  
20  
21  
22  
23  
24  
25  
26  
27  
28  
29  
30  
31  
32  
33  
34  
35  
36  
37  
38  
39  
40  
41  
42  
43  
44  
45  
46  
47  
48  
49  
50  
51  
52  
53  
54  
55  
56  
57  
58  
59  
60

For peer review only

### Author contributions

Based on CRediT (Contributor Roles Taxonomy) <http://credit.niso.org/>

- Conceptualization: MIJ
- Data curation: MIJ, PGW, CAP (GJ cross checking)
- Formal Analysis: MIJ, PGW, CAP, MRM, GJ
- Funding acquisition: MIJ
- Investigation: MIJ, PGW, CAP, MRM, GJ
  - Development and delivery of search strategy: PGW, MIJ
  - Screening for eligibility: PGW, MIJ (CAP and GJ as arbiters)
  - Data extraction: MIJ, PGW, (CAP, GJ cross checking)
  - Assessment of risk of bias: MIJ, CAP, (PGW as arbiter)
  - Assessment of adverse events: MIJ, CAP, PGW
  - Assessment of effects of interventions: MIJ, PGW, CAP (GJ and MRM arbiters)
  - Assessment of publication bias: MRM, PGW, MIJ
  - GRADE assessment against criteria: MIJ, CAP (PGW, GJ as arbiters)
  - Overall GRADE judgement: MIJ, CAP, PGW, MRM, GJ
  - Interpreting the results: MIJ, PGW, CAP, MRM, GJ
- Methodology (Protocol development): MIJ, PGW, CAP, GJ
- Project administration: MIJ
- Resources: MIJ
- Software: MIJ, MRM
- Supervision: MIJ
- Validation: MIJ
- Visualization: MIJ
- Writing – original draft: MIJ
- Writing – review & editing: MIJ, PGW, CAP, GJ, MRM

All authors had access to the data and took responsibility for the integrity of the data and the accuracy of the data analysis. All authors approved the final version of the review.

Data sharing: Extracted data is available on request from Prof. Mark I. Johnson

Transparency declaration: I (Prof. Mark I. Johnson) affirm that the manuscript is an honest, accurate, and transparent account of the study being reported; that no important aspects of the study have been omitted; and that any discrepancies from the study as planned (and, if relevant, registered) have been explained.

Funding: The review was funded by an Investigator Sponsored Study grant from GlaxoSmithKline (award/grant number N/A). The funder had no role in study design, data collection, data interpretation, data analysis, or writing of the report. The corresponding author had full access to all the data in the study and had final responsibility for the decision to submit for publication.

Competing interests: All authors have completed the ICMJE uniform disclosure form and declare the following:

Prof. Mark I. Johnson (taken from ICMJE form)

Dr. Johnson reports grants from GlaxoSmithKline, during the conduct of the study; other from GlaxoSmithKline, other from TENS Care, other from Actegy Ltd, personal fees from Oxford University Press, other from LifeCare Ltd, other from GlaxoSmithKline, other from Eurocept Pharmaceuticals, outside the submitted work; and I was involved in conducting the following studies that were considered for inclusion in the work submitted for publication

1. Dissanayaka TD, Pallegama RW, Suraweera HJ, Johnson MI, Kariyawasam AP. (2016). Comparison of the Effectiveness of Transcutaneous Electrical Nerve Stimulation and Interferential Therapy on the Upper Trapezius in Myofascial Pain Syndrome: A Randomized Controlled Study. *American Journal of Physical Medicine and Rehabilitation* 2016 Sep;95(9):663-72.
2. Palmer S, Domaille M, Cramp F, Walsh N, Pollock J, Kirwan J, Johnson MI. (2014) Transcutaneous Electrical Nerve Stimulation as an adjunct to education and exercise for knee osteoarthritis: a randomised controlled trial. *Arthritis Care & Research* 2014; 66(3), 387–394 – Funded by the Physiotherapy Research Foundation (part of the Chartered Society of Physiotherapy Charitable Trust) and Above & Beyond Charities.



3. Pallett EJ, Rentowl P, Johnson MI, Watson PJ (2014) Implementation fidelity of self-administered Transcutaneous Electrical Nerve Stimulation (TENS) in patients with chronic back pain: An observational study. *Clin J Pain*. 2014; Mar;30(3):224-31.
4. Kolen AF, de Nijs RN, Wagemakers FM, Meier AJ, Johnson MI (2012) The effects of spatially targeted transcutaneous electrical nerve stimulation (TENS) using an electrode array that measures skin resistance on pain and mobility in patients with osteoarthritis in the knee: A randomized controlled trial. *Pain*. 2012 Feb;153(2):373-81. – Funded by Phillips Research Europe

Drs Carole A. Paley, Gareth Jones, Mathew R. Mulvey and Priscilla G. Wittkopf declare no competing interests

Patient and public involvement: There was no patient or public involvement in any aspect of this study or its write-up.

Patient consent for publication: Not required.

Ethical approval: Leeds Beckett University Application Ref: 78097

Dissemination to participants and related patient and public communities: We plan to disseminate our findings to patient organisations and media outlets.

Acknowledgements: None

I, the Submitting Author has the right to grant and does grant on behalf of all authors of the Work (as defined in the author licence), an exclusive licence and/or a non-exclusive licence for contributions from authors who are: i) UK Crown employees; ii) where BMJ has agreed a CC-BY licence shall apply, and/or iii) in accordance with the terms applicable for US Federal Government officers or employees acting as part of their official duties; on a worldwide, perpetual, irrevocable, royalty-free basis to BMJ Publishing Group Ltd (“BMJ”) its licensees.

## REFERENCES

1. Global Burden of Disease Study. Global burden of 369 diseases and injuries in 204 countries and territories, 1990-2019: a systematic analysis for the Global Burden of Disease Study 2019. *Lancet* 2020; **396**(10258): 1204-22.
2. Pitcher MH, Von Korff M, Bushnell MC, Porter L. Prevalence and Profile of High-Impact Chronic Pain in the United States. *J Pain* 2019; **20**(2): 146-60.
3. Johnson MI. Transcutaneous electrical nerve stimulation. In: Watson T, Nussbaum EL, eds. *Electrophysical agents*. 13ed: Elsevier; 2020: 264-95.
4. National Institute for Health and Care Excellence. Chronic pain in over 16s: assessment and management. Draft for consultation, August 2020. Available at: <https://www.nice.org.uk/guidance/gid-ng10069/documents/draft-guideline> Accessed on 27 January 2021
5. National Institute for Health and Clinical Excellence. NICE clinical guideline 55 Intrapartum care: care of healthy women and their babies during childbirth. London, 2007.
6. National Institute for Health and Care Excellence N. Low back pain and sciatica in over 16s: assessment and management. Clinical guideline [NG59]. National Institute for Health and Care Excellence (NICE); 2016. p. 1-18.
7. National Institute for Health and Care Excellence. Osteoarthritis: care and management. NICE guidelines [CG177] London, 2014.
8. National Institute for Health and Clinical Excellence. NICE clinical guideline 79 Rheumatoid arthritis: The management of rheumatoid arthritis in adults. London, 2009.
9. Vance CG, Dailey DL, Rakel BA, Sluka KA. Using TENS for pain control: the state of the evidence. *Pain Manag* 2014; **4**(3): 197-209.
10. Gibson W, Wand BM, Meads C, Catley MJ, O'Connell NE. Transcutaneous electrical nerve stimulation (TENS) for chronic pain - an overview of Cochrane Reviews. *Cochrane Database Syst Rev* 2019; **2**: CD011890.
11. Johnson MI, Ashton CH, Thompson JW. An in-depth study of long-term users of transcutaneous electrical nerve stimulation (TENS). Implications for clinical use of TENS. *Pain* 1991; **44**(3): 221-9.
12. Moore RA, Derry S, Wiffen PJ. Challenges in design and interpretation of chronic pain trials. *Br J Anaesthesia* 2013; **111**(1): 38-45.
13. Dworkin RH, Turk DC, Wyrwich KW, et al. Interpreting the clinical importance of treatment outcomes in chronic pain clinical trials: IMMPACT recommendations. *J Pain* 2008; **9**(2): 105-21.

14. Moore RA, Gavaghan D, Tramer MR, Collins SL, McQuay HJ. Size is everything--large amounts of information are needed to overcome random effects in estimating direction and magnitude of treatment effects. *Pain* 1998; **78**(3): 209-16.
15. Richardson M, Garner P., Donegan, S. Interpretation of subgroup analyses in systematic reviews: A tutorial. *Clin Epidemiol Global Health* 2019; **7**: 192-8.
16. Dechartres A, Trinquart L, Boutron I, Ravaud P. Influence of trial sample size on treatment effect estimates: meta-epidemiological study. *BMJ* 2013; **346**: f2304.
17. Travers MJ, O'Connell NE, Tugwell P, Eccleston C, Gibson W. Transcutaneous electrical nerve stimulation (TENS) for chronic pain: the opportunity to begin again. *Cochrane Database Syst Rev* 2020 Apr 22;4:ED000139.
18. Bennett MI, Hughes N, Johnson MI. Methodological quality in randomised controlled trials of transcutaneous electric nerve stimulation for pain: Low fidelity may explain negative findings. *Pain* 2011; **152**(6): 1226-32.
19. Rakeb B, Cooper N, Adams HJ, et al. A new transient sham TENS device allows for investigator blinding while delivering a true placebo treatment. *J Pain* 2010; **11**(3): 230-8.
20. Grovle L, Hasvik E, Haugen AJ. Rescue and concomitant analgesics in placebo-controlled trials of pharmacotherapy for neuropathic pain and low back pain. *Pain* 2020; **161**(1): 3-10.
21. Hunsinger M, Smith SM, Rothstein D, et al. Adverse event reporting in nonpharmacologic, noninterventional pain clinical trials: ACTTION systematic review. *Pain* 2014; **155**(11): 2253-62.
22. Garrison DW, Foreman RD. Effects of transcutaneous electrical nerve stimulation (TENS) on spontaneous and noxiously evoked dorsal horn cell activity in cats with transected spinal cords. *Neuroscience letters* 1996; **216**(2): 125-8.
23. Ma Y, Sluka K. Reduction in inflammation-induced sensitization of dorsal horn neurons by transcutaneous electrical nerve stimulation in anesthetized rats. *Exper Brain Res* 2001; **137**(1): 94-102.
24. Sluka KA, Vance CG, Lisi TL. High-frequency, but not low-frequency, transcutaneous electrical nerve stimulation reduces aspartate and glutamate release in the spinal cord dorsal horn. *J Neurochem* 2005; **95**(6): 1794-801.
25. Houghton P, Nussbaum E, Hoens A. Electrophysical agents. Contraindications and Precautions: An Evidence-Based Approach to Clinical Decision Making in Physical Therapy. *Physiotherapy Canada* 2010; **62**(5): 5-80.
26. Vance CG, Zimmerman MB, Dailey DL, et al. Reduction in movement-evoked pain and fatigue during initial 30-minute TENS treatment predicts TENS responders in women with fibromyalgia. *Pain* 2020.
27. Gozani SN, Ferree TC, Moynihan M, Kong X. Impact of transcutaneous electrical nerve stimulation on sleep in chronic low back pain: a real-world retrospective cohort study. *Journal of Pain Research* 2019; **12**: 743-52.
28. Gladwell PW, Cramp F, Palmer S. Matching the perceived benefits of Transcutaneous Electrical Nerve Stimulation (TENS) for chronic musculoskeletal pain against Patient Reported Outcome Measures using the International Classification of Functioning, Disability and Health (ICF). *Physiotherapy* 2020; **106**: 128-35.
29. Pivec R, Minshall ME, Mistry JB, Chughtai M, Elmallah RK, Mont MA. Decreased Opioid Utilization and Cost at One Year in Chronic Low Back Pain Patients Treated with Transcutaneous Electric Nerve Stimulation (TENS). *Surg Technol Int* 2015; **27**: 268-74.
30. Woods B, Manca A, Weatherly H, et al. Cost-effectiveness of adjunct non-pharmacological interventions for osteoarthritis of the knee. *PloS One* 2017; **12**(3).

## FIGURE LEGENDS

### Figure 1

PRISMA Flow Chart

### Figure 2

Methodological quality graph: review authors' judgments about each methodological quality item presented as percentages across all included studies.

### Figure 3

Summary of standardised mean difference (SMD) and 95% confidence intervals (95%CI) of pain intensity for intervention comparisons and main subgroup group analyses of risk of bias (RoB) and trial arm size.

### Figure 4

Summary of subgroup group analyses of type of pain for the standardised mean difference (SMD) and 95 % confidence intervals (95%CI) of pain intensity between TENS and placebo. RCTs; randomised controlled trials.

## SUPPLEMENTARY MATERIALS

### Supplementary file 1 (File: 12\_12\_SupplementaryAppendix.docx)

Supplementary material providing details of all operational processes associated with our systematic review and meta-analysis including methods, data analyses and interpretation of findings.

### Supplementary file 2 (File: 08\_OL-TABLE1\_IncludedStudies)

Summary of the characteristics of the included randomised controlled trials

### Supplementary file 3 (File: 09\_OL-TABLE2\_AwaitingClassification)

Studies awaiting classification

### Supplementary file 4 (File: 10\_OL-TABLE3\_ExcludedStudies)

Summary of the reasons for excluding studies

### Supplementary file 5 (File: 06\_OL-Fig1\_SUBMIT)

Forest plot of standardised mean difference (SMD) and 95% confidence intervals (95%CI) of pain intensity rating between TENS and placebo with subgroup group analysis of risk of bias (RoB)

### Supplementary file 6 (File: 07\_OL-Fig2\_SUBMIT)

Forest plot of standardised mean difference (SMD) and 95% confidence intervals (95%CI) of pain intensity rating between TENS and placebo with subgroup group analysis of risk of bias (RoB)

### Supplementary file 7 (File: 11\_OL-TABLE4\_AdverseEvents)

Summary of the characteristics of TENS-related adverse events

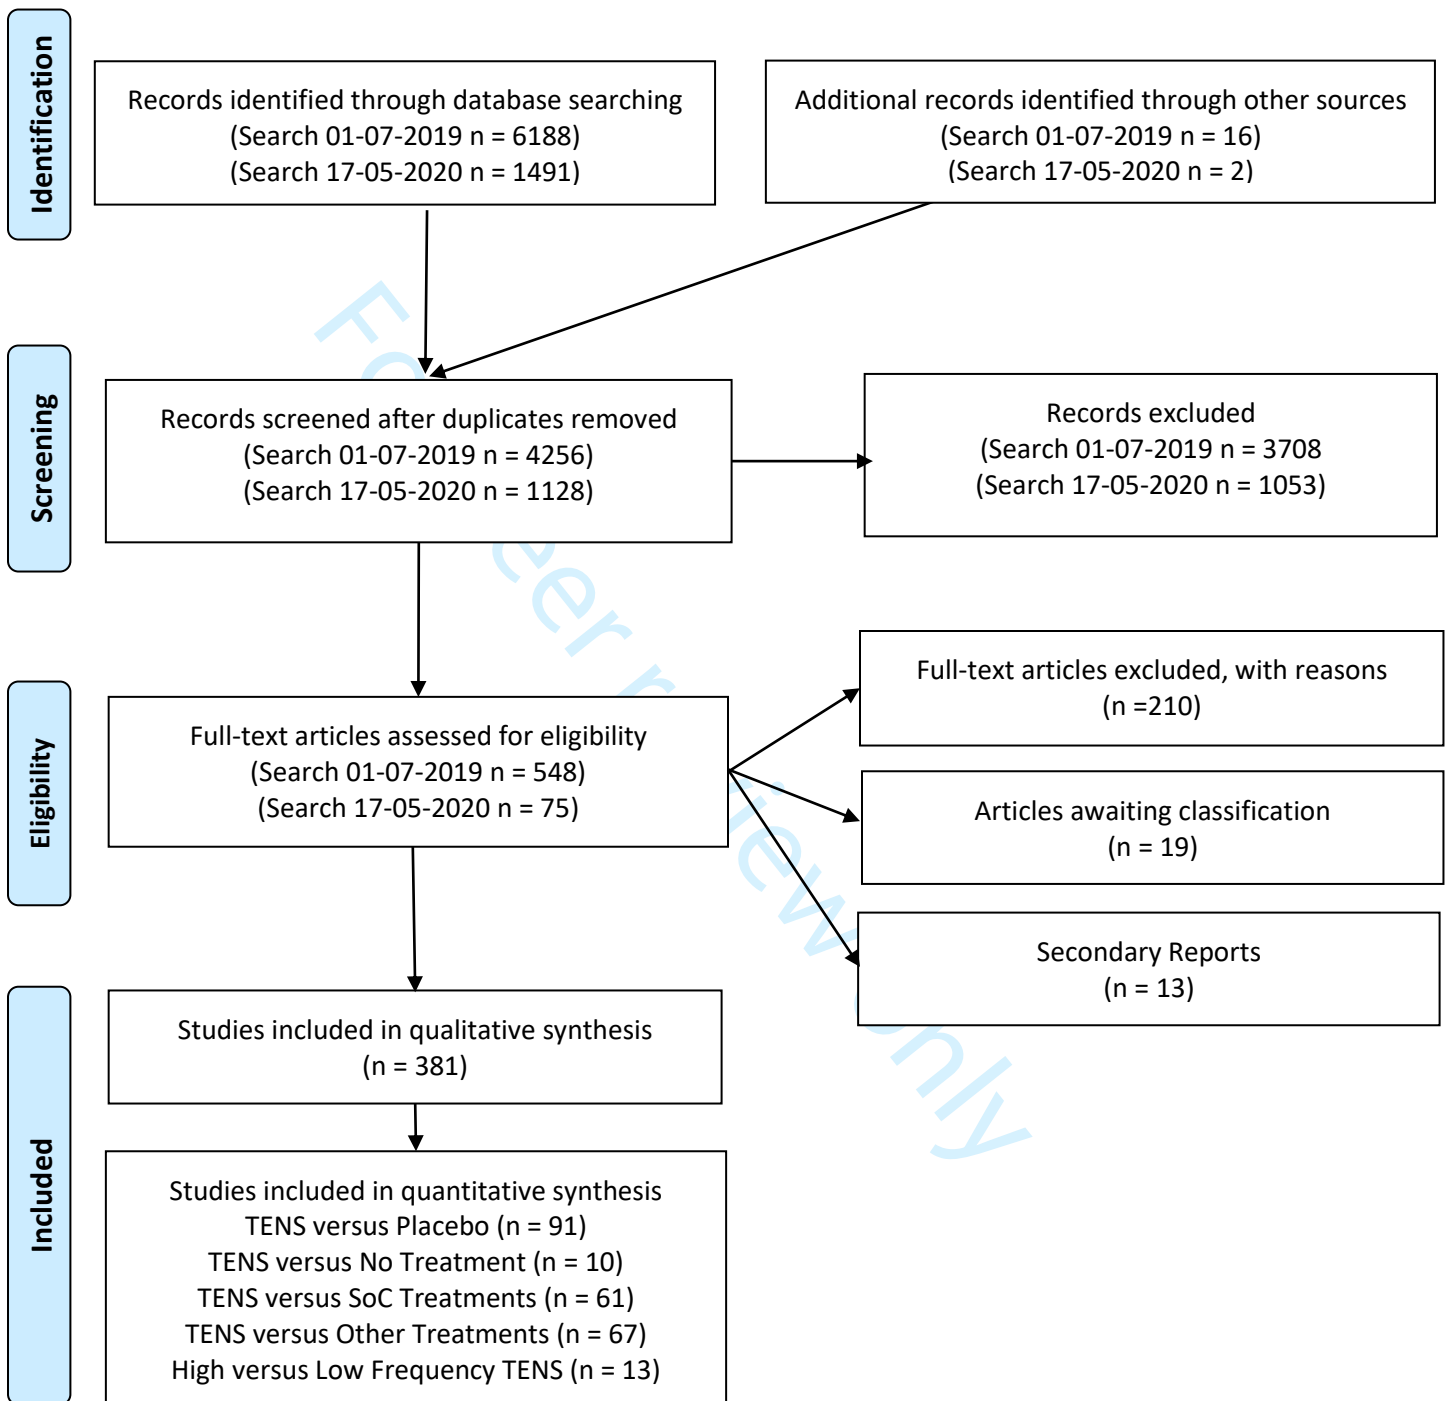

1  
2  
3  
4  
5  
6  
7  
8  
9  
10  
11  
12  
13  
14  
15  
16  
17  
18  
19  
20  
21  
22  
23  
24  
25  
26  
27  
28  
29  
30  
31  
32  
33  
34  
35  
36  
37  
38  
39  
40  
41  
42  
43  
44  
45  
46  
47  
48  
49  
50  
51  
52  
53  
54  
55  
56  
57  
58  
59  
60

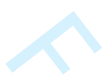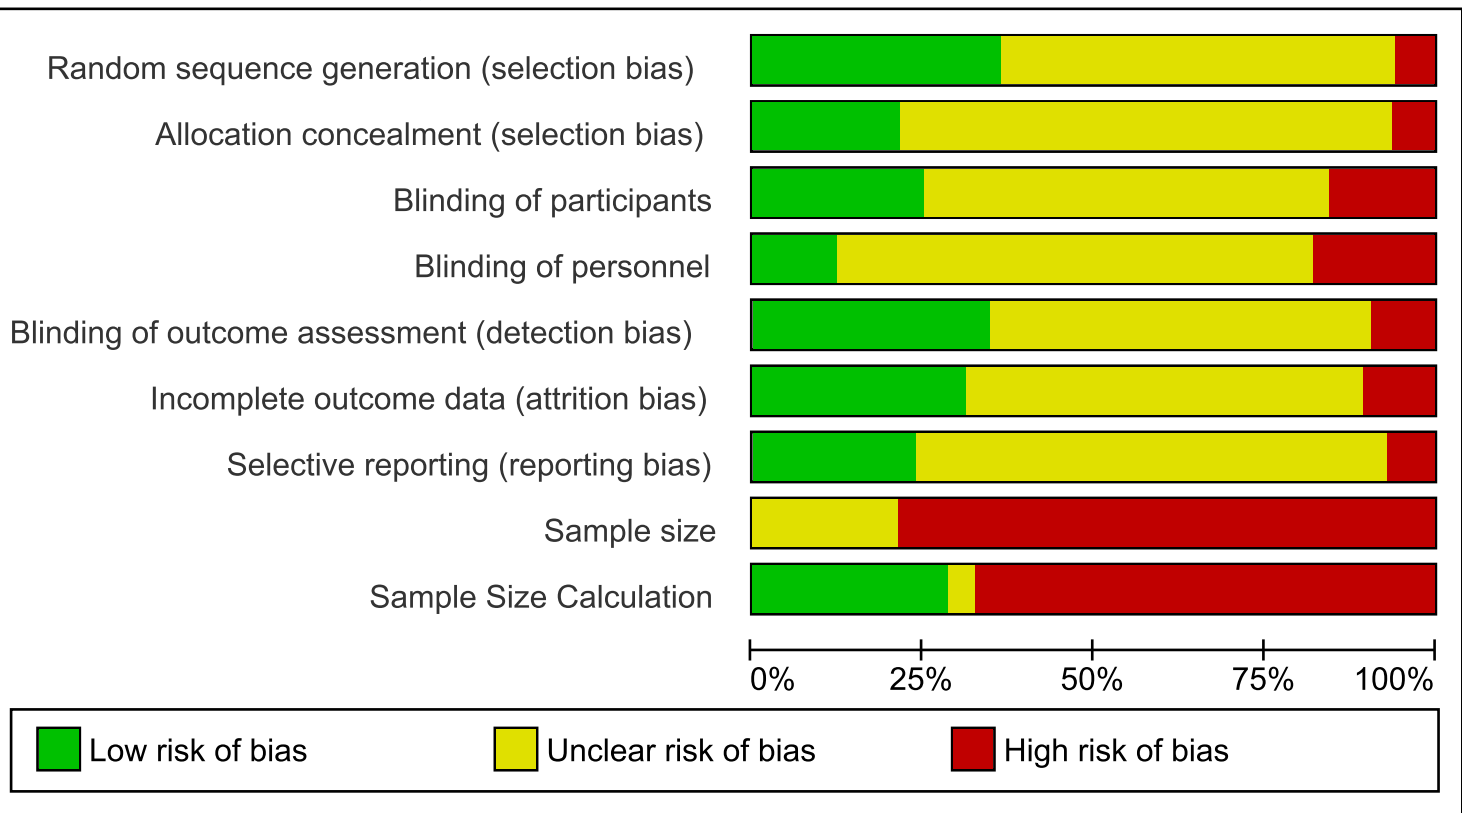

# Comparison

## TENS vs Placebo (91 RCTs, N = 4841)

- Low RoB (15 RCTs, N = 1104)

- High RoB (76 RCTs, N = 3737)

- n>50 participants per group (8 RCTs, N = 1197)

- n<50 participants per group (83 RCTs, N = 3644)

## TENS vs No Treatment (10 RCTs, N = 602)

## TENS vs SoC treatments (61 RCTs, N = 3155)

- Exercise/Physiotherapy (25 RCTs, N = 1114)

- Medication (27 RCTs, N = 1420)

## High vs Low Frequency (13 RCTs, N = 468)

(\*HF = high frequency; LF = low frequency)

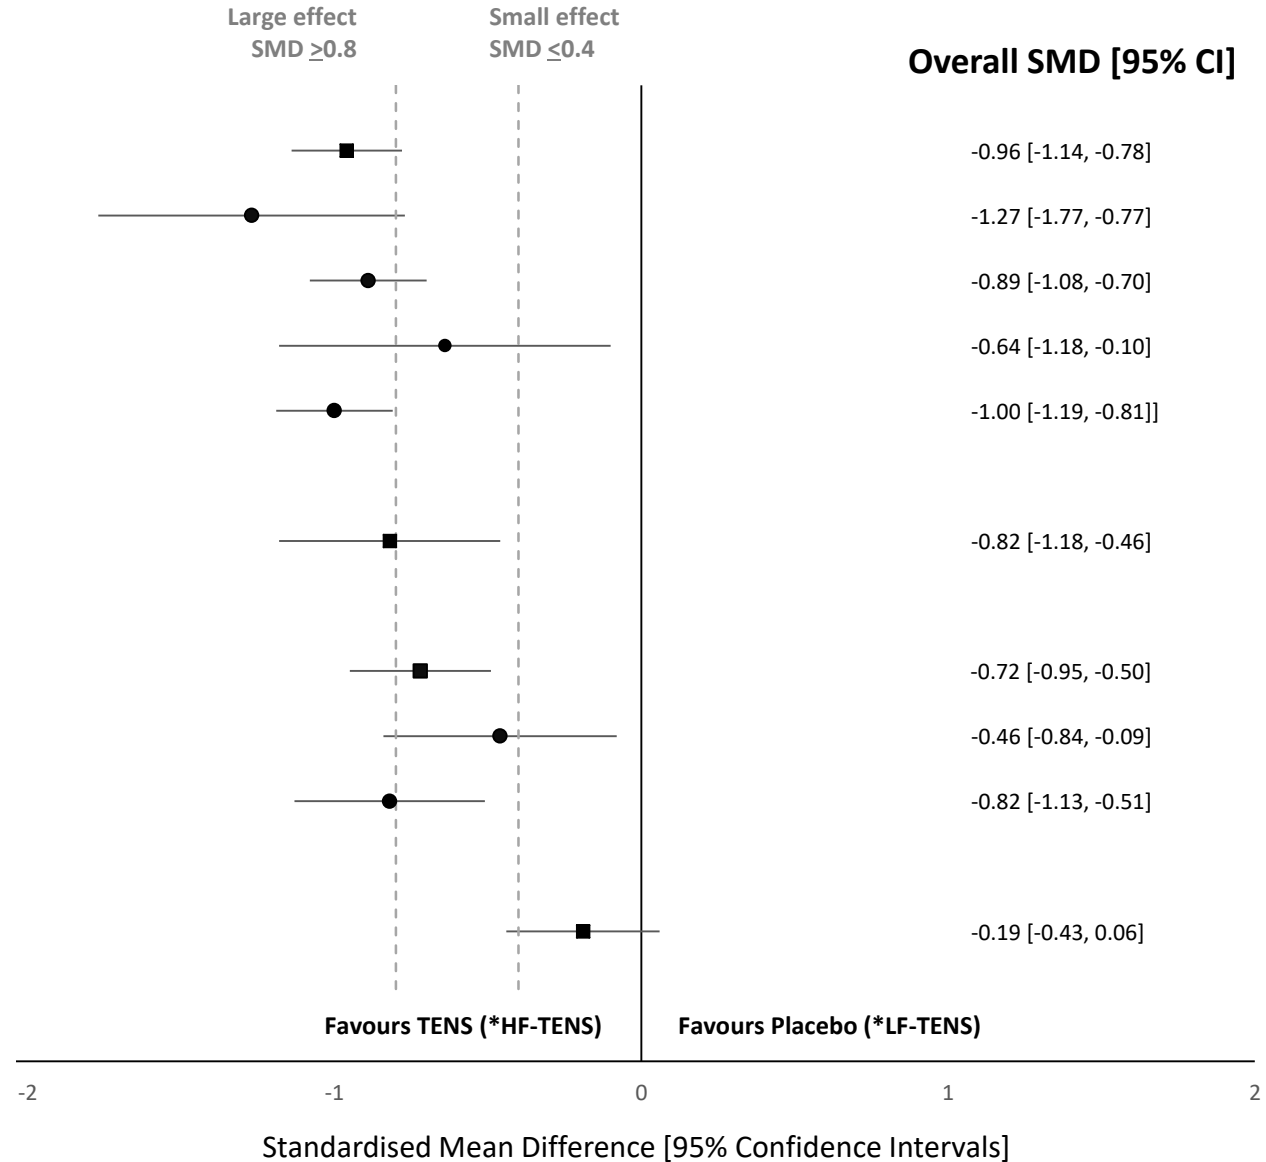

1  
2  
3  
4  
5  
6  
7  
8  
9  
10  
11  
12  
13  
14  
15  
16  
17  
18  
19  
20  
21  
22  
23  
24  
25  
26  
27  
28  
29  
30  
31  
32  
33  
34  
35  
36  
37  
38  
39  
40  
41

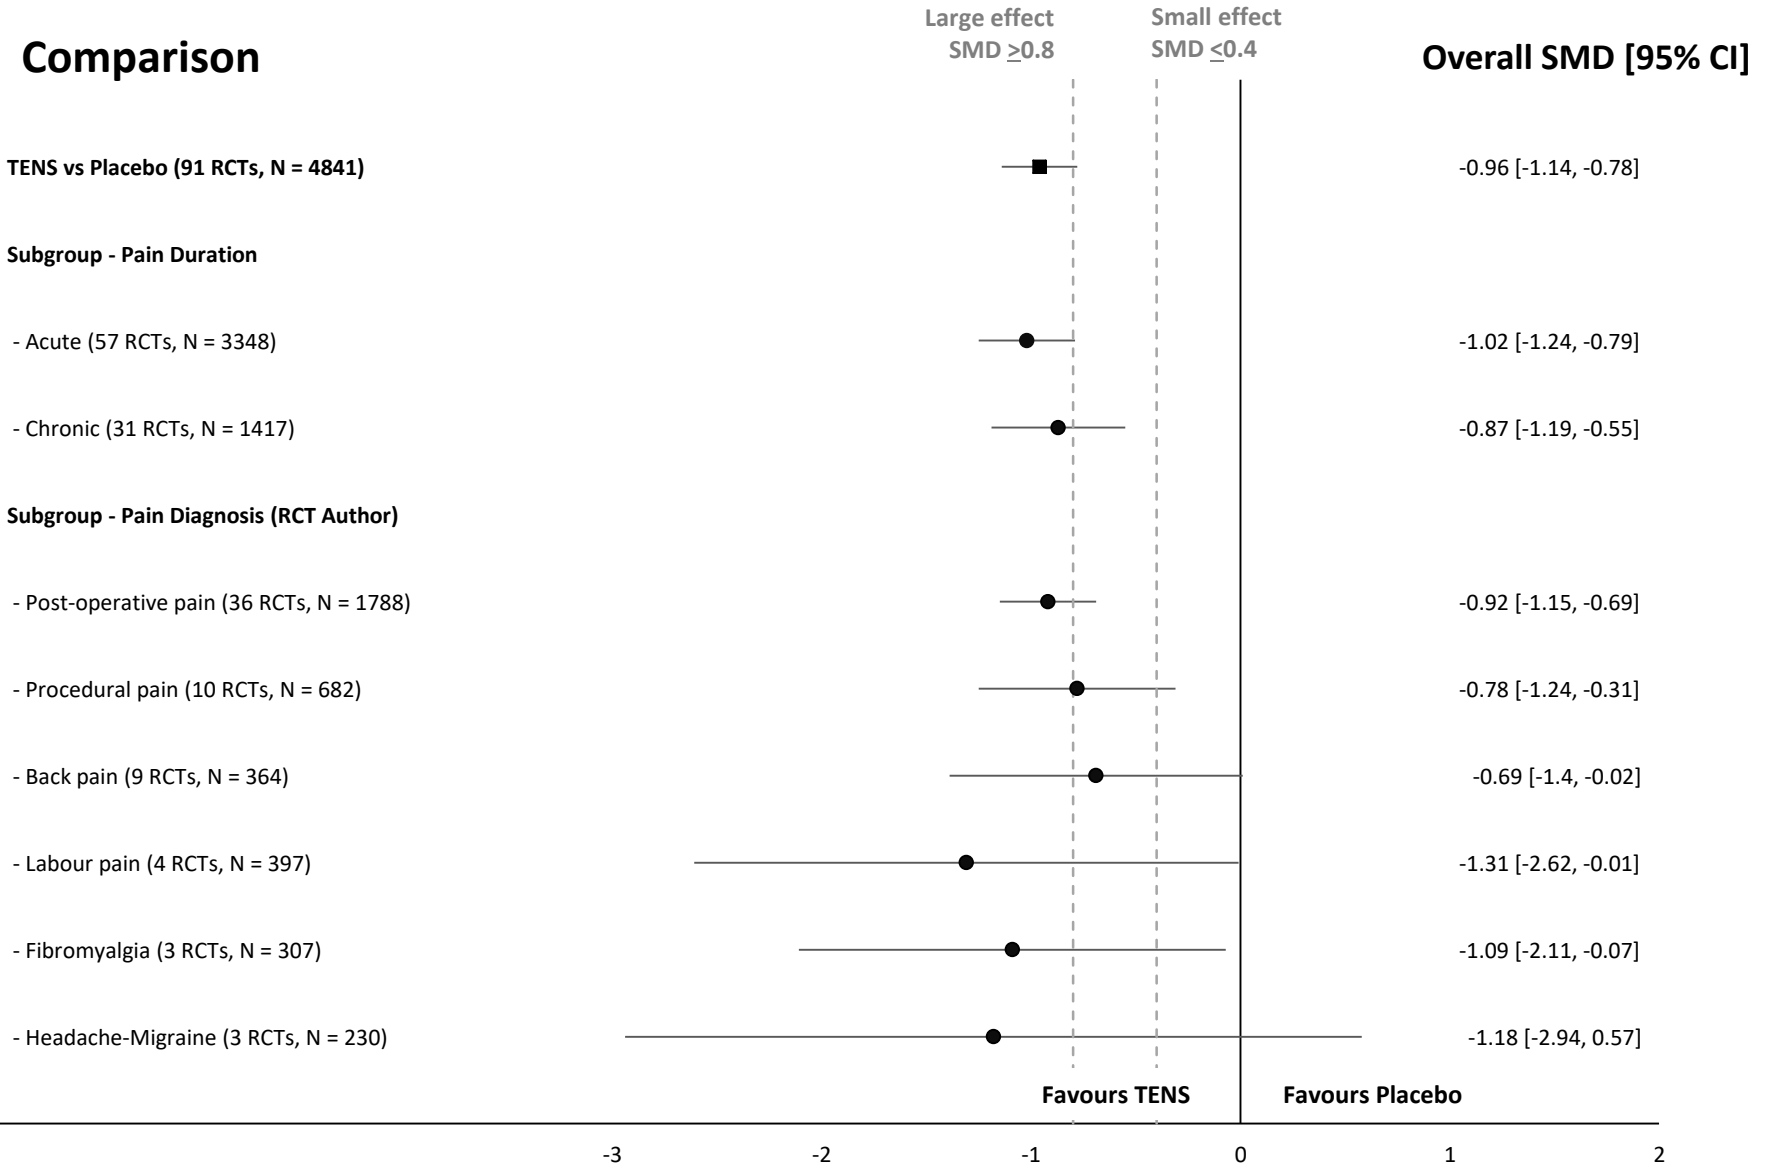

**Appendix - Supplementary Material**

**Efficacy and Safety of Transcutaneous Electrical Nerve Stimulation (TENS) for Acute and Chronic Pain: A systematic review and meta-analysis (Meta-TENS)**

**Context**

This document provides detailed information about all operational processes associated with our systematic review and meta-analysis.

**Contents**

**Table of Contents**

Contents..... 1

METHODS..... 6

Search Strategy..... 6

    Search methods for identification of studies..... 6

        Electronic searches ..... 6

        MEDLINE Search Terms for RCTs ..... 7

        MEDLINE Search Terms for systematic reviews..... 7

Eligibility Screening ..... 8

    Description of screening for eligibility ..... 8

        Selection of studies ..... 8

        Types of outcome measures ..... 8

        Types of studies ..... 8

        Types of participants..... 8

        Types of TENS interventions ..... 9

        Non-invasive..... 9

        Type of TENS Device..... 9

        TENS Technique ..... 9

        Determining the primary TENS intervention ..... 9

        Dosage and Regimen ..... 10

        TENS alone or as adjunct ..... 10

Evaluation of TENS Treatment Effects ..... 10

    Placebo comparators ..... 10

    No treatment or waiting list control comparators ..... 10

    Standard of care comparators ..... 10

    Other treatment comparators ..... 11

Reviewer Aide memoire and Operational Checklist for Eligibility Screening ..... 11

    A. Screening of Titles/Abstracts ..... 11



|    |                                                                                                 |    |
|----|-------------------------------------------------------------------------------------------------|----|
| 1  |                                                                                                 |    |
| 2  |                                                                                                 |    |
| 3  | B. Screening of Full Reports .....                                                              | 12 |
| 4  | C. Reasons for exclusion codes .....                                                            | 13 |
| 5  |                                                                                                 |    |
| 6  | Reviewer Aide memoire and Operational Checklist for Extracting Study Characteristics of study.. | 14 |
| 7  |                                                                                                 |    |
| 8  | Methods to Assess Risk of bias .....                                                            | 14 |
| 9  |                                                                                                 |    |
| 10 | Description of operational approaches to assess risk of bias in included studies.....           | 14 |
| 11 | Selection bias .....                                                                            | 15 |
| 12 | Performance bias .....                                                                          | 15 |
| 13 | Attrition bias .....                                                                            | 16 |
| 14 | Reporting bias .....                                                                            | 16 |
| 15 | Sample size.....                                                                                | 16 |
| 16 |                                                                                                 |    |
| 17 | Statement that sample size was estimated a priori.....                                          | 16 |
| 18 |                                                                                                 |    |
| 19 | Reviewer Aide Memoire and Operational Checklist for Assessment of Risk of Bias.....             | 17 |
| 20 |                                                                                                 |    |
| 21 | Measures and Analysis of treatment effect.....                                                  | 26 |
| 22 |                                                                                                 |    |
| 23 | Evaluation of Pain Outcomes: Description of principles and operational procedures.....          | 26 |
| 24 | Primary Pain Outcomes .....                                                                     | 26 |
| 25 | Secondary Pain Outcomes .....                                                                   | 26 |
| 26 |                                                                                                 |    |
| 27 | Evaluation of Adverse Events: Description of principles and operational procedures .....        | 26 |
| 28 | Unit of analysis issues .....                                                                   | 27 |
| 29 | Dealing with missing data .....                                                                 | 27 |
| 30 |                                                                                                 |    |
| 31 | Data synthesis.....                                                                             | 27 |
| 32 |                                                                                                 |    |
| 33 | Assessment of heterogeneity .....                                                               | 28 |
| 34 |                                                                                                 |    |
| 35 | Subgroup Analyses: Descriptions of the principles and operational procedures.....               | 28 |
| 36 | Subgroup analyses: Interpreting the findings.....                                               | 29 |
| 37 |                                                                                                 |    |
| 38 | Reporting (Publication) Biases: Descriptions of operational procedures.....                     | 29 |
| 39 |                                                                                                 |    |
| 40 | Quality of the evidence.....                                                                    | 31 |
| 41 | Sensitivity analysis .....                                                                      | 31 |
| 42 |                                                                                                 |    |
| 43 | RESULTS .....                                                                                   | 32 |
| 44 |                                                                                                 |    |
| 45 | Results of the search.....                                                                      | 32 |
| 46 | Management of multiple records (secondary reports) of one RCT .....                             | 32 |
| 47 | Management of multiple samples within one report.....                                           | 32 |
| 48 | Management of errors detected in previous meta-analyses .....                                   | 32 |
| 49 |                                                                                                 |    |
| 50 | Description of reasons for excluding studies.....                                               | 33 |
| 51 |                                                                                                 |    |
| 52 | Violations of criteria for 'standard TENS' .....                                                | 33 |
| 53 | Violations of criteria for appropriate body site for TENS.....                                  | 33 |
| 54 | Violations of criteria for adult participants.....                                              | 34 |
| 55 |                                                                                                 |    |
| 56 | Studies Awaiting Classification .....                                                           | 34 |
| 57 |                                                                                                 |    |
| 58 | Description of Included RCTs .....                                                              | 34 |
| 59 | Characteristics of included trials.....                                                         | 34 |
| 60 |                                                                                                 |    |

1  
2  
3  
4  
5  
6  
7  
8  
9  
10  
11  
12  
13  
14  
15  
16  
17  
18  
19  
20  
21  
22  
23  
24  
25  
26  
27  
28  
29  
30  
31  
32  
33  
34  
35  
36  
37  
38  
39  
40  
41  
42  
43  
44  
45  
46  
47  
48  
49  
50  
51  
52  
53  
54  
55  
56  
57  
58  
59  
60

Characteristics of TENS interventions..... 35

Characteristics of Outcome Measures..... 37

Overall Risk of Bias ..... 38

Randomisation and Allocation (selection bias)..... 38

Blinding (performance bias and detection bias)..... 38

Incomplete outcome data (attrition bias)..... 38

Selective reporting (reporting bias) ..... 38

Sample size..... 38

Sample size estimation ..... 38

TENS versus placebo: Analysis of effects ..... 40

    Outcome: Pain intensity - expressed as mean (continuous) data ..... 40

        Subgroup – Methodological Characteristics ..... 42

        Subgroup – Pain Characteristics ..... 44

        Plausibility Pain Characteristics - subgroup findings ..... 48

    Analysis of Publication Bias - TENS vs Placebo ..... 48

    Outcome: >30% reduction in pain ..... 49

    Outcome: >50% reduction in pain (i.e. >substantial pain relief) ..... 49

TENS versus no treatment - Analysis of effects ..... 50

    Outcome: Pain intensity - expressed as mean (continuous) data ..... 50

        Analysis of publication bias – TENS vs No Treatment..... 50

    Outcome: >30% reduction in pain ..... 51

    Outcome: >50% reduction in pain ..... 51

TENS versus standard of care - Analysis of effects ..... 52

    Outcome: Pain intensity - expressed as mean (continuous) data ..... 52

        Analysis of publication bias – TENS vs SoC ..... 53

    Outcome: >30% reduction in pain ..... 53

    Outcome: >50% reduction in pain ..... 53

TENS versus Other Treatments - Analysis of effects..... 54

    Outcome: Pain intensity - expressed as mean (continuous) data ..... 54

        Analysis of publication bias – TENS vs. Other treatment..... 56

    Outcome: >30% reduction in pain ..... 56

    Outcome: >50% reduction in pain ..... 56

High frequency TENS versus low frequency TENS - Analysis of effects ..... 57

    Outcome: Pain intensity - expressed as mean (continuous) data ..... 57

        Analysis of publication bias – High vs. low frequency TENS ..... 57

    Outcome: >30% reduction in pain ..... 57

    Outcome: >50% reduction in pain ..... 58

Adverse events - Analysis of effects ..... 59

|    |                                                                                  |    |
|----|----------------------------------------------------------------------------------|----|
| 1  |                                                                                  |    |
| 2  |                                                                                  |    |
| 3  | Outcome: Relative Risk .....                                                     | 59 |
| 4  | Plausibility: Minor and infrequent adverse events from TENS.....                 | 60 |
| 5  | Potential biases in the review process: Description .....                        | 61 |
| 6  | Search strategy and screening process - Limitations.....                         | 61 |
| 7  | Effects size estimates - Limitations in the analysis (confounding factors) ..... | 61 |
| 8  | Sample size.....                                                                 | 61 |
| 9  | Quality of reporting - observations.....                                         | 61 |
| 10 | Trial Design - Pragmatic and Exploratory .....                                   | 61 |
| 11 | Cross-over studies - Sensitivity analysis.....                                   | 61 |
| 12 | Appropriateness of TENS .....                                                    | 62 |
| 13 | Measurement time points .....                                                    | 62 |
| 14 | Contamination .....                                                              | 62 |
| 15 | Risk of Performance Bias (blinding participant).....                             | 63 |
| 16 | Adverse events - Limitations in the analysis .....                               | 63 |
| 17 | Certainty and Quality of Evidence .....                                          | 65 |
| 18 | GRADE Methodology .....                                                          | 65 |
| 19 | GRADE: Summary of Findings .....                                                 | 66 |
| 20 | TENS versus Placebo .....                                                        | 66 |
| 21 | TENS versus No Treatment .....                                                   | 68 |
| 22 | TENS versus Standard of Care (SoC) .....                                         | 69 |
| 23 | TENS versus Other Treatment.....                                                 | 70 |
| 24 | High Frequency versus Low Frequency TENS .....                                   | 71 |
| 25 | Adverse events.....                                                              | 73 |
| 26 | Plausibility of Findings.....                                                    | 75 |
| 27 | Physiological Plausibility .....                                                 | 75 |
| 28 | Clinical Plausibility.....                                                       | 75 |
| 29 | Overall completeness and applicability of evidence .....                         | 75 |
| 30 | Predominance of in-clinic RCTs.....                                              | 75 |
| 31 | Paucity of long-term follow-up .....                                             | 76 |
| 32 | Paucity of RCTs on prevalent chronic pain conditions.....                        | 76 |
| 33 | Follow-up analyses emerging from this review are:.....                           | 76 |
| 34 | Agreements and disagreements with other studies or reviews.....                  | 77 |
| 35 | Inconsistency in clinical guidelines .....                                       | 77 |
| 36 | Cost-benefit.....                                                                | 77 |
| 37 | Conclusions .....                                                                | 77 |
| 38 | Implications for practice .....                                                  | 78 |
| 39 | For people with pain .....                                                       | 78 |
| 40 | For clinicians.....                                                              | 78 |
| 41 |                                                                                  |    |
| 42 |                                                                                  |    |
| 43 |                                                                                  |    |
| 44 |                                                                                  |    |
| 45 |                                                                                  |    |
| 46 |                                                                                  |    |
| 47 |                                                                                  |    |
| 48 |                                                                                  |    |
| 49 |                                                                                  |    |
| 50 |                                                                                  |    |
| 51 |                                                                                  |    |
| 52 |                                                                                  |    |
| 53 |                                                                                  |    |
| 54 |                                                                                  |    |
| 55 |                                                                                  |    |
| 56 |                                                                                  |    |
| 57 |                                                                                  |    |
| 58 |                                                                                  |    |
| 59 |                                                                                  |    |
| 60 |                                                                                  |    |

MetaTENS\_SupplementaryAppendix\_FINAL\_23-12-2020

1  
2  
3           For policymakers..... 78  
4           For funders..... 78  
5  
6           Implications for research ..... 79  
7  
8           References in Supplementary Appendix..... 80  
9  
10  
11  
12  
13  
14  
15  
16  
17  
18  
19  
20  
21  
22  
23  
24  
25  
26  
27  
28  
29  
30  
31  
32  
33  
34  
35  
36  
37  
38  
39  
40  
41  
42  
43  
44  
45  
46  
47  
48  
49  
50  
51  
52  
53  
54  
55  
56  
57  
58  
59  
60

For peer review only

## METHODS

The protocol for this study has been published <sup>1</sup> and is available from <https://bmjopen.bmj.com/content/9/10/e029999>. An abridged version of the protocol with operational decisions and key findings are described in this Supplementary Material.

The protocol was registered on PROSPERO (CRD42019125054).

This systematic review and meta-analysis were conducted in accordance with

- Preferred Reporting Items for Systematic Review and Meta-analysis (PRISMA) <sup>2</sup>
- Cochrane Collaboration of Systematic Reviews <sup>3</sup>
- Grading and Recommendations, Assessment, Development and Evaluation (GRADE) <sup>4</sup>.

### Search Strategy

#### Search methods for identification of studies

We conducted a literature search to identify RCTs published from date of inception of the database and screened them against our eligibility criteria for inclusion in our review. The purpose of the search was to provide comprehensive coverage of a wide variety of pain conditions (broadly based on the World Health Organisation's (WHO) International Classification of Disease (ICD-11) categories for acute and for chronic pain), at various stages (e.g. acute, chronic) and from various settings (e.g. palliative, community, primary, secondary, tertiary).

In addition, we conducted a literature search to identify systematic reviews on TENS and screened them against our eligibility criteria for the inclusion of previously published systematic reviews in our review. We planned to undertake a descriptive analysis of findings but did not plan to evaluate or quality-assess these systematic reviews. We harvested RCTs from these systematic reviews and mapped inclusion of RCTs across previous systematic reviews.

#### Electronic searches

We searched the following electronic databases using a combination of controlled vocabulary, i.e. medical subject headings (MeSH) and free-text terms to identify published RCTs and systematic reviews from inception to the date of the search

- Cochrane Library (CENTRAL);
- MEDLINE (via PubMed);
- Embase (via OVID);
- CINAHL (via EBSCO);
- PsycINFO (via EBSCO);
- LILACS (via Bireme);
- PEDRO;
- Web of Science;
- AMED (via OVID);
- SPORTDiscus (via EBSCO).

We tailored searches to the individual databases by adapting the MEDLINE search strategy for the other databases listed. There were no language restrictions and we identified all relevant RCTs irrespective of language and translated articles where possible. We also conducted a literature search to identify systematic reviews on TENS and harvested any outstanding RCTs. We did not search trial registries nor seek data from any unpublished studies identified. We contacted authors

via email to clarify issues relating to inclusion, risk of bias and missing data. The original search was conducted during July 2019; this was updated on 17 May 2020.

### **MEDLINE Search Terms for RCTs**

1. EXP Transcutaneous Electric Nerve Stimulation/
- 2 TENS.ti,ab
- 3 TNS.ti,ab
- 4 ENS.ti,ab
- 5 transcutaneous electric\* nerve stimulation.ti,ab.
- 6 transcutaneous nerve stimulation.ti,ab
- 7 electric\* nerve stimulation.ti,ab
- 8 electrostimulation therap\*.ti,ab
- 9 electro-stimulation therap\*.ti,ab.
- 10 electric\* nerve therap\*.ti,ab
- 11 electroanalgesi\*.ti,ab
- 12 transcutaneous electric\* stimulation.ti,ab.
- 13 TES.ti,ab
- 14 or/1-13
- 15 Pain
- 16 Randomized controlled trial. pt.
- 17 Controlled clinical trial.pt.
- 18 16 OR 17
- 19 14 AND 15 AND 18

### **MEDLINE Search Terms for systematic reviews**

1. EXP Transcutaneous Electric Nerve Stimulation/
- 2 TENS.ti,ab
- 3 TNS.ti,ab
- 4 ENS.ti,ab
- 5 transcutaneous electric\* nerve stimulation.ti,ab.
- 6 transcutaneous nerve stimulation.ti,ab
- 7 electric\* nerve stimulation.ti,ab
- 8 electrostimulation therap\*.ti,ab
- 9 electro-stimulation therap\*.ti,ab.
- 10 electric\* nerve therap\*.ti,ab
- 11 electroanalgesi\*.ti,ab
- 12 transcutaneous electric\* stimulation.ti,ab.
- 13 TES.ti,ab
- 14 or/1-13
- 15 Pain
- 16 Systematic review. Pt.
- 17 Meta-analysis.pt.
- 18 16 OR 17
- 19 14 AND 15 AND 18

## Eligibility Screening

### Description of screening for eligibility

#### *Selection of studies*

Two review authors (PGW and MIJ) independently screened records to identify RCTs. We removed duplicates and eliminated records that clearly did not satisfy the inclusion criteria. Full text reports of potentially eligible RCTs were obtained and screened for eligibility by two review authors (PGW and MIJ). Reasons for exclusion were documented and coded against broad exclusion criteria.

Two review authors (PGW and MIJ) screened records to identify systematic reviews on TENS and read full text reports to create a list of RCTs included in each systematic review. Disagreements at any stage of the process were resolved by consensus using a third review author as arbiter (CAP).

We did not anonymise records of systematic reviews or RCTs in any way before assessment. We created a PRISMA flow chart <sup>2</sup>.

#### *Types of outcome measures*

We included RCTs that measured pain using standard subjective scales (numerical rating scale (NRS) or visual analogue scale (VAS) for pain intensity or pain relief, or both. We included measures of pain at rest and pain on movement. We also planned to extract other pain measures assessed using condition specific questionnaires (e.g. Western Ontario and McMaster Universities Osteoarthritis Index (WOMAC), Fibromyalgia Impact Questionnaire (FIQ)). We extracted outcome measurement data before, during, and after the intervention, where data was available.

We extracted data for adverse effects of any type or severity as descriptions from participants and number of withdrawals and/or stopping of treatment. Serious adverse events were defined as untoward medical occurrence or effect resulting in death, threat to life, hospitalisation, significant disability or incapacity, congenital anomaly or birth defect (see Section Methods of Analysis: Adverse Events). We also planned to extract data on clinical status or health-related quality of life and treatment satisfaction.

#### *Types of studies*

We included randomised controlled trials (RCTs) of TENS treatment for acute or chronic pain of any origin. We excluded studies that were non-randomised, case reports and clinical observations. We included studies providing the author used the term 'randomisation' in the report. Quasi-RCTs with sequential allocation to groups were excluded. It was noted that some of these studies have been included in previous systematic reviews (e.g. quasi-RCT by Carbonario et al., 2013 <sup>5</sup>).

We included parallel group and crossover trial designs. We included single treatment interventions without follow-up and planned to conduct a subgroup analyses of RCTs that delivered at least two weeks of treatment and had a duration of at least eight weeks as these are considered as best practice. We required full journal publication of a full trial report and did not include, online clinical trial results, summaries of otherwise unpublished clinical trials, abstracts or letters.

#### *Types of participants*

We pre-specified that we would include RCTs of adult participants aged 18 years or above with any type of clinical pain, but subsequently decided to include a few RCTs that had a participants with a minimum age of 16 years because more than 95% of the sample were at least 18 years. All RCTs that had at least one participant under 16 years of age (i.e. children) were excluded.

### **Types of TENS interventions**

We included all RCTs that administered TENS as non-invasive electrical stimulation of the skin with the intention of stimulating peripheral nerves to alleviate pain using a standard TENS device<sup>6,7</sup>.

#### **Non-invasive**

We included RCTs that administered TENS across the intact surface of the skin using surface electrodes and excluded invasive nerve stimulation techniques such as percutaneous electrical nerve stimulation and electro-acupuncture.

#### **Type of TENS Device**

We only included RCTs that evaluated TENS using a 'standard TENS device' defined as "... a portable, battery-powered generator of monophasic or biphasic pulsed electrical current delivered in a repetitive manner, with a maximum peak-to-peak amplitude of approximately 60 milliamperes (mA) into a 1 kilohm load." p12<sup>6</sup> and regardless of the device manufacturer.

We excluded RCTs that did not use pulsed electrical currents or administered 'TENS-like' currents not considered output specifications of a standard TENS device (e.g. interferential current, microcurrent), even if the trial authors described the intervention as TENS. We excluded RCTs where the primary intention of TENS was not to stimulate peripheral nerves to alleviate pain (e.g. TENS for bladder dysfunction, constipation, dementia)<sup>7,6</sup>. We excluded TENS delivered using single probe electrodes (i.e. TENS pens) or using matrix electrodes and electrode arrays. We included TENS administered using electrodes integrated into garments such as knee braces, cuffs, gloves and/or socks providing they did not deviate from the exclusions described previously.

#### **TENS Technique**

We included RCTs irrespective of the term used to describe the type of TENS technique (e.g. conventional TENS, acupuncture-Like TENS, high-frequency-low-intensity, low-frequency-high intensity, etc.).

We included RCTs where electrodes were located at (a) the site of pain or (b) over nerve bundles proximal (or near) to the site of pain. We included TENS delivered at acupuncture points only if the point was lying over nerve bundles proximal (or near) to the site of pain.

We included RCTs irrespective of the current amplitude of TENS and/or participant-reported TENS intensity. We planned to exclude RCTs if TENS was administered to areas of the body that were not sensate although there were no instances of this. We considered participant-reported strong but comfortable TENS sensations as optimal and used this as our primary TENS comparison group. We planned to conduct a subgroup analysis to compare TENS at intensities described as 'strong' (optimal) versus those described as 'mild', 'faint', or 'barely perceptible' (sub-optimal), although none of our primary TENS comparisons fell into this latter category.

We included RCTs that delivered TENS at intensities above motor threshold providing TENS was administered using a standard TENS device with the primary intention of stimulating peripheral nerves to alleviate pain.

We included RCTs that administered TENS using pulse frequencies no more than 250 pulses per second (pps) and pulse durations no more than 1 millisecond (1000us). We suspected that some reports had notation errors of SI units expressing microseconds as ms (e.g. 200ms) instead of  $\mu$ s (e.g. 200 microseconds). We included any type of pulse pattern.

#### **Determining the primary TENS intervention**



We used high frequency pulses delivered using a continuous pulse pattern as our primary TENS comparison group, followed by (i) low frequency TENS delivered either as low frequency pulses or low frequency bursts (trains) of high frequency pulses delivered using a burst pattern of stimulation continuous pulse pattern, (ii) modulated frequency TENS, or (iii) alternating (switching) frequency TENS.

### ***Dosage and Regimen***

We included RCTs that administered TENS for any duration or regularity of treatment. We included TENS that was administered by a therapist and/or self-administered by study participants.

### ***TENS alone or as adjunct***

We included TENS administered as a sole treatment or in combination with other treatments. We excluded RCTs where it was not possible to isolate the effects of TENS from other treatments.

### **Evaluation of TENS Treatment Effects**

We included RCTs that evaluated TENS versus:

- placebo (e.g. sham (no current) TENS device);
- no treatment or waiting list control;
- standard of care; and
- other treatment, both pharmacological and non-pharmacological.

### ***Placebo comparators***

We included any type of placebo in our analysis but prioritised findings comparing TENS with a placebo (sham) TENS device. Such devices are identical in appearance to the real TENS device but have been modified so that the patient receives no electrical current; or pulses of current that fade to 0mA within one minute<sup>8,9</sup>; or pulses with excessively long inter-stimulus intervals to render them of no physiological consequence. Another approach has been to administer very low amplitude current that is below sensory detection threshold. We included all such approaches and conducted a subgroup analysis of the different approaches.

Ensuring the credibility and blinding of placebo TENS can be problematic because it is not possible to blind participants to TENS sensation. It is possible, however, to generate uncertainty about allocation to active and inactive TENS<sup>10</sup>. We considered the use of a sham TENS device coupled with appropriate briefing information as an adequate method of blinding. We described measures of the adequacy of blinding and/or the perception of participants about the credibility of the placebo intervention in terms of a 'functioning' device on a study by study basis.

### ***No treatment or waiting list control comparators***

We considered an intervention as 'no treatment' if we were assured that the participants did not receive any other 'active' treatment. We did not include interventions described as controls that allowed patients any type of active treatment, including medication or exercise. Thus, RCTs that compared TENS in combination with a pharmacological agent versus a control consisting of the pharmacological agent on its own were not included in this analysis.

### ***Standard of care comparators***

We considered an intervention as 'standard of care' if trial authors considered the intervention or intervention(s) to be fully or part of 'common', 'routine', or 'standard' practice and/or care, irrespective of whether authors explicitly named the intervention as 'standard of care'. Interventions were either TENS compared head-to-head with a SoC intervention (i.e. TENS vs SoC) or TENS as an adjunct to a SoC intervention (i.e. TENS combined with SoC vs SoC alone).

To avoid 'double-counting' and unit-of-analysis errors, we did not enter several interventions into the same meta-analysis from a study having more than one treatment comparator as this would result in multiple counts of the primary TENS group). There were no instances of this for SoC.

### ***Other treatment comparators***

We considered an intervention as 'other treatment' if participants received a comparison intervention that had not been categorised as standard of care (SoC). The purpose of the analysis was to undertake a head-to-head comparison of TENS versus another treatment, so we extracted data that enabled isolation of effects between TENS and another treatment providing any additional care and/or treatment was standardised between groups, e.g. in instances when patients were also given pharmacological, exercise, or physiotherapy-based treatment. The nature of comparisons was either TENS compared head-to-head with another treatment either alone or on a background of care standardised between groups.

To avoid 'double-counting' and unit-of-analysis errors, we pre-specified that we would not enter several interventions into the same meta-analysis from a study having more than one treatment comparator as this would result in multiple counts of the primary TENS group. Unfortunately, there were many instances of a study having more than one treatment comparator for the other treatment analysis.

We decided not to undertake a subgroup analyses comparing Other Treatments because

- This would result in multiple counts of the primary TENS group
- Of the wide variability in the type of interventions.
- None of these other treatment subgroups met our criteria for precision of at least 500 pooled data points in a treatment arm.

We did produce a Forest plot that included multiple treatments from the same study for visual inspection. Also, we calculated overall treatment effect sizes for Other Treatments that had at least 100 pooled data points in each trial arm. These included:

- Interferential therapy
- Pharmacology
- Ultrasound
- Acupuncture and electroacupuncture
- Diadynamic currents
- Electrical muscle stimulation
- Heat therapy
- Percutaneous electrical nerve stimulation

We decided not to report these in the final report because all were below the threshold for pooled data precision. We did not appraise certainty of evidence using GRADE.

## **Reviewer Aide memoire and Operational Checklist for Eligibility Screening**

### ***A. Screening of Titles/Abstracts***

Do not carry forward if title/abstract indicates ...

1. Definitely NOT non-invasive electrical stimulation
2. Definitely NOT humans

3. Definitely NOT adults with clinical condition
4. Definitely NOT a randomised controlled trial (RCTs)
5. Definitely NOT clinical pain (acute or chronic)
6. Definitely NOT TENS
  - carry forward if on electrotherapy and extract RCTs on TENS – include reports with TENS in scope but fail to identify any TENS SRs
  - carry forward if uncertain whether SR focussed on 'standard TENS' (e.g. TENS characteristics (type of currents), type and location of electrodes (acupoints, single probe electrode etc.) and/or type of device (i.e. TENS-like))

#### Action

Code gross reasons for 'not carried forward' into the master Excel file

Obtain Full Reports

#### **B. Screening of Full Reports**

Do not carry forward if Full Report indicates ...

1. Definitely NOT non-invasive electrical stimulation
2. Definitely NOT humans
3. Definitely NOT adults with clinical condition
4. Definitely NOT a randomised controlled trial (RCTs)
5. Definitely NOT clinical pain (acute or chronic)
6. Definitely NOT TENS
  - carry forward if on electrotherapy and extract RCTs on TENS – include reports with TENS in scope but fail to identify any TENS SRs
  - carry forward if uncertain whether SR focussed on 'standard TENS' (e.g. TENS characteristics (type of currents), type and location of electrodes (acupoints, single probe electrode etc.) and/or type of device (i.e. TENS-like))
7. TENS definitely NOT delivered to site of pain or over relevant nerve bundle (i.e. TENS on distal/remote sites)
8. Definitely NOT able to isolate/extract effects due to TENS (combination therapy without appropriate control comparison)
9. TENS treatment given pre-emptively before surgery but not postoperatively whilst patient in pain
10. Other

Screening against specific TENS criteria - Include trial providing TENS

1. non-invasive
  2. intention of exciting peripheral nerves to alleviate pain
  3. body sensate
  4. irrespective of the current amplitude of TENS and/or participant-reported TENS intensity
    - a) strong' (optimal) - 'mild', 'faint', or 'barely perceptible' (sub-optimal)
    - b) muscle twitches if primary goal to alleviate pain
  5. pulse frequencies less than 250 pulses per second
  6. pulse durations less than 1 millisecond
  7. any type of pulse pattern
- Any duration or regularity of treatment

MetaTENS\_SupplementaryAppendix\_FINAL\_23-12-2020

1  
2  
3 Actions:

4 Code gross reasons for Excluded into the master Excel file

5 Add to Table of Exclusion with reasons

6 Add to Table of Awaiting Classification with reasons  
7  
8

9 **C. Reasons for exclusion codes**

- 10 1. Unrelated to non-invasive electrical stimulation
- 11 2. Definitely not humans
- 12     a. TENS but definitely not humans
- 13 3. Definitely not adult patients with clinical condition
- 14     a. TENS but healthy humans
- 15     b. NOT adults (>18 years)
- 16 4. Definitely not RCT
- 17     a. TENS but definitely not RCT
- 18 5. Definitely not pain
- 19     a. TENS but definitely no pain outcomes
- 20     b. Not using intervention as treatment for pain (pain not main outcome measured)
- 21 6. Definitely not standard TENS
- 22     a. Not a standard TENS device (i.e. NMES/IFT/TEAS)
- 23     b. Not standard TENS electrodes
- 24     c. Not standard TENS electrical
- 25     d. Invasive technique
- 26 7. TENS on remote acupuncture points – none of the acupuncture points are at site of pain
- 27 8. Unable to isolate TENS effects
- 28     a. due to an integrated TENS + another modality device
- 29     b. due to combination therapy without a comparable combination therapy without TENS or
- 30     with a sham TENS
- 31 9. TENS treatment given pre-emptively before general anaesthesia surgery and pain recorded
- 32 postoperatively but TENS not given postoperatively whilst patient in pain
- 33 10. Other  
34  
35  
36  
37  
38  
39  
40  
41  
42  
43  
44  
45  
46  
47  
48  
49  
50  
51  
52  
53  
54  
55  
56  
57  
58  
59  
60

## Reviewer Aide memoire and Operational Checklist for Extracting Study Characteristics of study

- Study Design
  - Cross-over, parallel-group,
- Setting
- Study duration
- Methods of sequence generation and allocation concealment, blinding, intention-to-treat or per protocol analysis
- Study Participants
  - Age, gender
  - Pain diagnosis, duration of pain and symptoms
- Sample size
- Active and comparator groups
  - TENS
    - Type of TENS device (e.g. standard or 'TENS-like')
    - Electrode placement
    - Electrical characteristics of TENS (pulse frequency, waveform, amplitude/intensity, duration)
    - Dosage (treatment time and frequency)
    - Setting (where TENS was applied and by whom)
    - Adverse effects
  - Comparison group(s)
    - Type
    - Method of delivery (e.g. if placebo TENS then details of electrode placement, characteristics of placebo TENS (pulse frequency, waveform, amplitude/intensity, duration)
    - Dosage (treatment time and frequency)
    - Setting (where it was applied and by whom)
    - Adverse effects
- Concomitant treatments
  - Pharmacological and non-pharmacological
- Outcomes
  - Type
  - Time points used, including follow-up
  - Withdrawals
  - Adverse and serious adverse effects
  - Other
- Sponsorship, country of origin, conflict of interest statements.

### Methods to Assess Risk of bias

#### Description of operational approaches to assess risk of bias in included studies

Two review authors (CAP and MIJ) independently assessed risk of bias for each study against criteria outlined in the Cochrane Handbook for Systematic Reviews of Interventions for selection bias, performance and detection bias, attrition bias, reporting bias<sup>11</sup>. In addition, we assessed the risk of bias associated with the sample size of the primary TENS comparison trial arm, and whether sample size had been determined *a priori*.

We developed an aide memoire adapted for use with TENS to facilitate consistency in the decision-making process.

### **Selection bias**

This includes random allocation sequence generation and allocation concealment. We *excluded* studies that used a non-random process such as odd or even date of birth; hospital or clinic record number (i.e. quasi-randomised). We awarded high risk when there was no attempt to conceal treatment allocation or when allocation was breached (e.g. open list)

### **Performance bias**

There is a longstanding debate about the fidelity of blinding participants and therapists in studies of TENS, impacting on judgements related to the risk of performance bias. Cochrane criteria for judging performance bias is problematic because judgment is an amalgamation of two items, i.e. blinding of participants and blinding of personnel (e.g. therapist). We decided to assess blinding of participants and personnel (therapists) separately.

We argue that blinding of participants is the critical item. It is not possible to blind participants to TENS sensation. It is, however, possible to create uncertainty as to whether a real or fake treatment intervention has been received by informing participants that some types of electrical stimulation devices do not produce sensation during stimulation (e.g. microcurrent therapy), thus creating doubt about the necessity of electrical paraesthesiae during treatment (for detailed discussions see <sup>6,8</sup>).

We operationalised decisions about performance bias for *participants* as follows:

- Low risk of performance bias if the report provided a description of an attempt to blind participants (or create uncertainty about active intervention) using a placebo device, with no indication that such blinding was compromised. Thus, we categorised all RCTs that administered placebo TENS using a sham device that was identical in appearance to the active TENS intervention as low risk, providing there was sufficient operational details in the report to assure us there was sufficient operational details in the report to assure us that blinding had not been compromised. Likewise, we categorise all RCTs that compared two active TENS interventions as low risk if devices were identical in appearance and there were sufficient operational details in the report to assure us that blinding had not been compromised.
- We awarded a high risk of bias if the report stated that participants were not blinded (or blinding was clearly compromised) or if interventions were clearly different (e.g. TENS versus exercise).
- We awarded unclear bias to all other permutations

We operationalised decisions about performance bias for *personnel* (e.g. therapists/researchers) as follows:

- Low risk of performance bias if the report provided a description of an attempt to blind personnel to the control intervention (including a placebo device), with no indication that such blinding was compromised. We only categorised RCTs that administered placebo TENS using a sham device as low risk if there were sufficient operational details in the report to assure us that blinding not been compromised – a sham TENS device identical in appearance to the active TENS intervention would be insufficient – there would need to be additional procedural information relating to blinding of personnel. Likewise, we categorise all RCTs that compared two active TENS interventions as low risk if devices were identical in appearance and there were sufficient operational details in the report to assure us that blinding had not been compromised.

- We awarded a high risk of bias if the report stated that personnel were not blinded (or blinding was clearly compromised) or if interventions were clearly different (e.g. TENS versus exercise).
- We awarded unclear bias to all other permutations; insufficient information to permit judgement of low/high risk of bias

We operationalised decisions about performance bias for assessor (*detection bias*) as follows:

- Low risk of bias – stated that outcome assessor blinded to participants' allocated intervention and unlikely that blinding broken (i.e. different personnel to that allocating and/or treating participants)
- Unclear risk of bias - insufficient information to permit judgement of low/high risk of bias
- High risk of bias - outcome assessor (including 'participants' with respect to self-report outcomes) un-blinded to participants' allocated intervention OR outcome assessor blinded to allocated intervention but likely that blinding was broken

Blinding can be monitored by asking participants about the plausibility and credibility of treatment e.g. '... do you believe the device (either fake or real) was functioning properly?'<sup>10</sup>. There were very few studies that monitored blinding.

#### **Attrition bias**

We awarded low risk of bias for incomplete outcome data (attrition bias) if it was reported that all participants completed the study with no missing outcome data or missing outcome data was balanced across the groups with similar reasons for loss.

#### **Reporting bias**

We awarded low risk of selective reporting (reporting bias) to RCTs that faithfully reported an analysis of data in the Results section from a description of prespecified outcomes in the Methods and/or had previously published a protocol registered on ClinicalTrials.gov and described any deviations from protocol.

#### **Sample size**

The influence of small study samples was assessed using the risk of bias criterion 'Sample size' according to numbers of participants analysed in the TENS trial arm. We awarded low risk of bias for sample size if the number of participants receiving TENS in the primary comparison trial arm exceeded 199 and awarded a high risk if it was below 50 participants.

#### **Statement that sample size was estimated a priori**

We awarded a low risk of bias if the trial report included a statement and some detail that investigators estimated sample size a priori. We did not attempt to check the validity of power calculations.



## Reviewer Aide Memoire and Operational Checklist for Assessment of Risk of Bias

- Random allocation sequence generation (checking for possible selection bias)
  - Low risk of bias - any truly random process, e.g. random number table; computer random number generator
  - Unclear risk of bias - method used to generate sequence not clearly stated
  - High risk of bias - non-random component in the sequence generation process or non-random approaches

Note: We will exclude studies using a non-random process such as odd or even date of birth; hospital or clinic record number
- Allocation concealment (checking for possible selection bias)
  - Low risk of bias - e.g. telephone or central randomization; consecutively numbered, sealed, opaque envelopes
  - Unclear risk of bias - method not clearly stated
  - High risk of bias - studies that do not conceal allocation (e.g. open list)
- Blinding of participants and blinding of personnel (performance bias)
 

Note: Cochrane criteria for judging performance bias is problematic because judgment is an amalgamation of two items, i.e. blinding of participants and blinding of personnel (e.g. therapist). We will assess these two items separately.

### Blinding of participants

- Low risk - report provided a description of an attempt to blind participants (or create uncertainty about active intervention) using a placebo device, with no indication that such blinding was compromised.
  - Placebo TENS device identical in appearance to the active TENS intervention, providing there was sufficient operational details in the report to assure us that blinding had not been compromised.
  - Likewise, we categorise all RCTs that compared two active TENS interventions as low risk if devices were identical in appearance and there were sufficient operational details in the report to assure us that blinding had not been compromised.
- High risk - the report stated that participants were not blinded (or blinding was clearly compromised) or if interventions were clearly different (e.g. TENS versus exercise).
- Unclear bias to all other permutations

### Blinding personnel (e.g. therapists/researchers) as follows:

- Low risk - description of an attempt to blind personnel to the control intervention (including a placebo device), with no indication that such blinding was compromised. We only categorised RCTs that administered placebo TENS using a sham device as low risk if there were sufficient operational details in the report to assure us that blinding not been compromised – a sham TENS device identical in appearance to the active TENS intervention would be insufficient – there would need to be additional procedural information relating to blinding of personnel. Likewise, we categorise all RCTs that compared two active TENS interventions as low risk if devices were identical in appearance and there were sufficient operational details in the report to assure us that blinding had not been compromised.
- High risk - if the report stated that personnel were not blinded (or blinding was clearly compromised) or if interventions were clearly different (e.g. TENS versus exercise).



- Unclear risk - all other permutations; insufficient information to permit judgement of low/high risk of bias
- Blinding of assessor (*detection bias*)
  - Low risk of bias – stated that outcome assessor blinded to participants' allocated intervention and unlikely that blinding broken (i.e. different personnel to that allocating and/or treating participants)
  - Unclear risk of bias - insufficient information to permit judgement of low/high risk of bias
  - High risk of bias - outcome assessor (including 'participants' with respect to self-report outcomes) un-blinded to participants' allocated intervention OR outcome assessor blinded to allocated intervention but likely that blinding was broken
- Incomplete outcome data (drop-outs)
  - Low risk of bias < 20% drop-out and appears to be random with numbers per group provided along with reasons for drop-out, e.g. full data set
  - Unclear risk of bias - < 20% and unclear if random with numbers per group and reasons for drop-out not described
  - High risk of bias -  $\geq 20\%$  drop-out
- Incomplete outcome data (protocol violations)
  - Low risk of bias - if participants were analysed in the group to which they were originally assigned
  - Unclear risk of bias - where insufficient information is provided to determine if analysis was per protocol or intention-to-treat
  - High risk of bias - where per protocol analysis was used, where available data were not analysed, or participants' data were included in the group to which they were not originally assigned
- Selective reporting
  - Low risk of bias - study protocol was available matched Results reported; all pre-specified outcomes were reported in Methods and reported in Results even if study protocol not published
  - Unclear risk of bias - inadequate information to allow judgement of a study to be classified as 'low risk' or 'high risk'
  - High risk of bias - incomplete reporting of specified outcomes. One or more primary outcomes are reported using measurements or analysis that was not pre-specified. One or more of the primary outcomes was not pre-specified. One or more outcomes of interest were reported incompletely and could not be entered into meta-analysis. Results for a key outcome expected to be reported were excluded
- Size of study (checking for biases confounded by small size)
  - Low risk of bias  $\geq 200$  participants per treatment arm
  - Unclear risk of bias - 50 to 199 participants per treatment arm
  - High risk of bias < 50 participants per treatment arm
- Estimation of sample size
  - Low risk of bias – statement that estimation made, even if the actual calculation not present
  - Unclear risk of bias – N/A
  - High risk of bias – No statement
- Other sources of bias

- Consider other factors including whether studies were stopped early, there were differences between groups at baseline, the timing of outcome measurement, co-intervention comparability, and funding declarations

### RANDOM SEQUENCE GENERATION

Selection bias (biased allocation to interventions) due to inadequate generation of a randomised sequence.

Criteria for a judgement of 'Low risk' of bias.

The investigators describe a random component in the sequence generation process such as:

- Referring to a random number table;
- Using a computer random number generator;
- Coin tossing;
- Shuffling cards or envelopes;
- Throwing dice;
- Drawing of lots;
- Minimization\*.

\*Minimization may be implemented without a random element, and this is considered to be equivalent to being random.

Criteria for the judgement of 'High risk' of bias.

The investigators describe a non-random component in the sequence generation process. Usually, the description would involve some systematic, non-random approach, for example:

- Sequence generated by odd or even date of birth;
- Sequence generated by some rule based on date (or day) of admission;
- Sequence generated by some rule based on hospital or clinic record number.

Other non-random approaches happen much less frequently than the systematic approaches mentioned above and tend to be obvious. They usually involve judgement or some method of non-random categorization of participants, for example:

- Allocation by judgement of the clinician;
- Allocation by preference of the participant;
- Allocation based on the results of a laboratory test or a series of tests;
- Allocation by availability of the intervention.

Criteria for the judgement of 'Unclear risk' of bias.

Insufficient information about the sequence generation process to permit judgement of 'Low risk' or 'High risk'.

### ALLOCATION CONCEALMENT

Selection bias (biased allocation to interventions) due to inadequate concealment of allocations prior to assignment.

Criteria for a judgement of 'Low risk' of bias.

Participants and investigators enrolling participants could not foresee assignment because one of the following, or an equivalent method, was used to conceal allocation:

- Central allocation (including telephone, web-based and pharmacy-controlled randomization);
- Sequentially numbered drug containers of identical appearance;
- Sequentially numbered, opaque, sealed envelopes.

Criteria for the judgement of 'High risk' of bias.

Participants or investigators enrolling participants could possibly foresee assignments and thus introduce selection bias, such as allocation based on:

- Using an open random allocation schedule (e.g. a list of random numbers);
- Assignment envelopes were used without appropriate safeguards (e.g. if envelopes were unsealed or nonopaque or not sequentially numbered);
- Alternation or rotation;
- Date of birth;
- Case record number;
- Any other explicitly unconcealed procedure

Criteria for the judgement of 'Unclear risk' of bias.

Insufficient information to permit judgement of 'Low risk' or 'High risk'. This is usually the case if the method of concealment is not described or not described in sufficient detail to allow a definite judgement – for example if the use of assignment envelopes is described, but it remains unclear whether envelopes were sequentially numbered, opaque and sealed.

## BLINDING OF PARTICIPANTS

Performance bias due to knowledge of the allocated interventions by participants and personnel during the study.

Criteria for a judgement of 'Low risk' of bias.

Any one of the following:

- No blinding or incomplete blinding, but the review authors judge that the outcome is not likely to be influenced by lack of blinding;
- Blinding of participants and key study personnel ensured, and unlikely that the blinding could have been broken.

*Low = Statement blinded and no reason to suggest blinding seriously compromised; or blinding inferred, operational process described and no reason to suggest blinding seriously compromised*

Criteria for the judgement of 'High risk' of bias.

Any one of the following:

- No blinding or incomplete blinding, and the outcome is likely to be influenced by lack of blinding;

|                                                                                  |                                                                                                                                                                                                                                                                                                                                                                                                    |
|----------------------------------------------------------------------------------|----------------------------------------------------------------------------------------------------------------------------------------------------------------------------------------------------------------------------------------------------------------------------------------------------------------------------------------------------------------------------------------------------|
| <p>1</p> <p>2</p> <p>3</p> <p>4</p> <p>5</p> <p>6</p> <p>7</p> <p>8</p> <p>9</p> | <ul style="list-style-type: none"> <li>Blinding of key study participants and personnel attempted, but likely that the blinding could have been broken, and the outcome is likely to be influenced by lack of blinding.</li> </ul>                                                                                                                                                                 |
| <p>10</p> <p>11</p> <p>12</p> <p>13</p> <p>14</p> <p>15</p> <p>16</p> <p>17</p>  | <p><i>High = Statement that not blinded; or statements suggesting definitely not blinded</i></p> <p>Any one of the following:</p> <ul style="list-style-type: none"> <li>Insufficient information to permit judgement of 'Low risk' or 'High risk';</li> <li>The study did not address this outcome.</li> </ul> <p><i>Unclear = No statement; or blinding inferred but not directly stated</i></p> |

### BLINDING OF PERSONNEL

Performance bias due to knowledge of the allocated interventions by participants and personnel during the study.

|                                                                                                                         |                                                                                                                                                                                                                                                                                                                                                                                                                                                                                                                                                               |
|-------------------------------------------------------------------------------------------------------------------------|---------------------------------------------------------------------------------------------------------------------------------------------------------------------------------------------------------------------------------------------------------------------------------------------------------------------------------------------------------------------------------------------------------------------------------------------------------------------------------------------------------------------------------------------------------------|
| <p>24</p> <p>25</p> <p>26</p> <p>27</p> <p>28</p> <p>29</p> <p>30</p> <p>31</p> <p>32</p> <p>33</p> <p>34</p> <p>35</p> | <p>Any one of the following:</p> <ul style="list-style-type: none"> <li>No blinding or incomplete blinding, but the review authors judge that the outcome is not likely to be influenced by lack of blinding;</li> <li>Blinding of participants and key study personnel ensured, and unlikely that the blinding could have been broken.</li> </ul> <p><i>Low = Statement blinded and no reason to suggest blinding seriously compromised; or blinding inferred, operational process described and no reason to suggest blinding seriously compromised</i></p> |
| <p>36</p> <p>37</p> <p>38</p> <p>39</p> <p>40</p> <p>41</p> <p>42</p> <p>43</p> <p>44</p> <p>45</p> <p>46</p>           | <p>Any one of the following:</p> <ul style="list-style-type: none"> <li>No blinding or incomplete blinding, and the outcome is likely to be influenced by lack of blinding;</li> <li>Blinding of key study participants and personnel attempted, but likely that the blinding could have been broken, and the outcome is likely to be influenced by lack of blinding.</li> </ul> <p><i>High = Statement that not blinded; or statements suggesting definitely not blinded</i></p>                                                                             |
| <p>47</p> <p>48</p> <p>49</p> <p>50</p> <p>51</p> <p>52</p> <p>53</p> <p>54</p>                                         | <p>Any one of the following:</p> <ul style="list-style-type: none"> <li>Insufficient information to permit judgement of 'Low risk' or 'High risk';</li> <li>The study did not address this outcome.</li> </ul> <p><i>Unclear = No statement; or blinding inferred but not directly stated</i></p>                                                                                                                                                                                                                                                             |

### BLINDING OF OUTCOME ASSESSMENT

Detection bias due to knowledge of the allocated interventions by outcome assessors.

1  
2  
3  
4  
5  
6  
7  
8  
9  
10  
11  
12  
13  
14  
15  
16  
17  
18  
19  
20  
21  
22  
23  
24  
25  
26  
27  
28  
29  
30  
31  
32  
33  
34  
35  
36  
37  
38  
39  
40  
41  
42  
43  
44  
45  
46  
47  
48  
49  
50  
51  
52  
53  
54  
55  
56  
57  
58  
59  
60

Criteria for a judgement of 'Low risk' of bias.

Any one of the following:

- No blinding of outcome assessment, but the review authors judge that the outcome measurement is not likely to be influenced by lack of blinding;
- Blinding of outcome assessment ensured, and unlikely that the blinding could have been broken.

*Low = Statement blinded and no reason to suggest blinding seriously compromised; or blinding inferred, operational process described and no reason to suggest blinding seriously compromised*

Criteria for the judgement of 'High risk' of bias.

Any one of the following:

- No blinding of outcome assessment, and the outcome measurement is likely to be influenced by lack of blinding;
- Blinding of outcome assessment, but likely that the blinding could have been broken, and the outcome measurement is likely to be influenced by lack of blinding.

*High = Statement that not blinded; or statements suggesting definitely not blinded*

Criteria for the judgement of 'Unclear risk' of bias.

Any one of the following:

- Insufficient information to permit judgement of 'Low risk' or 'High risk';
- The study did not address this outcome.

*Unclear = No statement; or blinding inferred but not directly stated*

#### INCOMPLETE OUTCOME DATA

Attrition bias due to amount, nature or handling of incomplete outcome data.

Criteria for a judgement of 'Low risk' of bias.

Any one of the following:

- No missing outcome data;
- Reasons for missing outcome data unlikely to be related to true outcome (for survival data, censoring unlikely to be introducing bias);
- Missing outcome data balanced in numbers across intervention groups, with similar reasons for missing data across groups;
- For dichotomous outcome data, the proportion of missing outcomes compared with observed event risk not enough to have a clinically relevant impact on the intervention effect estimate;
- For continuous outcome data, plausible effect size (difference in means or standardized difference in means) among missing outcomes not enough to have a clinically relevant impact on observed effect size;
- Missing data have been imputed using appropriate methods.

Criteria for the judgement of 'High risk' of bias.

Any one of the following:

- Reason for missing outcome data likely to be related to true outcome, with either imbalance in numbers or reasons for missing data across intervention groups;
- For dichotomous outcome data, the proportion of missing outcomes compared with observed event risk enough to induce clinically relevant bias in intervention effect estimate;
- For continuous outcome data, plausible effect size (difference in means or standardized difference in means) among missing outcomes enough to induce clinically relevant bias in observed effect size;
- 'As-treated' analysis done with substantial departure of the intervention received from that assigned at randomization;
- Potentially inappropriate application of simple imputation.

Criteria for the judgement of 'Unclear risk' of bias.

Any one of the following:

- Insufficient reporting of attrition/exclusions to permit judgement of 'Low risk' or 'High risk' (e.g. number randomized not stated, no reasons for missing data provided);
- The study did not address this outcome.

## SELECTIVE REPORTING

Reporting bias due to selective outcome reporting.

Criteria for a judgement of 'Low risk' of bias.

Any of the following:

- The study protocol is available and all of the study's pre-specified (primary and secondary) outcomes that are of interest in the review have been reported in the pre-specified way;
- The study protocol is not available, but it is clear that the published reports include all expected outcomes, including those that were pre-specified (convincing text of this nature may be uncommon).

Criteria for the judgement of 'High risk' of bias.

Any one of the following:

- Not all of the study's pre-specified primary outcomes have been reported;
- One or more primary outcomes is reported using measurements, analysis methods or subsets of the data (e.g. subscales) that were not pre-specified;
- One or more reported primary outcomes were not pre-specified (unless clear justification for their reporting is provided, such as an unexpected adverse effect);

|                                                       |                                                                                                                                                                                                                                                                                                                                                                                                                                                                                                        |
|-------------------------------------------------------|--------------------------------------------------------------------------------------------------------------------------------------------------------------------------------------------------------------------------------------------------------------------------------------------------------------------------------------------------------------------------------------------------------------------------------------------------------------------------------------------------------|
|                                                       | <ul style="list-style-type: none"> <li>• One or more outcomes of interest in the review are reported incompletely so that they cannot be entered in a meta-analysis;</li> <li>• The study report fails to include results for a key outcome that would be expected to have been reported for such a study.</li> </ul>                                                                                                                                                                                  |
| Criteria for the judgement of 'Unclear risk' of bias. | <p>Insufficient information to permit judgement of 'Low risk' or 'High risk'. It is likely that the majority of studies will fall into this category.</p> <p><i>Insufficient information to permit judgement of 'Low risk' or 'High risk' as study protocol is not available, and/or suspected study's primary and secondary outcomes were not pre-specified and/or one or more outcomes of interest in the review are reported incompletely so that they cannot be entered in a meta-analysis</i></p> |

### SAMPLE SIZE

|                                                       |                                                                                                   |
|-------------------------------------------------------|---------------------------------------------------------------------------------------------------|
| Criteria for a judgement of 'Low risk' of bias.       | <i>Sample size <math>\geq 200</math> participants in trial arm of the primary TENS comparison</i> |
| Criteria for the judgement of 'High risk' of bias.    | <i>Sample size <math>&lt; 50</math> participants in trial arm of the primary TENS comparison</i>  |
| Criteria for the judgement of 'Unclear risk' of bias. | <i>Sample size = 50-199 participants in trial arm of the primary TENS comparison</i>              |

### SAMPLE SIZE CALCULATION

|                                                       |                                                                                                                                                                                                                                                                                                                                                   |
|-------------------------------------------------------|---------------------------------------------------------------------------------------------------------------------------------------------------------------------------------------------------------------------------------------------------------------------------------------------------------------------------------------------------|
| Criteria for a judgement of 'Low risk' of bias.       | <p>Sample size calculation performed following the CONSORT guidelines. (Moher et al., 2012)</p> <p><i>Low Risk = Statement in report that sample size estimated and/or a calculation performed, and no reason suspect that estimation method and/or calculation was incorrect from information in report</i></p>                                  |
| Criteria for the judgement of 'High risk' of bias.    | <p>No sample size calculation reported.</p> <p><i>High Risk = No statement in report that sample size estimated and/or a calculation performed; or stated in report that sample size estimated and/or a calculation performed, but information in report provided clear evidence that estimation method and/or calculation was incorrect.</i></p> |
| Criteria for the judgement of 'Unclear risk' of bias. | <p>Sample size calculation performed, but lack of information provided.</p> <p><i>Unclear Risk = Stated in report that sample size estimated and/or a calculation performed, but lack of information provided.</i></p>                                                                                                                            |

### CROSSOVER EFFECT



Reporting bias due to carryover in crossover studies

|                                                       |                                                                                                                                                              |
|-------------------------------------------------------|--------------------------------------------------------------------------------------------------------------------------------------------------------------|
| Criteria for a judgement of 'Low risk' of bias.       | Order of receiving intervention was randomized, presence of a wash-out period clearly stated, other measures clearly stated to control for crossover effect. |
| Criteria for the judgement of 'High risk' of bias.    | Order of receiving intervention not randomized, presence of a wash-out period not stated, nor measures taken to control for crossover effects.               |
| Criteria for the judgement of 'Unclear risk' of bias. | Insufficient information to permit judgement of low/high risk of bias.                                                                                       |

Figure A1 Risk of bias criteria.

For peer review only

## Measures and Analysis of treatment effect

### Evaluation of Pain Outcomes: Description of principles and operational procedures

Pain outcomes tend to have a U-shaped distribution with some patients experiencing substantial reductions in pain and others experiencing minimal or no improvement<sup>12</sup>, so average data may be misleading because small average between-group effect sizes may represent a proportion of participants that responded well to the intervention<sup>13</sup>. Thus, we set responder rate as a primary outcome. The Outcome Measures in Rheumatology (OMERACT 12)<sup>14</sup> group states that the proportion of patients achieving one or more thresholds of improvement from baseline pain should be reported in addition to mean change. We followed the Initiative on Methods, Measurement, and Pain Assessment in Clinical Trials (IMMPACT) definitions when analysing response to treatment and consider reports of pain relief of 30% or greater compared to baseline as responders<sup>15</sup>.

#### Primary Pain Outcomes

*Proportion of participant-reported pain relief of  $\geq 30\%$  expressed as frequency (dichotomous) data*

Our primary outcome was responder rate. The proportion of participants reporting a reduction in pain intensity of 30% or greater (i.e. at least moderate pain relief) compared with baseline in each group was classed as responders<sup>12,13</sup>. We calculated risk ratio (RR) with 95% confidence intervals (CI). Comparisons between groups were finalised by calculating the number needed to treat to benefit (NNTB) as an absolute measure of treatment effect where possible<sup>15</sup>.

*Participant-reported pain intensity expressed as mean (continuous) data*

We predicted that most RCTs in our review would present effect sizes as the average between intervention groups. We calculated standardised mean difference (SMD) with 95% CI because continuous data was collected on different scales (i.e. both VAS and NRS). We used a between-group difference of  $\geq 10$  mm on a 0 to 100 mm VAS for minimally important outcome for pain intensity in-line with IMMPACT criteria for clinically important change, as previously used in Cochrane reviews, where no important change  $< 15\%$ , minimally important change  $15\% > 30\%$ , moderately important change  $30\% > 50\%$  and substantially important change  $\geq 50\%$ <sup>15</sup>. We planned to interpret these findings with caution as it remains possible that estimates that fall close to this point may reflect a treatment that benefits an appreciable number of patients.

We used 'Rules of thumb' for interpreting SMD effect sizes as follows<sup>3,16</sup>:

- $< 0.4$  = small effect
- $0.4 < 0.8$  = moderate effect
- $\geq 0.8$  a large effect

We were mindful that interpretations of this nature can be problematic due a variety of factors including settings and context in which pain was evaluated.

#### Secondary Pain Outcomes

We identified the proportion of participants reporting a reduction in pain intensity of 50% or greater (i.e. at least substantial pain relief) as a secondary outcome. In addition, we planned to analyse the frequency of adverse events using the same procedures described for dichotomous and continuous data for primary outcomes.

### Evaluation of Adverse Events: Description of principles and operational procedures

For adverse events, we took an exploratory approach 'through opportunistic capture of any adverse effects that happen to be reported' rather than a bespoke search of wider sources<sup>17</sup>. We used the Cochrane Collaboration's definition of adverse event as "... an unfavourable or harmful outcome that occurs during, or after, the use of a drug or other intervention, but is not necessarily caused by it, and an adverse effect (or harm) as an adverse event for which the causal relation between the

1  
2  
3 *intervention and the event is at least a reasonable possibility”*<sup>17</sup>. Serious adverse events were  
4 defined as untoward medical occurrence or effect resulting in death, threat to life, hospitalisation,  
5 significant disability or incapacity, congenital anomaly or birth defect. We extracted data for adverse  
6 effects of any type or severity as descriptions from participants and number of withdrawals and/or  
7 stopping of treatment.  
8  
9

10 We conducted a descriptive analysis and calculated relative risk by extracting and pooling data for  
11 meta-analysis. We only extracted data as ‘zero’ when the RCT report included numerical data for the  
12 presence of at least one adverse event in one of the trial arms and clearly stated that no adverse  
13 events had occurred in the other trial arm(s).  
14

### 15 **Unit of analysis issues**

16 We included crossover designs and planned to only enter data from the first period into the meta-  
17 analysis unless trial authors argued convincingly that there was sufficient washout between  
18 interventions to eliminate contamination. If this was not the case, we planned to note this and  
19 would not include the data.  
20  
21

22 There was sufficient washout between interventions to eliminate contamination for all cross trials.  
23 For simplicity we analysed crossover data as if parallel group in line with analytical processes  
24 undertaken by the trial authors. Analysing crossover data as if parallel group, normally requires  
25 generic inverse variance to correct for correlation between groups using the same participants  
26 (paired data), but we argue that has negligible impact on outcome because generic inverse variance  
27 increases confidence intervals and this will be negated by the influence of the overwhelming number  
28 of data points from parallel group studies.  
29  
30

### 31 **Dealing with missing data**

32 An intention-to-treat (ITT) analysis was used when the ITT population were randomised, received  
33 at least one dose of TENS, and provided at least one post-baseline outcome measurement. Missing  
34 participants were assigned zero improvement wherever possible.  
35  
36

### 37 **Data synthesis**

38 We used Review Manager 5.3 to pool data and undertake meta-analyses. We grouped data  
39 according to outcome and measurement time points prioritising pain at rest at the last during TENS  
40 (whilst TENS was switched on) or the first measurement time point immediately after TENS had been  
41 switched off. When TENS was applied on more than one occasion as a course of treatment, we  
42 selected a measurement time point that was clinically rational, such as the last treatment session  
43 and / or as close to an event that precipitated pain (e.g. trauma, operative procedure).  
44  
45  
46  
47  
48  
49  
50  
51  
52  
53  
54  
55  
56  
57  
58  
59  
60

### Assessment of heterogeneity

We examined heterogeneity using visual inspection of forest plots, the  $I^2$  statistic and the Chi<sup>2</sup> test<sup>18</sup>. We used the Cochrane Collaboration's rough guide to interpretation and graded heterogeneity as:

- Not important ( $I^2 = 0\%$  to  $40\%$ )
- Moderate ( $I^2 = 30\%$  to  $60\%$ )
- Substantial ( $I^2 = 50\%$  to  $90\%$ )
- Considerable ( $I^2 = 75\%$  to  $100\%$ ).

Heterogeneity issues likely at play were:

- Methodological heterogeneity, associated with trial design
- Clinical heterogeneity, associated with pain
- Intervention (treatment) heterogeneity, associated with TENS and comparators

We conducted subgroup and sensitivity analyses to explore heterogeneity further.

#### Subgroup Analyses: Descriptions of the principles and operational procedures

We pre-specified the following subgroup analyses to investigate sources of heterogeneity and/or estimate treatment effects patient subgroups:

- Type of pain: acute pain, chronic pain, and specific painful conditions
- TENS technique: Optimal intensity described as at least 'strong'; Sub-optimal intensity described as 'barely perceptible', 'faint', or 'mild'; Conventional TENS (high frequency TENS), acupuncture-like TENS (Low frequency TENS)
- TENS dosage: Single TENS treatment, Multiple TENS treatments, use as often as needed
- Measurement time point: during TENS (whilst switched on), after TENS (whilst switched off)
- Contamination from concurrent treatment: TENS administered as a sole treatment, TENS administered in combination with medication, TENS administered in combination with non-pharmacological treatments

It became apparent during screening and data extraction that some pre-specified subgroup analyses would not be possible and/or meaningless.

We refined our pre-specified subgroup analyses as follows:

- Methodological heterogeneity, associated with trial design
  - We conducted subgroup analysis to explore overall risk of bias, number of participants in the primary TENS group.
- Clinical heterogeneity, associated with pain
  - We conducted subgroup analysis to explore duration of pain (acute vs chronic), diagnostic descriptors (pain conditions), mechanistic descriptors (nociceptive or neuropathic), and structures involved (systems, organs and tissues).
- Intervention (treatment) heterogeneity, associated with TENS and comparators
  - Our eligibility criteria resulted in the inclusion of RCTs that had optimised TENS intervention in terms of generating a strong non-painful TENS sensation at (or close to) the site of pain, irrespective of variations in electrical characteristics of currents produced by a 'standard TENS device'. Thus, RCTs that did not optimise the delivery of TENS using currents administered at (or close to) the site of pain at intensities that were above sensory detection threshold were excluded rendering a subgroup analysis of optimal versus suboptimal intensity or site of stimulation impossible. We plan to undertake such an analysis by comparing RCTs excluded on this basis

1  
2  
3 with those included in this review in the future. Unclear, inconsistent and  
4 inaccurate terminology and the omission of important detail in trial reports  
5 rendered subgroup analyses of conventional TENS versus acupuncture-like TENS,  
6 and contamination from concurrent treatments meaningless. Such issues would  
7 affect the fidelity of subgroup analyses of outcomes at different measurement time  
8 points and at following up and therefore we have postponed this analysis until the  
9 future.  
10

11  
12 There was insufficient data to undertake subgroup analyses for high frequency versus low frequency  
13 TENS for any comparison  
14

15 There were sufficient RCTs to undertake a head-to-head comparison of high versus low frequency  
16 TENS for pain intensity (continuous data).  
17

### 18 **Subgroup analyses: Interpreting the findings**

19 We followed guidance from Richardson<sup>19</sup> when interpreting subgroup analyses using the following  
20 criteria  
21

- 22 • Criteria 1: report whether a statistically significant subgroup difference (interaction) was  
23 detected
- 24 • Criteria 2: consider the covariate distribution (i.e. the number of trials and participants  
25 contributing to each subgroup)
- 26 • Criteria 3: consider the plausibility of the interaction or lack of interaction
- 27 • Criteria 4: consider the importance of the interaction or lack of interaction
- 28 • Criteria 5: consider the possibility of confounding

29 We considered a p-value of less than 0.1 from the test for subgroup differences to indicate a  
30 statistically significant difference between the pooled effect estimates for each subgroup (i.e. a  
31 subgroup effect (interaction). This indicates that the characteristic under consideration (i.e. the  
32 covariate) modifies treatment effect. We also noted whether the direction of each subgroup effect  
33 differed and favoured different treatments (i.e. qualitative) or whether the direction of each  
34 subgroup effect was the same for the treatment but of different sizes (i.e. quantitative). We also  
35 considered the extent to which individual trials differed in treatment effects within each subgroup  
36 (i.e. heterogeneity).  
37  
38

39 If heterogeneity within a subgroup was substantial/considerable, we conducted a further  
40 exploration of heterogeneity prior to drawing a conclusion about treatment effect within the  
41 subgroup. This included visual inspection of forest plots to evaluate the extent of heterogeneity  
42 within the subgroups and across all trials to determine whether the findings of the analyses are  
43 trustworthy, whilst acknowledging uncertainty from the inconsistency between individual trial  
44 findings.  
45  
46

### 47 **Reporting (Publication) Biases: Descriptions of operational procedures**

48 Publication bias was assessed using a method designed to detect the amount of unpublished data  
49 with a null effect required to make any result clinically irrelevant (usually taken to mean numbers  
50 needed to treat for benefit (NNTB) of 10<sup>20</sup>). The influence of small study samples was assessed using  
51 the risk of bias criterion 'Sample size' according to numbers of participants analysed in the TENS trial  
52 arm.  
53  
54

55 We visually inspected funnel plots to explore the likelihood of reporting bias if there were at least 10  
56 RCTs in a meta-analysis and if RCTs differed in sample size. Small study effects were analysed using  
57 Egger's regression test and the Trim and Fill method was used to analyse potential publication bias  
58  
59

1  
2  
3 for RCTs using continuous outcomes<sup>3</sup>. For Egger's regression test, the statistical significance was set  
4 at  $\leq 0.1$ .  
5  
6  
7  
8  
9  
10  
11  
12  
13  
14  
15  
16  
17  
18  
19  
20  
21  
22  
23  
24  
25  
26  
27  
28  
29  
30  
31  
32  
33  
34  
35  
36  
37  
38  
39  
40  
41  
42  
43  
44  
45  
46  
47  
48  
49  
50  
51  
52  
53  
54  
55  
56  
57  
58  
59  
60

For peer review only

**Quality of the evidence**

We considered single RCTs too imprecise, unless the trial arm sample size was greater than 200 participants for continuous data and greater than 150 events for dichotomous data. We considered pooled data to be imprecise if the sample size for a treatment arm was below than 500 participants.

We planned to present pooled effects for outcomes with GRADE judgements in 'Summary of findings' tables. Two review authors (MIJ and PGW) independently rated the quality of outcomes using the Grades of Recommendation, Assessment, Development and Evaluation (GRADE) system (GRADEpro GDT 2015, Supplementary material – S9). We decreased GRADE ratings as follows:

- Limitations to study quality - Serious (- 1) or very serious (- 2)
- Important inconsistency about directness - Some (- 1) or major (- 2)
- Imprecise or sparse data (- 1)
- High probability of reporting bias (- 1)

**Sensitivity analysis**

We analysed the effect of excluding RCTs with high risk of bias.



## RESULTS

### Results of the search

The initial search was conducted during July 2019 and identified 6188 potentially relevant records. There were 16 additional records identified through other sources. After removal of duplicates, we screened the titles and abstracts of 4256 records and obtained and read the full texts of 548 records. We excluded 168 records after screening the full text report, with 17 records awaiting classification. We included 348 records of 346 RCTs. Processing of these 346 RCTs (i.e. assessing risk of bias, extracting study characteristics and data, and analysis took 9 months.

We conducted an updated search on 17 May 2020 and identified an additional 1491 potentially relevant records. We removed duplicates and screened titles and abstracts and read the full texts of 75 records. We excluded 37 records after screening the full text report, and included additional 36 RCTs, with 2 records awaiting classification.

In total, our final analysis included 381 RCTs, with 19 RCTs awaiting classification.

### **Management of multiple records (secondary reports) of one RCT**

We categorised multiple records of one RCT as follows.

- An RCT with 1-year follow-up data of 70 patients<sup>21</sup> as the primary report and 3-month data of the first 23 patients<sup>22</sup> and 3-month data of 36 patients (presumably including the first 23 patients)<sup>23</sup> as secondary reports
- An RCT of TENS in addition to usual primary care management for the treatment of tennis elbow<sup>24</sup> as the primary report and an economic evaluation<sup>25</sup> as a secondary report
- An RCT evaluating TENS versus manual therapy for neck pain<sup>26</sup> reported as the primary report and a Spanish language version<sup>27</sup> as a secondary report
- The short-term results an RCT evaluating TENS for various chronic pains<sup>28</sup> as the primary report and an analysis to predict outcome of TENS from the RCT<sup>29</sup>, the long-term results of the RCT<sup>30</sup> and the findings of a pilot study investigating different mechanisms for short-term effects of TENS<sup>31</sup> as secondary reports
- An RCT evaluating TENS for knee osteoarthritis<sup>32</sup> as the primary report and outcomes associated with knee kinematics and kinetics<sup>33</sup> as a secondary report

### **Management of multiple samples within one report**

The following were described and analysed as distinct sample populations within one report of one RCT. We analysed data from these samples separately.

- Chia<sup>34</sup> conducted separate analyses for a sample of participants categorised as nulliparous and multiparous (n = 101) and a sample categorised as nulliparous only (n = 20)
- Kayman-Kose<sup>35</sup> conducted separate analyses for a sample of participants categorised as having a Caesarean section (n = 100) and a sample of participants categorised as having a Vaginal delivery (n = 100)

Finally,<sup>36</sup> reported the findings of an RCT of TENS for shoulder pain and<sup>37</sup> reported a similar RCT for chronic shoulder tendonitis. Inspection of reports revealed minor differences in protocols and data, so we categorised these as distinct RCTs with different sample populations.

Thus, we identified 383 distinct samples from 381 RCTs to be included in the review.

### **Management of errors detected in previous meta-analyses**

We conducted a search for systematic reviews on 01 July 2019 and identified 145 systematic reviews that had included RCTs to evaluate the effect of TENS on pain-related outcomes. Our descriptive analysis of systematic reviews found that:

- There were 32/145 Cochrane reviews and 113/145 non-Cochrane reviews
- The mean number of RCTs in a systematic review was 5.6 (maximum: 35; minimum: 1)
- The statements of conclusion in most systematic reviews tended toward inconclusive (70/145) or efficacious (51/145)

The findings of the preliminary descriptive analysis of systematic reviews were disseminated at the European Federation of Chapters of IASP Conference XI held in Valencia, Spain in September 2019.

We cross-checked data presented in meta-analyses of previously published systematic reviews with data extracted from RCTs included in our meta-TENS review. We found very few inconsistencies with data extracted and used in our meta-analysis. We corrected the following errors detected in previous meta-analyses

- double counts of samples from individual RCTs in pooled data (e.g. <sup>38-41</sup>)
- the extraction of the area under the curve for pain intensity instead of VAS 100 mm scale (e.g. (i.e. <sup>42</sup> for the RCT by <sup>43</sup>)

### **Description of reasons for excluding studies**

Primary reasons for excluding studies are provided in the online Table of Excluded Studies. Often studies were excluded for multiple violations of our inclusion criteria. At least 39 studies were excluded for not being an RCT.

### **Violations of criteria for 'standard TENS'**

The most common reason for exclusion were for violations of our *a priori* criteria for TENS (i.e. electrical characteristics, electrode placement sites, and type of devices; at least 90 studies). The following electrical stimulation techniques were excluded; Transcutaneous electric acupoint stimulation; Transcutaneous spinal electroanalgesia; Acupuncture-like stimulation delivered using a Codetron device; Supraorbital transcutaneous stimulation; Non-invasive interactive neurostimulation using an InterX5000 device); H-wave therapy; Neuromuscular electrical stimulation; Interferential current therapy; 5KHz sine wave currents; Microcurrent electrical stimulation; High voltage pulsed direct current; Frequency rhythmic electrical modulation; and Auto-targeted neurostimulation. Some of these techniques have been included in previous systematic reviews on TENS.

Some original trial authors mistakenly described a technique as 'TENS', despite on close inspection the electrical characteristics of currents did not match those associated with TENS. For example, reports by Itoh et al. state in the title of their report that they evaluated the effect of TENS for knee osteoarthritis <sup>44</sup> and chronic non-specific low back pain <sup>45</sup>. Inspection of the trial report reveals the characteristics of currents akin to interferential therapy "... a single-channel portable TENS unit (model HVF3000, OMRON Healthcare Co Ltd, Japan), which sends between two electrodes a premixed amplitude-modulated frequency of 122 Hz (beat frequency) generated by two medium frequency sinusoidal waves of 4.0 and 4.122 kHz (feed frequency)" <sup>45</sup> p23. RCTs by Itoh et al., have been previously included in a Cochrane review on osteoarthritis <sup>46</sup> and a non-Cochrane meta-analysis on low back pain <sup>47</sup>.

### **Violations of criteria for appropriate body site for TENS**

At least 20 studies were excluded for administering TENS to acupuncture points that we considered to be remote to the site of pain. Many of these studies evaluated transcutaneous electric acupoint stimulation (TEAS, TAES) in which stimulation was delivered to remote acupuncture points using

pulsed currents described as 'dense-disperse' using frequencies alternating between 2pps and 100pps. There was a subset of transcutaneous electric acupoint stimulation studies that administered stimulation as a one-off treatment before surgery (i.e. pre-emptive) for post-surgical pain. Some reports implied that transcutaneous electric acupoint stimulation may have been administered to regional acupuncture points but often details were unclear. For consistency, we decided to exclude all studies described as evaluating transcutaneous electric acupoint stimulation.

Four studies were excluded because they administered TENS to an internal body site, i.e. intravaginal<sup>48-50</sup> or intra-oral<sup>51</sup>.

#### **Violations of criteria for adult participants**

Four studies were excluded because they included at least one child under the age of 16 years<sup>52-55</sup>. We included RCTs by<sup>56, 57</sup> and<sup>58</sup> despite having a sample population with at least one participant no younger than 17 years of age, because the mean age of the sample suggested over 90% of participants were over 18 years of age.

We appreciate that including people under 18 can raise issues such as participants between 16-18 years can be included in paediatric studies which may have been missed by our search strategy. It was not possible to isolate the effects of TENS from other treatments given simultaneously or there was no suitable comparison group to assess the contribution of TENS to outcome in at least 17 studies.

#### **Studies Awaiting Classification**

There were 19 studies awaiting classification (Online Table of Studies Awaiting Classification) because we were unable to obtain full texts (n = 7 records) and we were unable to translate non-English language full text records (n = 12 records).

#### **Description of Included RCTs**

##### **Characteristics of included trials**

We included 381 RCTs at entry. A summary of the characteristics of included RCTs is provided in the Online Table of Included Studies and a summary of the conclusion for each RCT is provided the Online Table of RCT Authors' Conclusion.

##### *Study Design*

We identified 383 distinct population samples from 381 RCTs. There were 24532 participants at entry with the mean  $\pm$  SD study sample size being  $64.05 \pm 58.29$  participants (n=383 samples, maximum = 607<sup>59</sup>, minimum = 5<sup>60</sup>).

There were 10615 participants enrolled into the trial arm that we categorised as the primary TENS group, with the mean  $\pm$  SD primary TENS trial arm sample size being  $27.71 \pm 21.89$  participants (maximum = 144<sup>59</sup>; minimum = 5 participants<sup>60-64</sup>).

We categorised 334 RCTs as a parallel-group design, and 47 as crossover design. We categorised 270 RCTs as predominantly pragmatic (efficacious) in focus and 111 RCTs as predominantly explanatory (mechanistic) in focus.

There were 129 reports that stated that an estimation of sample size had been made *a priori*.

RCTs were conducted in 38 countries with the most frequent sample populations being from Turkey (56 RCTs), with high proportions of RCTs conducted in the USA (51 RCTs), Brazil (38 RCTs), UK (37 RCTs), and Sweden (27 RCTs).

### *Types of pain*

We categorised 162/383 samples of participants with acute pain, 176/383 samples of participants with chronic pain, and 10/383 samples as including participants with acute and chronic pain.

The category of pain was not reported for 35/383 samples of participants. We categorised samples of participants according to pain condition as follows:

- 95/383 as post-operative pain
- 37/383 as back pain (predominantly chronic low back pain)
- 32/383 as osteoarthritis (predominantly of the knee)
- 26/383 as labour pain
- 23/383 samples of participants with procedural pain
- 22/383 as non-specific musculoskeletal pain of the neck and/or shoulder
- 16/383 as dysmenorrhea
- 15/383 samples of participants with temporomandibular joint pain
- 12/383 samples of participants with myofascial pain
- 11/383 as various pain conditions
- 9/383 samples of participants with fibromyalgia
- 7/383 samples of participants with post stroke pain
- 7/383 samples of participants with rheumatoid arthritis

The remaining samples were from a variety of conditions including peripheral diabetic neuropathy (6 samples), spinal cord injury (5 samples), and neuralgias

There were 231/381 RCTs that had 2 comparison groups, 111/381 RCTs had 3 comparison groups, 29/381 RCTs had 4 comparison groups, 6/381 RCTs had 5 comparison groups, 3/381 RCTs had 6 comparison groups and 1/381 RCT had 12 comparison groups.

### *Contamination from Concurrent treatment*

Many reports described delivering TENS as if it was a sole treatment, although reports often revealed that participants could access other form of treatments including drug medication and or exercise. We categorised at least 216/383 samples as having access to other treatments whilst receiving TENS that may 'contaminate' estimates of TENS effects, although attempts were often made to standardise such access between comparison groups. Analgesic medication or exercise was available informally as part of ongoing standard of care (SoC) or formally as part of a combination treatment. Rescue medication was standardised and/or monitored and/or measured in some but not all RCTs. Generally, there was inadequate monitoring and or reporting of analgesic consumption and/or use other treatments associated with the primary TENS intervention.

### ***Characteristics of TENS interventions***

#### *Site of TENS in relation to painful site*

TENS was delivered at the site of pain for 376/383 samples, of which TENS was delivered to regional acupuncture points at the site of pain in 7/383 of these samples<sup>65-71</sup>.

TENS was not delivered to the site of pain in 3/383 samples. This was due to skin sensitivity and integrity at the site of pain painful diabetic neuropathy, so TENS was delivered to the lower back (dermatomal)<sup>60,72</sup>; and to the absence of a limb so TENS was delivered to the contralateral leg for phantom limb pain<sup>73</sup>.

There were 2 reports where the statement of the location of TENS was unclear<sup>74,75</sup>. There were 2/381 reports that did not state the location of TENS, although supplementary information within

1  
2  
3 these reports (e.g. descriptions of TENS in Introduction and/or Discussion sections) suggested that  
4 the location of TENS was appropriate and did not violate our inclusion criteria <sup>76,77</sup>.  
5

#### 6 *Intensity of TENS*

7 TENS was delivered at intensities that were strong and above sensory detection threshold to  
8 342/383 samples. There were 36/381 reports that did not state the intensity of TENS and 7/381  
9 descriptions that were unclear, supplementary information within these reports (e.g. current  
10 amplitude (mA), or descriptions of TENS in Introduction and/or Discussion sections) suggested that  
11 the intensity of TENS was appropriate and did not violate our inclusion criteria. It should be noted  
12 that our eligibility criteria biased our sample of RCTs towards those delivering TENS above sensory  
13 detection threshold.  
14  
15

#### 16 *Electrical Characteristics of TENS – Pulse Frequency*

17 The majority of RCT reports described the electrical characteristics of TENS. At face value, reporting  
18 appeared to be adequate yet extracting information proved challenging and the resulting  
19 categorisation of characteristics (variables) imprecise.  
20  
21

22 We categorised 363/383 samples as receiving TENS using electrical characteristics associated with  
23 standard TENS (i.e. pulsed electrical currents, see Methods). There were 9/383 reports that did not  
24 report the electrical characteristics of TENS and 11/383 reports where reporting was unclear,  
25 although supplementary information within these reports (e.g. device model) suggested that the  
26 electrical characteristics of TENS used did not violate our inclusion criteria.  
27  
28

29 There were 353/381 reports that included a numerical value for pulse frequency, and we were able  
30 to categorise 276/383 of the primary TENS samples as receiving HF TENS (>10 pps). It was less  
31 common for reports to include a statement of the pattern (mode) of pulse delivery. The nature of  
32 the design of TENS devices means that we can speculate that a continuous pattern of pulse delivery  
33 was used to deliver high frequency currents in most of these cases.  
34  
35

36 We categorised 35/383 samples as receiving low frequency TENS. Often reports did not distinguish  
37 between pulses per second and bursts per second when describing low frequency stimulation so it  
38 was not possible to ascertain whether low frequency TENS was administered using a continuous  
39 pattern of pulses delivered at a low frequency or as a burst pattern of pulses delivering low  
40 frequency bursts (trains) of high frequency pulses.  
41  
42

43 We categorised 17/383 samples as receiving TENS delivered by alternating (or switching) the pattern  
44 of stimulation between continuous to burst, as is often recommended for management of labour  
45 pain.  
46  
47

48 We categorised 9/383 samples as receiving alternating frequencies of TENS that used devices that  
49 were pre-programmed to intermittently switch between high and low and high frequency pulse  
50 delivery; 10/383 samples as receiving modulating frequency TENS; 2/383 samples as receiving  
51 random frequency TENS; and 6/383 samples as receiving various frequencies of TENS.  
52  
53

54 There were 28/381 reports that did not state the numerical pulse frequency of TENS used in the RCT.  
55 There were 109/381 reports that stated TENS was delivered at 100Hz; 43/381 reports that stated  
56 TENS was delivered at 80Hz; 8/381 reports that stated TENS was delivered at 4Hz; and 3/381 reports  
57 that stated TENS was delivered at 2Hz. The remaining reports stated more than one numerical value  
58 to describe the frequency of TENS (e.g. TENS was administered between upper and lower frequency  
59 boundaries). Participants in some RCTs were instructed to adjust the pulse frequency of TENS as  
60 needed.

Often, reports were unclear as to whether frequencies were pre-set and immovable or advisory starting frequencies on which to adjust according to need. Thus, characterisation of the numerical description of the frequency of TENS was imprecise.

There was inconsistency in the use of terms used to describe the type of TENS techniques. Terms used included conventional TENS, AL-TENS, brief intense TENS, high frequency TENS, low frequency TENS, acu-TENS.

#### *Adequacy of TENS intervention*

We categorised 336/383 of the primary TENS intervention as meeting all 3 criteria for adequacy: standard electrical characteristics, administered at an appropriate site relative to pain, and at intensities above sensory detection. There were 47/383 samples where there was uncertainty in at least one of these criteria, although overall, we judged the electrical characteristics of TENS used did not violate our inclusion criteria.

TENS regimens varied from single and multiple treatments of less than one minute duration for post-partum uterine contractions<sup>78</sup>, dysmenorrhea<sup>79</sup>, post-operative surgical abortion<sup>80</sup> or gynaecologic laparoscopic surgery<sup>81</sup> and brief procedural pains such as carboxytherapy<sup>82</sup> to multiple treatments of unspecified duration (e.g. self-administered home treatment for chronic pain as prn).

The longest duration of a course of TENS treatment was in a randomised double-blind evaluation of different types of electrical characteristics of TENS for chronic pain in which participants self-administered TENS until they no longer required TENS or up to a maximum of 2 years<sup>83</sup>. The trial authors concluded that there was no difference in efficacy between pulsed (burst at a low frequency) or continuous (high frequency) TENS.

#### ***Characteristics of Outcome Measures***

There were 352 of the 381 RCTs that recorded measurements related to our primary outcome, that used a VAS or some other pain continuous or ordinal scale. There were 29/381 RCTs that did not collect data related to our primary outcome measures, but all collected secondary outcome data related to pain, and were therefore included for review.

The most common secondary outcome measurements were analgesic consumption (127 RCTs), range of motion (52 RCTs), McGill Pain Questionnaire scores (both full and short-form versions, 26 RCTs), tenderness via pressure algometry (23 RCTs), WOMAC scores (14 RCTs), Quality of Life (12 RCTs) Roland Morris Disability Questionnaire scores (8 RCTs).



### **Overall Risk of Bias**

Methodological details were superficial and unclear in many reports resulting in unclear RoB assessments. No studies were judged to have a low risk of bias across all 9 RoB items. There were 3/381 RCTs judged to have a low risk of bias across 8 of the 9 items, with unclear or high risk due to low sample sizes<sup>84-86</sup>. There were 9/381 RCTs with 7 or more items judged as low RoB<sup>84-91</sup> and 26/381 RCTs with 6 or more items as low RoB.

We categorised many RCTs as having an unclear risk of bias because study reports lacked omitted or lacked operational details associated with study methodology.

We categorised 341/381 RCTs as having a high risk of bias because of inadequate numbers of participants in the primary TENS trial arm sample (i.e. <50 participants, with no RCTs meeting our criteria for low risk of bias (>200 participants in the TENS arm). There were 13/381 RCTs that used  $\geq 100$  participants in the primary TENS trial arm. The largest TENS trial arm size was 144 participants in an RCT with a total sample of 607 women randomised to receive acupuncture, TENS, or traditional analgesics to manage labour pain<sup>92</sup>. It was found that the use of pharmacological and invasive methods was lower in the acupuncture group compared with TENS ( $P = 0.031$ ) or traditional analgesics ( $P < 0.001$ ), although pain scores were comparable across groups.

### **Randomisation and Allocation (selection bias)**

We judged that 136/381 RCTs adequately described the method of random sequence generation and that 82/381 RCTs adequately described the method of allocation concealment.

### **Blinding (performance bias and detection bias)**

There were 94/381 reports that described a method of blinding of participants that was of low risk of performance bias. There were 48/381 reports that described a method of blinding of personnel that was of low risk of performance bias. There were 130/381 reports that described a method of blinding of assessors that was of low risk of detection bias.

Only a few studies attempted to assess seepage of blinding and/or whether participants and/or assessors considered interventions to be functioning correctly (active) or therapeutically plausible/credibility including<sup>85,89,93,94</sup>. Of the studies judged to be of low risk of performance bias<sup>84,85,89</sup> were noteworthy for detailed reporting of well-considered design attributes including the design and delivery of an authentic placebo control and an evaluation of the success or otherwise of blinding of the outcome assessor.

### **Incomplete outcome data (attrition bias)**

We awarded low risk of bias to studies with reports that reported that all participants completed the study with no missing outcome data or missing outcome data was balanced across the groups with similar reasons for loss. There were 118/381 RCTs judged to be of low risk of attrition bias.

### **Selective reporting (reporting bias)**

There were 90/381 RCTs judged to be of low risk of reporting bias.

### **Sample size**

There were 13/381 RCTs with at least 100 participants in the TENS treatment arm and only 2 of these RCTs had extractable data<sup>95</sup>(labour pain)<sup>96</sup>(fibromyalgia). There were 341/381 RCTs with fewer than 50 participants in the TENS treatment arm.

### **Sample size estimation**



MetaTENS\_SupplementaryAppendix\_FINAL\_23-12-2020

1  
2  
3 There were 129/381 reports that stated that a calculation had been undertaken to estimate sample  
4 size, although often the actual calculation was not provided. Often sample size estimates were  
5 stated for total number of participants rather than numbers needed in each trial arm and did not  
6 meet our criteria for low risk of bias.  
7  
8  
9  
10  
11  
12  
13  
14  
15  
16  
17  
18  
19  
20  
21  
22  
23  
24  
25  
26  
27  
28  
29  
30  
31  
32  
33  
34  
35  
36  
37  
38  
39  
40  
41  
42  
43  
44  
45  
46  
47  
48  
49  
50  
51  
52  
53  
54  
55  
56  
57  
58  
59  
60

For peer review only

### TENS versus placebo: Analysis of effects

There were 202/381 RCTs (203 samples) that compared TENS with a placebo intervention. There were 196 RCTs that delivered placebo TENS in one of the following ways:

- Using a modified TENS device that did not deliver currents (i.e. 0 mA, dead battery, modified circuitry, 155 interventions)
- Using a modified TENS device that delivered currents above that sensory detection threshold for a brief period (< 1 minute) before the amplitude declined to 0 mA (17 interventions)
- Using a modified TENS device that delivered currents above that sensory detection threshold using an interpulse interval of such long duration that it was considered by the authors not to have any physiological action (4 interventions)
- Delivering TENS at amplitudes below sensory detection threshold (12 interventions)
- Delivering TENS above that sensory detection threshold at sites considered to be unrelated to the pain (4 interventions)
- Four reports that did not state the nature of a placebo TENS intervention.

There were 6 RCTs that administered placebo pills and 1 RCT used a non-functioning ultrasound device.

#### Outcome: Pain intensity - expressed as mean (continuous) data

We extracted data at the last during TENS or the first post-TENS intervention measurement point after a course of TENS treatment (or a single treatment if only one TENS treatment was given) from 91 RCTs (92 samples, 4841 participants). Three of these RCTs were crossover studies deemed to have sufficient washout between interventions to eliminate contamination<sup>89,97,98</sup>. There was a significant overall effect in favour of TENS (SMD -0.96; 95% CI -1.14, -0.78) and substantial heterogeneity  $I^2 = 88%$ . (Figure A2).

Visual inspection of the forest plot found reasonable consistency of treatment effects and overlap of confidence intervals with effect estimates and confidence intervals on the side favouring TENS in 50/92 samples. One of these RCTs seems to be an outlier<sup>99</sup> and a sensitivity analysis did not alter the overall effect. We suspected transcriptional errors whereby data had been attributed to the incorrect intervention group in two RCT reports<sup>35,100</sup>. In both instances mean  $\pm$  SD data was incorrectly attributed to the placebo group rather than the TENS group in the table of results because all aspects of the report discussed RCT outcome in favour of TENS rather than placebo. We attempted to contact RCT authors for clarification without reply. Cross checking data extracted in a systematic review arising from the same country as Luchesa et al. and published within 3 years of the original report confirmed the transcription error<sup>101</sup> and correct data was entered into our meta-analysis. However, we were unable to confirm the transcription error for<sup>35</sup>. This potential error affected data related to the 'vaginal delivery group' but not a separate sample within the same study (the 'caesarean section group'). Therefore, we entered the data presented in the original report (Table 2 p3) into our meta-analysis. Sensitivity analyses by removing this 'vaginal delivery group' sample from subsequent analyses did not affect tests of overall effect nor tests for subgroup differences.

#### Forest Plot

MetaTENS\_SupplementaryAppendix\_FINAL\_23-12-2020

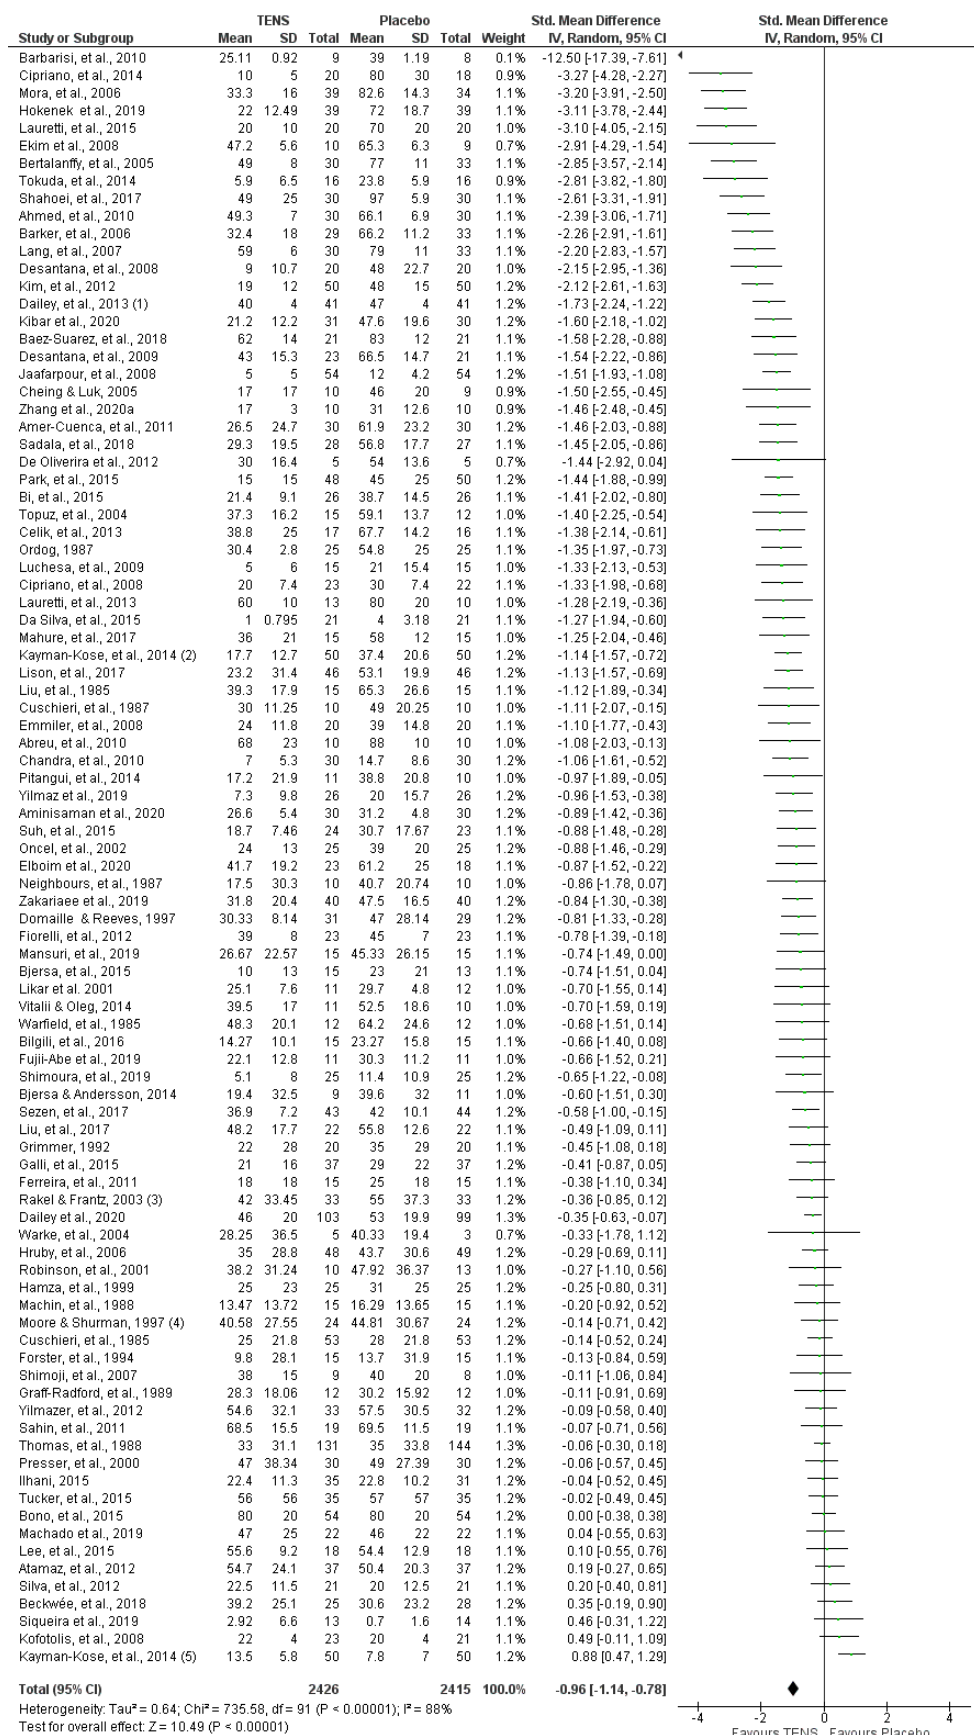

Footnotes

- (1) \*Crossover
- (2) \*Cesarian delivery sample
- (3) \*Crossover
- (4) \*Crossover
- (5) \*Vaginal delivery sample

1  
2  
3 Figure A2 Forest plot of comparison TENS versus placebo. Outcome: pain intensity - expressed as  
4 mean (continuous) data.  
5

6 ***Subgroup – Methodological Characteristics***

7 Subgroup analyses were conducted to explore the impact of methodological characteristics on effect  
8 sizes, tests of overall effect and statistical heterogeneity.  
9

10  
11 ***Risk of Bias***

12 A subgroup analysis was conducted to explore the effect of RCTs having an overall low risk of bias  
13 (i.e.  $\geq 6$  low RoB items out of a total of 9 items). The test for subgroup differences was not  
14 statistically significant ( $\text{Chi}^2 = 1.96$ ,  $\text{df} = 1$  ( $P = 0.16$ )), suggesting that overall RoB does not modify the  
15 effect of TENS in comparison to placebo. There are enough trials and participants in each subgroup,  
16 so the covariate distribution is not concerning. There is substantial heterogeneity between results  
17 from the trials within each subgroup, therefore the validity of the treatment effect estimate for each  
18 subgroup is uncertain (Figure A3).  
19

20  
21 ***Forest Plot***  
22  
23  
24  
25  
26  
27  
28  
29  
30  
31  
32  
33  
34  
35  
36  
37  
38  
39  
40  
41  
42  
43  
44  
45  
46  
47  
48  
49  
50  
51  
52  
53  
54  
55  
56  
57  
58  
59  
60









1  
2  
3 that stated in the trial report significantly modifies the effect of TENS in comparison to placebo. The  
4 treatment effect favours TENS over placebo for all categories of pain condition; therefore, the  
5 subgroup effect is quantitative. However, there are more trials (and participants) contributing data  
6 from some pain conditions than others, and there is considerable unexplained heterogeneity  
7 between the trials within each of these subgroups. A sensitivity analysis that removed subgroups  
8 with pooled sample sizes of fewer than 100 participants in the primary TENS trial arm was not  
9 statistically significant ( $\text{Chi}^2 = 1.25$ ,  $\text{df} = 5$ ,  $P = 0.94$ ; figure not shown), suggesting that the pain  
10 condition categorised according to that stated in the trial report does not significantly modify the  
11 effect of TENS in comparison to placebo. Therefore, the validity of the treatment effect estimate for  
12 each subgroup is uncertain, as individual trial results are inconsistent.  
13  
14  
15

16 *Forest Plot*  
17  
18  
19  
20  
21  
22  
23  
24  
25  
26  
27  
28  
29  
30  
31  
32  
33  
34  
35  
36  
37  
38  
39  
40  
41  
42  
43  
44  
45  
46  
47  
48  
49  
50  
51  
52  
53  
54  
55  
56  
57  
58  
59  
60

For peer review only



### Plausibility Pain Characteristics - subgroup findings

The subgroup analyses on pain characteristics provides support to claims that TENS is beneficial for any type of pain. Treatment effects of TENS were not modified when pain was categorised according to duration (acute versus chronic) or pain diagnoses according to RCT author. The direction subgroup effects were in favour of TENS but of different sizes (i.e. quantitative), although substantial heterogeneity between results from the trials within each subgroup undermined confidence in the magnitude of treatment effect estimates for each subgroup. Nevertheless, the magnitude of any putative subgroup differences was of a scale that would be too small to impact clinical decisions. In summary, the findings of our subgroup analyses on clinical characteristics are consistent with research that has found no relationships between the outcome and type of pain<sup>102</sup>.

### Analysis of Publication Bias - TENS vs Placebo

We visually inspected funnel plots to explore the likelihood of reporting bias if there were at least 10 RCTs in a meta-analysis. Egger's regression test showed significant evidence of a small-study effect ( $p < 0.0001$ ). Trim and fill analysis showed evidence of publication bias, indicating that eight trials might be missing to right of mean for an adjusted SMD of -0.78 (95% CI -0.995 to -0.565) (random-effects model).

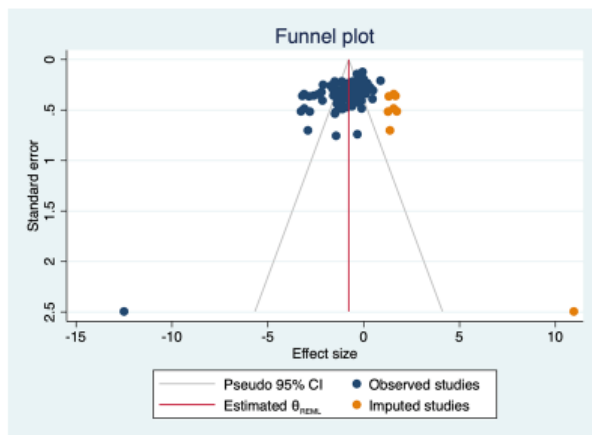

Figure A7 Funnel plot of TENS versus placebo comparison with trim and fill analysis. Actual results displayed in blue. Results corrected for the possibility of a publication bias displayed in orange.

**Outcome:  $\geq 30\%$  reduction in pain**

There were two RCTs that had extractable data with a total of 118 participants receiving TENS and 114 receiving placebo<sup>89,103</sup>. It was not possible to conduct an analysis of the proportion of participant-reported pain relief of  $\geq 30\%$  expressed as frequency (dichotomous) data because of insufficient data. Nonetheless, the RCT by<sup>89</sup> was of high quality and had a low RoB across 7 of 9 RoB items, with the largest trial arm sample size of any comparison with placebo in our review (TENS = 103 participants vs. placebo TENS = 99 participants). The study provides strong evidence that using TENS for 4 weeks produced clinically meaningful improvement in movement-evoked pain and pain at rest when compared with placebo TENS, for women experiencing pain associated with fibromyalgia who were on a stable medication.

**Outcome:  $\geq 50\%$  reduction in pain (i.e.  $\geq$ substantial pain relief)**

It was possible to extract data from 9 RCTs (460 participants, 9 samples of participants). There were two crossover RCTs and both were deemed to have sufficient washout between interventions to eliminate contamination<sup>104,105</sup>. At the last during TENS or the first post-TENS intervention measurement point, there were 106/241 participants that reported pain relief of  $\geq 50\%$  or greater (responders) for TENS compared with 28/219 participants for any type of placebo. There was a statistically significant difference in the proportion of participants achieving substantial pain relief in favour of TENS with the risk ratio being 2.89 [2.02, 4.13] and no heterogeneity ( $I^2 = 0\%$ ; Figure A8). There are too few RCTs and participants to be entirely certain of the validity of the treatment effect estimate. Therefore, we did not calculate number needed to treat, nor undertake subgroup analyses to explore the effect of methodological or clinical characteristics on outcome.

*Forest plot*

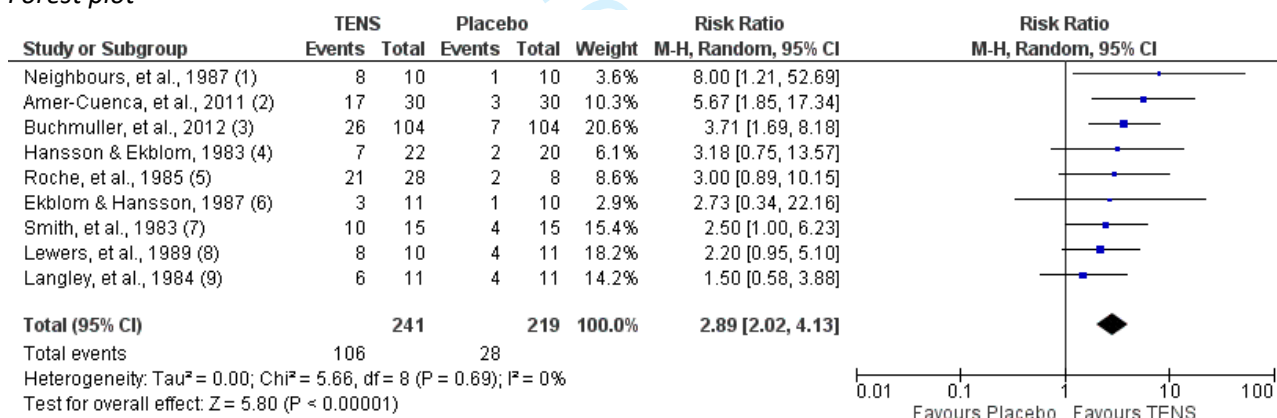

Figure A8 Forest plot of comparison TENS versus placebo. Outcome:  $\geq 50\%$  reduction in pain. NOTE: Favours TENS on the right-hand side of the Forest plot.

### TENS versus no treatment - Analysis of effects

We considered an intervention as 'no treatment' if we were assured that the participants did not receive any other 'active' treatment. We did not include interventions described as controls that allowed patients any type of active treatment, including medication or exercise. Thus, RCTs that compared TENS in combination with a pharmacological agent versus a control consisting of the pharmacological agent on its own were not included in this analysis.

There were 16 RCTs that we categorised as comparing TENS with a no treatment intervention. One was a crossover RCT deemed to have enough washout between interventions to eliminate contamination<sup>106</sup>.

#### Outcome: Pain intensity - expressed as mean (continuous) data

We extracted data at the last during TENS or the first post-TENS intervention measurement point from 10 RCTs (10 samples, 602 participant). There was a significant overall effect in favour of TENS (SMD -0.82; 95% CI -1.18, -0.46; Figure A9), and substantial heterogeneity ( $I^2 = 76\%$ ). There was insufficient data to undertake subgroup analyses to explore the effect of methodological nor clinical characteristics on outcome.

#### Forest plot

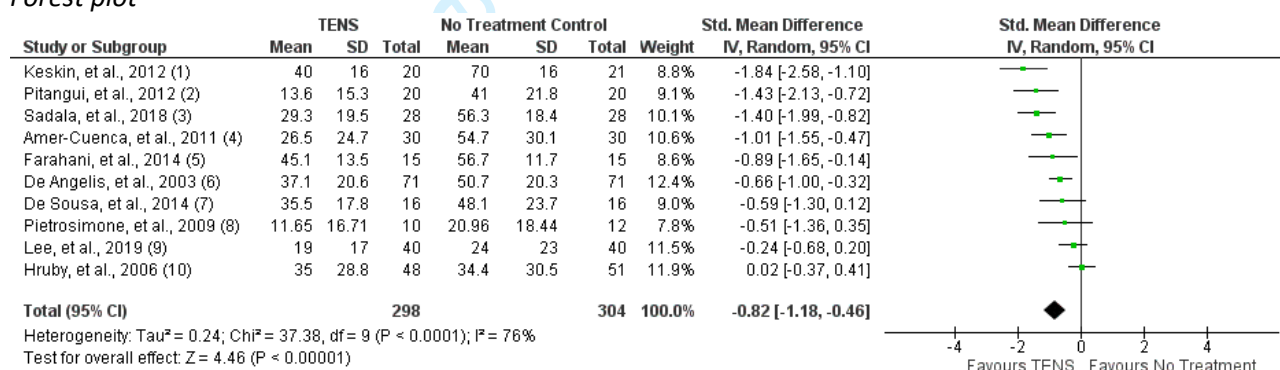

Figure A9 Forest plot of comparison TENS versus no treatment. Outcome: pain intensity - expressed as mean (continuous) data.

#### Analysis of publication bias – TENS vs No Treatment

We visually inspected funnel plots to explore the likelihood of reporting bias. Egger's regression test showed significant evidence of a small-study effect ( $p = 0.0878$ ). However, Trim and fill analysis showed no evidence of publication bias.

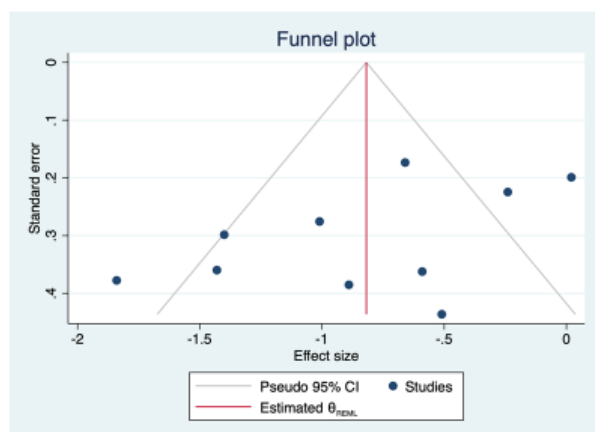

Figure A10 Funnel plot of TENS versus no treatment comparison.

**Outcome:  $\geq 30\%$  reduction in pain**

It was not possible to conduct an analysis of the proportion of participant-reported pain relief of  $\geq 30\%$  expressed as frequency (dichotomous) data because there were no RCTs with extractable data.

**Outcome:  $\geq 50\%$  reduction in pain**

It was not possible to conduct an analysis of the proportion of participant-reported pain relief of  $\geq 50\%$  expressed as frequency (dichotomous) data because of insufficient data (There was only one RCT with extractable data; <sup>87</sup>).

For peer review only

### TENS versus standard of care - Analysis of effects

We considered an intervention as ‘standard of care’ if trial authors considered the intervention or intervention(s) to be fully or part of ‘common’, ‘routine’, or ‘standard’ practice and/or care, irrespective of whether authors explicitly named the intervention as ‘standard of care’. Interventions were either TENS compared head-to-head with a SoC intervention (i.e. TENS vs SoC) or TENS as an adjunct to a SoC intervention (i.e. TENS combined with SoC vs SoC alone).

There were 127 RCTs (127 samples) that we categorised as comparing TENS with a SoC intervention. There were 8 crossover RCTs and all were deemed to have sufficient washout between interventions to eliminate contamination<sup>79,81,98,107-111</sup>. We categorised 40 of these SoC interventions as RCTs predominantly exercise/physiotherapy based, 71 as predominantly pharmacologically based, 3 as exercise/physiotherapy combined with pharmacological, and 13 RCTs as neither exercise/physiotherapy nor pharmacological (other), and/or unclear.

### Outcome: Pain intensity - expressed as mean (continuous) data

We extracted data at the last during TENS or the first post-TENS intervention measurement point from 61 RCTs (61 samples, 3155 participants). There were five crossover RCTs and all were deemed to have sufficient washout between interventions to eliminate contamination<sup>79,81,84,98,109</sup>. There was a significant overall effect in favour of TENS (SMD -0.72; 95% CI-0.95, -0.50) and substantial heterogeneity ( $I^2 = 88%$ ; Figure A11). The test for subgroup differences was not statistically significant ( $\chi^2 = 4.16$ ,  $df = 2$ ,  $P = 0.12$ ), suggesting that the nature of the SoC intervention does not modify the effect of TENS in comparison with SoC. There are enough trials and participants in each subgroup, so the covariate distribution is not concerning. There is substantial heterogeneity between results from the trials within each subgroup, therefore the validity of the treatment effect estimate for each subgroup is uncertain.

### Forest plot

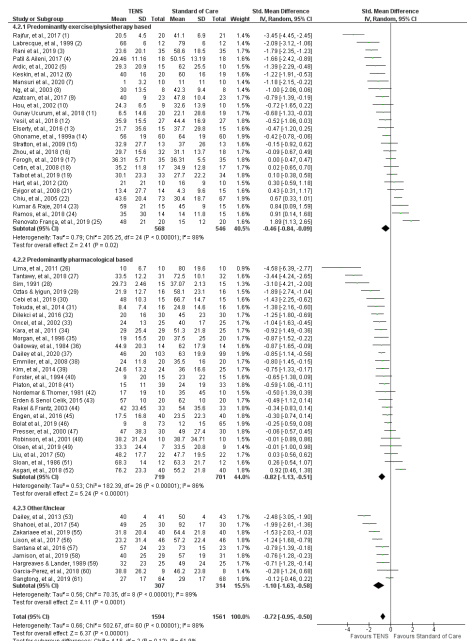

Figure A11 Forest plot of comparison TENS versus standard of care. Outcome: pain intensity - expressed as mean (continuous) data. Subgroup analysis comparing TENS either alone or when added to exercise/physiotherapy based interventions, pharmacologically based interventions, and SoC that was categorised as other/unclear.



### Analysis of publication bias – TENS vs SoC

We visually inspected funnel plots to explore the likelihood of reporting bias. Egger's regression test showed significant evidence of a small-study effect ( $p = 0.0062$ ). Trim and fill analysis showed evidence of publication bias, indicating that 11 trials might be missing to left of mean for an adjusted SMD of  $-1.032$  ( $-1.31, -0.76$ ) (random-effects model).

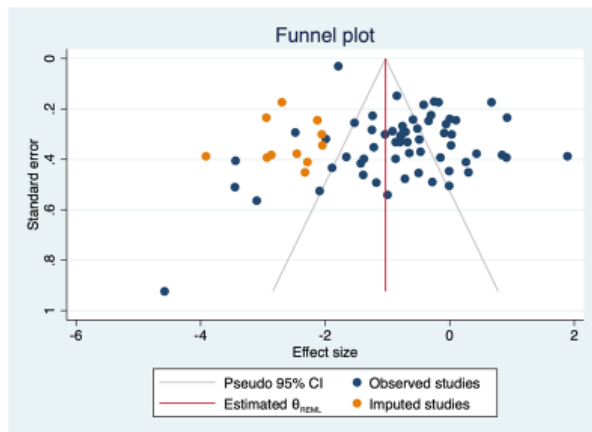

Figure A12 Funnel plot of TENS versus standard of care comparison with trim and fill analysis. Actual results displayed in blue. Results corrected for the possibility of a publication bias displayed in orange.

The finding that 11 trials might be missing to left of mean might be due to contamination by other concurrent treatments in both TENS and comparator groups – participants may titrate concurrent treatments to achieve comparable pain in both groups. This may result in underestimation of TENS effects<sup>112 113</sup>

#### Outcome: $\geq 30\%$ reduction in pain

There were two RCTs that collected dichotomous data. The RCT by<sup>89</sup> had low RoB across 7 of 9 RoB items, and provided strong evidence that using TENS for 4 weeks produced clinically meaningful improvement in movement-evoked pain and pain at rest when compared with placebo TENS, for women experiencing pain associated with fibromyalgia who were on a stable medication and routine care. The study by<sup>26</sup> found no differences between TENS and manual therapy the proportion of participants achieving moderate reductions in neck pain of at least 20 mm on a 100 mm VAS (which is below our threshold of  $\geq 30\%$  reduction). Hence, it was not possible to conduct an analysis of the proportion of participant-reported pain relief of  $\geq 30\%$  expressed as frequency (dichotomous) data because of insufficient data.

#### Outcome: $\geq 50\%$ reduction in pain

There was one RCT (parallel group) with extractable data. It was not possible to conduct an analysis of the proportion of participant-reported pain relief of  $\geq 50\%$  expressed as frequency (dichotomous) data because of insufficient data.

## TENS versus Other Treatments - Analysis of effects

We considered an intervention as 'another treatment' if participants received a comparison intervention that had not been categorised as standard of care (SoC). The purpose of the analysis was to undertake a head-to-head comparison of TENS versus another treatment, so we extracted data that enabled isolation of effects between TENS and another treatment providing any additional care and/or treatment was standardised between groups, e.g. in instances when patients were also given pharmacological, exercise, or physiotherapy-based treatment. The nature of comparisons was either TENS compared head-to-head with another treatment either alone or on a background of care standardised between groups.

We identified 118 RCTs (131 samples) that compared TENS with at least one other treatment. There were four crossover RCTs and all were deemed to have sufficient washout between interventions to eliminate contamination<sup>68,109,114,115</sup>. There were 13 RCTs that compared TENS with more than one treatment intervention. We decided to include all comparisons in the meta-analysis and conducted a sensitivity analysis by removing multiple comparisons from RCTs to explore the effect of duplicate TENS data on outcome.

### Outcome: Pain intensity - expressed as mean (continuous) data

We extracted data at the last during TENS or the first post-TENS intervention measurement point from 67 RCTs (131 samples, 3327 participants, including duplicates from primary TENS arm).

We extracted data at the last during TENS or the first post-TENS intervention measurement point from 67 RCTs (131 samples, 3327 participants, including duplicates from primary TENS arm). There were 11 crossover RCTs and all were deemed to have sufficient washout between interventions to eliminate contamination<sup>68,104,109,115-122</sup>.

There was not a statistically significant difference in participant-reported pain intensity (Test for overall effect:  $Z = 1.08$ ,  $P = 0.28$ ; Random-effects model; Figure A15) and this did not change following the sensitivity analysis that removed multiple samples from the same RCT (favouring samples that were in subgroups with multiple RCTs) and/or removed subgroups with fewer than 2 RCTs.

The test for subgroup differences was statistically significant ( $\text{Chi}^2 = 82.82$ ,  $\text{df} = 24$ ,  $P < 0.00001$ ). It was noted that there was a statistically significant difference in favour of percutaneous electrical nerve stimulation compared with TENS (4 samples, TENS = 157 participants,  $P < 0.0001$ ), but no other statistically significant differences for subgroups that had more than one RCT in the pooled data sample. The test for subgroup differences was still statistically significant after removing subgroups with fewer than 100 participants pooled in the TENS trial arm. Subgroup analysis indicate that the type of treatment intervention used as a comparison significantly modifies the effect of TENS. The treatment effect favours TENS in some but not all comparisons; therefore, the subgroup effect is qualitative. However, there are more trials (and participants) contributing data from some of the subgroups, and there is considerable unexplained heterogeneity between the trials within each of these subgroups. Therefore, the validity of the treatment effect estimate for each subgroup is uncertain, as individual trial results are inconsistent.

We choose not to report the meta-analysis in the final report. There is a heterogeneous mix of comparators, the inclusion of duplicate data in the TENS arm, and sub-groups with too few comparisons (Figure A13).

*Forest plot*

MetaTENS\_SupplementaryAppendix\_FINAL\_23-12-2020

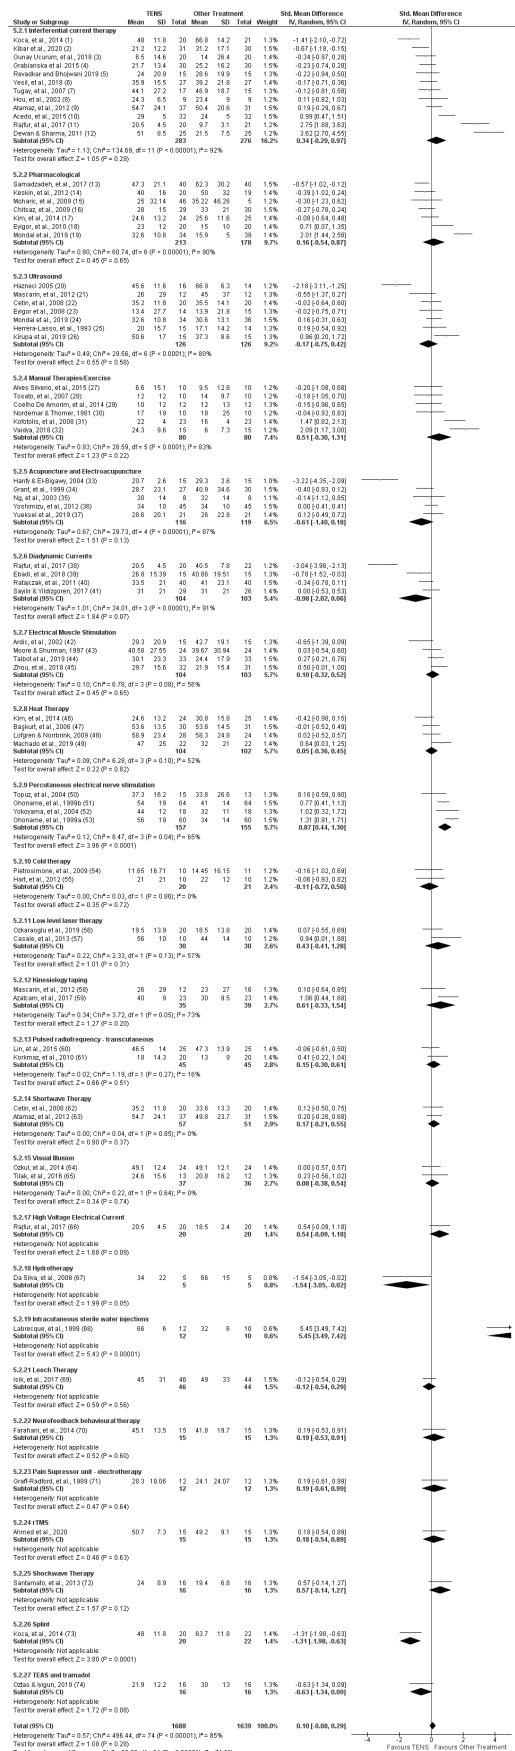

Figure A13 Forest plot of comparison TENS versus other treatments. Outcome: pain intensity - expressed as mean (continuous) data. Subgroup analysis comparing TENS with different treatment modalities.

**Analysis of publication bias – TENS vs. Other treatment**

We did not undertake an analysis of publication bias because we choose not to report the meta-analysis in the final report. There is a heterogeneous mix of comparators, the inclusion of duplicate data in the TENS arm, and sub-groups with too few comparisons

**Outcome:  $\geq 30\%$  reduction in pain**

There were no RCTs with extractable data, so it was not possible to conduct an analysis of the proportion of participant-reported pain relief of  $\geq 30\%$  expressed as frequency (dichotomous) data because of insufficient data.

**Outcome:  $\geq 50\%$  reduction in pain**

There was one RCT of crossover design with extractable data and sufficient washout between interventions to eliminate contamination<sup>104</sup>. It was not possible to conduct an analysis of the proportion of participant-reported pain relief of  $\geq 50\%$  expressed as frequency (dichotomous) data because of insufficient data.

### High frequency TENS versus low frequency TENS - Analysis of effects

There were 37 RCTs that included at least one comparison of high versus low frequency TENS. There was insufficient extractable data to conduct a subgroup analysis of high versus low frequency TENS for any of the previous analyses of either adverse events or effects of interventions.

#### Outcome: Pain intensity - expressed as mean (continuous) data

We extracted data at the last during TENS or the first post-TENS intervention measurement point from 13 RCTs (13 samples, 468 participants, no crossover RCTs) that compared high frequency and low frequency TENS. There was not a statistically significant difference in participant-reported pain intensity when data was pooled from samples (SMD -0.19; 95%CI -0.43, 0.06; Figure A14).

#### Forest plot

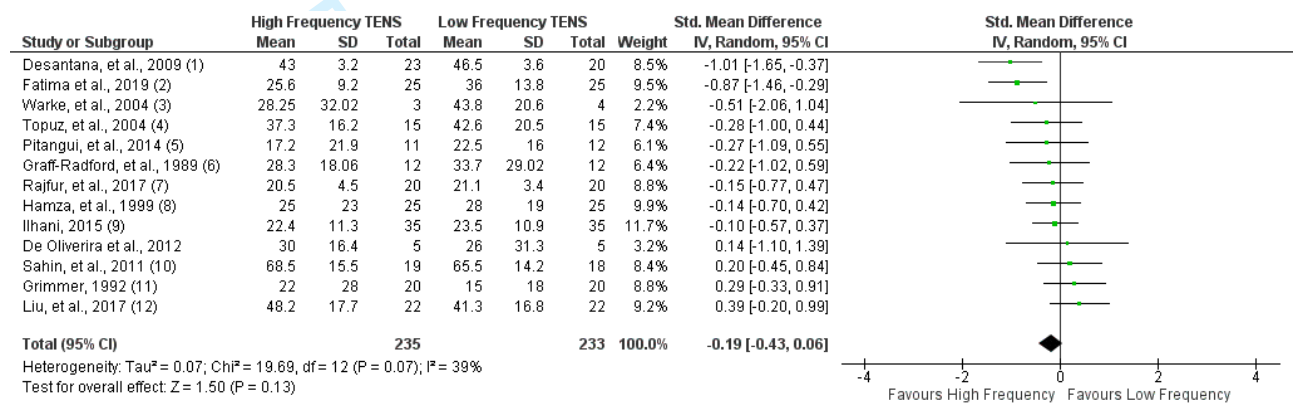

Figure A14 Forest plot of comparison high frequency TENS versus low frequency TENS. Outcome: pain intensity - expressed as mean (continuous) data.

#### Analysis of publication bias – High vs. low frequency TENS

We visually inspected funnel plots to explore the likelihood of reporting. Egger's regression test showed no evidence of a small-study effect (p = 0.8871). Trim and fill analysis showed no evidence of publication bias.

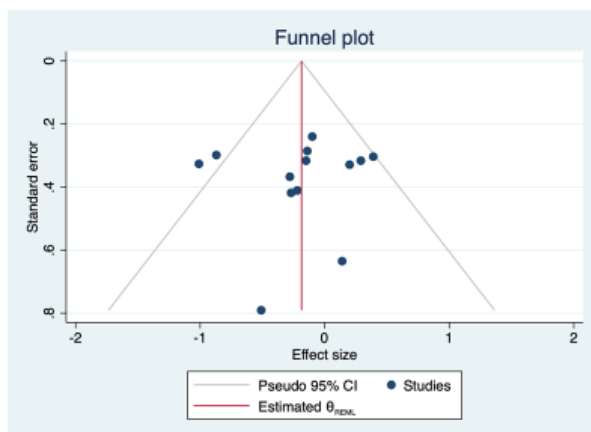

Figure A15 Funnel plot of high frequency versus low frequency TENS comparison.

#### Outcome: ≥30% reduction in pain

There was one RCT (parallel group) with extractable data<sup>123</sup>. It was not possible to conduct an analysis of high versus low frequency TENS for the proportion of participant-reported pain relief of ≥30% expressed as frequency (dichotomous) data because of insufficient data.

**Outcome:  $\geq 50\%$  reduction in pain**

It was possible to extract data from 4 RCTs (5 samples, 286 participants). There were two crossover RCTs and all were deemed to have sufficient washout between interventions to eliminate contamination<sup>104,105</sup>. We pooled 4 samples with 28/94 participants that reported pain relief of  $\geq 50\%$  or greater (responders) for high frequency TENS compared with 39/92 participants for low frequency TENS. This was just below our threshold of 100 participants per trial arm for conducting meta-analysis, although the Forest plot is presented for visual inspection (Figure A16).

**Forest plot**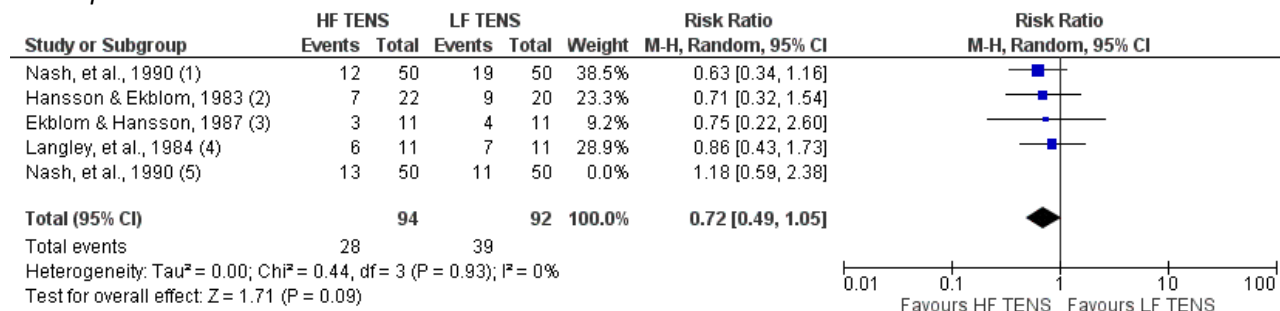

Figure A16 Forest plot of comparison high frequency TENS versus low frequency TENS. Outcome:  $\geq 50\%$  reduction in pain.

### Adverse events - Analysis of effects

Textual and numerical information related to adverse events was extracted directly from primary reports via cut and paste into a word document as summarised in the interactive online table - Adverse Events.

Often trial reports did not clearly distinguish adverse events related to the study or not, or whether they were likely a result of a worsening medical condition, including co-morbidity, medical procedures, or treatments other than TENS. Information related to adverse events was summarised and coded in an Excel spreadsheet for descriptive analysis. There were 245/381 reports that did not include a statement about the incidence of adverse events. Out of the 136 reports that included a statement of adverse events, 59/136 reports stated there were no adverse events any of the intervention groups during the RCT and 90/136 reports stated there were no adverse events related to TENS. There were 46 reports that stated the occurrence of adverse events that may be associated with TENS, none of which were deemed by authors to be a serious adverse event directly attributable to TENS. There was one report of the possibility that TENS may contribute to a serious adverse event in an RCT evaluating the effect of electrical stimulation on Botulinum Toxin A therapy in patients with chronic myofascial pain syndrome: *"There was a possible relationship between the treatment and spontaneous abortion ... that occurred 21 days after BTX-A injection and electrical stimulation."*<sup>124</sup> p414. Adverse events associated with TENS were generally described as mild in severity and infrequent in occurrence and included skin irritation, tenderness/soreness and TENS discomfort. Worsening symptoms (e.g. increase in pain-soreness) was identified as a negative consequence of TENS, although often it was unclear whether trial authors considered this to an adverse event or lack of treatment efficacy.

#### Outcome: Relative Risk

We extracted ratio data from 18 RCTs (1587 participants) for meta-analysis by counting the number of adverse events, irrespective of severity. We were thorough in checking for double counting but not all reports were clear in disclosing adverse events so we cannot guarantee with certainty that there may be an occasional counting of two adverse arising from one participant.

There was not a statistically significant difference in the tally of adverse events between TENS (63 events, 805 participants) and the comparison group (95 events, 782 participants) with the risk ratio being 0.73 (95% CI 0.36, 1.48; Figure A17). The test for subgroup differences in adverse events when TENS was compared with a placebo control (6 RCTs, 828 participants) or active treatment comparison (12 RCTs, 759 participants) was not statistically significant ( $\text{Chi}^2 = 2.50$ ,  $\text{df} = 1$  ( $P = 0.11$ ),  $I^2 = 60.0\%$ ), suggesting that the type of comparison intervention does not modify the frequency of adverse effects associated with TENS. There are enough trials and participants in each subgroup, so the covariate distribution is not concerning. There is moderate and substantial heterogeneity between results from the trials within each subgroup, therefore, the validity of the treatment effect estimate for each subgroup is uncertain.

#### Forest plot



MetaTENS\_SupplementaryAppendix\_FINAL\_23-12-2020

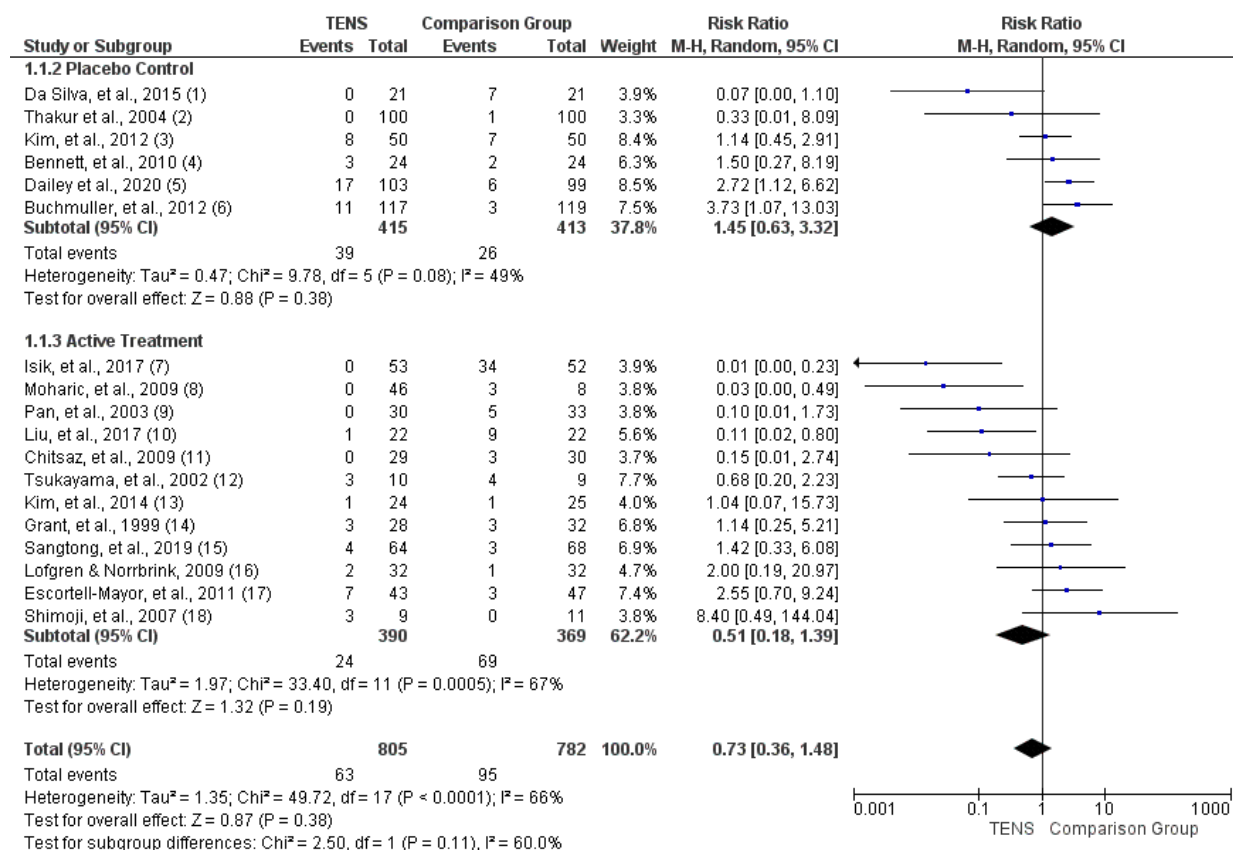

Figure A17 Forest plot of adverse events comparison TENS versus any comparison.

**Plausibility: Minor and infrequent adverse events from TENS**

Clinical experts claim that TENS hazards associated with TENS are minor and that there is minimal potential for serious, life threatening, adverse events<sup>6,125</sup>. This is consistent with our findings for our descriptive analysis that found that adverse events during and/or after TENS treatment were reported to be minor and included skin irritation, worsening symptoms and TENS discomfort. There were no reports of serious adverse events, although there was one report of a possible relationship between TENS contributing to a spontaneous abortion in a woman although this occurred 21 days after treatment. Having considered overall quality of available evidence, limitations in our review process and physiological and clinical plausibility we are confident that there is minimal harm associated with TENS, although our estimate of risk ratio lacked precision.

## Potential biases in the review process: Description

### Search strategy and screening process - Limitations

Our search strategy for RCTs was broad and involved screening of over 8000 records. We also conducted a search specifically for systematic reviews for a separate analysis and this enabled cross referencing of RCTs between searches. Thus, we are confident that our search was comprehensive.

Our screening processes identified RCTs that had optimised TENS intervention in terms of generating a strong non-painful TENS sensation at (or close to) the site of pain, irrespective of variations in electrical characteristics of currents produced by a 'standard TENS device'. We did not include in our evaluation TENS-like devices (e.g. interferential therapy, transcutaneous electrical acupoint stimulation) that may have been delivered in such a way as to generate a strong comfortable paraesthesia with similar qualities as that experienced with 'standard TENS'. None of our analyses to date suggest that between or within trial variations in specific electrical characteristics of TENS influences clinical outcome to any significant degree.

### Effects size estimates - Limitations in the analysis (confounding factors)

Much heterogeneity remained unexplained following subgroup analyses exploring methodological and patient characteristics.

### Sample size

We attribute the presence of statistical heterogeneity to the inclusion of lots of RCTs with small sample sizes and this has contributed to risk of bias and imprecision in data for all pooled analyses. It is a matter for debate whether we should have used a higher threshold for trial arm size, although our subgroup analysis of trial arm sizes of  $\geq 30$  and  $\geq 50$  participants failed to detect subgroup effects.

RCTs with large total sample sizes compromised statistical power by having multiple intervention groups that markedly reduced the number of participants randomised to trial arms and increased imprecision of estimates of treatment effects.

### Quality of reporting - observations

Generally, trial reports lacked recommended levels of detail suggested for reporting TENS trials<sup>112</sup>. It was noticeable that many trial reports focussed on physiological and clinical plausibility of findings rather than the integrity of methods, data, and analyses.

### Trial Design - Pragmatic and Exploratory

We included a spectrum of pragmatic and explanatory trials, and it is known that pragmatic trials tend to have higher standard deviations because they recruit a wider range of participants but are more useful to inform options for care in clinical settings<sup>126</sup>.

Some RCTs were overly complicated in design and had too many comparison groups and outcome measures, at the expense statistical power.

### Cross-over studies - Sensitivity analysis

We included cross-over studies and pre-specified that we would only extract data from the first phase unless we considered there to be sufficient duration of washout between crossover to prevent carry-over effects. We were only able to extract data from a few cross-over trials and in all instances, we considered there to be sufficient washout as evidence suggests that the effects of TENS are generally short-lived.

We conducted sensitivity analyses and found that removal of crossover trials did not affect findings of the analysis

- TENS versus placebo
  - All trials
    - SMD [95% CI] = -0.96 [-1.14, -0.78] Test for overall effect:  $Z = 10.37$  ( $P < 0.00001$ ) Heterogeneity:  $\text{Tau}^2 = 0.64$ ;  $\text{Chi}^2 = 733.23$ ,  $\text{df} = 90$  ( $P < 0.00001$ );  $I^2 = 88\%$ ).
  - After removal of <sup>84,98,127</sup>
    - SMD [95%CI] = -0.97 [-1.16, -0.79] Test for overall effect:  $Z = 10.35$  ( $P < 0.00001$ ) Heterogeneity:  $\text{Tau}^2 = 0.66$ ;  $\text{Chi}^2 = 726.33$ ,  $\text{df} = 88$  ( $P < 0.00001$ );  $I^2 = 88\%$ ).

Analysing crossover data as if parallel group, normally requires generic inverse variance to correct for correlation between groups using the same participants (paired data), but we argue that has negligible impact on outcome because generic inverse variance increases confidence intervals and this will be negated by the influence of the overwhelming number of data points from parallel group studies.

### **Appropriateness of TENS**

The electrical characteristics for TENS and the treatment regimens were diverse, but usually appropriate for clinical context, e.g. a single dose of less than five minutes for some procedural pains, to single doses one hour or a single daily dose over a period of a few week.

The included studies all administered TENS at a strong intensity that we consider to be optimal.

It was difficult to ascertain whether electrical characteristics and/or treatment regimens were advisory or prescribed for longer duration multiple treatment studies. Few studies formally measured frequency of home usage and/or whether there had been adherence to instructions on how best to self-administer TENS.

Many RCTs delivered TENS within clinical settings, which is appropriate for in-patient populations with acute pain, but less so for out-patient populations with chronic pain, where it would be more ecologically valid to monitor outcomes following a period of treatment that was self-administered home use.

As TENS is a self-administered technique-based intervention, we argue that RCTs using an enriched enrolment randomised withdrawal design would have utility. There were no such trials in the included studies.

### **Measurement time points**

Few TENS regimens lasted more than one month even for chronic pain. Follow-up after a course of treatment was short and no more than one month. We pre-specified analysis of data during or immediately after a single TENS intervention to account for such diversity so our analysis provides evidence of 'immediate' during treatment effects. We feel that this is ecologically valid but does not address the longer-term outcomes of TENS

### **Contamination**

We included data of interventions with concurrent use of pharmacological and/or non-pharmacological treatments (e.g. exercise, hot/cold therapies), as background or as rescue, formally as part of the design of the study. Contamination of estimates of treatment effect in RCTs and meta analyses has been recognised as an issue in RCTs of medical interventions <sup>128</sup>.

1  
2  
3  
4  
5  
6 Previously, we have argued that pain scores may be compromised when participants have access to  
7 analgesics because participants may titrate analgesic consumption to achieve tolerable levels of pain  
8 intensity in each intervention group<sup>113</sup>. Previously we have reported that contamination from the  
9 simultaneous use of other treatments is likely to bias toward underestimating treatment effects  
10 associated with TENS for pain<sup>112</sup>. We have argued that the influence of TENS on analgesic  
11 consumption, and associated side effects, may be a more meaningful measure and we are planning  
12 to evaluate the effect of TENS on analgesic consumption.  
13

#### 14 ***Risk of Performance Bias (blinding participant)***

15 We used an aide memoire adapted for TENS to support consistency of judgements for risk of bias.  
16

17  
18 Participant blinding has been central to the debate about the efficacy of TENS. Previous systematic  
19 reviews have managed judgements of performance bias associated with blinding participants and  
20 therapists inconsistently with some reviewers awarding high risk of performance bias arguing that it  
21 is impossible to blind participants to the sensory experience associated with TENS.  
22

23  
24 We argue that the key to blinding is whether participants are uncertain whether an intervention is  
25 'functioning properly' so that participants in treatment and placebo groups are uncertain whether  
26 they have received appropriate treatment. Many trials used a modified TENS device without current  
27 output coupled with pre-study briefings to create uncertainty about whether a treatment is  
28 'functioning properly'. This has been shown to mitigate over-estimation of effects associated with  
29 knowing which intervention is 'placebo' even when participants experience TENS sensations (see  
30 discussion in<sup>8</sup>). There were few RCTs that assessed the credibility and outcome of blinding of  
31 participants, those that did reported that blinding of this nature was successful.  
32

#### 33 **Adverse events - Limitations in the analysis**

34 All included RCTs focussed on treatment effects rather than adverse events. Adverse effects were  
35 rarely pre-specified as an outcome in trial reports and when they were methods and procedures to  
36 capture adverse effect data was unclear.  
37

38  
39 We found a lack of clarity in reports and especially whether the likely cause of adverse events was  
40 related to TENS or concurrent treatment such as medication, or other medical procedures such as  
41 surgery. Some reports categorised worsening symptoms as an adverse event rather treatment  
42 failure.  
43

44  
45 Many reports stated 'no significant adverse effects occurred in the study' or 'there were no side  
46 effects in either group' but did not provide comparative numerical data (e.g. tabulated). When  
47 pooling data for meta-analysis, we only extracted data as 'zero' if there was clear numerical data or  
48 there was a statement that no adverse events occurred in a group and this was accompanied by  
49 numerical data of the occurrence of at least one event in the comparator group(s).  
50

51  
52 Overall, our analysis is susceptible to bias associated with unclear and selective reporting of adverse  
53 events as most investigators reported spontaneous detection of adverse events based on ill-defined  
54 criteria. Characterisation and extraction of data to pool for meta-analysis for adverse events was  
55 imprecise because most reports inadequately described the monitoring, determination, and analysis.  
56 Criteria to recognise adverse events were absent, as were criteria for categorising seriousness. Thus,  
57 our estimate of risk ratio for the occurrence of adverse events lacked precision and there is still a  
58 need for more robust data.  
59  
60

1  
2  
3  
4  
5  
6  
7  
8  
9  
10  
11  
12  
13  
14  
15  
16  
17  
18  
19  
20  
21  
22  
23  
24  
25  
26  
27  
28  
29  
30  
31  
32  
33  
34  
35  
36  
37  
38  
39  
40  
41  
42  
43  
44  
45  
46  
47  
48  
49  
50  
51  
52  
53  
54  
55  
56  
57  
58  
59  
60

There are generally few published studies of adverse effects on TENS. Evidence suggests a higher incidence of skin reactions when using monophasic pulsed electrical currents. A laboratory study by <sup>129</sup> found that 52% of 25 healthy participants experienced adverse skin reactions to 10 minutes of subsensory monophasic pulsed transcutaneous electrical stimulation at the knee compared which was higher than reported rates in previous studies using asymmetrically biphasic pulsed electrical currents, which was only 4%. Most studies in our analysis used biphasic pulsed electrical currents.

For peer review only

## Certainty and Quality of Evidence

### GRADE Methodology

GRADE = Grades of Recommendation, Assessment, Development and Evaluation

GRADE judgements were undertaken independently by MIJ and CAP (GJ and PGW as arbiters).

We used GRADEPro software and the Guideline development tool to conduct the assessment of evidence and create evidence tables <https://grade.pro.org/>.

Certainty was assessed against the following criteria and if necessary downgraded:

- Risk of bias - Serious (- 1) or very serious (- 2)
- Inconsistency- Serious (- 1) or very serious (- 2)
- Indirectness - Serious (- 1) or very serious (- 2)
- Imprecision - Serious (- 1) or very serious (- 2)
- Publication bias – Strongly suspected (- 1)
- Large effect - according to Cohens d - Large (+1) or very large effect (+2).

GRADE judgements of pooled effects for outcomes were:

- Very low - The true effect is probably markedly different from the estimated effect
- Low - The true effect might be markedly different from the estimated effect
- Moderate - The authors believe that the true effect is probably close to the estimated effect
- High - The authors have a lot of confidence that the true effect is like the estimated effect.

We created an Aide Memoire to assist decision making [GRADE - Aide Memoire\_LIVE.docx]. The Aide Memoire was based on the GRADE handbook, Domain-specific guidance for writing useful explanations – from Cochrane and an item checklist developed by<sup>130</sup>

**GRADE: Summary of Findings**

**TENS versus Placebo**

TENS versus placebo for pain intensity at last during or first post intervention measurement point

| Certainty assessment                |              |               |              |             |                  |                               | Summary of findings                                                      |           |                          |                                                                               |                           |
|-------------------------------------|--------------|---------------|--------------|-------------|------------------|-------------------------------|--------------------------------------------------------------------------|-----------|--------------------------|-------------------------------------------------------------------------------|---------------------------|
| Participants (studies)<br>Follow up | Risk of bias | Inconsistency | Indirectness | Imprecision | Publication bias | Overall certainty of evidence | Study event rates (%)                                                    |           | Relative effect (95% CI) | Anticipated absolute effects                                                  |                           |
|                                     |              |               |              |             |                  |                               | With Placebo (any) at last during or first post intervention measurement | With TENS |                          | Risk with Placebo (any) at last during or first post intervention measurement | Risk difference with TENS |

Pain Intensity Rating (assessed with 0-10 intensity scale (VAS/NRS))

|                |                          |                      |                          |                          |                                                                       |                  |      |      |   |   |                                                 |
|----------------|--------------------------|----------------------|--------------------------|--------------------------|-----------------------------------------------------------------------|------------------|------|------|---|---|-------------------------------------------------|
| 4841 (91 RCTs) | not serious <sup>a</sup> | serious <sup>b</sup> | not serious <sup>c</sup> | not serious <sup>d</sup> | publication bias strongly suspected strong association <sup>e,f</sup> | ⊕⊕⊕○<br>MODERATE | 2415 | 2426 | - | - | SMD 0.96<br>SD lower (1.14 lower to 0.78 lower) |
|----------------|--------------------------|----------------------|--------------------------|--------------------------|-----------------------------------------------------------------------|------------------|------|------|---|---|-------------------------------------------------|

Reduction of pain intensity of 50% or more

|              |                          |                          |                          |                      |                                                    |                          |                |                 |                        |               |                                                |
|--------------|--------------------------|--------------------------|--------------------------|----------------------|----------------------------------------------------|--------------------------|----------------|-----------------|------------------------|---------------|------------------------------------------------|
| 460 (9 RCTs) | not serious <sup>a</sup> | not serious <sup>g</sup> | not serious <sup>c</sup> | serious <sup>h</sup> | publication bias strongly suspected <sup>e,i</sup> | ⊕⊕○○<br>LOW <sup>e</sup> | 28/219 (12.8%) | 106/241 (44.0%) | RR 2.89 (2.02 to 4.13) | 128 per 1,000 | 242 more per 1,000 (from 130 more to 400 more) |
|--------------|--------------------------|--------------------------|--------------------------|----------------------|----------------------------------------------------|--------------------------|----------------|-----------------|------------------------|---------------|------------------------------------------------|

CI: Confidence interval; RR: Risk ratio; SMD: Standardised mean difference; VAS: Visual analogue scale; NRS: Numerical rating scale

**Explanations**

a. Not serious. We did not rate down because overall, there was low or unclear RoB, except for sample size. There was low RoB for participant and assessor bias. We considered low sample size within inconsistency



MetaTENS\_SupplementaryAppendix\_FINAL\_23-12-2020

- 1  
2  
3 b. Serious. Point estimates varied moderately; Generally, confidence intervals overlapped, although not all overlapped at least one-point estimate. The direction of effect  
4 was consistent; The magnitude of statistical heterogeneity was high (e.g.  $I^2 > 60\%$ ) and unexplained and probably associated with the contribution from small sized  
5 studies. We downgraded (-1)  
6 c. Not serious. We did not rate down because the populations and interventions in included studies were highly applicable. The outcome was directly measured and in a  
7 sufficient timeframe. The conclusions were based on direct comparisons  
8 d. Not serious. We did not rate down because pooled data sample size does meet pre-specified (e.g. 500 participants per trial arm). Magnitude of median study sample size  
9 was low (<100 participants); Number of included studies was high (>10 studies); Overall effect estimate confidence intervals showing the possibility of an effect above the  
10 threshold of important benefit.  
11 e. Strongly suspected. Visual inspection of Funnel plots suggested asymmetry and Egger's test detected publication bias. We downgraded (-1)  
12 f. Large. Effect size was large based on pre-specified criteria by Cohen and remained large after trim-and-fit method. Upgraded (+1)  
13 g. Not serious. We did not rate down because point estimates varied moderately; All confidence intervals overlapped one-point estimate. The direction of effect was  
14 consistent. The magnitude of statistical heterogeneity was low (e.g.  $I^2 > 0\%$ )  
15 h. Serious. Magnitude of median study sample size was low (<100 participants) and does not meet pre-specified criteria for number of participants for pooled data (>500  
16 participants per trial arm). Number of included studies was moderate (e.g. 5-10 studies); Outcome was a common event (e.g. >1/100). We downgraded (-1).  
17 i. No - effect not large. The RR = 2.89 and greater than >2.0 or <0.5 generally considered large. However, there was not consistent evidence from at least 2 large studies  
18 and there were plausible confounders, so we did not upgrade  
19  
20  
21  
22  
23  
24  
25  
26  
27  
28  
29  
30  
31  
32  
33  
34  
35  
36  
37  
38  
39  
40  
41  
42  
43  
44  
45  
46

**TENS versus No Treatment**

TENS versus no treatment (waiting list control) for pain intensity at last during or first post intervention measurement point

| Certainty assessment             |              |               |              |             |                  |                               | Summary of findings                      |           |                          |                                               |                           |
|----------------------------------|--------------|---------------|--------------|-------------|------------------|-------------------------------|------------------------------------------|-----------|--------------------------|-----------------------------------------------|---------------------------|
| Participants (studies) Follow up | Risk of bias | Inconsistency | Indirectness | Imprecision | Publication bias | Overall certainty of evidence | Study event rates (%)                    |           | Relative effect (95% CI) | Anticipated absolute effects                  |                           |
|                                  |              |               |              |             |                  |                               | With No treatment (waiting list control) | With TENS |                          | Risk with No treatment (waiting list control) | Risk difference with TENS |

Pain Intensity Rating - last during or first post intervention

|               |                          |                      |                          |                      |                                                                     |             |     |     |   |   |                                              |
|---------------|--------------------------|----------------------|--------------------------|----------------------|---------------------------------------------------------------------|-------------|-----|-----|---|---|----------------------------------------------|
| 602 (10 RCTs) | not serious <sup>a</sup> | serious <sup>b</sup> | not serious <sup>c</sup> | serious <sup>d</sup> | publication bias strongly suspected strong association <sup>e</sup> | ⊕⊕○○<br>LOW | 304 | 298 | - | - | SMD 0.82 SD lower (1.18 lower to 0.46 lower) |
|---------------|--------------------------|----------------------|--------------------------|----------------------|---------------------------------------------------------------------|-------------|-----|-----|---|---|----------------------------------------------|

CI: Confidence interval; RR: Risk ratio; SMD: Standardised mean difference

**Explanations**

- a. Not serious. We did not downgrade because overall RoB was low or unclear except for sample size. Possibility that participants know they are not receiving treatment in some studies.
- b. Serious. Point estimates did not vary widely; Confidence intervals had substantial overlap (all confidence intervals overlap at least one of the included studies point estimate); The direction of effect was consistent; The magnitude of statistical heterogeneity was high (e.g. I2 >60%). We downgraded (-1)
- c. Not serious. We did not rate down because the populations and interventions in included studies were highly applicable. The outcome was directly measured and in a sufficient timeframe. The conclusions were based on direct comparisons
- d. Serious. Pooled data sample size does NOT meet pre-specified (e.g. 500 participants per trial arm). Magnitude of median study sample size was low (<100 participants); Number of included studies was high (>10 studies); Overall effect estimate confidence intervals showing the possibility of an effect above the threshold of important benefit. We downgraded (-1) because pooled data sample size does NOT meet pre-specified
- e. Strongly suspected. Egger's regression test showed significant evidence of a small-study effect (p = 0.0878). However, Trim and fill analysis showed no evidence of publication bias. We downgraded for the small study effect (-1)

**TENS versus Standard of Care (SoC)**

TENS versus treatment(s) used as part of standard of care for pain intensity at last during or first post intervention measurement point

| Certainty assessment                |                          |                      |                          |                          |                                                    |                               | Summary of findings   |           |                          |                              |                                             |
|-------------------------------------|--------------------------|----------------------|--------------------------|--------------------------|----------------------------------------------------|-------------------------------|-----------------------|-----------|--------------------------|------------------------------|---------------------------------------------|
| Participants (studies)<br>Follow up | Risk of bias             | Inconsistency        | Indirectness             | Imprecision              | Publication bias                                   | Overall certainty of evidence | Study event rates (%) |           | Relative effect (95% CI) | Anticipated absolute effects |                                             |
|                                     |                          |                      |                          |                          |                                                    |                               | With Standard of Care | With TENS |                          | Risk with Standard of Care   | Risk difference with TENS                   |
| Pain Intensity Rating               |                          |                      |                          |                          |                                                    |                               |                       |           |                          |                              |                                             |
| 3155 (61 RCTs)                      | not serious <sup>c</sup> | serious <sup>d</sup> | not serious <sup>a</sup> | not serious <sup>e</sup> | publication bias strongly suspected <sup>b,f</sup> | ⊕⊕○○<br>LOW                   | 1561                  | 1594      | -                        | -                            | SMD 0.72 SD lower (0.95 lower to 0.5 lower) |

CI: Confidence interval; RR: Risk ratio; SMD: Standardised mean difference

**Explanations**

- a. Not serious. We did not rate down because the populations and interventions in included studies were highly applicable. The outcome was directly measured and in a sufficient timeframe. The conclusions were based on direct comparisons.
- b. Strongly suspected. Visual inspection of Funnel plots suggested asymmetry. Egger's regression test showed significant evidence of a small-study effect (p = 0.0062). Trim and fill analysis showed evidence of publication bias, indicating that 11 trials might be missing to left of mean for an adjusted SMD of -1.032 (-1.31, -0.76) further increasing the effect size (random-effects model). We downgraded (-1) due to small study effect
- c. Not serious. We did not rate down because overall RoB was low or unclear except for sample size. We did not downgrade
- d. Serious. Point estimates varied moderately; Generally, confidence intervals overlapped, although not all overlapped at least one-point estimate. The direction of effect was consistent; The magnitude of statistical heterogeneity was high (e.g. I2 >60%). We downgraded (-1)
- e. Not serious. We did not rate down because the pooled data sample size does meet pre-specified (e.g. 500 participants per trial arm). Magnitude of median study sample size was low (<100 participants); Number of included studies was high (>10 studies); Overall effect estimate confidence intervals showing the possibility of an effect above threshold. We did not downgrade but Egger's test noted a small study effect which was accounted for under Publication Bias
- f. No large effect. SMD categorised as moderate effect size by Cohen's d. Not upgraded

MetaTENS\_SupplementaryAppendix\_FINAL\_23-12-2020

1  
2  
3  
4  
5  
6  
7  
8  
9  
10  
11  
12  
13  
14  
15  
16  
17  
18  
19  
20  
21  
22  
23  
24  
25  
26  
27  
28  
29  
30  
31  
32  
33  
34  
35  
36  
37  
38  
39  
40  
41  
42  
43  
44  
45  
46

***TENS versus Other Treatment***

We did not GRADE

For peer review only

**High Frequency versus Low Frequency TENS**

High versus low frequency TENS for pain intensity at last during or first post intervention measurement point

| Certainty assessment             |              |               |              |             |                  |                               | Summary of findings     |                          |                          |                              |                                          |
|----------------------------------|--------------|---------------|--------------|-------------|------------------|-------------------------------|-------------------------|--------------------------|--------------------------|------------------------------|------------------------------------------|
| Participants (studies) Follow up | Risk of bias | Inconsistency | Indirectness | Imprecision | Publication bias | Overall certainty of evidence | Study event rates (%)   |                          | Relative effect (95% CI) | Anticipated absolute effects |                                          |
|                                  |              |               |              |             |                  |                               | With Low Frequency TENS | With High Frequency TENS |                          | Risk with Low Frequency TENS | Risk difference with High Frequency TENS |

**Pain Intensity Rating**

|               |                          |                          |                          |                      |                     |                  |     |     |   |   |                                            |
|---------------|--------------------------|--------------------------|--------------------------|----------------------|---------------------|------------------|-----|-----|---|---|--------------------------------------------|
| 468 (13 RCTs) | not serious <sup>a</sup> | not serious <sup>b</sup> | not serious <sup>c</sup> | serious <sup>d</sup> | none <sup>e,f</sup> | ⊕⊕⊕○<br>MODERATE | 233 | 235 | - | - | SMD 0.19 lower (0.43 lower to 0.06 higher) |
|---------------|--------------------------|--------------------------|--------------------------|----------------------|---------------------|------------------|-----|-----|---|---|--------------------------------------------|

**Reduction of pain intensity of 50% or more**

|              |                          |                          |                          |                           |                                                    |                  |               |               |                        |               |                                                 |
|--------------|--------------------------|--------------------------|--------------------------|---------------------------|----------------------------------------------------|------------------|---------------|---------------|------------------------|---------------|-------------------------------------------------|
| 186 (4 RCTs) | not serious <sup>a</sup> | not serious <sup>b</sup> | not serious <sup>c</sup> | very serious <sup>g</sup> | publication bias strongly suspected <sup>e,f</sup> | ⊕○○○<br>VERY LOW | 39/92 (42.4%) | 28/94 (29.8%) | RR 0.72 (0.49 to 1.05) | 424 per 1,000 | 119 fewer per 1,000 (from 216 fewer to 21 more) |
|--------------|--------------------------|--------------------------|--------------------------|---------------------------|----------------------------------------------------|------------------|---------------|---------------|------------------------|---------------|-------------------------------------------------|

CI: Confidence interval; RR: Risk ratio; SMD: Standardised mean difference

**Explanations**

- a. Not serious. We did not rate down because overall RoB was generally low or unclear except for sample size which was accounted for in imprecision.
- b. Not serious. We did not rate down because point estimates varied moderately; Generally, confidence intervals overlapped. The direction of effect was consistent; The magnitude of statistical heterogeneity was low (e.g. I2 <40%)
- c. Not serious. We did not rate down because the populations and interventions in included studies were highly applicable. The outcome was directly measured and in a sufficient timeframe. The conclusions were based on direct comparisons

- d. Serious. Pooled data sample size does NOT meet pre-specified threshold (e.g. 500 participants per trial arm). Magnitude of median study sample size was low (<100 participants); Number of included studies was high (>10 studies); Overall effect estimate confidence intervals showing the possibility of no difference in effect. We downgraded (-1)
- e. Undetected. Visual inspection of Funnel plots suggested symmetry. Egger's regression test showed no significant evidence of a small-study effect (p = 0.8871). Trim and fill analysis showed no evidence of publication bias. We did not downgrade
- f. No large effect so we did not upgrade
- g. Very serious. Pooled data sample size does not meet pre-specified threshold (e.g. 500 participants per trial arm). Magnitude of median study sample size was low (<100 participants); Number of included studies was low (<10 studies); Overall effect estimate confidence intervals showing the possibility of no effect above the threshold of important benefit. We downgraded (-2)

For peer review only

**Adverse events**

TENS compared with comparator for adverse events irrespective of severity

| Certainty assessment             |              |               |              |             |                  |                               | Summary of findings   |           |                          |                              |                           |
|----------------------------------|--------------|---------------|--------------|-------------|------------------|-------------------------------|-----------------------|-----------|--------------------------|------------------------------|---------------------------|
| Participants (studies) Follow up | Risk of bias | Inconsistency | Indirectness | Imprecision | Publication bias | Overall certainty of evidence | Study event rates (%) |           | Relative effect (95% CI) | Anticipated absolute effects |                           |
|                                  |              |               |              |             |                  |                               | With Comparator       | With TENS |                          | Risk with Comparator         | Risk difference with TENS |

Proportion of participants experiencing adverse events irrespective of severity - all comparators

|                |                           |                          |                           |                      |                                                  |                  |                |               |                        |               |                                               |
|----------------|---------------------------|--------------------------|---------------------------|----------------------|--------------------------------------------------|------------------|----------------|---------------|------------------------|---------------|-----------------------------------------------|
| 1587 (18 RCTs) | very serious <sup>a</sup> | not serious <sup>b</sup> | very serious <sup>c</sup> | serious <sup>d</sup> | publication bias strongly suspected <sup>e</sup> | ⊕○○○<br>VERY LOW | 95/782 (12.1%) | 63/805 (7.8%) | RR 0.73 (0.36 to 1.48) | 121 per 1,000 | 33 fewer per 1,000 (from 78 fewer to 58 more) |
|----------------|---------------------------|--------------------------|---------------------------|----------------------|--------------------------------------------------|------------------|----------------|---------------|------------------------|---------------|-----------------------------------------------|

CI: Confidence interval; RR: Risk ratio

**Explanations**

a. Very serious (-2). Adverse events were generally capture by spontaneous observation rather than through formal study design.

b. Not serious. We did not rate down because overall, there is consistency in the direction of results with some inconsistency in the estimates of the treatment effect

c. Very serious (-2). Most trials did not pre-specify formal measurement of AEs. The populations and interventions in included studies were highly applicable. The outcome was not directly measured, nor measured in a sufficient timeframe. The conclusions were often based on direct comparisons of spontaneous reports

d. Serious (-1). The event rate and trial sample sizes are very low. The optimal information size criterion for benefit was met (i.e. >500 participants per trial arm) but this needs to be substantially larger for harm

e. Strongly suspected. Visual inspection of Funnel plots suggested asymmetry and publication bias



MetaTENS\_SupplementaryAppendix\_FINAL\_23-12-2020

1  
2  
3  
4  
5  
6  
7  
8  
9  
10  
11  
12  
13  
14  
15  
16  
17  
18  
19  
20  
21  
22  
23  
24  
25  
26  
27  
28  
29  
30  
31  
32  
33  
34  
35  
36  
37  
38  
39  
40  
41  
42  
43  
44  
45  
46

For peer review only

## Plausibility of Findings

### Physiological Plausibility

Our findings are physiological plausible. There is long-standing evidence that TENS acts physiologically to neuromodulate central nociceptive transmission irrespective of pathophysiology or diagnosis by selectively activating low threshold cutaneous primary afferents which reduces noxious evoked activity in central nociceptive transmission cells in both normal and sensitised states (see <sup>7,131</sup> for reviews). Therefore, TENS is used for symptomatic relief of pain rather than treatment (cure) of pathology in clinical practice.

### Clinical Plausibility

Our findings are consistent with expert opinion and clinical experience spanning more than 50 years, that TENS provides symptomatic relief of pain in a manner similar to 'soothing pain' by rubbing, warming or cooling the skin i.e. a therapeutic neuromodulation.

Our findings agree with expert opinion and clinical guidelines that TENS is safe and that adverse events are generally mild and restricted to minor skin reactions such as erythema and itchiness at the site of electrodes <sup>6,131-133</sup>.

Our findings that pain characteristics do not moderate the effect of TENS agree with research that has found no relationships between TENS outcome and type of pain <sup>102</sup> and that physiological action is via neuromodulation rather than curative (i.e. not dependent on pathology <sup>134,135</sup>).

Our findings that high or low frequency stimulation does not moderate the effect of strong but comfortable TENS is consistent with current clinical practice whereby patients are advised to tailor the electrical output characteristics of the device to maximise comfort accompanying a strong non-painful TENS sensation on a moment-to-moment basis if necessary.

There were few trials and participants to make confident judgements about treatment effects associated with neuropathic pain, and common musculoskeletal pains such as chronic non-specific low back and/or neck pain and osteoarthritis. This review provides evidence that suggests that there are minimal differences in treatment effects between specific conditions. There may, however, be differences in the context and practicalities of using TENS between specific conditions and populations of patients (e.g. elderly, cognitively challenged) that will influence whether TENS is indicated in clinical practice. For TENS we posit that context of pain, rather than pathology is more likely to predict outcome.

### Overall completeness and applicability of evidence

Our analysis supports treatment effects during and immediately post TENS. We did not attempt to analyse long-term follow-up following a course of treatment at this stage of the project. We are yet to conduct some pre-specified analyses on secondary outcomes including condition-specific pain-related outcomes (e.g. WOMAC, FIQ), health-related quality of life, including activities of daily living and fatigue, using any validated tool (e.g. Patient Global Impression of Change (PGIC), Short Form Health Survey (SF-36), EuroQol instruments) and participant-reported treatment satisfaction.

### Predominance of in-clinic RCTs

There was a predominance of RCTs undertaken in hospital settings with short term outcomes such as post-operative pain and procedural pain, with fewer studies on chronic pain monitoring long term outcome from a long-term course of treatment. Methodological aspects of the study are logistically easier to manage and control in hospital settings than home trials whereby participants are using

1  
2  
3 TENS to self-manage pain. Consequently, these RCTs tended to be judged as having lower risk of  
4 bias.  
5

### 6 **Paucity of long-term follow-up**

7 There was a scarcity of trials with long-term follow-up of say 6 months after treatment had ceased.  
8 Interpreting the findings of these types of trials needs careful consideration. The effects of TENS are  
9 maximal during or immediately after stimulation so a significant gap between the end of a course of  
10 TENS treatment and follow-up measurements may bias towards observing no treatment effect.  
11 Trials with a significant gap between the end of a course of TENS treatment and follow-up may  
12 detect resolution of pain and/or behaviour changes such as reducing fear-avoidance of movement  
13 pain resulting in increased physical activity that may have been catalysed by a course of TENS  
14 treatment or by a wide range of other factors.  
15  
16

### 17 **Paucity of RCTs on prevalent chronic pain conditions**

18 There were too few trials to make confident judgements about treatment effects associated with  
19 neuropathic pain, and common types of chronic musculoskeletal pain such as non-specific low back  
20 and/or neck pain and osteoarthritis. Despite our review providing evidence that differences in TENS  
21 effects between specific conditions is minimal, we feel that a large scale long-term multi-centre trial  
22 for these common conditions would still be valuable. This is because differences in the context and  
23 practicalities of using TENS between specific conditions and populations of patients (e.g. elderly,  
24 cognitively challenged) that may influence whether TENS is indicated in clinical practice. It will also  
25 provide guideline panels with more confidence on which to make decisions about specific  
26 conditions.  
27  
28

### 29 **Follow-up analyses emerging from this review are:**

- 30  
31
- 32 • The effect of TENS on analgesic consumption based on the studies included in this review.
  - 33 • The effect of TENS versus 'TENS-like' devices that were excluded from this review (e.g.  
34 transcutaneous electrical acupoint stimulation, interferential currents, etc.). There are some  
35 systematic reviews that have recently undertaken similar analyses <sup>41,136,137</sup>.  
36  
37  
38  
39  
40  
41  
42  
43  
44  
45  
46  
47  
48  
49  
50  
51  
52  
53  
54  
55  
56  
57  
58  
59  
60

## Agreements and disagreements with other studies or reviews

As part of this review, we identified and characterised 145 previously published systematic reviews (32 Cochrane reviews) on effect of TENS on pain-related outcomes.

Our descriptive analysis found that statements of conclusion in previous systematic reviews tended toward inconclusive (70/145) or TENS being efficacious (51/145) for acute or chronic pain. Despite being comprehensive and robust in methodological approach, Cochrane reviews consistently report that there are insufficient trials and participants to undertake meta-analyses of pooled data on specific pain conditions.

The recent overview of Cochrane reviews on TENS for chronic pain<sup>138,139</sup> and neuropathic pain<sup>138,139</sup> did not pool data and were inconclusive. In our review we have argued against using a classical pathology-based categorisation of pain when appraising TENS at a gross level. Our subgroup analyses for common pain conditions such as labour pain, low back pain and osteoarthritis too few trials and participants to estimate treatment effects with certainty. This is consistent with previous reviews.

### ***Inconsistency in clinical guidelines***

At present, TENS is recommended as an adjunct to core treatment for osteoarthritis, rheumatoid arthritis<sup>132,140</sup>, but not for non-specific chronic low back pain<sup>141</sup> and intrapartum care (labour pain)<sup>142</sup>.

The inconsistency in National Institute for Health and Care Excellence guidelines has been due in part to insufficient data to make recommendations for specific pain conditions. We found that the magnitude of effect between different types of pain is not clinically relevant enabling data pooling from any type of pain. Our review has done this, and our findings should be considered in the development of future clinical guidelines, especially those that do not recommend TENS for specific pain conditions based on insufficient high quality RCTs on specific types of pain

### ***Cost-benefit***

Our review did not include a cost-benefit analysis, funders should be aware that previous analyses provide evidence that TENS equipment, running costs and follow-up clinical support is inexpensive and can reduce annual costs for chronic pain<sup>143</sup>, chronic low back pain without neurological involvement<sup>144,145</sup> and osteoarthritis of the knee<sup>146</sup>.

## Conclusions

The debate about the efficacy of TENS has been ongoing since the late 1960s. The novelty of our systematic review is that it is the first to pool all available TENS data for meta-analyses, irrespective of the type of pain.

In conclusion, TENS produces clinically important reductions in the intensity of acute or chronic pain during and immediately after treatment with minimal risk of adverse events. This is based on a review of 381 RCTs and 24532 participants at entry and various meta-analyses.

- There is moderate-certainty evidence of treatment effects in favour of TENS when compared with placebo based on data from 91 RCTs (92 samples, 4841 participants) with standardised mean difference [95% CI] for pain intensity of -0.96 [-1.14, -0.78]. This surpassed our threshold of magnitude for an important change in pain intensity in-line with IMMPACT criteria<sup>15</sup>.

- There is low-certainty evidence of treatment effects in favour of TENS when compared with no treatment (waiting list) controls.
- There is low-certainty evidence of treatment effects in favour of TENS when compared with, or added to, interventions that are considered by trial authors to be used fully or partly as standard of care (61 RCTs (61 samples, 3155 participants) with the standardised mean difference of -0.72 [-0.95, -0.50] in favour of TENS.
- There is moderate-certainty evidence of no difference in pain intensity between high and low frequency TENS.
- There is evidence from 381 RCTs that adverse events from TENS are minor and infrequent and not different from placebo, although the estimate of risk ratio had very-low certainty.

We have been judicious in our interpretation of our findings. We are confident in these conclusions because our findings are physiologically plausible and consistent with clinical expertise.

### **Implications for practice**

- TENS can produce clinically important reductions in pain intensity for people experiencing acute or chronic pain, with minimal risk of harm.
- There are no clinically important differences in reductions in pain intensity generated by TENS for different pain conditions (diagnosis) or type of tissue associated with pain.
- TENS should be a treatment option as an adjunct or as a stand-alone treatment for individuals experiencing any type of pain.

### **For people with pain**

- TENS is a safe pain-relieving treatment and can be used on its own or in combination with other treatments to reduce the intensity (soothe) acute or chronic pain.
- TENS produces a strong non painful TENS sensation within or close to the site of pain, so TENS needs to be administered frequently to maintain its pain-relieving effect.
- TENS equipment and running costs are relatively inexpensive and TENS can be self-administered either in hospital, clinic or home settings.

### **For clinicians**

- This review of 381 RCTs provides evidence that clinically meaningful reductions in pain intensity occur during or immediately after delivering strong non painful TENS close to the site of pain.
- There is evidence that the characteristics of pain (e.g. duration or type of pain) do not modify the effects of TENS so any type of pain may respond.
- There is evidence that whether the electrical characteristics of currents are high frequency or low frequency do not modify the effects of TENS.
- Patients may need to use TENS frequently in order to maintain an analgesic effect.

### **For policymakers**

- The findings provide evidence in support of clinical guidelines that recommend TENS as an adjunct to core treatment <sup>132,140</sup>.
- The findings provide evidence that the size of treatment effect between different types of pain is small, so efficacy is transferable to any type of pain. This should be considered in the development of clinical guidelines, especially those that do not recommend TENS for specific pain conditions based on insufficient high quality RCTs on specific types of pain, e.g. non-specific chronic low back pain <sup>141</sup> and intrapartum care (labour pain) <sup>142</sup>.
- The findings are consistent with physiological plausibility and with clinical experience and expertise in the field.

### **For funders**

- This review did not include a cost-benefit analysis. Previously published analyses provide evidence that TENS equipment, running costs and follow-up clinical support is inexpensive and can reduce annual costs for chronic pain<sup>143</sup>, chronic low back pain without neurological involvement<sup>144,145</sup> and osteoarthritis of the knee<sup>147</sup>.
- TENS is safe and inexpensive and should be available as a treatment option for the management of pain.

### Implications for research

This review should serve to

- Reduce production of systematic reviews on TENS for acute pain, chronic pain, or specific painful conditions unless there is novel angle and/or a dramatic increase in the volume of large multicentre randomised controlled trials.
- Justify a large scale multicentred RCT to assess TENS in a mixed population of chronic pain patients to add further confidence, or otherwise, to the precision of the findings reported in this review. We propose an Enriched Enrolment Randomised Withdrawal design to overcome many methodological issues encountered in RCTs on TENS<sup>148,149</sup>, *trial arm* sample sizes greater than 200 participants, and the use of methodological criteria for RCTs on TENS reported in<sup>112</sup>.
- Justify the need for pragmatic ecologically valid studies gathering real-world data about how best to integrate TENS into practice. Such findings can inform educational packages to train and support patients to self-administer TENS<sup>150-152</sup>.

### References in Supplementary Appendix

1. Johnson MI, Jones G, Paley CA, Wittkopf PG. The clinical efficacy of transcutaneous electrical nerve stimulation (TENS) for acute and chronic pain: a protocol for a meta-analysis of randomised controlled trials (RCTs). *Bmj Open* 2019; **9**(10): e029999.
2. Moher D, Shamseer L, Clarke M, et al. Preferred reporting items for systematic review and meta-analysis protocols (PRISMA-P) 2015 statement. *Syst Rev* 2015; **4**: 1.
3. Higgins J, Thomas J, Chandler J, et al. Cochrane Handbook for Systematic Reviews of Interventions. 2nd ed. Chichester (UK): John Wiley & Sons; 2019.
4. Guyatt GH, Oxman AD, Vist GE, et al. GRADE: an emerging consensus on rating quality of evidence and strength of recommendations. *BMJ* 2008; **336**(7650): 924-6.
5. Carbonario F, Matsutani L, Yuan S, Marques A. Effectiveness of high-frequency transcutaneous electrical nerve stimulation at tender points as adjuvant therapy for patients with fibromyalgia. *European Journal of Physical and Rehabilitation Medicine* 2013; **49**(2): 197-204.
6. Johnson M. Transcutaneous electrical nerve stimulation (TENS). Research to support clinical practice. Oxford, UK: Oxford University Press 2014.
7. Johnson MI. Transcutaneous electrical nerve stimulation. In: Watson T, Nussbaum EL, eds. *Electrophysical agents*. 13 ed: Elsevier; 2020: 264-95.
8. Rakel B, Cooper N, Adams HJ, et al. A new transient sham TENS device allows for investigator blinding while delivering a true placebo treatment. *Journal of pain* 2010; **11**(3): 230-8.
9. Sluka KA, Bjordal JM, Marchand S, Rakel BA. What Makes Transcutaneous Electrical Nerve Stimulation Work? Making Sense of the Mixed Results in the Clinical Literature. *Physical Therapy* 2013; **May 2**. [Epub ahead of print].
10. Deyo R, Walsh N, Schoenfeld L, Ramamurthy S. Can trials of physical treatments be blinded? The example of transcutaneous electrical nerve stimulation for chronic pain [see comments]. *Am J Phys Med Rehabil* 1990; **69** (1): 6-10.
11. Higgins J, Altman D, Gøtzsche P, et al. The Cochrane Collaboration's tool for assessing risk of bias in randomised trials. *BMJ* 2011; **343**: d5928.
12. Moore AR, Eccleston C, Derry S, et al. "Evidence" in chronic pain--establishing best practice in the reporting of systematic reviews. *Pain* 2010; **150**(3): 386-9.
13. Moore RA, Derry S, Wiffen PJ. Challenges in design and interpretation of chronic pain trials. *Br J Anaesth* 2013; **111**(1): 38-45.
14. Busse JW, Bartlett SJ, Dougados M, et al. Optimal Strategies for Reporting Pain in Clinical Trials and Systematic Reviews: Recommendations from an OMERACT 12 Workshop. *J Rheumatol* 2015.
15. Dworkin RH, Turk DC, Wyrwich KW, et al. Interpreting the clinical importance of treatment outcomes in chronic pain clinical trials: IMMEDIATE recommendations. *J Pain* 2008; **9**(2): 105-21.
16. Cohen J. *Statistical Power Analysis for the Behavioral Sciences*. 2 ed. Hillsdale, NJ: Earlbaum; 1988.
17. Peryer G, Golder, S, Junqueira, D, Vohra, S, Loke, Y.K. Adverse effects. In: Higgins JPT TJ, Chandler J, Cumpston M, Li T, Page MJ, Welch VA, ed. *Cochrane Handbook for Systematic Reviews of Interventions version 60 (updated July 2019)*: Cochrane, 2019. ; 2019.
18. Higgins JP, Thompson SG, Deeks JJ, Altman DG. Measuring inconsistency in meta-analyses. *BMJ* 2003; **327**(7414): 557-60.
19. Richardson M, Garner, P., Donegan, S. Interpretation of subgroup analyses in systematic reviews: A tutorial. *Clinical Epidemiology and Global Health* 2019; **7**: 192-8.
20. Moore RA, Moore OA, Derry S, McQuay HJ. Numbers needed to treat calculated from responder rates give a better indication of efficacy in osteoarthritis trials than mean pain scores. *Arthritis Res Ther* 2008; **10**(2): R39.



- 1
- 2
- 3
- 4 21. Cherian JJ, Harrison PE, Benjamin SA, Bhavne A, Harwin SF, Mont MA. Do the Effects of
- 5 Transcutaneous Electrical Nerve Stimulation on Knee Osteoarthritis Pain and Function Last? *J Knee*
- 6 *Surg* 2016; **29**(6): 497-501.
- 7 22. Cherian JJ, Kapadia BH, Bhavne A, et al. Use of Transcutaneous Electrical Nerve Stimulation
- 8 Device in Early Osteoarthritis of the Knee. *J Knee Surg* 2015; **28**(4): 321-7.
- 9 23. Cherian JJ, Kapadia BH, McElroy MJ, et al. Knee Osteoarthritis: Does Transcutaneous
- 10 Electrical Nerve Stimulation Work? *Orthopedics* 2016; **39**(1): e180-6.
- 11 24. Chesterton L, Van Der Windt DA, Sim J, et al. Transcutaneous electrical nerve stimulation for
- 12 the management of tennis elbow: A pragmatic randomized controlled trial. *Rheumatology (United*
- 13 *Kingdom)* 2013; **1**: i38.
- 14 25. Lewis M, Chesterton LS, Sim J, Mallen CD, Hay EM, van der Windt DA. An Economic
- 15 Evaluation of TENS in Addition to Usual Primary Care Management for the Treatment of Tennis
- 16 Elbow: Results from the TATE Randomized Controlled Trial. *PLoS One* 2015; **10**(8): e0135460.
- 17 26. Escortell-Mayor E, Riesgo-Fuertes R, Garrido-Elustondo S, et al. Primary care randomized
- 18 clinical trial: manual therapy effectiveness in comparison with TENS in patients with neck pain.
- 19 *Manual therapy* 2011; **16**(1): 66-73.
- 20 27. Escortell Mayor E, Lebrijo Perez G, Perez Martin Y, Asunsolo del Barco A, Riesgo Fuertes R,
- 21 Saa Requejo C. [Randomized clinical trial for primary care patients with neck pain: manual therapy
- 22 versus electrical stimulation]. *Atencion primaria* 2008; **40**(7): 337-43.
- 23 28. Oosterhof J, De Boo TM, Oostendorp RA, Wilder-Smith OH, Crul BJ. Outcome of
- 24 transcutaneous electrical nerve stimulation in chronic pain: short-term results of a double-blind,
- 25 randomised, placebo-controlled trial. *The journal of headache and pain* 2006; **7**(4): 196-205.
- 26 29. Oosterhof J, Samwel HJ, de Boo TM, Wilder-Smith OH, Oostendorp RA, Crul BJ. Predicting
- 27 outcome of TENS in chronic pain: a prospective, randomized, placebo controlled trial. *Pain* 2008;
- 28 **136**(1-2): 11-20.
- 29 30. Oosterhof J, Wilder-Smith OH, de Boo T, Oostendorp RA, Crul BJ. The Long-Term Outcome of
- 30 Transcutaneous Electrical Nerve Stimulation in the Treatment for Patients with Chronic Pain: A
- 31 Randomized, Placebo-Controlled Trial. *Pain Pract* 2012.
- 32 31. Oosterhof J, Wilder-Smith OH, Oostendorp RA, Crul BJ. Different mechanisms for the short-
- 33 term effects of real versus sham transcutaneous electrical nerve stimulation (TENS) in patients with
- 34 chronic pain: a pilot study. *J Pain Palliat Care Pharmacother* 2012; **26**(1): 5-12.
- 35 32. Pietrosimone BG, Saliba SA, Hart JM, Hertel J, Kerrigan DC, Ingersoll CD. Effects of
- 36 transcutaneous electrical nerve stimulation and therapeutic exercise on quadriceps activation in
- 37 people with tibiofemoral osteoarthritis. *The Journal of orthopaedic and sports physical therapy* 2011;
- 38 **41**(1): 4-12.
- 39 33. Pietrosimone BG, Saliba SA, Hart JM, Hertel J, Kerrigan DC, Ingersoll CD. Effects of
- 40 disinhibitory transcutaneous electrical nerve stimulation and therapeutic exercise on sagittal plane
- 41 peak knee kinematics and kinetics in people with knee osteoarthritis during gait: a randomized
- 42 controlled trial. *Clinical rehabilitation* 2010; **24**(12): 1091-101.
- 43 34. Chia Y, Arulkumaran S, Chua S, Ratnam S. Effectiveness of transcutaneous electric nerve
- 44 stimulator for pain relief in labour. *Asia Oceania J Obstet Gynaecol* 1990; **16**(2): 145-51.
- 45 35. Kayman-Kose S, Ario DT, Toktas H, et al. Transcutaneous electrical nerve stimulation (TENS)
- 46 for pain control after vaginal delivery and cesarean section. *The journal of maternal-fetal & neonatal*
- 47 *medicine : the official journal of the European Association of Perinatal Medicine, the Federation of*
- 48 *Asia and Oceania Perinatal Societies, the International Society of Perinatal Obstet* 2014; **27**(15):
- 49 1572-5.
- 50 36. Lin ML, Luo YJ, Hsu YM, et al. Randomized controlled trial Comparing of Analgesic
- 51 Effectiveness of TPRF and TENs in Clinical and Endocrinological Changes for Chronic Shoulder Pain;
- 52 2015.
- 53
- 54
- 55
- 56
- 57
- 58
- 59
- 60

- 1
  - 2
  - 3
  - 4
  - 5
  - 6
  - 7
  - 8
  - 9
  - 10
  - 11
  - 12
  - 13
  - 14
  - 15
  - 16
  - 17
  - 18
  - 19
  - 20
  - 21
  - 22
  - 23
  - 24
  - 25
  - 26
  - 27
  - 28
  - 29
  - 30
  - 31
  - 32
  - 33
  - 34
  - 35
  - 36
  - 37
  - 38
  - 39
  - 40
  - 41
  - 42
  - 43
  - 44
  - 45
  - 46
  - 47
  - 48
  - 49
  - 50
  - 51
  - 52
  - 53
  - 54
  - 55
  - 56
  - 57
  - 58
  - 59
  - 60
37. Lin ML, Chiu HW, Shih ZM, et al. Two Transcutaneous Stimulation Techniques in Shoulder Pain: transcutaneous Pulsed Radiofrequency (TPRF) versus Transcutaneous Electrical Nerve Stimulation (TENS): a Comparative Pilot Study. *Pain research & management* 2019; **2019**: 2823401.
38. Johnson M, Martinson M. Efficacy of electrical nerve stimulation for chronic musculoskeletal pain: a meta-analysis of randomized controlled trials. *Pain* 2007; **130**(1-2): 157-65.
39. Sawant A, Dadurka K, Overend T, Kremenutzky M. Systematic review of efficacy of TENS for management of central pain in people with multiple sclerosis. *Mult Scler Relat Disord* 2015; **4**(3): 219-27.
40. Kroelting P, Gross A, Graham N, et al. Electrotherapy for neck pain. *Cochrane Database Syst Rev* 2013; **8**: CD004251.
41. Zhu J, Xu Q, Zou R, et al. Distal acupoint stimulation versus peri-incisional stimulation for postoperative pain in open abdominal surgery: a systematic review and implications for clinical practice. *BMC Complement Altern Med* 2019; **19**(1): 192.
42. Zhou J, Dan Y, Yixian Y, et al. Efficacy of Transcutaneous Electronic Nerve Stimulation in Postoperative Analgesia After Pulmonary Surgery A Systematic Review and Meta-Analysis. *American Journal of Physical Medicine & Rehabilitation* 2020; **99**(3): 241-9.
43. Bjersa K, Andersson T. High frequency TENS as a complement for pain relief in postoperative transition from epidural to general analgesia after pancreatic resection. *Complementary therapies in clinical practice* 2014; **20**(1): 5-10.
44. Itoh K, Hirota S, Katsumi Y, Ochi H, Kitakoji H. A pilot study on using acupuncture and transcutaneous electrical nerve stimulation (TENS) to treat knee osteoarthritis (OA). *Chin Med* 2008; **3**: 2.
45. Itoh K, Itoh S, Katsumi Y, Kitakoji H. A pilot study on using acupuncture and transcutaneous electrical nerve stimulation to treat chronic non-specific low back pain. *Complementary therapies in clinical practice* 2009; **15**(1): 22-5.
46. Rutjes AW, Nuesch E, Sterchi R, et al. Transcutaneous electrostimulation for osteoarthritis of the knee. *Cochrane Database Syst Rev* 2009; (4): CD002823.
47. Wu LC, Weng PW, Chen CH, Huang YY, Tsuang YH, Chiang CJ. Literature Review and Meta-Analysis of Transcutaneous Electrical Nerve Stimulation in Treating Chronic Back Pain. *Reg Anesth Pain Med* 2018; **43**(4): 425-33.
48. Aydin S, Arioglu Aydin C, Batmaz G, Dansuk R. Effect of vaginal electrical stimulation on female sexual functions: a randomized study. *J Sex Med* 2015; **12**(2): 463-9.
49. Murina F, Felice R, Di Francesco S, Oneda S. Vaginal diazepam plus transcutaneous electrical nerve stimulation to treat vestibulodynia: A randomized controlled trial. *European journal of obstetrics, gynecology, and reproductive biology* 2018; **228**: 148-53.
50. Murina F, Bianco V, Radici G, Felice R, Di Martino M, Nicolini U. Transcutaneous electrical nerve stimulation to treat vestibulodynia: a randomised controlled trial. *Bjog* 2008; **115**(9): 1165-70.
51. Meechan JG, Gowans AJ, Welbury RR. The use of patient-controlled transcutaneous electronic nerve stimulation (TENS) to decrease the discomfort of regional anaesthesia in dentistry: Randomised controlled clinical trial. *Journal of Dentistry* 1998; **26**(5-6): 417-20.
52. Conn IG, Marshall AH, Yadav SN, Daly JC, Jaffer M. Transcutaneous electrical nerve stimulation following appendectomy: the placebo effect. *Annals of the Royal College of Surgeons of England* 1986; **68**(4): 191-2.
53. Quinton DN, Sloan JP, Theakstone J. Transcutaneous electrical nerve stimulation in acute hand infections. *Journal of hand surgery (Edinburgh, Scotland)* 1987; **12**(2): 267-8.
54. VanderArk GD, McGrath KA. Transcutaneous electrical stimulation in treatment of postoperative pain. *Am J Surg* 1975; **130**(3): 338-40.
55. Wang W, George S, Wilimas J. Transcutaneous electrical nerve stimulation treatment of sickle cell pain crises. *Acta Haematol* 1988; **80**(2): 99-102.
56. Alm W, Gold M, Weil L. Evaluation of transcutaneous electrical nerve stimulation (TENS) in podiatric surgery. *J Am Podiatry Assoc* 1979; **69**(9): 537-42.

- 1  
2  
3 57. Hanfy HM, El-Bigawy A. Effects of transcutaneous electrical nerve stimulation versus  
4 acupressure in the treatment of primary dysmenorrhea. *Bull Fac Phys Ther Cairo Univ* 2004; **9**: 2.  
5 58. Revadkar MT, Bhojwani TM. Comparison of the Effectiveness of Transcutaneous Electrical  
6 Nerve Stimulation (Tens) Vs. Interferential Therapy (Ift) for Relief of Pain in Primary Dysmenorrhea.  
7 *International Journal of Physiotherapy* 2019; **6**(6): 263-7.  
8 59. Borup L, Wurlitzer W, Hedegaard M, Kesmodel US, Hvidman L. Acupuncture as pain relief  
9 during delivery: a randomized controlled trial. *Birth* 2009; **36**(1): 5-12.  
10 60. Upton GA, Tinley P, Al-Aubaidy H, Crawford R. The influence of transcutaneous electrical  
11 nerve stimulation parameters on the level of pain perceived by participants with painful diabetic  
12 neuropathy: A crossover study. *Diabetes & metabolic syndrome* 2017; **11**(2): 113-8.  
13 61. Warke K, Al-Smadi J, Baxter GD, Walsh DM, Lowe-Strong AS. A double blind, placebo  
14 controlled, randomised, clinical trial investigating the efficacy of transcutaneous electrical nerve  
15 stimulation for low back pain in a multiple sclerosis population. *Multiple Sclerosis* 2004; **10**(7032):  
16 S107-S.  
17 62. Al-Smadi J, Warke K, Wilson I, et al. A pilot investigation of the hypoalgesic effects of  
18 transcutaneous electrical nerve stimulation upon low back pain in people with multiple sclerosis.  
19 *Clinical rehabilitation* 2003; **17**(7): 742-9.  
20 63. da Silva TFG, Suda EY, Marçulo CA, Paes FHS, Pinheiro GT. Comparison of transcutaneous  
21 electrical nerve stimulation and hydrotherapy effects on pain, flexibility and quality of life in patients  
22 with fibromyalgia. *Fisioterapia e Pesquisa* 2008; **15**(2): 118-24 7p.  
23 64. de Oliveira Guimaraes CS, Santos Tavares FC, Santos MN, et al. Transcutaneous electrical  
24 nerve stimulation and placental vascularization in cases of uterine blood flow restriction. *Fetal*  
25 *Pediatr Pathol* 2013; **32**(2): 88-96.  
26 65. Chiu TT, Hui-Chan CW, Chein G. A randomized clinical trial of TENS and exercise for patients  
27 with chronic neck pain. *Clinical rehabilitation* 2005; **19**(8): 850-60.  
28 66. Neighbours LE, Clelland J, Jackson JR, Bergman J, Orr J. Transcutaneous electrical nerve  
29 stimulation for pain relief in primary dysmenorrhea. *Clin J Pain* 1987; **3**(1): 17-22.  
30 67. Tsukayama H, Yamashita H, Amagai H, Tanno Y. Randomised controlled trial comparing the  
31 effectiveness of electroacupuncture and TENS for low back pain: a preliminary study for a pragmatic  
32 trial. *Acupunct Med* 2002; **20**(4): 175-80.  
33 68. Yoshimizu M, Teo AR, Ando M, Kiyohara K, Kawamura T. Relief of chronic shoulder and neck  
34 pain by electro-acupuncture and transcutaneous electrical nervous stimulation: A randomized  
35 crossover trial. *Medical Acupuncture* 2012; **24**(2): 97-103.  
36 69. Yurtkuran M, Kocagil T. TENS, electroacupuncture and ice massage: comparison of  
37 treatment for osteoarthritis of the knee. *Am J Acupunct* 1999; **27** (3-4): 133-40.  
38 70. Grimmer K. A controlled double blind study comparing the effects of strong burst mode  
39 TENS and High Rate TENS on painful osteoarthritic knees. *Australian Journal of Physiotherapy* 1992;  
40 **38**: 49-56.  
41 71. Hsieh RL, Lee WC. One-shot percutaneous electrical nerve stimulation vs. transcutaneous  
42 electrical nerve stimulation for low back pain: comparison of therapeutic effects. *Am J Phys Med*  
43 *Rehabil* 2002; **81**(11): 838-43.  
44 72. Bulut M, Özcan A, Çakan T, Mektas M, Çulha C. The Comparison of Effectiveness of TENS and  
45 Placebo TENS in Peripheral Neuropathic Pain in Patients with Type II Diabetes Mellitus. *Turkiye*  
46 *Klinikleri Journal of Medical Sciences* 2011; **31**(4): 913-8.  
47 73. Tilak M, Isaac SA, Fletcher J, et al. Mirror Therapy and Transcutaneous Electrical Nerve  
48 Stimulation for Management of Phantom Limb Pain in Amputees - A Single Blinded Randomized  
49 Controlled Trial. *Physiotherapy research international : the journal for researchers and clinicians in*  
50 *physical therapy* 2016; **21**(2): 109-15.  
51 74. Jensen JE, Conn RR, Hazelrigg G, Hewett JE. The use of transcutaneous neural stimulation  
52 and isokinetic testing in arthroscopic knee surgery. *Am J Sports Med* 1985; **13**(1): 27-33.  
53  
54  
55  
56  
57  
58  
59  
60

- 1
- 2
- 3
- 4 75. Nash T, Williams J, Machin D. TENS: does the type of stimulus really matter? *The Pain Clinic* 1990; **3**: 161-8.
- 5
- 6 76. Sherry E, Kitchener P, Smart R. A prospective randomized controlled study of VAX-D and
- 7 TENS for the treatment of chronic low back pain. *Neurol Res* 2001; **23**(7): 780-4.
- 8 77. Hughes S, Dailey P, Partridge C. Transcutaneous electrical nerve stimulation for labour
- 9 analgesia. *Anesthesia and Analgesia* 1988; **67**: S99.
- 10 78. Olsen MF, Elden H, Janson ED, Lilja H, Stener-Victorin E. A comparison of high- versus low-
- 11 intensity, high-frequency transcutaneous electric nerve stimulation for painful postpartum uterine
- 12 contractions. *Acta Obstet Gynecol Scand* 2007; **86**(3): 310-4.
- 13 79. Fagevik Olsen M, Bjorndahl S, Stahl A, Borjesson S, Sundemo A, Gutke A. Effects of high-
- 14 intensity high-frequency transcutaneous electric nerve stimulation in primary dysmenorrhea-a
- 15 randomised cross-over pilot study. *European Journal of Physiotherapy* 2019.
- 16 80. Platon B, Andrell P, Raner C, Rudolph M, Dvoretzky A, Mannheimer C. High-frequency, high-
- 17 intensity transcutaneous electrical nerve stimulation as treatment of pain after surgical abortion.
- 18 *Pain* 2010; **148**(1): 114-9.
- 19 81. Platon B, Mannheimer C, Andrell P. Effects of high-frequency, high-intensity transcutaneous
- 20 electrical nerve stimulation versus intravenous opioids for pain relief after gynecologic laparoscopic
- 21 surgery: a randomized controlled study. *Korean Journal of Anesthesiology* 2018; **71**(2): 149-56.
- 22 82. Sadala AY, Machado AFP, Liebano RE. Effects of transcutaneous electrical nerve stimulation
- 23 on pain intensity during application of carboxytherapy in patients with cellulite: A randomized
- 24 placebo-controlled trial. *Journal of cosmetic dermatology* 2018; **17**(6): 1175-81.
- 25 83. Nash TP, Williams JD, Machin D. TENS: Does the type of stimulus really matter? *Pain Clinic*
- 26 1990; **3**(3): 161-8.
- 27 84. Dailey DL, Rakel BA, Vance CGT, et al. Transcutaneous electrical nerve stimulation reduces
- 28 pain, fatigue and hyperalgesia while restoring central inhibition in primary fibromyalgia. *Pain* 2013;
- 29 **154**(11): 2554-62.
- 30 85. Rakel BA, Zimmerman MB, Geasland K, et al. Transcutaneous electrical nerve stimulation for
- 31 the control of pain during rehabilitation after total knee arthroplasty: A randomized, blinded,
- 32 placebo-controlled trial. *Pain* 2014; **155**(12): 2599-611.
- 33 86. Tsen LC, Thomas J, Segal S, Datta S, Bader AM. Transcutaneous electrical nerve stimulation
- 34 does not augment epidural labor analgesia. *J Clin Anesth* 2001; **13**(8): 571-5.
- 35 87. Amer-Cuenca JJ, Goicoechea C, Girona-Lopez A, et al. Pain relief by applying transcutaneous
- 36 electrical nerve stimulation (TENS) during unsedated colonoscopy: a randomized double-blind
- 37 placebo-controlled trial. *Eur J Pain* 2011; **15**(1): 29-35.
- 38 88. Atamaz FC, Durmaz B, Baydar M, et al. Comparison of the efficacy of transcutaneous
- 39 electrical nerve stimulation, interferential currents, and shortwave diathermy in knee osteoarthritis:
- 40 a double-blind, randomized, controlled, multicenter study. *Archives of Physical Medicine and*
- 41 *Rehabilitation* 2012; **93**(5): 748-56.
- 42 89. Dailey DL, Vance CGT, Rakel BA, et al. Transcutaneous Electrical Nerve Stimulation Reduces
- 43 Movement-Evoked Pain and Fatigue: A Randomized, Controlled Trial. *Arthritis & rheumatology*
- 44 *(Hoboken, NJ)* 2020; **72**(5): 824-36.
- 45 90. Baez-Suarez A, Martin-Castillo E, Garcia-Andujar J, Garcia-Hernandez JA, Quintana-
- 46 Montesdeoca MP, Loro-Ferrer JF. Evaluation of different doses of transcutaneous nerve stimulation
- 47 for pain relief during labour: a randomized controlled trial. *Trials* 2018; **19**(1): 652-2.
- 48 91. Palmer S, Domaille M, Cramp F, et al. Transcutaneous electrical nerve stimulation as an
- 49 adjunct to education and exercise for knee osteoarthritis: a randomized controlled trial. *Arthritis*
- 50 *Care Res (Hoboken)* 2014; **66**(3): 387-94.
- 51 92. Borup L, Wurlitzer W, Hedegaard M, Kesmodel US, Hvidman L. Acupuncture as pain relief
- 52 during delivery: a randomized controlled trial. *Birth (berkeley, calif)* 2009; **36**(1): 5-12.
- 53 93. Pietrosimone B, Luc-Harkey BA, Harkey MS, et al. Using TENS to Enhance Therapeutic
- 54 Exercise in Individuals with Knee Osteoarthritis. *Medicine and science in sports and exercise* 2020.
- 55
- 56
- 57
- 58
- 59
- 60



- 1
- 2
- 3
- 4 94. Lison JF, Amer-Cuenca JJ, Piquer-Marti S, Benavent-Caballer V, Bivia-Roig G, Marin-Buck A. Transcutaneous Nerve Stimulation for Pain Relief During Office Hysteroscopy: A Randomized
- 5 Controlled Trial. *Obstetrics and gynecology* 2017; **129**(2): 363-70.
- 6
- 7 95. Thomas IL, Tyle V, Webster J, Neilson A. An evaluation of transcutaneous electrical nerve
- 8 stimulation for pain relief in labour. *The Australian & New Zealand journal of obstetrics &*
- 9 *gynaecology* 1988; **28**(3): 182-9.
- 10
- 11 96. Dailey DL, Vance CGT, Rakel BA, et al. Transcutaneous Electrical Nerve Stimulation Reduces
- 12 Movement-Evoked Pain and Fatigue: A Randomized, Controlled Trial. *Arthritis Rheumatol* 2020;
- 13 **72**(5): 824-36.
- 14
- 15 97. Moore SR, Shurman J. Combined neuromuscular electrical stimulation and transcutaneous
- 16 electrical nerve stimulation for treatment of chronic back pain: a double-blind, repeated measures
- 17 comparison. *Archives Of Physical Medicine And Rehabilitation* 1997; **78** (1): 55-60.
- 18
- 19 98. Rakel B, Frantz R. Effectiveness of transcutaneous electrical nerve stimulation on
- 20 postoperative pain with movement. *J Pain* 2003; **4**(8): 455-64.
- 21
- 22 99. Barbarisi M, Pace MC, Passavanti MB, et al. Pregabalin and transcutaneous electrical nerve
- 23 stimulation for postherpetic neuralgia treatment. *Clinical Journal of Pain* 2010; **26**(7): 567-72.
- 24
- 25 100. Luchesa CA, Greca FH, Guarita-Souza LC, dos Santos JL, Aquim EE. The role of
- 26 electroanalgesia in patients undergoing coronary artery bypass surgery. *Revista brasileira de cirurgia*
- 27 *cardiovascular : orgao oficial da Sociedade Brasileira de Cirurgia Cardiovascular* 2009; **24**(3): 391-6.
- 28
- 29 101. Sbruzzi G, Silveira SA, Silva DV, Coronel CC, Plentz RDM. Transcutaneous electrical nerve
- 30 stimulation after thoracic surgery: Systematic review and metaanalysis of randomized trials.
- 31 *Brazilian Journal of Cardiovascular Surgery* 2012; **27**(1): 75-87.
- 32
- 33 102. Johnson MI, Ashton CH, Thompson JW. An in-depth study of long-term users of
- 34 transcutaneous electrical nerve stimulation (TENS). Implications for clinical use of TENS. *Pain* 1991;
- 35 **44**(3): 221-9.
- 36
- 37 103. Cheing GLY, Hui-Chan CWY. Transcutaneous electrical nerve stimulation: Nonparallel
- 38 antinociceptive effects on chronic clinical pain and acute experimental pain. *Archives of Physical*
- 39 *Medicine and Rehabilitation* 1999; **80**(3): 305-12.
- 40
- 41 104. Ekblom A, Hansson P. Thermal sensitivity is not changed by acute pain or afferent
- 42 stimulation. *J Neurol Neurosurg Psychiatry* 1987; **50**(9): 1216-20.
- 43
- 44 105. Hansson P, Ekblom A. Transcutaneous electrical nerve stimulation (TENS) as compared to
- 45 placebo TENS for the relief of acute oro-facial pain. *Pain* 1983; **15**(2): 157-65.
- 46
- 47 106. Lee JE, Anderson CM, Perkhounkova Y, Sleenwenhoek BM, Louison RR. Transcutaneous
- 48 Electrical Nerve Stimulation Reduces Resting Pain in Head and Neck Cancer Patients: a Randomized
- 49 and Placebo-Controlled Double-Blind Pilot Study. *Cancer nursing* 2019; **42**(3): 218-28.
- 50
- 51 107. Dailey DL, Rakel BA, Vance CG, et al. Transcutaneous electrical nerve stimulation reduces
- 52 pain, fatigue and hyperalgesia while restoring central inhibition in primary fibromyalgia. *Pain* 2013;
- 53 **154**(11): 2554-62.
- 54
- 55 108. Dawood MY, Ramos J. Transcutaneous electrical nerve stimulation (TENS) for the treatment
- 56 of primary dysmenorrhea: a randomized crossover comparison with placebo TENS and ibuprofen.
- 57 *Obstetrics and gynecology* 1990; **75** (4): 656-60.
- 58
- 59 109. Ghoname EA, Craig WF, White PF, et al. Percutaneous electrical nerve stimulation for low
- 60 back pain: a randomized crossover study. *JAMA* 1999; **281** (9): 818-23.
110. Lewis B, Lewis D, Cumming G. The comparative analgesic efficacy of transcutaneous electrical nerve stimulation and a non-steroidal anti-inflammatory drug for painful osteoarthritis. *Br J Rheumatol* 1994; **33**(5): 455-60.
111. Milsom I, Hedner N, Mannheimer C. A comparative study of the effect of high-intensity transcutaneous nerve stimulation and oral naproxen on intrauterine pressure and menstrual pain in patients with primary dysmenorrhea. *Am J Obstet Gynecol* 1994; **170**(1 Pt 1): 123-9.

- 1  
2  
3  
4  
5  
6  
7  
8  
9  
10  
11  
12  
13  
14  
15  
16  
17  
18  
19  
20  
21  
22  
23  
24  
25  
26  
27  
28  
29  
30  
31  
32  
33  
34  
35  
36  
37  
38  
39  
40  
41  
42  
43  
44  
45  
46  
47  
48  
49  
50  
51  
52  
53  
54  
55  
56  
57  
58  
59  
60
112. Bennett MI, Hughes N, Johnson MI. Methodological quality in randomised controlled trials of transcutaneous electric nerve stimulation for pain: low fidelity may explain negative findings. *Pain* 2011; **152**(6): 1226-32.
113. Bjordal JM, Johnson MI, Ljunggreen AE. Transcutaneous electrical nerve stimulation (TENS) can reduce postoperative analgesic consumption. A meta-analysis with assessment of optimal treatment parameters for postoperative pain. *Eur J Pain* 2003; **7**(2): 181-8.
114. Ghoname ESA, White PF, Ahmed HE, Hamza MA, Craig WF, Noe CE. Percutaneous electrical nerve stimulation: an alternative to TENS in the management of sciatica. *Pain* 1999; **83**(2): 193-9.
115. Ozkul C, Kilinc M, Yildirim SA, Topcuoglu EY, Akyuz M. Effects of visual illusion and transcutaneous electrical nerve stimulation on neuropathic pain in patients with spinal cord injury: A randomised controlled cross-over trial. *Journal of back and musculoskeletal rehabilitation* 2015; **28**(4): 709-19.
116. Alvarez-Arenal A, Junquera LM, Fernandez JP, Gonzalez I, Olay S. Effect of occlusal splint and transcutaneous electric nerve stimulation on the signs and symptoms of temporomandibular disorders in patients with bruxism. *J Oral Rehabil* 2002; **29**(9): 858-63.
117. Arvidsson I, Eriksson E. Postoperative TENS pain relief after knee surgery: objective evaluation. *Orthopedics* 1986; **9**(10): 1346-51.
118. Gerson GR, Jones RB, Luscombe DK. Studies on the concomitant use of carbamazepine and clomipramine for the relief of post-herpetic neuralgia. *Postgraduate medical journal* 1977; **53** Suppl 4: 104-9.
119. Ghoname ES, Craig WF, White PF, et al. The effect of stimulus frequency on the analgesic response to percutaneous electrical nerve stimulation in patients with chronic low back pain. *Anesthesia and Analgesia* 1999; **88** (4): 841-6.
120. Lofgren M, Norrbrink C. Pain relief in women with fibromyalgia: a cross-over study of superficial warmth stimulation and transcutaneous electrical nerve stimulation. *J Rehabil Med* 2009; **41**(7): 557-62.
121. Lundeberg T. A comparative study of the pain alleviating effect of vibratory stimulation, transcutaneous electrical nerve stimulation, electroacupuncture and placebo. *Am J Chin Med* 1984; **12**(1-4): 72-9.
122. Robb K, Newham D, Williams J. Transcutaneous Electrical Nerve Stimulation vs. Transcutaneous Spinal Electroanalgesia for Chronic Pain Associated with Breast Cancer Treatments. *Journal of Pain and Symptom Management* 2007; **33**(4): 410-9.
123. Warke K, Al-Smadi J, Baxter D, Walsh D, Lowe-Strong A. Efficacy of transcutaneous electrical nerve stimulation (tens) for chronic low-back pain in a multiple sclerosis population: a randomized, placebo-controlled clinical trial. *Clinical Journal of Pain* 2006; **22**(9): 812-9.
124. Seo HG, Bang MS, Chung SG, Jung SH, Lee S-U. Effect of Electrical Stimulation on Botulinum Toxin A Therapy in Patients With Chronic Myofascial Pain Syndrome: A 16-Week Randomized Double-Blinded Study. *Archives of Physical Medicine & Rehabilitation* 2013; **94**(3): 412-8.
125. Vance CG, Dailey DL, Rakel BA, Sluka KA. Using TENS for pain control: the state of the evidence. *Pain Manag* 2014; **4**(3): 197-209.
126. Rowbotham MC, Gilron I, Glazer C, et al. Can pragmatic trials help us better understand chronic pain and improve treatment? *Pain* 2013; **154**(5): 643-6.
127. Moore S, Shurman J. Combined neuromuscular electrical stimulation and transcutaneous electrical nerve stimulation for treatment of chronic back pain: a double-blind, repeated measures comparison. *Arch Phys Med Rehabil* 1997; **78**(1): 55-60.
128. Grovle L, Hasvik E, Haugen AJ. Rescue and concomitant analgesics in placebo-controlled trials of pharmacotherapy for neuropathic pain and low back pain. *Pain* 2020; **161**(1): 3-10.
129. Fary RE, Briffa NK. Monophasic electrical stimulation produces high rates of adverse skin reactions in healthy subjects. *Physiother Theory Pract* 2011; **27**(3): 246-51.
130. Meader N, King K, Llewellyn A, et al. A checklist designed to aid consistency and reproducibility of GRADE assessments: development and pilot validation. *Syst Rev* 2014; **3**: 82.

- 1  
2  
3  
4  
5  
6  
7  
8  
9  
10  
11  
12  
13  
14  
15  
16  
17  
18  
19  
20  
21  
22  
23  
24  
25  
26  
27  
28  
29  
30  
31  
32  
33  
34  
35  
36  
37  
38  
39  
40  
41  
42  
43  
44  
45  
46  
47  
48  
49  
50  
51  
52  
53  
54  
55  
56  
57  
58  
59  
60
131. Sluka K, Walsh D. Chapter 8: Transcutaneous Electrical Nerve Stimulation and Interferential Therapy In: KA S, ed. Mechanisms and Management of Pain for the Physical Therapist. Second ed. Philadelphia, USA: IASP Press; 2016: 203-24.
  132. National Institute for Health and Care Excellence. Osteoarthritis: care and management. NICE guidelines [CG177] London, 2014.
  133. Houghton P, Nussbaum E, Hoens A. Electrophysical agents. Contraindications and Precautions: An Evidence-Based Approach to Clinical Decision Making in Physical Therapy. *Physiotherapy Canada* 2010; **62**(5): 5-80.
  134. DeSantana JM, Walsh DM, Vance C, Rakel BA, Sluka KA. Effectiveness of transcutaneous electrical nerve stimulation for treatment of hyperalgesia and pain. *Current rheumatology reports* 2008; **10**(6): 492-9.
  135. Johnson MI, Bjordal JM. Transcutaneous electrical nerve stimulation for the management of painful conditions: focus on neuropathic pain. *Expert Rev Neurother* 2011; **11**(5): 735-53.
  136. Almeida CC, Maldaner da Silva VZM, Cipriano Junior G, Liebano RE, Quagliotti Durigan JL. Transcutaneous electrical nerve stimulation and interferential current demonstrate similar effects in relieving acute and chronic pain: a systematic review with meta-analysis [with consumer summary]. *Brazilian Journal of Physical Therapy* 2018; **22**(5): 347-54.
  137. Page MJ, Green S, Mrocki MA, et al. Electrotherapy modalities for rotator cuff disease. *Cochrane Database Syst Rev* 2016; (6): CD012225.
  138. Gibson W, Wand BM, Meads C, Catley MJ, O'Connell NE. Transcutaneous electrical nerve stimulation (TENS) for chronic pain - an overview of Cochrane Reviews. *Cochrane Database Syst Rev* 2019; **2**: CD011890.
  139. Gibson W, Wand BM, O'Connell NE. Transcutaneous electrical nerve stimulation (TENS) for neuropathic pain in adults. *Cochrane Database Syst Rev* 2017; **9**: CD011976.
  140. National Institute for Health and Clinical Excellence. NICE clinical guideline 79 Rheumatoid arthritis: The management of rheumatoid arthritis in adults. London, 2009.
  141. National Institute for Health and Care Excellence N. Low back pain and sciatica in over 16s: assessment and management. Clinical guideline [NG59]. National Institute for Health and Care Excellence (NICE); 2016. p. 1-18.
  142. National Institute for Health and Clinical Excellence. NICE clinical guideline 55 Intrapartum care: care of healthy women and their babies during childbirth. London, 2007.
  143. Chabal C, Fishbain DA, Weaver M, Heine LW. Long-term transcutaneous electrical nerve stimulation (TENS) use: impact on medication utilization and physical therapy costs. *Clinical Journal of Pain* 1998; **14**(1): 66-73.
  144. Pivec R, Stokes M, Chitnis AS, Paulino CB, Harwin SF, Mont MA. Clinical and economic impact of TENS in patients with chronic low back pain: analysis of a nationwide database. *Orthopedics* 2013; **36**(12): 922-8.
  145. Pivec R, Minshall ME, Mistry JB, Chughtai M, Elmallah RK, Mont MA. Decreased Opioid Utilization and Cost at One Year in Chronic Low Back Pain Patients Treated with Transcutaneous Electric Nerve Stimulation (TENS). *Surg Technol Int* 2015; **27**: 268-74.
  146. Woods B, Manca A, Weatherly H, et al. Cost-effectiveness of adjunct non-pharmacological interventions for osteoarthritis of the knee. *PLoS One* 2017; **12**(3): e0172749.
  147. Ahn H, Woods AJ, Kunik ME, et al. Efficacy of transcranial direct current stimulation over primary motor cortex (anode) and contralateral supraorbital area (cathode) on clinical pain severity and mobility performance in persons with knee osteoarthritis: An experimenter- and participant-blinded, randomized, sham-controlled pilot clinical study. *Brain Stimul* 2017; **10**(5): 902-9.
  148. Johnson MI, Claydon LS, Herbison GP, Jones G, Paley CA. Transcutaneous electrical nerve stimulation (TENS) for fibromyalgia in adults. *Cochrane Database Syst Rev* 2017; **10**: CD012172.
  149. Johnson MI. Transcutaneous electrical nerve stimulation (TENS) as an adjunct for pain management in perioperative settings: a critical review. *Expert Rev Neurother* 2017; **17**(10): 1013-27.



- 1  
2  
3 150. Gozani S, Kong X. Real-world effectiveness of fixed-site highfrequency transcutaneous  
4 electrical nerve stimulation in chronic low back pain. *Postgraduate Medicine* 2018; **130 (Supplement**  
5 **1)**: 78-9.  
6 151. Gozani SN, Ferree TC, Moynihan M, Kong X. Impact of transcutaneous electrical nerve  
7 stimulation on sleep in chronic low back pain: a real-world retrospective cohort study. *Journal of*  
8 *Pain Research* 2019; **12**: 743-52.  
9 152. Gladwell PW, Cramp F, Palmer S. Matching the perceived benefits of Transcutaneous  
10 Electrical Nerve Stimulation (TENS) for chronic musculoskeletal pain against Patient Reported  
11 Outcome Measures using the International Classification of Functioning, Disability and Health (ICF).  
12 *Physiotherapy* 2020; **106**: 128-35.  
13  
14  
15  
16  
17  
18  
19  
20  
21  
22  
23  
24  
25  
26  
27  
28  
29  
30  
31  
32  
33  
34  
35  
36  
37  
38  
39  
40  
41  
42  
43  
44  
45  
46  
47  
48  
49  
50  
51  
52  
53  
54  
55  
56  
57  
58  
59  
60

For peer review only

08\_OL-TABLE1\_IncludedStudies

## ONLINETABLE1

## Summary Characteristics of included RCTs

| Reference                                | Design | Type | Condition                           | Sample size (women) | Primary TENS comparison                             | Comparison interventions                                                                                | TENS regimen                                         | Primary Outcome                                                      | Secondary Outcome                                           |
|------------------------------------------|--------|------|-------------------------------------|---------------------|-----------------------------------------------------|---------------------------------------------------------------------------------------------------------|------------------------------------------------------|----------------------------------------------------------------------|-------------------------------------------------------------|
| Abbasi et al., 2019 <sup>1</sup>         | P      | Pr   | Procedural - Throughout Pleurodesis | 66 (NR)             | TENS (HF) + Diclofenac = 33                         | Placebo TENS (0mA) + diclofenac = 33                                                                    | Fixed<br>1 x 50 mins during procedure                | Pain intensity (VAS)                                                 | Analgesic consumption<br>Blood pressure, heart rate         |
| Abelson et al., 1983 <sup>2</sup>        | P      | Pr   | Rheumatoid arthritis                | 32 (26W)            | TENS (HF) = 13                                      | Placebo TENS = 13 (0mA)                                                                                 | Fixed<br>1 x 15 mins / week x 3 weeks<br>3 sessions  | Pain intensity (VAS)<br>Resting pain<br>Pain on movement (grip task) | Grip strength                                               |
| Abreu et al., 2010 <sup>3</sup>          | P      | Pr   | Labour pain                         | 20 (20W)            | TENS (HF) = 10                                      | Placebo TENS = 10 (mA barely perceptible)                                                               | PRN during labour - first stage                      | Pain intensity (VAS)                                                 | Time to analgesia<br>Duration of analgesia                  |
| Acedo et al., 2015 <sup>4</sup>          | P      | Pr   | Neck pain - chronic non-specific    | 64 (64W)            | TENS (LF, burst, - 100pps) = 32                     | IFT = 32                                                                                                | Fixed<br>30 mins / day on days 2, 3, 5<br>3 sessions | Pain intensity (VAS)                                                 | Muscle relaxation (EMG microV)                              |
| Adedoyin et al., 2005 <sup>5</sup>       | P      | Pr   | Osteoarthritis - knee               | 46 (28W)            | TENS (HF) + Exercise = 15                           | IFT + Exercise = 16<br>Exercise alone (SoC, no TENS) = 15                                               | Fixed<br>2 x 20min / week x 4 weeks<br>8 sessions    | Pain intensity (NRS)                                                 | WOMAC                                                       |
| Ahmed, 2010 <sup>6</sup>                 | P      | Pr   | Post-op – inguinal hernia repair    | 60 (0W)             | TENS (HF) + paracetamol + diclofenac as needed = 30 | Placebo TENS (0mA) + paracetamol + diclofenac as needed = 30                                            | Fixed<br>2 x 30 mins / day x 5 days<br>10 sessions   | Pain intensity (VAS)                                                 | Analgesic consumption<br>Assessment of serum cortisol level |
| Ahmed et al., 2020 <sup>7</sup>          | P      | Pr   | Diabetic neuropathic pain           | 30 (19W)            | TENS (LF, AL-TENS) + aerobic exercise = 15          | Repetitive transcranial magnetic stimulation (rTMS) + aerobic exercise = 15                             | Fixed<br>1 x 20 mins / day x 5 days<br>10 sessions   | Pain intensity (VAS)                                                 | Blood β-endorphin level                                     |
| Alcidi et al., 2007 <sup>8</sup>         | P      | Pr   | Osteoarthritis - knee - acute       | 40 (35W)            | TENS (HF) = 20                                      | Electromagnetic radiation = 20                                                                          | Fixed<br>1 x 20 mins / day x 5 days<br>5 sessions    | Pain intensity (VAS)                                                 | Lequesne's index for knee OA                                |
| Ali et al., 1981 <sup>9</sup>            | P      | Pr   | Post-op – abdominal                 | 40 (24W)            | TENS (HF) + Demerol = 15                            | Placebo TENS (0mA) + Demerol = 10<br>Demerol + No TENS (SoC, no TENS) = 15                              | PRN<br>48h Post-operation                            | No primary outcome                                                   | Analgesic consumption<br>Vc FRc arterial PO2                |
| Alizade and Ahmadzad, 2009 <sup>10</sup> | P      | Pr   | Back pain – low, chronic            | 24 (24W)            | TENS (HF) + NSAIDs (ibuprofen and diclofenac) = 8   | NSAIDs (ibuprofen and diclofenac) + exercise = 8<br>NSAIDs (ibuprofen and diclofenac, SoC, no TENS) = 8 | Fixed<br>30 mins / day x 3 days / week x 5 weeks     | No primary outcome                                                   | Modified Oswestry low back pain disability questionnaire    |

08\_OL-TABLE1\_IncludedStudies

|                                               |   |    |                                                               |             |                                                                                                               |                                                                                                                                                                            |                                                                         |                                                     |                                                                                                                                                                                                         |
|-----------------------------------------------|---|----|---------------------------------------------------------------|-------------|---------------------------------------------------------------------------------------------------------------|----------------------------------------------------------------------------------------------------------------------------------------------------------------------------|-------------------------------------------------------------------------|-----------------------------------------------------|---------------------------------------------------------------------------------------------------------------------------------------------------------------------------------------------------------|
|                                               |   |    |                                                               |             |                                                                                                               |                                                                                                                                                                            | 15 sessions                                                             |                                                     |                                                                                                                                                                                                         |
| Allais et al., 2003 <sup>11</sup>             | P | Pr | Migraine - transformed                                        | 60 (60W)    | TENS (HF, MF, LF) = 20                                                                                        | Infrared laser therapy = 20<br>Acupuncture = 20                                                                                                                            | Fixed<br>30 mins / day x 5<br>day / week x 2<br>weeks<br>10 sessions    | No primary<br>outcome                               | Number of days with headache<br>per month                                                                                                                                                               |
| Alm et al., 1979 <sup>12</sup>                | P | E  | Post-op – podiatric<br>surgery                                |             | TENS (HF) = 50                                                                                                | Placebo TENS (0mA) = 25<br>Control Group (patient records) =<br>25                                                                                                         | PRN<br>Mean duration 20-40<br>mins / treatment<br>repeated              | Pain relief (4-<br>point category<br>scale)         | Analgesic consumption                                                                                                                                                                                   |
| Al-Smadi et al., 2003 <sup>13</sup>           | P | Pr | Back pain –<br>low, multiple sclerosis                        | 15 (n/r)    | TENS (HF) = 5<br>(110 Hz, 200 ms)                                                                             | Placebo TENS = 5<br>(0mA)<br>TENS (LF) = 5<br>(4Hz, 200 ms)                                                                                                                | Fixed<br>1 x 45min / day x 3<br>days / week x 6<br>weeks<br>18 sessions | Pain intensity<br>(VAS)                             | McGill Pain Questionnaire<br>Roland Morris Disability<br>Questionnaire<br>Leeds MS Specific Quality of<br>Life Questionnaire                                                                            |
| Altay et al., 2010 <sup>14</sup>              | P | Pr | Osteoarthritis - knee                                         | 40 (30W)    | TENS (HF) = 20                                                                                                | Placebo TENS = 20<br>(0mA)                                                                                                                                                 | Fixed<br>1 x 40 min / day x 3<br>weeks 21 sessions                      | Pain intensity<br>(VAS)                             | WOMAC<br>Beck Depression<br>Inventory<br>Short Form 36<br>10 steps stairs climbing up-down<br>time<br>6-minute walk distance                                                                            |
| Alvarez-Arenal et al.,<br>2002 <sup>15</sup>  | C | E  | Temporomandibular<br>disorder – bruxism                       | 24 (9W)     | TENS (LF) = 24                                                                                                | Splint = 24                                                                                                                                                                | Fixed<br>1 x 45-60 mins every<br>2 days<br>15 sessions                  | Pain intensity on<br>palpation (4-point<br>scale)   | Tenderness on palpation (4-point<br>scale)<br>Severity of TMD (pantographic<br>reproducibility<br>index -PRI)<br>Joint noises associated<br>with oral opening and closing<br>(number of 'click' noises) |
| Alves Silverio et al.,<br>2015 <sup>16</sup>  | P | Pr | Dysphonic –<br>Muscle tension                                 | 20 (20W)    | TENS (LF) = 10                                                                                                | Laryngeal manual therapy = 10                                                                                                                                              | Fixed<br>2 x 20mins / week x<br>6 weeks<br>12 sessions                  | Pain intensity<br>(VAS)                             | Nordic musculoskeletal symptoms<br>questionnaire<br>Vocal quality - auditory<br>perceptual analysis of voice.                                                                                           |
| Amer-Cuenca et al.,<br>2011 <sup>17</sup>     | P | Pr | Procedural pain –<br>colonoscopy                              | 90<br>(50W) | TENS (RF) = 30                                                                                                | Placebo TENS = 30<br>(0mA)<br>No treatment (unsedated) = 30                                                                                                                | Fixed<br>During procedure                                               | Pain intensity<br>(VAS and 5-point<br>Likert scale) | Unusual or adverse events                                                                                                                                                                               |
| AminiSaman et al.,<br>2020 <sup>18</sup>      | P | Pr | Procedural pain -<br>Needle insertion -<br>Spinal anaesthesia | 60 (25W)    | TENS (HF) = 30                                                                                                | Placebo TENS (0mA) = 30                                                                                                                                                    | Fixed<br>During needle<br>insertion procedure                           | Pain intensity<br>(VAS)                             | Number of attempts to insert<br>needle<br>Duration insertion time                                                                                                                                       |
| Angulo and Colwell Jr,<br>1990 <sup>19</sup>  | P | Pr | Post-op –<br>knee replacement                                 | 48 (28W)    | TENS (sensory threshold) +<br>continuous passive motion +<br>opioids as needed (SoC, No<br>TENS control) = 18 | Placebo TENS (active <SDT) +<br>continuous passive motion +<br>opioids as needed = 18<br>No TENS + continuous passive<br>motion + opioids as needed (SoC,<br>no TENS) = 12 | PRN<br>20 hours / day x 3<br>days                                       | Pain intensity<br>(VAS)                             | Analgesic consumption (Narcotic)<br>Knee flexion range of motion                                                                                                                                        |
| Ardic et al., 2002 <sup>20</sup>              | P | Pr | Myofascial pain                                               | 40 (36W)    | TENS (HF) + Exercise = 15                                                                                     | Exercises (SoC, no TENS) = 10<br>Electrical muscle stimulation +<br>Exercises = 15                                                                                         | Fixed<br>1 x 20mins / day x 2<br>weeks<br>14 sessions                   | Pain intensity<br>(VAS)                             | Pain threshold on palpation<br>Range of motion                                                                                                                                                          |
| Arvidsson and Eriksson,<br>1986 <sup>21</sup> | C | E  | Post-op –                                                     | 15(3W)      | TENS (HF) = 15                                                                                                | Placebo TENS = 15<br>(0mA)                                                                                                                                                 | Fixed<br>1 x 15-20 mins                                                 | Pain intensity (0-<br>20 Borg scale)                | Quadriceps contraction ability<br>(EMG)                                                                                                                                                                 |

08\_OL-TABLE1\_IncludedStudies

|                                        |   |    |                                                            |            |                                                                                     |                                                                                                                                                                                                                                            |                                                                                    |                                                           |                                                                                                                                                           |
|----------------------------------------|---|----|------------------------------------------------------------|------------|-------------------------------------------------------------------------------------|--------------------------------------------------------------------------------------------------------------------------------------------------------------------------------------------------------------------------------------------|------------------------------------------------------------------------------------|-----------------------------------------------------------|-----------------------------------------------------------------------------------------------------------------------------------------------------------|
|                                        |   |    | knee ACL reconstruction                                    |            |                                                                                     | Epidural injection (lidocaine 2.5ug/ml) = 15                                                                                                                                                                                               | 1 session                                                                          | Resting pain<br>Pain on movement (quadriceps contraction) |                                                                                                                                                           |
| Asgari et al., 2018 <sup>22</sup>      | P | Pr | Procedural pain – gynaecologic laparoscopy (shoulder pain) | 80 (80W)   | TENS (LF) = 40                                                                      | Fentanyl (SoC, no TENS) = 40                                                                                                                                                                                                               | Fixed 20 mins during procedure                                                     | Pain intensity (VAS)                                      | Analgesic consumption                                                                                                                                     |
| Atamaz et al., 2012 <sup>23</sup>      | P | Pr | Osteoarthritis - knee                                      | 203 (167W) | TENS (HF) + Exercise + Education = 37                                               | Placebo TENS + Exercise + Education = 37 (0mA)<br>IFT + Exercise + Education = 31<br>Placebo IFT + Exercise + Education = 35<br>Shortwave diathermy + Exercise + Education = 31<br>Placebo shortwave diathermy + Exercise + Education = 32 | Fixed 1 x 20 mins / day x 5 / week x 3 weeks<br>15 sessions                        | Pain intensity (VAS)                                      | Analgesic consumption (Paracetamol)<br>Pain free range of motion<br>Patient's satisfaction with the treatment (VAS)<br>WOMAC<br>Nottingham Health Profile |
| Aydin et al., 2005 <sup>24</sup>       | P | Pr | Spasticity – SCI, lower limb pain                          | 21 (15W)   | TENS (HF) + exercise (range of motion, every morning) = 11                          | Baclofen + exercise (range of motion, every morning) (SoC) = 10                                                                                                                                                                            | Fixed 1 x 15 min / day x 15 days<br>15 sessions                                    | Painful spasm scale (3-point scale)                       | Clinical assessment of spasticity - Self-reported and clinical examination<br>Electrophysiologic Assessment of Spasticity<br>H-reflex                     |
| Azatcam et al., 2017 <sup>25</sup>     | P | Pr | Myofascial pain                                            | 69 (38W)   | TENS (HF) + Exercise (Trapezius stretching) = 23                                    | Exercise (Trapezius stretching)(SoC, no TENS) = 23<br>Kinesiology taping + Exercise (Trapezius stretching) = 23                                                                                                                            | Fixed 1 x 20 mins / day x 5 days / week x 2 weeks<br>10 sessions                   | Pain intensity (VAS)                                      | Pain threshold (algometry)<br>Neck Disability Index<br>Cervical range of motion                                                                           |
| Báez-Suárez et al., 2018 <sup>26</sup> | P | Pr | Labour pain                                                | 63 (63W)   | TENS (HF) = 21                                                                      | Placebo TENS = 21 (0mA)<br>TENS (MF) = 21                                                                                                                                                                                                  | PRN >30 mins / treatment during labour                                             | Pain intensity (VAS)                                      | Care in Obstetrics Measure for Testing Satisfaction (COMFORTS) scale                                                                                      |
| Bai et al., 2017 <sup>27</sup>         | P | Pr | Dysmenorrhea                                               | 134 (134W) | TENS (AF) + Ibuprofen as needed = 67                                                | Placebo TENS (0mA) + ibuprofen as needed) = 67 (0mA)                                                                                                                                                                                       | Fixed 1 x 30 mins / day x 3 days x 3 menstrual cycles<br>9 sessions                | Pain intensity (NRS)                                      | Analgesic consumption (Ibuprofen)<br>Pain relief duration<br>World Health Organization quality of life (WHOQOL)-BREF                                      |
| Baki et al., 2015 <sup>28</sup>        | P | Pr | Post-op – thoracotomy                                      | 40 (15W)   | TENS (HF) + tramadol PCA = 20                                                       | Paravertebral block+ tramadol PCA = 20                                                                                                                                                                                                     | PRN 24 h post op                                                                   | Pain intensity (VAS)<br>• Resting pain<br>• During cough  | Analgesic consumption (Tramadol)<br>Respiratory function<br>FEV1, FEV1/FVC, mean arterial pressure, heart rate, saturation of oxygen                      |
| Ballegaard et al., 1985 <sup>29</sup>  | C | E  | Pancreatitis – chronic                                     | 16(NR)     | TENS (HF, conventional followed by LF, acupuncture-like) + morphine on request = 11 | Placebo TENS (NR) + morphine on request = 11                                                                                                                                                                                               | Fixed 1 x 30 mins / day x 1 week<br>7 sessions<br>Repeated at each of 3 body sites | Pain intensity (VAS)                                      | Analgesic consumption (Morphine)<br>Treatment preference<br>Daily assessment of well-being (VAS)                                                          |

08\_OL-TABLE1\_IncludedStudies

|                                            |   |    |                                                   |          |                                                          |                                                                               |                                                                              |                                                                                                  |                                                                                                                                                                                                                                                                                                                                                   |
|--------------------------------------------|---|----|---------------------------------------------------|----------|----------------------------------------------------------|-------------------------------------------------------------------------------|------------------------------------------------------------------------------|--------------------------------------------------------------------------------------------------|---------------------------------------------------------------------------------------------------------------------------------------------------------------------------------------------------------------------------------------------------------------------------------------------------------------------------------------------------|
|                                            |   |    |                                                   |          |                                                          |                                                                               | 21 sessions                                                                  |                                                                                                  |                                                                                                                                                                                                                                                                                                                                                   |
| Barbarisi et al., 2010 <sup>30</sup>       | P | Pr | Post herpetic neuralgia                           | 30 (15W) | TENS (HF) + Pregabalin = 16                              | Placebo TENS + Pregabalin (0mA) = 14                                          | Fixed<br>1 x 30 mins / day x 9 visits (over 4 weeks)<br>9 sessions           | Pain intensity (VAS)                                                                             | SF-McGill Pain Questionnaire<br>Sleep interference                                                                                                                                                                                                                                                                                                |
| Barker et al., 2006 <sup>31</sup>          | P | Pr | Pelvic pain – acute, during transport to hospital | 62 (62W) | TENS (HF) = 29                                           | Placebo TENS (0mA) = 33                                                       | PRN<br>~ 30 mins during transportation to hospital<br>1 session              | Pain intensity (VAS)                                                                             | Oscillometric blood pressure<br>Heart rate<br>Anxiety (VAS)<br>Signs of sympathetic Activity (vasoconstriction/dilation of arms)                                                                                                                                                                                                                  |
| Barker et al., 2008 <sup>32</sup>          | P | Pr | Back pain – low, chronic                          | 60 (30W) | TENS (HF) = 28                                           | Sensory discrimination training using FairMed device = 32                     | PRN<br>2 x 30 min / day x 3 weeks<br>21 sessions                             | Pain intensity (VAS)<br>• present pain<br>• average pain over a week<br>• worst pain over a week | Oswestry Disability Index<br>Functional physical tests<br>• 5-minute walking distance<br>• 1-minute stair climb<br>• 1 minute standing up and sitting down from a chair<br>Health Anxiety and Depression Scale<br>Tampa Scale Kinesiophobia<br>Pain Coping Scale<br>Pain Self Efficacy Questionnaire<br>Patient Global Impression of Change scale |
| Başkurt et al., 2006 <sup>33</sup>         | P | E  | Shoulder impingement - stage I                    | 92 (60W) | TENS (HF) = 30                                           | Heat (39°, SoC no TENS) = 31<br>Heat + TENS = 31                              | Fixed<br>1 x 20 mins<br>1 session                                            | Pain intensity (VAS)                                                                             | Pressure algometry (pressure pain threshold)                                                                                                                                                                                                                                                                                                      |
| Bayindir et al., 1991 <sup>34</sup>        | P | E  | Post-op – cardiac surgery                         | 89 (29W) | TENS (LF, burst) = 59                                    | Placebo TENS = 30 (0mA)                                                       | Fixed<br>1 x 180 mins                                                        | Pain intensity (VAS)                                                                             | None                                                                                                                                                                                                                                                                                                                                              |
| Beckwée et al., 2018 <sup>35</sup>         | P | Pr | Post-op – total knee arthroplasty                 | 53 (34W) | TENS (LF, burst) + analgesics + physiotherapy (SoC) = 25 | Placebo TENS + analgesics + physiotherapy (SoC) = 28 (0mA)                    | Fixed<br>1x 40 mins / day during passive mobilisation x 5 days<br>5 sessions | Pain intensity (VAS)                                                                             | Analgesic consumption<br>• Daily opioid analgesia<br>• cumulative opioid analgesia<br>• Non-opioid analgesia<br>Range of motion - Knee flexion                                                                                                                                                                                                    |
| Benedetti et al., 1997 <sup>36</sup>       | P | E  | Post-op – thoracic                                | 324 (NR) | TENS (HF) = 103                                          | Placebo TENS (0mA) = 106<br>Conventional drugs (SoC, no TENS) = 115 (Control) | Fixed<br>2 x 60 mins in recovery room first<br>12 h only<br>2 sessions       | Pain intensity (NRS)                                                                             | Analgesic consumption<br>Time to request further analgesia.                                                                                                                                                                                                                                                                                       |
| Bennett et al., 2010 <sup>37</sup>         | C | E  | Cancer bone pain                                  | 24 (6W)  | TENS (HF) = 24                                           | Placebo TENS = 24 (0mA)                                                       | Fixed<br>1 x 60 mins<br>1 session                                            | Pain intensity (NRS and VRS 4 categories)<br>• Resting pain<br>• Pain on movement                | SF-McGill Pain Questionnaire<br>Satisfaction questionnaire                                                                                                                                                                                                                                                                                        |
| Bergeron-Vezina et al., 2018 <sup>38</sup> | C | E  | Back pain – chronic, low, non-specific            | 21 (11W) | TENS (HF) = 21 (maintaining pulse amplitude)             | TENS (HF) = 21 (pulse amplitude fading)                                       | Fixed<br>1 x 25 mins<br>1 session                                            | Pain intensity (VAS)                                                                             | Pain unpleasantness (VAS)<br>Patient's Global Impression of Change scale                                                                                                                                                                                                                                                                          |

08\_OL-TABLE1\_IncludedStudies

|                                          |   |    |                                                    |            |                                                            |                                                                                                                                                                                              |                                                              |                                                                                       |                                                                                                                                                                                                                                                   |
|------------------------------------------|---|----|----------------------------------------------------|------------|------------------------------------------------------------|----------------------------------------------------------------------------------------------------------------------------------------------------------------------------------------------|--------------------------------------------------------------|---------------------------------------------------------------------------------------|---------------------------------------------------------------------------------------------------------------------------------------------------------------------------------------------------------------------------------------------------|
| Bertalanffy et al., 2005 <sup>39</sup>   | P | Pr | Back pain - acute, low, during emergency transport | 74 (30W)   | TENS (HF) = 35                                             | Placebo TENS = 36 (0mA)                                                                                                                                                                      | Fixed<br>1 x ~30 mins during transportation<br>1 session     | Pain intensity (VAS)                                                                  | Anxiety (VAS)<br>Oscillometric blood pressure<br>Heart rate                                                                                                                                                                                       |
| Bi et al., 2015 <sup>40</sup>            | P | Pr | Spinal cord injury                                 | 52 (16W)   | TENS (LF) = 26                                             | Placebo TENS = 26 (0mA)                                                                                                                                                                      | Fixed<br>1 x 20mins/day x 3 / week x 12 weeks<br>36 sessions | Pain intensity (VAS)                                                                  | McGill Pain Questionnaire                                                                                                                                                                                                                         |
| Bilgili et al., 2016 <sup>41</sup>       | P | Pr | Complex regional pain syndrome                     | 30 (16W)   | TENS (HF) + contrast bath + whirlpool bath + exercise = 15 | Placebo TENS (0mA) + contrast bath + whirlpool bath + exercise = 15                                                                                                                          | Fixed<br>1 x 20 mins / day x 15 days<br>15 sessions          | Pain intensity (VAS) at rest                                                          | LANSS<br>Douleur Neuropathique en 4 Questions (DN-4)<br>Volumetric oedema (mm)<br>Hand mobility (distance between the 2nd and 5th finger pulp and distal palmar line in cm)<br>Range of motion - wrist<br>Hand grip strength<br>Duruöz Hand Index |
| Binder et al., 2011 <sup>42</sup>        | P | Pr | Post-op – caesarean                                | 42 (42W)   | TENS (HF) + morphine PCA = 22                              | Morphine PCA (SoC, no TENS) = 20                                                                                                                                                             | PRN<br>Over 24 hours                                         | Pain intensity (VAS)                                                                  | Analgesic consumption (Morphine) - PCA<br>Sedation perception (VAS)                                                                                                                                                                               |
| Bjersa and Andersson, 2014 <sup>43</sup> | P | E  | Post-op – pancreatic surgery                       | 20 (N/R)   | TENS (HF) + SoC (medication) = 9                           | Placebo TENS = 11 (stimulation as low as possible) + SoC (medication)                                                                                                                        | PRN >30m/session                                             | Pain intensity (VAS)<br>• Resting (lying)<br>• On movement (walking + deep breathing) | Analgesic consumption (Morphine)<br>Quality of Recovery 40 (QoR-40)<br>EDA infusion rate (ml/h)<br>Total time of TENS usage in minutes during the day of EDA termination and the day after.                                                       |
| Bjersa et al., 2015 <sup>44</sup>        | P | E  | Post-op – colon surgery                            | 30 (14W)   | TENS (HF) + SoC (medication) = 24                          | Placebo TENS = 26 (stimulation as low as possible) + SoC (medication)                                                                                                                        | PRN<br>>30m/session                                          | Pain intensity (VAS)<br>• Resting (lying)<br>• On movement (walking + deep breathing) | Analgesic consumption (oxycodone)<br>Time of TENS usage during the 24 hours after EDA termination<br>Quality of Recovery 40 (QoR-40)                                                                                                              |
| Bloodworth et al., 2004 <sup>45</sup>    | C | E  | Radiculopathy – chronic                            | 13 (7W)    | TENS (HF, conventional TENS back) = 13                     | Placebo TENS (0mA, back) = 13<br>Placebo TENS (0mA, leg) = 13<br>TENS (HF, leg) = 13<br>TENS (RF, back) = 13<br>TENS (RF, leg) = 13                                                          | Fixed<br>1 x 10 mins<br>1 session                            | Pain intensity (VAS)                                                                  | McGill Pain Questionnaire<br>Walking speed (feet per second)                                                                                                                                                                                      |
| Bolat et al., 2019 <sup>46</sup>         | P | Pr | Procedural pain - transrectal prostatic biopsy     | 138 (0W)   | TENS (HF) + antibiotic = 73                                | SoC - intrarectal administration of 60 mg lidocaine gel, an additional infiltration of 5 mL of prilocaine and bupivacaine mixture (5 mL of 2% prilocaine and 5 mL of 0.25% bupivacaine) = 65 | Fixed<br>During procedure                                    | Pain intensity (NRS)<br>• probe insertion<br>• biopsy<br>• post-biopsy                | Biopsy times                                                                                                                                                                                                                                      |
| Bono et al., 2015 <sup>47</sup>          | P | Pr | Migraine / tension-type headache - Chronic         | 160 (127W) | TENS (HF, occipital) + acute medications = 108             | Placebo TENS + acute medications = 52 (0mA)                                                                                                                                                  | Fixed<br>3 x 30 mins / day x 14 days                         | Pain intensity (VAS)                                                                  | Analgesic consumption<br>Headache-free days per month                                                                                                                                                                                             |

08\_OL-TABLE1\_IncludedStudies

|                                            |   |    |                                                                      |            |                                                                   |                                                                                                   |                                                       |                                                                           |                                                                                                                                                                                       |
|--------------------------------------------|---|----|----------------------------------------------------------------------|------------|-------------------------------------------------------------------|---------------------------------------------------------------------------------------------------|-------------------------------------------------------|---------------------------------------------------------------------------|---------------------------------------------------------------------------------------------------------------------------------------------------------------------------------------|
|                                            |   |    |                                                                      |            |                                                                   |                                                                                                   | 14 sessions                                           |                                                                           | Allodynia symptom check list (12-item)<br>Migraine Disability Assessment Questionnaire<br>Beck Depression Inventory-II<br>Hamilton Anxiety Rating Scale                               |
| Borjesson et al., 1997 <sup>48</sup>       | P | E  | Angina – unstable                                                    | 30 (11W)   | TENS (HF) + mediation (angina/analgesia) = 14                     | Placebo TENS (low level stimulation <10mA on hips) + mediation (angina/analgesia) = 16            | Fixed<br>4 x 30 mins / day plus PRN for attacks       | Pain intensity (VAS)<br>• Rest                                            | Analgesic consumption<br>Ischemic episodes, ECG and biochemical outcomes<br>Treatment feasibility including AEs                                                                       |
| Borjesson et al., 1998 <sup>49</sup>       | C | E  | Procedural Pain - oesophageal manometry pain                         | 18 (10W)   | TENS (HF) = 18 (at pain - neck)                                   | Placebo TENS = 18 (active, >SDT, remote to pain - hips)                                           | Fixed<br>Before and during procedure                  | Pain intensity (11-point Borg scale)<br>• Oesophageal distension          | Hemodynamic<br>BP, heart rate, ECG<br>Manometric variables<br>Oesophageal pH                                                                                                          |
| Borup et al., 2009 <sup>50</sup>           | P | E  | Labour pain                                                          | 607 (607W) | TENS (HF) + analgesics as needed = 144                            | Traditional analgesics (Control) (SoC, no TENS) = 149<br>Acupuncture + analgesics as needed = 314 | PRN<br>20-45 mins / sessions                          | Pain intensity (VAS)                                                      | Analgesic consumption Non-drug requirements<br>Duration of labour<br>Use of oxytocin Mode of delivery<br>Postpartum<br>Haemorrhage<br>Apgar score<br>Umbilical cord<br>blood pH value |
| Breit and Van der Wall, 2004 <sup>51</sup> | P | E  | Post-op - total knee arthroplasty                                    | 67 (37W)   | TENS (NR) + morphine PCA = 25                                     | Placebo TENS (0mA) + morphine PCA = 22<br>Morphine PCA (SoC, no TENS) = 22                        | PRN<br>1 x 24h post op                                | Pain intensity (VAS)                                                      | Analgesic consumption<br>• Cumulative dose morphine by PCA                                                                                                                            |
| Buchmuller et al., 2012 <sup>52</sup>      | P | Pr | Back pain – chronic low non-specific with and without radicular pain | 236 (148W) | TENS (HF+LF burst) + daily analgesic medication as required = 117 | Placebo TENS (0mA) + daily analgesic medication as required = 119                                 | Fixed<br>4 x 60 mins / day x 3 months<br>~?? sessions | Pain intensity (VAS)<br>• Weekly                                          | Analgesic consumption (anti-inflammatory)<br>Roland Morris Disability Questionnaire<br>Dallas questionnaire<br>SF-36<br>Compliance with TENS treatment<br>Quality of life             |
| Bulut et al., 2011 <sup>53</sup>           | P | Pr | Neuropathic pain – chronic peripheral                                | 40 (23W)   | TENS (HF) = 20                                                    | Placebo TENS = 20 (0mA)                                                                           | Fixed<br>1 x 30 mins / day x 20 days<br>20 sessions   | Pain intensity (VAS)                                                      | Pain grade (6 categories)                                                                                                                                                             |
| Bundsen et al., 1982 <sup>54</sup>         | P | Pr | Labour pain                                                          | 24 (24W)   | TENS (HF + LF burst) = 15                                         | Conventional analgesia, control) (SoC, no TENS) = 9                                               | PRN<br>>1 x 15-30 mins<br>During Labour               | Pain intensity (5-point categorical scale)<br>• low-back / abdominal pain | Pain experience questionnaire<br>Uterine activity<br>Foetal and neonatal condition                                                                                                    |
| Can et al., 2003 <sup>55</sup>             | P | E  | Knee – chronic, patellofemoral pain                                  | 30 (22W)   | TENS (HF) = 16 (23 knees)                                         | Diadynamic current = 14 (19 knees)                                                                | Fixed                                                 | Pain intensity (VAS)                                                      | Lysholm knee scoring scale and squat                                                                                                                                                  |



08\_OL-TABLE1\_IncludedStudies

|                                                     |   |    |                                                   |            |                                                                   |                                                                                                                                                                                                     |                                                                   |                                                |                                                                                                                         |
|-----------------------------------------------------|---|----|---------------------------------------------------|------------|-------------------------------------------------------------------|-----------------------------------------------------------------------------------------------------------------------------------------------------------------------------------------------------|-------------------------------------------------------------------|------------------------------------------------|-------------------------------------------------------------------------------------------------------------------------|
|                                                     |   |    |                                                   |            |                                                                   |                                                                                                                                                                                                     | 1 x 30 mins x 4 to 5 / week x 6 weeks<br><30 sessions             |                                                | Number of squats performed in 30 seconds<br>4-level activity test                                                       |
| Casale et al., 2013 <sup>56</sup>                   | P | Pr | Carpal tunnel syndrome                            | 20 (10W)   | TENS (HF) = 10                                                    | Low level laser therapy = 10                                                                                                                                                                        | Fixed<br>1 x 30 mins / day x 3 weeks<br>15 sessions               | Pain intensity (VAS)                           | Severity paraesthesia<br>Median nerve distal motor latency and sensory nerve conduction velocity                        |
| Çebi, 2019 <sup>57</sup>                            | P | Pr | Post op - pain after impacted third molar surgery | 30 (15W)   | TENS (HF) = ?15                                                   | Routine care (SoC, Pharmacological - Flurbiprofen 100 mg, amoxicillin, chlorhexidine gluconate) = ? 15                                                                                              | Fixed<br>1 x 15 mins / day x 5 days                               | Pain intensity (VAS)                           | None                                                                                                                    |
| Celik et al., 2013 <sup>58</sup>                    | P | Pr | Spinal cord injury, neuropathic pain              | 33 (9W)    | TENS (LF) = 17                                                    | Placebo TENS = 16 (0mA) = 16                                                                                                                                                                        | Fixed<br>1x 30m /day x 10 days<br>10 sessions                     | Pain intensity (VAS)                           | None                                                                                                                    |
| Cetin et al., 2008 <sup>59</sup>                    | P | Pr | Osteoarthritis - knee                             | 100 (100W) | TENS (HF) + hot packs + isokinetic exercise = 20 (Group 2)        | Hot packs + isokinetic exercise) (SoC, no TENS) = 20<br>Shortwave diathermy + hot packs + isokinetic exercise = 20<br>Ultrasound + hot packs + isokinetic exercise = 20<br>Isokinetic exercise = 20 | Fixed<br>1 x 20 mins x 3 / week x 8 weeks<br>24 sessions          | Pain intensity (VAS)<br>• After walk           | Ambulation Activity - time (secs) to walk 50 m<br>Lequesne index<br>Peak torque levels (N·m) knee flexion and extension |
| Chandra et al., 2010 <sup>60</sup>                  | P | E  | Post-op – thoracotomy                             | 60 (29W)   | TENS (HF) + epidural 10 ml of 0.125% bupivacaine at 2-hourly = 30 | Placebo TENS (0mA) + epidural 10 ml of 0.125% bupivacaine at 2-hourly = 30                                                                                                                          | Fixed<br>1 x 45 mins                                              | Pain intensity (VAS)                           | Systolic blood pressure<br>Side effects.                                                                                |
| Cheing and Hui-Chan, 1999 <sup>61</sup>             | P | E  | Back pain - chronic low non-specific              | 30 (9W)    | TENS (HF) = 15                                                    | Placebo TENS = 15 (0mA)                                                                                                                                                                             | Fixed<br>1 x 60 mins                                              | Pain intensity (VAS)                           | Pain intensity (VAS) to electrically-evoked pain                                                                        |
| Cheing and Luk, 2005 <sup>62</sup>                  | P | E  | Neuropathic pain                                  | 19 (3W)    | TENS (HF) = 10                                                    | Placebo TENS = 9 (0mA)                                                                                                                                                                              | Fixed<br>1x 20m/day x5 days x 2weeks<br>10 sessions               | Pain intensity (VAS)                           | Downey Hand Centre Hand Sensitivity Test<br>Flexion reflex                                                              |
| Cheing et al., 2002 <sup>63</sup>                   | P | E  | Osteoarthritis - knee                             | 62 (52W)   | TENS (HF) = 16                                                    | Placebo TENS = 16 (0mA)<br>Exercise (SoC, no TENS control) = 15<br>TENS + Exercise = 15                                                                                                             | Fixed<br>1 x 60 mins/day x 5 days / week x 4 weeks<br>20 sessions | Pain intensity (VAS)                           | None                                                                                                                    |
| Cheing et al., 2003 <sup>64</sup>                   | P | E  | Osteoarthritis - knee                             | 38 (34W)   | TENS (HF) = 10 (60 mins)                                          | Placebo TENS = 8 (0mA)<br>TENS = 10 (20 mins)<br>TENS = 10 (40 mins)                                                                                                                                | Fixed<br>1 x 60 mins/day x 5 days / week x 2 weeks<br>10 sessions | Pain intensity (VAS)<br>• On movement          | Time of 'half-life' for analgesic effect                                                                                |
| Chellappa and Thirupathy, 2020 <sup>65</sup>        | P | Pr | Temporomandibular joint disorder                  | 60 (NR)    | TENS (HF) = 30                                                    | LLLT = 30                                                                                                                                                                                           | Fixed<br>1 x 15 min/day x 2 / week x 3 weeks                      | Pain intensity (VAS, may be categorical scale) | Range of motion<br>Palpation                                                                                            |
| Cherian et al., 2016 <sup>66</sup> – Primary Report | P | Pr | Osteoarthritis - knee                             | 70 (46)    | TENS (AF) = 33                                                    | Standard of care = corticosteroid injections + exercises + pharmaceutical management) (SoC, no TENS) = 10                                                                                           | PRN<br>mean = 27 hours / week x 3 months                          | Pain intensity (VAS)                           | Analgesic consumption<br>Knee Society Scale (KSS)<br>Lower extremity functional scale (LEFS)                            |

08\_OL-TABLE1\_IncludedStudies

|                                                   |                                                                                                    |   |    |                                                              |                                              |                                                      |                                                                                                |                                                                |                                                                       |                                                                                                                                                                                                                                                                                                                    |
|---------------------------------------------------|----------------------------------------------------------------------------------------------------|---|----|--------------------------------------------------------------|----------------------------------------------|------------------------------------------------------|------------------------------------------------------------------------------------------------|----------------------------------------------------------------|-----------------------------------------------------------------------|--------------------------------------------------------------------------------------------------------------------------------------------------------------------------------------------------------------------------------------------------------------------------------------------------------------------|
| 1<br>2<br>3<br>4<br>5<br>6<br>7<br>8              | Secondary Reports<br>Cherian et al., 2015 <sup>67</sup><br>Cherian et al., 2016 <sup>68</sup>      |   |    |                                                              |                                              |                                                      |                                                                                                |                                                                |                                                                       | SF-36<br>Timed up and-go (TUG)<br>5-repetition chair rise<br>Timed stair climb test<br>6-inch step test<br>2-minute walk test<br>Isokinetic strength<br>Active and passive range of motion.                                                                                                                        |
| 9<br>10<br>11<br>12<br>13<br>14<br>15<br>16<br>17 | Chesterton et al., 2013 <sup>69</sup><br><br>Secondary Report<br>Lewis, et al., 2015 <sup>70</sup> | P | Pr | Tendinitis - Lateral epicondylitis - Tennis elbow            | 241 (109W)                                   | TENS (HF) + Primary care management = 121            | Primary care management (exercises + education) (SoC, no TENS) = 120                           | PRN > 1 x 45 mins / day whenever symptoms x 6 weeks            | Pain intensity (NRS)                                                  | Global change in elbow pain (5-point adjectival scale)<br>Pain and limitation in function (patient-rated tennis elbow evaluation)<br>Number of days of sick leave due to tennis elbow<br>EuroQoL EQ-5D (Quality of life)<br>SF-12<br>Changes in health beliefs and perceptions<br>Adherence to treatment protocols |
| 18<br>19<br>20<br>21<br>22<br>23                  | Chia et al., 1990 <sup>71</sup>                                                                    | P | Pr | Labour pain                                                  | Sample 1: 101 (101W)<br>Sample 2: 20 (20W) - | Sample 1: TENS (AF) = 48<br>Sample 2: TENS (AF) = 10 | Sample 1: Inhalation analgesia = 53 (ENTONOX)<br>Sample 2: Inhalation analgesia = 10 (ENTONOX) | PRN<br>During labour                                           | Pain intensity (categorical scale)<br>Pain relief (categorical scale) | Analgesic consumption<br>• Request<br>Treatment failure - request to change type of treatment<br>Duration of use of treatment<br>Cervical dilatation and number of contractions / 10 mins                                                                                                                          |
| 24<br>25<br>26<br>27                              | Chiou et al., 2019 <sup>72</sup>                                                                   | P | Pr | Myofascial pain in neck and shoulder from spinal cord injury | 64 (12W)                                     | TENS (LF/HF, on trigger points) = 30                 | TENS (HF, on remote acupuncture Points) = 30                                                   | Fixed<br>1 x 20 mins / day x 7 days x 1 week                   | Pain intensity (VAS)                                                  | Short-form McGill Pain Questionnaire<br>Hospital Anxiety and Depression Scale<br>Pittsburgh Sleep Quality Index                                                                                                                                                                                                    |
| 28<br>29<br>30                                    | Chitsaz et al., 2009 <sup>73</sup>                                                                 | P | Pr | Spasticity – multiple sclerosis                              | 59 (44W)                                     | TENS (HF) = 29                                       | Nortriptyline = 30                                                                             | PRN<br>>20-30 mins x 3/day x 8 weeks                           | Pain intensity (VAS)<br>• Average                                     | Intensity of sensory complaints (VAS)                                                                                                                                                                                                                                                                              |
| 31<br>32<br>33<br>34                              | Chiu et al., 2005 <sup>74</sup>                                                                    | P | Pr | Neck pain - chronic non-specific                             | 218 (149W)                                   | TENS (HF) + infrared radiation = 78                  | Exercise + Infrared radiation = 67<br>Infrared radiation alone (warmth) = 78                   | Fixed<br>1 x 30 mins / day x 2 / week x 6 weeks<br>12 sessions | Pain intensity (NRS, verbal)                                          | Analgesic consumption<br>Northwick Park Neck Pain questionnaire<br>Percentage subjects on sick leave<br>Peak isometric strength neck muscles.                                                                                                                                                                      |
| 35<br>36<br>37<br>38                              | Cipriano et al., 2008 <sup>75</sup>                                                                | P | Pr | Post-op – cardiac surgery                                    | 45 (13W)                                     | TENS (HF) = 23                                       | Placebo TENS = 22 (active, >SDT-infrequent pulses)                                             | Fixed<br>1 x 240mins (4h) on the third postoperative           | Pain intensity (VAS)<br>• Cough                                       | Spirometry<br>• vital capacity<br>• tidal volume<br>• respiratory rate<br>Electrical muscle activity (EMG)                                                                                                                                                                                                         |
| 39<br>40<br>41<br>42                              | Cipriano et al., 2014 <sup>76</sup>                                                                | P | E  | Post-op cardiac surgery                                      | 38 (18W)                                     | TENS (HF) + pethidine HCl, 20 mg = 20                | Placebo TENS (active, >SDT-infrequent pulses) + pethidine HCl, 20 mg = 18 (active)             | Fixed<br>4 x 30mins/day x 5 days<br>5 sessions                 | Pain intensity (VAS)                                                  | Analgesic consumption (Opioid)<br>Physiological measurements<br>Mean arterial pressure                                                                                                                                                                                                                             |

08\_OL-TABLE1\_IncludedStudies

|                                             |   |    |                                            |            |                                                                                         |                                                                                                                   |                                                                |                                                              |                                                                                                                                                                                                              |
|---------------------------------------------|---|----|--------------------------------------------|------------|-----------------------------------------------------------------------------------------|-------------------------------------------------------------------------------------------------------------------|----------------------------------------------------------------|--------------------------------------------------------------|--------------------------------------------------------------------------------------------------------------------------------------------------------------------------------------------------------------|
|                                             |   |    |                                            |            |                                                                                         |                                                                                                                   |                                                                |                                                              | Femoral blood flow<br>Femoral vascular conductance<br>Beta-Endorphin levels<br>Sympathetic stimulation test<br>6-min walking test                                                                            |
| Coelho de Amorim et al., 2014 <sup>77</sup> | P | Pr | Osteoarthritis - knee                      | 24 (20W)   | TENS (HF) = 12                                                                          | Manual therapy = 12                                                                                               | Fixed<br>1 x 20 mins / day x 3 / week x 4 weeks<br>12 sessions | Pain intensity (VAS)                                         | WOMAC<br>Stiffness<br>Function                                                                                                                                                                               |
| Cooperman et al., 1977 <sup>78</sup>        | P | Pr | Post-op – abdomen                          | 50 (36W)   | TENS (HF) + analgesics as rescue (diazepam, 10 mg i.m., meperidol, 75-100 mg i.m.) = 26 | Placebo TENS = 24 (0mA)                                                                                           | PRN x 5 days                                                   | No primary outcomes                                          | Analgesic consumption                                                                                                                                                                                        |
| Coyne et al., 1995 <sup>79</sup>            | P | E  | Procedural pain - intravenous needlesticks | 61 (35W)   | TENS (HF) = 19                                                                          | Placebo TENS = 21 (not described)                                                                                 | Fixed<br>1 x 12-32 mins<br>1 session                           | Pain intensity (VAS)                                         | Pain unpleasantness (VAS)                                                                                                                                                                                    |
| Crompton et al., 1992 <sup>80</sup>         | P | Pr | Procedural pain – cervical laser treatment | 100 (100W) | TENS (HF) = 34                                                                          | Local anaesthetic (SoC, no TENS) = 35<br>TENS + local anaesthetic (lignocaine) = 29                               | Fixed<br>1 x <20 mins (duration of procedure)                  | Pain intensity (VAS)                                         | Satisfaction and utility of TENS                                                                                                                                                                             |
| Cuschieri et al., 1985 <sup>81</sup>        | P | Pr | Post-op – abdomen                          | 106 (62W)  | TENS (HF) + morphine = 53                                                               | Placebo TENS + morphine = 53 (0mA)                                                                                | PRN<br>72 hours                                                | Pain intensity (VAS)                                         | Analgesic consumption (Morphine)<br>Arterial blood gas analysis<br>Pulmonary complications                                                                                                                   |
| Cuschieri et al., 1987 <sup>82</sup>        | P | Pr | Ischaemic pain - critical leg at rest      | 20 (10W)   | TENS (NR) + morphine = 10                                                               | Placebo TENS + morphine = 10 (0mA)                                                                                | PRN<br>48 hours                                                | Pain intensity (VAS)                                         | Analgesic consumption (Morphine)                                                                                                                                                                             |
| da Silva et al., 2008 <sup>83</sup>         | P | Pr | Fibromyalgia                               | 10 (9W)    | TENS (HF) = 5                                                                           | Hydrotherapy = 5                                                                                                  | Fixed<br>1 x 40 mins/day x3/week x 3 weeks<br>9 sessions       | Pain intensity (VAS)                                         | SF-36<br>Nottingham Health Profile<br>Beck Depression Index<br>Finger-to-floor test (flexibility test)                                                                                                       |
| da Silva et al., 2015 <sup>84</sup>         | P | Pr | Post-op – liposuction                      | 42 (42W)   | TENS (HF) + analgesics (morphine + dipyrone) = 21                                       | Placebo TENS + analgesics (morphine + dipyrone) = 21 (0mA)                                                        | Fixed<br>1 x 30 mins (2h after procedure<br>1 session)         | Pain intensity (VAS)                                         | Analgesic consumption<br>Number and types of adverse effects<br>McGill Pain Questionnaire<br>Patient satisfaction                                                                                            |
| Dailey et al., 2013 <sup>85</sup>           | C | E  | Fibromyalgia                               | 43 (40W)   | TENS (HF) + other treatments (stable) = 43                                              | Placebo TENS = 43 (fading) + other treatments (stable)<br>No TENS + other treatments (stable) (SoC, no TENS) = 43 | Fixed<br>1 x 60-75 mins<br>1 session                           | Pain intensity (VAS)<br>• Resting pain<br>• Pain on movement | Pressure pain threshold at tender points (algometry)<br>Conditioned pain modulation<br>Fatigue at rest and movement (VAS)<br>6 Minute Walk Test<br>Range of Motion<br>Sit to Stand Test<br>Single Leg Stance |
| Dailey et al., 2020 <sup>86</sup>           | P | Pr | Fibromyalgia                               | 301 (301W) | TENS (MF) + routine care (pharmacology) = 103                                           | Placebo TENS (F) = 99                                                                                             | PRN                                                            | Pain intensity (NRS)                                         | Brief Pain Inventory                                                                                                                                                                                         |

08\_OL-TABLE1\_IncludedStudies

|                                       |   |    |                                                    |            |                                                                                            |                                                                                                     |                                                       |                                                                                                                  |                                                                                                                                                                                                                                                                       |
|---------------------------------------|---|----|----------------------------------------------------|------------|--------------------------------------------------------------------------------------------|-----------------------------------------------------------------------------------------------------|-------------------------------------------------------|------------------------------------------------------------------------------------------------------------------|-----------------------------------------------------------------------------------------------------------------------------------------------------------------------------------------------------------------------------------------------------------------------|
|                                       |   |    |                                                    |            |                                                                                            | No TENS (SoC, pharmacology) = 99                                                                    | At home during activity > 1 x 2 hours / day x 4 weeks | <ul style="list-style-type: none"> <li>Resting pain</li> <li>Pain on movement (during 6min walk test)</li> </ul> | Fatigue to 6MWT (NRS) and Multidimensional Assessment of Fatigue<br>Function - International Physical Activity Questionnaire (IPAQ) short form<br>Disease impact<br>Quality of life<br>Global impression of change<br>Fear of Movement<br>Other psychological factors |
| Davies, 1982 <sup>87</sup>            | P | Pr | Post-op – caesarean                                | 35 (35W)   | TENS (HF) + analgesics (papaveretum i.m., paracetamol, Dextropropoxphene as required) = 21 | Placebo TENS (0mA) + analgesics (papaveretum i.m., paracetamol, Dextropropoxphene as required) = 14 | PRN 24 hours                                          | Pain intensity (VAS)                                                                                             | Analgesic consumption (opioid)                                                                                                                                                                                                                                        |
| Dawood and Ramos, 1990 <sup>88</sup>  | C | E  | Dysmenorrhea - primary                             | 32 (32W)   | TENS (HF) + ibuprofen if needed = 32                                                       | Placebo TENS + ibuprofen if needed = 32 (0mA)<br>Ibuprofen (SoC, no TENS) = 32                      | PRN continuously for first 8 hours then PRN           | Pain intensity (5 item categorical scale)                                                                        | Analgesic consumption (Ibuprofen)<br>Pain relief (5 item category scale)<br>Menstrual symptoms including pain intensity (5 categories)                                                                                                                                |
| De Angelis et al., 2003 <sup>89</sup> | P | Pr | Procedural pain – hysterectomy                     | 142 (142W) | TENS (HF) = 71                                                                             | No treatment = 71                                                                                   | Fixed Duration of procedure                           | Pain intensity (VAS) during procedure                                                                            | Pain relief<br>Duration of hysteroscopy<br>CO <sub>2</sub> flow<br>Heart rate                                                                                                                                                                                         |
| De Giorgi et al., 2017 <sup>90</sup>  | P | Pr | Myalgia - Chronic facial (temporomandibular joint) | 49 (49W)   | TENS (HF) = 34                                                                             | No treatment (waiting list control) = 15                                                            | Fixed 1 x 60 mins /day x 10 weeks 10 sessions         | Pain intensity (VAS)                                                                                             | Pericranial Muscle Tenderness Score<br>Cervical Muscle Tenderness Score                                                                                                                                                                                               |
| de Oliveira, 2012 <sup>91</sup>       | P | E  | Dysmenorrhea - primary                             | 15 (15W)   | TENS (HF) = 5                                                                              | Placebo TENS = 5 (0mA)<br>TENS (LF) = 5                                                             | Fixed 1 x 30 mins 1 session                           | Pain intensity (NRS)                                                                                             | Pain interference with daily activities (NRS)                                                                                                                                                                                                                         |
| de Orange et al., 2003 <sup>92</sup>  | P | Pr | Labour pain                                        | 22 (22W)   | TENS (HF) + (Bupivacaine + Sufentanyl epidural) – 11                                       | Analgesic - (Bupivacaine + Sufentanyl epidural (SoC, no TENS) = 11                                  | PRN                                                   | Pain intensity (VAS)                                                                                             | Duration of labour<br>Frequency of hypoxia<br>Apgar score                                                                                                                                                                                                             |
| de Sousa et al., 2014 <sup>93</sup>   | P | E  | Post-partum uterine contraction pain               | 32 (32W)   | TENS (HF) = 16                                                                             | No treatment = 16                                                                                   | Fixed 40 mins during breast feeding 1 session         | Pain intensity (NRS)                                                                                             | Treatment satisfaction                                                                                                                                                                                                                                                |
| DeSantana et al., 2008 <sup>94</sup>  | P | Pr | Post-op – inguinal herniorrhaphy                   | 40 (0W)    | TENS (HF) + Metamizole (Dipyron) = 20                                                      | Placebo TENS (0mA) + Metamizole (Dipyron) = 20                                                      | Fixed 12 x 30 mins at 2h then 4h Post-op              | Pain intensity (NRS)<br>Resting pain                                                                             | Analgesic consumption (Metamizole)<br>Nausea medication consumption<br>TENS-Related Questions                                                                                                                                                                         |
| DeSantana et al., 2009 <sup>95</sup>  | P | E  | Post-op – laparoscopic tubal ligation              | 64 (64W)   | TENS (HF) + medication (Ketoprophen, Hioscin plus Dipyron and Metochlopramide) = 23        | Placebo TENS + medication (Ketoprophen, Hioscin plus Dipyron and Metochlopramide) = 21 (0mA)        | Fixed 1 x 20min 1 sessions                            | Pain intensity (NRS)                                                                                             | McGill Pain Questionnaire                                                                                                                                                                                                                                             |

08\_OL-TABLE1\_IncludedStudies

|                                          |   |    |                                                                                 |           |                                                 |                                                                                             |                                                                                        |                                                    |                                                                                                                                                                                                                                                                                      |
|------------------------------------------|---|----|---------------------------------------------------------------------------------|-----------|-------------------------------------------------|---------------------------------------------------------------------------------------------|----------------------------------------------------------------------------------------|----------------------------------------------------|--------------------------------------------------------------------------------------------------------------------------------------------------------------------------------------------------------------------------------------------------------------------------------------|
|                                          |   |    |                                                                                 |           |                                                 | TENS (LF) + medication (Ketoprophen, Hioscin plus Dipyronne and Metochlopramide) = 20       |                                                                                        |                                                    |                                                                                                                                                                                                                                                                                      |
| Dewan and Sharma, 2011 <sup>96</sup>     | P | Pr | Adhesive capsulitis                                                             | 50 (NR)   | TENS (HF) = 25                                  | IFT= 25                                                                                     | Fixed<br>1 x 20 mins x 2 to 3 / week x 4 weeks<br>10 sessions                          | Pain intensity (VAS)                               | Range of motion<br>Constant Murley Assessment (CMA) score                                                                                                                                                                                                                            |
| Deyo et al. (1990) <sup>97</sup>         | P | Pr | Back pain – chronic, low, non-specific                                          | 125 (73)  | TENS (AF, HF, LF burst) = 31                    | Placebo TENS = 29 (0mA)<br><br>Placebo TENS + exercises = 29 (0mA)<br>TENS + exercises = 34 | Fixed<br>1 x 45 min x 3/day<br>3 sessions                                              | Pain intensity (VAS)                               | Pain improvement (6-point scale)<br>Pain improvement (VAS)<br>Pain frequency (5-point scale)<br>Sickness Impact profile<br>Level of activity (self-assessed 3 categories)<br>Straight leg raising test<br>Schober test<br>Use of medical providers                                   |
| Dibenedetto et al., 1993 <sup>98</sup>   | P | Pr | Fibromyalgia                                                                    | 30 (29W)  | TENS (HF) = 15                                  | S = Adenosyl-L methionine = 15                                                              | Fixed<br>1 x 20 mins / day at each of 4 MTPs<br>5 days / week x 6 weeks<br>30 sessions | Pain intensity (VAS)                               | Total tender point score<br>• Number<br>• Tenderness intensity (5-point scale)<br>Pressure pain threshold (algometry)<br>Hamilton Rating Scale for Depression<br>Fatigue, sleep, and well-being (VAS)<br>Laboratory tests (complete blood picture)<br>Overall evaluation of efficacy |
| Dilekci et al., 2016 <sup>99</sup>       | P | Pr | Tendinitis - Lateral epicondylitis                                              | 65 (43W)  | TENS (HF) + SoC including NSAIDs =30            | Standard of care (SoC, no TENS) = 30                                                        | Fixed<br>1 x 30 mins / day<br>10 sessions                                              | Pain intensity (VAS)<br>• At rest<br>• On movement | Patient-Rated Tennis Elbow Evaluation (PRTEE) questionnaire                                                                                                                                                                                                                          |
| Dissanayaka et al., 2016 <sup>100</sup>  | P | Pr | Myofascial pain – syndrome patients with up/ trapezius myofascial trigger point | 105 (58W) | TENS (HF) + SoC = 35                            | Standard care (SoC, no TENS) = 35<br>IFT+ standard care = 35                                | Fixed<br>1 x 20 mins x 2 / week x 4 weeks<br>8 sessions                                | Pain intensity (VAS)                               | Range of motion – cervical                                                                                                                                                                                                                                                           |
| Dogu et al., 2008 <sup>101</sup>         | P | Pr | Myofascial pain and temporomandibular disorders                                 | 30 (28W)  | TENS (HF) + rescue analgesic (paracetamol) = 14 | Occlusal splint (SoC) = 16                                                                  | Fixed<br>1 x 30 mins / day x 5 days / week x 4 weeks<br>20 sessions.                   | No pain intensity                                  | Pressure-pain threshold (algometry) during rest and functional activities<br>Pain and range of motion<br>Quality of life both general and specific to masticatory functions<br>SF-36                                                                                                 |
| Domaille and Reeves, 1997 <sup>102</sup> | P | E  | Post-op – coronary artery bypass                                                | 60 (0W)   | TENS (HF) + 1 mg morphine PCA = 31              | Placebo TENS+ 1 mg morphine PCA = 29 (0mA)                                                  | Fixed<br>1 x 3h                                                                        | Pain intensity (VAS)                               | Analgesic consumption (Morphine) - PCA                                                                                                                                                                                                                                               |

08\_OL-TABLE1\_IncludedStudies

|                                                                 |   |    |                                                                                 |            |                                                                            |                                                                                                                           |                                                                                  |                                                                    |                                                                                                                     |
|-----------------------------------------------------------------|---|----|---------------------------------------------------------------------------------|------------|----------------------------------------------------------------------------|---------------------------------------------------------------------------------------------------------------------------|----------------------------------------------------------------------------------|--------------------------------------------------------------------|---------------------------------------------------------------------------------------------------------------------|
| Ebadi et al., 2018 <sup>103</sup>                               | P | E  | Back pain – chronic, low, non-specific                                          | 30 (15W)   | TENS (HF) = 15                                                             | Diadynamic = 15                                                                                                           | Fixed<br>1 x 15 mins                                                             | Pain intensity (VAS)                                               | Pressure pain threshold (algometry)<br>Depression Anxiety and Stress Scale (DASS)                                   |
| Ekblom and Hansson, 1987 <sup>104</sup>                         | C | E  | Oral – acute pain from teeth and/ or surrounding tissue                         | 40 (17W)   | TENS (HF) = 11                                                             | Placebo TENS = 5 (0mA)<br>TENS (LF) = 11<br>Vibration = 8<br>Placebo vibration = 5                                        | Fixed<br>1 x 30 mins<br>1 session                                                | Pain intensity (VAS)                                               | Thermal threshold (heat and cold)                                                                                   |
| Ekim et al., 2008 <sup>105</sup>                                | P | Pr | Hemiplegic Shoulder Pain                                                        | 19 (8W)    | TENS (HF) + Hemiplegia rehabilitation = 10                                 | Placebo TENS (0mA) + Hemiplegia rehabilitation = 9                                                                        | Fixed<br>1 x 20 minutes / day x 5 / week x 3 weeks<br>15 sessions                | Pain Intensity (VAS)                                               | Barthel Index<br>Range of motion - upper limb                                                                       |
| Elboim-Gabyzon et al., 2019 <sup>106</sup>                      | P | Pr | Post op - following Gamma-nail surgical fixation of extracapsular hip fractures | 41 (32W)   | TENS (HF) + SoC – physiotherapy = 23                                       | Placebo TENS (0mA) + SoC – physiotherapy = 18                                                                             | Fixed<br>1 x 30 mins / day x 5 days<br>5 sessions                                | Pain Intensity (NRS)<br>• rest<br>• during night during ambulation | Functional Ambulation Classification instrument<br>Time to complete five sit-to-stand tests<br>Two-minute walk test |
| Elserty et al., 2016 <sup>107</sup>                             | P | Pr | Back pain – chronic, low, non-specific                                          | 45 (31W)   | TENS (HF) + exercise = 15 (pulse amplitude adjusted every 5 mins, Group B) | Exercises only (SoC, no TENS, Group C) = 15<br>TENS + exercise = 15 (Fixed pulse amplitude, Group A)                      | Fixed<br>1 x 40 mins x 3 / week x 4 weeks                                        | Pain intensity (VAS)                                               | Oswestry Disability Index (ODI)<br>Lumbar range of motion (flexion and extension)                                   |
| Emmiller et al., 2008 <sup>108</sup>                            | P | Pr | Post-op – open cardiac operation                                                | 60 (18W)   | TENS (HF) + analgesia (pethidine and metamizole) = 20                      | Placebo TENS + analgesia (pethidine and metamizole) = 20 (0mA)<br>Analgesia (pethidine and metamizole (SoC, no TENS) = 20 | Fixed<br>1 x 60 mins then 60 mins rest then 1 x 60 mins                          | Pain intensity (VAS)                                               | Analgesic consumption                                                                                               |
| Engen et al., 2016 <sup>109</sup>                               | P | Pr | Post-op – video assisted thoracoscopic surgery                                  | 40 (23W)   | TENS (VF) + Opioids (morphine - oral) = 20                                 | Opioids (morphine - oral) (SoC, no TENS) = 20                                                                             | PRN for 48 hours after surgery                                                   | Pain intensity (VAS)                                               | Analgesic consumption (opioids + blocks)<br>Rating of physical status<br>TENS satisfaction and utility              |
| Erden and Senol Celik, 2015 <sup>110</sup>                      | P | Pr | Post-op -posterolateral thoracotomy                                             | 40 (10W)   | TENS (HF) + analgesics (tramadol / tamoxicam) = 20                         | No TENS + analgesics (tramadol / tamoxicam) (SoC, no TENS) = 20                                                           | Fixed<br>3 x 30 mins / day x 2 days then 2 x 30 mins / day                       | Pain intensity (VAS)<br>• Resting pain<br>• During cough           | Analgesic consumption (Opioid)                                                                                      |
| Erdogan et al., 2005 <sup>111</sup>                             | P | Pr | Post-op thoracotomy pain                                                        | 116 (46W)  | TENS (HF) + standard medication as needed) = 60                            | Placebo TENS (0mA) + standard medication as needed = 56                                                                   | PRN for 48 hours then 1 x 20 mins at 3-hour intervals for 2 days 5 days in total | Pain intensity (VAS)<br>• Resting pain<br>• During cough           | Analgesic consumption<br>Spirometric breath functions (FEV1 and FVC)<br>Blood gases (PaO2 and PaCO2)                |
| Erkkola et al., 1980 <sup>112</sup>                             | P | Pr | Labour pain                                                                     | 200 (200W) | TENS (NR) + meperidine = 100                                               | No TENS + meperidine (SoC, no TENS) = 100                                                                                 | PRN throughout delivery                                                          | Pain intensity (5-point categorical scale)                         | Pain questionnaire (no description)<br>Desire for analgesics                                                        |
| Escortell-Mayor et al., 2011 <sup>113</sup><br>Secondary Report | P | E  | Neck pain - chronic non-specific ('mechanical neck disorder')                   | 90 (80W)   | TENS (HF) + exercises and education = 43                                   | Manual therapy + exercises and education (SoC, no TENS) = 47                                                              | Fixed<br>1 x 30 mins / day every 2 days total 10 sessions                        | Pain intensity (VAS)                                               | Neck Disability Index<br>SF-12<br>Physical Component Summary (PSC-12)                                               |

08\_OL-TABLE1\_IncludedStudies

|                                              |   |    |                                          |            |                                                                                  |                                                                                                            |                                                                                   |                                                                                      |                                                                                                                                                        |
|----------------------------------------------|---|----|------------------------------------------|------------|----------------------------------------------------------------------------------|------------------------------------------------------------------------------------------------------------|-----------------------------------------------------------------------------------|--------------------------------------------------------------------------------------|--------------------------------------------------------------------------------------------------------------------------------------------------------|
| Escortell Mayor et al., 2008 <sup>114</sup>  |   |    |                                          |            |                                                                                  |                                                                                                            |                                                                                   |                                                                                      | Mental Component Summary (MCS-12)<br>Duration of crisis (days)<br>General Health Questionnaire-28                                                      |
| Esteban Gonzalez et al., 2015 <sup>115</sup> | P | Pr | Post-op - thoracotomy (shoulder pain)    | 50 (10W)   | TENS (HF) + analgesics (epidural - paracetamol and ibuprofen or metamizole) = 25 | Placebo TENS = 25 (0mA) + analgesics (epidural - paracetamol and ibuprofen or metamizole)                  | Fixed<br>1 x 30 mins every 8 hours x 3 days                                       | Pain intensity (VAS)<br>• on movement                                                | Range of motion                                                                                                                                        |
| Eyigor et al., 2008 <sup>116</sup>           | P | Pr | Osteoarthritis - Knee                    | 45(34W)    | TENS (HF) + superficial heat and exercise = 14                                   | Control - superficial heat and exercise (SoC, no TENS) = 15<br><br>US + superficial heat and exercise = 15 | Fixed<br>1 x 20 mins / day x 5 days / week x 3 weeks<br>15 sessions               | Pain intensity (VAS)                                                                 | 20-meter walking test<br>Lequesne index<br>WOMAC<br>Isokinetic muscle testing<br>SF 36                                                                 |
| Eyigor et al., 2010 <sup>117</sup>           | P | Pr | Tendinitis – rotator cuff                | 40 (29W)   | TENS (HF) + exercises (Codman) + Paracetamol = 20                                | Intra articular injection of corticosteroid (+ exercises (Codman) + Paracetamol) = 20                      | Fixed<br>5 x 30 mins / week for 3 weeks<br>15 sessions                            | Pain intensity (VAS)<br>• Resting pain                                               | Analgesic consumption (Paracetamol)<br>Range of motion<br>Shoulder disability questionnaire (SDQ)<br>Beck depression inventory<br>Doctors satisfaction |
| Facci et al., 2011 <sup>118</sup>            | P | Pr | Back pain – Chronic, low, non-specific   | 150 (109W) | TENS (HF) = 50                                                                   | No treatment (waiting list) = 50<br>IFT= 50                                                                | Fixed<br>1 x 30 mins / day x 5 days x 2 weeks<br>10 sessions                      | Pain intensity (VAS)                                                                 | McGill Pain Questionnaire<br>Analgesic consumption<br>Duration of pain relieve post intervention                                                       |
| Farahani et al., 2014 <sup>119</sup>         | P | E  | Headache – primary                       | 45 (20W)   | TENS (NR) = 15                                                                   | No treatment = 15<br>Neurofeedback behavioural therapy = 15                                                | Fixed<br>1 x 20 mins / day x 20 days<br><br>20 sessions                           | Pain intensity (? VAS – 100mm)                                                       | Frequency of pain<br>Duration of headache<br>Blanchard headache diary                                                                                  |
| Farina et al., 2004 <sup>120</sup>           | P | Pr | Upper trapezius Myofascial pain syndrome | 40 (30W)   | TENS (HF) = 21                                                                   | Frequency modulated neural stimulation = 19                                                                | Fixed<br>1 x 20 mins / day x 5 days / week x 2 weeks<br>10 sessions               | No pain intensity                                                                    | Disability (NPDVAS)<br>Myofascial trigger point characteristics Pressure pain threshold (algometry).<br>Range of motion                                |
| Fatima and Sarfraz, 2019 <sup>121</sup>      | P | Pr | Post op - Caesarean                      | 50 (50W)   | TENS (HF) + exercises + analgesics as needed = 25                                | TENS (LF, 4Hz) + exercises + analgesics as needed = 25                                                     | Fixed<br>2 x 20 mins / day x 3 days<br>6 sessions                                 | Pain intensity (NRS)                                                                 | Analgesic consumption                                                                                                                                  |
| Ferraz and Moreira, 2009 <sup>122</sup>      | P | E  | Post-op - cardiac surgery                | 20 (6W)    | TENS (HF) = 10                                                                   | Placebo TENS = 10 (0mA)                                                                                    | Fixed<br>1 x 20 mins<br>1 session                                                 | Pain intensity (NRS)                                                                 | Analgesic consumption                                                                                                                                  |
| Ferreira et al., 2011 <sup>123</sup>         | P | E  | Post-op - thoracotomy                    | 30 (12W)   | TENS (HF) + fentanyl / bupivacaine = 15                                          | Placebo TENS (0mA) + fentanyl / bupivacaine = 15                                                           | Fixed<br>1 x 60 mins<br>1 h after epidural on second Post-op day<br><br>1 session | Pain intensity (VAS)<br>• Resting pain<br>• Changing decubitus<br>• Pain on movement | None                                                                                                                                                   |



08\_OL-TABLE1\_IncludedStudies

|                                         |   |    |                                                |          |                                                    |                                                                                                                                              |                                                                                                    |                                                          |                                                                                                                                                                                                                                                                                                                             |
|-----------------------------------------|---|----|------------------------------------------------|----------|----------------------------------------------------|----------------------------------------------------------------------------------------------------------------------------------------------|----------------------------------------------------------------------------------------------------|----------------------------------------------------------|-----------------------------------------------------------------------------------------------------------------------------------------------------------------------------------------------------------------------------------------------------------------------------------------------------------------------------|
|                                         |   |    |                                                |          |                                                    |                                                                                                                                              |                                                                                                    | • During cough                                           |                                                                                                                                                                                                                                                                                                                             |
| Ferreira et al., 2017 <sup>124</sup>    | P | E  | Temporomandibular disorder – chronic           | 40 (30W) | TENS (LF then HF) = 20                             | Placebo TENS = 20 (current fade away to 0mA after 40s)                                                                                       | Fixed 1 x 50 mins 1 session                                                                        | Pain intensity (VAS)                                     | Pressure pain threshold (algometry)<br>EMG activity                                                                                                                                                                                                                                                                         |
| Finsen et al., 1988 <sup>125</sup>      | P | Pr | Post-op - major amputation                     | 51 (24W) | TENS (LF) + analgesics (NR) = 17                   | Placebo TENS + analgesics (NR) = 19 (0mA)<br>Chlorpromazine + placebo TENS (0mA) + analgesics (NR) = 15                                      | Fixed 2 x 30 mins / day x 2 weeks<br>28 sessions                                                   | No primary outcome                                       | Analgesic consumption<br>Presence of phantom pain (tally of yes or no answers)                                                                                                                                                                                                                                              |
| Fiorelli et al., 2012 <sup>126</sup>    | P | Pr | Post-op - thoracotomy                          | 50 (19W) | TENS (HF) + morphine PCA = 25                      | Placebo TENS + morphine PCA = 25 (0mA)                                                                                                       | Fixed 1 x 30 mins at 4h intervals for first 48h then 2 x 30 mins / day from day 3-5<br>16 sessions | Pain intensity (VAS)                                     | Analgesic consumption (morphine-PCA)<br>Serum cytokines measurements<br>Respiratory function (FVC, FEV 1)                                                                                                                                                                                                                   |
| Fodor-Sertl et al., 1990 <sup>127</sup> | P | Pr | Post-op - thoracotomy                          | 40 (7W)  | TENS (HF, segmental) + medication = 16             | Placebo TENS (non-segmental, placebo control) + analgesic medication = 18                                                                    | Fixed 15-30 mins 6 post-operative days                                                             | No primary outcomes                                      | Analgesic consumption                                                                                                                                                                                                                                                                                                       |
| Forogh et al., 2019 <sup>128</sup>      | P | Pr | Rehabilitation – following ACL surgery         | 70 (0W)  | TENS (HF) + exercise = 35                          | Exercise (SoC, no TENS) = 35                                                                                                                 | Fixed 1 x 35 mins / day x 5 days / week x 4 weeks<br>20 sessions                                   | Pain intensity (VAS)                                     | International knee documentation committee (IKDC) questionnaire<br>Range of motion                                                                                                                                                                                                                                          |
| Forst et al., 2004 <sup>129</sup>       | P | Pr | Peripheral diabetic neuropathy                 | 19 (9W)  | TENS (LF) = 12                                     | Placebo TENS = 7 (0mA)                                                                                                                       | PRN >30 mins / day /leg for 12 weeks                                                               | Pain intensity (VAS)                                     | New total symptom score (NTSS = 6)<br>Sensory nerve threshold (temperature, vibration, pain)<br>Neuropathy total symptom score-6 (NTSS - 6)<br>Intensity of dysaesthesia, hypaesthesia and muscle weakness (VAS)<br>Peripheral nerve function – vibration perception and temperature thresholds<br>Microvascular blood flow |
| Forster et al., 1994 <sup>130</sup>     | P | Pr | Post-op - coronary artery bypass graft surgery | 45 (0W)  | TENS (HF) + Analgesics (morphine/paracetamol) = 15 | Placebo TENS Analgesics (morphine/paracetamol) = 15 (0mA)<br>Control Analgesics (morphine/paracetamol), (SoC, no TENS) = 15 (no description) | PRN up to 72 hours post op                                                                         | Pain intensity (NRS)<br>• Resting pain<br>• During cough | Analgesic consumption (Narcotic)                                                                                                                                                                                                                                                                                            |
| Fujii-Abe et al., 2019 <sup>131</sup>   | P | E  | Post-op – Wisdom tooth extraction              | 44 (23W) | HF TENS (non-noxious) = 11                         | Placebo TENS (0mA) = 11<br>TENS (noxious, conditioned pain modulation) = 11<br>Combined TENS (non-noxious + noxious) = 11                    | Fixed 1 x 20 mins                                                                                  | Pain intensity (VAS)                                     | None                                                                                                                                                                                                                                                                                                                        |
| Galli et al., 2015 <sup>132</sup>       | P | E  | Post-op - nephrectomy                          | 74 (39W) | TENS (HF) + analgesics (unknown) = 37              | Placebo TENS (fading) + analgesics (unknown) = 37                                                                                            | Fixed 1 x 60 mins                                                                                  | Pain intensity (NRS)<br>• Resting pain                   | Respiratory muscle strength<br>Pulmonary function<br>Walk function                                                                                                                                                                                                                                                          |

08\_OL-TABLE1\_IncludedStudies

|                                           |   |    |                                               |          |                                                      |                                                                                                                                                                                                            |                                                                                                |                                                                                                                                |                                                                                                                                                             |
|-------------------------------------------|---|----|-----------------------------------------------|----------|------------------------------------------------------|------------------------------------------------------------------------------------------------------------------------------------------------------------------------------------------------------------|------------------------------------------------------------------------------------------------|--------------------------------------------------------------------------------------------------------------------------------|-------------------------------------------------------------------------------------------------------------------------------------------------------------|
|                                           |   |    |                                               |          |                                                      |                                                                                                                                                                                                            |                                                                                                | <ul style="list-style-type: none"> <li>• During cough</li> <li>• During pulmonary testing</li> <li>• During walking</li> </ul> |                                                                                                                                                             |
| Galloway et al., 1984 <sup>133</sup>      | P | Pr | Post-op - abdominal                           | 40 (30W) | TENS (PRN) + analgesic (Cyclimorph) as required = 14 | No treatment (SoC, no TENS) + analgesic (Cyclimorph) as required = 14<br>TENS + analgesic Ccyclimorph) as required = 12<br>(Remote – non = segmental)                                                      | PRN for 48 hours                                                                               | Pain intensity (VAS, Likert scale)                                                                                             | Analgesic consumption<br>Wound pain discomfort (VAS)                                                                                                        |
| Garcia-Perez et al., 2018 <sup>134</sup>  | P | Pr | Pressure ulcers (injury)                      | 17 (15W) | TENS (HF) + standard wound care = 9                  | Standard wound care (SoC, no TENS) = 8                                                                                                                                                                     | Fixed 1 x 60 mins / day x 3 weeks total<br>20 sessions                                         | No primary outcome                                                                                                             | Pressure injury area<br>Pressure injury healing rate<br>Blood flow in affected lower limb<br>Skin temperature<br>Pain Assessment in Advanced Dementia Scale |
| Gerson et al., 1977 <sup>135</sup>        | C | E  | Post herpetic neuralgia                       | 29 (NR)  | TENS (NR) = 13                                       | Carbamazepine + Clomipramine = 16                                                                                                                                                                          | Fixed 1 x 15 mins / week x 4 weeks then one x 15 mins put 2 weeks x 6 weeks<br>? x 8 weeks too | Pain intensity (VAS).                                                                                                          | Analgesic consumption<br>Plasma concentrations of drugs<br>Physical activity and mental outlook (VAS)                                                       |
| Ghonomie et al., 1999 <sup>136</sup>      | C | E  | Back pain - low                               | 60 (31W) | TENS (LF) + analgesics (non-opioid) as required = 60 | Placebo PENS (0mA) + analgesics as required = 64<br>PENS + analgesics as required = 64<br>Exercise therapies + analgesics as required = (SoC, no TENS) = 64                                                | Fixed 1 x 30 mins x 3 / week x 3 weeks<br>9 sessions                                           | Pain intensity (VAS)                                                                                                           | Analgesic consumption<br>SF-36<br>Physical component summary<br>Mental component summary<br>Quality of sleep<br>Well-being)                                 |
| Ghonomie et al., 1999 <sup>137</sup>      | C | E  | Back pain - Sciatica                          | 64 (34W) | TENS (LF) + analgesics (non-opioid) as required = 64 | Placebo PENS + analgesics as required (0mA) = 64<br>PENS + analgesics as required = 64                                                                                                                     | Fixed 1 x 30 mins / day x 3 weeks<br>21 sessions                                               | Pain intensity (VAS)                                                                                                           | Analgesic consumption<br>SF-36<br>Physical activity and quality of sleep during the 24 h interval prior to each treatment session (VAS)                     |
| Gilbert et al., 1986 <sup>138</sup>       | P | Pr | Post-op - inguinal herniorrhaphy              | 40 (0W)  | TENS (HF) + Pethidine as required = 20               | Placebo TENS + Pethidine as required = 20 (0mA)                                                                                                                                                            | PRN                                                                                            | Pain intensity (VAS)                                                                                                           | Analgesic consumption (Pethidine)<br>Expiratory peak flow                                                                                                   |
| Grabiańska et al., 2015 <sup>139</sup>    | P | Pr | Back pain low                                 | 60 (NR)  | TENS (HF) = 30                                       | IFT = 30                                                                                                                                                                                                   | Fixed 10 x 20 mins / day                                                                       | Pain intensity (VAS)                                                                                                           | Laitinen Pain Questionnaire                                                                                                                                 |
| Graff-Radford et al., 1989 <sup>140</sup> | P | E  | Myofascial pain and trigger point sensitivity | 60 (45W) | TENS (HF) = 12                                       | Sham Control (Staadynamics unit or Pain Suppressor unit. 0mA). = 12<br>TENS (LF, 2hz, 250us, >MDT) = 12<br>TENS (HF, 50us, SBC) = 12<br>TENS (Pain Suppressor, 4mA, 15Hz burst of 20Khz ,active <SDT) = 12 | Fixed 1 x 30 mins<br>1 session                                                                 | Pain intensity (VAS)                                                                                                           | Pressure algometry                                                                                                                                          |
| Grant et al., 1999 <sup>141</sup>         | P | E  | Back pain                                     | 60 (54W) | TENS (HF) = 28                                       | Acupuncture = 32                                                                                                                                                                                           | PRN                                                                                            | Pain intensity (VAS)                                                                                                           | Analgesic consumption<br>Pain subscale of Nottingham Health Profile                                                                                         |

08\_OL-TABLE1\_IncludedStudies

|                                            |   |    |                                                      |            |                                          |                                                                                                                  |                                                                                         |                                                  |                                                                                                                                                                                                                           |
|--------------------------------------------|---|----|------------------------------------------------------|------------|------------------------------------------|------------------------------------------------------------------------------------------------------------------|-----------------------------------------------------------------------------------------|--------------------------------------------------|---------------------------------------------------------------------------------------------------------------------------------------------------------------------------------------------------------------------------|
|                                            |   |    |                                                      |            |                                          |                                                                                                                  | 1 x <30 mins / session and < 6h / day for 4 weeks                                       |                                                  | Spinal flexion measured from C7 to S1                                                                                                                                                                                     |
| Gregorini et al., 2010 <sup>142</sup>      | P | E  | Post-op - cardiac surgery                            | 25 (7W)    | TENS (HF) = 13                           | Placebo TENS (>SDT – infrequent pulses) = 12                                                                     | Fixed<br>1 x 4 hours ?? on 3rd post-op day                                              | Pain intensity (VAS)                             | Respiratory muscle strength<br>Lung volumes and capacity                                                                                                                                                                  |
| Grimmer, 1992 <sup>143</sup>               | P | E  | Osteoarthritis - knee                                | 60 (37W)   | TENS (HF) = 20                           | Placebo TENS = 20 (0mA)<br>TENS (LF, burst) = 20                                                                 | Fixed<br>1 x 30 mins<br>1 session                                                       | Pain intensity (VAS)                             | Stiffness change (VAS)<br>Pain relief time (in hours)<br>Stiffness relief time (hours)<br>Change on knee circumference<br>Change in knee range of motion<br>Physiological respiratory rate, heart rate and blood pressure |
| Gschiel et al., 2010 <sup>144</sup>        | P | Pr | Osteoarthritis – knee (gonarthrosis)                 | 45 (32W)   | TENS (AF) = 25                           | Placebo TENS (0mA) = 20                                                                                          | PRN<br>>2 x 30 mins / day for 3-weeks                                                   | Pain intensity (VAS)                             | SF-36<br>WOMAC<br>Lysholm score                                                                                                                                                                                           |
| Gunay Ucurum et al., 2018 <sup>145</sup>   | P | Pr | Shoulder impingement syndrome                        | 79 (65W)   | TENS (NR) + exercise = 20                | Exercise (SoC, no TENS) = 19<br>IFT + Exercise = 20<br>US + Exercise = 20                                        | Fixed<br>1 x ?? mins x 3 / week x 4 weeks<br>12 sessions                                | Pain intensity (VAS)                             | Short Form-36 (SF-36)<br>Disabilities of the Arm, Shoulder and Hand questionnaire (DASH)                                                                                                                                  |
| Guo and Jia, 2005 <sup>146</sup>           | P | Pr | Fibromyalgia                                         | 66 (45W)   | TENS (HF) = 22                           | Routine medication (SoC, no TENS) = 22<br>EA = 22                                                                | Fixed<br>1 x 30 mins / day for 20 days [repeated for another 20 days]<br>?? 40 sessions | Pain intensity (VAS)                             | Analgesic consumption                                                                                                                                                                                                     |
| Hamza et al., 1999 <sup>147</sup>          | P | Pr | Post-op - gynaecological                             | 100 (100W) | TENS (HF) + morphine PCA = 25            | Placebo TENS + morphine PCA = 25 (0mA)<br>TENS (LF) + morphine PCA = 25<br>TENS (AF) + morphine PCA = 25         | Fixed<br>1 x 30 mins at intervals of 2 h or longer while patient awake                  | Pain intensity (VAS)                             | Analgesic consumption (PCA morphine)<br>levels of sedation, fatigue, discomfort and nausea                                                                                                                                |
| Hanfy and El-Bigawy, 2004 <sup>148</sup>   | P | Pr | Dysmenorrhea – primary                               | 30 (30W)   | TENS (HF) = 15                           | Acupressure = 15                                                                                                 | Fixed<br>1 x 20 mins x 3 days x 3 menstrual cycles                                      | Pain intensity (6-point scale)                   | Pain relief (5-point scale)                                                                                                                                                                                               |
| Hansson and Ekblom, 1983 <sup>149</sup>    | C | E  | Orofacial pain – acute                               | 62 (36W)   | TENS (HF) = 22                           | Placebo TENS (0mA) = 20<br>TENS (LF, burst) = 20                                                                 | Fixed<br>1 x 30 mins<br>1 session                                                       | Pain intensity (5-point verbal scale)            | None                                                                                                                                                                                                                      |
| Hansson et al., 1986 <sup>150</sup>        | P | E  | Post-op - oral                                       | 28 (16W)   | TENS (HF) + naloxone = 6                 | TENS (LF, burst) + naloxone = 7<br>Vibration + Naloxone = 7<br>Naloxone = 8                                      | Fixed<br>1 x 45 mins<br>1 session                                                       | Pain intensity (5-point verbal scale)            | None                                                                                                                                                                                                                      |
| Hargreaves and Lander, 1989 <sup>151</sup> | P | E  | Post-op dressing changes following abdominal surgery | 75 (34W)   | TENS (HF) + meperidine and morphine = 25 | Placebo TENS (0mA) + meperidine and morphine = 25<br>No treatment (+ meperidine and morphine, SoC, no TENS) = 25 | Fixed<br>1 x 15 to 60 mins depending on duration of dressing change<br>1 session        | Pain intensity (VAS)<br>• During dressing change | Analgesic consumption (prescription and administration)                                                                                                                                                                   |
| Harrison et al., 1986 <sup>152</sup>       | P | Pr | Labour pain                                          | 150 (150W) | TENS (HF+LF burst) = 76                  | Placebo TENS = 73 (0mA)                                                                                          | PRN<br>During labour                                                                    | Pain intensity (5-point scale)                   | Analgesic consumption<br>Hours pf labour<br>Mode of delivery<br>Pain relief reported by the midwife (5-point scale)                                                                                                       |

08\_OL-TABLE1\_IncludedStudies

|                                           |   |    |                                                         |           |                                                               |                                                                                                                                                                                                                                                                                                                                      |                                                              |                                                                  |                                                                                                                                                                                                                                                      |
|-------------------------------------------|---|----|---------------------------------------------------------|-----------|---------------------------------------------------------------|--------------------------------------------------------------------------------------------------------------------------------------------------------------------------------------------------------------------------------------------------------------------------------------------------------------------------------------|--------------------------------------------------------------|------------------------------------------------------------------|------------------------------------------------------------------------------------------------------------------------------------------------------------------------------------------------------------------------------------------------------|
| Hart et al., 2012 <sup>153</sup>          | P | Pr | Rehabilitation - Anterior cruciate ligament             | 30 (10W)  | TENS (HF) + exercise = 10                                     | Exercise alone (SoC, no TENS) = 10<br>Cryotherapy + Exercise = 10                                                                                                                                                                                                                                                                    | PRN<br>Daily x 2 weeks and during in clinic exercise session | Pain intensity (VAS)                                             | Various functional outcomes for knee<br>Tegner activity rating<br>International Knee Documentation Committee subjective knee evaluation form.<br>Circumferential girth (measured at mid-patella)<br>Range of motion<br>Quadriceps central activation |
| Hazneci et al., 2005 <sup>154</sup>       | P | Pr | CRPS - reflex sympathetic dystrophy syndrome upper limb | 30 (0W)   | TENS (HF) +, contrast bathing and exercise programme = 16     | Pulsed US on stellate ganglion + contrast bathing and exercise programme = 14                                                                                                                                                                                                                                                        | Fixed<br>1 x 20 mins / day for 3 weeks<br>21 sessions        | Pain intensity (???)<br>• spontaneous pain<br>• provocative pain | Loss of mobility, muscle power<br>Oedema                                                                                                                                                                                                             |
| Herrera-Lasso et al., 1993 <sup>155</sup> | P | Pr | Shoulder – painful syndrome                             | 29 (23W)  | TENS (HF) + Exercises + Heat (superficial) = 15               | US + Exercises + Heat (superficial) = 14                                                                                                                                                                                                                                                                                             | Fixed<br>1 x 20 mins / day x 2-5 / week<br>13 sessions       | Pain intensity (VAS)                                             | Range of motion                                                                                                                                                                                                                                      |
| Hershman, 1989 <sup>156</sup>             | P | Pr | Post op - colorectal or cholecystectomy                 | 95 (47W)  | TENS (HF) + omnopon (opiate) = 48                             | Placebo TENS + omnopon (opiate) (0mA) = 47                                                                                                                                                                                                                                                                                           | PRN<br>48h post-operative                                    | No primary outcome                                               | Analgesic consumption - Opiate<br>Anti- emetic consumption<br>Duration of hospital stay                                                                                                                                                              |
| Hokenek et al., 2020 <sup>157</sup>       | P | Pr | Migraine – presenting to emergency department           | 83 (NR)   | TENS (HF) + rescue medication = 39                            | Placebo TENS (0mA) + rescue medication = 39                                                                                                                                                                                                                                                                                          | Fixed<br>1 x 20mins                                          | Pain intensity (VAS)                                             | Analgesic consumption                                                                                                                                                                                                                                |
| Hou et al., 2002 <sup>158</sup>           | P | E  | Cervical Myofascial Pain and Trigger Point Sensitivity  | 71 (59W)  | TENS (HF) + hot pack active ROM + stretch with spray (B5) = 9 | Hot pack + active ROM + stretch with spray (SoC, no TENS) (B4) = 10<br>Ischemic compression + TENS (HF) + hot pack + active range of motion + = 9<br>Hot pack + active range of motion + ischemic compression = 12<br>Hot pack + active range of motion = 21<br>IFT+ myofascial release + Hot pack + active range of motion (B6) = 9 | Fixed<br>1 x 20 mins<br>1 session                            | Pain intensity (VAS)                                             | Pressure pain threshold and tolerance (algometry)<br>Range of motion                                                                                                                                                                                 |
| Hruby et al., 2006 <sup>159</sup>         | P | Pr | Procedure pain - Office-based flexible cystoscopy       | 148 (40W) | TENS (HF) = 48                                                | Placebo TENS (0mA) = 49<br>No treatment (no analgesics) = 51                                                                                                                                                                                                                                                                         | Fixed<br>< 5min During procedure<br>1 session                | Pain intensity (VAS)                                             | International Prostate Symptom Score questionnaire<br>Changes in vital signs and IPSS                                                                                                                                                                |
| Hsieh and Lee, 2002 <sup>160</sup>        | P | E  | Back pain - chronic low non-specific                    | 133 (89W) | TENS + Medication = 49                                        | Medication - Diclofenac (NSAID), mephenoxalone (muscle relaxant) and antacid (SoC, no TENS) = 31<br>PENS + medication = 53                                                                                                                                                                                                           | Fixed<br>1 x 15 mins<br>1 session                            | Pain intensity (VAS)                                             | Pain drawing instrument<br>Pressure pain threshold (algometry)<br>Quebec Back Pain Disability scale                                                                                                                                                  |
| Hsueh et al., 1997 <sup>161</sup>         | P | E  | Myofascial trigger points                               | 60 (35W)  | TENS (HF) = 20                                                | Placebo electrotherapy (0mA) = 18                                                                                                                                                                                                                                                                                                    | Fixed<br>1 x 20 mins                                         | Pain intensity (VAS)                                             | Pressure algometry (pain threshold)                                                                                                                                                                                                                  |

08\_OL-TABLE1\_IncludedStudies

|                                        |   |    |                                                   |            |                                                             |                                                                                                                           |                                                                               |                                                              |                                                                                                                                                                                                                                                         |
|----------------------------------------|---|----|---------------------------------------------------|------------|-------------------------------------------------------------|---------------------------------------------------------------------------------------------------------------------------|-------------------------------------------------------------------------------|--------------------------------------------------------------|---------------------------------------------------------------------------------------------------------------------------------------------------------------------------------------------------------------------------------------------------------|
|                                        |   |    |                                                   |            |                                                             | Functional electrical muscle stimulation = 22                                                                             | 1 session                                                                     |                                                              | Range of motion                                                                                                                                                                                                                                         |
| Hughes et al., 1988 <sup>162</sup>     | P | Pr | Labour pain                                       | 89 (89W)   | TENS (NR) + opioids rescue = 29                             | Placebo TENS (0mA) + opioids rescue = 30<br>Conventional medication, opioids (SoC, no TENS) = 30                          | PRN<br>24h                                                                    | Pain intensity (VAS)                                         | Analgesic consumption<br>Pain relief (5-point category rank scale)<br>Infant condition<br>Apgar                                                                                                                                                         |
| Husch et al., 2020 <sup>163</sup>      | P | Pr | Post op - thoracotomy                             | 45 (25W)   | TENS (HF) + physiotherapy + analgesics = 15                 | Placebo TENS (fading to 0mA) + physiotherapy + analgesics = 15<br>Control (SoC, physiotherapy) + analgesics = 15          | Fixed<br>3 x 30 mins / day x 2 days<br>6 sessions                             | Pain intensity (VAS)                                         | Analgesic consumption<br>Pulmonary function, respiratory muscle strength                                                                                                                                                                                |
| Ilhanli, 2015 <sup>164</sup>           | P | Pr | chronic low back pain with lumbar disc herniation | 160 (108W) | Conventional TENS (HF)<br>Hot pack, ultrasound and exercise | Group1= Group2= Acupuncture-like TENS, Group3= Brief-intense TENS, Group4= Sham TENS.                                     | Fixed<br>5 days/week for 3 weeks                                              | Pain intensity (VAS)<br><br>Rest Movement                    | Ostwestry<br>Low Back Pain Disability Questionnaire<br>Short-Form 36 physical component<br>Mental component Scores<br>Modified Lumbar Schober test, Straight Leg Raising test and Femoral Stretching test                                               |
| Inal et al., 2016 <sup>165</sup>       | P | Pr | Osteoarthritis - knee                             | 90 (90W)   | TENS (HF) + physiotherapy (hot pack, US, exercise) = 30     | Placebo TENS (0mA) + physiotherapy (hot pack, US, exercise) = 30<br>TENS (LF) physiotherapy (hot pack, US, exercise) = 30 | Fixed<br>1 x 20 mins / day x 5 weeks<br>35 sessions                           | Pain intensity (VAS)<br>• Resting pain<br>• Pain on movement | WOMAC<br>Walking speed (50 metres)<br>Climbing stairs speed (ten stairs)                                                                                                                                                                                |
| Isik et al., 2017 <sup>166</sup>       | P | Pr | Osteoarthritis - knee                             | 105 (80W)  | TENS (HF) = 53                                              | Leech therapy = 52                                                                                                        | Fixed<br>1 x 20min / day x 5 days / week x 3 weeks (in clinic)<br>15 sessions | Pain intensity (VAS)                                         | WOMAC                                                                                                                                                                                                                                                   |
| Jaafarpour et al., 2008 <sup>167</sup> | P | Pr | Post-op - caesarean                               | 108 (108W) | TENS (MF) = 54                                              | Placebo TENS (0mA) = 54                                                                                                   | PRN<br>24h continuous                                                         | Pain intensity (VAS)                                         | Analgesic consumption                                                                                                                                                                                                                                   |
| Jamison et al., 2019 <sup>168</sup>    | P | Pr | Back pain - chronic low non-specific              | 68 (41W)   | TENS (HF) = 35                                              | Usual treatment (SoC, no TENS) = 33                                                                                       | PRN<br>daily x 3 months                                                       | Pain intensity (NRS)<br>• Current pain<br>• Average pain     | Pressure algometry (PPT)<br>Quantitative sensory testing<br>Anxiety, depression, and irritability (NRS)<br>Brief Pain Inventory<br>Pain Disability Inventory (PDI)<br>Pain Catastrophizing Scale (PCS)<br>Hospital Anxiety and Depression Scale (HADS). |
| Jarzem et al., 2005 <sup>169</sup>     | C | E  | Back pain - chronic low non-specific              | 50 (21W)   | TENS (NR, conventional) = 25                                | Placebo TENS (0mA) = 25                                                                                                   | Fixed<br>3 x 20 mins<br>3 sessions                                            | Pain intensity (VAS)                                         | Range of motion<br>Straight leg raising<br>Sit-ups and oblique sit-ups                                                                                                                                                                                  |
| Jensen et al., 1985 <sup>170</sup>     | P | Pr | Arthroscopic knee surgery                         | 90 (18W)   | TENS (HF) = 30                                              | Placebo TENS (0mA) = 30<br>Analgesic (SoC, no TENS control) = 30                                                          | PRN<br>< 7 days - discontinuation day measured                                | Pain intensity (6-point category scale)                      | Analgesic consumption<br>Medicine rating<br>Range of motion<br>Isokinetic muscle examination<br>Leg volume                                                                                                                                              |

08\_OL-TABLE1\_IncludedStudies

|                                              |   |    |                                                                                                                                                                                   |                                        |                                                                 |                                                                                                                                                                                                                           |                                                                 |                                                                                                               |                                                                                                                                                                           |
|----------------------------------------------|---|----|-----------------------------------------------------------------------------------------------------------------------------------------------------------------------------------|----------------------------------------|-----------------------------------------------------------------|---------------------------------------------------------------------------------------------------------------------------------------------------------------------------------------------------------------------------|-----------------------------------------------------------------|---------------------------------------------------------------------------------------------------------------|---------------------------------------------------------------------------------------------------------------------------------------------------------------------------|
| Jensen et al., 1991 <sup>171</sup>           | P | Pr | Osteoarthritis - knee                                                                                                                                                             | 20 (18W)                               | TENS (HF) = 10                                                  | TENS (LF) = 10                                                                                                                                                                                                            | Fixed<br>1 x 30 mins / day x 5<br>days<br>5 sessions            | Pain intensity (4-<br>point Likert scale)<br>• Resting pain<br>• Pain on<br>movement<br>• Exercise<br>induced | Analgesic consumption (NSAID)                                                                                                                                             |
| Jones and Hutchinson,<br>1991 <sup>172</sup> | C | E  | Post-op pain –<br>abdominal                                                                                                                                                       | 31 (16W)                               | TENS (HF, Para incision) +<br>physiotherapy = 31                | Placebo TENS ('modified placebo'<br>remote site, leg) + physiotherapy =<br>31<br>Entonox + physiotherapy = 31                                                                                                             | Fixed<br>1 x 20 mins<br>1 session                               | Pain intensity<br>(VAS)                                                                                       | Respiratory function<br>Peak expiratory flow rate                                                                                                                         |
| Kara et al., 2011 <sup>173</sup>             | P | Pr | Post-op spinal surgery                                                                                                                                                            | 54 (28W)                               | TENS (AF,) + Meperidine<br>PCA = 25                             | Meperidine PCA (SoC, no TENS<br>control) = 29                                                                                                                                                                             | Fixed<br>2 x 30-<br>40 mins with a 3 to<br>4-hour rest interval | Pain intensity<br>(VAS)<br>• Resting pain<br>• Pain on<br>movement                                            | Analgesic consumption<br>Beck Depression Inventory<br>Timed Up and Go (TUG) test                                                                                          |
| Kararmaz et al., 2004 <sup>174</sup>         | P | Pr | Procedural pain -<br>during extracorporeal<br>shock wave lithotripsy                                                                                                              | 66 (42W)                               | TENS (HF, conventional) =<br>22                                 | Placebo TENS (active, <SDT) = 22<br>TENS (LF, acupuncture-like) = 22                                                                                                                                                      | Fixed<br>~45-60mins<br>throughout the<br>procedure<br>1 session | Pain intensity<br>(VAS)                                                                                       | Analgesic consumption<br>(Alfentanil)<br>Nausea and vomiting (tally of<br>yes/no)<br>Aldrete score<br>Patients' satisfaction (4-point<br>scale)                           |
| Kayman-Kose et al.,<br>2014 <sup>175</sup>   | P | E  | Post-partum pain<br>following<br>(a) Caesarean section –<br>post operative pain +<br>uterine contractions<br>(b) Vaginal delivery –<br>post trauma pain +<br>uterine contractions | (a) = 50<br>(50W)<br>(b) = 50<br>(50W) | (a) TENS (HF) = 50<br>(b) TENS (HF) = 50                        | (a) Placebo TENS (0mA) = 50<br>(b) Placebo TENS (0mA) = 50                                                                                                                                                                | Fixed<br>1 x 30min<br>1 session                                 | Pain intensity<br>(VAS and verbal<br>rating scale)                                                            | Analgesic consumption                                                                                                                                                     |
| Keskin et al., 2012 <sup>176</sup>           | P | Pr | Back pain – low,<br>pregnancy-related                                                                                                                                             | 79 (79W)                               | TENS (HF) = 20                                                  | Control group (no treatment<br>control) = 21<br>Exercise (SoC) = 19<br>Acetaminophen = 19                                                                                                                                 | 2 x ? mins / week x<br>3 weeks                                  | Pain intensity<br>(VAS)                                                                                       | Roland Morris Disability<br>Questionnaire                                                                                                                                 |
| Kibar et al., 2020 <sup>177</sup>            | P | Pr | Back pain - chronic low<br>non-specific                                                                                                                                           | 123<br>(87W)                           | TENS (HF) + hot pack +<br>exercise + rescue<br>paracetamol = 31 | Placebo TENS (Sham TENS/IFT<br>device, 0mA) + hot pack + exercise<br>+ rescue paracetamol = 30<br>IFT + hot pack + exercise + rescue<br>paracetamol = 30<br>TENS + IFT + hot pack + exercise<br>+ rescue paracetamol = 32 | 1 x 30 mins / day x 5<br>/ week x 3 weeks<br>15 sessions        | Pain intensity<br>(VAS)<br>• During activity                                                                  | Lumbar range of motion (ROM)<br>via inclinometer and modified<br>Schober test, patient<br>and physician global assessments.<br>Rolland-Morris Disability<br>Questionnaire |
| Kim et al., 2012 <sup>178</sup>              | P | E  | Pain during venous<br>cannulation                                                                                                                                                 | 100<br>(60W)                           | TENS (HF) = 50                                                  | Placebo TENS (0mA) = 50                                                                                                                                                                                                   | Fixed<br>1 x 20 min before<br>cannulation<br>1 session          | Pain intensity<br>(NRS)                                                                                       | Adverse effects                                                                                                                                                           |
| Kim et al., 2014 <sup>179</sup>              | P | Pr | Myofascial pain<br>syndrome<br>Mixed                                                                                                                                              | 99 (86W)                               | TENS (NR) + Ketoprofen<br>(NSAID) patch = 24                    | Ketoprofen (NSAID) patch (SoC) =<br>25                                                                                                                                                                                    | Fixed<br>2 x 20 mins / day x 2<br>weeks                         | Pain intensity<br>(NRS)                                                                                       | Active range of motion<br>Pressure pain threshold<br>(algometry)                                                                                                          |

08\_OL-TABLE1\_IncludedStudies

|                                       |   |    |                                      |            |                                    |                                                                                                   |                                                                                 |                                                                                                                                          |                                                                                                                                                      |
|---------------------------------------|---|----|--------------------------------------|------------|------------------------------------|---------------------------------------------------------------------------------------------------|---------------------------------------------------------------------------------|------------------------------------------------------------------------------------------------------------------------------------------|------------------------------------------------------------------------------------------------------------------------------------------------------|
|                                       |   |    |                                      |            |                                    | Heating pad + ketoprofen (NSAID) patch = 25<br>Topical capsaicin + ketoprofen (NSAID) patch = 25  | 28 sessions                                                                     |                                                                                                                                          | Neck Disability Index (NDI)<br>Safety                                                                                                                |
| Kirupa et al., 2019 <sup>180</sup>    | P | Pr | Temporomandibular joint              | 30 (NR)    | TENS (HF) = 15                     | Ultrasound = 15                                                                                   | Fixed<br>1 x 15 mins / day x unclear /week x 4 weeks<br>? 10 sessions           | Pain intensity (VAS)                                                                                                                     | None                                                                                                                                                 |
| Knobel et al., 2005 <sup>181</sup>    | P | Pr | Labour pain                          | 60 (60W)   | TENS (HF, 'tablet electrode') = 20 | Placebo TENS (0mA) = 20<br>TENS using silver spike point electrode = 20                           | PRN<br>1 x 120 mins                                                             | Pain intensity (VAS)                                                                                                                     | Analgesic consumption<br>Epidural analgesia<br>Pain relief (calculated from pain intensity (VAS)<br>Discomfort (NR)                                  |
| Koca et al., 2014 <sup>182</sup>      | P | Pr | Carpal tunnel syndrome               | 75 (43W)   | TENS (HF) = 25                     | IFT = 25<br>Splint therapy = 25                                                                   | Fixed<br>1 x 20 mins / day x 5 days / week x 3 weeks<br>15 sessions             | Pain intensity (VAS)                                                                                                                     | Symptom severity scale<br>BCTQ<br>Neurophysiology (median motor nerve latency and sensory nerve conduction velocity)                                 |
| Kofotolis et al., 2008 <sup>183</sup> | P | Pr | Back pain - chronic low non-specific | 92 (92W)   | TENS (LF) = 23                     | Placebo TENS (0mA) = 23<br>Rhythmic stabilisation = 23<br>TENS (LF) + Rhythmic stabilisation = 23 | Fixed<br>1 x 40-45 mins x 5 days/week x 4 weeks<br>20 sessions                  | Pain intensity (VAS/BORG)                                                                                                                | Physical activity questionnaire<br>Oswestry Low Back Pain Disability Questionnaire<br>Range of motion<br>Flexion and extension trunk endurance tests |
| Koke et al., 2004 <sup>184</sup>      | C | Pr | Chronic pain                         | 180 (116W) | TENS (HF, HI, >SDT) = 62           | Control (HF, intensity of choice) = 60<br>TENS (HF, LI, SDT) = 58                                 | PRN<br>30 mins (HI) or 60 mins (LI) 4 to 6 times / day x 2 weeks<br>56 sessions | Pain intensity (VAS)                                                                                                                     | Desire to continue (TENS continuation questionnaire)                                                                                                 |
| Korkmaz et al., 2010 <sup>185</sup>   | P | Pr | Shoulder pain                        | 40 (28W)   | TENS (HF) + exercise = 20          | Pulsed radiofrequency + exercise = 20                                                             | Fixed<br>1 x 20 mins /day x 5 / week<br>20 sessions                             | Pain intensity (VAS)<br>• Resting pain (maximum and mean)<br>• Pain on movement (maximum and mean)<br>• Pain at night (maximum and mean) | Range of motion<br>Shoulder Pain and Disability Index<br>SF-36                                                                                       |
| Kumar and Raje, 2014 <sup>186</sup>   | P | Pr | Tension-type headache                | 36 (20W)   | TENS (LF) = 17                     | Exercises - Progressive muscular relaxation (SoC) = 19                                            | Fixed<br>1 x 15 mins / day x 7 days<br>7 sessions                               | Pain intensity (VAS)                                                                                                                     | Lakaev Academic Stress Response Scale                                                                                                                |
| Labrecque et al., 1999 <sup>187</sup> | P | E  | Labour pain (Low back pain)          | 34 (34W)   | TENS (HF) = 12                     | Standard care (massage, whirlpool bath, mobilisation, SoC, no TENS) = 12                          | PRN<br>During labour                                                            | Pain intensity (VAS)                                                                                                                     | Analgesic consumption (narcotics)<br>Pain unpleasantness (VAS)<br>Labour Agency Scale (LAS)                                                          |



08\_OL-TABLE1\_IncludedStudies

|                                            |   |    |                                                         |              |                                                            |                                                                                                                                  |                                                                |                                                                     |                                                                                                                  |
|--------------------------------------------|---|----|---------------------------------------------------------|--------------|------------------------------------------------------------|----------------------------------------------------------------------------------------------------------------------------------|----------------------------------------------------------------|---------------------------------------------------------------------|------------------------------------------------------------------------------------------------------------------|
|                                            |   |    |                                                         |              |                                                            | Intracutaneous sterile water injections (as a treatment) = 11                                                                    |                                                                |                                                                     | Labour and Delivery Satisfaction Index                                                                           |
| Laitinen and Nuutinen, 1991 <sup>188</sup> | P | Pr | Post-op cholecystectomy                                 | 60 (53W)     | TENS (HF) + Indomethacin = 20                              | Control opioid analgesics (SoC, no TENS or Indomethacin) = 10<br>Indomethacin = 10<br>TENS (LF) + Indomethacin = 20              | Unclear<br>> 16 hours                                          | Pain intensity (4 point categorical)                                | Analgesic consumption (Opioid)<br>Blood pressure<br>Heart rate<br>Respiratory frequency<br>Reported side effects |
| Lang et al., 2007 <sup>189</sup>           | P | Pr | Acute Posttraumatic hip pain during emergency transport | 101 (58W)    | TENS (HF) = 30                                             | Placebo TENS (0mA) = 33                                                                                                          | Fixed<br>~30 mins throughout transport to hospital             | Pain intensity (VAS)                                                | Anxiety (VAS)<br>Morphometric characteristics                                                                    |
| Langley et al., 1984 <sup>190</sup>        | P | E  | Rheumatoid arthritis (hand) + chronic pain (hand)       | 33 (24W)     | TENS (HF) = 11                                             | Placebo TENS (0mA) = 11<br>TENS (LF, acupuncture-like) = 11                                                                      | Fixed<br>1 x 20 mins<br>1 session                              | Pain intensity (VAS)<br>• Resting pain<br>• Pain on movement (grip) | Pressure algometry (joint tenderness)<br>Grip strength                                                           |
| Lauretti et al., 2013 <sup>191</sup>       | P | Pr | Fibromyalgia                                            | 39 (34W)     | TENS (AF, single device) + placebo TENS device = 13        | Placebo TENS (0mA, 2 devices) = 10<br>TENS (AF, two devices) = 13                                                                | Fixed<br>1 x 20min every 12 h x 7 days                         | Pain intensity (VAS)                                                | Analgesic consumption<br>Quality of sleep and fatigue                                                            |
| Lauretti et al., 2015 <sup>192</sup>       | P | Pr | Dysmenorrhea                                            | 40 (40W)     | TENS (Alternating between HF continuous, LF burst) = 20    | Placebo TENS (0mA) = 20                                                                                                          | Fixed<br>1 x 30mins at 8 h interval x 7 days<br>~14 sessions   | Pain intensity (VAS)                                                | Analgesic consumption (Diclofenac)<br>Quality of life questionnaire                                              |
| Law and Cheing, 2004 <sup>193</sup>        | P | Pr | Osteoarthritis - knee                                   | 34 (unclear) | TENS (HF) = 12                                             | Placebo TENS (0mA) = 10<br>TENS (LF) = 13<br>TENS (AF 2/100pps) = 13                                                             | Fixed<br>1 x 40 mins / day x 5 / week x 2 weeks<br>10 sessions | Pain intensity (VAS)<br>• Pain on movement                          | Range of motion<br>Time-up-and-Go                                                                                |
| Law et al., 2004 <sup>194</sup>            | P | Pr | Osteoarthritis - knee                                   | 39 (37W)     | TENS (HF) = 22                                             | Placebo TENS (0mA) = 17                                                                                                          | Fixed<br>1 x 40 mins / day x 5 days x 2 weeks<br>10 sessions   | Pain intensity (VAS)<br>• Pain on movement                          | Range of motion<br>Timed-up-and-Go                                                                               |
| Leandri et al., 1990 <sup>195</sup>        | P | Pr | Post stroke - Hemiplegic shoulder pain                  | 60 (44W)     | TENS (HF) = 20                                             | Placebo TENS (0mA) = 20<br>TENS (HF, LI) = 20                                                                                    | Fixed<br>3 days week x 4 weeks<br>12 sessions                  | No primary outcome                                                  | Range of motion - pain free                                                                                      |
| Lee et al., 1990 <sup>196</sup>            | P | Pr | Labour pain                                             | 125 (125W)   | TENS (HF continuous, LF burst) + analgesics on demand = 58 | Placebo TENS (0mA) + analgesics on demand = 33<br>No treatment (pethidine injections and Entonox inhalation) (SoC, no TENS) = 34 | PRN<br>During labour                                           | Pain intensity (NRS)                                                | Analgesic consumption<br>Pain interval<br>TENS satisfaction questionnaire                                        |
| Lee et al., 2015 <sup>197</sup>            | P | Pr | Post-op Colle's fracture                                | 36 (NR)      | TENS (HF) = 18                                             | Placebo TENS (0mA) = 18                                                                                                          | Fixed<br>1 x 15min / day x 5 days                              | Pain intensity (VAS)                                                | Analgesic consumption (PCS morphine and Cataflan)                                                                |
| Lee et al., 2019 <sup>198</sup>            | C | E  | Cancer pain - head and neck                             | 41 (6W)      | TENS (HF) = 40                                             | Placebo TENS (fading) = 40<br>No treatment = 40                                                                                  | Fixed<br>1 x 30 mins x 1 / week<br>1 session                   | Pain intensity (VAS)                                                | McGill Pain Questionnaire<br>Perception of TENS effectiveness (VAS)<br>Oral function tasks<br>Fatigue (VAS)      |
| Leo et al., 1986 <sup>199</sup>            | C | E  | Mixed pain                                              | 192 (NR)     | TENS (HF, 60pps, 250us, tolerance) = 16                    | TENS (HF, 60pps, 50us, tolerance) = 16                                                                                           | Fixed<br>1 x 30 mins<br>1 session                              | Pain intensity (VAS)                                                | None                                                                                                             |

08\_OL-TABLE1\_IncludedStudies

|                                             |   |    |                                                    |           |                                                            |                                                                                                                                                                                                                                                                                                                                                                                     |                                                           |                                                                |                                                                                                                                           |  |
|---------------------------------------------|---|----|----------------------------------------------------|-----------|------------------------------------------------------------|-------------------------------------------------------------------------------------------------------------------------------------------------------------------------------------------------------------------------------------------------------------------------------------------------------------------------------------------------------------------------------------|-----------------------------------------------------------|----------------------------------------------------------------|-------------------------------------------------------------------------------------------------------------------------------------------|--|
|                                             |   |    |                                                    |           |                                                            | TENS (HF, 60pps, 250us, <SDT) = 16<br>TENS (HF, 60pps, 50us, <SDT) = 16<br>TENS (HF, 60pps, 250us, SDT) = 16<br>TENS (HF, 60pps, 50us, SDT) = 16<br>TENS (LF, 3pps, 250us, tolerance) = 16<br>TENS (LF, 3pps, 50us, tolerance) = 16<br>TENS (LF, 3pps, 250us, SDT) = 16<br>TENS (LF, 3pps, 50us, SDT) = 16<br>TENS (LF, 3pps, 250us, <SDT) = 16<br>TENS (LF, 3pps, 50us, <SDT) = 16 |                                                           |                                                                |                                                                                                                                           |  |
| Leonard et al., 2011 <sup>200</sup>         | C | E  | Chronic pain - various                             | 23 (15W)  | TENS (HF, conventional) = 23                               | TENS (LF, acupuncture-like) = 23                                                                                                                                                                                                                                                                                                                                                    | Fixed<br>1 x 25 mins<br>1 session                         | Pain intensity (NRS)                                           | Pain unpleasantness (NRS)<br>The Patient Global Impression of Change (PGIC) scale                                                         |  |
| Lewers et al., 1989 <sup>201</sup>          | P | E  | Dysmenorrhea - primary                             | 21 (21W)  | TENS (LF, acupuncture-like) = 10                           | Placebo pill = 11                                                                                                                                                                                                                                                                                                                                                                   | Fixed<br>1 x 30 mins<br>1 session                         | Pain intensity (VAS)                                           | McGill Pain Questionnaire<br>Pain rating index                                                                                            |  |
| Lewis et al., 1984 <sup>202</sup>           | C | E  | Osteoarthritis - knee                              | 30 (22W)  | TENS (HF) = 30                                             | Placebo TENS (0mA) = 30                                                                                                                                                                                                                                                                                                                                                             | Fixed<br>3 x 30-60 mins / day<br>x 3 weeks<br>21 sessions | Pain intensity (VAS)                                           | Analgesic consumption<br>Paracetamol intake<br>Duration of pain relief<br>Pain free range of motion<br>Questionnaire of patients' opinion |  |
| Lewis et al., 1994 <sup>203</sup>           | C | E  | Osteoarthritis - knee                              | 36 (21W)  | TENS (HF) + placebo pills = 36                             | Placebo TENS (0mA) + placebo pills = 36<br>Placebo TENS (0mA) + Naproxen (SoC, sham TENS) = 36                                                                                                                                                                                                                                                                                      | PRN<br>> 3 x 30-60 mins / day x 3 weeks                   | Pain intensity (VAS)                                           | Pain relief (VAS)<br>Pain Index for the Knee<br>Patient Opinion of Treatment<br>Efficacy<br>Piper Pain Intensity Scale                    |  |
| Likar et al., 2001 <sup>204</sup>           | P | Pr | Postop pain                                        | 30 (9W)   | TENS (HF) + analgesics = 11                                | Placebo TENS (0mA) + analgesics = 12                                                                                                                                                                                                                                                                                                                                                | PRN                                                       | Pain intensity (VAS)<br>• At rest<br>• On movement (abduction) | Analgesic consumption - time of taking the 1st analgesic<br>Blood pressure,<br>Heart rate,<br>Respiratory rate,<br>Side effects,          |  |
| Lim et al., 1983 <sup>205</sup>             | P | Pr | Postop pain - abdominal                            | 30 (17W)  | TENS (NR) = 15                                             | Placebo TENS (0mA) = 15                                                                                                                                                                                                                                                                                                                                                             | PRN                                                       | Pain intensity (VAS)                                           | Analgesic consumption (morphine)                                                                                                          |  |
| Lima et al., 2011 <sup>206</sup>            | P | Pr | Post-op - coronary artery bypass graft             | 20 (10W)  | TENS (HF) + usual care (Physiotherapy and analgesics) = 10 | Usual care (Physiotherapy and analgesics, SoC, no TENS) = 10                                                                                                                                                                                                                                                                                                                        | Fixed<br>1 x 30 mins x 3 / day                            | Pain intensity (VAS)                                           | Analgesic consumption<br>Muscle strength (MIP) and expiratory muscle strength (MEP)<br>Functional residual capacity (FRC)                 |  |
| Limoges and Rickabaugh, 2004 <sup>207</sup> | P | Pr | Procedural pain - Screening flexible sigmoidoscopy | 90 (39 W) | TENS (HF) = 30                                             | Placebo TENS (0mA) = 30<br>Verbal encouragement (SoC, no TENS) = 30                                                                                                                                                                                                                                                                                                                 | Fixed                                                     | Pain intensity (NRS, categorical scale)                        | McGill Pain Questionnaire<br>12-item questionnaire (Bloating, nausea, electrode site burning or                                           |  |

08\_OL-TABLE1\_IncludedStudies

|                                            |   |    |                                           |            |                                                                                          |                                                                                                           |                                                             |                                               |                                                                                                                                                                                                                           |
|--------------------------------------------|---|----|-------------------------------------------|------------|------------------------------------------------------------------------------------------|-----------------------------------------------------------------------------------------------------------|-------------------------------------------------------------|-----------------------------------------------|---------------------------------------------------------------------------------------------------------------------------------------------------------------------------------------------------------------------------|
|                                            |   |    |                                           |            |                                                                                          |                                                                                                           | 10-20 mins throughout procedure<br>1 session                |                                               | tingling, present versus previous SFS pain comparison, and degree of procedural difficulty)                                                                                                                               |
| Lin et al., 2015 <sup>208</sup>            | P | Pr | Shoulder pain – chronic                   | 33 (25W)   | TENS (LF, 2Hz) = 17                                                                      | Transcutaneous pulsed radiofrequency = 16                                                                 | Fixed<br>1 x 15 mins x 3 / week x 1 week<br>3 sessions      | Pain intensity (VAS)                          | Serum cortisol level                                                                                                                                                                                                      |
| Lin et al., 2019 <sup>209</sup>            | P | Pr | Shoulder pain – chronic                   | 50 (34W)   | TENS (HF) = 25                                                                           | Transcutaneous pulsed radiofrequency = 25                                                                 | Fixed<br>1 x 15 mins every other day x 1 week<br>3 sessions | Pain intensity (VAS)                          | Treatment comfort level<br>Constant–Murley shoulder (CMS) score<br>PEG (pain, enjoyment of life, and general activity) score                                                                                              |
| Linde et al., 1995 <sup>210</sup>          | P | Pr | Temporomandibular joint disk displacement | 31 (26W)   | TENS (HF) = 16                                                                           | Flat occlusal splint (SoC, no TENS) = 15                                                                  | Fixed<br>3 x 30 mins / day x 6 weeks<br>66 sessions         | Pain intensity (VAS)                          | Frequency and intensity of complaints (6-step verbal scale)<br>Pain-Track system (pain intensity VAS, sleep or waking hours, mealtimes)                                                                                   |
| Linn et al., 1999 <sup>211</sup>           | P | Pr | Post-stroke – shoulder subluxation        | 40 (22W)   | TENS (HF, AM) + standard care (conventional physiotherapy and occupational therapy) = 20 | Standard care (conventional physiotherapy and occupational therapy, SoC, no TENS) = 20                    | Fixed<br>4 x 30-60 mins / day x 4 weeks<br>112 sessions     | Pain intensity (5-point NRS)                  | Pain free range of motion<br>Shoulder subluxation (radiological)<br>Upper arm girth                                                                                                                                       |
| Lison et al., 2017 <sup>212</sup>          | P | Pr | Procedural pain - office hysteroscopy     | 138 (138W) | TENS (RF) = 46                                                                           | Placebo TENS (0mA) = 46<br>Standard care without analgesia (SoC, no TENS) = 46                            | Fixed<br>5-30 mins throughout procedure<br>1 session        | Pain intensity (VAS and 5-point verbal scale) | Duration of the procedure<br>Vital parameters<br>Vasovagal symptoms<br>Unusual or adverse TENS events<br>Level of satisfaction with the procedure (NRS)                                                                   |
| Liu et al., 1985 <sup>213</sup>            | P | Pr | Post-op - thoracotomy                     | 30 (8W)    | TENS (NR) = 15                                                                           | Placebo TENS (active, <SDT) = 15                                                                          | Fixed<br>1 x 20min / day x 10days<br>10 sessions            | Pain intensity (NRS)                          | Passive range of motion<br>Functional activities score                                                                                                                                                                    |
| Liu et al., 2017 <sup>214</sup>            | P | Pr | Migraine                                  | 110 (87W)  | TENS (HF, TONS) = 22                                                                     | Placebo TENS (0mA) = 22<br>Topiramate (SoC, no TENS) = 22<br>TENS (LF, TONS) = 22<br>TENS (AF, TONS) = 22 | Fixed<br>1 x 30m/day x 4 weeks<br>28 sessions               | Pain intensity (VAS)                          | Analgesic consumption<br>Headache diary (frequency, headache intensity, duration)<br>Self-rating depression scale (SDS)<br>Self-rating anxiety scale (SAS)<br>Headache Impact Test<br>Patient satisfaction with treatment |
| Lofgren and Norrbrink, 2009 <sup>215</sup> | C | E  | Fibromyalgia                              | 32 (32W)   | TENS (HF) = 16                                                                           | Heat therapy (Superficial warmth) = 16                                                                    | PRN<br>1 x >30 mins / session as needed x 3 weeks           | Pain intensity (VAS, NRS)                     | Duration of analgesia<br>Fibromyalgia impact questionnaire<br>Treatment preference                                                                                                                                        |
| Luchesa et al., 2009 <sup>216</sup>        | P | Pr | Post-op coronary artery bypass graft      | 30 (5W)    | TENS (HF) = 15                                                                           | Placebo TENS (0mA) = 15                                                                                   | PRN<br>2 x 50 min / day x 5 days                            | Pain intensity (NRS)                          | Expiratory flux peak<br>Forced vital capacity<br>Forced expiratory volume                                                                                                                                                 |
| Lundeberg, 1984 <sup>217</sup>             | C | Pr | Myalgia - chronic                         | 36 (20W)   | TENS (HF) = 9                                                                            | Placebo pill = 9<br>EA = 9<br>Vibration = 9                                                               | Fixed<br>~ 2 x 45 mins / week x 3 weeks<br>6 sessions       | Pain intensity (VAS)                          | Duration of pain relief                                                                                                                                                                                                   |

08\_OL-TABLE1\_IncludedStudies

|    |                                                 |   |    |                                             |              |                                                                                                                              |                                                                                                                                                                  |                                                                                   |                                                                                                 |                                                                                                                                                                                          |
|----|-------------------------------------------------|---|----|---------------------------------------------|--------------|------------------------------------------------------------------------------------------------------------------------------|------------------------------------------------------------------------------------------------------------------------------------------------------------------|-----------------------------------------------------------------------------------|-------------------------------------------------------------------------------------------------|------------------------------------------------------------------------------------------------------------------------------------------------------------------------------------------|
| 1  |                                                 |   |    |                                             |              |                                                                                                                              |                                                                                                                                                                  |                                                                                   |                                                                                                 |                                                                                                                                                                                          |
| 2  |                                                 |   |    |                                             |              |                                                                                                                              |                                                                                                                                                                  |                                                                                   |                                                                                                 |                                                                                                                                                                                          |
| 3  | Lundeberg et al., 1985 <sup>218</sup>           | C | E  | Dysmenorrhea - primary                      | 21 (21W)     | TENS (HF) = 21                                                                                                               | Placebo TENS =21 (0mA)<br>TENS (LF, burst) = 21                                                                                                                  | Fixed<br>1 x 45 mins<br>1 session                                                 | Pain intensity (VAS)                                                                            | Analgesic consumption McGill<br>Pain Questionnaire<br>Duration of pain relief                                                                                                            |
| 4  |                                                 |   |    |                                             |              |                                                                                                                              |                                                                                                                                                                  |                                                                                   |                                                                                                 |                                                                                                                                                                                          |
| 5  | Machado et al., 2019 <sup>219</sup>             | P | E  | Dysmenorrhea                                | 88 (88W)     | TENS (HF) + placebo<br>thermotherapy = 22                                                                                    | Placebo TENS + placebo<br>thermotherapy = 22<br>Thermotherapy (microwave<br>diathermy) + placebo TENS = 22<br>TENS + Thermotherapy<br>(microwave diathermy) = 22 | Fixed<br>1 x 30 mins<br>1 session                                                 | Pain intensity (NRS)                                                                            | McGill Pain Questionnaire<br>Conditioned pain modulation test                                                                                                                            |
| 6  |                                                 |   |    |                                             |              |                                                                                                                              |                                                                                                                                                                  |                                                                                   |                                                                                                 |                                                                                                                                                                                          |
| 7  |                                                 |   |    |                                             |              |                                                                                                                              |                                                                                                                                                                  |                                                                                   |                                                                                                 |                                                                                                                                                                                          |
| 8  |                                                 |   |    |                                             |              |                                                                                                                              |                                                                                                                                                                  |                                                                                   |                                                                                                 |                                                                                                                                                                                          |
| 9  |                                                 |   |    |                                             |              |                                                                                                                              |                                                                                                                                                                  |                                                                                   |                                                                                                 |                                                                                                                                                                                          |
| 10 | Machin et al., 1988 <sup>220</sup>              | P | E  | Back pain - chronic low<br>non-specific     | 30 (?NR)     | TENS (HF) = 15                                                                                                               | Placebo TENS = 15<br>(0mA)                                                                                                                                       | Fixed<br>1 x 20 mins/day,<br>unclear x days/week<br>x 3 weeks<br>15 sessions      | Pain intensity (VAS and verbal<br>descriptive scale)                                            | Pain diary information                                                                                                                                                                   |
| 11 |                                                 |   |    |                                             |              |                                                                                                                              |                                                                                                                                                                  |                                                                                   |                                                                                                 |                                                                                                                                                                                          |
| 12 |                                                 |   |    |                                             |              |                                                                                                                              |                                                                                                                                                                  |                                                                                   |                                                                                                 |                                                                                                                                                                                          |
| 13 |                                                 |   |    |                                             |              |                                                                                                                              |                                                                                                                                                                  |                                                                                   |                                                                                                 |                                                                                                                                                                                          |
| 14 | Mahure et al., 2017 <sup>221</sup>              | P | Pr | Post-op arthroscopic<br>rotator cuff repair | 37 (19W)     | TENS (HF) = 21                                                                                                               | Placebo TENS = 16<br>(0mA)                                                                                                                                       | Fixed<br>4 x 45 min /day<br>x 7 days<br>28 sessions                               | Pain intensity (VAS)                                                                            | Analgesic consumption<br>(Narcotic)                                                                                                                                                      |
| 15 |                                                 |   |    |                                             |              |                                                                                                                              |                                                                                                                                                                  |                                                                                   |                                                                                                 |                                                                                                                                                                                          |
| 16 |                                                 |   |    |                                             |              |                                                                                                                              |                                                                                                                                                                  |                                                                                   |                                                                                                 |                                                                                                                                                                                          |
| 17 | Manigandan et al.,<br>2014 <sup>222</sup>       | P | Pr | Post stroke -<br>subluxation                | 24 (7W)      | TENS (HF, at supraspinatus,<br>posterior deltoid<br>+ long head of biceps) +<br>physiotherapy + occupational<br>therapy = 12 | TENS (HF, at supraspinatus and<br>posterior deltoid)<br>+ physiotherapy<br>+ occupational therapy = 12                                                           | Fixed<br>1 x 30-60mins / day<br>x 5 weeks<br>35 sessions                          | No primary<br>outcome                                                                           | Shoulder subluxation in mm (x-<br>ray)<br>Pain - free range of passive lateral<br>rotation and active shoulder<br>abduction range of motion                                              |
| 18 |                                                 |   |    |                                             |              |                                                                                                                              |                                                                                                                                                                  |                                                                                   |                                                                                                 |                                                                                                                                                                                          |
| 19 |                                                 |   |    |                                             |              |                                                                                                                              |                                                                                                                                                                  |                                                                                   |                                                                                                 |                                                                                                                                                                                          |
| 20 |                                                 |   |    |                                             |              |                                                                                                                              |                                                                                                                                                                  |                                                                                   |                                                                                                 |                                                                                                                                                                                          |
| 21 |                                                 |   |    |                                             |              |                                                                                                                              |                                                                                                                                                                  |                                                                                   |                                                                                                 |                                                                                                                                                                                          |
| 22 | Mannheimer and<br>Carlsson, 1979 <sup>223</sup> | C | E  | Rheumatoid arthritis                        | 20 (13W)     | TENS (HF) = 20                                                                                                               | TENS (LF) = 20<br>TENS (LF, burst) = 20                                                                                                                          | Fixed<br>1 x 10 mins<br>1 session                                                 | Pain intensity (5-<br>point scale)                                                              | Loading test (time patient could<br>hold weight)<br>Duration of analgesia                                                                                                                |
| 23 |                                                 |   |    |                                             |              |                                                                                                                              |                                                                                                                                                                  |                                                                                   |                                                                                                 |                                                                                                                                                                                          |
| 24 | Mannheimer and<br>Whalen, 1985 <sup>224</sup>   | P | Pr | Dysmenorrhea                                | 27 (27W)     | TENS (HF) = 9                                                                                                                | Placebo TENS (0mA) = 9<br>TENS (LF, acupuncture-like) = 9                                                                                                        | Fixed<br>1 x 30 mins<br>1 session                                                 | Pain intensity (VAS)                                                                            | Total number of painful days<br>Duration of pain relief                                                                                                                                  |
| 25 |                                                 |   |    |                                             |              |                                                                                                                              |                                                                                                                                                                  |                                                                                   |                                                                                                 |                                                                                                                                                                                          |
| 26 | Mannheimer et al.,<br>1978 <sup>225</sup>       | C | E  | Rheumatoid arthritis                        | 19 (17W)     | TENS (HF, SBC at pain,<br>Group 1) = 19                                                                                      | TENS (SDT at pain, group 2) = 19<br>TENS (HF, SDT at remote site,<br>Group 3) = 19                                                                               | Fixed<br>5 mins / day x 15<br>days<br>15 sessions                                 | No primary<br>outcome                                                                           | Degree of pain relief<br>Loading test (time patient could<br>hold weight)                                                                                                                |
| 27 |                                                 |   |    |                                             |              |                                                                                                                              |                                                                                                                                                                  |                                                                                   |                                                                                                 |                                                                                                                                                                                          |
| 28 |                                                 |   |    |                                             |              |                                                                                                                              |                                                                                                                                                                  |                                                                                   |                                                                                                 |                                                                                                                                                                                          |
| 29 |                                                 |   |    |                                             |              |                                                                                                                              |                                                                                                                                                                  |                                                                                   |                                                                                                 |                                                                                                                                                                                          |
| 30 | Mannheimer et al.,<br>1985 <sup>226</sup>       | P | Pr | Severe angina pectoris                      | 23 (4W)      | TENS (HF) + antianginal<br>medication as needed = 12                                                                         | Antianginal medication (SoC, no<br>TENS, 'no treatment' control) = 11                                                                                            | Fixed<br>3 x 60 mins / day x<br>10 weeks during<br>anginal attacks<br>30 sessions | Pain intensity (5-<br>point scale)                                                              | Recovery time (min)<br>Frequency of anginal attacks<br>Consumption nitroglycerin<br>Work during exercise<br>Pulse rate, blood pressure<br>Dyspnoea (5-point scale)<br>Electrocardiograms |
| 31 |                                                 |   |    |                                             |              |                                                                                                                              |                                                                                                                                                                  |                                                                                   |                                                                                                 |                                                                                                                                                                                          |
| 32 |                                                 |   |    |                                             |              |                                                                                                                              |                                                                                                                                                                  |                                                                                   |                                                                                                 |                                                                                                                                                                                          |
| 33 |                                                 |   |    |                                             |              |                                                                                                                              |                                                                                                                                                                  |                                                                                   |                                                                                                 |                                                                                                                                                                                          |
| 34 |                                                 |   |    |                                             |              |                                                                                                                              |                                                                                                                                                                  |                                                                                   |                                                                                                 |                                                                                                                                                                                          |
| 35 |                                                 |   |    |                                             |              |                                                                                                                              |                                                                                                                                                                  |                                                                                   |                                                                                                 |                                                                                                                                                                                          |
| 36 | Mansourian et al.,<br>2019 <sup>227</sup>       | P | Pr | TMJ - Myofascial pain                       | 108<br>(88W) | TENS (HF) + medication =<br>NR (36)                                                                                          | Medication Control (SoC, no<br>intervention) = NR (36)<br>LLLT + medication = NR (36)                                                                            | Fixed<br>1 x 10 mins / day x 3<br>/ week x 3 weeks<br>10 sessions                 | Pain intensity (VAS)<br>• at rest<br>• on movement -<br>variety of face<br>and jaw<br>movements | Mouth opening<br>Lateral protrusive<br>movements                                                                                                                                         |
| 37 |                                                 |   |    |                                             |              |                                                                                                                              |                                                                                                                                                                  |                                                                                   |                                                                                                 |                                                                                                                                                                                          |
| 38 |                                                 |   |    |                                             |              |                                                                                                                              |                                                                                                                                                                  |                                                                                   |                                                                                                 |                                                                                                                                                                                          |
| 39 |                                                 |   |    |                                             |              |                                                                                                                              |                                                                                                                                                                  |                                                                                   |                                                                                                 |                                                                                                                                                                                          |
| 40 |                                                 |   |    |                                             |              |                                                                                                                              |                                                                                                                                                                  |                                                                                   |                                                                                                 |                                                                                                                                                                                          |
| 41 |                                                 |   |    |                                             |              |                                                                                                                              |                                                                                                                                                                  |                                                                                   |                                                                                                 |                                                                                                                                                                                          |
| 42 |                                                 |   |    |                                             |              |                                                                                                                              |                                                                                                                                                                  |                                                                                   |                                                                                                 |                                                                                                                                                                                          |
| 43 |                                                 |   |    |                                             |              |                                                                                                                              |                                                                                                                                                                  |                                                                                   |                                                                                                 |                                                                                                                                                                                          |
| 44 |                                                 |   |    |                                             |              |                                                                                                                              |                                                                                                                                                                  |                                                                                   |                                                                                                 |                                                                                                                                                                                          |
| 45 |                                                 |   |    |                                             |              |                                                                                                                              |                                                                                                                                                                  |                                                                                   |                                                                                                 |                                                                                                                                                                                          |
| 46 |                                                 |   |    |                                             |              |                                                                                                                              |                                                                                                                                                                  |                                                                                   |                                                                                                 |                                                                                                                                                                                          |

08\_OL-TABLE1\_IncludedStudies

|                                        |   |    |                                                 |           |                                                       |                                                                                                                                                                   |                                                                       |                                |                                                                                                                          |
|----------------------------------------|---|----|-------------------------------------------------|-----------|-------------------------------------------------------|-------------------------------------------------------------------------------------------------------------------------------------------------------------------|-----------------------------------------------------------------------|--------------------------------|--------------------------------------------------------------------------------------------------------------------------|
| Mansuri et al., 2019 <sup>228</sup>    | P | E  | Musculoskeletal pain - Muscle tension dysphonia | 30 (20W)  | TENS (HF) = 15                                        | Placebo TENS (0mA) = 15                                                                                                                                           | Fixed<br>1 x 20 mins<br>1 session                                     | Pain intensity (VAS)           | Vocal tract discomfort scale<br>Extended Nordic musculoskeletal symptoms questionnaire<br>Auditory-perceptual assessment |
| Mansuri et al., 2020 <sup>229</sup>    | P | Pr | Musculoskeletal pain - Muscle tension dysphonia | 20 (20W)  | TENS (LF) + vocal tract training = 10                 | Vocal tract training (SoC) = 10                                                                                                                                   | Fixed<br>1 x 50 mins / day x 2 / week x 2 weeks<br>10 sessions        | Pain intensity (VAS)           | Extended Nordic Musculoskeletal Symptoms Questionnaire<br>Vocal tract discomfort                                         |
| Marchand et al., 1993 <sup>230</sup>   | P | Pr | Back pain - chronic low non-specific            | 42 (22W)  | TENS (HF) = 14                                        | Placebo TENS (0mA) = 12<br>No treatment = 16                                                                                                                      | Fixed<br>1 x 30 mins / day x 2 / week x 10 weeks<br>20 sessions       | Pain intensity (VAS)           | Pain unpleasantness (VAS)                                                                                                |
| Mascarin et al., 2012 <sup>231</sup>   | P | Pr | Osteoarthritis - knee                           | 38 (38W)  | TENS (MF) = 12                                        | Kinesiology taping = 16<br>Ultrasound = 10                                                                                                                        | Fixed<br>1 x 20 mins / day x 2 / week x 12 weeks<br>24 sessions       | Pain intensity (VAS)           | WOMAC<br>Range of motion - knee flexion and extension<br>Six-minute walking test (6-MWT)                                 |
| McCallum et al., 1988 <sup>232</sup>   | P | Pr | Post-op decompressive lumbar laminectomy        | 20 (13W)  | TENS (HF) = 10                                        | Placebo TENS (0mA) = 10                                                                                                                                           | PRN (NR)                                                              | No primary outcome             | Analgesic consumption<br>Plasma morphine concentrations                                                                  |
| Melzack et al., 1983 <sup>233</sup>    | P | Pr | Back pain – acute and chronic low non-specific  | 41 (22W)  | TENS (LF) = 20                                        | Gentle massage = 21                                                                                                                                               | Fixed<br>2 x 30 mins / week x 5 weeks<br>10 sessions                  | Pain intensity (PPI)           | McGill Pain Questionnaire<br>Range of motion                                                                             |
| Merrill, 1989 <sup>234</sup>           | P | Pr | Post-op urologic surgery                        | 96 (0W)   | TENS (NR) + analgesics as needed = 48                 | Analgesics (SoC, no TENS) = 48                                                                                                                                    | PRN                                                                   | No primary outcome             | Analgesic consumption                                                                                                    |
| Miller et al., 2007 <sup>235</sup>     | C | Pr | Spasticity – multiple sclerosis                 | 32 (17W)  | TENS (HF, for 8 hrs) = 32                             | TENS (HF, for 60 mins) = 32                                                                                                                                       | Fixed<br>1 x 8 hours or 60 mins / day x 2 weeks<br>14 sessions        | Pain intensity (VAS)           | Global Spasticity Scale (GSS)<br>Penn Spasm Scale (PSS)<br>TENS experience questionnaire                                 |
| Milsom et al., 1994 <sup>236</sup>     | C | E  | Dysmenorrhea - primary                          | 12 (12W)  | TENS (HF, HI) = 12                                    | Naproxen (500 mg, SoC not TENS) = 12                                                                                                                              | Unclear<br>1 x 10 seconds repeated as necessary                       | Pain intensity (5-point scale) | Uterine contractility and intrauterine pressure                                                                          |
| Moharic et al., 2009 <sup>237</sup>    | P | Pr | Peripheral diabetic neuropathy                  | 65 (NR)   | TENS (HF) = 46                                        | Pregabalin = 5<br>TENS (HF) + Pregabalin = 14                                                                                                                     | Fixed<br>1 x 3h / day x 7 days / week<br>3 weeks<br>21 sessions       | Pain intensity (VAS)           | Pain unpleasantness (VAS)<br>Pain interference with daily activities and sleep (VAS)<br>SF-36                            |
| Mondal et al., 2019 <sup>238</sup>     | P | Pr | Myofascial pain                                 | 109 (86W) | TENS (HF) ++ SoC (exercises + heat + medication) = 34 | Ultrasound therapy + SoC (exercises + heat + medication) = 36<br>Trigger point injection (steroid + local anaesthetic) + SoC (exercises + heat + medication) = 39 | Fixed<br>1 x 20 mins per trigger point / day x 2 weeks<br>14 sessions | Pain intensity (VAS)           | Index score of trigger point after palpation<br>Neck disability Index                                                    |
| Moore and Shurman, 1997 <sup>239</sup> | C | E  | Chronic back pain                               | 24 (16W)  | TENS (HF) = 24                                        | Placebo TENS (0mA) = 24<br>NMES = 24<br>NMES + TENS = 24                                                                                                          | Fixed<br>1 x 5 hours / day x 2 days<br>2 sessions                     | Pain intensity (VAS)           | Pain relief (VAS)                                                                                                        |
| Mora et al., 2006 <sup>240</sup>       | P | Pr | Renal colic in Emergency care                   | 100 (29W) | TENS (HF) = 39                                        | Placebo TENS (sham, 0mA) = 34                                                                                                                                     | Fixed<br>1 x 30 mins<br>1 session                                     | Pain intensity (VAS)           | Anxiety (VAS)<br>Morphometric characteristics                                                                            |

08\_OL-TABLE1\_IncludedStudies

|                                         |   |    |                                                          |            |                                           |                                                                                                                                              |                                                                              |                                                    |                                                                                                                                                         |
|-----------------------------------------|---|----|----------------------------------------------------------|------------|-------------------------------------------|----------------------------------------------------------------------------------------------------------------------------------------------|------------------------------------------------------------------------------|----------------------------------------------------|---------------------------------------------------------------------------------------------------------------------------------------------------------|
| Morgan et al., 1996 <sup>241</sup>      | P | Pr | Procedural pain - Distention shoulder arthrography       | 60 (32W)   | TENS (HF) + Lignocaine = 20               | Placebo TENS (active, ≤SDT) + Lignocaine = 20<br>Lignocaine (SoC, no TENS, control) = 20                                                     | Fixed<br>1 x 20 mins before procedure then throughout procedure<br>1 session | Pain intensity (VAS)                               | None                                                                                                                                                    |
| Møystad et al., 1990 <sup>242</sup>     | C | E  | Rheumatic disease involving the temporomandibular joint. | 19 (17W)   | TENS (HF) = 19                            | Placebo TENS (0mA) = 19<br>TENS (LF) = 19                                                                                                    | Fixed<br>1 x 30 mins<br>1 session                                            | Pain intensity (VAS)<br>• At rest<br>• on movement | Muscle tenderness to palpation (3-point scale)<br>Range of motion                                                                                       |
| Murray et al., 2004 <sup>243</sup>      | C | E  | Angina pectoris                                          | 10 (2W)    | TENS (HF) = 10                            | Placebo pills = 10                                                                                                                           | Fixed<br>3 x 60 mins / day x 2 / week<br>10 sessions                         | No primary outcome                                 | Treadmill exercise tests<br>• exercise time<br>• Time to maximum ST depression<br>• Rate-pressure product at peak exercise<br>• Time to onset of angina |
| Mutlu et al., 2013 <sup>244</sup>       | P | Pr | Fibromyalgia                                             | 66 (66W)   | TENS + Exercise (supervised) = 33         | Supervised exercise (SoC, no TENS) = 33                                                                                                      | Fixed<br>1 x 30 mins / day x 5 days x 5 weeks<br>25 sessions                 | Pain intensity (VAS – within FIQ)                  | Fibromyalgia Impact Questionnaire (FIQ)<br>Tender point count)<br>Myalgic pain score SF-36                                                              |
| Nabi et al., 2015 <sup>245</sup>        | P | Pr | Peripheral diabetic neuropathy                           | 65 (29W)   | TENS (HF) = 30                            | Pulsed radiofrequency = 30                                                                                                                   | Fixed<br>1 x 20 mins every 2 days x 2 weeks<br>10 sessions                   | Pain intensity (NRS)                               | None                                                                                                                                                    |
| Nash et al., 1990 <sup>246</sup>        | P | E  | Chronic pain                                             | 200 (126W) | TENS (HF, continuous, 100pps) = 50        | TENS (HF, continuous, 10pps) = 50<br>TENS (LF, burst, 10pps) = 50<br>TENS (LF, burst 100pps) = 50                                            | PRN<br>< 2 years                                                             | Pain intensity (VAS)                               | Responders (≥50% reduction in pain)<br>Time to ≥50% reduction in pain                                                                                   |
| Navarathnam et al., 1984 <sup>247</sup> | P | Pr | Post-op cardiac surgery                                  | 31 (6W)    | TENS (NR) + analgesics on demand = 14     | Placebo TENS (0mA) + analgesics on demand = 17                                                                                               | PRN                                                                          | Pain intensity (5-point scale)                     | Analgesic consumption<br>Spirometry<br>Experience of cardiac surgery (Questionnaire)                                                                    |
| Neary, 1981 <sup>248</sup>              | P | Pr | Post incisional surgical pain                            | 200 (NR)   | TENS (HF) = 100                           | Morphine sulphate or Meperidine Hydrochloride (SoC, no TENS) = 100                                                                           | PRN<br>1 x 30 mins or as needed                                              | No primary outcome                                 | Analgesic consumption                                                                                                                                   |
| Neighbours et al., 1987 <sup>249</sup>  | P | E  | Dysmenorrhea                                             | 20 (20W)   | TENS (LF, acupuncture-like) = 10          | Placebo pill = 10                                                                                                                            | Fixed<br>1 x 30 mins<br>1 session                                            | Pain intensity (VAS)                               | Analgesic consumption<br>McGill Pain Questionnaire<br>Pain rating index                                                                                 |
| Nesheim, 1981 <sup>250</sup>            | P | Pr | Labour pain                                              | 70 (70W)   | TENS (LF, burst) = 35                     | Placebo TENS (0mA) = 35                                                                                                                      | PRN during labour                                                            | No primary outcome                                 | Pain relief (4-point category scale)                                                                                                                    |
| Neumark et al., 1978 <sup>251</sup>     | P | Pr | Labour pain                                              | 30 (30W)   | TENS (NR) = 10                            | Pethidine (SoC, no TENS) = 5<br>Placebo TENS (0mA) = 5<br>Remote TENS (electrodes in wrong positions) = 5<br>No treatment = 5 (no analgesia) | Fixed<br>70 mins<br>1 session                                                | Pain intensity (6-point scale)                     | None                                                                                                                                                    |
| Ng et al., 2003 <sup>252</sup>          | P | Pr | Osteoarthritis - knee                                    | 24 (23W)   | TENS (LF) + Education about knee care = 8 | Education about knee care (SoC, no TENS) = 8<br>EA + Education about knee care = 8                                                           | Fixed<br>1 x 20 mins on alternative days x each session over 2 weeks         | Pain intensity (NRS)                               | Range of motion<br>Timed Up-and-Go test                                                                                                                 |

08\_OL-TABLE1\_IncludedStudies

|                                                                                                                                                                                           |   |    |                                                      |           |                                                    |                                                                                                                                |                                                                        |                                                    |                                                                                                                                                                                                                                                               |
|-------------------------------------------------------------------------------------------------------------------------------------------------------------------------------------------|---|----|------------------------------------------------------|-----------|----------------------------------------------------|--------------------------------------------------------------------------------------------------------------------------------|------------------------------------------------------------------------|----------------------------------------------------|---------------------------------------------------------------------------------------------------------------------------------------------------------------------------------------------------------------------------------------------------------------|
|                                                                                                                                                                                           |   |    |                                                      |           |                                                    |                                                                                                                                | 8 sessions                                                             |                                                    |                                                                                                                                                                                                                                                               |
| Nordemar and Thorner, 1981 <sup>253</sup>                                                                                                                                                 | P | Pr | Neck pain - acute cervical pain                      | 30 (18W)  | TENS (HF) + neck collar + analgesics = 10          | Neck collar + analgesics (SoC, no TENS) = 10<br>Manual therapy + neck collar + analgesics = 10                                 | Fixed<br>1 x 30 mins x 3 / week<br>3 session                           | Pain intensity (VAS)<br>• at rest<br>• on movement | Analgesic consumption<br>Range of motion                                                                                                                                                                                                                      |
| Norrbrink, 2009 <sup>254</sup>                                                                                                                                                            | C | Pr | Spinal cord injury neuropathic pain                  | 24 (4W)   | TENS (HF) = 24                                     | TENS (LF) = 24                                                                                                                 | Fixed<br>3 x 30 to 40 mins / day x 7 days x 2 weeks<br>42 sessions     | Pain intensity (Borg CR-10)                        | Pain unpleasantness (BORG CR - 10)<br>Global pain relief (5-point scale)<br>Multidimensional Pain Inventory<br>Hospital Anxiety and Depression Scale<br>Nordic Basic Sleep Questionnaire<br>Life Satisfaction Instrument-9<br>Ability to cope with pain (NRS) |
| Olsén et al., 2007 <sup>255</sup>                                                                                                                                                         | P | E  | Postpartum uterine contractions                      | 21 (21W)  | TENS (HF, brief HI) = 12                           | TENS (HF, LI) = 8                                                                                                              | Fixed<br>1 x 1 min repeated 2 times if necessary<br>1 session          | Pain intensity (VAS)                               | Uterine contraction discomfort (5-point verbal scale)<br>Discomfort from treatment (5-point verbal scale)                                                                                                                                                     |
| Olsen et al., 2019 <sup>256</sup>                                                                                                                                                         | C | E  | Dysmenorrhea - primary                               | 16 (16W)  | TENS (HF, brief HI) = 7 (7W)                       | Control (SoC, no TENS, 'delayed intervention) = 9 (9W)                                                                         | PRN<br>1 x 60 seconds repeated as needed                               | Pain intensity (VAS)                               | Analgesic consumption<br>Limitation in physical function (VAS)<br>Discomfort from the treatment                                                                                                                                                               |
| Oncel et al., 2002 <sup>257</sup>                                                                                                                                                         | P | Pr | Minor rib fracture                                   | 100 (41W) | TENS (HF) = 25                                     | Placebo TENS (0mA) + Naproxen NSAID = 25<br>Naproxen NSAID (SoC, no TENS) = 25<br>Placebo pills = 25                           | Fixed<br>2 x 30 mins / day x 3 days<br>6 sessions                      | Pain intensity (VAS)                               | None                                                                                                                                                                                                                                                          |
| Oosterhof et al., 2006 <sup>258</sup><br>Secondary reports<br>Oosterhof et al., 2008 <sup>259</sup> ,<br>Oosterhof et al., 2012 <sup>260</sup> ,<br>Oosterhof et al., 2012 <sup>261</sup> | P | Pr | Chronic pain, various types                          | 163 (97W) | TENS (HF) = 81                                     | Placebo TENS = 82 (0mA)                                                                                                        | PRN<br>x 10 days                                                       | Pain intensity (VAS)                               | TENS satisfaction                                                                                                                                                                                                                                             |
| Ordog, 1987 <sup>262</sup>                                                                                                                                                                | P | Pr | Acute traumatic pain                                 | 100 (NR)  | TENS (NR) = 25                                     | Placebo TENS (0mA) = 25<br>TENS (NR) + acetaminophen with codeine = 25<br>Placebo TENS (0mA) + acetaminophen with codeine = 25 | PRN                                                                    | Pain intensity (VAS)                               | TENS satisfaction<br>Side effects                                                                                                                                                                                                                             |
| Ozkaraoglu et al., 2020 <sup>263</sup>                                                                                                                                                    | P | Pr | Back pain - low non-specific                         | 40 (19W)  | TENS (HF) + ultrasound, hot pack and exercise = 20 | High Intensity Laser Therapy (HILT) + ultrasound, hot pack and exercise = 20                                                   | Fixed<br>1 x 20 mins / day x 5 days a week for a total of 20 sessions. | Pain intensity (VAS)                               | Range of motion<br>Oswestry Disability Questionnaire<br>Beck Depression Inventory                                                                                                                                                                             |
| Ozkul et al., 2015 <sup>264</sup>                                                                                                                                                         | C | Pr | Neuropathic pain in patients with spinal cord injury | 24 (6W)   | TENS (HF) = 12                                     | Visual illusion = 12                                                                                                           | Fixed<br>1 x 30 mins / day x 5 days x 2 weeks<br>10 sessions           | Pain intensity (VAS)                               | Neuropathic sign and symptoms (DNa)<br>McGill pain questionnaire<br>Neuropathic Pain Scale (NPS)<br>Brief Pain Inventory                                                                                                                                      |



08\_OL-TABLE1\_IncludedStudies

|                                          |   |    |                                                |            |                                                     |                                                                                                                            |                                                                     |                                               |                                                                                                                                                                                               |
|------------------------------------------|---|----|------------------------------------------------|------------|-----------------------------------------------------|----------------------------------------------------------------------------------------------------------------------------|---------------------------------------------------------------------|-----------------------------------------------|-----------------------------------------------------------------------------------------------------------------------------------------------------------------------------------------------|
| Oztas and Iyigun, 2019 <sup>265</sup>    | P | Pr | Post-op abdominal surgery                      | 48 (10W)   | TENS (LF-HF) + Tramadol PCA + rescue Pethidine = 16 | Analgesic Medication (tramadol PCA + rescue pethidine (SoC, no TENS) = 16<br>TAES + tramadol PCA + rescue pethidine = 16   | Fixed<br>1 x 30 mins at 2h, 18h, 22h, 42, 46h post-op<br>5 sessions | Pain intensity (VAS)                          | Analgesic consumption (Tramadol - PCA)<br>Nausea severity (VAS)<br>Vomiting (frequency)<br>Antiemetic consumption<br>Pulmonary function tests                                                 |
| Ozturk et al., 2016 <sup>266</sup>       | P | Pr | Post-op cardiac surgery                        | 120 (39W)  | TENS (HF) + morphine (PCA) = 40                     | Placebo TENS + placebo parasternal block (saline) + morphine (PCA) (Control) = 37<br>Placebo TENS + Parasternal block = 38 | PRN<br>60 mins treatments with 60 mins rest as needed               | Pain intensity (VAS)                          | Analgesic consumption (morphine - PCA)<br>Mean arterial pressure, heart rate, and arterial blood gas analysis<br>Duration of extubating, ICU and hospital stay<br>Opioid-related side effects |
| Padma et al., 2000 <sup>267</sup>        | P | Pr | Labour pain                                    | 70 (70W)   | TENS (HF) = 50                                      | Placebo TENS (0mA) = 20                                                                                                    | PRN                                                                 | No primary outcome                            | Pain relief (4 categories)<br>• Subjective assessment (by the patient)<br>• Observer Assessment<br>• Monitoring mother and foetus<br>• Duration of labour APGAR score                         |
| Paker et al., 2006 <sup>268</sup>        | P | Pr | Knee AO                                        | 60 (NR)    | TENS (HF) = NR                                      | Intra-articular hyaluronic acid injection = NR                                                                             | Fixed<br>1 x 20 mins / day x 5 / week x 3 weeks<br>15 sessions      | Pain intensity (5-point scale) from WOMAC     | WOMAC<br>Lequesne Index<br>SF-36                                                                                                                                                              |
| Palmer et al., 2014 <sup>269</sup>       | P | Pr | Osteoarthritis - knee                          | 224 (141W) | TENS (HF) + Exercise + education = 73               | Placebo TENS (0mA) + Exercise + education = 74<br>Exercise + education + exercise (SoC, no TENS control) = 77              | PRN<br>x 6 weeks                                                    | Pain intensity (5-point scale) from WOMAC     | WOMAC<br>Maximum knee extensor torque<br>Patient global assessment of change scale<br>Self-efficacy for exercise                                                                              |
| Pan et al., 2003 <sup>270</sup>          | P | E  | Tendinitis - Chronic calcific of the Shoulders | 60 (39W)   | TENS (HF) + hydrocollator pack = 28 (30 shoulders)  | Extracorporeal shock wave = 32 (33 shoulders)                                                                              | Fixed<br>1 x 20 mins / day x 3 / week x 4 weeks<br>12 sessions      | Pain intensity (VAS)                          | Constant score<br>Manual muscle test (MMT)                                                                                                                                                    |
| Park et al., 2015 <sup>271</sup>         | P | Pr | Post op thyroidectomy - neck pain              | 100 (NR)   | TENS (HF) = 50                                      | Placebo TENS = 50 (0mA)                                                                                                    | Fixed<br>throughout surgery<br>1 session                            | Pain intensity (NRS)<br>• Anterior wound pain | Analgesic consumption post-operative                                                                                                                                                          |
| Patil and Aileni, 2017 <sup>272</sup>    | P | Pr | Temporomandibular disorder                     | 36 (23W)   | TENS (HF) = 18                                      | Exercise home programme = 18                                                                                               | Fixed<br>1 x 30 mins / day x once / week x 4 weeks<br>1 session     | Pain intensity (VAS)                          | Pain free range of motion<br>masticatory muscle tenderness (VAS)                                                                                                                              |
| Peacock et al., 2019 <sup>273</sup>      | P | Pr | Chronic pain - Various                         | 100 (22W)  | TENS (LF, AL-TENS) + SoC = 30                       | Tennant Biomodulator + SoC = 34<br>Acupuncture + SoC = 36                                                                  | PRN<br>2 x 20min / day x 6 weeks<br>12 sessions                     | Pain intensity (VAS, as pain log)             | Million visual analogue scale<br>PTSD checklist – military<br>Center for Epidemiological Studies - depression scale                                                                           |
| Pietrosimone et al., 2009 <sup>274</sup> | P | E  | Tibiofemoral OA                                | 33 (16W)   | TENS (HF) = 10                                      | No treatment (control) = 12<br>Focal joint knee cooling = 11                                                               | Fixed<br>1 x 45 mins<br>1 session                                   | Pain intensity (VAS)                          | WOMAC<br>Quadriceps CAR                                                                                                                                                                       |

08\_OL-TABLE1\_IncludedStudies

|                                                                                                          |   |    |                                                  |            |                                                                        |                                                                                                                                                                                                      |                                                                                    |                                                              |                                                                                                                                   |
|----------------------------------------------------------------------------------------------------------|---|----|--------------------------------------------------|------------|------------------------------------------------------------------------|------------------------------------------------------------------------------------------------------------------------------------------------------------------------------------------------------|------------------------------------------------------------------------------------|--------------------------------------------------------------|-----------------------------------------------------------------------------------------------------------------------------------|
|                                                                                                          |   |    |                                                  |            |                                                                        |                                                                                                                                                                                                      |                                                                                    |                                                              | Peak knee extension torque with maximal voluntary isometric contractions (MVIC)                                                   |
| Pietrosimone et al., 2011 <sup>275</sup><br>Secondary report<br>Pietrosimone et al., 2010 <sup>276</sup> | P | Pr | Tibiofemoral OA                                  | 36 (21W)   | TENS (HF) + Exercises (strengthening) = 12                             | Placebo TENS (Fading) = 12<br>Exercise (strengthening, SoC, no TENS control) = 12                                                                                                                    | PRN<br>>8 hours / day x 4 weeks<br>21 sessions                                     | No primary outcome                                           | WOMAC<br>Quadriceps strength<br>Peak knee extension torque with maximal voluntary isometric contractions                          |
| Pietrosimone et al., 2020 <sup>277</sup>                                                                 | P | Pr | OA, knee [during therapeutic exercise]           | 90 (39W)   | TENS (HF) + Exercises (strengthening) = 30                             | Placebo TENS (0mA) + Exercises<br>Exercises = 30                                                                                                                                                     | PRN during all exercise sessions and during activities of daily living for 4 weeks | No primary outcomes                                          | WOMAC<br>Quadriceps Strength and Voluntary activation<br>Peak knee extension torque with maximal voluntary isometric contractions |
| Pike, 1978 <sup>278</sup>                                                                                | P | Pr | Post-op hip replacement                          | 40 (19W)   | TENS (HF) + medication (pethidine) = 20                                | Medication (pethidine, SoC, no TENS control) = 20                                                                                                                                                    | PRN<br>> 8 hours / day                                                             | No primary outcome                                           | Analgesic consumption (Pethidine)<br>Pain relief (4 categories)<br>Nausea and vomiting (frequency)                                |
| Pitangui et al., 2012 <sup>279</sup>                                                                     | P | Pr | Post episiotomy pain                             | 40 (40W)   | TENS (HF) = 20                                                         | No treatment = 20                                                                                                                                                                                    | Fixed<br>1 x 60 mins<br>1 session                                                  | Pain intensity (NRS)<br>• rest<br>• standing<br>• walking    | McGill Pain Questionnaire<br>TENS-related questions<br>Functional limitations                                                     |
| Pitangui et al., 2014 <sup>280</sup>                                                                     | P | E  | Post episiotomy pain                             | 33 (40W)   | TENS (HF) = 11                                                         | Placebo TENS (0mA) = 10<br>TENS (LF) = 13                                                                                                                                                            | Fixed<br>1 x 30 mins pre-injection<br>1 session                                    | Pain intensity (NRS)<br>• Resting pain<br>• Pain on movement | Treatment satisfaction<br>TENS-related questions                                                                                  |
| Platon et al., 2010 <sup>281</sup>                                                                       | P | Pr | Post-op surgical abortion                        | 200 (200W) | TENS (HF, HI) = 100                                                    | Fentanyl i.v. (SoC, no TENS control) = 100                                                                                                                                                           | Fixed<br>1 x 1 min (repeated if necessary)                                         | Pain intensity (VAS)                                         | Analgesic consumption<br>Nausea (VAS)<br>Time in recovery ward<br>Ramsay sedation score                                           |
| Platon et al., 2018 <sup>282</sup>                                                                       | C | E  | Post-op gynaecologic laparoscopic surgery        | 93 (93W)   | TENS (HF, HI) = 47                                                     | Morphine i.v. (SoC, no TENS control) = 46                                                                                                                                                            | Fixed<br>1 x 1 min (repeated if necessary)                                         | Pain intensity (VAS)                                         | Analgesic consumption (Opioids)<br>Nausea (VAS)<br>Time in recovery ward<br>Ramsay sedation score                                 |
| Prabhakar and Ramteke, 2011 <sup>283</sup>                                                               | P | E  | Radiculopathy - cervical                         | 75 (39W)   | TENS (HF) + Hot fomentation + Exercises, Isometric neck (Group B) = 25 | Hot fomentation + Exercises, Isometric neck (SoC, no TENS control, Group C) = 25<br>Cervical contralateral lateral flexion mobilization + Hot fomentation + Exercises, Isometric neck (Group A) = 25 | Fixed<br>1 x 30 mins<br>1 session                                                  | Pain intensity (VAS)                                         | Northwick<br>Park neck pain questionnaire<br>Neuropathic pain scale,<br>SF-McGill Pain Questionnaire                              |
| Presser et al., 2000 <sup>284</sup>                                                                      | P | E  | Procedural pain - Injection of epidural steroids | 90 (30W)   | TENS (HF) = 30                                                         | Placebo TENS (active, <SDT) + Local anaesthetic = 30<br>Local anaesthetic (SoC, no TENS control) = 30                                                                                                | Fixed<br>Throughout procedure                                                      | Pain intensity (VAS)                                         | None                                                                                                                              |

08\_OL-TABLE1\_IncludedStudies

|                                        |   |    |                                                              |                               |                                                          |                                                                                                                                                                                                              |                                                                                     |                                                                         |                                                                                                                                                                                                     |
|----------------------------------------|---|----|--------------------------------------------------------------|-------------------------------|----------------------------------------------------------|--------------------------------------------------------------------------------------------------------------------------------------------------------------------------------------------------------------|-------------------------------------------------------------------------------------|-------------------------------------------------------------------------|-----------------------------------------------------------------------------------------------------------------------------------------------------------------------------------------------------|
| Rainov et al., 1994 <sup>285</sup>     | P | Pr | Post-op spinal surgery                                       | 234 (121W)                    | TENS (Alternating F) + analgesic medication = 126        | Analgesic medication (SoC, no TENS control) = 108                                                                                                                                                            | Fixed<br>1 x 60 mins every 2 hours<br>? how many days?                              | Pain intensity (VAS)                                                    | Analgesic consumption<br>Pain unpleasantness (VAS)                                                                                                                                                  |
| Rajfur et al., 2017 <sup>286</sup>     | P | Pr | Back pain - chronic low non-specific                         | 127 (73W)                     | TENS (HF) + exercise = 20                                | Exercise (SoC, no TENS control) = 21<br>TENS (LF, acupuncture = like) + exercise = 20<br>High-voltage electrical stimulation) + exercise = 22<br>IFT) + exercise = 22<br>Diadynamic current) + exercise = 22 | Fixed<br>1 x 60 mins / day x 5 / week x 3 weeks<br>15 sessions                      | Pain intensity (VAS)                                                    | Modified Laitinen pain scale<br>The Oswestry questionnaire<br>Roland-Morris Disability Questionnaire<br>Lasègue test<br>Schober test<br>Postural stability                                          |
| Rajpurohit et al., 2010 <sup>287</sup> | P | Pr | Masticatory muscle pain                                      | 60 (24W)                      | TENS (HF) = 30                                           | Microcurrent electrical nerve stimulation (= 30)                                                                                                                                                             | Fixed<br>1 x 20 mins / day x 7 days<br>7 sessions                                   | Pain intensity (VAS)                                                    | Muscle tenderness (algometry)                                                                                                                                                                       |
| Rakel and Frantz, 2003 <sup>288</sup>  | C | E  | Post-op abdominal surgery                                    | 33 (17W)                      | TENS (MF) + analgesics = 33                              | Placebo TENS (0mA) + analgesics = 33<br>Analgesics (SoC, no TENS control) = 33                                                                                                                               | Fixed<br>1 x 15 mins for duration of measurements                                   | Pain intensity (NRS)                                                    | Iowa Gait Test<br>Pulmonary status                                                                                                                                                                  |
| Rakel et al., 2014 <sup>289</sup>      | P | Pr | Post-op knee arthroplasty (control of pain during exercises) | 317 (173W)                    | TENS (HF) + analgesics = 122                             | Placebo TENS (Fading) + analgesics = 123<br>Analgesics (SoC, no TENS control) = 72                                                                                                                           | Fixed<br>1 x 20 mins before exercise, then during exercise x 1 to 2 / day x 6 weeks | Pain intensity (NRS)<br>• At rest<br>• On movement                      | Pain catastrophizing<br>State and trait anxiety<br>Geriatric depression scale<br>Knee injury and osteoarthritis outcome score<br>Quantitative sensory testing<br>Range of motion<br>Gait speed test |
| Ramanathan et al., 2017 <sup>290</sup> | P | Pr | Pot op knee arthroplasty                                     | 116 (30W)                     | TENS (NR) + opioid analgesics + femoral nerve block = 58 | Placebo TENS (Fading to 0mA) + opioid analgesics + femoral nerve block = 58                                                                                                                                  | PRN<br>1 x 2 hours followed by 30 mins rest as needed for 6 weeks                   | Pain intensity (VAS)                                                    | Analgesic consumption<br>Time up and go test<br>Range of motion<br>Knee injury and osteoarthritis outcome score<br>SF-12                                                                            |
| Ramos et al., 2018 <sup>291</sup>      | P | Pr | Back pain - low, lumbar disc herniation                      | 29 (14W)                      | TENS (HF) = 14                                           | Exercises (segmental stabilisation, SoC) = 15                                                                                                                                                                | Fixed<br>1 x 60 mins / day x 2 / week x 8 weeks<br>18 sessions                      | Pain intensity (VAS)                                                    | LM Muscular Fatigue<br>Fatigue Test<br>Transversus abdominis activation capacity<br>Oswestry Disability Index                                                                                       |
| Rani et al., 2020 <sup>292</sup>       | P | Pr | Rotator cuff                                                 | 76 (34W)<br>70 (32W) analysed | TENS (HF) + SoC + rescue meds = 35                       | Exercises (SoC, no TENS control) + rescue meds = 35                                                                                                                                                          | Fixed<br>1 x 20mins / day x 5 days                                                  | Pain intensity (NRS, pain item from Shoulder Pain and Disability Index) | Shoulder Pain and Disability Index                                                                                                                                                                  |
| Ratajczak et al., 2011 <sup>293</sup>  | P | Pr | Back pain – low, desmopathy                                  | 80 (57W)                      | TENS = 40                                                | Diadynamic currents = 40<br>Healthy participants groups (no TENS) = 40                                                                                                                                       | Fixed<br>1 x 30 mins / day x 5 days / week x 2 weeks<br>10 sessions                 | Pain intensity (VAS)                                                    | Functional pain index by Lequesne<br>Range of motion                                                                                                                                                |

08\_OL-TABLE1\_IncludedStudies

|                                             |   |    |                                                                       |           |                                             |                                                                                                                                        |                                                                                                   |                                 |                                                                                                                                      |    |    |    |    |    |    |    |    |    |    |    |    |    |    |    |    |    |    |    |    |    |    |    |    |    |    |    |    |    |    |    |    |
|---------------------------------------------|---|----|-----------------------------------------------------------------------|-----------|---------------------------------------------|----------------------------------------------------------------------------------------------------------------------------------------|---------------------------------------------------------------------------------------------------|---------------------------------|--------------------------------------------------------------------------------------------------------------------------------------|----|----|----|----|----|----|----|----|----|----|----|----|----|----|----|----|----|----|----|----|----|----|----|----|----|----|----|----|----|----|----|----|
| 1                                           | 2 | 3  | 4                                                                     | 5         | 6                                           | 7                                                                                                                                      | 8                                                                                                 | 9                               | 10                                                                                                                                   | 11 | 12 | 13 | 14 | 15 | 16 | 17 | 18 | 19 | 20 | 21 | 22 | 23 | 24 | 25 | 26 | 27 | 28 | 29 | 30 | 31 | 32 | 33 | 34 | 35 | 36 | 37 | 38 | 39 | 40 | 41 | 42 |
| Rawat et al., 1991 <sup>294</sup>           | P | Pr | Procedural pain - during biliary extracorporeal shockwave lithotripsy | 100       | TENS (MF, on back) = 25                     | Placebo TENS (0mA, on back) = 25<br>TENS (MF, back and acupoints on leg) = 25<br>Placebo TENS (0mA, on back and acupoints on leg) = 25 | PRN throughout procedure                                                                          | Pain intensity (5-point scale)  | Analgesic consumption                                                                                                                |    |    |    |    |    |    |    |    |    |    |    |    |    |    |    |    |    |    |    |    |    |    |    |    |    |    |    |    |    |    |    |    |
| Renovato França et al., 2019 <sup>295</sup> | P | Pr | Radiculopathy – lumbar disc herniation                                | 40 (25W)  | TENS = 20                                   | Exercises (Motor control training, SoC) = 20                                                                                           | Fixed 2 x 60 mins / week x 8 weeks<br>16 session                                                  | Pain intensity (VAS)            | McGill Pain Questionnaire<br>Oswestry Disability Index<br>Transversus Abdominis Activation Capacity                                  |    |    |    |    |    |    |    |    |    |    |    |    |    |    |    |    |    |    |    |    |    |    |    |    |    |    |    |    |    |    |    |    |
| Reuss et al., 1988 <sup>296</sup>           | P | Pr | Post-op cholecystectomy                                               | 64 (50W)  | TENS (HF) = 30                              | No treatment (+ meperidine on demand) = 34                                                                                             | PRN                                                                                               | No primary outcomes             | Analgesic consumption<br>Complications                                                                                               |    |    |    |    |    |    |    |    |    |    |    |    |    |    |    |    |    |    |    |    |    |    |    |    |    |    |    |    |    |    |    |    |
| Revadkar and Bhojwani, 2019 <sup>297</sup>  | P | Pr | Dysmenorrhea                                                          | 30 (30W)  | TENS (HF) + rescue medication = 15          | IFT + rescue medication = 15                                                                                                           | Fixed 1 x 20mins<br>1 session                                                                     | Pain intensity (NRS)            | None                                                                                                                                 |    |    |    |    |    |    |    |    |    |    |    |    |    |    |    |    |    |    |    |    |    |    |    |    |    |    |    |    |    |    |    |    |
| Ringel and Taubert, 1991 <sup>298</sup>     | P | Pr | Migraine                                                              | 57 (48W)  | TENS (NR) = 31                              | Ergocomb (prophylactic buccal tablets for migraine) (SoC, no TENS) = 26                                                                | PRN >1 x 30 mins / day as needed for 3 months                                                     | Pain intensity (4-point scale)  | Number of headache days                                                                                                              |    |    |    |    |    |    |    |    |    |    |    |    |    |    |    |    |    |    |    |    |    |    |    |    |    |    |    |    |    |    |    |    |
| Robb et al., 2007 <sup>299</sup>            | C | E  | Chronic pain associated with breast cancer treatment                  | 41 (411W) | TENS (HF) = 41                              | Placebo TENS (0mA) = 41<br>Transcutaneous spinal electroanalgesia = 41                                                                 | PRN >10-30 mins / day x 3 weeks                                                                   | Pain intensity (NRS) – from BPI | Analgesic consumption<br>BPI<br>Hospital Anxiety and Depression (HAD) Scale<br>Range of motion<br>Patient satisfaction questionnaire |    |    |    |    |    |    |    |    |    |    |    |    |    |    |    |    |    |    |    |    |    |    |    |    |    |    |    |    |    |    |    |    |
| Robinson et al., 2001 <sup>300</sup>        | P | E  | Procedural pain – colonoscopy                                         | 33 (NR)   | TENS (various F) + standard medication = 10 | Placebo TENS (0mA) + standard medication = 13<br>Standard medication (SoC, no TENS control) = 10                                       | Fixed 1 x 5mins pre-procedure, 1x 5 mins during procedure, 1 x 5 mins post procedure<br>1 session | Pain intensity (NRS)            | Post-procedure evaluation questionnaire                                                                                              |    |    |    |    |    |    |    |    |    |    |    |    |    |    |    |    |    |    |    |    |    |    |    |    |    |    |    |    |    |    |    |    |
| Roche et al., 1985 <sup>301</sup>           | P | Pr | Haemophilia                                                           | 36 (NR)   | TENS (HF) = 28                              | Placebo TENS (0mA) = 8                                                                                                                 | PRN 1 x 25 mins continuous from recovery room for 5 days as needed                                | Pain intensity (NRS)            | McGill Pain Questionnaire                                                                                                            |    |    |    |    |    |    |    |    |    |    |    |    |    |    |    |    |    |    |    |    |    |    |    |    |    |    |    |    |    |    |    |    |
| Rooney et al., 1983 <sup>302</sup>          | P | E  | Post-op – thoracotomy                                                 | 44 (17W)  | TENS (HF) = 22                              | Placebo TENS (0mA) = 22                                                                                                                | Fixed 1 x 25 mins<br>1 session                                                                    | No primary outcome              | Analgesic consumption – (Narcotic)                                                                                                   |    |    |    |    |    |    |    |    |    |    |    |    |    |    |    |    |    |    |    |    |    |    |    |    |    |    |    |    |    |    |    |    |
| Rosenberg et al., 1978 <sup>303</sup>       | P | Pr | Post-op cholecystectomy                                               | 12 (NR)   | TENS (HF) + analgesics = 6                  | Analgesics (SoC, no TENS control) = 6                                                                                                  | PRN 3 days as needed                                                                              | No primary outcome              | Analgesic consumption<br>Pulmonary function                                                                                          |    |    |    |    |    |    |    |    |    |    |    |    |    |    |    |    |    |    |    |    |    |    |    |    |    |    |    |    |    |    |    |    |
| Rutgers et al., 1988 <sup>304</sup>         | P | Pr | Postherpetic neuralgia                                                | 23 (13W)  | TENS (HF) = 13                              | Acupuncture = 10                                                                                                                       | PRN 3 x 30 mins / week x 1 week then as needed for 6 weeks                                        | Pain intensity (NRS)            | None                                                                                                                                 |    |    |    |    |    |    |    |    |    |    |    |    |    |    |    |    |    |    |    |    |    |    |    |    |    |    |    |    |    |    |    |    |
| Sadala et al., 2018 <sup>305</sup>          | P | E  | Procedural pain - during carboxytherapy                               | 84 (84W)  | TENS (HF) = 28                              | Placebo TENS (Fading) – 28<br>No treatment (Control) = 28                                                                              | Fixed 1 min / puncture<br>1 session                                                               | Pain intensity (VAS)            | None                                                                                                                                 |    |    |    |    |    |    |    |    |    |    |    |    |    |    |    |    |    |    |    |    |    |    |    |    |    |    |    |    |    |    |    |    |
| Sahin et al., 2011 <sup>306</sup>           | P | E  | Cervical myofascial pain syndrome                                     | 80 (40W)  | TENS (HF, conventional) = 20                | Placebo TENS (Fading) = 20<br>TENS (LF, acupuncture = like) = 20                                                                       | Fixed 1 x 30min/day x 3 / week                                                                    | Pain intensity (VAS)            | SF-36<br>Bodily pain subscale                                                                                                        |    |    |    |    |    |    |    |    |    |    |    |    |    |    |    |    |    |    |    |    |    |    |    |    |    |    |    |    |    |    |    |    |

08\_OL-TABLE1\_IncludedStudies

|                                              |   |    |                                                             |            |                                                                                 |                                                                                                          |                                                                   |                                                                               |                                                                                                                              |
|----------------------------------------------|---|----|-------------------------------------------------------------|------------|---------------------------------------------------------------------------------|----------------------------------------------------------------------------------------------------------|-------------------------------------------------------------------|-------------------------------------------------------------------------------|------------------------------------------------------------------------------------------------------------------------------|
|                                              |   |    |                                                             |            |                                                                                 | TENS (LF, burst) = 20                                                                                    | ?? no. weeks?<br>1 session                                        |                                                                               |                                                                                                                              |
| Samadzadeh et al., 2017 <sup>307</sup>       | P | Pr | Labour pain                                                 | 120 (120W) | TENS (HF, continuous, LF, burst) + meperidine as rescue analgesia = 40          | Entonox + meperidine as rescue analgesia = 40<br>TENS + Entonox + meperidine as rescue analgesia = 40    | PRN<br>During labour                                              | Pain intensity (VAS)                                                          | Analgesic consumption                                                                                                        |
| Sangtong et al., 2019 <sup>308</sup>         | P | Pr | Osteoarthritis - knee                                       | 148 (135W) | TENS (HF) + US = 64                                                             | US = 68                                                                                                  | Fixed<br>1 x 10 mins / day x 5 days x 2 weeks<br>10 session       | Pain intensity (NRS)<br>• At rest<br>• On movement (walking, climbing stairs) | 6-min walk test<br>Patient global assessment<br>Adverse events                                                               |
| Santamato et al., 2013 <sup>309</sup>        | P | Pr | Botulinum toxin type A injection for post-stroke spasticity | 32 (18W)   | TENS (LF) = 16                                                                  | Shock wave therapy = 16                                                                                  | Fixed<br>1 x 30 mins / day x 2 / day x 5 days<br>10 sessions      | Pain intensity (VAS)                                                          | Spasticity scale<br>Spasm scale                                                                                              |
| Santana et al., 2016 <sup>310</sup>          | P | Pr | Labour pain                                                 | 46 (46W)   | TENS (HF) + routine obstetric care = 23                                         | Routine obstetric care (SoC, no TENS control) = 23                                                       | Fixed<br>1 x 30 mins / day x 5 days x 2 weeks<br>10 sessions      | Pain intensity (VAS)                                                          | Time to analgesic requirement<br>Pain location                                                                               |
| Saranya et al., 2019 <sup>311</sup>          | P | Pr | Muscle pain – Temporomandibular Masticatory Muscle Pain     | 60 (42W)   | TENS (HF) + jaw exercises + hot fomentation = 30                                | Microcurrent electrical stimulation + jaw exercises + hot fomentation = 30                               | Fixed<br>1 x 20min / day x 5 days<br>5 sessions                   | Pain intensity (VAS)                                                          | Mouth opening and functional assessment                                                                                      |
| Sayilir and Yildizgoren, 2017 <sup>312</sup> | P | Pr | Back pain - chronic low non-specific                        | 55 (32W)   | TENS (HF) = 26                                                                  | Diadynamic currents = 29                                                                                 | Fixed<br>1 x 30 mins / day x 5 days/week x 2 weeks<br>10 sessions | Pain intensity (VAS)<br>• Rest<br>• On movement                               | Roland Morris Disability Questionnaire<br>Oswestry Disability Index (ODI)<br>Hand finger floor distance (HFFD)               |
| Seo et al., 2013 <sup>313</sup>              | P | Pr | Chronic myofascial pain syndrome                            | 76 (64W)   | TENS (LF, burst) + Botulinum toxin A = 38                                       | Botulinum toxin A + electrical stimulation with muscle contraction = 38                                  | Fixed<br>1 x 30 mins / day x 3 days<br>3 sessions                 | Pain intensity (VAS)                                                          | Neck Pain and Disability Scale (NPAD)<br>Global Assessment of Improvement Scale (GAS)<br>Pressure algometry (pain threshold) |
| Serry et al., 2016 <sup>314</sup>            | P | Pr | Peripheral diabetic neuropathy                              | 60 (32W)   | TENS (HF) + pharmacological therapy = 20                                        | Pharmacological therapy (SoC, no TENS control) = 20<br>Exercise (aerobic) + pharmacological therapy = 20 | Fixed<br>1 x 30 mins / day x 3 / week x 8 weeks<br>24 sessions    | Pain intensity (VAS)                                                          | Nerve conduction studies                                                                                                     |
| Sezen et al., 2017 <sup>315</sup>            | P | Pr | Post-op thoracotomy                                         | 87 (25W)   | TENS (HF) + Analgesics (diclofenac i.m., tramadol i.v. + paracetamol i.v.) = 43 | Placebo TENS + Analgesics (diclofenac i.m., tramadol i.v. + paracetamol i.v.) = 44 (0mA)                 | PRN<br>During labour at 8 h intervals                             | Pain intensity (VAS)                                                          | Analgesic consumption<br>Pulse rate<br>Blood pressure<br>Saturation<br>Complication                                          |
| Shahoei et al., 2017 <sup>316</sup>          | P | Pr | Labour pain                                                 | 90 (90W)   | TENS (PRN) = 30                                                                 | Placebo TENS = 30 (0mA)<br>Routine care (SoC, no TENS control) = 30                                      | PRN<br>During labour                                              | Pain intensity (VAS)                                                          |                                                                                                                              |

08\_OL-TABLE1\_IncludedStudies

|                                            |   |    |                                                                       |          |                                                   |                                                                                                         |                                                                                                              |                                                                           |                                                                                                                                                                                                |    |    |    |    |    |    |    |    |    |    |    |    |    |    |    |    |    |    |    |    |    |    |    |    |    |    |    |    |    |    |    |    |    |    |    |    |
|--------------------------------------------|---|----|-----------------------------------------------------------------------|----------|---------------------------------------------------|---------------------------------------------------------------------------------------------------------|--------------------------------------------------------------------------------------------------------------|---------------------------------------------------------------------------|------------------------------------------------------------------------------------------------------------------------------------------------------------------------------------------------|----|----|----|----|----|----|----|----|----|----|----|----|----|----|----|----|----|----|----|----|----|----|----|----|----|----|----|----|----|----|----|----|----|----|----|----|
| 1                                          | 2 | 3  | 4                                                                     | 5        | 6                                                 | 7                                                                                                       | 8                                                                                                            | 9                                                                         | 10                                                                                                                                                                                             | 11 | 12 | 13 | 14 | 15 | 16 | 17 | 18 | 19 | 20 | 21 | 22 | 23 | 24 | 25 | 26 | 27 | 28 | 29 | 30 | 31 | 32 | 33 | 34 | 35 | 36 | 37 | 38 | 39 | 40 | 41 | 42 | 43 | 44 | 45 | 46 |
| Shehab and Adham, 2000 <sup>317</sup>      | P | Pr | Shoulder pain                                                         | 50 (50W) | TENS (HF) + cold pack + stretching exercises = 26 | Ultrasound therapy + cold pack + stretching exercises = 24                                              | Fixed<br>1 x 30 mins / day x 3 to 5 / week x 3 to 5 weeks<br>13 sessions                                     | Pain intensity (VAS)                                                      | Range of motion                                                                                                                                                                                |    |    |    |    |    |    |    |    |    |    |    |    |    |    |    |    |    |    |    |    |    |    |    |    |    |    |    |    |    |    |    |    |    |    |    |    |
| Sherry et al., 2001 <sup>318</sup>         | P | Pr | Back pain - chronic low non-specific                                  | 44 (21W) | TENS (NR) + analgesics if needed = 22             | Vertebral axial decompression = 22                                                                      | Fixed<br>1 x 10 mins / day x 20 days then 1 x 10 mins / week x 4 weeks<br>24 sessions                        | Pain intensity (VAS)                                                      | Disability (4-point scale)                                                                                                                                                                     |    |    |    |    |    |    |    |    |    |    |    |    |    |    |    |    |    |    |    |    |    |    |    |    |    |    |    |    |    |    |    |    |    |    |    |    |
| Shimoji et al., 2007 <sup>319</sup>        | P | E  | Back pain - chronic low non-specific                                  | 28 (24W) | TENS (HF) = 9                                     | Placebo TENS (0mA) = 8<br>TENS (Bidirectional modulated sine waves) = 11                                | Fixed<br>1 x 15 mins<br>1 session                                                                            | Pain intensity NRS                                                        | None                                                                                                                                                                                           |    |    |    |    |    |    |    |    |    |    |    |    |    |    |    |    |    |    |    |    |    |    |    |    |    |    |    |    |    |    |    |    |    |    |    |    |
| Shimoura et al., 2019 <sup>320</sup>       | P | E  | Osteoarthritis - knee                                                 | 50 (35W) | TENS (MF) = 25                                    | Placebo TENS = 25 (0mA)                                                                                 | Fixed<br>Details NR<br>1 session                                                                             | Pain intensity (VAS)<br>• on movement                                     | Climb test<br>Timed Up and Go (TUG)<br>6-minute walk test (6MWT)<br>Knee extensor strengths<br>2-step test<br>Stand-up test in the locomotive syndrome risk test.                              |    |    |    |    |    |    |    |    |    |    |    |    |    |    |    |    |    |    |    |    |    |    |    |    |    |    |    |    |    |    |    |    |    |    |    |    |
| Shoukry and Al-Ansary, 2019 <sup>321</sup> | P | Pr | Procedural pain - during Extracorporeal Shock-Wave Lithotripsy (ESWL) | 60 (26W) | TENS (HF) + IV fentanyl = 30                      | IV fentanyl = 30                                                                                        | Fixed<br>1 treatment<br>Duration not reported but less than 40 mins                                          | Pain intensity (VAS)                                                      | Analgesic consumption<br>Modified Post-Anaesthetic Discharge Scoring System<br>adverse effect during or after the procedure<br>Discharge time                                                  |    |    |    |    |    |    |    |    |    |    |    |    |    |    |    |    |    |    |    |    |    |    |    |    |    |    |    |    |    |    |    |    |    |    |    |    |
| Siemens et al., 2020 <sup>322</sup>        | C | Pr | Cancer pain - advanced cancer, inpatients                             | 25 (12W) | TENS (HF) + medication = 20                       | Placebo TENS (0mA) + medication = 20                                                                    | PRN<br>For 1 day<br>Mean $\pm$ SD = 9.1 $\pm$ 7.5h for TENS and 7 $\pm$ 5.6 for placebo<br>24 h washout<br>. | Pain intensity (NRS)                                                      | Analgesic consumption<br>Brief Pain Inventory (BPI)<br>Edmonton Classification System for Cancer Pain Douleur Neuropathique en 4 Questions<br>7-point verbal pain rating scale<br>EORTC QLQC30 |    |    |    |    |    |    |    |    |    |    |    |    |    |    |    |    |    |    |    |    |    |    |    |    |    |    |    |    |    |    |    |    |    |    |    |    |
| Sikiru et al., 2008 <sup>323</sup>         | P | Pr | Pelvic pain, prostatitis - chronic                                    | 24 (24M) | TENS (HF) + antibiotics = 8                       | Placebo pill + antibiotics = 8<br>Analgesics (Ibuprofen 400mg) + antibiotics (SoC, no TENS control) = 8 | Fixed<br>1 x 20 mins / day x 5 / week x 4 weeks<br>20 sessions                                               | Pain intensity (NRS)                                                      | NIH chronic prostatitis symptom index questionnaire (pain domain)                                                                                                                              |    |    |    |    |    |    |    |    |    |    |    |    |    |    |    |    |    |    |    |    |    |    |    |    |    |    |    |    |    |    |    |    |    |    |    |    |
| Silva et al., 2012 <sup>324</sup>          | P | Pr | Post-op cholecystectomy                                               | 42 (39W) | TENS (HF) + analgesics (Tramadol + Dipyron) = 21  | Placebo TENS (0mA) + analgesics (Tramadol + Dipyron) = 21                                               | PRN<br>1 x 30 mins / session as needed                                                                       | Pain intensity (VAS, verbal NRS)                                          | Occurrence of nausea and emesis                                                                                                                                                                |    |    |    |    |    |    |    |    |    |    |    |    |    |    |    |    |    |    |    |    |    |    |    |    |    |    |    |    |    |    |    |    |    |    |    |    |
| Silva et al., 2014 <sup>325</sup>          | P | E  | Post-mastectomy pain syndrome – chronic, intercostobrachial           | 18 (18W) | TENS (LF, burst) = 9                              | TENS (MF, acupuncture-like,) = 9                                                                        | Fixed<br>1 x 10-15 mins<br>1 session                                                                         | Pain intensity (VAS)                                                      | Electroencephalography (EEG) measures                                                                                                                                                          |    |    |    |    |    |    |    |    |    |    |    |    |    |    |    |    |    |    |    |    |    |    |    |    |    |    |    |    |    |    |    |    |    |    |    |    |
| Sim, 1991 <sup>326</sup>                   | P | Pr | Post-op cholecystectomy                                               | 30 (27W) | TENS (HF) + analgesics (Papaveretum) = 15         | Papaveretum, i.m. on demand (SoC, no TENS control) = 15                                                 | PRN<br>1 x 60 mins / day? x 5 days<br>5 sessions                                                             | Pain intensity (VAS)<br>• Resting pain<br>• Coughing<br>• Deep breathing. | Analgesic consumption<br>Spirometer function                                                                                                                                                   |    |    |    |    |    |    |    |    |    |    |    |    |    |    |    |    |    |    |    |    |    |    |    |    |    |    |    |    |    |    |    |    |    |    |    |    |

08\_OL-TABLE1\_IncludedStudies

|    |                                        |   |    |                                              |            |                                                           |                                                                                                                                    |                                                                                                        |                                          |                                                                                                                               |
|----|----------------------------------------|---|----|----------------------------------------------|------------|-----------------------------------------------------------|------------------------------------------------------------------------------------------------------------------------------------|--------------------------------------------------------------------------------------------------------|------------------------------------------|-------------------------------------------------------------------------------------------------------------------------------|
| 1  |                                        |   |    |                                              |            |                                                           |                                                                                                                                    |                                                                                                        |                                          |                                                                                                                               |
| 2  | Siqueira et al., 2019 <sup>327</sup>   | P | Pr | Musculoskeletal pain – behavioural dysphonia | 27 (27W)   | TENS (LF) + vocal training                                | Placebo TENS (0mA) + vocal therapy                                                                                                 | Fixed<br>1 x 20mins / day<br>12 sessions                                                               | Pain intensity (VAS)                     | Self-perception of musculoskeletal pain frequency (4-point Likert scale) and intensity<br>Pressure algometry - Pain Threshold |
| 3  |                                        |   |    |                                              |            |                                                           |                                                                                                                                    |                                                                                                        |                                          |                                                                                                                               |
| 4  |                                        |   |    |                                              |            |                                                           |                                                                                                                                    |                                                                                                        |                                          |                                                                                                                               |
| 5  |                                        |   |    |                                              |            |                                                           |                                                                                                                                    |                                                                                                        |                                          |                                                                                                                               |
| 6  |                                        |   |    |                                              |            |                                                           |                                                                                                                                    |                                                                                                        |                                          |                                                                                                                               |
| 7  | Sloan et al., 1986 <sup>328</sup>      | P | Pr | Rib fracture                                 | 24 (NR)    | TENS (HF) + paracetamol + dihydrocodeine as required = 12 | Naproxen + paracetamol + dihydrocodeine as required (SoC, no TENS control) = 12                                                    | PRN<br>2 post op days                                                                                  | Pain intensity (VAS)                     | Pain relief (VAS)<br>Arterial blood assays<br>Peak expiratory flow rate<br>Treatment effectiveness (VAS)                      |
| 8  |                                        |   |    |                                              |            |                                                           |                                                                                                                                    |                                                                                                        |                                          |                                                                                                                               |
| 9  |                                        |   |    |                                              |            |                                                           |                                                                                                                                    |                                                                                                        |                                          |                                                                                                                               |
| 10 | Smania et al., 2005 <sup>329</sup>     | P | Pr | Myofascial pain syndrome                     | 53 (36W)   | TENS (HF) = 18                                            | Placebo (ultrasound turned off) = 18<br>Repetitive magnetic stimulation = 17                                                       | Fixed<br>1 x 20 mins / day x 5 days / week x 2 weeks<br>10 sessions                                    | Pain intensity (Pain and disability VAS) | Pressure pain threshold (algometry)<br>Range of motion                                                                        |
| 11 |                                        |   |    |                                              |            |                                                           |                                                                                                                                    |                                                                                                        |                                          |                                                                                                                               |
| 12 |                                        |   |    |                                              |            |                                                           |                                                                                                                                    |                                                                                                        |                                          |                                                                                                                               |
| 13 |                                        |   |    |                                              |            |                                                           |                                                                                                                                    |                                                                                                        |                                          |                                                                                                                               |
| 14 | Smedley et al., 1988 <sup>330</sup>    | P | Pr | Post-op inguinal herniorrhaphy               | 62 (62W)   | TENS (HF) + Omnopon = 34                                  | Placebo TENS (0mA) + Omnopon = 28                                                                                                  | PRN<br>2 days continuously post op<br>Unclear                                                          | Pain intensity (VAS)                     | Analgesic consumption<br>Expiratory flow                                                                                      |
| 15 |                                        |   |    |                                              |            |                                                           |                                                                                                                                    |                                                                                                        |                                          |                                                                                                                               |
| 16 |                                        |   |    |                                              |            |                                                           |                                                                                                                                    |                                                                                                        |                                          |                                                                                                                               |
| 17 | Smith et al., 1983 <sup>331</sup>      | P | Pr | Osteoarthritis - knee                        | 30 (20W)   | TENS (HF) = 15                                            | Placebo TENS (0mA) = 15                                                                                                            | Fixed<br>1 x 20 mins / day x 8 occasions over 4 weeks<br>8 sessions                                    | Pain intensity (VAS)                     | Analgesic consumption<br>Pain chart<br>Sleep disturbance (VAS)                                                                |
| 18 |                                        |   |    |                                              |            |                                                           |                                                                                                                                    |                                                                                                        |                                          |                                                                                                                               |
| 19 |                                        |   |    |                                              |            |                                                           |                                                                                                                                    |                                                                                                        |                                          |                                                                                                                               |
| 20 |                                        |   |    |                                              |            |                                                           |                                                                                                                                    |                                                                                                        |                                          |                                                                                                                               |
| 21 | Smith et al., 1986 <sup>332</sup>      | P | Pr | Post-caesarean pain                          | 18 (18W)   | TENS (HF) + analgesics = 9                                | Placebo TENS (0mA) + analgesics = 9                                                                                                | PRN<br>Continuous with 15 mins rest for 3 days post up                                                 | Pain intensity (5-point scale)           | Analgesic consumption<br>McGill Pain Questionnaire                                                                            |
| 22 |                                        |   |    |                                              |            |                                                           |                                                                                                                                    |                                                                                                        |                                          |                                                                                                                               |
| 23 |                                        |   |    |                                              |            |                                                           |                                                                                                                                    |                                                                                                        |                                          |                                                                                                                               |
| 24 | Sodipo et al., 1980 <sup>333</sup>     | P | Pr | Post-op                                      | 30 (NR)    | TENS (NR) + analgesics = 15                               | Narcotic medication (SoC, no TENS control) = 15                                                                                    | PRN<br>2 days post op                                                                                  | No primary outcome                       | Analgesic consumption<br>Pulmonary function                                                                                   |
| 25 |                                        |   |    |                                              |            |                                                           |                                                                                                                                    |                                                                                                        |                                          |                                                                                                                               |
| 26 | Solak et al., 2007 <sup>334</sup>      | P | Pr | Post-op thoracotomy                          | 40 (8W)    | TENS (LF) + (no morphine PCA) = 20                        | Morphine (PCA) (SoC, no TENS control) = 20                                                                                         | Fixed<br>1 x 30 mins / day ? x 10 days<br>10 sessions                                                  | Pain intensity (VAS)                     | Analgesic consumption (Morphine - PCA)<br>Prince Henry pain scale<br>Pulmonary function                                       |
| 27 |                                        |   |    |                                              |            |                                                           |                                                                                                                                    |                                                                                                        |                                          |                                                                                                                               |
| 28 |                                        |   |    |                                              |            |                                                           |                                                                                                                                    |                                                                                                        |                                          |                                                                                                                               |
| 29 | Solak et al., 2009 <sup>335</sup>      | P | Pr | Post-op coronary bypass grafting             | 100 (13W)  | TENS (HF, continuously) + morphine (PCA) = 25             | Placebo TENS + morphine (PCA) = 25<br>Morphine (PCA)(SoC, no TENS control) = 25<br>TENS (HF, intermittently) + morphine (PCA) = 25 | PRN<br>continuously one day<br>Continuously = on for 24h without break Intermittently = 1h on 1 hr off | Pain intensity (VAS)                     | Analgesic consumption<br>Duration operation, extubation, hospital stay<br>Oximetry<br>Respiratory function                    |
| 30 |                                        |   |    |                                              |            |                                                           |                                                                                                                                    |                                                                                                        |                                          |                                                                                                                               |
| 31 |                                        |   |    |                                              |            |                                                           |                                                                                                                                    |                                                                                                        |                                          |                                                                                                                               |
| 32 |                                        |   |    |                                              |            |                                                           |                                                                                                                                    |                                                                                                        |                                          |                                                                                                                               |
| 33 |                                        |   |    |                                              |            |                                                           |                                                                                                                                    |                                                                                                        |                                          |                                                                                                                               |
| 34 |                                        |   |    |                                              |            |                                                           |                                                                                                                                    |                                                                                                        |                                          |                                                                                                                               |
| 35 | Sonde et al., 1998 <sup>336</sup>      | P | Pr | Post stroke – shoulder pain                  | 44 (17W)   | TENS (LF) + Physiotherapy (usual care) = 26               | Physiotherapy (SoC, no TENS control) = 18                                                                                          | Fixed<br>1 x 60 mins / day x 5 days / week x 12 weeks<br>60 sessions                                   | Pain intensity (VAS)                     | Fugl-Meyer Ashworth scale<br>Autonomy in activities of daily living                                                           |
| 36 |                                        |   |    |                                              |            |                                                           |                                                                                                                                    |                                                                                                        |                                          |                                                                                                                               |
| 37 |                                        |   |    |                                              |            |                                                           |                                                                                                                                    |                                                                                                        |                                          |                                                                                                                               |
| 38 |                                        |   |    |                                              |            |                                                           |                                                                                                                                    |                                                                                                        |                                          |                                                                                                                               |
| 39 | Stepanovic et al., 2015 <sup>337</sup> | P | Pr | Post-herpetic neuralgia                      | 222 (133W) | TENS (HF) = 36                                            | Analgesics (SoC, no TENS control) = 38<br>Antiviral agents = 71<br>TENS + antiviral agents = 77                                    | Fixed<br>1 x 30 mins / day<br>10 to 15 sessions                                                        | Pain intensity (VAS)                     | Analgesic consumption<br>Allodynia, hyperalgesia or paraesthesia                                                              |
| 40 |                                        |   |    |                                              |            |                                                           |                                                                                                                                    |                                                                                                        |                                          |                                                                                                                               |
| 41 |                                        |   |    |                                              |            |                                                           |                                                                                                                                    |                                                                                                        |                                          |                                                                                                                               |
| 42 | Stephoe and Bo, 1984 <sup>338</sup>    | P | Pr | Labour pain                                  | 25 (25W)   | TENS (HF + LF) = 12                                       | Placebo TENS (0mA) = 13                                                                                                            | PRN                                                                                                    | Pain intensity                           | Analgesic consumption                                                                                                         |



08\_OL-TABLE1\_IncludedStudies

|                                            |   |    |                                                      |            |                                                   |                                                                                                                                                                                                                           |                                                                   |                                                    |                                                                                                                                                                                                    |
|--------------------------------------------|---|----|------------------------------------------------------|------------|---------------------------------------------------|---------------------------------------------------------------------------------------------------------------------------------------------------------------------------------------------------------------------------|-------------------------------------------------------------------|----------------------------------------------------|----------------------------------------------------------------------------------------------------------------------------------------------------------------------------------------------------|
|                                            |   |    |                                                      |            |                                                   |                                                                                                                                                                                                                           | 1 x 30 mins?                                                      |                                                    |                                                                                                                                                                                                    |
| Stratton and Smith, 1980 <sup>339</sup>    | P | Pr | Plantar fasciitis                                    | 26 (NR)    | TENS (HF) + exercise (stretching) + orthoses = 13 | Exercise (stretching) + orthoses (SoC, no TENS control) = 13                                                                                                                                                              | Fixed<br>1 x 20 mins / day x 7 days x 4 weeks<br>28 sessions      | Pain intensity (VAS)                               | Activities of daily living subscale of Foot and Ankle Ability Measure                                                                                                                              |
| Stubbing and Jellicoe, 1988 <sup>340</sup> | P | Pr | Post-op thoracotomy                                  | 40 (12W)   | TENS (HF) + opioids (Papaveretum, i.v.) = 20      | Papaveretum (i.v.) (SoC, no TENS control) = 20                                                                                                                                                                            | PRN for 48 hours                                                  | Pain intensity (5-categories)                      | Analgesic consumption<br>Time to transfer to oral analgesia<br>Peak expiratory flow rate                                                                                                           |
| Suh et al., 2015 <sup>341</sup>            | P | Pr | Musculoskeletal pain - (various types, work-related) | 47 (36W)   | TENS (HF) = 24                                    | Placebo TENS = 23 (0mA)                                                                                                                                                                                                   | Fixed<br>1 x 60 mins<br>1 session                                 | Pain intensity (VAS)<br>• resting<br>• on movement | Pressure pain threshold (algometry)<br>Range of motion<br>Fatigue (VAS)<br>• Resting pain<br>• Pain on movement                                                                                    |
| Talbot et al., 2020 <sup>342</sup>         | P | Pr | Knee pain, Patellofemoral pain syndrome              | 130 (29W)  | TENS (HF) + exercise (home programme) = 33        | Exercise (home programme) alone (SoC) = 34<br><br>Neuromuscular electrical stimulation + exercise (home programme) = 33<br><br>Alternating Neuromuscular electrical stimulation and TENS + exercise (home programme) = 30 | Fixed<br>1x 20 mins / day<br>1 x every 2 days<br>X 9 weeks        | Pain intensity (VAS)                               | Lower Extremity Isometric Strength<br>30-Second Chair Stand Test (30-SCST)<br>Timed Stair Climb Test (SCT)<br>Forward Step-Down Test<br>Six-Minute Timed Walk Test (6-MWT)                         |
| Tantawy et al., 2018 <sup>343</sup>        | P | Pr | Chronic orchialgia                                   | 71 (0W)    | TENS (HF) + analgesic medication = 36             | Analgesic medication (SoC, no TENS control) = 35                                                                                                                                                                          | Fixed<br>1 x 30 mins / day x 5 / week x 4 weeks<br>20 sessions    | Pain intensity (VAS)                               | Pin prick<br>Quality of life                                                                                                                                                                       |
| Taylor et al., 1981 <sup>344</sup>         | C | E  | Osteoarthritis - knee                                | 10 (9W)    | TENS (Freq. PRN) = 10                             | Placebo TENS (0mA) = 10                                                                                                                                                                                                   | PRN<br>1 x 30 to 60 mins or continuously / day 2 weeks at home    | Pain intensity (5-point category scale)            | Analgesic consumption (5 categories)<br>Ambulation (5 categories)                                                                                                                                  |
| Taylor et al., 1983 <sup>345</sup>         | P | Pr | Post op abdominal surgery                            | 77 (45W)   | TENS (HF) + analgesics = 30                       | Placebo TENS (0mA) + analgesics = 22<br>Analgesic medication (SoC, no TENS control) = 25                                                                                                                                  | Fixed<br>1 x 60 mins x 4 / day (q4h) x 3 post days<br>12 sessions | Pain intensity (NRS)                               | Analgesic consumption (Morphine)<br>Physiological depression<br>Patient ambulation<br>Fluid intake                                                                                                 |
| Thakur and Patidar, 2004 <sup>346</sup>    | P | Pr | Labour pain                                          | 300 (300W) | TENS (HF) = 100                                   | No treatment = 100<br>Tramadol (100mg) = 100                                                                                                                                                                              | PRN                                                               | No primary outcome                                 | Pain relief (5 categories)<br>Time taken for onset of analgesic action<br>Duration of analgesia                                                                                                    |
| Thomas et al., 1988 <sup>347</sup>         | P | Pr | Labour pain                                          | 280 (280W) | TENS (NR) = 132                                   | Placebo TENS (0mA) = 148                                                                                                                                                                                                  | PRN                                                               | Pain intensity (VAS)                               | Analgesic consumption<br>Labour questionnaire                                                                                                                                                      |
| Thomas et al., 1995 <sup>348</sup>         | C | E  | Dysmenorrhea - primary                               | 29 (29W)   | TENS (HF) = 12                                    | Placebo TENS (0mA) = 12<br>TENS (LF) = 12                                                                                                                                                                                 | Fixed<br>1 x 20 mins / day x 2 days<br>2 sessions                 | Pain intensity (VAS)                               | Analgesic consumption<br>Patients perception of improvement (3 category scale)<br>Blood loss (3 category scale)<br>Nausea and vomiting (4 category scale)<br>Hours of work lost (3 category scale) |

08\_OL-TABLE1\_IncludedStudies

|                                           |   |    |                                        |          |                                                            |                                                                                                                                              |                                                                                                                                    |                                                                   |                                                                                                                                                                                                                 |
|-------------------------------------------|---|----|----------------------------------------|----------|------------------------------------------------------------|----------------------------------------------------------------------------------------------------------------------------------------------|------------------------------------------------------------------------------------------------------------------------------------|-------------------------------------------------------------------|-----------------------------------------------------------------------------------------------------------------------------------------------------------------------------------------------------------------|
| Thorsteinsson et al., 1978 <sup>349</sup> | C | E  | Chronic pain                           | 93 (53W) | TENS (NR) = 93                                             | Placebo TENS = 93 (0mA)                                                                                                                      | Fixed<br>1 x treatment at each of the following (i) at painful site (ii) over main nerve bundle (iii) at remote site<br>3 sessions | No primary outcomes                                               | Pain relief (4-categories)<br>• Minnesota<br>• Multiphasic<br>• Personality Inventory<br>• Duration of pain relief                                                                                              |
| Tilak et al., 2016 <sup>350</sup>         | P | Pr | Phantom limb pain                      | 26 (3W)  | TENS (LF, burst) = 13                                      | MVF = 13                                                                                                                                     | Fixed<br>1 x 20 mins x 4 days<br>4 sessions                                                                                        | Pain intensity (VAS)                                              | Universal pain score                                                                                                                                                                                            |
| Tokuda et al., 2014 <sup>351</sup>        | P | Pr | Post-op abdominal                      | 48 (19W) | TENS (HF) + Fentanyl (PCA) + No TENS (Control) = 16        | Placebo TENS (fading) + Fentanyl (PCA) = 16<br>Fentanyl (PCA) (SoC, no TENS control) = 16                                                    | PRN<br>1 x 60 min/day x 3 days                                                                                                     | Pain intensity (VAS)<br>• Resting pain<br>• Coughing<br>• Seating | Pulmonary Functions                                                                                                                                                                                             |
| Tonella et al., 2006 <sup>352</sup>       | P | E  | Post-op abdominal                      | 48 (20W) | TENS (HF) + usual care (analgesics and physiotherapy) = NR | Placebo TENS (0mA) + usual care (analgesics and physiotherapy) = NR<br>Usual care ((analgesics and physiotherapy) SoC, no TENS control) = NR | Fixed<br>1 x 30 mins for one day?<br>1 session                                                                                     | Pain intensity (VAS)                                              | Analgesic consumption                                                                                                                                                                                           |
| Topuz et al., 2004 <sup>353</sup>         | P | Pr | Back pain - chronic low non-specific   | 60 (41W) | TENS (HF, conventional) = 15                               | Placebo TENS (0mA) = 12<br>TENS (LF) = 15<br>Percutaneous neuromodulation therapy = 13                                                       | Fixed<br>1 x 20 min/day x 5 days x 2 weeks<br>10 sessions                                                                          | Pain intensity (VAS)<br>• Resting<br>• On movement                | Low back pain outcome scale<br>Oswestry disability index<br>Beck Depression Inventory                                                                                                                           |
| Tosato et al., 2007 <sup>354</sup>        | P | E  | Temporomandibular disorders            | 20 (20W) | TENS (NR) = 10                                             | Massage therapy = 10                                                                                                                         | Fixed<br>1 x 30 mins<br>1 session                                                                                                  | Pain intensity (VAS)                                              | Electromyography (EMG) measures                                                                                                                                                                                 |
| Treacy, 1999 <sup>355</sup>               | P | Pr | Bruxism                                | 23 (10W) | TENS (LF) = 8                                              | Placebo TENS (0mA) = 8<br>Relaxation (muscular awareness training) = 8                                                                       | Fixed<br>20 to 30 mins / day x 2 / week x 4 months<br>20 sessions                                                                  | No primary outcome                                                | Muscle pain from physical examination<br>Degree of discomfort (7-point scale)<br>EMG<br>Cognitive-Somatic Anxiety Questionnaire<br>Beck Depression Inventory<br>Multidimensional health locus of control scales |
| Tsen et al., 2000 <sup>356</sup>          | P | Pr | Labour pain                            | 40 (40W) | TENS (MF) = NR                                             | Placebo TENS (0mA) = NR                                                                                                                      | PRN<br>During labour<br>1 session                                                                                                  | Pain intensity (VAS)                                              | Duration of analgesia<br>Pin Prick                                                                                                                                                                              |
| Tsen et al., 2001 <sup>357</sup>          | P | Pr | Labour pain                            | 40 (40W) | TENS (MF) = NR                                             | Placebo TENS (0mA) = NR                                                                                                                      | PRN<br>During labour<br>1 session                                                                                                  | Pain intensity (VAS)                                              | Duration of analgesia<br>Pin Prick                                                                                                                                                                              |
| Tsukayama et al., 2002 <sup>358</sup>     | P | Pr | Back pain - chronic low non-specific   | 20 (16W) | TENS (LF) = 10                                             | Electroacupuncture = 9                                                                                                                       | Fixed<br>1 x 15 mins / day x 2 / week x 2 weeks<br>4 sessions                                                                      | Pain intensity (VAS)                                              | Back pain profile<br>Adverse events                                                                                                                                                                             |
| Tucker et al., 2015 <sup>359</sup>        | P | Pr | Procedural pain - bone marrow sampling | 70 (32W) | TENS (HF) = 35                                             | Placebo TENS (sub threshold) = 35                                                                                                            | Fixed                                                                                                                              | Pain intensity (NRS)                                              | Treatment perception questionnaire                                                                                                                                                                              |

08\_OL-TABLE1\_IncludedStudies

|                                           |   |    |                                         |          |                                                                                  |                                                                                                                  |                                                                                                   |                                                                                            |                                                                                                      |
|-------------------------------------------|---|----|-----------------------------------------|----------|----------------------------------------------------------------------------------|------------------------------------------------------------------------------------------------------------------|---------------------------------------------------------------------------------------------------|--------------------------------------------------------------------------------------------|------------------------------------------------------------------------------------------------------|
|                                           |   |    |                                         |          |                                                                                  |                                                                                                                  | throughout procedure<br>1 session                                                                 |                                                                                            |                                                                                                      |
| Tugay et al., 2007 <sup>360</sup>         | P | E  | Dysmenorrhea - primary                  | 32 (32W) | TENS (HF) = 17                                                                   | IFT = 15                                                                                                         | Fixed<br>1 x 20 mins<br>1 session                                                                 | Pain intensity (VAS)<br>• Menstrual pain<br>• Referred lower limbs pain<br>• Low back pain | None                                                                                                 |
| Tulgar et al., 1991 <sup>361</sup>        | C | E  | Several painful conditions              | 27 (11W) | TENS (HF, conventional) = 27                                                     | TENS (LF, burst = 27<br>TENS (modulated frequency) = 27                                                          | Fixed<br>1 x 30 mins / day<br>switch next day 3 days                                              | Pain intensity (VAS)                                                                       | None                                                                                                 |
| Tulgar et al., 1991 <sup>362</sup>        | C | E  | Several painful conditions              | 14 (7W)  | TENS (HF, conventional) = 14                                                     | TENS (LF, burst) = 27<br>TENS (high rate frequency modulation) = 27<br>TENS (low rate frequency modulation) = 27 | Fixed<br>1 x 20 mins / day<br>switch each day 4 days equals 4 tests<br>1 session                  | Pain intensity (VAS)                                                                       | Duration of pain relief                                                                              |
| Unterrainer et al., 2010 <sup>363</sup>   | P | Pr | Post-op lumbar                          | 38 (19W) | TENS + PCA = 13                                                                  | Placebo TENS + PCA (control) = 11<br><br>Placebo TENS + PCA (Pre) + TENS + PCA (post) = 14                       | Fixed<br>1 x 30 mins pre-op +<br>1 x 8 hours post-op<br>+ 1 x 30 mins post-op day 1<br>2 sessions | Pain intensity (VAS)                                                                       | Analgesic consumption<br>Mini Mental State Examination<br>The Short Cognitive Performance Test       |
| Unterrainer et al., 2012 <sup>364</sup>   | P | Pr | Post-op lumbar interbody fusion         | 35 (17W) | TENS (HF) + placebo PCA = 17                                                     | PCA (piritramide) + Placebo TENS (0mA) (SoC, sham TENS control) = 18                                             | Fixed<br>1 x 30 mins pre-op<br>1 x 24 hours post up<br>1 session                                  | Pain intensity (VAS)                                                                       | Analgesic consumption (PCA - rescue meds)                                                            |
| Upton et al., 2017 <sup>365</sup>         | C | E  | Peripheral diabetic neuropathy          | 5        | TENS (HF, conventional) = 5                                                      | TENS (LF, acupuncture-like) = 5                                                                                  | Fixed<br>1 x 30 mins / day x<br>10 days<br>10 sessions                                            | Pain intensity (NRS)                                                                       | McGill Pain Questionnaire<br>Mechanical detection threshold<br>Patient's Global Impression of Change |
| Vaidya, 2018 <sup>366</sup>               | P | Pr | Pregnancy induced posterior pelvic pain | 30 (30W) | TENS (HF) = 15                                                                   | Mobilisation of sacroiliac Joint = 15                                                                            | Fixed<br>1 x 30 mins / day x 3 / week<br>5 sessions                                               | Pain intensity (VAS)                                                                       | Roland Morris disability Questionnaire                                                               |
| Vaillancourt et al., 2019 <sup>367</sup>  | P | Pr | Chronic pain - Various                  | 18 (18W) | TENS (HF) + exercise = 7                                                         | Placebo TENS (0mA) + exercise = 8                                                                                | Fixed<br>2 x 45mins / session<br>x 2 / week<br>x 4 weeks,<br>8 sessions                           | Pain intensity (NRS)                                                                       | Short-Form<br>McGill Pain Questionnaire<br>Brief Pain Inventory<br>Beck Depression Inventory         |
| Valenza et al., 2016 <sup>368</sup>       | P | E  | Knee pain - anterior                    | 84 (52W) | TENS = 28                                                                        | No treatment = 28<br>Stretching = 28                                                                             | Fixed<br>1 x 20 mins<br>1 session                                                                 | No primary outcome                                                                         | Analgesic consumption<br>Roland Morris disability score<br>Pressure algometry                        |
| van der Ploeg et al., 1996 <sup>369</sup> | P | Pr | Labour pain                             | 94 (94W) | TENS (HF, continuous + LF, burst) + analgesics (pethidine/promethazine PCA) = 46 | Placebo TENS (NR) + analgesics (pethidine/promethazine, PCA) = 48                                                | PRN                                                                                               | Pain intensity (VAS)                                                                       | Duration of stages of labour<br>Mode of delivery,<br>Foetal status<br>Apgar scores                   |

08\_OL-TABLE1\_IncludedStudies

|                                           |   |    |                                                     |          |                                                                          |                                                                                                                                                                             |                                                                |                                                                                                         |                                                                                                                                                                                                          |
|-------------------------------------------|---|----|-----------------------------------------------------|----------|--------------------------------------------------------------------------|-----------------------------------------------------------------------------------------------------------------------------------------------------------------------------|----------------------------------------------------------------|---------------------------------------------------------------------------------------------------------|----------------------------------------------------------------------------------------------------------------------------------------------------------------------------------------------------------|
| van der Spank et al., 2000 <sup>370</sup> | P | E  | Labour pain                                         | 59 (94W) | TENS (HF, continuous, burst) + Epidural (drug NR) = 24                   | Epidural (drug NR) (SoC, no TENS control) = 35                                                                                                                              | PRN                                                            | Pain intensity (VAS)                                                                                    | Analgesic consumption<br>TENS satisfaction questionnaire                                                                                                                                                 |
| Vance et al., 2012 <sup>371</sup>         | P | E  | Osteoarthritis - knee                               | 75 (46W) | TENS (HF) = 25                                                           | Placebo TENS (Fading) = 25<br>TENS (LF) = 25                                                                                                                                | Fixed<br>1 x 40 to 50 mins<br>1 session                        | Pain intensity (VAS)<br>• Rest<br>• On movement (Timed-up-and-go)<br>• Heat evoked - temporal summation | Quantitative sensory testing<br>Pressure algometry, Cutaneous mechanical pain threshold, pressure pain threshold (PPT), heat pain threshold, heat temporal summation]<br>Timed up and go                 |
| Vitalii and Oleg, 2014 <sup>372</sup>     | P | Pr | Neuropathic pain associated with spinal cord injury | 21 (2W)  | TENS (LF) + gabapentin = 11                                              | Placebo TENS (no current stimulation) + gabapentin = 10                                                                                                                     | Fixed<br>1 x 30 mins / day x 10 days<br>10 sessions            | Pain intensity (VAS)                                                                                    | Analgesic consumption                                                                                                                                                                                    |
| Vrouva et al., 2019 <sup>373</sup>        | P | Pr | Rotator cuff                                        | 42 (20W) | TENS (HF) + kinesiotherapy                                               | microcurrent electrical nerve stimulation + kinesiotherapy                                                                                                                  | Fixed<br>1 x 20 mins / day x 5 / week x 3 weeks<br>15 sessions | Pain intensity (NRS)                                                                                    | Shoulder pain and disability index (SPADI)<br>EuroQoL-5 (Quality of life)                                                                                                                                |
| Walker et al., 1991 <sup>374</sup>        | P | Pr | Post-op (rehabilitation - total knee arthroplasty)  | 48 (NR)  | TENS (HF) + continuous passive motion + analgesic (various opioids) = 18 | TENS (subthreshold) + continuous passive motion + analgesics (various opioids) = 18<br>Continuous passive motion + analgesics (various opioids) (SoC, no TENS control) = 12 | PRN<br>continuously 3 days post op                             | No primary outcome                                                                                      | Analgesic consumption                                                                                                                                                                                    |
| Wang et al., 2009 <sup>375</sup>          | C | E  | Dysmenorrhea - primary                              | 21 (21W) | TENS (HF) = 21                                                           | Placebo TENS (0mA) = 21                                                                                                                                                     | Fixed<br>1 to 2 x 30 mins / day x 2 days                       | Pain intensity (NRS, 11-point scale)                                                                    | Pain location<br>Autonomic and related symptoms questionnaire<br>SF-36                                                                                                                                   |
| Warfield et al., 1985 <sup>376</sup>      | P | Pr | Post-op thoracotomy                                 | 24 (NR)  | TENS (NR) + opioids = 12                                                 | Placebo TENS (0mA) + opioids = 12                                                                                                                                           | PRN<br>Continuous stimulation x ? days                         | Pain intensity (NRS)                                                                                    | Analgesic consumption<br>Ability to tolerate chest physical therapy (3 categories)<br>Recovery room stay                                                                                                 |
| Warke et al., 2004 <sup>377</sup>         | P | Pr | Back pain – low, multiple sclerosis                 | 15 (NR)  | TENS (HF) = 5                                                            | Placebo TENS (0mA) = 5<br>TENS (LF) = 5                                                                                                                                     | Fixed<br>1 x > 45 mins/day x 6 weeks<br>>42 sessions           | Pain intensity (VAS)                                                                                    | Roland Morris Disability Questionnaire<br>Barthel Activities of Daily Living<br>Rivermead Mobility Index<br>McGill Pain Questionnaire<br>Leeds Multiple Sclerosis Quality of Life Questionnaire<br>SF-36 |
| Warke et al., 2006 <sup>378</sup>         | P | Pr | Back pain – low, multiple sclerosis                 | 90 (69W) | TENS (HF) = 30                                                           | Placebo TENS (0mA) = 30<br>TENS (LF) = 30                                                                                                                                   | PRN<br>>2 x 45 mins / day x 6 weeks<br>>42 sessions            | Pain intensity (VAS)                                                                                    | Analgesic consumption<br>McGill Pain Questionnaire<br>Roland Morris Disability Questionnaire<br>Barthel Index<br>Rivermead Mobility Index<br>Multiple Sclerosis Quality of Life-54 Instrument            |

08\_OL-TABLE1\_IncludedStudies

|                                            |   |    |                                                             |            |                                                |                                                                                                       |                                                                |                                                                   |                                                                                                     |
|--------------------------------------------|---|----|-------------------------------------------------------------|------------|------------------------------------------------|-------------------------------------------------------------------------------------------------------|----------------------------------------------------------------|-------------------------------------------------------------------|-----------------------------------------------------------------------------------------------------|
| Yameen et al., 2011 <sup>379</sup>         | P | Pr | Neuralgia - trigeminal                                      | 31 (20W)   | TENS (HF, continuous pattern) = 16             | TENS (LF, Burst) = 15                                                                                 | PRN x 3 weeks                                                  | Pain intensity (VAS)                                              | None                                                                                                |
| Yesil et al., 2018 <sup>380</sup>          | P | Pr | Neck pain - chronic non-specific                            | 81 (56W)   | TENS (HF) + Exercise (neck stabilisation) = 27 | Exercise (neck stabilisation) (SoC, no TENS control) = 26<br>IFT + Exercise (neck stabilisation) = 27 | Fixed<br>1 x 25 mins / day x 5 / week x 3 weeks<br>15 sessions | Pain intensity (VAS)                                              | Range of motion<br>Neck Disability index<br>SF-36<br>Beck Depression Inventory                      |
| Yilmaz et al., 2020 <sup>381</sup>         | P | Pr | Post op - inguinal herniorrhaphy                            | 52 (3W)    | TENS (HF) + intramuscular NSAID = 26           | Placebo TENS (0mA) + intramuscular NSAID = 26                                                         | Fixed<br>5 x 30 mins / day x 1 day<br>5 sessions               | Pain intensity (VAS)                                              | Analgesic consumption,<br>Newcastle Satisfaction with Nursing Care Scale<br>Vital signs             |
| Yilmazer et al., 2012 <sup>382</sup>       | P | Pr | Procedural pain - office endometrial biopsy                 | 65 (65W)   | TENS (NR) + Oral naproxen = 33                 | Placebo TENS + oral naproxen (0mA) = 32                                                               | Fixed<br>10 mins pre and during procedure<br>1 session         | Pain intensity (VAS)                                              | Blood pressure and pulse<br>Vasovagal symptoms questionnaire                                        |
| Yokoyama et al., 2004 <sup>383</sup>       | P | Pr | Back pain - chronic low non-specific                        | 53 (30W)   | TENS (HF) + analgesics = 18                    | Percutaneous electrical nerve stimulation + analgesics = 18<br>PENS + TENS + analgesics = 17          | Fixed<br>1 x 20 mins / day x 2 / week x 8 weeks<br>16 sessions | Pain intensity (VAS)                                              | Analgesic consumption<br>Degree of impairment (5 categories)                                        |
| Yoshimizu et al., 2012 <sup>384</sup>      | C | E  | Neck pain - chronic non-specific ('Shoulder and neck pain') | 90 (52W)   | TENS (LF) = 90                                 | Electroacupuncture = 90                                                                               | Fixed<br>1 x 15 mins<br>1 session                              | Pain intensity (VAS)                                              | SF-36                                                                                               |
| Yüksel et al., 2019 <sup>385</sup>         | P | E  | Fibromyalgia                                                | 42 (NR)    | TENS (HF) = 21                                 | Acupuncture = 21                                                                                      | Fixed<br>1 x 20 mins<br>1 session                              | Pain intensity (VAS)                                              | Pressure algometry pain threshold<br>Beck Depression Inventory<br>Fibromyalgia Impact Questionnaire |
| Yurtkuran and Kocagil, 1999 <sup>386</sup> | P | Pr | Osteoarthritis - knee                                       | 100 (91W)  | TENS (LF) = 25                                 | Electroacupuncture = 25<br>Ice massage = 25<br>Placebo TENS (no current) = 25                         | Fixed<br>1 x 20 mins / day x 5 / week x 2 weeks<br>10 sessions | Pain intensity (5 categories)<br>• Present pain<br>• Overall pain | 50-foot walking time<br>Quadriceps muscle strength<br>Range of motion                               |
| Zakariaee et al., 2019 <sup>387</sup>      | P | Pr | Post op - episiotomy                                        | 120 (120W) | TENS (HF) + routine care = 40                  | Placebo TENS (0mA) + routine care = 40<br>Routine care = 40                                           | Fixed<br>1 x 60 mins<br>1 session                              | Pain intensity (NRS)                                              | TENS' complications<br>satisfaction rate                                                            |
| Zhang et al., 2020 <sup>388</sup>          | P | E  | Chronic TMJ pain (TMJ disc displacement without reduction)  | 20 (10W)   | TENS (LF, AL-TENS) = 10                        | Placebo TENS (0mA) = 10                                                                               | Fixed<br>1 x 45 mins<br>1 session                              | Pain intensity (NRS)<br>• Movement – jaw opening and closing      | Mandibular motor function using Cranio-Mandibular Evaluation System                                 |
| Zhou et al., 2018 <sup>389</sup>           | P | Pr | Hemiplegic shoulder pain                                    | 90 (19W)   | TENS (HF) + rehab programme = 32               | NMES + rehabilitation programme = 31<br>Conventional rehab programme (SoC, no TENS control) = 18      | Fixed<br>1 x 60 mins / day x 5 days x 4 weeks<br>20 sessions   | Pain intensity (NRS)                                              | Fugl-Meyer<br>Modified Ashworth scale<br>Barthel Index<br>Stroke specific quality of life scale     |

## 08\_OL-TABLE1\_IncludedStudies

- 1
- 2 • Design: P = Parallel group; C = Crossover.
- 3 • Type: E = Predominantly Explanatory; Pr = Predominantly Pragmatic (mixed).
- 4 • Sample: W = women
- 5 • Primary TENS intervention group as selected by reviewers: Size of sample arm '=' on enrolment; HF = high frequency >10 pps); LF = low frequency < 10pps or LF burst pattern. AF = alternating frequency, MF = modulated frequency;
- 6 VF = various frequencies; burst = burst pattern of pulse delivery; HI = High Intensity TENS
- 7 • Comparison Intervention(s). Listed in reviewers' order of priority; number in trial arm '='; Placebo TENS (0mA – sham device or dead batteries); Fading = TENS current administered briefly and then turned off e.g. applied for 30 seconds
- 8 and then drifted off to 0mA over a 15 second time frame; Active = Placebo TENS used currents above 0mA, >SDT- infrequent pulses = current above sensory detection threshold and time between pulses modified so that they were
- 9 delivered very infrequently (e.g. inter-pulse interval adjusted from 330 ms to 33 s to avoid any analgesic effect), >SDT- TENS remote = current above sensory detection threshold and delivered at a site considered to be completely
- 10 unrelated to the site of the pain; categorised as considered as standard of care (SoC)
- 11 • TENS regimen: Fixed = regimen either delivered as such or advice given to patient on regimen to use themselves; PRN = 'pro re nata', when necessary; Extracted elements of regimen as min. each session / no. sessions / day / session days
- 12 / week / weeks / course of treatment (no. of TENS sessions));
- 13 • Primary outcome measures in relation to this review: Pain intensity as dichotomous or continuous data
- 14 • Secondary outcomes: Analgesic consumption – general term to encompass any time of measurement associated with analgesic medication
- 15 • Other Abbreviations: IFT=Interferential current therapy; NSAID = Non-Steroidal Anti-Inflammatory Drugs; PENS = Percutaneous electrical nerve stimulation, TONS = transcutaneous occipital nerve stimulation EA = electroacupuncture;
- 16 VAS = visual analogue scale; NRS = Numerical rating scale; PCA = Patient controlled analgesia; BPI = Brief Pain Inventory LANSS = Leeds Assessment of Neuropathic Symptoms and Signs; WOMAC = Western Ontario and McMaster
- 17 Universities Osteoarthritis Index; NR = Not reported

**REFERENCES – INCLUDED STUDIES\***

\*Note: Reference numbering in this list relates only to studies cited in this table

- 19 1. Abbasi AA, Shehzad M, Hussain A. Transcutaneous electrical nerve encouragement by way of the adjunct to non-steroidal unwilling-inflammatory medicines for aching management
- 20 throughout pleurodesis. *Indo American Journal of Pharmaceutical Sciences* 2019; 6(6): 12943-7.
- 21 2. Abelson K, Langely GB, Sheppard H. Transcutaneous electrical nerve stimulation in rheumatoid arthritis. *New Zealand Medical Journal* 1983; 96(727): 156-8.
- 22 3. Abreu EA, Santos JDMd, Ventura PLJRD. Efetividade da eletroestimulação nervosa transcutânea no alívio da dor durante o trabalho de parto: um ensaio clínico controlado. 2010;
- 23 11(4): 313-8.
- 24 4. Acedo AA, Luduvic Antunes AC, Barros dos Santos A, et al. Upper trapezius relaxation induced by TENS and interferential current in computer users with chronic nonspecific neck
- 25 discomfort: An electromyographic analysis. *Journal of Back and Musculoskeletal Rehabilitation* 2015; 28(1): 19-24.
- 26 5. Adedoyin RA, Olaogun MOB, Oyeyemi AL. Transcutaneous electrical nerve stimulation and interferential current combined with exercise for the treatment of knee osteoarthritis: a
- 27 randomised controlled trial. *Hong Kong Physiotherapy Journal* 2005; 23: 13-9.
- 28 6. Ahmed MT. Effect of transcutaneous electrical nerve stimulation on postoperative pain after inguinal hernia repair: A randomized placebo-controlled trial. [Turkish]. *Turkiye Fiziksel*
- 29 *Tip ve Rehabilitasyon Dergisi* 2010; 56(4): 170-6.
- 30 7. Ahmed GM, Maher EA, Elnassag BAEMR, Sayed HM, Kabbash SI. Effects of repetitive transcranial magnetic stimulation versus transcutaneous electrical nerve stimulation to
- 31 decrease diabetic neuropathic pain. *International Journal of Therapy and Rehabilitation* 2020; 27(2).
- 32 8. Alcidi L, Beneforti E, Maresca M, Santosuosso U, Zoppi M. Low power radiofrequency electromagnetic radiation for the treatment of pain due to osteoarthritis of the knee. *Reumatismo*
- 33 *2007; 59(2): 140-5.*
- 34 9. Ali J, Yaffe CS, Serrette C. The effect of transcutaneous electric nerve stimulation on postoperative pain and pulmonary function. *Surgery* 1981; 89(4): 507-12.
- 35 10. Alizade MH, Ahmadzad S. A comparison of exercise therapy and transcutaneous electrical nerve stimulation for the treatment of chronic low back pain. *World J Sport Sci* 2009;
- 36 2(1): 43-7.
- 37 11. Allais G, De Lorenzo C, Quirico PE, et al. Non-pharmacological approaches to chronic headaches: Transcutaneous electrical nerve stimulation, lasertherapy and acupuncture in
- 38 transformed migraine treatment. *Neurological Sciences* 2003; 24(SUPPL. 2): S138-S42.
- 39 12. Alm WA, Gold ML, Weil LS. Evaluation of transcutaneous electrical nerve stimulation (TENS) in podiatric surgery. *Journal of the American Podiatry Association* 1979; 69(9): 537-
- 40 42.
- 41 13. Al-Smadi J, Warke K, Wilson I, et al. A pilot investigation of the hypoalgesic effects of transcutaneous electrical nerve stimulation upon low back pain in people with multiple
- 42 sclerosis. *Clinical Rehabilitation* 2003; 17(7): 742-9.



08\_OL-TABLE1\_IncludedStudies

14. Altay F, Durmus D, Cantürk F. Effects of TENS on pain, disability, quality of life and depression in patients with knee osteoarthritis. *Turkish Journal of Rheumatology* 2010; 25(3): 116-21.
15. Alvarez-Arenal A, Junquera LM, Fernandez JP, Gonzalez I, Olay S. Effect of occlusal splint and transcutaneous electric nerve stimulation on the signs and symptoms of temporomandibular disorders in patients with bruxism. *Journal of Oral Rehabilitation* 2002; 29(9): 858-63.
16. Alves Silverio KC, Brasolotto AG, Thais Donalson Siqueira L, Carneiro CG, Fukushiro AP, Roberto de Jesus Guirro R. Effect of application of transcutaneous electrical nerve stimulation and laryngeal manual therapy in dysphonic women: clinical trial. *Journal of Voice* 2015; 29(2): 200-8.
17. Amer-Cuenca JJ, Goicoechea C, Girona-Lopez A, et al. Pain relief by applying transcutaneous electrical nerve stimulation (TENS) during unsedated colonoscopy: a randomized double-blind placebo-controlled trial. *European Journal of Pain* 2011; 15(1): 29-35.
18. AminiSaman J, Karimpour H, Hemmatpour B, Mohammadi S, Darvishi S, Kawyannejad R. Effect of TENS on the Pain Intensity during Insertion of Needle in Patients Undergoing Spinal anesthesia: A Randomized Controlled Study. *Journal of Acupuncture and Meridian Studies* 2020.
19. Angulo DL, Colwell Jr CW. Use of postoperative TENS and continuous passive motion following total knee replacement. *Journal of Orthopaedic and Sports Physical Therapy* 1990; 11(12): 599-604.
20. Ardic F, Sarhus M, Topuz O. Comparison of two different techniques of electrotherapy on myofascial pain. *Journal of Back and Musculoskeletal Rehabilitation* 2002; 16(1): 11-6.
21. Arvidsson I, Eriksson E. Postoperative TENS pain relief after knee surgery: objective evaluation. *Orthopedics* 1986; 9(10): 1346-51.
22. Asgari Z, Tavoli Z, Hosseini R, et al. A comparative Study between Transcutaneous Electrical Nerve Stimulation and Fentanyl to Relieve Shoulder Pain during Laparoscopic Gynecologic Surgery under Spinal Anesthesia: A Randomized Clinical Trial. *Pain Research and Management* 2018; 2018: 9715142.
23. Atamaz FC, Durmaz B, Baydar M, et al. Comparison of the efficacy of transcutaneous electrical nerve stimulation, interferential currents, and shortwave diathermy in knee osteoarthritis: a double-blind, randomized, controlled, multicenter study. *Archives of Physical Medicine and Rehabilitation* 2012; 93(5): 748-56.
24. Aydin G, Tomruk S, Keles I, Demir SO, Orkun S. Transcutaneous electrical nerve stimulation versus baclofen in spasticity: Clinical and electrophysiologic comparison. *American Journal of Physical Medicine and Rehabilitation* 2005; 84(8): 584-92.
25. Azatcam G, Atalay NS, Akkaya N, et al. Comparison of effectiveness of Transcutaneous Electrical Nerve Stimulation and Kinesio Taping added to exercises in patients with myofascial pain syndrome. *Journal of Back and Musculoskeletal Rehabilitation* 2017; 30(2): 291-8.
26. Báez-Suárez A, Martín-Castillo E, García-Andújar J, García-Hernández J, Quintana-Montesdeoca MP, Loro-Ferrer JF. Evaluation of different doses of transcutaneous nerve stimulation for pain relief during labour: a randomized controlled trial. *Trials* 2018; 19(1): 652.
27. Bai HY, Bai HY, Yang ZQ. Effect of transcutaneous electrical nerve stimulation therapy for the treatment of primary dysmenorrhea. *Medicine* 2017; 96(36): e7959.
28. Baki ED, Oz G, Kokulu S, et al. Comparison of Transcutaneous Electrical Nerve Stimulation and Paravertebral Block for Postthoracotomy Pain Relief. *The Thoracic and Cardiovascular Surgeon* 2015; 63(6): 514-8.
29. Ballegaard S, Christophersen S, Dawids S, Hesse J, Olsen N. Acupuncture and transcutaneous electric nerve stimulation in the treatment of pain associated with chronic pancreatitis. A randomized study. *Scand J Gastroenterol* 1985; 20(10): 1249-54.
30. Barbarisi M, Pace MC, Passavanti MB, et al. Pregabalin and transcutaneous electrical nerve stimulation for postherpetic neuralgia treatment. *The Clinical Journal of Pain* 2010; 26(7): 567-72.
31. Barker R, Lang T, Steinlechner B, et al. Transcutaneous electrical nerve stimulation as prehospital emergency interventional care: Treating acute pelvic pain in young women. *Neuromodulation* 2006; 9(2): 136-42.
32. Barker KL, Elliott CJ, Sackley CM, Fairbank JC. Treatment of chronic back pain by sensory discrimination training. A Phase I RCT of a novel device (FairMed) vs. TENS. *BMC Musculoskeletal Disorders* 2008; 9: 97.
33. Başkurt Z, Başkurt F, Özcan A, Yilmaz Ö. The immediate effects of heat and TENS on pressure pain threshold and pain intensity in patients with Stage I shoulder impingement syndrome. *The Pain Clinic* 2006; 18(1): 81-5.
34. Bayindir O, Paker T, Akpınar B, Erenturk S, Askin D, Aytac A. Use of transcutaneous electrical nerve stimulation in the control of postoperative chest pain after cardiac surgery. *Journal of Cardiothoracic and Vascular Anesthesia* 1991; 5(6): 589-91.
35. Beckwée D, Bautmans I, Lefeber N, Lievens P, Scheerlinck T, Vaes P. Effect of Transcutaneous Electric Nerve Stimulation on Pain after Total Knee Arthroplasty: a Blind Randomized Controlled Trial. *Journal of Knee Surgery* 2018; 31(2): 189-96.



## 08\_OL-TABLE1\_IncludedStudies

- 1
- 2 36. Benedetti F, Amanzio M, Casadio C, et al. Control of postoperative pain by transcutaneous electrical nerve stimulation after thoracic operations. *The Annals of Thoracic Surgery* 1997; 63(3): 773-6.
- 3
- 4 37. Bennett MI, Johnson MI, Brown SR, Radford H, Brown JM, Searle RD. Feasibility study of Transcutaneous Electrical Nerve Stimulation (TENS) for cancer bone pain. *The Journal of Pain* 2010; 11(4): 351-9.
- 5
- 6 38. Bergeron-Vezina K, Filion C, Couture C, Vallee E, Laroche S, Leonard G. Adjusting Pulse Amplitude During Transcutaneous Electrical Nerve Stimulation Does Not Provide Greater Hypoalgesia. *Journal of Alternative and Complementary Medicine* 2018; 24(3): 262-7.
- 7
- 8 39. Bertalanffy A, Kober A, Bertalanffy P, et al. Transcutaneous electrical nerve stimulation reduces acute low back pain during emergency transport. *Academic Emergency Medicine* 2005; 12(7): 607-11.
- 9
- 10 40. Bi X, Lv H, Chen BL, Li X, Wang XQ. Effects of transcutaneous electrical nerve stimulation on pain in patients with spinal cord injury: a randomized controlled trial. *Journal of Physical Therapy Science* 2015; 27(1): 23-5.
- 11
- 12 41. Bilgili A, Cakir T, Dogan SK, Ercalik T, Filiz MB, Toraman F. The effectiveness of transcutaneous electrical nerve stimulation in the management of patients with complex regional pain syndrome: A randomized, double-blinded, placebo-controlled prospective study. *Journal of Back and Musculoskeletal Rehabilitation* 2016; 29(4): 661-71.
- 13
- 14 42. Binder P, Gustafsson A, Uvnas-Moberg K, Nissen E. Hi-TENS combined with PCA-morphine as post caesarean pain relief. *Midwifery* 2011; 27(4): 547-52.
- 15
- 16 43. Bjersa K, Andersson T. High frequency TENS as a complement for pain relief in postoperative transition from epidural to general analgesia after pancreatic resection. *Complementary Therapies in Clinical Practice* 2014; 20(1): 5-10.
- 17
- 18 44. Bjersa K, Jildenstaal P, Jakobsson J, Egardt M, Fagevik Olsen M. Adjunct High Frequency Transcutaneous Electric Stimulation (TENS) for Postoperative Pain Management during Weaning from Epidural Analgesia Following Colon Surgery: Results from a Controlled Pilot Study. *Pain Management Nursing* 2015; 16(6): 944-50.
- 19
- 20 45. Bloodworth DM, Nguyen BN, Garver W, et al. Comparison of stochastic vs. conventional transcutaneous electrical stimulation for pain modulation in patients with electromyographically documented radiculopathy. *American Journal of Physical Medicine and Rehabilitation* 2004; 83(8): 584-91.
- 21
- 22 46. Bolat MS, Cinar O, Asci R, Buyukalpelli R. A novel method for pain control: infiltration free local anesthesia technique (INFLATE) for transrectal prostatic biopsy using transcutaneous electrical nerve stimulation (TENS). *International Urology and Nephrology* 2019; 51(12): 2119-26.
- 23
- 24 47. Bono F, Salvino D, Mazza MR, et al. The influence of ictal cutaneous allodynia on the response to occipital transcutaneous electrical stimulation in chronic migraine and chronic tension-type headache: a randomized, sham-controlled study. *Cephalalgia* 2015; 35(5): 389-98.
- 25
- 26 48. Borjesson M, Eriksson P, Dellborg M, Eliasson T, Mannheimer C. Transcutaneous electrical nerve stimulation in unstable angina pectoris. *Coronary Artery Disease* 1997; 8(8-9): 543-50.
- 27
- 28 49. Borjesson M, Pilhall M, Eliasson T, Norssell H, Mannheimer C, Rolny P. Esophageal visceral pain sensitivity: Effects of TENS and correlation with manometric findings. *Digestive Diseases and Sciences* 1998; 43(8): 1621-8.
- 29
- 30 50. Borup L, Wurlitzer W, Hedegaard M, Kesmodel US, Hvidman L. Acupuncture as pain relief during delivery: a randomized controlled trial. *Birth* 2009; 36(1): 5-12.
- 31
- 32 51. Breit R, Van der Wall H. Transcutaneous electrical nerve stimulation for postoperative pain relief after total knee arthroplasty. *The Journal of Arthroplasty* 2004; 19(1): 45-8.
- 33
- 34 52. Buchmuller A, Navez M, Millette-Bernardin M, et al. Value of TENS for relief of chronic low back pain with or without radicular pain. *European Journal of Pain* 2012; 16(5): 656-65.
- 35
- 36 53. Bulut M, Özcan A, Çakan T, Mektas M, Çulha C. The Comparison of Effectiveness of TENS and Placebo TENS in Peripheral Neuropathic Pain in Patients with Type II Diabetes Mellitus. *Turkiye Klinikleri Journal of Medical Sciences* 2011; 31(4): 913-8.
- 37
- 38 54. Bundsen P, Ericson K, Peterson L, Thiringer K. Pain relief in labor by transcutaneous electrical nerve stimulation. Testing of a modified stimulation technique and evaluation of the neurological and biochemical condition of the newborn infant. *Acta Obstetrica et Gynecologica Scandinavica* 1982; 61(2): 129-36.
- 39
- 40 55. Can F, Tandogan R, Yilmaz I, Dolunay E, Erden Z. Rehabilitation of patellofemoral pain syndrome: TENS versus diadynamic current therapy for pain relief. *Pain Clinic* 2003; 15(1): 61-8.
- 41
- 42 56. Casale R, Damiani C, Maestri R, Wells CD. Pain and electrophysiological parameters are improved by combined 830-1064 high-intensity LASER in symptomatic carpal tunnel syndrome versus Transcutaneous Electrical Nerve Stimulation. A randomized controlled study. *European Journal of Physical and Rehabilitation Medicine* 2013; 49(2): 205-11.
- 43
- 44 57. Çebi AT. Effects of transcutaneous electrical nerve stimulation on pain after impacted third molar surgery. *Medicina Oral Patologia Oral y Cirugia Bucal* 2019; 24(3): e404-e8.
- 45
- 46 58. Celik EC, Erhan B, Gunduz B, Lakse E. The effect of low-frequency TENS in the treatment of neuropathic pain in patients with spinal cord injury. *Spinal cord* 2013; 51(4): 334-7.
59. Cetin N, Aytar A, Atalay A, Akman M. Comparing hot pack, short-wave diathermy, ultrasound, and TENS on isokinetic strength, pain, and functional status of women with osteoarthritic knees: a single-blind, randomized, controlled trial. *American Journal of Physical Medicine and Rehabilitation* 2008; 87(6): 443-51.

08\_OL-TABLE1\_IncludedStudies

60. Chandra A, Banavaliker JN, Das PK, Hasti S. Use of transcutaneous electrical nerve stimulation as an adjunctive to epidural analgesia in the management of acute thoracotomy pain. *Indian J Anaesth* 2010; 54(2): 116-20.
61. Cheing GL, Hui-Chan CW. Transcutaneous electrical nerve stimulation: nonparallel antinociceptive effects on chronic clinical pain and acute experimental pain. *Archives of Physical Medicine and Rehabilitation* 1999; 80(3): 305-12.
62. Cheing GL, Luk ML. Transcutaneous electrical nerve stimulation for neuropathic pain. *Journal of Hand Surgery* 2005; 30(1): 50-5.
63. Cheing GL, Hui-Chan CW, Chan KM. Does four weeks of TENS and/or isometric exercise produce cumulative reduction of osteoarthritic knee pain? *Clinical Rehabilitation* 2002; 16(7): 749-60.
64. Cheing GL, Tsui AY, Lo SK, Hui-Chan CW. Optimal stimulation duration of tens in the management of osteoarthritic knee pain. *Journal of Rehabilitation Medicine* 2003; 35(2): 62-8.
65. Chellappa D, Thirupathy M. Comparative efficacy of low-Level laser and TENS in the symptomatic relief of temporomandibular joint disorders: a randomized clinical trial. *Indian Journal of Dental Research* 2020; 31(1): 42-7.
66. Cherian JJ, Harrison PE, Benjamin SA, Bhavne A, Harwin SF, Mont MA. Do the Effects of Transcutaneous Electrical Nerve Stimulation on Knee Osteoarthritis Pain and Function Last? *The Journal of Knee Surgery* 2016; 29(6): 497-501.
67. Cherian JJ, Kapadia BH, Bhavne A, et al. Use of Transcutaneous Electrical Nerve Stimulation Device in Early Osteoarthritis of the Knee. *The Journal of Knee Surgery* 2015; 28(4): 321-7.
68. Cherian JJ, Kapadia BH, McElroy MJ, et al. Knee Osteoarthritis: Does Transcutaneous Electrical Nerve Stimulation Work? *Orthopedics* 2016; 39(1): e180-6.
69. Chesterton LS, Lewis AM, Sim J, et al. Transcutaneous electrical nerve stimulation as adjunct to primary care management for tennis elbow: pragmatic randomised controlled trial (TATE trial). *BMJ* 2013; 347: f5160.
70. Lewis M, Chesterton LS, Sim J, Mallen CD, Hay EM, van der Windt DA. An Economic Evaluation of TENS in Addition to Usual Primary Care Management for the Treatment of Tennis Elbow: Results from the TATE Randomized Controlled Trial. *PloS one* 2015; 10(8): e0135460.
71. Chia Y, Arulkumaran S, Chua S, Ratnam S. Effectiveness of transcutaneous electric nerve stimulator for pain relief in labour. *Asia Oceania J Obstet Gynaecol* 1990; 16(2): 145-51.
72. Chiou YF, Yeh ML, Wang YJ. Transcutaneous Electrical Nerve Stimulation on Acupuncture Points Improves Myofascial Pain, Moods, and Sleep Quality. *Rehabilitation Nursing* 2020; 45(4): 225-33.
73. Chitsaz A, Janghorbani M, Shaygannejad V, Ashtari F, Heshmatipour M, Freeman J. Sensory complaints of the upper extremities in multiple sclerosis: relative efficacy of nortriptyline and transcutaneous electrical nerve stimulation. *The Clinical Journal of Pain* 2009; 25(4): 281-5.
74. Chiu TT, Hui-Chan CW, Chein G. A randomized clinical trial of TENS and exercise for patients with chronic neck pain. *Clinical Rehabilitation* 2005; 19(8): 850-60.
75. Cipriano G, Jr., de Camargo Carvalho AC, Bernardelli GF, Tayar Peres PA. Short-term transcutaneous electrical nerve stimulation after cardiac surgery: effect on pain, pulmonary function and electrical muscle activity. *Interactive Cardiovascular and Thoracic Surgery* 2008; 7(4): 539-43.
76. Cipriano G, Jr., Neder JA, Umpierre D, et al. Sympathetic ganglion transcutaneous electrical nerve stimulation after coronary artery bypass graft surgery improves femoral blood flow and exercise tolerance. *Journal of Applied Physiology* 2014; 117(6): 633-8.
77. Coelho de Amorim JS, Braz Rossetti Mr, Mendes Braga NIH. Effects of manual therapy and electrotherapy on knee osteoarthritis. *ConScientiae Saude* 2014; 13(1): 11-20.
78. Cooperman AM, Hall B, Mikalacki K, Hardy R, Sardar E. Use of transcutaneous electrical stimulation in the control of postoperative pain. *American Journal of Surgery* 1977; 133(2): 185-7.
79. Coyne PJ, MacMurren M, Izzo T, Kramer T. Transcutaneous electrical nerve stimulator for procedural pain associated with intravenous needlesticks. *Journal of Intravenous Nursing* 1995; 18(5): 263-7.
80. Crompton AC, Johnson N, Dudek U, Batra N, Tucker A. Is transcutaneous electrical nerve stimulation of any value during cervical laser treatment? *British Journal of Obstetrics and Gynaecology* 1992; 99(6): 492-4.
81. Cuschieri RJ, Morran CG, McArdle CS. Transcutaneous electrical stimulation for postoperative pain. *Annals of the Royal College of Surgeons of England* 1985; 67(2): 127-9.
82. Cuschieri RJ, Morran CG, Pollock JG. Transcutaneous electrical stimulation for ischaemic pain at rest. *British Medical Journal* 1987; 295(6593): 306.
83. da Silva TFG, Suda EY, Marçulo CA, Paes FHS, Pinheiro GT. Comparison of transcutaneous electrical nerve stimulation and hydrotherapy effects on pain, flexibility and quality of life in patients with fibromyalgia. *Fisioterapia e Pesquisa* 2008; 15(2): 118-24 p.

## 08\_OL-TABLE1\_IncludedStudies

- 1
- 2 84. da Silva MP, Liebano RE, Rodrigues VA, Abla LE, Ferreira LM. Transcutaneous electrical nerve stimulation for pain relief after liposuction: a randomized controlled trial. *Aesthetic plastic surgery* 2015; 39(2): 262-9.
- 3
- 4 85. Dailey DL, Rakel BA, Vance CG, et al. Transcutaneous electrical nerve stimulation reduces pain, fatigue and hyperalgesia while restoring central inhibition in primary fibromyalgia. *Pain* 2013; 154(11): 2554-62.
- 5
- 6 86. Dailey DL, Vance CGT, Rakel BA, et al. Transcutaneous Electrical Nerve Stimulation Reduces Movement-Evoked Pain and Fatigue: A Randomized, Controlled Trial. *Arthritis & Rheumatology* 2020; 72(5): 824-36.
- 7
- 8 87. Davies JR. Ineffective transcutaneous nerve stimulation following epidural anaesthesia. *Anaesthesia* 1982 Apr;37(4):453-457 1982.
- 9 88. Dawood MY, Ramos J. Transcutaneous electrical nerve stimulation (TENS) for the treatment of primary dysmenorrhea: a randomized crossover comparison with placebo TENS and ibuprofen. *Obstetrics and gynecology* 1990; 75(4): 656-60.
- 10
- 11 89. De Angelis C, Perrone G, Santoro G, Nofroni I, Zichella L. Suppression of pelvic pain during hysteroscopy with a transcutaneous electrical nerve stimulation device. *Fertility and sterility* 2003; 79(6): 1422-7.
- 12
- 13 90. De Giorgi I, Castroflorio T, Sartoris B, Deregisbus A. The use of conventional transcutaneous electrical nerve stimulation in chronic facial myalgia patients. *Clinical oral investigations* 2017; 21(1): 275-80.
- 14
- 15 91. de Oliveira RGCQ, Silva, J.C., de Almeida, J.F., de Araajo, R.C., Pitangui, A.C.R. High and low frequency TENS for primary dysmenorrhea: preliminary study. *ConScientiae Saude* 2012; 11(1): 149-58.
- 16
- 17 92. de Orange FA, Amorim MMRd, Lima L. Uso da eletroestimulação transcutânea para alívio da dor durante o trabalho de parto em uma maternidade-escola: ensaio clínico controlado %J Revista Brasileira de Ginecologia e Obstetrícia. 2003; 25: 45-52.
- 18
- 19 93. de Sousa L, Gomes-Sponholz FA, Nakano AM. Transcutaneous electrical nerve stimulation for the relief of post-partum uterine contraction pain during breast-feeding: a randomized clinical trial. *The journal of obstetrics and gynaecology research* 2014; 40(5): 1317-23.
- 20
- 21 94. DeSantana JM, Santana-Filho VJ, Guerra DR, Sluka KA, Gurgel RQ, da Silva Jr WM. Hypoalgesic Effect of the Transcutaneous Electrical Nerve Stimulation Following Inguinal Herniorrhaphy: A Randomized, Controlled Trial. *Journal of Pain* 2008; 9(7): 623-9.
- 22
- 23 95. DeSantana J, Sluka K, Rocha LG. High and low frequency TENS reduce postoperative pain intensity after laparoscopic tubal ligation: A randomized controlled trial. *Clinical Journal of Pain* 2009; 25(2): 12-28.
- 24
- 25 96. Dewan A, Sharma R. Effectiveness of transcutaneous electrical nerve stimulation and interferential electrotherapy in adhesive capsulitis. *Pb Journal of Orthopaedics* 2011; 21(1): 64.
- 26
- 27 97. Deyo RA, Walsh NE, Martin DC, Schoenfeld LS, Ramamurthy S. A controlled trial of transcutaneous electrical nerve stimulation (TENS) and exercise for chronic low back pain. *The New England journal of medicine* 1990; 322(23): 1627-34.
- 28
- 29 98. Dibenedetto P, Iona LG, Zidarich V. CLINICAL-EVALUATION OF S-ADENOSYL-L-METHIONINE VERSUS TRANSCUTANEOUS ELECTRICAL NERVE-STIMULATION IN PRIMARY FIBROMYALGIA. *Current Therapeutic Research-Clinical and Experimental* 1993; 53(2): 222-9.
- 30
- 31 99. Dilekci E, Alpayci M, Bayram KB, et al. The efficacy of TENS in patients with lateral epicondylitis: A randomized controlled study. [Turkish]. *Turkiye Fiziksel Tip ve Rehabilitasyon Dergisi* 2016; 62(4): 297-302.
- 32
- 33 100. Dissanayaka TD, Pallegama RW, Suraweera HJ, Johnson MI, Kariyawasam AP. Comparison of the Effectiveness of Transcutaneous Electrical Nerve Stimulation and Interferential Therapy on the Upper Trapezius in Myofascial Pain Syndrome: A Randomized Controlled Study. *American journal of physical medicine & rehabilitation* 2016; 95(9): 663-72.
- 34
- 35 101. Dogu B, Yilmaz F, Karan A, Ergoz E, Kuran B. Comparative the effectiveness of occlusal splint and TENS treatments on clinical findings and pain threshold of temporomandibular disorders secondary to bruxism. [Turkish]. *Turkiye Fiziksel Tip ve Rehabilitasyon Dergisi* 2008; 54(4): 1-7.
- 36
- 37 102. Domaille M, Reeves B. TENS and pain control after coronary artery bypass surgery. *Physiotherapy* 1997; 83(10): 510-6.
- 38
- 39 103. Ebadi S, Ansari N, Ahadi T, Fallah E, Forogh B. No immediate analgesic effect of diadynamic current in patients with nonspecific low back pain in comparison to TENS. *Journal of Bodywork and Movement Therapies* 2018; 22(3): 693-9.
- 40
- 41 104. Ekblom A, Hansson P. Thermal sensitivity is not changed by acute pain or afferent stimulation. *Journal of neurology, neurosurgery, and psychiatry* 1987; 50(9): 1216-20.
- 42
- 43 105. Ekim A, Armagan O, Oner C. [Efficiency of TENS treatment in hemiplegic shoulder pain: a placebo controlled study]. *Agri : Agri (Algoloji) Dernegi'nin Yayin organidir = The journal of the Turkish Society of Algology* 2008; 20(1): 41-6.
- 44
- 45 106. Elboim-Gabyzon M, Andrawus Najjar S, Shtarker H. Effects of transcutaneous electrical nerve stimulation (TENS) on acute postoperative pain intensity and mobility after hip fracture: a double-blinded, randomized trial. *Clinical interventions in aging* 2019; 14: 1841-50.
- 46

08\_OL-TABLE1\_IncludedStudies

107. Elserty N, Kattabei O, Elhafez H. Effect of Fixed Versus Adjusted Transcutaneous Electrical Nerve Stimulation Amplitude on Chronic Mechanical Low Back Pain. *Journal of alternative and complementary medicine (New York, NY)* 2016; 22(7): 557-62.
108. Emmiler M, Solak O, Kocogullari C, et al. Control of acute postoperative pain by transcutaneous electrical nerve stimulation after open cardiac operations: a randomized placebo-controlled prospective study. *The heart surgery forum* 2008; 11(5): E300-3.
109. Engen DJ, Carns PE, Allen MS, et al. Evaluating efficacy and feasibility of transcutaneous electrical nerve stimulation for postoperative pain after video-assisted thoracoscopic surgery: A randomized pilot trial. *Complementary therapies in clinical practice* 2016; 23: 141-8.
110. Erden S, Senol Celik S. The effect of transcutaneous electrical nerve stimulation on post-thoracotomy pain. *Contemporary nurse* 2015; 51(2-3): 163-70.
111. Erdogan M, Erdogan A, Erbil N, Karakaya H, Demircan A. Prospective, randomized, placebo-controlled study of the effect of TENS on postthoracotomy pain and pulmonary function. *World journal of surgery* 2005; 29(12): 1563-70.
112. Erkkola R, Pikkola P, Kanto J. Transcutaneous nerve stimulation for pain relief during labour: a controlled study. *Annales chirurgiae ET gynaecologiae* 1980; 69(6): 273-7.
113. Escortell-Mayor E, Riesgo-Fuertes R, Garrido-Elustondo S, et al. Primary care randomized clinical trial: manual therapy effectiveness in comparison with TENS in patients with neck pain. *Manual therapy* 2011; 16(1): 66-73.
114. Escortell Mayor E, Lebrijo Perez G, Perez Martin Y, Asunsolo del Barco A, Riesgo Fuertes R, Saa Requejo C. [Randomized clinical trial for primary care patients with neck pain: manual therapy versus electrical stimulation]. *Atencion primaria* 2008; 40(7): 337-43.
115. Esteban Gonzalez P, Novoa NM, Varela G. Transcutaneous Electrical Nerve Stimulation Reduces Post-Thoractomy Ipsilateral Shoulder Pain. A Prospective Randomized Study. *Archivos de bronconeumologia* 2015; 51(12): 621-6.
116. Eyigor S, Karapolat H, Ibisoglu U, Durmaz B. Does transcutaneous electrical nerve stimulation or therapeutic ultrasound increase the effectiveness of exercise for knee osteoarthritis: A randomized controlled study. [Turkish]. *Agri : Agri (Algoloji) Dernegi'nin Yayin organidir = The journal of the Turkish Society of Algology* 2008; 20(1): 32-40.
117. Eyigor C, Eyigor S, Kivilcim Korkmaz O. Are intra-articular corticosteroid injections better than conventional TENS in treatment of rotator cuff tendinitis in the short run? A randomized study. *European journal of physical and rehabilitation medicine* 2010; 46(3): 315-24.
118. Facci LM, Nowotny JP, Tormem F, Trevisani VF. Effects of transcutaneous electrical nerve stimulation (TENS) and interferential currents (IFC) in patients with nonspecific chronic low back pain: randomized clinical trial. *Sao Paulo medical journal = Revista paulista de medicina* 2011; 129(4): 206-16.
119. Farahani DM, Tavallaie SA, Ahmadi K, Ashtiani AF. Comparison of Neurofeedback and Transcutaneous Electrical Nerve Stimulation Efficacy on Treatment of Primary Headaches: A Randomized Controlled Clinical Trial. *Iranian Red Crescent Medical Journal* 2014; 16(8).
120. Farina S, Casarotto M, Benelle M, et al. A randomized controlled study on the effect of two different treatments (FREMS AND TENS) in myofascial pain syndrome. *Europa medicophysica* 2004; 40(4): 293-301.
121. Fatima N, Sarfraz N. Comparison of High Versus Low Transcutaneous Electrical Nerve Stimulation for Pain Management After Caesarean Section: A Clinical Trial. *Annals of King Edward Medical University Lahore Pakistan* 2019; 25(2).
122. Ferraz FS, Moreira CMC. Eletroanalgesia com utilizacao da TENS no pos-operatorio de cirurgia cardiaca (Electroanalgesia with TENS in postoperative of cardiac surgery) [Portuguese]. *Fisioterapia em Movimento [Physical Therapy in Movement]* 2009 Jan-Mar;22(1):133-139 2009.
123. Ferreira FC, Issy AM, Sakata RK. Assessing the effects of transcutaneous electrical nerve stimulation (TENS) in post-thoracotomy analgesia. *Revista brasileira de anestesiologia* 2011; 61(5): 561-7, 308-10.
124. Ferreira AP, Costa DR, Oliveira AI, et al. Short-term transcutaneous electrical nerve stimulation reduces pain and improves the masticatory muscle activity in temporomandibular disorder patients: a randomized controlled trial. *Journal of applied oral science : revista FOB* 2017; 25(2): 112-20.
125. Finsen V, Persen L, Lovlien M, et al. Transcutaneous electrical nerve stimulation after major amputation. *The Journal of bone and joint surgery British volume* 1988; 70(1): 109-12.
126. Fiorelli A, Morgillo F, Milione R, et al. Control of post-thoracotomy pain by transcutaneous electrical nerve stimulation: effect on serum cytokine levels, visual analogue scale, pulmonary function and medication. *European journal of cardio-thoracic surgery : official journal of the European Association for Cardio-thoracic Surgery* 2012; 41(4): 861-8; discussion 8.
127. Fodor-Sertl B, Miller K, Hohenfellner B. (Transcutaneous electric nerve block in postoperative pain-therapy) [German]. *Zeitschrift fuer Physikalische Medizin, Balneologie, Medizinische Klimatologie* 1990; 19: 132-7.
128. Forogh B, Aslanpour H, Fallah E, Babaei-Ghazani A, Ebadi S. Adding high-frequency transcutaneous electrical nerve stimulation to the first phase of post anterior cruciate ligament reconstruction rehabilitation does not improve pain and function in young male athletes more than exercise alone: a randomized single-blind clinical trial. *Disability and rehabilitation* 2019; 41(5): 514-22.



## 08\_OL-TABLE1\_IncludedStudies

129. Forst T, Nguyen M, Forst S, Disselhoff B, Pohlmann T, Pftzner A. Impact of low frequency transcutaneous electrical nerve stimulation on symptomatic diabetic neuropathy using the new Salutaris (R) device. *Diabetes Nutrition & Metabolism* 2004; 17(3): 163-8.
130. Forster EL, Kramer JF, Lucy SD, Scudds RA, Novick RJ. Effect of TENS on pain, medications, and pulmonary function following coronary artery bypass graft surgery. *Chest* 1994; 106(5): 1343-8.
131. Fujii-Abe K, Umino M, Kawahara H, Terada C, Satomura K, Fukayama H. New method for postoperative pain relief using a combination of noxious and non-noxious stimuli after impacted wisdom tooth extraction. *Journal of oral science* 2019; 61(2): 364-9.
132. Galli TT, Chiavegato LD, Liebano RE. Effects of TENS in living kidney donors submitted to open nephrectomy: a randomized placebo-controlled trial. *European journal of pain (London, England)* 2015; 19(1): 67-76.
133. Galloway DJ, Boyle P, Burns HJ, Davidson PM, George WD. A clinical assessment of electroanalgesia following abdominal operations. *Surgery, gynecology & obstetrics* 1984; 159(5): 453-6.
134. Garcia-Perez S, Garcia-Rios MC, Perez-Marmol JM, et al. Effectiveness of Transcutaneous Electrical Nerve Stimulation Energy in Older Adults: A Pilot Clinical Trial. *Advances in skin & wound care* 2018; 31(10): 462-9.
135. Gerson GR, Jones RB, Luscombe DK. Studies on the concomitant use of carbamazepine and clomipramine for the relief of post-herpetic neuralgia. *Postgraduate medical journal* 1977; 53 Suppl 4: 104-9.
136. Ghoname ESA, Craig WF, White PF, et al. Percutaneous electrical stimulation for low back pain - A randomized crossover study. *Jama-Journal of the American Medical Association* 1999; 281(9): 818-23.
137. Ghoname ESA, White PF, Ahmed HE, Hamza MA, Craig WF, Noe CE. Percutaneous electrical nerve stimulation: an alternative to TENS in the management of sciatica. *Pain* 1999; 83(2): 193-9.
138. Gilbert JM, Gledhill T, Law N, George C. Controlled trial of transcutaneous electrical nerve stimulation (TENS) for postoperative pain relief following inguinal herniorrhaphy. *The British journal of surgery* 1986; 73(9): 749-51.
139. Grabiańska E, Leśniewicz J, Pieszyński I, Kostka J. Comparison of the analgesic effect of interferential current (IFC) and TENS in patients with low back pain. *Wiadomosci lekarskie (Warsaw, Poland)* 2015; 68(1): 13-9.
140. Graff-Radford S, Reeves J, Baker R, Chiu D. Effects of transcutaneous electrical nerve stimulation on myofascial pain and trigger point sensitivity. *Pain* 1989; 37(1): 1-5.
141. Grant DJ, Bishop\_Miller J, Winchester DM, Anderson M, Faulkner S. A randomized comparative trial of acupuncture versus transcutaneous electrical nerve stimulation for chronic back pain in the elderly. *Pain* 1999; 82(1): 9-13.
142. Gregorini C, Cipriano Jr G, De Aquino LM, Rodrigues Branco JN, Bernardelli GF. Short-duration transcutaneous electrical nerve stimulation in the postoperative period of cardiac surgery. [Portuguese, English]. *Arquivos brasileiros de cardiologia* 2010; 94(3): 325-31+45-51.
143. Grimmer K. A controlled double blind study comparing the effects of strong burst mode TENS and High Rate TENS on painful osteoarthritic knees. *Australian Journal of Physiotherapy* 1992; 38: 49-56.
144. Gschiel B, Kager H, Pipam W, Weichart K, Likar R. Analgesic efficacy of TENS therapy in patients with gonarthrosis. A prospective, randomised, placebo-controlled, double-blind study. [German]. *Schmerz (Berlin, Germany)* 2010; 24(5): 494-500.
145. Gunay Ucurum S, Kaya DO, Kayali Y, Askin A, Tekindal MA. Comparison of different electrotherapy methods and exercise therapy in shoulder impingement syndrome: a prospective randomized controlled trial. *Acta orthopaedica et traumatologica turcica* 2018; 52(4): 249-55.
146. Guo XJ, Jia J. Comparison of therapeutic effects on fibromyalgia syndrome between dermal-neurological electric stimulation and electric acupuncture. *Chinese Journal of Clinical Rehabilitation* 2005; 9(46): 171-3.
147. Hamza MA, White PF, Ahmed HE, Ghoname EA. Effect of the frequency of transcutaneous electrical nerve stimulation on the postoperative opioid analgesic requirement and recovery profile. *Anesthesiology* 1999; 91(5): 1232-8.
148. Hanfy HM, El-Bigawy A. Effects of transcutaneous electrical nerve stimulation versus acupressure in the treatment of primary dysmenorrhea. *Bull Fac Phys Ther Cairo Univ* 2004; 9: 2.
149. Hansson P, Ekblom A. Transcutaneous electrical nerve stimulation (TENS) as compared to placebo TENS for the relief of acute oro-facial pain. *Pain* 1983; 15(2): 157-65.
150. Hansson P, Ekblom A, Thomsson M, Fjellner B. Influence of naloxone on relief of acute oro-facial pain by transcutaneous electrical nerve stimulation (TENS) or vibration. *Pain* 1986; 24(3): 323-9.

08\_OL-TABLE1\_IncludedStudies

151. Hargreaves A, Lander J. Use of transcutaneous electrical nerve stimulation for postoperative pain. *Nursing research* 1989; 38(3): 159-61.
152. Harrison RF, Woods T, Shore M, Mathews G, Unwin A. Pain relief in labour using transcutaneous electrical nerve stimulation (TENS). A TENS/TENS placebo controlled study in two parity groups. *British journal of obstetrics and gynaecology* 1986; 93(7): 739-46.
153. Hart JM, Kuenze CM, Pietrosimone BG, Ingersoll CD. Quadriceps function in anterior cruciate ligament-deficient knees exercising with transcutaneous electrical nerve stimulation and cryotherapy: a randomized controlled study. *Clinical rehabilitation* 2012; 26(11): 974-81.
154. Hazneci B, Tan AK, Ozdem T, Dincer K, Kalyon TA. The effects of transcutaneous electroneurostimulation and ultrasound in the treatment of reflex sympathetic dystrophy syndrome. [Turkish]. *Turkiye Fiziksel Tip ve Rehabilitasyon Dergisi* 2005; 51(3): 83-9.
155. Herrera-Lasso I, Mobarak L, Fernández-Dominguez L, Cardiel MH, Alarcón-Segovia D. Comparative Effectiveness of Packages of Treatment Including Ultrasound or Transcutaneous Electrical Nerve Stimulation in Painful Shoulder Syndrome. *Physiotherapy* 1993; 79(4): 251-3.
156. Hershman M CW, Swift R, Reilly D, Gompertz H, Wood C. Transcutaneous electrical nerve stimulation as adjunctive analgesia in patients undergoing abdominal procedures. *Surg Res Commun* 1989; 7: 65-9.
157. Hokenek NM, Erdogan MO, Hokenek UD, Algin A, Tekyol D, Seyhan AU. Treatment of migraine attacks by transcutaneous electrical nerve stimulation in emergency department: A randomize controlled trial. *American Journal of Emergency Medicine* 2020.
158. Hou CR, Tsai LC, Cheng KF, Chung KC, Hong C. Immediate effects of various physical therapeutic modalities on cervical myofascial pain and trigger-point sensitivity. *Archives of physical medicine and rehabilitation* 2002; 83(10): 1406-14.
159. Hruby G, Ames C, Chen C, et al. Assessment of efficacy of transcutaneous electrical nerve stimulation for pain management during office-based flexible cystoscopy. *Urology* 2006; 67(5): 914-7.
160. Hsieh RL, Lee WC. One-shot percutaneous electrical nerve stimulation vs. transcutaneous electrical nerve stimulation for low back pain: comparison of therapeutic effects. *American journal of physical medicine & rehabilitation* 2002; 81(11): 838-43.
161. Hsueh TC, Cheng PT, Kuan TS, Hong CZ. The immediate effectiveness of electrical nerve stimulation and electrical muscle stimulation on myofascial trigger points. *American journal of physical medicine & rehabilitation* 1997; 76(6): 471-6.
162. Hughes S, Dailey P, Partridge C. Transcutaneous electrical nerve stimulation for labour analgesia. *Anesthesia and analgesia* 1988; 67: S99.
163. Husch HH, Watte G, Zanon M, et al. Effects of Transcutaneous Electrical Nerve Stimulation on Pain, Pulmonary Function, and Respiratory Muscle Strength After Posterolateral Thoracotomy: A Randomized Controlled Trial. *Lung* 2020; 198(2): 345-53.
164. Ilhanli I. Conventional, Acupuncture-Like or Brief-Intense: Is There Any Difference Between TENS Modalities According to Outcomes of Chronic Low Back Pain with Lumbar Disc Herniation. *Clinical Medicine Research* 2015; 4(5): 143-50.
165. Inal EE, Eroglu P, Yucel SH, Orhan H. Which is the Appropriate Frequency of TENS in Managing Knee Osteoarthritis: High or Low Frequency? *Journal of Clinical and Analytical Medicine* 2016; 7(3): 339-44.
166. Isik M, Ugur M, Yakisan RS, Sari T, Yilmaz N. Comparison of the effectiveness of medicinal leech and TENS therapy in the treatment of primary osteoarthritis of the knee : A randomized controlled trial. *Zeitschrift fur Rheumatologie* 2017; 76(9): 798-805.
167. Jaafarpour M, Khani A, Javadifar N, Taghinejad H, Mahmoudi R, Saadipour KH. The analgesic effect of transcutaneous electrical nerve stimulation (TENS) on caesarean under spinal anaesthesia. *Journal of Clinical and Diagnostic Research* 2008; 2(3): 815-9.
168. Jamison RN, Wan L, Edwards RR, Mei A, Ross EL. Outcome of a High-Frequency Transcutaneous Electrical Nerve Stimulator (hfTENS) Device for Low Back Pain: A Randomized Controlled Trial. *Pain Practice* 2019; 19(5): 466-75.
169. Jarzem P, Harvey E, Arcaro N, Kaczorowski J. Transcutaneous electrical nerve stimulation (TENS) for short-term treatment of low back pain - randomized double blind crossover study of sham versus conventional TENS. *Journal of Musculoskeletal Pain* 2005; 13(2): 11-7.
170. Jensen JE, Conn RR, Hazelrigg G, Hewett JE. The use of transcutaneous neural stimulation and isokinetic testing in arthroscopic knee surgery. *American journal of sports medicine* 1985; 13(1): 27-33.
171. Jensen H, Zesler R, Christensen T. Transcutaneous electrical nerve stimulation (TNS) for painful osteoarthrosis of the knee. *International journal of rehabilitation research Internationale Zeitschrift fur Rehabilitationsforschung Revue internationale de recherches de readaptation* 1991; 14(4): 356-8.
172. Jones AYM, Hutchinson RC. A comparison of the analgesic effect of transcutaneous electrical nerve stimulation and entonox. *Physiotherapy* 1991; 77(8): 526-30.

## 08\_OL-TABLE1\_IncludedStudies

- 1  
2 173. Kara B, Baskurt F, Acar S, et al. The effect of TENS on pain, function, depression, and analgesic consumption in the early postoperative period with spinal surgery patients. *Turkish neurosurgery* 2011; 21(4): 618-24.
- 3  
4 174. Kararmaz A, Kaya S, Karaman H, Turhanoglu S. Effect of the frequency of transcutaneous electrical nerve stimulation on analgesia during extracorporeal shock wave lithotripsy. *Urological research* 2004; 32(6): 411-5.
- 5  
6 175. Kayman-Kose S, Arioz DT, Toktas H, et al. Transcutaneous electrical nerve stimulation (TENS) for pain control after vaginal delivery and cesarean section. *The journal of maternal-fetal & neonatal medicine : the official journal of the European Association of Perinatal Medicine, the Federation of Asia and Oceania Perinatal Societies, the International Society of Perinatal Obstet* 2014; 27(15): 1572-5.
- 7  
8 176. Keskin EA, Onur O, Keskin HL, Gumus, II, Kafali H, Turhan N. Transcutaneous electrical nerve stimulation improves low back pain during pregnancy. *Gynecologic and obstetric investigation* 2012; 74(1): 76-83.
- 9  
10 177. Kibar S, Konak HE, V SA, DoğAnay ErdoğAn B, EvcİK D. The Effectiveness of Combined Transcutaneous Electrical Nerve Stimulation and Interferential Current Therapy on Chronic Low Back Pain: A Randomized, Double-Blind, Sham-Controlled Study. *Journal of Physical Medicine & Rehabilitation Sciences / Fiziksel Tıp ve Rehabilitasyon Bilimleri Dergisi* 2020; 23(1): 32-40.
- 11  
12 178. Kim S, Park K, Son B, Jeon Y. The Effect of Transcutaneous Electrical Nerve Stimulation on Pain During Venous Cannulation. *Current Therapeutic Research* 2012; 73(4/5): 134-9.
- 13  
14 179. Kim D-H, Yoon KB, Yoon DM, et al. Comparison of NSAID Patch Given as Monotherapy and NSAID Patch in Combination with Transcutaneous Electric Nerve Stimulation, a Heating Pad, or Topical Capsaicin in the Treatment of Patients with Myofascial Pain Syndrome of the Upper Trapezius: A Pilot Study. *Pain Medicine* 2014; 15(12): 2128-38.
- 15  
16 180. Kirupa K, Divya Mary SM, Vaishnavi G, Nithya Nisha R, Rennie Mercy J, Jaiganesh G. A comparative study of ultrasound therapy and transcutaneous electrical nerve stimulation in reducing pain for temporomandibular joint disorder. *Drug invention today* 2019; 12(3): 515-7.
- 17  
18 181. Nobel R, Radiünz V, Carraro TEJT, Contexto-Enfermagem. Use of transcutaneous electric nerve stimulation for pain relief in labour: a possible way to care the child-bearer. 2005; 14(2): 229-36.
- 19  
20 182. Koca I, Boyaci A, Tutoglu A, Ucar M, Kocaturk O. Assessment of the effectiveness of interferential current therapy and TENS in the management of carpal tunnel syndrome: a randomized controlled study. *Rheumatology international* 2014; 34(12): 1639-45.
- 21  
22 183. Kofotolis ND, Vlachopoulos SP, Kellis E. Sequentially allocated clinical trial of rhythmic stabilization exercises and TENS in women with chronic low back pain. *Clinical rehabilitation* 2008; 22(2): 99-111.
- 23  
24 184. Koke AJ, Schouten JS, Lamerichs-Geelen MJ, et al. Pain reducing effect of three types of transcutaneous electrical nerve stimulation in patients with chronic pain: a randomized crossover trial. *Pain* 2004; 108(1-2): 36-42.
- 25  
26 185. Korkmaz OK, Capaci K, Eyigor C, Eyigor S. Pulsed radiofrequency versus conventional transcutaneous electrical nerve stimulation in painful shoulder: a prospective, randomized study. *Clinical rehabilitation* 2010; 24(11): 1000-8.
- 27  
28 186. Kumar S, Raje A. Effect of progressive muscular relaxation exercises versus transcutaneous electrical nerve stimulation on tension headache: A comparative study. *Hong Kong Physiotherapy Journal* 2014; 32(2): 86-91.
- 29  
30 187. Labrecque M, Nouwen A, Bergeron M, Rancourt JF. A randomized controlled trial of nonpharmacologic approaches for relief of low back pain during labor. *The Journal of family practice* 1999; 48(4): 259-63.
- 31  
32 188. Laitinen J, Nuutinen L. Failure of transcutaneous electrical nerve stimulation and indomethacin to reduce opiate requirement following cholecystectomy. *Acta anaesthesiologica Scandinavica* 1991; 35(8): 700-5.
- 33  
34 189. Lang T, Barker R, Steinlechner B, et al. TENS relieves acute posttraumatic hip pain during emergency transport. *The Journal of trauma* 2007; 62(1): 184-8; discussion 8.
- 35  
36 190. Langley GB, Sheppard H, Johnson M, Wigley RD. The analgesic effects of transcutaneous electrical nerve stimulation and placebo in chronic pain patients. A double-blind non-crossover comparison. *Rheumatology international* 1984; 4(3): 119-23.
- 37  
38 191. Lauretti GR, Chubaci EF, Mattos AL. Efficacy of the use of two simultaneously TENS devices for fibromyalgia pain. *Rheumatology international* 2013; 33(8): 2117-22.
- 39  
40 192. Lauretti GR, Oliveira R, Parada F, Mattos AL. The New Portable Transcutaneous Electrical Nerve Stimulation Device Was Efficacious in the Control of Primary Dysmenorrhea Cramp Pain. *Neuromodulation : journal of the International Neuromodulation Society* 2015; 18(6): 522-6; discussion -7.
- 41  
42 193. Law PP, Cheing GL. Optimal stimulation frequency of transcutaneous electrical nerve stimulation on people with knee osteoarthritis. *Journal of rehabilitation medicine* 2004; 36(5): 220-5.



08\_OL-TABLE1\_IncludedStudies

- 1  
2 194. Law PPW, Cheing GLY, Tsui AYY. Does transcutaneous electrical nerve stimulation improve the physical performance of people with knee osteoarthritis? *Journal of Clinical Rheumatology* 2004; 10(6): 295-9.
- 3  
4 195. Leandri M, Parodi CI, Corrieri N, Rigardo S. Comparison of TENS treatments in hemiplegic shoulder pain. *Scandinavian journal of rehabilitation medicine* 1990; 22(2): 69-71.
- 5 196. Lee E, Chung I, Lee J, Lam P, Chin R. The role of transcutaneous electrical nerve stimulation in management of labour in obstetric patients. *Asia Oceania J Obstet Gynaecol* 1990; 16(3): 247-54.
- 6  
7 197. Lee CH, Lee TY, Her JS, Liao WL, Hsieh CL. Single-Blinded, Randomized Preliminary Study Evaluating the Effect of Transcutaneous Electrical Nerve Stimulation on Postoperative Pain in Patients with Colles' Fracture. *Journal of alternative and complementary medicine (New York, NY)* 2015; 21(12): 754-8.
- 8 198. Lee JE, Anderson CM, Perkhounkova Y, Sleeuwenhoek BM, Louison RR. Transcutaneous Electrical Nerve Stimulation Reduces Resting Pain in Head and Neck Cancer Patients A Randomized and Placebo-Controlled Double-Blind Pilot Study. *Cancer Nursing* 2019; 42(3): 218-28.
- 9 199. Leo KC, Dostal WF, Bossen DG, Eldridge VL, Fairchild ML, Evans RE. Effect of transcutaneous electrical nerve stimulation characteristics on clinical pain. *Physical therapy* 1986; 66(2): 200-5.
- 10 200. Leonard G, Cloutier C, Marchand S. Reduced analgesic effect of acupuncture-like TENS but not conventional TENS in opioid-treated patients. *The journal of pain : official journal of the American Pain Society* 2011; 12(2): 213-21.
- 11 201. Lewers D, Clelland J, Jackson J, Varner R, Bergman J. Transcutaneous electrical nerve stimulation in the relief of primary dysmenorrhea. *Physical therapy* 1989; 69(1): 3-9.
- 12 202. Lewis D, Lewis B, Sturrock R. Transcutaneous electrical nerve stimulation in osteoarthritis: a therapeutic alternative? *Annals of the rheumatic diseases* 1984; 43(1): 47-9.
- 13 203. Lewis B, Lewis D, Cumming G. The comparative analgesic efficacy of transcutaneous electrical nerve stimulation and a non-steroidal anti-inflammatory drug for painful osteoarthritis. *British journal of rheumatology* 1994; 33(5): 455-60.
- 14 204. Likar R, Molnar M, Pipam W, et al. Postoperative transcutaneous electrical nerve stimulation (TENS) in shoulder surgery (randomized, double blind, placebo controlled pilot trial). [German]. *Schmerz (Berlin, Germany)* 2001; 15(3): 158-63.
- 15 205. Lim AT, Edis G, Kranz H, Mendelson G, Selwood T, Scott DF. Postoperative pain control: contribution of psychological factors and transcutaneous electrical stimulation. *Pain* 1983; 17(2): 179-88.
- 16 206. Lima PMB, Farias RTFB, Carvalho ACA, da Silva PNC, Filho NAF, de Brito RF. Transcutaneous electrical nerve stimulation after coronary artery bypass graft surgery. *Brazilian Journal of Cardiovascular Surgery* 2011; 26(4): 591-6.
- 17 207. Limoges MF, Rickabaugh B. Evaluation of TENS during screening flexible sigmoidoscopy. *Gastroenterology nursing : the official journal of the Society of Gastroenterology Nurses and Associates* 2004; 27(2): 61-8.
- 18 208. Lin ML, Luo YJ, Hsu YM, et al. Randomized controlled trial Comparing of Analgesic Effectiveness of TPRF and TENs in Clinical and Endocrinological Changes for Chronic Shoulder Pain; 2015.
- 19 209. Lin M-L, Chiu H-W, Shih Z-M, et al. Two Transcutaneous Stimulation Techniques in Shoulder Pain: Transcutaneous Pulsed Radiofrequency (TPRF) versus Transcutaneous Electrical Nerve Stimulation (TENS): A Comparative Pilot Study. *Pain research & management* 2019; 2019: 2823401.
- 20 210. Linde C, Isacsson G, Jonsson BG. Outcome of 6-week treatment with transcutaneous electric nerve stimulation compared with splint on symptomatic temporomandibular joint disk displacement without reduction. *Acta odontologica scandinavica* 1995; 53(2): 92-8.
- 21 211. Linn SL, Granat MH, Lees KR. Prevention of shoulder subluxation after stroke with electrical stimulation. *Stroke* 1999; 30(5): 963-8.
- 22 212. Lison JF, Amer-Cuenca JJ, Piquer-Marti S, Benavent-Caballer V, Bivia-Roig G, Marin-Buck A. Transcutaneous Nerve Stimulation for Pain Relief During Office Hysteroscopy: A Randomized Controlled Trial. *Obstetrics and gynecology* 2017; 129(2): 363-70.
- 23 213. Liu YC, Liao WS, Lien IN. Effect of transcutaneous electrical nerve stimulation for post-thoracotomy pain. *Taiwan I Hsueh Hui Tsa Chih* 1985; 84(7): 801-9.
- 24 214. Liu Y, Dong Z, Wang R, et al. Migraine Prevention Using Different Frequencies of Transcutaneous Occipital Nerve Stimulation: A Randomized Controlled Trial. *The journal of pain : official journal of the American Pain Society* 2017; 18(8): 1006-15.
- 25 215. Lofgren M, Norrbrink C. Pain relief in women with fibromyalgia: a cross-over study of superficial warmth stimulation and transcutaneous electrical nerve stimulation. *Journal of rehabilitation medicine* 2009; 41(7): 557-62.
- 26 216. Luchesa CA, Greca FH, Guarita-Souza LC, Luiz Verde dos Santos J, Aquim EE. The role of electroanalgesia in patients undergoing coronary artery bypass surgery. [Portuguese]. *Brazilian Journal of Cardiovascular Surgery* 2009; 24(3): 391-6.
- 27  
28  
29  
30  
31  
32  
33  
34  
35  
36  
37  
38  
39  
40  
41  
42  
43  
44  
45  
46

## 08\_OL-TABLE1\_IncludedStudies

- 1  
2 217. Lundeberg T. A comparative study of the pain alleviating effect of vibratory stimulation, transcutaneous electrical nerve stimulation, electroacupuncture and placebo. *The American*  
3 *journal of Chinese medicine* 1984; 12(1-4): 72-9.
- 4 218. Lundeberg T, Bondesson L, Lundstrom V. Relief of primary dysmenorrhea by transcutaneous electrical nerve stimulation. *Acta obstetrica et gynecologica Scandinavica* 1985; 64(6):  
5 491-7.
- 6 219. Machado AFP, Perracini MR, Rampazo ÉP, Driusso P, Liebano RE. Effects of thermotherapy and transcutaneous electrical nerve stimulation on patients with primary dysmenorrhea:  
7 A randomized, placebo-controlled, double-blind clinical trial. *Complementary therapies in medicine* 2019; 47: N.PAG.
- 8 220. Machin D, Lewith GT, Wylson S. Pain measurement in randomized clinical trials. A comparison of two pain scales. *Clinical Journal of Pain* 1988; 4(3): 161-8.
- 9 221. Mahure SA, Rokito AS, Kwon YW. Transcutaneous electrical nerve stimulation for postoperative pain relief after arthroscopic rotator cuff repair: a prospective double-blinded  
10 randomized trial. *Journal of shoulder and elbow surgery* 2017; 26(9): 1508-13.
- 11 222. Manigandan JB, Ganesh GS, Pattnaik M, Mohanty P. Effect of electrical stimulation to long head of biceps in reducing gleno humeral subluxation after stroke. *NeuroRehabilitation*  
12 2014; 34(2): 245-52.
- 13 223. Mannheimer C, Carlsson C. The analgesic effect of transcutaneous electrical nerve stimulation (TENS) in patients with rheumatoid arthritis. A comparative study of different pulse  
14 patterns. *Pain* 1979; 6(3): 329-34.
- 15 224. Mannheimer J, Whalen E. The efficacy of transcutaneous electric nerve stimulation in dysmenorrhea. *Clinical Journal of Pain* 1985; 1: 75-83.
- 16 225. Mannheimer C, Lund S, Carlsson CA. The effect of transcutaneous electrical nerve stimulation (TENS) on joint pain in patients with rheumatoid arthritis. *Scandinavian journal of*  
17 *rheumatology* 1978; 7(1): 13-6.
- 18 226. Mannheimer C, Carlsson C, Emanuelsson H, Vedin A, Waagstein F, Wilhelmsson C. The effects of transcutaneous electrical nerve stimulation in patients with severe angina pectoris.  
19 *Circulation* 1985; 71(2): 308-16.
- 20 227. Mansourian A, Pourshahidi S, Sadrzadeh-Afshar MS, Ebrahimi H. A Comparative Study of Low-Level Laser Therapy and Transcutaneous Electrical Nerve Stimulation as an Adjunct  
21 to Pharmaceutical Therapy for Myofascial Pain Dysfunction Syndrome: A Randomized Clinical Trial. *Frontiers in dentistry* 2019; 16(4): 256-64.
- 22 228. Mansuri B, Torabinezhad F, Jamshidi AA, Dabirmoghaddam P, Vasaghi-Gharamaleki B, Ghelichi L. Application of High-Frequency Transcutaneous Electrical Nerve Stimulation in  
23 Muscle Tension Dysphonia Patients With the Pain Complaint: The Immediate Effect. *Journal of Voice* 2019.
- 24 229. Mansuri B, Torabinezhad F, Jamshidi AA, Dabirmoghaddam P, Vasaghi-Gharamaleki B, Ghelichi L. Transcutaneous Electrical Nerve Stimulation Combined With Voice Therapy in  
25 Women With Muscle Tension Dysphonia. *Journal of Voice* 2020; 34(3): 490.e111-.e21.
- 26 230. Marchand S, Charest J, Li J, Chenard J, Lavignolle B, Laurencelle L. Is TENS purely a placebo effect? A controlled study on chronic low back pain [see comments]. *Pain* 1993; 54(1):  
27 99-106.
- 28 231. Mascarin NC, Vancini RL, Andrade ML, Magalhaes Ede P, de Lira CA, Coimbra IB. Effects of kinesiotherapy, ultrasound and electrotherapy in management of bilateral knee  
29 osteoarthritis: prospective clinical trial. *BMC musculoskeletal disorders* 2012; 13: 182.
- 30 232. McCallum M, Glynn C, Moore R, Lammer P, Phillips A. Transcutaneous electrical nerve stimulation in the management of acute postoperative pain. *British journal of anaesthesia*  
31 1988; 61(3): 308-12.
- 32 233. Melzack R, Vetere P, Finch L. Transcutaneous electrical nerve stimulation for low back pain. A comparison of TENS and massage for pain and range of motion. *Physical therapy*  
33 1983; 63(4): 489-93.
- 34 234. Merrill D. Clinical evaluation of FasTENS, an inexpensive, disposable transcutaneous electrical nerve stimulator designed specifically for postoperative electroanalgesia. *Urology*  
35 1989; 33(1): 27-30.
- 36 235. Miller L, Mattison P, Paul L, Wood L. The effects of transcutaneous electrical nerve stimulation (TENS) on spasticity in multiple sclerosis. *Multiple sclerosis (Houndmills,*  
37 *Basingstoke, England)* 2007; 13(4): 527-33.
- 38 236. Milsom I, Hedner N, Mannheimer C. A comparative study of the effect of high-intensity transcutaneous nerve stimulation and oral naproxen on intrauterine pressure and menstrual  
39 pain in patients with primary dysmenorrhea. *American journal of obstetrics and gynecology* 1994; 170(1 Pt 1): 123-9.
- 40 237. Moharic M, Marincek C, Vidmar G, Burger H. TRANSCUTANEOUS ELECTRICAL NERVE STIMULATION, PREGABALIN AND THEIR COMBINATION IN PATIENTS  
41 WITH PAINFUL DIABETIC NEUROPATHY: EFFECTS ON PAIN AND QUALITY OF LIFE. *Zdravniski Vestnik-Slovenian Medical Journal* 2009; 78(8): 371-80.
- 42 238. Mondal P, Biswas M, Saha J, Middhya AK. Effect of Trigger Point Injection Vs Ultrasonic Therapy Vs Transcutaneous Electrical Nerve Stimulation in Rehabilitation of Cervical and  
43 Peri-Scapular Myofascial Pain Syndrome- a Randomized Clinical Trial. *Journal of Evolution of Medical and Dental Sciences-Jemds* 2019; 8(7): 430-6.

08\_OL-TABLE1\_IncludedStudies

- 1  
2 239. Moore SR, Shurman J. Combined neuromuscular electrical stimulation and transcutaneous electrical nerve stimulation for treatment of chronic back pain: a double-blind, repeated  
3 measures comparison. *Archives of physical medicine and rehabilitation* 1997; 78(1): 55-60.
- 4 240. Mora B, Giorni E, Dobrovits M, et al. Transcutaneous electrical nerve stimulation: an effective treatment for pain caused by renal colic in emergency care. *The Journal of urology*  
5 2006; 175(5): 1737-41; discussion 41.
- 6 241. Morgan B, Jones AR, Mulcahy KA, Finlay DB, Collett B. Transcutaneous electric nerve stimulation (TENS) during distension shoulder arthrography: a controlled trial. *Pain* 1996;  
7 64(2): 265-7.
- 8 242. Møystad A, Krogstad BS, Larheim TA. Transcutaneous nerve stimulation in a group of patients with rheumatic disease involving the temporomandibular joint. *Journal of prosthetic*  
9 *dentistry* 1990; 64(5): 596-600.
- 10 243. Murray S, Collins PD, James MA. An investigation into the 'carry over' effect of neurostimulation in the treatment of angina pectoris. *International journal of clinical practice* 2004;  
11 58(7): 669-74.
- 12 244. Mutlu B, Paker N, Bugdayci D, Tekdos D, Kesiktaş N. Efficacy of supervised exercise combined with transcutaneous electrical nerve stimulation in women with fibromyalgia: a  
13 prospective controlled study. *Rheumatology international* 2013; 33(3): 649-55.
- 14 245. Nabi BN, Sedighinejad A, Haghighi M, et al. Comparison of transcutaneous electrical nerve stimulation and pulsed radiofrequency sympathectomy for treating painful diabetic  
15 neuropathy. 2015; 5(5).
- 16 246. Nash TP, Williams JD, Machin D. TENS: Does the type of stimulus really matter? *Pain Clinic* 1990; 3(3): 161-8.
- 17 247. Navarathnam RG, Wang IY, Thomas D, Klineberg PL. Evaluation of the transcutaneous electrical nerve stimulator for postoperative analgesia following cardiac surgery. *Anaesthesia*  
18 *and intensive care* 1984; 12(4): 345-50.
- 19 248. Neary J. Transcutaneous electrical nerve stimulation for the relief of post-incisional surgical pain. *AANA J* 1981; 49(2): 151-5.
- 20 249. Neighbours LE, Clelland J, Jackson JR, Bergman J, Orr J. Transcutaneous electrical nerve stimulation for pain relief in primary dysmenorrhea. *The Clinical journal of pain* 1987; 3(1):  
21 17-22.
- 22 250. Nesheim BI. The use of transcutaneous nerve stimulation for pain relief during labor. A controlled clinical study. *Acta obstetrica et gynecologica Scandinavica* 1981; 60(1): 13-6.
- 23 251. Neumark J, Pauser G, Scherzer W. Pain relief in childbirth; an analysis of the analgesic effects of transcutaneous nerve stimulation (TNS), pethidine and placebos (author's transl).  
24 *Praktische anesthesie, wiederbelebung und intensivtherapie* 1978; 13(1): 13-20.
- 25 252. Ng MM, Leung MC, Poon DM. The effects of electro-acupuncture and transcutaneous electrical nerve stimulation on patients with painful osteoarthritic knees: a randomized  
26 controlled trial with follow-up evaluation. *Journal of alternative and complementary medicine (New York, NY)* 2003; 9(5): 641-9.
- 27 253. Nordemar R, Thorner C. Treatment of acute cervical pain - A comparative group study. *Pain* 1981; 10(1): 93-101.
- 28 254. Norrbrink C. Transcutaneous electrical nerve stimulation for treatment of spinal cord injury neuropathic pain. *Journal of rehabilitation research and development* 2009; 46(1): 85-93.
- 29 255. Olsén MF, Elden H, Janson ED, Lilja H, Stener-Victorin E. A comparison of high- versus low-intensity, high-frequency transcutaneous electric nerve stimulation for painful  
30 postpartum uterine contractions. *Acta obstetrica et gynecologica Scandinavica* 2007; 86(3): 310-4.
- 31 256. Fagevik Olsen M, Bjordahl S, Stahl A, Borjesson S, Sundemo A, Gutke A. Effects of high-intensity high-frequency transcutaneous electric nerve stimulation in primary  
32 dysmenorrhea-a randomised cross-over pilot study. *European Journal of Physiotherapy* 2019.
- 33 257. Oncel M, Sencan S, Yildiz H, Kurt N. Transcutaneous electrical nerve stimulation for pain management in patients with uncomplicated minor rib fractures. *European journal of*  
34 *cardio-thoracic surgery : official journal of the European Association for Cardio-thoracic Surgery* 2002; 22(1): 13-7.
- 35 258. Oosterhof J, De Boo TM, Oostendorp RA, Wilder-Smith OH, Crul BJ. Outcome of transcutaneous electrical nerve stimulation in chronic pain: short-term results of a double-blind,  
36 randomised, placebo-controlled trial. *The journal of headache and pain* 2006; 7(4): 196-205.
- 37 259. Oosterhof J, Samwel HJ, de Boo TM, Wilder-Smith OH, Oostendorp RA, Crul BJ. Predicting outcome of TENS in chronic pain: a prospective, randomized, placebo controlled trial.  
38 *Pain* 2008; 136(1-2): 11-20.
- 39 260. Oosterhof J, Wilder-Smith OH, de Boo T, Oostendorp RA, Crul BJ. The long-term outcome of transcutaneous electrical nerve stimulation in the treatment for patients with chronic  
40 pain: a randomized, placebo-controlled trial. *Pain practice : the official journal of World Institute of Pain* 2012; 12(7): 513-22.
- 41 261. Oosterhof J, Wilder-Smith OH, Oostendorp RA, Crul BJ. Different mechanisms for the short-term effects of real versus sham transcutaneous electrical nerve stimulation (TENS) in  
42 patients with chronic pain: a pilot study. *Journal of pain & palliative care pharmacotherapy* 2012; 26(1): 5-12.

## 08\_OL-TABLE1\_IncludedStudies

- 1  
2 262. Ordog GJ. Transcutaneous electrical nerve stimulation versus oral analgesic: a randomized double-blind controlled study in acute traumatic pain. *The American journal of emergency medicine* 1987; 5(1): 6-10.
- 3  
4 263. Ozkaraoglu DK, Tarakci D, Algun ZC. Comparison of two different electrotherapy methods in low back pain treatment. *Journal of Back & Musculoskeletal Rehabilitation* 2020; 33(2): 193-9.
- 5  
6 264. Ozkul C, Kilinc M, Yildirim SA, Topcuoglu EY, Akyuz M. Effects of visual illusion and transcutaneous electrical nerve stimulation on neuropathic pain in patients with spinal cord injury: A randomised controlled cross-over trial. *Journal of back and musculoskeletal rehabilitation* 2015; 28(4): 709-19.
- 7  
8 265. Oztas B, Iyigun E. The effects of two different electrical stimulation methods on the pain intensity of the patients who had undergone abdominal surgery with a midline incision: Randomized Controlled Clinical Trial. *Contemporary nurse* 2019: 1-21.
- 9  
10 266. Ozturk NK, Baki ED, Kavakli AS, et al. Comparison of Transcutaneous Electrical Nerve Stimulation and Parasternal Block for Postoperative Pain Management after Cardiac Surgery. *Pain research & management* 2016; 2016: 4261949.
- 11  
12 267. Padma, Prasanna A, Urala. Transcutaneous electrical nerve stimulation and labor pain. *Bahrain Medical Bulletin* 2000; 22(1): 13-7.
- 13  
14 268. Paker N, Tekdos D, Kesiktas N, Soy D. Comparison of the therapeutic efficacy of TENS versus intra-articular hyaluronic acid injection in patients with knee osteoarthritis: a prospective randomized study. *Advances in therapy* 2006; 23(2): 342-53.
- 15  
16 269. Palmer S, Domaille M, Cramp F, et al. Transcutaneous electrical nerve stimulation as an adjunct to education and exercise for knee osteoarthritis: a randomized controlled trial. *Arthritis care & research* 2014; 66(3): 387-94.
- 17  
18 270. Pan P, Chou C, Chiou H, Ma H, Lee H, Chan R. Extracorporeal shock wave therapy for chronic calcific tendinitis of the shoulders: a functional and sonographic study. *Archives of Physical Medicine & Rehabilitation* 2003; 84(7): 988-93.
- 19  
20 271. Park C, Choi JB, Lee YS, et al. The effect of intra-operative transcutaneous electrical nerve stimulation on posterior neck pain following thyroidectomy. *Anaesthesia* 2015; 70(4): 434-9.
- 21  
22 272. Patil SR, Aileni KR. Effect of transcutaneous electrical nerve stimulation versus home exercise programme in management of temporomandibular joint disorder. *Journal of Clinical and Diagnostic Research* 2017; 11(12): ZC19-ZC22.
- 23  
24 273. Peacock KS, Stoerkel E, Libretto S, et al. A randomized trial comparing the Tennant Biomodulator to transcutaneous electrical nerve stimulation and traditional Chinese acupuncture for the treatment of chronic pain in military service members. *Military Medical Research* 2019; 6(1): 37.
- 25  
26 274. Pietrosimone BG, Hart JM, Saliba SA, Hertel J, Ingersoll CD. Immediate effects of transcutaneous electrical nerve stimulation and focal knee joint cooling on quadriceps activation. *Medicine and science in sports and exercise* 2009; 41(6): 1175-81.
- 27  
28 275. Pietrosimone BG, Saliba SA, Hart JM, Hertel J, Kerrigan DC, Ingersoll CD. Effects of transcutaneous electrical nerve stimulation and therapeutic exercise on quadriceps activation in people with tibiofemoral osteoarthritis. *The Journal of orthopaedic and sports physical therapy* 2011; 41(1): 4-12.
- 29  
30 276. Pietrosimone BG, Saliba SA, Hart JM, Hertel J, Kerrigan DC, Ingersoll CD. Effects of disinhibitory transcutaneous electrical nerve stimulation and therapeutic exercise on sagittal plane peak knee kinematics and kinetics in people with knee osteoarthritis during gait: a randomized controlled trial. *Clinical rehabilitation* 2010; 24(12): 1091-101.
- 31  
32 277. Pietrosimone B, Luc-Harkey BA, Harkey MS, et al. Using TENS to Enhance Therapeutic Exercise in Individuals with Knee Osteoarthritis. *Medicine and science in sports and exercise* 2020.
- 33  
34 278. Pike PM. Transcutaneous electrical stimulation. Its use in the management of postoperative pain. *Anaesthesia* 1978; 33(2): 165-71.
- 35  
36 279. Pitangui AC, de Sousa L, Gomes FA, Ferreira CH, Nakano AM. High-frequency TENS in post-episiotomy pain relief in primiparous puerpere: a randomized, controlled trial. *The journal of obstetrics and gynaecology research* 2012; 38(7): 980-7.
- 37  
38 280. Pitangui AC, Araújo RC, Bezerra MJ, Ribeiro CO, Nakano AM. Low and high-frequency TENS in post-episiotomy pain relief: a randomized, double-blind clinical trial. *Brazilian journal of physical therapy* 2014; 18(1): 72-8.
- 39  
40 281. Platon B, Andrell P, Raner C, Rudolph M, Dvoretzky A, Mannheimer C. High-frequency, high-intensity transcutaneous electrical nerve stimulation as treatment of pain after surgical abortion. *Pain* 2010; 148(1): 114-9.
- 41  
42 282. Platon B, Mannheimer C, Andrell P. Effects of high-frequency, high-intensity transcutaneous electrical nerve stimulation versus intravenous opioids for pain relief after gynecologic laparoscopic surgery: a randomized controlled study. *Korean Journal of Anesthesiology* 2018; 71(2): 149-56.
- 43  
44 283. Prabhakar R, Ramteke G. Cervical Spinal Mobilization Versus TENS in the Management of Cervical Radiculopathy: A Comparative, Experimental, Randomized controlled trial. *Indian Journal of Physiotherapy and Occupational Therapy* 2011; 5(2): 128-33.
- 45  
46



08\_OL-TABLE1\_IncludedStudies

- 1  
2 284. Presser M, Birkhan J, Adler R, Hanani A, Eisenberg E. Transcutaneous electrical nerve stimulation (TENS) during epidural steroids injection: a randomized controlled trial. *Pain Clinic* 2000; 12(2): 77-80.
- 3  
4 285. Rainov NG, Heidecke V, Albertz C, Burkert W. Transcutaneous electrical nerve stimulation (TENS) for acute postoperative pain after spinal surgery. *European Journal of Pain* 1994; 15(2-3): 44-9.
- 5  
6 286. Rajfur J, Pasternok M, Rajfur K, et al. Efficacy of Selected Electrical Therapies on Chronic Low Back Pain: a Comparative Clinical Pilot Study. *Medical science monitor* 2017; 23: 85-100.
- 7  
8 287. Rajpurohit B, Khatri SM, Metgud D, Bagewadi A. Effectiveness of transcutaneous electrical nerve stimulation and microcurrent electrical nerve stimulation in bruxism associated with masticatory muscle pain--a comparative study. *Indian journal of dental research : official publication of Indian Society for Dental Research* 2010; 21(1): 104-6.
- 9  
10 288. Rakel B, Frantz R. Effectiveness of transcutaneous electrical nerve stimulation on postoperative pain with movement. *The journal of pain : official journal of the American Pain Society* 2003; 4(8): 455-64.
- 11  
12 289. Rakel BA, Zimmerman MB, Geasland K, et al. Transcutaneous electrical nerve stimulation for the control of pain during rehabilitation after total knee arthroplasty: A randomized, blinded, placebo-controlled trial. *Pain* 2014; 155(12): 2599-611.
- 13  
14 290. Ramanathan D, Saleh A, Klika AK, Higuera CA, Barsoum WK. The Use of Transcutaneous Electrical Nerve Stimulation After Total Knee Arthroplasty: A Prospective Randomized Controlled Trial. *Surgical technology international* 2017; 30: 425-34.
- 15  
16 291. Ramos LAV, Callegari B, Franca FJR, et al. Comparison Between Transcutaneous Electrical Nerve Stimulation and Stabilization Exercises in Fatigue and Transversus Abdominis Activation in Patients With Lumbar Disk Herniation: A Randomized Study. *Journal of manipulative and physiological therapeutics* 2018; 41(4): 323-31.
- 17  
18 292. Rani P, Kalyani V, Goyal T, Yadav R, Mishra R. Effect of Transcutaneous Electrical Nerve Stimulation Therapy on Pain and Functional Disability Level among Patients with Rotator Cuff Disease- a Randomized Controlled Trial. *International Journal of Physiotherapy* 2020; 7(1): 7-13.
- 19  
20 293. Ratajczak B, Hawrylak A, Demidaś A, Kuciel-Lewandowska J, Boerner E. Effectiveness of diadynamic currents and transcutaneous electrical nerve stimulation in disc disease lumbar part of spine. *Journal of Back & Musculoskeletal Rehabilitation* 2011; 24(3): 155-9.
- 21  
22 294. Rawat B, Genz A, Fache JS, Ong M, Coldman AJ, Burhenne HJ. Effectiveness of transcutaneous electrical nerve stimulation (TENS) for analgesia during biliary lithotripsy. *Invest Radiol* 1991; 26(10): 866-9.
- 23  
24 295. Renovato França FJ, Nogueira Burke T, Oliveira Magalhães M, et al. Motor Control Training Compared With Transcutaneous Electrical Nerve Stimulation in Patients With Disc Herniation With Associated Radiculopathy: A Randomized Controlled Trial. *American journal of physical medicine & rehabilitation* 2019; 98(3): 207-14.
- 25  
26 296. Reuss R, Cronen P, Abplanalp L. Transcutaneous electrical nerve stimulation for pain control after cholecystectomy: lack of expected benefits. *Southern medical journal* 1988; 81(11): 1361-3.
- 27  
28 297. Revadkar MT, Bhojwani TM. Comparison of the Effectiveness of Transcutaneous Electrical Nerve Stimulation (Tens) Vs. Interferential Therapy (Ift) for Relief of Pain in Primary Dysmenorrhea. *International Journal of Physiotherapy* 2019; 6(6): 263-7.
- 29  
30 298. Ringel G, Taubert K. Zur effektivitat der transkutanen elektrischen nervenstimulation bei migrane (The efficacy of transcutaneous nerve stimulation in migraine) [German]. *Zeitschrift fur Physiotherapie* 1991 Jan;43(1):8-11 1991.
- 31  
32 299. Robb KA, Newham DJ, Williams JE. Transcutaneous electrical nerve stimulation vs. transcutaneous spinal electroanalgesia for chronic pain associated with breast cancer treatments. *Journal of pain and symptom management* 2007; 33(4): 410-9.
- 33  
34 300. Robinson R, Darlow S, Wright SJ, et al. Is transcutaneous electrical nerve stimulation an effective analgesia during colonoscopy? *Postgraduate medical journal* 2001; 77(909): 445-6.
- 35  
36 301. Roche PA, Gijbsbers K, Belch JJ, Forbes CD. Modification of haemophilic haemorrhage pain by transcutaneous electrical nerve stimulation. *Pain* 1985; 21(1): 43-8.
- 37  
38 302. Rooney SM, Jain S, Goldiner PL. Effect of transcutaneous nervous stimulation on postoperative pain after thoracotomy. *Anesthesia and analgesia* 1983; 62(11): 1010-2.
- 39  
40 303. Rosenberg M, Curtis L, Bourke D. Transcutaneous electrical nerve stimulation for the relief of postoperative pain. *Pain* 1978; 5(2): 129-33.
- 41  
42 304. Rutgers MJ, Van-Romunde L, Osman P. A small randomised comparative trial of acupuncture verses transcutaneous electrical neurostimulation in postherpetic neuralgia. *Pain Clinic* 1988; 2: 87-9.
- 43  
44 305. Sadala AY, Machado AFP, Liebano RE. Effects of transcutaneous electrical nerve stimulation on pain intensity during application of carboxytherapy in patients with cellulite: A randomized placebo-controlled trial. *Journal of cosmetic dermatology* 2018; 17(6): 1175-81.
- 45  
46 306. Sahin N, Albayrak I, Ugurlu H. Effect of different transcutaneous electrical stimulation modalities on cervical myofascial pain syndrome. *Journal of Musculoskeletal Pain* 2011; 19(1): 18-23.

08\_OL-TABLE1\_IncludedStudies

- 1  
2 307. Samadzadeh S, Rezavand N, Yari M, Rezaei M, Faizmahdavi H, Hematti M. Comparison of Entonox and Transcutaneous Electrical Nerve Stimulation (TENS) in labor pain. *Journal of Medical and Biomedical Sciences* 2017; 6(2): 11-6.
- 3  
4 308. Sangtong K, Chupinijrobkob C, Putthakumnerd W, Kuptniratsaikul V. Does adding transcutaneous electrical nerve stimulation to therapeutic ultrasound affect pain or function in people with osteoarthritis of the knee? A randomized controlled trial. *Clinical rehabilitation* 2019; 33(7): 1197-205.
- 5  
6 309. Santamato A, Notarnicola A, Panza F, et al. SBOTE study: Extracorporeal shock wave therapy versus electrical stimulation after botulinum toxin type a injection for post-stroke spasticity-a prospective randomized trial. *Ultrasound in Medicine and Biology* 2013; 39(2): 283-91.
- 7  
8 310. Santana LS, Gallo RB, Ferreira CH, Duarte G, Quintana SM, Marcolin AC. Transcutaneous electrical nerve stimulation (TENS) reduces pain and postpones the need for pharmacological analgesia during labour: a randomised trial. *Journal of physiotherapy* 2016; 62(1): 29-34.
- 9  
10 311. Saranya B, Ahmed J, Shenoy N, Ongole R, Sujir N, Natarajan S. Comparison of Transcutaneous Electric Nerve Stimulation (TENS) and Microcurrent Nerve Stimulation (MENS) in the Management of Masticatory Muscle Pain: A Comparative Study. *Pain research & management* 2019; 2019: 8291624.
- 11  
12 312. Sayilir S, Yildizgoren MT. The medium-term effects of diadynamic currents in chronic low back pain; TENS versus diadynamic currents: a randomised, follow-up study. *Complementary therapies in clinical practice* 2017; 29: 16-9.
- 13  
14 313. Seo HG, Bang MS, Chung SG, Jung SH, Lee S-U. Effect of Electrical Stimulation on Botulinum Toxin A Therapy in Patients With Chronic Myofascial Pain Syndrome: A 16-Week Randomized Double-Blinded Study. *Archives of Physical Medicine & Rehabilitation* 2013; 94(3): 412-8.
- 15  
16 314. Serry ZMH, Mossa G, Elhabashy H, et al. Transcutaneous nerve stimulation versus aerobic exercise in diabetic neuropathy. *Egyptian Journal of Neurology, Psychiatry and Neurosurgery* 2016; 53(2): 124-9.
- 17  
18 315. Sezen CB, Akboga SA, Celik A, Kalafat CE, Tastepe AI. Transcutaneous electrical nerve stimulation effect on postoperative complications. *Asian cardiovascular & thoracic annals* 2017; 25(4): 276-80.
- 19  
20 316. Shahoei R, Shahghebi S, Rezaei M, Naqshbandi S. The effect of transcutaneous electrical nerve stimulation on the severity of labor pain among nulliparous women: A clinical trial. *Complementary therapies in clinical practice* 2017; 28: 176-80.
- 21  
22 317. Shehab D, Adham N. Comparative effectiveness of ultrasound and transcutaneous electrical stimulation in treatment of periarticular shoulder pain. *Physiother Can* 2000; 52(3): 208-14.
- 23  
24 318. Sherry E, Kitchener P, Smart R. A prospective randomized controlled study of VAX-D and TENS for the treatment of chronic low back pain. *Neurological research* 2001; 23(7): 780-4.
- 25  
26 319. Shimoji K, Takahashi N, Nishio Y, Koyanagi M, Aida S. Pain relief by transcutaneous electric nerve stimulation with bidirectional modulated sine waves in patients with chronic back pain: a randomized, double-blind, sham-controlled study. *Neuromodulation* 2007 Jan;10(1):42-51 2007.
- 27  
28 320. Shimoura K, Iijima H, Suzuki Y, Aoyama T. Immediate Effects of Transcutaneous Electrical Nerve Stimulation on Pain and Physical Performance in Individuals With Preradiographic Knee Osteoarthritis: A Randomized Controlled Trial. *Archives of Physical Medicine & Rehabilitation* 2019; 100(2): 300-.
- 29  
30 321. Shoukry RA, Al-Ansary AM. Transcutaneous Electric Nerve Stimulation (TENS) for pain relief during Extracorporeal Shock-Wave Lithotripsy (ESWL). *Egyptian Journal of Anaesthesia* 2019; 35(1): 65-70.
- 31  
32 322. Siemens W, Boehlke C, Bennett MI, Offner K, Becker G, Gaertner J. Transcutaneous electrical nerve stimulation for advanced cancer pain inpatients in specialist palliative care—a blinded, randomized, sham-controlled pilot cross-over trial. *Supportive Care in Cancer* 2020.
- 33  
34 323. Sikiru L, Shmaila H, Muhammed SA. Transcutaneous electrical nerve stimulation (TENS) in the symptomatic management of chronic prostatitis/chronic pelvic pain syndrome: a placebo-control randomized trial. *International braz j urol : official journal of the Brazilian Society of Urology* 2008; 34(6): 708-13; discussion 14.
- 35  
36 324. Silva MB, de Melo PR, de Oliveira NM, Crema E, Fernandes LF. Analgesic effect of transcutaneous electrical nerve stimulation after laparoscopic cholecystectomy. *American journal of physical medicine & rehabilitation* 2012; 91(8): 652-7.
- 37  
38 325. Silva JG, Gonçalves Santana C, Inocencio KR, Orsini M, Machado S, Bergmann A. Electrocortical Analysis of Patients with Intercostobrachial Pain Treated with TENS after Breast Cancer Surgery. *Journal of Physical Therapy Science* 2014; 26(3): 349-53.
- 39  
40 326. Sim DT. Effectiveness of transcutaneous electrical nerve stimulation following cholecystectomy. *Physiotherapy* 1991; 77(10): 715-22.
- 41  
42 327. Siqueira LTD, Ribeiro VV, Moreira PAM, Brasolotto AG, de Jesus Guirro RR, Alves Silverio KC. Effects of transcutaneous electrical nervous stimulation (TENS) associated with vocal therapy on musculoskeletal pain of women with behavioral dysphonia: A randomized, placebo-controlled double-blind clinical trial. *Journal of communication disorders* 2019; 82: N.PAG.

08\_OL-TABLE1\_IncludedStudies

- 1  
2 328. Sloan JP, Muwanga CL, Waters EA, Dove AF, Dave SH. Multiple rib fractures: transcutaneous nerve stimulation versus conventional analgesia. *The Journal of trauma* 1986; 26(12):  
3 1120-2.
- 4 329. Smania N, Corato E, Fiaschi A, Pietropoli P, Aglioti SM, Tinazzi M. Repetitive magnetic stimulation: a novel therapeutic approach for myofascial pain syndrome. *Journal of*  
5 *neurology* 2005; 252(3): 307-14.
- 6 330. Smedley F, Taube M, Wastell C. Transcutaneous electrical nerve stimulation for pain relief following inguinal hernia repair: a controlled trial. *European surgical research* *Europaische*  
7 *chirurgische Forschung Recherches chirurgicales europeennes* 1988; 20(4): 233-7.
- 8 331. Smith C, Lewith G, Machin D. Preliminary study to establish a controlled method of assessing transcutaneous nerve stimulation as a treatment for the pain caused by osteoarthritis of  
9 the knee. *Physiotherapy* 1983; 69: 266-8.
- 10 332. Smith C, Guralnick M, Gelfand M, Jeans M. The effects of transcutaneous electrical nerve stimulation on post-cesarean pain. *Pain* 1986; 27(2): 181-93.
- 11 333. Sodipo JO, Adedeji SA, Olumide O. Postoperative pain relief by transcutaneous electrical nerve stimulation (TENS). *The American journal of Chinese medicine* 1980; 8(1-2): 190-4.
- 12 334. Solak O, Turna A, Pekcolaklar A, Metin M, Sayar A, Gurses A. Transcutaneous electric nerve stimulation for the treatment of postthoracotomy pain: a randomized prospective study.  
13 *The Thoracic and cardiovascular surgeon* 2007; 55(3): 182-5.
- 14 335. Solak O, Emmiler M, Ela Y, et al. Comparison of continuous and intermittent transcutaneous electrical nerve stimulation in postoperative pain management after coronary artery  
15 bypass grafting: A randomized, placebo-controlled prospective study. *Heart Surgery Forum* 2009; 12(5): E266-E71.
- 16 336. Sonde L, Gip C, Fernaeus SE, Nilsson CG, Viitanen M. Stimulation with low frequency (1.7 Hz) transcutaneous electric nerve stimulation (low-tens) increases motor function of the  
17 post-stroke paretic arm. *Scandinavian journal of rehabilitation medicine* 1998; 30(2): 95-9.
- 18 337. Stepanovic A, Kolsek M, Kersnik J, Erculj V. Prevention of post-herpetic neuralgia using transcutaneous electrical nerve stimulation. *Wiener klinische Wochenschrift* 2015; 127(9-  
19 10): 369-74.
- 20 338. Steptoe P, Bo JO. Pain-relieving effect of transcutaneous nerve stimulation during delivery. A study among primiparas. *Ugeskrift for laeger* 1984; 146(42): 3186-8.
- 21 339. Stratton S, Smith M. Postoperative thoracotomy. Effect of transcutaneous electrical nerve stimulation on forced vital capacity. *Physical therapy* 1980; 60(1): 45-7.
- 22 340. Stubbing JF, Jellicoe JA. Transcutaneous electrical nerve stimulation after thoracotomy. Pain relief and peak expiratory flow rate--a trial of transcutaneous electrical nerve stimulation.  
23 *Anaesthesia* 1988; 43(4): 296-8.
- 24 341. Suh HR, Kim TH, Han GS. The Effects of High-Frequency Transcutaneous Electrical Nerve Stimulation for Dental Professionals with Work-Related Musculoskeletal Disorders: A  
25 Single-Blind Randomized Placebo-Controlled Trial. *Evidence-Based Complementary and Alternative Medicine* 2015.
- 26 342. Talbot LA, Solomon Z, Webb L, Morrell C, Metter EJ. Electrical Stimulation Therapies for Active Duty Military with Patellofemoral Pain Syndrome: A Randomized Trial. *Military*  
27 *medicine* 2020.
- 28 343. Tantawy SA, Kamel DM, Abdelbasset WK. Does transcutaneous electrical nerve stimulation reduce pain and improve quality of life in patients with idiopathic chronic orchialgia? A  
29 randomized controlled trial. *Journal of Pain Research* 2018; 11: 77-82.
- 30 344. Taylor P, Hallett M, Flaherty L. Treatment of osteoarthritis of the knee with transcutaneous electrical nerve stimulation. *Pain* 1981; 11(2): 233-40.
- 31 345. Taylor A, West B, Simon B, Skelton J, Rowlingson J. How effective is TENS for acute pain? *Am J Nurs* 1983; 83(8): 1171-4.
- 32 346. Thakur R, Patidar RJOGI. Comparative study of transcutaneous electrical nerve stimulation (TENS) and tramadol hydrochloride for pain relief in labor. 2004; 54(4): 346-50.
- 33 347. Thomas IL, Tyle V, Webster J, Neilson A. An evaluation of transcutaneous electrical nerve stimulation for pain relief in labour. *The Australian & New Zealand journal of obstetrics &*  
34 *gynaecology* 1988; 28(3): 182-9.
- 35 348. Thomas M, Lundeberg T, Bjork G, Lundstrom-Lindstedt V. Pain and discomfort in primary dysmenorrhea is reduced by preemptive acupuncture or low frequency TENS. *European*  
36 *Journal of Physical Medicine and Rehabilitation* 1995; 5(3): 71-6.
- 37 349. Thorsteinsson G, Stonnington HH, Stillwell GK, Elveback LR. The placebo effect of transcutaneous electrical stimulation. *Pain* 1978; 5(1): 31-41.
- 38 350. Tilak M, Isaac SA, Fletcher J, et al. Mirror Therapy and Transcutaneous Electrical Nerve Stimulation for Management of Phantom Limb Pain in Amputees - A Single Blinded  
39 Randomized Controlled Trial. *Physiotherapy research international : the journal for researchers and clinicians in physical therapy* 2016; 21(2): 109-15.
- 40 351. Tokuda M, Tabira K, Masuda T, Nishiwada T, Shomoto K. Effect of modulated-frequency and modulated-intensity transcutaneous electrical nerve stimulation after abdominal  
41 surgery: a randomized controlled trial. *The Clinical journal of pain* 2014; 30(7): 565-70.
- 42 352. Tonella RM, Araujo S, Da Silva AMO. Transcutaneous electrical nerve stimulation in the relief of pain related to physical therapy after abdominal surgery. [Portuguese, English].  
43 *Revista brasileira de anesthesiologia* 2006; 56(6): 630-42.



## 08\_OL-TABLE1\_IncludedStudies

- 1
- 2 353. Topuz O, Ozfidan E, Ozgen M, Ardic F. Efficacy of transcutaneous electrical nerve stimulation and percutaneous neuromodulation therapy in chronic low back pain. *Journal of back and musculoskeletal rehabilitation* 2004; 17(3-4): 127-33.
- 3
- 4 354. Tosato J, Biasotto-Gonzalez D, Caria PJFP. Effect of massage therapy and of transcutaneous electrical nerve stimulation on pain and electromyographic activity in patients with temporomandibular dysfunction. 2007; 14: 21-6.
- 5
- 6 355. Treacy K. Awareness/relaxation training and transcutaneous electrical neural stimulation in the treatment of bruxism. *Journal of oral rehabilitation* 1999; 26(4): 280-7.
- 7 356. Tsen LC, Thomas J, Segal S, Datta S, Bader AM. Transcutaneous electrical nerve stimulation does not augment combined spinal epidural labour analgesia. *Canadian journal of anaesthesia = Journal canadien d'anesthésie* 2000; 47(1): 38-42.
- 8
- 9 357. Tsen LC, Thomas J, Segal S, Datta S, Bader AM. Transcutaneous electrical nerve stimulation does not augment epidural labor analgesia. *Journal of clinical anesthesia* 2001; 13(8): 571-5.
- 10
- 11 358. Tsukayama H, Yamashita H, Amagai H, Tanno Y. Randomised controlled trial comparing the effectiveness of electroacupuncture and TENS for low back pain: a preliminary study for a pragmatic trial. *Acupuncture in medicine : journal of the British Medical Acupuncture Society* 2002; 20(4): 175-80.
- 12
- 13 359. Tucker DL, Rockett M, Hasan M, Poplar S, Rule SA. Does transcutaneous electrical nerve stimulation (TENS) alleviate the pain experienced during bone marrow sampling in addition to standard techniques? A randomised, double-blinded, controlled trial. *Journal of clinical pathology* 2015; 68(6): 479-83.
- 14
- 15 360. Tugay N, Akbayrak T, Demirturk F, et al. Effectiveness of transcutaneous electrical nerve stimulation and interferential current in primary dysmenorrhea. *Pain medicine (Malden, Mass)* 2007; 8(4): 295-300.
- 16
- 17 361. Tulgar M, McGlone F, Bowsher D, Miles JB. Comparative effectiveness of different stimulation modes in relieving pain. Part I. A pilot study. *Pain* 1991; 47(2): 151-5.
- 18 362. Tulgar M, McGlone F, Bowsher D, Miles JB. Comparative effectiveness of different stimulation modes in relieving pain. Part II. A double-blind controlled long-term clinical trial. *Pain* 1991; 47(2): 157-62.
- 19
- 20 363. Unterrainer AF, Friedrich C, Krenn MH, Piotrowski WP, Golaszewski SM, Hitzl W. Postoperative and preincisional electrical nerve stimulation TENS reduce postoperative opioid requirement after major spinal surgery. *Journal of neurosurgical anesthesiology* 2010; 22(1): 1-5.
- 21
- 22 364. Unterrainer AF, Uebles FX, Gross FA, Werner GG, Krombholz MA, Hitzl W. TENS compared to opioids in postoperative analgesic therapy after major spinal surgery with regard to cognitive function. *Middle east journal of anaesthesiology* 2012; 21(6): 815-21.
- 23
- 24 365. Upton GA, Tinley P, Al-Aubaidy H, Crawford R. The influence of transcutaneous electrical nerve stimulation parameters on the level of pain perceived by participants with painful diabetic neuropathy: A crossover study. *Diabetes & metabolic syndrome* 2017; 11(2): 113-8.
- 25
- 26 366. Vaidya SM. Sacroiliac joint mobilisation versus transcutaneous electrical nerve stimulation for pregnancy induced posterior pelvic pain-a randomised clinical trial. *Journal of Clinical and Diagnostic Research* 2018; 12(1): YC04-YC7.
- 27
- 28 367. Vaillancourt S, Coulombe-Lévêque A, Fradette J, et al. Combining transcutaneous electrical nerve stimulation with therapeutic exercise to reduce pain in an elderly population: a pilot study. *Disability and rehabilitation* 2019: 1-8.
- 29
- 30 368. Valenza MC, Torres-Sanchez I, Cabrera-Martos I, Valenza-Demet G, Cano-Cappellacci M. Acute Effects of Contract-Relax Stretching vs. TENS in Young Subjects With Anterior Knee Pain: A Randomized Controlled Trial. *Journal of strength and conditioning research* 2016; 30(8): 2271-8.
- 31
- 32 369. van der Ploeg JM, Vervest HA, Liem AL, Schagen van Leeuwen JH. Transcutaneous nerve stimulation (TENS) during the first stage of labour: a randomized clinical trial. *Pain* 1996; 68(1): 75-8.
- 33
- 34 370. van der Spank JT, Cambier DC, De\_Paepe HM, Danneels LA, Witvrouw EE, Beerens L. Pain relief in labour by transcutaneous electrical nerve stimulation (TENS). *Archives of gynecology and obstetrics* 2000; 264(3): 131-6.
- 35
- 36 371. Vance CG, Rakel BA, Blodgett NP, et al. Effects of transcutaneous electrical nerve stimulation on pain, pain sensitivity, and function in people with knee osteoarthritis: a randomized controlled trial. *Physical therapy* 2012; 92(7): 898-910.
- 37
- 38 372. Vitalii C, Oleg P. The efficiency of transcutaneous electrical nerve stimulation in association with gabapentin in the treatment of neuropathic pain in patients with spinal cord injury. *Romanian Journal of Neurology/ Revista Romana de Neurologie* 2014; 13(4): 193-6.
- 39
- 40 373. Vrouva S, Batistaki C, Paraskevaidou E, et al. Comparative study of pain relief in two non-pharmacological treatments in patients with partial rotator cuff tears: A randomized trial. *Anesthesiology and Pain Medicine* 2019; 9(2).
- 41
- 42 374. Walker RH, Morris BA, Angulo DL, Schneider J, Colwell CW, Jr. Postoperative use of continuous passive motion, transcutaneous electrical nerve stimulation, and continuous cooling pad following total knee arthroplasty. *The Journal of arthroplasty* 1991; 6(2): 151-6.

08\_OL-TABLE1\_IncludedStudies

- 1  
2 375. Wang SF, Lee JP, Hwa HL. Effect of transcutaneous electrical nerve stimulation on primary dysmenorrhea. *Neuromodulation* 2009; 12(4): 302-9.
- 3 376. Warfield CA, Stein JM, Frank HA. The effect of transcutaneous electrical nerve stimulation on pain after thoracotomy. *The Annals of thoracic surgery* 1985; 39(5): 462-5.
- 4 377. Warke K, Al-Smadi J, Baxter GD, Walsh DM, Lowe-Strong AS. A double blind, placebo controlled, randomised, clinical trial investigating the efficacy of transcutaneous electrical  
5 nerve stimulation for low back pain in a multiple sclerosis population. *Multiple Sclerosis* 2004; 10(7032): S107-S.
- 6 378. Warke K, Al-Smadi J, Baxter D, Walsh D, Lowe-Strong A. Efficacy of transcutaneous electrical nerve stimulation (tens) for chronic low-back pain in a multiple sclerosis population:  
7 a randomized, placebo-controlled clinical trial. *Clinical Journal of Pain* 2006; 22(9): 812-9.
- 8 379. Yameen F, Shahbaz NN, Hasan Y, Fauz R, Abdullah M. Efficacy of transcutaneous electrical nerve stimulation and its different modes in patients with trigeminal neuralgia. *JPMA*  
9 *The Journal of the Pakistan Medical Association* 2011; 61(5): 437-9.
- 10 380. Yesil H, Hepguler S, Dundar U, Taravati S, Isleten B. Does the Use of Electrotherapies Increase the Effectiveness of Neck Stabilization Exercises for Improving Pain, Disability,  
11 Mood, and Quality of Life in Chronic Neck Pain?: A Randomized, Controlled, Single-Blind Study. *Spine* 2018; 43(20): E1174-e83.
- 12 381. Yilmaz M, Tarakci D, Tarakci E. Comparison of high-intensity laser therapy and combination of ultrasound treatment and transcutaneous nerve stimulation on cervical pain associated  
13 with cervical disc herniation: A randomized trial. *Complementary therapies in medicine* 2020; 49: 102295.
- 14 382. Yilmazer M, Kose S, Ario DT, Koken G, Ozbulut O. Efficacy of transcutaneous electrical nerve stimulation for pain relief in women undergoing office endometrial biopsy. *Archives*  
15 *of gynecology and obstetrics* 2012; 285(4): 1059-64.
- 16 383. Yokoyama M, Sun X, Oku S, et al. Comparison of percutaneous electrical nerve stimulation with transcutaneous electrical nerve stimulation for long-term pain relief in patients with  
17 chronic low back pain. *Anesthesia and Analgesia* 2004; 98(6): 1552-6.
- 18 384. Yoshimizu M, Teo AR, Ando M, Kiyohara K, Kawamura T. Relief of chronic shoulder and neck pain by electro-acupuncture and transcutaneous electrical nervous stimulation: A  
19 randomized crossover trial. *Medical Acupuncture* 2012; 24(2): 97-103.
- 20 385. Yüksel M, Ayaş Ş, Cabioglu MT, Yilmaz D, Cabioglu C. Quantitative Data for Transcutaneous Electrical Nerve Stimulation and Acupuncture Effectiveness in Treatment of  
21 Fibromyalgia Syndrome. *Evidence-based Complementary and Alternative Medicine* 2019; 2019.
- 22 386. Yurtkuran M, Kocagil T. TENS, electroacupuncture and ice massage: comparison of treatment for osteoarthritis of the knee. *American Journal of Acupuncture* 1999; 27(3-4): 133-40.
- 23 387. Zakariaee SS, Shahoei R, Nosab LH, Moradi G, Farshbaf M. The Effects of Transcutaneous Electrical Nerve Stimulation on Post-Episiotomy Pain Severity in Primiparous Women: A  
24 Randomized, Controlled, Placebo Clinical Trial. *Galen Medical Journal* 2019; 8: UNSP e1404.
- 25 388. Zhang Y, Zhang J, Wang L, Wang K, Svensson P. Effect of transcutaneous electrical nerve stimulation on jaw movement-evoked pain in patients with TMJ disc displacement without  
26 reduction and healthy controls. *Acta Odontologica Scandinavica* 2020; 78(4): 309-20.
- 27 389. Zhou MM, Li F, Lu WB, Wu JF, Pei S. Efficiency of Neuromuscular Electrical Stimulation and Transcutaneous Nerve Stimulation on Hemiplegic Shoulder Pain: A Randomized  
28 Controlled Trial. *Archives of Physical Medicine and Rehabilitation* 2018; 99(9): 1730-9.
- 29  
30  
31  
32  
33  
34  
35  
36  
37  
38  
39  
40  
41  
42  
43  
44  
45  
46

## Online Table 2

## Records Awaiting Classification

| Reference                                 | Language     | Reason             |
|-------------------------------------------|--------------|--------------------|
| Aiyejusunle et al. 2007 <sup>1</sup>      | Not reported | Need to obtain PDF |
| Chen et al. 2007 <sup>2</sup>             | Chinese      | Needs translation  |
| Houshyar et al. 2015 <sup>3</sup>         | Persian      | Needs translation  |
| Kim et al. 2020 <sup>4</sup>              | Not reported | Need to obtain PDF |
| Kumar and Rahim 2019 <sup>5</sup>         | Not reported | Need to obtain PDF |
| Mehlhorn et al. 2005 <sup>6</sup>         | German       | Needs translation  |
| Pourmomeny et al. 2009 <sup>7</sup>       | Persian      | Needs translation  |
| Renklitepe et al. 1995 <sup>8</sup>       | Not reported | Need to obtain PDF |
| Sakai et al. 2001 <sup>9</sup>            | Japanese     | Needs translation  |
| Tokuda et al. 2013 <sup>10</sup>          | Japanese     | Needs translation  |
| Tunc et al. 2002 <sup>11</sup>            | Not reported | Need to obtain PDF |
| van der Pierjil et al. 1998 <sup>12</sup> | Not reported | Needs translation  |
| Wang et al. 2005 <sup>13</sup>            | Not reported | Need to obtain PDF |
| Xiao et al. 2002 <sup>14</sup>            | Not reported | Need to obtain PDF |
| Zati et al. 2004 <sup>15</sup>            | Italian      | Needs translation  |
| Zheng et al., 2011 <sup>16</sup>          | Chinese      | Needs translation  |
| Zhang et al. 2014 <sup>17</sup>           | Chinese      | Needs translation  |
| Zhong and Zhang 2017 <sup>18</sup>        | Not reported | Need to obtain PDF |
| Zhou et al. 2009 <sup>19</sup>            | Not reported | Need to obtain PDF |

## REFERENCES – STUDIES AWAITING CLASSIFICATION\*

\*Note: Reference numbering in this list relates only to studies cited in this table

1. Aiyejusunle CB, Kola-Korolo TA, Ajiboye OA. Comparison of the effects of TENS and sodium salicylate iontophoresis in the management of osteoarthritis of the knee. *Nigerian Quarterly Journal of Hospital Medicine* 2007; 17(1): 30-4.
2. Chen L, Zhang XL, Ding H, Tao YQ, Zhan HS. Comparative study on effects of manipulation treatment and transcutaneous electrical nerve stimulation on patients with cervicogenic headache. [Chinese]. *Journal of Chinese Integrative Medicine* 2007; 5(4): 403-6.
3. Houshyar AE, Rezaie HH, Jahani Y, Kazemi M, Monfared S. Comparison of two methods of aromatherapy with lavender essence and Transcutaneous Electrical Nerve Stimulation (TENS) on cesarean postoperative pain. [Persian]. *Iranian Journal of Obstetrics, Gynecology and Infertility* 2015; 18(146): 6-12.
4. Kim B, Lohman E, Yim J. Acupuncture-like Transcutaneous Electrical Nerve Stimulation for Pain, Function, and Biochemical Inflammation After Total Knee Arthroplasty. *Alternative Therapies in Health and Medicine* 2020. [Volume, issue and pages not provided]
5. Kumar SS, Abdul Rahim A. A study on effectiveness of conventional mode TENS on trismus. *Research Journal of Pharmacy and Technology* 2019; 12(3): 1193-6.
6. Mehlhorn G, Beckmann M, Schild R, Binder HJGuF. Analgesie von schmerzhaften Nachwehen mittels transkutaner elektrischer Nervenstimulation (TENS) vs. Metamizol. 2005; 65(03): 266-71.
7. Pourmomeny AA, Amini M, Safaei H, Hassanzadeh A. The effect of electroanalgesia on pain relief in patient with diabetic neuropathy type II. [Arabic]. *Iranian Journal of Endocrinology and Metabolism* 2009; 11(4): 363-472.
8. Renklitepe N, Dogan N, Kayhan O, Ozaras N. Effects of different TENS electrode types in degenerative joint disease of the hands. [Turkish]. *Fizik Tedavi Rehabilitasyon Dergisi* 1995; 19(4): 204-8.

09\_OL-TABLE2\_AwaitingClassification

- 1
  - 2
  - 3
  - 4
  - 5
  - 6
  - 7
  - 8
  - 9
  - 10
  - 11
  - 12
  - 13
  - 14
  - 15
  - 16
  - 17
  - 18
  - 19
  - 20
  - 21
  - 22
  - 23
  - 24
  - 25
  - 26
  - 27
  - 28
  - 29
  - 30
  - 31
  - 32
  - 33
  - 34
  - 35
  - 36
  - 37
  - 38
  - 39
  - 40
  - 41
  - 42
  - 43
  - 44
  - 45
  - 46
  - 47
  - 48
  - 49
  - 50
  - 51
  - 52
  - 53
  - 54
  - 55
  - 56
  - 57
  - 58
  - 59
  - 60
9. Sakai T, Tsutani K, Tsukayama H. (Multi center randomized controlled trial of acupuncture with electric stimulation and acupuncture-like transcutaneous electrical nerve stimulation for lumbago) [Japanese]. Zen Nippon Shinkyu Gagai Zasshi [Journal of Japan Society of Acupuncture and Moxibustion] 2001; 51(2): 175-184.
10. Tokuda M, Tabira K, Masuda T, Nishiwada T, Shomoto K. Effect of Transcutaneous Electrical Nerve Stimulation after Abdominal Surgery-A Randomized Controlled Trial. Rigakuryoho Kagaku 2013; 28(4): 415-21.
11. Tunc M, Gunal H, Bilgili T, Ulus F, Tunc H, Savkilioglu E. The effect of TENS on epidural patient controlled analgesia with tramadol for postthoracotomy pain relief. [Turkish]. Turk Anesteziyoloji ve Reanimasyon 2002; 30(7): 315-21.
12. van dPI, Smits A, Verwer J. Elektrodeplaatsing bij TENS: een pilot-studie. Nederlands Tijdschrift fur Fysiotherapie 1998; 108(5): 128-31.
13. Wang N XB, Wei X, Li M, Xu Y. A clinical controlled study of immediate analgesia effect of TENS on post-operative pain after total knee replacement. Chinese Journal of Rehabilitation Medicine 2005; 20: 188-90.
14. Xiao H, She SZ, Xu LX. (Effects of transcutaneous electric nerve stimulation on the postoperative analgesia with PCEA and recovery after surgery) [Chinese - simplified characters]. Zhongguo Linchuang Kangfu [Chinese Journal of Clinical Rehabilitation] 2002; 6(12):1784-1785.
15. Zati A, Fortuna D, Valent A, Pulvirenti F, Bilotta TW. Treatment of low back pain caused by intervertebral disk displacement: comparison between high power laser, TENS and NSAIDs. Medicina Dello Sport 2004; 57(1): 77-82.
16. Zheng G, Huang X, Zhao X. Influence of neuromuscular electrical stimulation of muscoli quadriceps femoris on motor function rehabilitation after total knee replacement; 2011; 26: 1126-1130.
17. Zhang Q, Zhang JH, Tong PJ. [Application of transcutaneous electrical nerve stimulation to multimodal analgesia after total knee arthroplasty]. Zhongguo Gu Shang [China Journal of Orthopaedics and Traumatology] 2014; 27(4): 283-6.
18. Zhong J, Zhang L. [Transcutaneous electrical acupoint stimulation for pregnancy of in vitro fertilization-embryo transfer]. Zhongguo Zhen Jiu [Chinese Acupuncture & Moxibustion] 2017; 37(3): 253-5.
19. Zhou GY, Zhou GS, Jian-hong J. Clinical observation on transcutaneous electrical acupoint stimulation for treatment of functional dyspepsia. [Chinese]. Zhongguo Zhen Jiu [Chinese Acupuncture & Moxibustion] 2009; 29(6): 436-40.

10\_OL-TABLE3\_ExcludedStudies

## ONLINE TABLE 3

## Excluded studies, with reasons, based on screening full text records

| Reference                                   | Reason for exclusion                                                                             | Description of study                                                                                                                                                                                                                                                                                                                                                                                                                                            |
|---------------------------------------------|--------------------------------------------------------------------------------------------------|-----------------------------------------------------------------------------------------------------------------------------------------------------------------------------------------------------------------------------------------------------------------------------------------------------------------------------------------------------------------------------------------------------------------------------------------------------------------|
| Aguilar Ferrandiz et al., 2016 <sup>1</sup> | Not standard TENS - auto-targeted neurostimulation                                               | Evaluated Nervomatrix Soleve® auto-targeted neurostimulation device providing TENS-stimulation and mechanical pressure for chronic low back pain. Technical specifications differ from a standard TENS device                                                                                                                                                                                                                                                   |
| Albayrak, 2017 <sup>2</sup>                 | Not an RCT                                                                                       | Evaluated TENS on persistent post-surgical pain after total knee arthroplasty. Retrospective study of prospectively collected data                                                                                                                                                                                                                                                                                                                              |
| Alhusaini et al., 2019 <sup>3</sup>         | No pain outcomes – Primary outcomes grip strength and function; secondary outcome manual ability | Evaluated TENS combined with therapeutic exercises for hand function by reducing spasticity in children with hemiplegic cerebral palsy                                                                                                                                                                                                                                                                                                                          |
| Altas et al., 2019 <sup>4</sup>             | Not possible to isolate TENS                                                                     | Evaluated the effect of physical therapy modalities on pain, sleep, mental status, and quality of life of patients with osteoarthritis.                                                                                                                                                                                                                                                                                                                         |
| Al Zamil et al., 2019 <sup>5</sup>          | Not full report - Abstract of conference presentation                                            | Evaluated TENS of median nerves and acupuncture in the treatment of carpal tunnel syndrome                                                                                                                                                                                                                                                                                                                                                                      |
| Askin et al., 2014 <sup>6</sup>             | Not possible to isolate effect of TENS                                                           | Evaluated ultrasound therapy for stellate ganglion blockade in complex regional pain syndrome type I. TENS delivered in combination with drug medication, contrast bath and exercise to all groups.                                                                                                                                                                                                                                                             |
| Atalay et al., 2009 <sup>7</sup>            | No pain outcomes                                                                                 | Evaluated TENS for viability of skin flaps created during mastectomy in breast cancer patients. No pain outcomes                                                                                                                                                                                                                                                                                                                                                |
| Augustinsson et al., 1977 <sup>8</sup>      | Not an RCT                                                                                       | Evaluated TENS for pain during delivery labour pain). Open label pre-post study single group study without comparison intervention(s)                                                                                                                                                                                                                                                                                                                           |
| Avramidis et al., 2003 <sup>9</sup>         | Not standard TENS – neuromuscular electrical stimulation                                         | Evaluated electric muscle stimulation during rehabilitation after total knee arthroplasty - MicroStim 2-channel (MS-2) neuromuscular stimulator                                                                                                                                                                                                                                                                                                                 |
| Aydın et al., 2015 <sup>10</sup>            | TENS administered internally - intravaginal                                                      | Evaluated vaginal electrical stimulation for sexual function using the insertion of a vaginal probe inserted delivering medium-frequency (50 Hz) alternating current (duty cycle 5 seconds on followed by 5 seconds off) generated by a MyoBravo electro stimulation instrument (MTR+ Vertiebs GmbH, Berlin)                                                                                                                                                    |
| Aydogan et al., 2014 <sup>11</sup>          | Not standard TENS - Frequency Rhythmic Electrical Modulation System                              | Evaluated pre-emptive frequency rhythmic electrical modulation using a Phyback device (PBK2C) in patients undergoing lumbar stabilization                                                                                                                                                                                                                                                                                                                       |
| Ayyildiz et al. 2004 <sup>12</sup>          | Not an RCT                                                                                       | Evaluated TENS for pain associated with extracorporeal short-wave lithotripsy. Open label pre-post study single group study without comparison intervention(s).                                                                                                                                                                                                                                                                                                 |
| Bai et al., 2018 <sup>13</sup>              | Not standard TENS - transcutaneous electric acupoint stimulation                                 | Evaluated transcutaneous electric acupoint stimulation (TEAS) on stress response during extubation after general anaesthesia in patients undergoing elective supratentorial craniotomy. Primary purpose of TEAS was not to treat pain. TEAS was administered using a Hwato electronic acupuncture treatment instrument (model no.: SDZ-II) delivering an alternate dense- disperse frequency of 2/10 Hz (2 Hz for 10 s and 10 Hz) to various acupuncture points |
| Behm et al., 2019 <sup>14</sup>             | Not pain outcomes - Fatigue rather than pain                                                     | Evaluated if TENS-induced pain suppression would augment force output during a fatiguing protocol in the treated and contralateral muscles.                                                                                                                                                                                                                                                                                                                     |
| Belmonte et al., 2012 <sup>15</sup>         | Not standard TENS - microcurrent electrical stimulation and bioresonance device                  | Evaluated low-frequency low-intensity electrotherapy in the treatment of chronic upper limb breast cancer-related lymphoedema. Used a Flowwave2Home device delivering microcurrents via a wave of carrier frequency ranging from 0.31 to 6.16 Hz and a modulation between 400 and 2120 Hz; the low offset voltage is always between +12 and -12 V.                                                                                                              |
| Bouafif and Ellouze, 2019 <sup>16</sup>     | Not an RCT                                                                                       | Evaluated modulated PWM-TENS for non-cancer pain. PWM-TENS used sinusoidal waves sinusoidal carrier whose frequency varies according to the mode of stimulation. There was a comparison with 'classical TENS' but this was not a RCT.                                                                                                                                                                                                                           |
| Bundsen et al., 1981 <sup>17</sup>          | Not an RCT                                                                                       | Evaluated TENS for labour pain. Retrospective (stated as prospective in title) open label questionnaire with each patient matched with a control without randomisation.                                                                                                                                                                                                                                                                                         |
| Burch et al., 2008 <sup>18</sup>            | Not standard TENS - low-current TENS (0.5mA used as control)                                     | Evaluated combination of interferential and patterned muscle stimulation for osteoarthritis of knee. Control group received low-current TENS biphasic square wave with a 0.2 Hz frequency and a fixed amplitude of 60 mA, with pulse width adjusted to provide a net output of 73 nC and delivered across 300 microseconds equivalent to a peak output of 0.5 mA. This did not meet our criteria for standard TENS                                              |
| Burssens et al., 2003 <sup>19</sup>         | No pain outcomes                                                                                 | Evaluated burst TENS on the healing of Achilles tendon suture                                                                                                                                                                                                                                                                                                                                                                                                   |
| Carbonario et al., 2013 <sup>20</sup>       | Not an RCT                                                                                       | Evaluated TENS for tender points in fibromyalgia. Patients were allocated 'sequentially' and there was no mention of randomisation within the report (quasi-RCT). This was included in the Cochrane review on Fibromyalgia.                                                                                                                                                                                                                                     |



10\_OL-TABLE3\_ExcludedStudies

| Reference                               | Reason for exclusion                                                                                       | Description of study                                                                                                                                                                                                                                                                                                                                                                                               |
|-----------------------------------------|------------------------------------------------------------------------------------------------------------|--------------------------------------------------------------------------------------------------------------------------------------------------------------------------------------------------------------------------------------------------------------------------------------------------------------------------------------------------------------------------------------------------------------------|
| Chao et al., 2007 <sup>21</sup>         | TENS delivered to acupuncture points distant to pain                                                       | Evaluated TENS on acupuncture points for pain during the first stage of labour using two pairs of electrodes placed at bilateral Li 4 (Hegu) points (midpoint between first and second carpal bones, first web space dorsal side) and Sp6 (Sanyinjiao) points (5 cm above medial malleolus in lower leg)                                                                                                           |
| Chee and Walton 1986 <sup>22</sup>      | Not standard TENS - microcurrent electrical stimulation                                                    | Evaluated treatment of trigger points with micro amperage TENS using an Electro-acuscope 80 stimulator                                                                                                                                                                                                                                                                                                             |
| Cheing and Hui-Chan, 2004 <sup>23</sup> | No pain outcomes                                                                                           | Evaluated addition of TENS to exercise training for knee osteoarthritis but measured functional outcomes only. There were no pain outcomes in report                                                                                                                                                                                                                                                               |
| Chen et al., 2013 <sup>24</sup>         | Not standard TENS electrodes                                                                               | Evaluated TENS for knee osteoarthritis using silver spike point electrodes, similar to IFT suction cups, rather than self-adhering carbon-rubber TENS electrodes                                                                                                                                                                                                                                                   |
| Chen et al. 2013 <sup>25</sup>          | TENS on acupuncture points using TEAS                                                                      | Evaluated electroacupuncture, TENS and acupoint massage on peri-arthritis of shoulder.                                                                                                                                                                                                                                                                                                                             |
| Chen et al., 2015 <sup>26</sup>         | Not standard TENS - transcutaneous electric acupoint stimulation                                           | Evaluated transcutaneous electric acupoint stimulation on post-procedural abdominal pain after colonoscopy at Jiaji (EX-B2) points were located on both sides of the spinous column using a Han's Acupoint Nerve Stimulator (HANS-200A, Nanjing Jisheng Medical Technology Co., Ltd., Nanjing, China), delivering a dense-and-disperse frequency at 2/100 Hz for 30 min prior to induction.                        |
| Chen et al., 2015 <sup>27</sup>         | Not standard TENS - transcutaneous electric acupoint stimulation                                           | Evaluated transcutaneous electric acupoint stimulation for remifentanyl-induced hyperalgesia in patients undergoing thyroidectomy and delivered as 30 min of stimulation (6-9 mA, 2/10 Hz) on the Hegu (LI4) and Neiguan (PC6) before anaesthesia (pre-emptive) and terminated before the end of surgery. Stimulation was not at site of pain or over nerve bundles.                                               |
| Chen et al., 2015 <sup>28</sup>         | Not standard TENS - transcutaneous electric acupoint stimulation                                           | Evaluated transcutaneous electric acupoint stimulation on postoperative quality of recovery after thyroidectomy with general anaesthesia administered at bilateral Hegu (LI4) and Neiguan (PC6) before induction of anaesthesia (pre-emptive). TEAS was delivered at a disperse-dense frequency of 2/10 Hz and an intensity of 6-9 mA for 30 min using the Hans electronic acupuncture apparatus (HANS-100A)       |
| Chen et al., 2020 <sup>29</sup>         | Not Standard TENS -TEAS                                                                                    | Evaluated efficacy of TEAS for sedation and postoperative analgesia in lung cancer patients undergoing thoracoscopic pulmonary resection.                                                                                                                                                                                                                                                                          |
| Cheng and Pomeranz, 1986 <sup>30</sup>  | Not standard TENS - Codetron                                                                               | Evaluated 'acupuncture-like stimulation' using a Codetron device for chronic musculoskeletal pain and delivering currents randomly to acupuncture points at different locations on the body via seven electrodes.                                                                                                                                                                                                  |
| Chiu et al., 1999 <sup>31</sup>         | TENS delivered to acupuncture points distant to pain                                                       | Evaluated TENS for pain during hemorrhoidectomy. Electrodes were positioned on acupuncture points distant to the painful area (i.e. dorsal web between the first and the second metacarpal bones (Hegu, Large Intestine meridian, 4th ampoin, negative electrode) and on radial side 3 cm proximal to the wrist crease (Lieque, Lung meridian, 7th ampoin, positive electrode) using a Han Acutens, WQ1002F device |
| Coletta et al., 1988 <sup>32</sup>      | Unable to isolate TENS effects                                                                             | Evaluated TENS vs. TENS + ointment containing Etofenamate. Not possible to isolate effects of TENS                                                                                                                                                                                                                                                                                                                 |
| Conn et al., 1986 <sup>33</sup>         | Some participants not adults                                                                               | Evaluated TENS for pain following appendicectomy. Included children (minimum age = 13 years (TENS), 15 (sham) and 13 (control))                                                                                                                                                                                                                                                                                    |
| Cornell et al., 1984 <sup>34</sup>      | Not an RCT                                                                                                 | Evaluated TENS for pain following foot surgery. Data gathered prospectively during TENS was compared with retrospective data of patients that did not receive TENS harvested from medical records                                                                                                                                                                                                                  |
| Demidas et al., 2019 <sup>35</sup>      | Healthy humans                                                                                             | Evaluated touch and pain sensations and the correlation between them in diadynamic current and TENS                                                                                                                                                                                                                                                                                                                |
| Duzyj et al., 2020 <sup>36</sup>        | Not full report – Abstract of conference poster presentation                                               | Evaluated effect of TENS therapy in the pain management of women after caesarean delivery.                                                                                                                                                                                                                                                                                                                         |
| Dodick et al., 2015 <sup>37</sup>       | Not standard TENS - invasive technique                                                                     | Evaluated peripheral nerve stimulation (PNS) of the occipital nerves for managing chronic migraine using implanted with a neurostimulation system Not TENS                                                                                                                                                                                                                                                         |
| Eidy et al., 2016 <sup>38</sup>         | TENS given pre-emptive to general anaesthesia / surgery - pain measured after surgery with no TENS post op | Evaluated effects of preoperative TENS on post inguinal hernia repair pain                                                                                                                                                                                                                                                                                                                                         |
| Ertzgaard et al., 2018 <sup>39</sup>    | Not standard TENS electrodes                                                                               | Evaluation of TENS for spasticity using an AT Mollii® electrotherapy system consisting of a two-piece garment equipped with 58 electrodes and a control unit.                                                                                                                                                                                                                                                      |
| Fagade and Obilade, 2003 <sup>40</sup>  | No pain outcomes                                                                                           | Evaluated TENS on post-IMF trismus and pain in Nigerian Patients. No pain outcomes                                                                                                                                                                                                                                                                                                                                 |

## 10\_OL-TABLE3\_ExcludedStudies

| Reference                                 | Reason for exclusion                                                                                                                                                                                                                                                                           | Description of study                                                                                                                                                                                                                                                                                                                                                                                                                                                                                                                                                                                                                                                                                                                                                                                                                            |
|-------------------------------------------|------------------------------------------------------------------------------------------------------------------------------------------------------------------------------------------------------------------------------------------------------------------------------------------------|-------------------------------------------------------------------------------------------------------------------------------------------------------------------------------------------------------------------------------------------------------------------------------------------------------------------------------------------------------------------------------------------------------------------------------------------------------------------------------------------------------------------------------------------------------------------------------------------------------------------------------------------------------------------------------------------------------------------------------------------------------------------------------------------------------------------------------------------------|
| Fargas-Babjak et al., 1989 <sup>41</sup>  | Not standard TENS – Codetron                                                                                                                                                                                                                                                                   | Evaluated ‘acupuncture-like stimulation’ for osteoarthritis of the hip or knee using a Codetron device                                                                                                                                                                                                                                                                                                                                                                                                                                                                                                                                                                                                                                                                                                                                          |
| Fargas-Babjak et al., 1992 <sup>42</sup>  | Not standard TENS – Codetron                                                                                                                                                                                                                                                                   | Evaluated ‘acupuncture-like stimulation’ for chronic pain syndrome or osteoarthritis using a Codetron device                                                                                                                                                                                                                                                                                                                                                                                                                                                                                                                                                                                                                                                                                                                                    |
| Fary et al., 2011 <sup>43</sup>           | Not standard TENS - subsensory pulsed electrical stimulation                                                                                                                                                                                                                                   | Evaluated pulsed electrical stimulation for osteoarthritis of the knee using a commercially available TENS stimulator (Metron Digi-10s) that was modified by a biomedical engineer to deliver pulsed, asymmetrically biphasic, exponentially decreasing waveform currents with a frequency of 100 Hz and pulse width of 4 msec. Author’s state “ <i>Participants attached the device and turned the intensity up until they could feel pins and needles or a prickling sensation under one or both electrodes. After achieving sensory output, participants were instructed to turn the intensity down until they could no longer feel any electrical stimulation. At this stage, a built-in locking mechanism was engaged that prevented subsequent adjustment of intensity without restarting the device.</i> ” Thus, subsensory stimulation. |
| Fletcher-Smith et al., 2019 <sup>44</sup> | Not standard TENS - Neuromuscular Electrical Stimulation “... current intensity was increased to produce an alternating contraction of the flexors and extensors using a flex-hold-extend-hold pattern, ensuring that a pure movement was produced with no/minimal ulnar or radial deviation.” | Evaluated feasibility of initiating electrical stimulation treatment of wrist extensors and flexors in patients early after stroke to prevent muscle contractures and pain.                                                                                                                                                                                                                                                                                                                                                                                                                                                                                                                                                                                                                                                                     |
| Gadsby et al., 1997 <sup>45</sup>         | TENS delivered to acupuncture points distant to pain                                                                                                                                                                                                                                           | Evaluated acupuncture-like TENS within palliative care delivered to acupuncture points PC6 (Neiguan) and LI4 (Hegu) of the dominant hand                                                                                                                                                                                                                                                                                                                                                                                                                                                                                                                                                                                                                                                                                                        |
| Gao et al., 2017 <sup>46</sup>            | Not standard TENS - transcutaneous electric acupoint stimulation                                                                                                                                                                                                                               | Evaluated transcutaneous electric acupoint stimulation for procedural pain during and post thyroidectomy administered at PC6 (Neiguan) and LI4 (Hegu) and distant from the painful site. Full article in Chinese.                                                                                                                                                                                                                                                                                                                                                                                                                                                                                                                                                                                                                               |
| Garaud et al., 2018 <sup>47</sup>         | Cannot isolate effects of TENS                                                                                                                                                                                                                                                                 | Evaluated efficacy of TENS in the treatment LBP when associated to a therapeutic education program (TEP).                                                                                                                                                                                                                                                                                                                                                                                                                                                                                                                                                                                                                                                                                                                                       |
| Garland et al., 2007 <sup>48</sup>        | Not standard TENS - highly optimized, capacitively coupled, pulsed electrical stimulator                                                                                                                                                                                                       | Evaluated highly optimized, capacitively coupled, pulsed electrical stimulator for osteoarthritis of the knee using a knee garment with flexible, embedded electrodes and a small battery-operated generator that produced a 100-Hz, negative pulsed signal (BioniCare Medical Technologies, Inc., Sparks, Maryland). Authors state - “ <i>They then turned on the device, increased the signal amplitude to between 0 and 12 V by rotating a dial until a tingling sensation was felt over the knee or thigh, and then reducing the amplitude until this sensation disappeared. Thus, active treatment remained imperceptible and indistinguishable from placebo.</i> ” P631 and “In fact, TENS and PES differ in many ways.” P635                                                                                                             |
| Gaul et al., 2016 <sup>49</sup>           | Not standard TENS - invasive vagus nerve stimulation                                                                                                                                                                                                                                           | Evaluated non-invasive vagus nerve stimulation for prevention and acute treatment of chronic cluster headache using “... a low-voltage electrical signal (5-kHz sine wave series that occurred for 1 ms and repeated every 40 ms (25Hz)).” p 535                                                                                                                                                                                                                                                                                                                                                                                                                                                                                                                                                                                                |
| Geirsson et al., 1993 <sup>50</sup>       | Not standard TENS - posterior tibial nerve stimulation                                                                                                                                                                                                                                         | Evaluated TENS of the tibial nerve in patients with interstitial cystitis using electrodes positioned over the tibial nerve on the foot. Thus, TENS delivered distant to symptoms. Posterior tibial nerve stimulation is a neuromodulation technique to treat overactive bladder and associated symptoms. TENS is administered over tibial nerve distant from sensations associated with urinary urgency.                                                                                                                                                                                                                                                                                                                                                                                                                                       |
| Ghoneame et al., 1999c <sup>51</sup>      | Not standard TENS - percutaneous electrical nerve stimulation                                                                                                                                                                                                                                  | Evaluated the effect of stimulus frequency on response to percutaneous electrical nerve stimulation in patients with chronic low back pain delivered via ten, 32-gauge (0.2 mm) stainless steel acupuncture-like needle probes placed into soft tissue and/or muscle in the low back region to a depth of 2–4 cm.                                                                                                                                                                                                                                                                                                                                                                                                                                                                                                                               |
| Gokce et al., 2020 <sup>52</sup>          | Not RCT                                                                                                                                                                                                                                                                                        | Evaluated bilateral transcutaneous tibial nerve stimulation on constipation severity in geriatric patients with refractory chronic constipation.                                                                                                                                                                                                                                                                                                                                                                                                                                                                                                                                                                                                                                                                                                |
| Gottfried et al., 2019 <sup>53</sup>      | Not focussed on pain - Not TENS - abstract                                                                                                                                                                                                                                                     | Evaluated transcutaneous vagal nerve stimulation improves symptoms, pain, and gastric emptying in patients with idiopathic gastroparesis.                                                                                                                                                                                                                                                                                                                                                                                                                                                                                                                                                                                                                                                                                                       |
| Govil et al., 2020 <sup>54</sup>          | Not RCT                                                                                                                                                                                                                                                                                        | Evaluated extent to which genetic variability modifies Transcutaneous Electrical Nerve Stimulation (TENS) effectiveness in osteoarthritic knee pain                                                                                                                                                                                                                                                                                                                                                                                                                                                                                                                                                                                                                                                                                             |
| Gu et al., 2019 <sup>55</sup>             | Not standard TENS - TEAS                                                                                                                                                                                                                                                                       | Evaluated effects of TEAS on gastrointestinal function recovery after laparoscopic radical gastrectomy                                                                                                                                                                                                                                                                                                                                                                                                                                                                                                                                                                                                                                                                                                                                          |
| Gorodetskiy et al., 2007 <sup>56</sup>    | Not standard TENS - non-invasive interactive neurostimulation (InterX)                                                                                                                                                                                                                         | Evaluated non-invasive interactive neurostimulation in the post-operative recovery of patients with a trochanteric fracture of the femur. Currents delivered using a handheld, non-invasive, interactive neurostimulation device (InterX 5000; Neuro Resource Group, Plano, Texas) device that “ ... generates a high peak amplitude averaging 17 volts on the skin with a low current of about 6 mA, and damped biphasic electrical impulses which are delivered to the tissue through a pair of concentric electrodes placed in direct contact with the target area. The device is able to adjust its strength and damping of the biphasic stimulus changes in accordance with the impedance of the underlying tissue (Fig. 1), resulting in a highly sensitive and variable voltage in order to maintain constant peak current.”             |



10\_OL-TABLE3\_ExcludedStudies

| Reference                                   | Reason for exclusion                                                               | Description of study                                                                                                                                                                                                                                                                                                                                                                                                                                                                                                        |
|---------------------------------------------|------------------------------------------------------------------------------------|-----------------------------------------------------------------------------------------------------------------------------------------------------------------------------------------------------------------------------------------------------------------------------------------------------------------------------------------------------------------------------------------------------------------------------------------------------------------------------------------------------------------------------|
| Harrison et al., 1987 <sup>57</sup>         | Not an RCT – May also be using part of sample in Harrison 1986                     | Evaluated TENS for labour pain. Patient self-selected treatment – not random allocation/RCT “All patients were informed about the methods of analgesia available, including TENS. They were asked if they had decided upon a specific form of analgesia and what it was. Information regarding the trial and its aims was then given to all potential participants and those giving informed consent were enrolled in their specific group of choice.”                                                                      |
| Hedner et al., 1996 <sup>58</sup>           | Not an RCT – narrative review                                                      | This is a narrative overview that describes the RCT by Milson et al., 1994 - included                                                                                                                                                                                                                                                                                                                                                                                                                                       |
| Herman et al., 1994 <sup>59</sup>           | Not standard TENS - Codetron                                                       | Evaluated ‘acupuncture-like stimulation’ using a Codetron device for acute occupational low back pain. Codetron is a neuromodulation technique described as the delivery of acupuncture-like stimulation to six locations on the body in a random order.                                                                                                                                                                                                                                                                    |
| Hettrick et al., 2004 <sup>60</sup>         | No pain outcome – measured itch                                                    | Evaluated the role of TENS for the management of burn-related pruritus                                                                                                                                                                                                                                                                                                                                                                                                                                                      |
| Hsieh et al., 1992 <sup>61</sup>            | Not an RCT – analysis of scales used in an RCT by <sup>62</sup> which was excluded | Evaluated reliability of instruments used in a RCT of transcutaneous muscle stimulation on chronic low back pain. This publication pre-empted publication of RCT by Pope et al., 1994                                                                                                                                                                                                                                                                                                                                       |
| Huang et al., 2017 <sup>63</sup>            | Not standard TENS - transcutaneous electric acupoint stimulation                   | Evaluated transcutaneous electrical acupoint stimulation at different frequencies on perioperative anaesthetic dosage, recovery, complications, and prognosis in video-assisted thoracic surgical lobectomy delivered to acupoints Neiguan (PC6), Hegu (LI4), Lieque (LU7), and Quchi (LI11) distant from pain and using a HANS-200A Acupoint Stimulator and frequency set as 2/100, 2, or 100 Hz in the dense-and-disperse mode before, during and post-surgery                                                            |
| Huang et al., 2018 <sup>64</sup>            | Not standard TENS - transcutaneous electric acupoint stimulation                   | Evaluated transcutaneous electrical acupoint stimulation for recovery after laparoscopic colorectal cancer resection delivered to ST36 (leg) distant to pain before and during surgery                                                                                                                                                                                                                                                                                                                                      |
| Huang et al., 2019 <sup>65</sup>            | Not standard TENS - transcutaneous electrical acupoint stimulation                 | Evaluated transcutaneous electrical acupoint stimulation for pain in patients “in expansion process of skin soft tissue dilator on forehead by water injection applied to acupuncture points at the wrist (PC6), forehead (shangxing) and diwei points. Article in Chinese                                                                                                                                                                                                                                                  |
| Ing et al., 2015 <sup>66</sup>              | Not standard TENS - microampere rather than milliamperere                          | Evaluated TENS for chronic postherpetic neuralgia using electronic neuroadaptive regulation (SCENAR) delivered using a Tennant Biomodulator (TBM) device. The authors state “ <i>The major difference between SCENAR and TBM devices and the traditional TENS units is that the former devices utilize microamps, not the milliamps utilized by the TENS units.</i> ” P477                                                                                                                                                  |
| Issenman et al., 1985 <sup>67</sup>         | Not an RCT                                                                         | Evaluated TENS for pain control after spinal fusion with Harrington rods and assessed ‘hospital charts’ of patients who used TENS with sex and age matched controls. It was described as an evaluation of the effectiveness of their postoperative pain management programme with no statement that this was a prospective study with randomisation                                                                                                                                                                         |
| Itoh et al., 2008 <sup>68</sup>             | Not standard TENS – electrical characteristics are interferential therapy          | Evaluated TENS for osteoarthritis of the knee versus acupuncture or acupuncture combined with TENS or topical poultice. The authors describe this as TENS but inspection of the reported electric characteristics suggest this is IFT “single-channel portable TENS unit (model HVF3000, OMRON Healthcare Co Ltd, Japan), which sends between two electrodes a premixed amplitude-modulated frequency of 122 Hz (beat frequency) generated by two medium frequency sinusoidal waves of 4.0 and 4.122 kHz (feed frequency).” |
| Itoh et al., 2009 <sup>69</sup>             | Not standard TENS – electrical characteristics are interferential therapy          | Evaluated TENS for chronic low back pain versus acupuncture or acupuncture combined with TENS or topical poultice. The authors describe this as TENS but inspection of the reported electric characteristics suggest this is IFT “single-channel portable TENS unit (model HVF3000, OMRON Healthcare Co Ltd, Japan), which sends between two electrodes a premixed amplitude-modulated frequency of 122 Hz (beat frequency) generated by two medium frequency sinusoidal waves of 4.0 and 4.122 kHz (feed frequency).”      |
| Jarden et al., 1999 <sup>70</sup>           | Conference abstract - ? reporting RCT by Jarzem et al., 2005 (included)            | Evaluated conventional transcutaneous electrical nerve stimulation [TENS] with sham therapy using a randomized double-blind crossover design.<br>Transcutaneous electrical nerve stimulation for non-acute low back pain: a randomized double-blind study of conventional, nu-waveform, acupuncture-type and sham therapies.                                                                                                                                                                                                |
| Jeans et al., 1979 <sup>71</sup>            | Not an RCT                                                                         | Evaluated the effect of brief, intense transcutaneous electrical stimulation on chronic pain                                                                                                                                                                                                                                                                                                                                                                                                                                |
| Jiang et al., 2019 <sup>72</sup>            | Not standard TENS - Cefaly                                                         | Evaluated efficacy and safety of combination therapy of flunarizine plus transcutaneous supraorbital neurostimulation (tSNS) compared with either flunarizine or tSNS alone for migraine prophylaxis                                                                                                                                                                                                                                                                                                                        |
| Juarez-Albuixech et al., 2019 <sup>73</sup> | Not RCT                                                                            | Evaluated efficacy of Volta Therapy and transcutaneous electrical nerve stimulation (TENS) in the treatment of lumbosciatica                                                                                                                                                                                                                                                                                                                                                                                                |

## 10\_OL-TABLE3\_ExcludedStudies

| Reference                           | Reason for exclusion                                                                                                                                         | Description of study                                                                                                                                                                                                                                                                                                                                                                                                                                                                                                                                                                                                       |
|-------------------------------------|--------------------------------------------------------------------------------------------------------------------------------------------------------------|----------------------------------------------------------------------------------------------------------------------------------------------------------------------------------------------------------------------------------------------------------------------------------------------------------------------------------------------------------------------------------------------------------------------------------------------------------------------------------------------------------------------------------------------------------------------------------------------------------------------------|
| Junger et al., 2008 <sup>74</sup>   | Not standard TENS - microcurrent electrical stimulation                                                                                                      | Evaluated Local therapy and treatment costs of chronic, venous leg ulcers treated with electrical stimulation using a Dermapulse device (Gerromed, Hamburg, Germany) delivering currents with varying polarity at a pulse frequency of 128 Hz and an average current strength of 300 microamperes (initially 300 mA, if pain or paraesthesia was noted, it was reduced)                                                                                                                                                                                                                                                    |
| Kaplan et al., 1994 <sup>75</sup>   | Not an RCT                                                                                                                                                   | Evaluated TENS for dysmenorrhea. Open label single group without a comparison group                                                                                                                                                                                                                                                                                                                                                                                                                                                                                                                                        |
| Katz and Melzack 1991 <sup>76</sup> | TENS delivered to acupuncture points distant to pain                                                                                                         | Evaluated low frequency high intensity auricular TENS for phantom limb pain.                                                                                                                                                                                                                                                                                                                                                                                                                                                                                                                                               |
| Kempf et al., 2018 <sup>77</sup>    | Not standard TENS – H wave                                                                                                                                   | Evaluated short-term application of High-Tone Electrical Muscle Stimulation (HTEMS) compared to Transcutaneous Electrical Nerve Stimulation (TENS) with chronic sciatica.                                                                                                                                                                                                                                                                                                                                                                                                                                                  |
| Kho et al., 1991 <sup>78</sup>      | Unable to isolate TENS effects                                                                                                                               | Evaluated transcutaneous stimulation combined with acupuncture for surgery for retroperitoneal lymph node dissection major surgery. Not possible to isolate the effects of TENS from those of acupuncture                                                                                                                                                                                                                                                                                                                                                                                                                  |
| Kocyigit et al., 2012 <sup>79</sup> | Not an RCT – experimental study                                                                                                                              | Evaluated effects of Low-frequency Transcutaneous Electrical Nerve Stimulation on Central Pain Modulation in patients with subacromial impingement syndrome of the shoulder. The experimental paradigm was to evaluate pain-induced activation in the brain during low-frequency TENS application in response to experimentally induced painful stimuli although the nature of the stimuli unclear “ <i>The involved arm of the patient was grasped by the researcher</i> ”                                                                                                                                                |
| Kolen et al., 2012 <sup>80</sup>    | Not standard TENS device or electrodes                                                                                                                       | Evaluated different ways of delivering TENS for osteoarthritis of the knee. Used a prototype TENS device with a matrix electrode array.                                                                                                                                                                                                                                                                                                                                                                                                                                                                                    |
| Kolu et al., 2018 <sup>81</sup>     | Unable to isolate TENS effects                                                                                                                               | Evaluated transcutaneous nerve stimulation combined with high-intensity laser therapy and ultrasound treatment in patients with chronic lumbar radiculopathy. Not possible to isolate TENS                                                                                                                                                                                                                                                                                                                                                                                                                                 |
| Koo et al., 2015 <sup>82</sup>      | Unable to isolate TENS effects                                                                                                                               | Evaluated Noxipoint Therapy to conventional physiotherapy that consisted of TENS, exercise, and manual and heat therapies for the treatment of chronic neck and shoulder. Noxipoint Therapy is a modified technique to deliver TENS over tender muscle points to produce a sore pain and does not meet our criteria for standard TENS and the comparator group included TENS combined with other treatments                                                                                                                                                                                                                |
| Kumar et al., 1997 <sup>83</sup>    | Not standard TENS – H-wave therapy                                                                                                                           | Evaluated transcutaneous electrostimulation for chronic painful peripheral neuropathy. The authors state “Electrotherapy was given by a portable, rechargeable unit, the H-Wave machine (Electronic Waveform Lab, Huntington Beach, CA), which has output parameters that are distinct from the other available transcutaneous electrical nerve stimulation (TENS) modalities.” P 1703 Current is biphasic, exponentially decaying waveform with pulse widths of 4 ms and $\leq 35$ V The electric current strength varies with voltage setup to a maximum of 35 mA, and the pulse frequency is user adjustable (2-70 Hz). |
| Kumar et al., 1998 <sup>84</sup>    | Not standard TENS - H-wave therapy                                                                                                                           | Evaluated transcutaneous electrostimulation for chronic painful peripheral neuropathy using H-Wave device with parameters distinct from standard TENS.                                                                                                                                                                                                                                                                                                                                                                                                                                                                     |
| Labrune et al., 2015 <sup>85</sup>  | No pain outcomes                                                                                                                                             | Evaluated randomized placebo control study to determine whether applying TENS before exercise in PAD patients could delay onset of pain and lead to longer walking distances                                                                                                                                                                                                                                                                                                                                                                                                                                               |
| Lan et al., 2012 <sup>86</sup>      | TENS delivered to acupuncture points distant to pain                                                                                                         | Evaluated TENS on six acupuncture points for pain after total hip arthroplasty for elderly patients. Acupuncture points were generally distant to the site of pain (bilateral P6 on anterior surface of the forearm; L14 on dorsum of hand; ipsilateral to the surgery ST36 anterior crest of the tibia; GB31 between greater trochanter of femur and hiatus of sacrum).                                                                                                                                                                                                                                                   |
| Lanham et al., 1984 <sup>87</sup>   | Not an RCT                                                                                                                                                   | Evaluated TENS combined with hypothermia in podiatric surgery by describing a series of 69 patients that received treatment. There was no comparison group                                                                                                                                                                                                                                                                                                                                                                                                                                                                 |
| Lee et al., 1997 <sup>88</sup>      | Not standard TENS - medium frequency AC plus galvanic                                                                                                        | Evaluated electrical stimulation for pain associated with myofascial trigger points. The type of current was a combination of medium-frequency AC current and Galvanic current at a frequency of 50-100Hz Not standard TENS - combination of medium frequency AC plus galvanic                                                                                                                                                                                                                                                                                                                                             |
| Lee et al., 2015 <sup>89</sup>      | Unable to isolate TENS effects                                                                                                                               | Evaluated effect of a device combining high-frequency transcutaneous electrical nerve stimulation and thermotherapy (I-Rune I-200L, Midirune Co.) for primary dysmenorrhea. Not possible to isolate TENS because TENS and thermal therapies combined                                                                                                                                                                                                                                                                                                                                                                       |
| Lehmann et al., 1983 <sup>90</sup>  | Not standard TENS characteristics – delivered below sensory detection threshold (subthreshold TENS – reporting data from same sample as Lehmann et al., 1986 | Evaluated subthreshold TENS versus placebo TENS and electroacupuncture for chronic low back pain. Analysis of nonorganic findings.                                                                                                                                                                                                                                                                                                                                                                                                                                                                                         |
| Lehmann et al., 1986 <sup>91</sup>  | Not standard TENS characteristics – delivered below sensory detection threshold (subthreshold TENS – probably reporting same data as Lehmann et al., 1983    | Evaluated subthreshold TENS versus placebo TENS and electroacupuncture for chronic low back pain. Analysis of efficacy.                                                                                                                                                                                                                                                                                                                                                                                                                                                                                                    |

10\_OL-TABLE3\_ExcludedStudies

| Reference                                                                                                                                                                                                                                                               | Reason for exclusion                                                                                          | Description of study                                                                                                                                                                                                                                                                                                                                                                                                                                                                                                                                                                                                                                         |
|-------------------------------------------------------------------------------------------------------------------------------------------------------------------------------------------------------------------------------------------------------------------------|---------------------------------------------------------------------------------------------------------------|--------------------------------------------------------------------------------------------------------------------------------------------------------------------------------------------------------------------------------------------------------------------------------------------------------------------------------------------------------------------------------------------------------------------------------------------------------------------------------------------------------------------------------------------------------------------------------------------------------------------------------------------------------------|
| 1<br>2<br>3<br>4<br>5<br>6<br>7<br>8<br>9<br>10<br>11<br>12<br>13<br>14<br>15<br>16<br>17<br>18<br>19<br>20<br>21<br>22<br>23<br>24<br>25<br>26<br>27<br>28<br>29<br>30<br>31<br>32<br>33<br>34<br>35<br>36<br>37<br>38<br>39<br>40<br>41<br>42<br>43<br>44<br>45<br>46 |                                                                                                               |                                                                                                                                                                                                                                                                                                                                                                                                                                                                                                                                                                                                                                                              |
| 92<br>93<br>94<br>95<br>96<br>97<br>98<br>99<br>100<br>101<br>102<br>103<br>104<br>105<br>106<br>107<br>108<br>109<br>110<br>111                                                                                                                                        |                                                                                                               |                                                                                                                                                                                                                                                                                                                                                                                                                                                                                                                                                                                                                                                              |
| 92                                                                                                                                                                                                                                                                      | Not full report – Abstract of conference poster                                                               | Evaluated TENS for pain control during first-trimester abortion.                                                                                                                                                                                                                                                                                                                                                                                                                                                                                                                                                                                             |
| 93                                                                                                                                                                                                                                                                      | Not standard TENS - TEAS                                                                                      | Explored effect and mechanisms of TEA on postoperative recovery after caesarean section                                                                                                                                                                                                                                                                                                                                                                                                                                                                                                                                                                      |
| 94                                                                                                                                                                                                                                                                      | Not standard TENS – TEAS delivered to acupuncture points                                                      | Evaluated regulatory effects of acupoint electric stimulation on the analgesic substances and the relevant indices of nerve-immunity-endocrine system in the patients undergoing general anaesthesia anorectal operation                                                                                                                                                                                                                                                                                                                                                                                                                                     |
| 95                                                                                                                                                                                                                                                                      | Not standard TENS - transcutaneous electric acupoint stimulation                                              | Evaluated transcutaneous electrical acupuncture stimulation combined with sufentanil anaesthesia for intraoperative and postoperative supratentorial craniotomy. Electrodes applied at five pairs of acupuncture points: Hegu (LI4) and Waiguan (TE5), Jinmen (BL63) and Taichong (LR3), Zusanli (ST36) and Qiuxu (GB 40), and Fengchi (GB20) with Tianzhu (BL10) and Cuanzhu (BL2) with Yuyao (EX-HN4) on the craniotomy side and currents delivered using a Han's acupoint nerve stimulator (LH202H, Beijing Huawei Co, Ltd, Beijing, China) with a dense-disperse frequency of 2/100 Hz (alternated once every 3 s; 0.6 ms at 2 Hz and 0.2 ms at 100 Hz). |
| 96                                                                                                                                                                                                                                                                      | Not an RCT                                                                                                    | Evaluated TENS for various chronic pains. No comparison groups                                                                                                                                                                                                                                                                                                                                                                                                                                                                                                                                                                                               |
| 97                                                                                                                                                                                                                                                                      | Not an RCT                                                                                                    | Evaluated TENS for osteoarthritis of the knee. Authors state " <i>The results of this non-randomised controlled single-blind continuous trial ....</i> " p481                                                                                                                                                                                                                                                                                                                                                                                                                                                                                                |
| 98                                                                                                                                                                                                                                                                      | TENS on remote acupuncture points                                                                             | Evaluated the efficacy of transcutaneous electrical nerve stimulation (TENS) versus lidocaine in the relief of episiotomy pain                                                                                                                                                                                                                                                                                                                                                                                                                                                                                                                               |
| 99                                                                                                                                                                                                                                                                      | Not standard TENS - transcutaneous electric acupoint stimulation                                              | Evaluated transcutaneous acupoint electrical stimulation combined with sufentanil pre-treatment on incidence and severity of etomidate-induced myoclonus delivered bilaterally, at hegu and waiguan acupoints (on arm) using to 2/100Hz "dilatational waves". Acupoint not covering painful site                                                                                                                                                                                                                                                                                                                                                             |
| 100                                                                                                                                                                                                                                                                     | Not standard TENS - transcutaneous spinal electroanalgesia and TENS control group not applied at site of pain | Evaluated Transcutaneous Spinal Electroanalgesia for Chronic Pain. Used TENS as a control for comparison but stated "Normally one would not apply TENS to these locations" p656                                                                                                                                                                                                                                                                                                                                                                                                                                                                              |
| 101                                                                                                                                                                                                                                                                     | Not clinical pain - sample of pain-free participants                                                          | Evaluated TENS on experimentally induced delayed onset muscle soreness in Amateur Athletes                                                                                                                                                                                                                                                                                                                                                                                                                                                                                                                                                                   |
| 102                                                                                                                                                                                                                                                                     | Not TENS                                                                                                      | Evaluated radiological changes after combining static stretching and transcutaneous electrical stimulation of the plantar fascia in adults with idiopathic cavus foot                                                                                                                                                                                                                                                                                                                                                                                                                                                                                        |
| 103                                                                                                                                                                                                                                                                     | No pain outcomes - Not treating pain                                                                          | Evaluated effectiveness of a hybrid training system with walking that simultaneously applies electrical stimulation to the knee extensors/flexors during walking in obese women with knee pain                                                                                                                                                                                                                                                                                                                                                                                                                                                               |
| 104                                                                                                                                                                                                                                                                     | No pain outcomes - Not pain                                                                                   | Evaluated efficacy and safety of TNS for Attention-Deficit/Hyperactivity Disorder and potential changes in brain spectral power using resting state quantitative electroencephalography                                                                                                                                                                                                                                                                                                                                                                                                                                                                      |
| 105                                                                                                                                                                                                                                                                     | Not standard TENS - transcutaneous electric acupoint stimulation                                              | Evaluated transcutaneous electric acupoint stimulation as adjunctive treatment for opioid detoxification using a Han's Acupoint Nerve Stimulator to deliver currents to "hegu" and "neiguan" acupoints on dorsal and palmar surface of one hand, and dorsal and ventral surface of the other forearm. Frequency of stimulation alternated between 2 and 100 Hz at 3-second intervals. Primary outcome was opioid consumption although physical pain in past 24 hours assessed using the Brief Pain Inventory was a secondary outcome.                                                                                                                        |
| 106                                                                                                                                                                                                                                                                     | TENS administered internally – intra-oral                                                                     | Evaluated transcutaneous electronic nerve stimulation for discomfort associated with regional anaesthesia in dentistry using an injection-assist TENS machine (3M, St Paul, Minnesota, USA) with electrodes positioned in the mouth either side of the needle puncture point.                                                                                                                                                                                                                                                                                                                                                                                |
| 107                                                                                                                                                                                                                                                                     | Not standard TENS device and electrodes                                                                       | Evaluated TENS for various chronic pains using a Grass model S8 stimulator and EEG disc electrode to deliver currents                                                                                                                                                                                                                                                                                                                                                                                                                                                                                                                                        |
| 108                                                                                                                                                                                                                                                                     | Not an RCT - "Patients were assigned alternately, as they arrived at the clinic, to each order of treatment." | Evaluated TENS versus ice massage in patients with chronic low back pain                                                                                                                                                                                                                                                                                                                                                                                                                                                                                                                                                                                     |
| 109                                                                                                                                                                                                                                                                     | Not standard TENS - transcutaneous electric acupoint stimulation                                              | Evaluated the effect of transcutaneous electrical acupoint stimulation (TEAS) on the quality of recovery during the early period after laparoscopic cholecystectomy and the dosage of anaesthetic and analgesic                                                                                                                                                                                                                                                                                                                                                                                                                                              |
| 110                                                                                                                                                                                                                                                                     | Not an RCT                                                                                                    | Evaluated TENS for labour Pain. Not prospective randomisation -patients were given TENS and followed. Then retrospectively they were compared with a sample taken from patients who had not received TENS - EXCLUDE AS NOT RADMOSIED                                                                                                                                                                                                                                                                                                                                                                                                                         |
| 111                                                                                                                                                                                                                                                                     | No pain outcomes                                                                                              | Evaluated effect of TENS on electromyographic and kinesiographic activity in patients with temporomandibular disorder. No pain outcomes                                                                                                                                                                                                                                                                                                                                                                                                                                                                                                                      |

## 10\_OL-TABLE3\_ExcludedStudies

| Reference                                  | Reason for exclusion                                                                                                           | Description of study                                                                                                                                                                                                                                                                                                                                                                                                                                                                                                                                                                                       |
|--------------------------------------------|--------------------------------------------------------------------------------------------------------------------------------|------------------------------------------------------------------------------------------------------------------------------------------------------------------------------------------------------------------------------------------------------------------------------------------------------------------------------------------------------------------------------------------------------------------------------------------------------------------------------------------------------------------------------------------------------------------------------------------------------------|
| Mucuk and Baser, 2014 <sup>112</sup>       | Not standard TENS - TENS-acupuncture pen                                                                                       | Evaluated non-invasive electroacupuncture on labour pain using a TENS-acupuncture pen with a maximum output of 0.6mA administered to acupuncture points LI4 (hand)SP6 (leg/foot)                                                                                                                                                                                                                                                                                                                                                                                                                           |
| Mummolo et al., 2019 <sup>113</sup>        | Not RCT – retrospective evaluation                                                                                             | Evaluated effects of ultra-low-frequency transcutaneous electrical nerve stimulation (ULF-TENS) on pain and electromyographic values in subjects affected by temporomandibular disorder                                                                                                                                                                                                                                                                                                                                                                                                                    |
| Murina et al., 2008 <sup>114</sup>         | TENS administered internally - intravaginal                                                                                    | Evaluated TENS to treat vestibulodynia using a dual channel portable TENS unit (YSY-EST device) and a commercially available plastic vaginal probe with two gold metallic transversal rings as electrodes (Periprobe VAG2ST Beac, Pavia, Italy) inserted 20 mm into the vagina                                                                                                                                                                                                                                                                                                                             |
| Murina et al., 2018 <sup>115</sup>         | TENS administered internally - intravaginal                                                                                    | Evaluated TENS plus diazepam to treat vestibulodynia using a dual channel portable TENS unit (NeuroTrac Continence; VerityMedical, London, UK) and a commercially available plastic vaginal probe with two gold metallic transversal rings (Periprobe VAG2ST Beac, Pavia, Italy) inserted 20 mm into the vagina                                                                                                                                                                                                                                                                                            |
| Mysliwiec et al., 2011 <sup>116</sup>      | No pain outcomes                                                                                                               | Evaluated effect of cervical traction and TENS on strength of painless grip                                                                                                                                                                                                                                                                                                                                                                                                                                                                                                                                |
| Naeser et al., 2002 <sup>117</sup>         | Not standard TENS – microcurrent electrical stimulation                                                                        | Evaluated carpal tunnel syndrome pain treated with low-level laser and microamperes transcutaneous electric nerve stimulation                                                                                                                                                                                                                                                                                                                                                                                                                                                                              |
| Nakano et al., 2019 <sup>118</sup>         | Not RCT                                                                                                                        | Evaluated effects of TENS on pain and other physical symptoms in 20 in-patients with advanced cancer receiving palliative care                                                                                                                                                                                                                                                                                                                                                                                                                                                                             |
| Ngai et al., 2010 <sup>119</sup>           | Not clinical pain                                                                                                              | Evaluated Acu-TENS on functional capacity and beta-endorphin level in subjects with chronic obstructive pulmonary disease                                                                                                                                                                                                                                                                                                                                                                                                                                                                                  |
| Noehren et al., 2015 <sup>120</sup>        | Protocol – ongoing study                                                                                                       | Protocol of an RCT to evaluate TENS for fibromyalgia: a double-blind randomized clinical trial. Full RCT published <b>after our search</b> Dailey et al., 2019 <i>Arthritis Rheumatol.</i> 2019 Nov 18. doi: 10.1002/art.41170.                                                                                                                                                                                                                                                                                                                                                                            |
| Nourbakhsh and Fearon, 2008 <sup>121</sup> | Not standard TENS device or electrodes                                                                                         | Evaluation of noxious level electrical stimulation on chronic lateral epicondylitis administered using a MRL Neuroprobe System V (CR Kesner Company, Geneva, IL, USA) as painful stimulation of trigger points for 30s using 4Hz interrupted DC current and a probe electrode                                                                                                                                                                                                                                                                                                                              |
| Okonkwo et al., 2018 <sup>122</sup>        | Not an RCT                                                                                                                     | Evaluation of TENS for post-injection sciatic pain in a non-randomized controlled clinical trial.                                                                                                                                                                                                                                                                                                                                                                                                                                                                                                          |
| Oyibo et al., 2004 <sup>123</sup>          | Not standard TENS - microcurrent electrical stimulation                                                                        | Evaluated electrical stimulation therapy through silver-plated nylon-Dacron™ stocking electrodes (Micro-Z, Prizm Medical, Duluth, GA, USA) for painful diabetic neuropathy. Pulsed electric current were delivered a subsensory dose approximately 50 micro amps at 80 pulses per second for the first 10 min, then 8 pulses per second for the next 10 min each hour over an 8-h period.                                                                                                                                                                                                                  |
| Ozen et al., 2019 <sup>124</sup>           | Cannot isolate TENS - hotpack, transcutaneous electrical nerve stimulation (TENS), and ultrasound                              | Evaluated effects of physiotherapy modalities with those of acupuncture on pain, daily function, and quality of life in FMS patients.                                                                                                                                                                                                                                                                                                                                                                                                                                                                      |
| Park et al., 2014 <sup>125</sup>           | No pain outcomes                                                                                                               | Evaluated TENS with exercise on spasticity, balance, and gait in patients with chronic stroke. No pain outcomes.                                                                                                                                                                                                                                                                                                                                                                                                                                                                                           |
| Patel et al., 2016 <sup>126</sup>          | Unable to isolate TENS effects                                                                                                 | Evaluated TENS with McKenzie method for lumbar radiculopathy. Not possible to isolate the effects of TENS from McKenzie                                                                                                                                                                                                                                                                                                                                                                                                                                                                                    |
| Peng et al., 2010 <sup>127</sup>           | Not an RCT                                                                                                                     | Evaluated TENS on Acupoints for labour pain. Stated a Non-randomized Controlled Study                                                                                                                                                                                                                                                                                                                                                                                                                                                                                                                      |
| Polat et al., 2017 <sup>128</sup>          | Not an RCT                                                                                                                     | Evaluated TENS combined with hot pack and home exercise program for osteoarthritis of the knee with and without neuropathic pain. There was no comparison intervention                                                                                                                                                                                                                                                                                                                                                                                                                                     |
| Pope et al., 1994 <sup>129</sup>           | Not standard TENS - neuromuscular electrical stimulation                                                                       | Evaluated transcutaneous muscle stimulation for sub-acute low back pain using a Myocare PLUS device which is considered to be a neuromuscular stimulator and thus excluded. Note: Currents produced physiological stimulation that could be considered within the scope of 'standard TENS' Biphasic pulses 37pps pulse duration 225 us with pulse amplitude modulated (ramped up in 2 s held for 6s then ramped off in 2s ... then a pause before cycle repeated. 4 electrodes placed on back around pain and current delivered to maintain sensation as high as possible – no mention of muscle twitching |
| Pour et al., 2012 <sup>130</sup>           | TENS applied to acupuncture points away from painful area [TENS applied to acupuncture points on foot and SP6 for labour pain] | Evaluated effect of two methods of compressive medicine and electrical stimulation of the skin on the severity of labour pains in the first pregnant women.                                                                                                                                                                                                                                                                                                                                                                                                                                                |
| Quinton et al., 1987 <sup>131</sup>        | Some participants not adults                                                                                                   | Evaluated TENS in acute hand infections. Sample included at least one child under 16years of age (age range from 15 to 66 years).                                                                                                                                                                                                                                                                                                                                                                                                                                                                          |
| Radhakrishna et al., 2020 <sup>132</sup>   | TENS applied pre-emptive before general surgery and pain measured post operatively without TENS                                | Evaluated the effect of immediate preoperative TENS on intraoperative anaesthetic drug consumption in patients undergoing lumbar discectomy under general anaesthesia                                                                                                                                                                                                                                                                                                                                                                                                                                      |

10\_OL-TABLE3\_ExcludedStudies

| Reference                                       | Reason for exclusion                                                                                  | Description of study                                                                                                                                                                                                                                                                                                                                                                                                                                                                                                                                                                                                                                                                                                                                                                                                                                                                                                                                             |
|-------------------------------------------------|-------------------------------------------------------------------------------------------------------|------------------------------------------------------------------------------------------------------------------------------------------------------------------------------------------------------------------------------------------------------------------------------------------------------------------------------------------------------------------------------------------------------------------------------------------------------------------------------------------------------------------------------------------------------------------------------------------------------------------------------------------------------------------------------------------------------------------------------------------------------------------------------------------------------------------------------------------------------------------------------------------------------------------------------------------------------------------|
| Rapoport et al., 2019 <sup>133</sup>            | Not TENS - secondary report of Yartisky                                                               | Performed a post-hoc analysis on a subgroup of participants with migraine from a randomized, double-blind, parallel-group, sham-controlled, multicentre study                                                                                                                                                                                                                                                                                                                                                                                                                                                                                                                                                                                                                                                                                                                                                                                                    |
| Razavi and Jansen, 2004 <sup>134</sup>          | Not standard TENS - placebo TENS only                                                                 | Evaluated acupuncture and placebo TENS in addition to exercise in treatment of rotator cuff tendinitis. No active TENS intervention.                                                                                                                                                                                                                                                                                                                                                                                                                                                                                                                                                                                                                                                                                                                                                                                                                             |
| Reich et al., 1989 <sup>135</sup>               | Unable to isolate TENS effects                                                                        | Evaluated various non-invasive treatments for vascular and muscle contraction headache including an 'Electrical Group' that received either traditional TENS or electrical neurotransmitter modulation, either singly or in combination. Data was analysed at group rather than modality level.                                                                                                                                                                                                                                                                                                                                                                                                                                                                                                                                                                                                                                                                  |
| Reichstein et al., 2005 <sup>136</sup>          | Not standard TENS – H wave characteristics delivered using a CEFAR Dumo TENS device                   | Evaluated effects of high-frequency external muscle stimulation (HF) with those of TENS in patients with diabetic distal symmetrical sensory polyneuropathy.                                                                                                                                                                                                                                                                                                                                                                                                                                                                                                                                                                                                                                                                                                                                                                                                     |
| Rodriguez-Fernandez et al., 2011 <sup>137</sup> | Not clinical pain - sample of pain-free participants                                                  | Evaluated burst-type TENS on cervical range of motion and latent myofascial trigger point sensitivity in a sample of individuals recruited from a pain-free population with at least 1 latent myofascial trigger point in their upper trapezius. Sample not recruited from clinical pain population.                                                                                                                                                                                                                                                                                                                                                                                                                                                                                                                                                                                                                                                             |
| Rooney et al., 1986 <sup>138</sup>              | No pain outcomes                                                                                      | Evaluated cryoanalgesia and TENS on pulmonary function tests post thoracotomy. No pain outcome                                                                                                                                                                                                                                                                                                                                                                                                                                                                                                                                                                                                                                                                                                                                                                                                                                                                   |
| Roth and Thrash, 1986 <sup>139</sup>            | Not standard TENS - microampere currents, and not standard electrodes and invasive technique          | Evaluated TENS for pain associated with orthodontic tooth movement. In one group TENS was applied externally over zygomatic arches using sponge pad electrodes – not standard TENS electrodes (0.5 Hz with an intensity of 500 mA). In one group TENS was applied internally (intraoral) directly to teeth using one probe electrode on the crown of each tooth and the other electrode on the palatal mucosa adjacent to the tooth (0.5 Hz, intensity of 50 mA) – Internal Currents were delivered using Alpha-Stim model 2000 which produces a biphasic waveform with varying pulse widths in the millisecond range and intensities in the microampere range (i.e. microcurrent). It is probable that 500mA and 50mA were typographical errors that should read 500 microampere and 50 microamperes. "Both groups were told that the intensity of the current was so small that the most they would feel was a very slight tingling, if anything at all." p133 |
| Santiesteban et al., 1985 <sup>140</sup>        | TENS delivered to acupuncture points distant to pain                                                  | Evaluated TENS on acupuncture points for primary spasmodic dysmenorrhea using a MRL pain control system (5Hz, 250us, intensity to patient tolerance). Acupuncture points were not covering painful site (GB34, Sp6, (leg).                                                                                                                                                                                                                                                                                                                                                                                                                                                                                                                                                                                                                                                                                                                                       |
| Sari et al., 2019 <sup>141</sup>                | Unable to isolate TENS                                                                                | Evaluated intermittent pneumatic compression along with conventional treatment with cold pack treatment along with conventional treatment on clinical outcomes in patients with knee osteoarthritis                                                                                                                                                                                                                                                                                                                                                                                                                                                                                                                                                                                                                                                                                                                                                              |
| Schuster et al., 1980 <sup>142</sup>            | Not an RCT - 26 control patients were selected at random. Records were matched as closely as possible | Evaluated use of TENS and narcotic analgesics in relieving post-operative pain.                                                                                                                                                                                                                                                                                                                                                                                                                                                                                                                                                                                                                                                                                                                                                                                                                                                                                  |
| Schoenen et al., 2013 <sup>143</sup>            | Not standard TENS - supraorbital transcutaneous stimulator                                            | Evaluated trigeminal neurostimulation with a supraorbital transcutaneous stimulator (Cefaly, STX-Med., Herstal, Belgium) for migraine prevention. Neurostimulation delivered with one 30 mm 3x94 mm self-adhesive electrode on forehead and delivery of biphasic rectangular pulsed currents (250 µs, 60 Hz, 16 mA).                                                                                                                                                                                                                                                                                                                                                                                                                                                                                                                                                                                                                                             |
| Schomburg and Carter-Baker, 1983 <sup>144</sup> | Not an RCT                                                                                            | Evaluated TENS for post laparotomy pain compared with chart review to 75 patients who had undergone similar surgical procedures performed by the same surgeon before TENS postoperative pain management had been instituted.                                                                                                                                                                                                                                                                                                                                                                                                                                                                                                                                                                                                                                                                                                                                     |
| Selfe et al., 2008 <sup>145</sup>               | Not standard TENS - noninvasive interactive neurostimulation (InterX5000 device)                      | Evaluated Noninvasive Interactive Neurostimulation on Symptoms of Osteoarthritis of the Knee using an InterX5000 device (Neuro Resource Group, Plano, TX)                                                                                                                                                                                                                                                                                                                                                                                                                                                                                                                                                                                                                                                                                                                                                                                                        |
| Shirazi et al., 2014 <sup>146</sup>             | Not an RCT                                                                                            | Evaluated TENS on joint position sense in patients with knee joint osteoarthritis. Pre-post study without a comparison group.                                                                                                                                                                                                                                                                                                                                                                                                                                                                                                                                                                                                                                                                                                                                                                                                                                    |
| Silberstein et al., 2016 <sup>147</sup>         | Not standard TENS - 5KHz sine wave                                                                    | Evaluated non-invasive vagus nerve stimulation for chronic migraine headache prevention using low voltage 5KHz sine wave lasting 1 millisecond with such bursts repeated every 40 milliseconds (Electrocore Ltd)                                                                                                                                                                                                                                                                                                                                                                                                                                                                                                                                                                                                                                                                                                                                                 |
| Silberstein et al., 2016 <sup>148</sup>         | Not standard TENS - 5KHz sine wave                                                                    | Evaluated non-invasive vagus nerve stimulation for the acute cluster headache using low voltage 5KHz sine wave lasting 1 millisecond with such bursts repeated every 40 milliseconds (Electrocore Ltd)                                                                                                                                                                                                                                                                                                                                                                                                                                                                                                                                                                                                                                                                                                                                                           |
| Simon et al., 2015 <sup>149</sup>               | Not an RCT                                                                                            | Evaluated TENS for chronic axial low back pain on a single cohort stratified for age. Dose-response study with no other intervention comparison groups.                                                                                                                                                                                                                                                                                                                                                                                                                                                                                                                                                                                                                                                                                                                                                                                                          |
| Simpson and Ward, 2004 <sup>150</sup>           | Not standard TENS - transcutaneous spinal electroanalgesia                                            | Evaluated transcutaneous spinal electroanalgesia for pain from chronic critical limb ischemia. Transcutaneous spinal electroanalgesia uses two electrodes placed over dorsal spine and delivers currents that do not cause action potentials in peripheral nerves and no sensation of paraesthesia (4 us, 1800–2500 Hz, 100–300 V, Advanced Pain Management)                                                                                                                                                                                                                                                                                                                                                                                                                                                                                                                                                                                                     |



## 10\_OL-TABLE3\_ExcludedStudies

| Reference                                       | Reason for exclusion                                                      | Description of study                                                                                                                                                                                                                                                                                                                                                                                                                                                                                        |
|-------------------------------------------------|---------------------------------------------------------------------------|-------------------------------------------------------------------------------------------------------------------------------------------------------------------------------------------------------------------------------------------------------------------------------------------------------------------------------------------------------------------------------------------------------------------------------------------------------------------------------------------------------------|
| Solomon and Guglielmo, 1985 <sup>151</sup>      | Not standard TENS - microcurrent electrical stimulation                   | Evaluated TENS for headache using a device that "... differs from most other TENS equipment by its low amperage (maximum 4 milliamperes), high frequency (12,000 to 20,000 Hz rectified to monophasic wave form) and short pulse width (approximately 30 microsec)" p 12                                                                                                                                                                                                                                    |
| Solomon et al., 1989 <sup>152</sup>             | Not standard TENS - microcurrent electrical stimulation                   | Evaluated Cranial Electrotherapy in the Treatment of Tension Headache using "... extremely low level, high frequency current applied transcranially" – microcurrent p 445                                                                                                                                                                                                                                                                                                                                   |
| Sonde et al., 2000 <sup>153</sup>               | No pain outcomes                                                          | Evaluated TENS for post-stroke paretic arm on functional outcomes including spasticity and activities of daily function but not pain                                                                                                                                                                                                                                                                                                                                                                        |
| Stralka et al., 1998 <sup>154</sup>             | Not standard TENS - high voltage pulsed direct current                    | Evaluated high voltage pulsed direct current built into a wrist splint for hand and wrist pain                                                                                                                                                                                                                                                                                                                                                                                                              |
| Stratton and Smith, 1980 <sup>155</sup>         | No pain outcomes                                                          | Evaluated TENS for postoperative thoracotomy on ventilatory function including forced vital capacity but not pain                                                                                                                                                                                                                                                                                                                                                                                           |
| Strayhorn et al., 1983 <sup>156</sup>           | Not an RCT                                                                | Evaluated TENS on use of narcotic analgesics and occurrence of postoperative complications following gastric bypass surgery for control of obesity from chart review                                                                                                                                                                                                                                                                                                                                        |
| Sun et al., 2017 <sup>157</sup>                 | Not standard TENS - transcutaneous electric acupoint stimulation          | Evaluated Perioperative Transcutaneous Electrical Acupoint Stimulation for Postoperative Pain Relief Following Laparoscopic Surgery using a HANS Acupoint Nerve Stimulator (HANS-200A, Nanjing Jisheng Medical Technology Company, Nanjing, China) delivering an alternating dense and disperse stimulation (2Hz (0.6 ms pulse width) alternated with 100 Hz stimulation (0.2 ms pulse width) every 3 seconds to maximum current tolerated but subnoxious) to Hegu (LI4) and Neiguan (P6) distant from pain |
| Sunshine et al., 1996 <sup>158</sup>            | Not standard TENS – microcurrent electrical stimulation                   | Evaluated microcurrent TENS and massage for fibromyalgia (Electroacroscope device)                                                                                                                                                                                                                                                                                                                                                                                                                          |
| Takla and Rezk-Allah, 2018 <sup>159</sup>       | Not standard TENS - combination therapy, unable to isolate effect of TENS | Evaluated simultaneous application of TENS and ultrasound phonophoresis on active myofascial trigger points as a combined therapy using an Intellect Advanced Combo therapy system (2752CC; Chattanooga DJO France SAS Industries; Mexico) device. Using an ultrasound treatment head as an electrode and not possible to isolate TENS - Combined therapy                                                                                                                                                   |
| Takla et al., 2018 <sup>160</sup>               | Not standard TENS - combination therapy, unable to isolate effect of TENS | Evaluated low-frequency high-intensity versus medium-frequency low-intensity TENS delivered as combined therapy with ultrasound phonophoresis for management of active myofascial trigger points using an Intellect Advanced Combo therapy system (2752CC; Chattanooga DJO France SAS Industries; Mexico) device. Using an ultrasound treatment head as an electrode and not possible to isolate TENS - Combined therapy                                                                                    |
| Thiese et al., 2013 <sup>161</sup>              | Not an RCT                                                                | Evaluated electrical stimulation for chronic non-specific low back pain in a working-age population – Report of a Protocol                                                                                                                                                                                                                                                                                                                                                                                  |
| Thompson et al., 2008 <sup>162</sup>            | Not standard TENS - transcutaneous spinal electroanalgesia                | Evaluated transcutaneous spinal electroanalgesia (TSE) on low back pain. "...TSE bears a superficial resemblance to transcutaneous electrical nerve stimulation (TENS) but differs in that it is applied to the skin overlying the vertebral spine and uses stimulation frequencies far higher (2500+ Hz) than those used for TENS (circa 1–150 Hz).... The pulse widths used for the two systems are also substantially different (4 ls for TSE compared with 50–200 ls for TENS)."                        |
| Tok et al., 2011 <sup>163</sup>                 | Unable to isolate TENS effects                                            | Evaluated electrical stimulation combined with continuous passive motion on symptoms, functional capacity, quality of life and balance in knee osteoarthritis. Combination therapy not possible to isolate contribution of TENS.                                                                                                                                                                                                                                                                            |
| Tousignant-Laflamme et al., 2017 <sup>164</sup> | Not an RCT - only one intervention                                        | Evaluated acupuncture-like TENS for chronic low back pain. Design was a randomized, crossover study to determine the duration of analgesia following 15- and 30-minute treatment. No comparison intervention group.                                                                                                                                                                                                                                                                                         |
| Tu et al., 2019 <sup>165</sup>                  | TENS delivered to acupuncture points distant to pain                      | Evaluated transcutaneous electrical acupoint stimulation on postoperative analgesia after ureteroscopic lithotripsy delivered to bilateral Shenyu (BL23) outside spinous process of L2 and SP9 between posterior tibia border and gastrocnemius muscle using a HANS LH-202 electrical stimulator.                                                                                                                                                                                                           |
| Vance et al., 2018 <sup>166</sup>               | Not an RCT                                                                | Development of a method to maximize intensity of TENS used for fibromyalgia by analysing baseline data from an ongoing clinical RCT investigating the effects of TENS in women with fibromyalgia – the Fibromyalgia Activity Study with TENS (FAST; NCT01888640).                                                                                                                                                                                                                                           |
| VanderArk and McGrath, 1975 <sup>167</sup>      | Some participants not adults                                              | Evaluated TENS for post-operative pain. Some participants were not adults (13 years to 87 years).                                                                                                                                                                                                                                                                                                                                                                                                           |
| Vincenti et al., 1982 <sup>168</sup>            | Not an RCT                                                                | Evaluated TENS for labour pain.                                                                                                                                                                                                                                                                                                                                                                                                                                                                             |
| Vinterberg et al. 1978 <sup>169</sup>           | Not an RCT                                                                | Evaluated TENS for rheumatoid arthritis.                                                                                                                                                                                                                                                                                                                                                                                                                                                                    |



## 10\_OL-TABLE3\_ExcludedStudies

| Reference                                      | Reason for exclusion                                                               | Description of study                                                                                                                                                                                                                                                                                                                                                                       |
|------------------------------------------------|------------------------------------------------------------------------------------|--------------------------------------------------------------------------------------------------------------------------------------------------------------------------------------------------------------------------------------------------------------------------------------------------------------------------------------------------------------------------------------------|
| Wang et al., 1988 <sup>170</sup>               | Some participants not adults                                                       | Evaluated TENS for sickle cell pain crises. Some participants were not adults (12years to 27 years)                                                                                                                                                                                                                                                                                        |
| Wang, 1997 <sup>171</sup>                      | Not standard TENS - transcutaneous electric acupoint stimulation                   | Evaluated transcutaneous electrical acupoint stimulation on analgesic consumption post operation lower abdomen surgery at acupuncture points (Hegu (LI14) and either side of the incision site) using dense-disperse current.                                                                                                                                                              |
| Wang et al., 2007 <sup>172</sup>               | Not standard TENS - acupuncture acupoint stimulator                                | Evaluated TENS applied to acupoints for labour pain using an acupuncture acupoint stimulator (G-6502-2A). Acupuncture points LI4 PC6 SP6 LR3 not at site of pain.                                                                                                                                                                                                                          |
| Wang et al., 2007 <sup>173</sup>               | TENS delivered to acupuncture points distant to pain                               | Evaluated abdominal acupuncture TENS on leg shoulder loin and neck pain using acupuncture points that are distant from pain LI4 PC6 SP6 LR3 – in Chinese Excluded based on abstract.                                                                                                                                                                                                       |
| Wang et al., 2007 <sup>174</sup>               | Not standard TENS - 'pen shaped' electrodes                                        | Evaluated acupuncture-like electrical stimulation on chronic tension-type headache using a 'pen shaped' electrode with a tip diameter of 1mm delivering dense-and-disperse currents (TAO, MibiTech ApS, Helsingør, Denmark) to six acupoints distant to the pain , bilateral EX-HN5, GB 20, LI 4                                                                                           |
| Wang et al., 2008 <sup>175</sup>               | Not standard TENS - transcutaneous electric acupoint stimulation                   | Evaluated pre and during surgery TEAS on blood bioactive compounds involving cerebral injury during craniotomy at LI4, LI11 ST36 SP6 distant to pain not at site of pain. No pain measure in Chinese Excluded based on abstract.                                                                                                                                                           |
| Wang et al., 2009 <sup>176</sup>               | Not standard TENS - transcutaneous electric acupoint stimulation                   | Wang, Z. X. (2009) Clinical observation on electroacupuncture at acupoints for treatment of senile radical sciatica. [Chinese]. Zhongguo zhen jiu = Chinese acupuncture & moxibustion 29 (2), 126-128.                                                                                                                                                                                     |
| Wang et al., 2014 <sup>177</sup>               | Not standard TENS - transcutaneous electric acupoint stimulation                   | Evaluated transcutaneous electric acupoint stimulation on intra-operative remifentanyl consumption and postoperative side-effects in patients undergoing sinusotomy delivered to Hegu (LI4), Neiguan (PC6), and Zusanli (ST36) a 6–9mA, 2/10 Hz before anaesthesia.                                                                                                                        |
| Ward et al., 2009 <sup>178</sup>               | Not clinical pain - sample of pain-free participants                               | Evaluated A efficacy of medium frequency alternating current and TENS on healthy participants.                                                                                                                                                                                                                                                                                             |
| Wattrisse et al., 1993 <sup>179</sup>          | Not standard TENS - Limoges currents                                               | Evaluated effect of transcutaneous cranial electrical stimulation with Limoges currents – French. Excluded based on abstract.                                                                                                                                                                                                                                                              |
| Weng et al., 2005 <sup>180</sup>               | Not standard TENS - 5KHz currents modulated at lower frequencies                   | Evaluated modulated-frequency mode of AL-TENS on tennis elbow pain. "... treated with either 5 KHz modulated by 2 Hz frequency mode (LF group), 5 KHz modulated by 100 Hz frequency mode of TENS (HF group) on acupuncture points (LI10 and LI11)". Output characteristics seems to be a carrier wave of 5KHz modulated at 2Hz or 100Hz.                                                   |
| Whitehair et al., 2019 <sup>181</sup>          | Not TENS                                                                           | Evaluated acute effects of TENS, transcutaneous neuromuscular electrical stimulation and no stimulation on pain-free passive range of motion of the shoulder in subjects with hemiplegic shoulder pain                                                                                                                                                                                     |
| Wieselmann-Penkner et al., 2001 <sup>182</sup> | No pain outcomes                                                                   | Evaluated TENS and EMG-biofeedback on muscular relaxation in bruxism.                                                                                                                                                                                                                                                                                                                      |
| Williams et al., 2019 <sup>183</sup>           | Not TENS Not RCT - healthy humans                                                  | Evaluated conditioned pain modulation efficiency in persons with and without migraine headaches                                                                                                                                                                                                                                                                                            |
| Williams 2019 <sup>184</sup>                   | Not RCT - Abstract                                                                 | Evaluated feasibility of TENS as adjunctive treatment for post-operative orthopaedic pain.                                                                                                                                                                                                                                                                                                 |
| Wilson and Stanczak, 2020 <sup>185</sup>       | Not an RCT - Review                                                                | Round-up of the current body of evidence of using TENS for pain control in patients with advanced cancer and palliative pain.                                                                                                                                                                                                                                                              |
| Wong et al., 2003 <sup>186</sup>               | Not standard TENS - Codetron                                                       | Evaluated acupuncture-like TENS for radiation-induced xerostomia associated with radical radiotherapy using Codetron device that delivers electrical currents randomly between 6 electrodes. Report of phase 1 of the RCT trial. Not an RCT                                                                                                                                                |
| Wong et al., 2012 <sup>187</sup>               | Not standard TENS - Codetron                                                       | Evaluated acupuncture-like TENS for radiation-induced xerostomia associated with radical radiotherapy using Codetron device. "... This particular TENS device ...differs from conventional TENS units, because it embeds a random circuit that enables random switching among 6 electrodes to prevent brain habituation to continuous stimulation" page 4245. Report of phase 2 of the RCT |
| Wu et al., 2012 <sup>188</sup>                 | Not standard TENS - middle frequency electrical stimulation                        | Evaluation of middle frequency electrical stimulation for dysmenorrhea. Currents delivered at frequency of 1000 -10,0000 Hz to acupuncture points not covering pain site (LI4 SP6) using a GM390TE, GEMORE device                                                                                                                                                                          |
| Xu et al., 2014 <sup>189</sup>                 | Cannot isolate TENS because all groups received identical TENS as combined therapy | Evaluated TENS in combination with cobalamin injection for postherpetic neuralgia.                                                                                                                                                                                                                                                                                                         |
| Xie et al., 2017 <sup>190</sup>                | Not standard TENS - transcutaneous electric acupoint stimulation                   | Evaluated transcutaneous electrical acupoint stimulation combined with palonosetron on chemotherapy-induced nausea and vomiting. No pain outcomes.                                                                                                                                                                                                                                         |
| Yang et al., 2017 <sup>191</sup>               | Not an RCT                                                                         | Evaluated acupuncture like TENS on knee osteoarthritis (KOA) with low pain. Single intervention group divided according to low and high pain                                                                                                                                                                                                                                               |

## 10\_OL-TABLE3\_ExcludedStudies

| Reference                              | Reason for exclusion                                                             | Description of study                                                                                                                                                                                                                                                                                                                                                                                                                                                                                                    |
|----------------------------------------|----------------------------------------------------------------------------------|-------------------------------------------------------------------------------------------------------------------------------------------------------------------------------------------------------------------------------------------------------------------------------------------------------------------------------------------------------------------------------------------------------------------------------------------------------------------------------------------------------------------------|
| Yang et al., 2017 <sup>192</sup>       | Not clinical pain - slow-transit constipation                                    | Evaluated transcutaneous electrical stimulation in women with slow-transit constipation. Primary purpose of study was to evaluate slow-transit constipation and associated symptoms of constipation, including abdominal pain as a secondary outcome. Target sample was women with slow-transit constipation rather than patients with clinical pain.                                                                                                                                                                   |
| Yao et al., 2015 <sup>193</sup>        | Not standard TENS - transcutaneous electric acupoint stimulation                 | Evaluated transcutaneous electric acupoint stimulation on quality of recovery and postoperative analgesia after gynaecological laparoscopic surgery to Hegu (LI4), Neiguan (PC6), Zusanli (ST36), and Sanyinjiao (SP6) acupoints distant from pain using a Hans electronic acupuncture apparatus (dense-disperse frequency (2/10 Hz), 6–9mA, HANS-100B, Nanjing Jisheng Medical Technology Company, Nanjing, China).                                                                                                    |
| Yarnitsky et al., 2017) <sup>194</sup> | Not standard TENS - Remote Electrical Neuromodulation                            | Evaluated remote nonpainful electrical upper arm skin stimulation for reducing migraine attack pain. Remote Electrical Neuromodulation uses the principles of conditioned pain modulation applying high intensity TENS to the arm for migraine. Authors argue that REN on arm has neural relationship to migraine pain - we exclude because authors do not call this technique TENS, location of electrodes are remote, and currents delivered using parameters to simulate elicit conditioned pain modulation systems. |
| Yarnitsky et al., 2019) <sup>195</sup> | Not standard TENS and not at site of pain ... much debate in team on this though | Evaluated efficacy and safety of a remote electrical neuromodulation (REN) device for the acute treatment of migraine.                                                                                                                                                                                                                                                                                                                                                                                                  |
| Yeh et al., 2010 <sup>196</sup>        | Not standard TENS - transcutaneous electric acupoint stimulation                 | Evaluated transcutaneous acupoint electrical stimulation for postoperative pain in patients with patient-controlled analgesia. TEAS delivered at acupoints distant from pain, BL40, GB34, HT7, P6                                                                                                                                                                                                                                                                                                                       |
| Yeh et al., 2018 <sup>197</sup>        | Not standard TENS - transcutaneous electric acupoint stimulation                 | Evaluated transcutaneous acupoint electrical stimulation on post-hemorrhoidectomy-associated pain, anxiety, and heart rate variability at acupoints distant from pain, <i>chengshan</i> (BL57) and <i>erbai</i> (EX-UE2) and a stimulator (D0205KL, Ching-Ming Co., Taiwan) delivering dense disperse currents                                                                                                                                                                                                          |
| Yilmaz et al., 2020 <sup>198</sup>     | Not possible to isolate the effects of TENS - "a combination of US, TENS"        | Evaluated high-intensity laser therapy (HILT) and a combination of transcutaneous nerve stimulation (TENS) and ultrasound (US) treatment on pain, range of motion (ROM) and functional activity on cervical pain associated with cervical disc herniation (CDH).                                                                                                                                                                                                                                                        |
| Yip et al., 2007 <sup>199</sup>        | Unable to isolate TENS effects                                                   | Evaluated combined transcutaneous acupoint electrical stimulation and electromagnetic millimetre waves for spinal pain. Not possible to isolate TENS                                                                                                                                                                                                                                                                                                                                                                    |
| Yousef et al., 2015 <sup>200</sup>     | Not standard TENS - posterior tibial nerve stimulation                           | Evaluated transcutaneous electrical posterior tibial nerve stimulation versus lateral internal sphincterotomy for treatment of chronic anal fissure. Transcutaneous electrical nerve stimulation of posterior tibial nerve is used for faecal and urinary incontinence and was applied using an Endomed 182 device (Enraf Nonius, Holland) with the negative contact electrode on the ankle skin behind the medial malleolus, and the positive electrode, 10 cm above the negative electrode.                           |
| Yu et al., 2019 <sup>201</sup>         | Not standard TENS - TEAS                                                         | Evaluated TEAS on early recovery in patients undergoing gynaecological laparoscopic surgery.                                                                                                                                                                                                                                                                                                                                                                                                                            |
| Zeb et al., 2019 <sup>202</sup>        | Not RCT                                                                          | Evaluated effectiveness TENS in management of neuropathic pain in post-traumatic incomplete spinal cord injury patients.                                                                                                                                                                                                                                                                                                                                                                                                |
| Zhan and Tian 2019 <sup>203</sup>      | Not standard TENS - TEAS                                                         | Evaluated effect and adverse effects of transverse abdominis plane block and TEAS on postoperative outcomes.                                                                                                                                                                                                                                                                                                                                                                                                            |
| Zhang et al., 2014 <sup>204</sup>      | Not standard TENS - transcutaneous electric acupoint stimulation                 | Evaluated pre-treatment with transcutaneous electrical acupoint stimulation on the quality of recovery after ambulatory breast surgery. Transcutaneous electrical acupoint stimulation was delivered at acupoints distant from pain LI4, PC4, ST36 (hand and arm) using a TEAS - SDZ-V dense and disperse device.                                                                                                                                                                                                       |
| Zhang et al., 2016 <sup>205</sup>      | Not standard TENS - transcutaneous electric acupoint stimulation                 | Evaluated TEAS before the anaesthesia induction on opioids consumption in patients undergoing off-pump coronary artery bypass grafting at distal-proximal acupoints combination (LI4 and CV17) and regional acupoints combination (CV17 and CV14) using a <i>Hwato</i> electronic acupuncture treatment instrument (model No. SDZ-V, Suzhou Medical Appliances Co., Ltd, Suzhou, China). - - <i>InJ Clin Exp Med</i> 9(12)                                                                                              |
| Zhang et al., 2017 <sup>206</sup>      | TENS delivered to body sites distant to pain                                     | Evaluated TENS of foot for postoperative bladder spasms and pain. Stimulation not on pain site                                                                                                                                                                                                                                                                                                                                                                                                                          |
| Zhang et al., 2020 <sup>207</sup>      | E - Not pain                                                                     | Evaluated effect of transcutaneous electrical stimulation treatment in combination with intraoperative nerve staining on sexual function after radical surgery.                                                                                                                                                                                                                                                                                                                                                         |
| Zhao et al., 2015 <sup>208</sup>       | Not standard TENS - transcutaneous electric acupoint stimulation                 | Evaluated transcutaneous electrical acupoint stimulation for spasticity following Brain Injury using an acupoint nerve electrical stimulator (HANS-100A, Nanjing Gensun medical technology company, Nanjing, China) at Hegu (LI4)–Yuji (LU10) and Zusanli (ST36)–Chengshan (BL57). Pain on Disability Assessment Scale was a secondary outcome.                                                                                                                                                                         |
| Zhou et al., 2018 <sup>209</sup>       | Not standard TENS - transcutaneous electric acupoint stimulation                 | Evaluated Transcutaneous Electrical Acupoint Stimulation for gastrointestinal dysfunction after caesarean section SP6 and ST36 acupoints using a <i>Hwato</i> electric acupuncture treatment instrument (model No. SDZV; Suzhou Medical Appliances Co. Ltd, Suzhou, China) with a dilatational wave of 2/10 Hz (2-second cycle) for 30 min. TEAS delivered at acupoints distant from pain.                                                                                                                              |

10\_OL-TABLE3\_ExcludedStudies

| Reference                         | Reason for exclusion                                    | Description of study                                                                                                                                                                                                                           |
|-----------------------------------|---------------------------------------------------------|------------------------------------------------------------------------------------------------------------------------------------------------------------------------------------------------------------------------------------------------|
| Zizic et al., 1995 <sup>210</sup> | Not standard TENS – microcurrent electrical stimulation | Evaluated pulsed electrical stimulation for osteoarthritis of the knee using low voltage (mean = 6.2V peak volts). Characteristics like those of microcurrent electrical stimulation although no overt statement to this effect in the report. |

## REFERENCES – EXCLUDED STUDIES WITH REASONS\*

\*Note: Reference numbering in this list relates only to studies cited in this table

1. Aguilar Ferrandiz ME, Nijs J, Gidron Y, et al. Auto-Targeted Neurostimulation Is Not Superior to Placebo in Chronic Low Back Pain: A Fourfold Blind Randomized Clinical Trial. *Pain physician* 2016; **19**(5): E707-19.
2. Albayrak I, Apiliogullari S, Dal CN, Levendoglu F, Ozerbil OM. Efficacy of Pulsed Radiofrequency Therapy to Dorsal Root Ganglion Adding to TENS and Exercise for Persistent Pain after Total Knee Arthroplasty. *Journal of Knee Surgery* 2017; **30**(2): 134-42.
3. Alhusaini AA, Fallatah S, Melam GR, Buragadda S. Efficacy of transcutaneous electrical nerve stimulation combined with therapeutic exercise on hand function in children with hemiplegic cerebral palsy. *Somatosensory & motor research* 2019; **36**(1): 49-55.
4. Altas EU, Demirdal U. The effect of physical therapy and rehabilitation modalities on sleep quality in patients with primary knee osteoarthritis: A single-blind, prospective, randomized-controlled study. *Turkish journal of physical medicine and rehabilitation* 2020; **66**(1): 73-83.
5. Al Zamil M, Kulikova N, Bezrukova O, Volkova I, Stahurlova V. Comparative analysis between transcutaneous electroneurostimulation and acupuncture in treatment of carpal tunnel syndrome. *European Journal of Neurology* 2019; **26**: 729.
6. Askin A, Savas S, Koyuncuoglu HR, Baloglu HH, Inci MF. Low dose high frequency ultrasound therapy for stellate ganglion blockade in complex regional pain syndrome type I: a randomised placebo controlled trial. *International Journal of Clinical and Experimental Medicine* 2014; **7**(12): 5603-11.
7. Atalay C, Yilmaz KB. The effect of transcutaneous electrical nerve stimulation on postmastectomy skin flap necrosis. *Breast cancer research and treatment* 2009; **117**(3): 611-4.
8. Augustinsson L, Bohlin P, Bundsen P, et al. Pain relief during delivery by transcutaneous electrical nerve stimulation. *Pain* 1977; **4**(1): 59-65.
9. Avramidis K, Strike PW, Taylor PN, Swain ID. Effectiveness of electric stimulation of the vastus medialis muscle in the rehabilitation of patients after total knee arthroplasty. *Archives of physical medicine and rehabilitation* 2003; **84**(12): 1850-3.
10. Aydın S, Arıoğlu Aydın Ç, Batmaz G, Dansuk R. Effect of vaginal electrical stimulation on female sexual functions: a randomized study. *Journal of sexual medicine* 2015; **12**(2): 463-9.
11. Aydoğan S, Er U, Ozlu O. Effectiveness of preemptive analgesia using a frequency rhythmic electrical modulation system in patients having instrumented fusion for lumbar stenosis. *Asian spine journal* 2014; **8**(2): 190-6.
12. Ayyildiz A, Nuhoglu B, Huri E, Huri M, Gurdal M, Germiyanoglu C. Transcutaneous electrical nerve stimulation (TENS): Decreased of pain when extracorporeal shock wave lithotripsy. [Turkish]. *Turk Uroloji Dergisi* 2004; **30**(4): 446-50.
13. Bai WY, Yang YC, Teng XF, Wan YX, Wei W, Zhu JC. Effects of Transcutaneous Electrical Acupoint Stimulation on the Stress Response During Extubation After General Anesthesia in Elderly Patients Undergoing Elective Supratentorial Craniotomy: a Prospective Randomized Controlled Trial. *Journal of neurosurgical anesthesiology* 2018; **30**(4): 337-46.
14. Behm DG, Colwell EM, Power GMJ, et al. Transcutaneous electrical nerve stimulation improves fatigue performance of the treated and contralateral knee extensors. *European journal of applied physiology* 2019; **119**(11-12): 2745-55.
15. Belmonte R, Tejero M, Ferrer M, et al. Efficacy of low-frequency low-intensity electrotherapy in the treatment of breast cancer-related lymphoedema: a cross-over randomized trial. *Clinical rehabilitation* 2012; **26**(7): 607-18.
16. Bouafif L, Ellouze N. Design and evaluation of a modulated TENS stimulation in medical pain therapy. *Current Signal Transduction Therapy* 2019; **14**(1): 75-83.
17. Bundsen P, Peterson L, Selstam U. Pain relief in labor by transcutaneous electrical nerve stimulation. A prospective matched study. *Acta obstetrica et gynecologica Scandinavica* 1981; **60**(5): 459-68.

## 10\_OL-TABLE3\_ExcludedStudies

- 1 18. Burch FX, Tarro JN, Greenberg JJ, Carroll WJ. Evaluating the benefits of patterned stimulation in the treatment of osteoarthritis of the knee: a multi-center, randomized, single-blind, controlled study with an independent masked evaluator. *Osteoarthritis and cartilage* 2008; **16**(8): 865-72.
- 2 19. Burssens P, Forsyth R, Steyaert A, van Ovost E, Praet M, Verdonk R. Influence of burst TENS stimulation on the healing of Achilles tendon suture in man. *Acta Orthopaedica Belgica* 2003 Dec;69(6):528-532 2003.
- 3 20. Carbonario F, Matsutani L, Yuan S, Marques A. Effectiveness of high-frequency transcutaneous electrical nerve stimulation at tender points as adjuvant therapy for patients with fibromyalgia. *European journal of physical and rehabilitation medicine* 2013; **49**(2): 197-204.
- 4 21. Chao A-S, Chao A, Wang T-H, et al. Pain relief by applying transcutaneous electrical nerve stimulation (TENS) on acupuncture points during the first stage of labor: A randomized double-blind placebo-controlled trial. *Pain* 2007; **127**(3): 214-20.
- 5 22. Chee EK, Walton H. Treatment of trigger points with microamperage transcutaneous electrical nerve stimulation (TENS)--(the Electro-Acuscope 80). *Journal of manipulative and physiological therapeutics* 1986; **9**(2): 131-4.
- 6 23. Cheing GL, Hui-Chan CW. Would the addition of TENS to exercise training produce better physical performance outcomes in people with knee osteoarthritis than either intervention alone? *Clinical rehabilitation* 2004; **18**(5): 487-97.
- 7 24. Chen WL, Hsu WC, Lin YJ, Hsieh LF. Comparison of intra-articular hyaluronic acid injections with transcutaneous electric nerve stimulation for the management of knee osteoarthritis: a randomized controlled trial. *Archives of physical medicine and rehabilitation* 2013; **94**(8): 1482-9.
- 8 25. Chen MY, Pu QQ, Liu SY, Jiang ZY. [Efficacy comparison of different stimulation therapies for peri-arthritis of shoulder]. *Zhongguo zhen jiu = Chinese acupuncture & moxibustion* 2013; **33**(2): 109-12.
- 9 26. Chen YQ, Wu WL, Yao YS, Yang Y, Zhao QY, Qiu LC. Transcutaneous electric acupoint stimulation at Jiaji points reduce abdominal pain after colonoscopy: a randomized controlled trial. *International Journal of Clinical and Experimental Medicine* 2015; **8**(4): 5972-7.
- 10 27. Chen YQ, Yao YS, Wu YH, Dai DS, Zhao QY, Qiu LC. Transcutaneous electric acupoint stimulation alleviates remifentanyl-induced hyperalgesia in patients undergoing thyroidectomy: a randomized controlled trial. *International Journal of Clinical and Experimental Medicine* 2015; **8**(4): 5781-7.
- 11 28. Chen YQ, Yang Y, Yao YS, Dai DS, Qian B, Liu PP. Does transcutaneous electric acupoint stimulation improve the quality of recovery after thyroidectomy? A prospective randomized controlled trial. *International Journal of Clinical and Experimental Medicine* 2015; **8**(8): 13622-7.
- 12 29. Chen J, Zhang Y, Li X, et al. Efficacy of transcutaneous electrical acupoint stimulation combined with general anesthesia for sedation and postoperative analgesia in minimally invasive lung cancer surgery: a randomized, double-blind, placebo-controlled trial. *Thoracic cancer* 2020.
- 13 30. Cheng RSS, Pomeranz B. Electrotherapy of chronic musculoskeletal pain: Comparison of electroacupuncture and acupuncture-like transcutaneous electrical nerve stimulation. *Clinical Journal of Pain* 1986; **2**(3): 143-9.
- 14 31. Chiu JH, Chen WS, Chen CH, et al. Effect of transcutaneous electrical nerve stimulation for pain relief on patients undergoing hemorrhoidectomy: prospective, randomized, controlled trial. *Diseases of the colon and rectum* 1999; **42**(2): 180-5.
- 15 32. Coletta R, Maggiolo F, Di Tizio S. Etofenamate and transcutaneous electrical nerve stimulation treatment of painful spinal syndromes. *International journal of clinical pharmacology research* 1988; **8**(4): 295-8.
- 16 33. Conn IG, Marshall AH, Yadav SN, Daly JC, Jaffer M. Transcutaneous electrical nerve stimulation following appendicectomy: the placebo effect. *Annals of the Royal College of Surgeons of England* 1986; **68**(4): 191-2.
- 17 34. Cornell P, Lopez A, Malofsky H. Pain reduction with transcutaneous electrical nerve stimulation after foot surgery. *J Foot Surg* 1984; **23**(4): 326-33.
- 18 35. Demidas A, Zarzycki M. Touch and Pain Sensations in Diadynamic Current (DD) and Transcutaneous Electrical Nerve Stimulation (TENS): A Randomized Study. *Biomed Research International* 2019; **2019**: 9073073.
- 19 36. Duzyj CM, Simonds A, Jones I, Hill JM, Khan S, Parrott JS. 281: transcutaneous electrical nerve stimulation to reduce pain and opioid use after cesarean: a pilot study. *American journal of obstetrics and gynecology* 2020; **222**(1): S190-.
- 20 37. Dodick DW, Lipton RB, Goadsby PJ, et al. Predictors of Migraine Headache Recurrence: A Pooled Analysis From the Eletriptan Database. *Headache: The Journal of Head & Face Pain* 2008; **48**(2): 184-93.
- 21 38. Eidy M, Fazel MR, Janzamani M, Rezaei MH, Moravveji AR. Preemptive Analgesic Effects of Transcutaneous Electrical Nerve Stimulation (TENS) on Postoperative Pain: A Randomized, Double-Blind, Placebo-Controlled Trial. *Iranian Red Crescent Medical Journal* 2016; **18**(4).



## 10\_OL-TABLE3\_ExcludedStudies

- 1  
2 39. Ertzgaard P, Alwin J, Sorbo A, Lindgren M, Sandsjo L. Evaluation of a self-administered transcutaneous electrical stimulation concept for the treatment of spasticity: a randomized  
3 placebo-controlled trial. *European journal of physical and rehabilitation medicine* 2018; **54**(4): 507-17.
- 4 40. Fagade OO, Obilade TO. Therapeutic effect of TENS on post-IMF trismus and pain. *African journal of medicine and medical sciences* 2003; **32**(4): 391-4.
- 5 41. Fargas-Babjak A, Rooney P, Gerecz E. Randomized trial of Codetron for pain control in osteoarthritis of the hip/knee. *Clinical journal of pain* 1989; **5**(2): 137-41.
- 6 42. Fargas-Babjak AM, Pomeranz B, Rooney PJ. Acupuncture-like stimulation with codetron for rehabilitation of patients with chronic pain syndrome and osteoarthritis. *Acupuncture &*  
7 *electro-therapeutics research* 1992; **17**(2): 95-105.
- 8 43. Fary RE, Carroll GJ, Briffa TG, Briffa NK. The effectiveness of pulsed electrical stimulation in the management of osteoarthritis of the knee: results of a double-blind, randomized,  
9 placebo-controlled, repeated-measures trial. *Arthritis Rheum* 2011; **63**(5): 1333-42.
- 10 44. Fletcher-Smith JC, Walker DM, Allatt K, et al. The ESCAPS study: a feasibility randomized controlled trial of early electrical stimulation to the wrist extensors and flexors to prevent  
11 post-stroke complications of pain and contractures in the paretic arm. *Clinical rehabilitation* 2019; **33**(12): 1919-30.
- 12 45. Gadsby JG, Franks A, Jarvis P, Dewhurst F. Acupuncture-like transcutaneous electrical nerve stimulation within palliative care: a pilot study. *Complementary therapies in medicine*  
13 1997; **5**(1): 13-8.
- 14 46. Gao YQ, Jia Q, Xie S, et al. Clinical Trials for Thyroidectomy Under Acupuncture-aided Anesthesia by Using Electroacupuncture or Transcutaneous Acupoint Electrical Stimulation  
15 of Different Acupoints. *Zhen ci yan jiu = Acupuncture research* 2017; **42**(4): 332-7.
- 16 47. Garaud T, Gervais C, Szekely B, et al. Randomized study of the impact of a therapeutic education program on patients suffering from chronic low-back pain who are treated with  
17 transcutaneous electrical nerve stimulation. *Medicine* 2018; **97**(52): e13782-e.
- 18 48. Garland D, Holt P, Harrington JT, Caldwell J, Zizic T, Cholewczynski J. A 3-month, randomized, double-blind, placebo-controlled study to evaluate the safety and efficacy of a  
19 highly optimized, capacitively coupled, pulsed electrical stimulator in patients with osteoarthritis of the knee. *Osteoarthritis and cartilage* 2007; **15**(6): 630-7.
- 20 49. Gaul C, Diener HC, Silver N, et al. Non-invasive vagus nerve stimulation for PREvention and Acute treatment of chronic cluster headache (PREVA): A randomised controlled study.  
21 *Cephalalgia* 2016; **36**(6): 534-46.
- 22 50. Geirsson G, Wang Y, Lindstrom S, Fall M. Traditional acupuncture and electrical stimulation of the posterior tibial nerve. A trial in chronic interstitial cystitis. *Scand J Urol Nephrol*  
23 1993; **27**(1): 67-70.
- 24 51. Ghoname EA, Craig WF, White PF, et al. Effectiveness of PENS for lower back pain. *Integrative Medicine* 1999; **2**(1): 19-21.
- 25 52. Gokce AH, Gokce FS. Effects of bilateral transcutaneous tibial nerve stimulation on constipation severity in geriatric patients: A prospective clinical study. *Geriatrics & Gerontology*  
26 *International* 2020; **20**(2): 101-5.
- 27 53. Gottfried AC, Adler EP, Fernandez-Becker N, Clarke JO, Habtezion A, Nguyen LAB. Transcutaneous vagal nerve stimulation improves symptoms and gastric emptying in patients  
28 with ideopathic gastroparesis. *Gastroenterology* 2019; **156**(6): S-789-S-90.
- 29 54. Govil M, Mukhopadhyay N, Holwerda T, Sluka K, Rakel B, Schutte DL. Effects of genotype on TENS effectiveness in controlling knee pain in persons with mild to moderate  
30 osteoarthritis. *European Journal of Pain* 2020; **24**(2): 398-412.
- 31 55. Gu S, Lang H, Gan J, Zheng Z, Zhao F, Tu Q. Effect of transcutaneous electrical acupoint stimulation on gastrointestinal function recovery after laparoscopic radical gastrectomy – A  
32 randomized controlled trial. *European journal of integrative medicine* 2019; **26**: 11-7.
- 33 56. Gorodetskiy IG, Gorodnichenko AI, Tursin PS, Reshetnyak VK, Uskov ON. Non-invasive interactive neurostimulation in the post-operative recovery of patients with a trochanteric  
34 fracture of the femur: a randomised, controlled trial. *Journal of Bone & Joint Surgery, British Volume* 2007; **89**(11): 1488-94.
- 35 57. Harrison R, Shore M, Woods T, Mathews G, Gardiner J, Unwin A. A comparative study of transcutaneous electrical nerve stimulation (TENS), entonox, pethidine + promazine and  
36 lumbar epidural for pain relief in labor. *Acta obstetricia et gynecologica Scandinavica* 1987; **66**(1): 9-14.
- 37 58. Hedner N, Milsom I, Eliasson T, Mannheimer C. [TENS is effective in painful menstruation]. *Lakartidningen* 1996; **93**(13): 1219-22.
- 38 59. Herman E, Williams R, Stratford P, Fargas-Babjak A, Trott M. A randomized controlled trial of transcutaneous electrical nerve stimulation (CODETRON) to determine its benefits in  
39 a rehabilitation program for acute occupational low back pain. *Spine* 1994; **19**(5): 561-8.
- 40 60. Hettrick HH, O'Brien K, Laznick H, et al. Effect of transcutaneous electrical nerve stimulation for the management of burn pruritus: a pilot study. *The Journal of burn care &*  
41 *rehabilitation* 2004; **25**(3): 236-40.
- 42 61. Hsieh CYJ, Phillips RB, Adams AH, Pope MH. First prize: Functional outcomes of low back pain: Comparison of four treatment groups in a randomized controlled trial. *Journal of*  
43 *manipulative and physiological therapeutics* 1992; **15**(1): 4-9.
- 44  
45  
46

## 10\_OL-TABLE3\_ExcludedStudies

62. Pope MH, Phillips RB, Haugh LD, Hsieh CY, MacDonald L, Haldeman S. A prospective randomized three-week trial of spinal manipulation, transcutaneous muscle stimulation, massage and corset in the treatment of subacute low back pain. *Spine* 1994; **19**(22): 2571-7.
63. Huang S, Peng W, Tian X, et al. Effects of transcutaneous electrical acupoint stimulation at different frequencies on perioperative anesthetic dosage, recovery, complications, and prognosis in video-assisted thoracic surgical lobectomy: a randomized, double-blinded, placebo-controlled trial. *Journal of anesthesia* 2017; **31**(1): 58-65.
64. Huang W, Yu TY, Long WF, Xiao JB. [Application of Transcutaneous Electrical Acupoint Stimulation Combined with Transversus Abdominis Plane Block to Enhanced Recovery After Surgery in Patients Undergoing Laparoscopic Colorectal Cancer Resection: A Randomized Controlled Clinical Trial]. *Zhen ci yan jiu = Acupuncture research* 2018; **43**(10): 611-5.
65. Huang Y, Bian WW, Hou LL. [Effects of transcutaneous electrical acupoint stimulation on pain of patients in expansion process of skin soft tissue dilator on forehead by water injection]. *Zhonghua shao shang za zhi = Zhonghua shaoshang zazhi = Chinese journal of burns* 2019; **35**(3): 193-7.
66. Ing MR, Hellreich PD, Johnson DW, Chen JJ. Transcutaneous electrical nerve stimulation for chronic post-herpetic neuralgia. *International journal of dermatology* 2015; **54**(4): 476-80.
67. Isсенman J, Nolan M, Rowley J, Hobby R. Transcutaneous electrical nerve stimulation for pain control after spinal fusion with Harrington rods. A clinical report. *Physical therapy* 1985; **65**(10): 1517-20.
68. Itoh K, Hirota S, Katsumi Y, Ochi H, Kitakoji H. A pilot study on using acupuncture and transcutaneous electrical nerve stimulation (TENS) to treat knee osteoarthritis (OA). *Chin Med* 2008; **3**: 2.
69. Itoh K, Itoh S, Katsumi Y, Kitakoji H. A pilot study on using acupuncture and transcutaneous electrical nerve stimulation to treat chronic non-specific low back pain. *Complementary therapies in clinical practice* 2009; **15**(1): 22-5.
70. Jardim P. Transcutaneous electrical nerve stimulation for non-acute low back pain: a randomized double-blind study of conventional, nu-waveform, acupuncture-type and sham therapies. Annual Meeting, American Academy of Orthopaedic Surgeons, 1997; 1997; 1997.
71. Jeans M. Relief of chronic pain by brief, intense transcutaneous electrical stimulation - a double blind study. In: Bonica J, Liebeskind J, Albe-Fessard D, eds. *Advances in Pain Research and Therapy*. New York: Raven Press; 1979: 601-6.
72. Jiang L, Yuan DL, Li M, et al. Combination of flunarizine and transcutaneous supraorbital neurostimulation improves migraine prophylaxis. *Acta Neurologica Scandinavica* 2019; **139**(3): 276-83.
73. Juárez-Albuixech ML, Redondo-González O, Tello I, Collado-Vázquez S, Jiménez-Antona C. Vojta Therapy versus transcutaneous electrical nerve stimulation for lumbosciatica syndrome: A quasi-experimental pilot study. *Journal of Bodywork & Movement Therapies* 2020; **24**(1): 39-46.
74. Jünger M, Arnold A, Zuder D, Stahl HW, Heising S. Local therapy and treatment costs of chronic, venous leg ulcers with electrical stimulation (Dermapulse): a prospective, placebo controlled, double blind trial. *Wound repair and regeneration* 2008; **16**(4): 480-7.
75. Kaplan B, Peled Y, Pardo J, et al. Transcutaneous electrical nerve stimulation (TENS) as a relief for dysmenorrhea. *Clinical and Experimental Obstetrics and Gynecology* 1994; **21**(2): 87-90.
76. Katz J, Melzack R. Auricular transcutaneous electrical nerve stimulation (TENS) reduces phantom limb pain. *Journal of pain and symptom management* 1991; **6**(2): 73-83.
77. Kempf K, Rohling M, Darwish E, et al. High-tone external muscle stimulation for the treatment of chronic sciatica - A randomized controlled crossover trial. *Open Pain Journal* 2018; **11**(1): 21-30.
78. Kho HG, Eijk RJ, Kapteijns WM, van Egmond J. Acupuncture and transcutaneous stimulation analgesia in comparison with moderate-dose fentanyl anaesthesia in major surgery. Clinical efficacy and influence on recovery and morbidity. *Anaesthesia* 1991; **46**(2): 129-35.
79. Kocyigit F, Akalin E, Gezer NS, Orbay O, Kocyigit A, Ada E. Functional magnetic resonance imaging of the effects of low-frequency transcutaneous electrical nerve stimulation on central pain modulation: a double-blind, placebo-controlled trial. *The Clinical journal of pain* 2012; **28**(7): 581-8.
80. Kolen AF, de Nijs RN, Wagemakers FM, Meier AJ, Johnson MI. Effects of spatially targeted transcutaneous electrical nerve stimulation using an electrode array that measures skin resistance on pain and mobility in patients with osteoarthritis in the knee: a randomized controlled trial. *Pain* 2012; **153**(2): 373-81.
81. Kolu E, Buyukavci R, Akturk S, Eren F, Ersoy Y. Comparison of high-intensity laser therapy and combination of transcutaneous nerve stimulation and ultrasound treatment in patients with chronic lumbar radiculopathy: A randomized single-blind study. *Pakistan Journal of Medical Sciences* 2018; **34**(3): 530-4.
82. Koo CC, Lin RS, Wang TG, et al. Novel Noxipoint Therapy versus Conventional Physical Therapy for Chronic Neck and Shoulder Pain: Multicentre Randomised Controlled Trials. *Scientific reports* 2015; **5**: 16342.
83. Kumar D, Marshall HJ. Diabetic peripheral neuropathy: amelioration of pain with transcutaneous electrostimulation. *Diabetes care* 1997; **20**(11): 1702-5.



## 10\_OL-TABLE3\_ExcludedStudies

- 1  
2 84. Kumar D, Alvaro MS, Julka IS, Marshall HJ. Diabetic peripheral neuropathy. Effectiveness of electrotherapy and amitriptyline for symptomatic relief. *Diabetes Care* 1998; **21**(8):  
3 1322-5.
- 4 85. Labrunée M, Boned A, Granger R, et al. Improved Walking Claudication Distance with Transcutaneous Electrical Nerve Stimulation: an Old Treatment with a New Indication in  
5 Patients with Peripheral Artery Disease. *American journal of physical medicine & rehabilitation* 2015; **94**(11): 941-9.
- 6 86. Lan F, Ma YH, Xue JX, Wang TL, Ma DQ. Transcutaneous electrical nerve stimulation on acupoints reduces fentanyl requirement for postoperative pain relief after total hip  
7 arthroplasty in elderly patients. *Minerva anesthesiologica* 2012; **78**(8): 887-95.
- 8 87. Lanham RH, Powell S, Hendrix BE. Efficacy of hypothermia and transcutaneous electrical nerve stimulation in podiatric surgery. *J Foot Surg* 1984; **23**  
9 (2): 152-8.
- 10 88. Lee JC, Lin DT, Hong CZ. The effectiveness of simultaneous thermotherapy with ultrasound and electrotherapy with combined AC and DC current on the immediate pain relief of  
11 myofascial trigger points. *Journal of Musculoskeletal Pain* 1997; **5**(1): 81-90.
- 12 89. Lee B, Hong SH, Kim K, et al. Efficacy of the device combining high-frequency transcutaneous electrical nerve stimulation and thermotherapy for relieving primary dysmenorrhea: a  
13 randomized, single-blind, placebo-controlled trial. *European journal of obstetrics, gynecology, and reproductive biology* 2015; **194**: 58-63.
- 14 90. Lehmann TR, Russell DW, Spratt KF. The impact of patients with nonorganic physical findings on a controlled trial of transcutaneous electrical nerve stimulation and  
15 electroacupuncture. *Spine* 1983; **8**(6): 625-34.
- 16 91. Lehmann TR, Russell DW, Spratt KF, et al. Efficacy of electroacupuncture and TENS in the rehabilitation of chronic low back pain patients. *Pain* 1986; **26**(3): 277-90.
- 17 92. Lerma K, Goldthwaite LM, Blumenthal PD, Shaw KA. Transcutaneous electrical nerve stimulation (TENS) for pain control during first-trimester abortion: A single-blinded  
18 randomized controlled trial. *Contraception* 2020; **101**(5): 357.
- 19 93. Li M, Xu F, Liu M, Li Y, Lin L, Chen J. Promoting effects and autonomic mechanisms of transcutaneous electrical acustimulation on the postoperative recovery after caesarian  
20 section *Gastroenterology* 2019; **156**(6): S-584-S-5.
- 21 94. Lin Y, Yang W, Li Y, et al. Mechanism of acupoint transcutaneous electric stimulation on analgesic anesthesia in the patients undergoing general anesthesia anorectal operation.  
22 *Zhongguo zhen jiu [Chinese acupuncture & moxibustion]* 2017; **37**(7): 747-52.
- 23 95. Liu X, Li S, Wang B, An L, Ren X, Wu H. Intraoperative and postoperative anaesthetic and analgesic effect of multipoint transcutaneous electrical acupuncture stimulation combined  
24 with sufentanil anaesthesia in patients undergoing supratentorial craniotomy. *Acupuncture in medicine : journal of the British Medical Acupuncture Society* 2015; **33**(4): 270-6.
- 25 96. Loeser J, Black R, Christman A. Relief of pain by transcutaneous electrical nerve stimulation. *Journal of neurosurgery* 1975; **42**: 308-14.
- 26 97. Lone AR, Wafai ZA, Buth BA, Wani TA, Koul PA, Khan SH. Analgesic efficacy of transcutaneous electrical nerve stimulation compared with diclofenac sodium in osteo-arthritis of  
27 the knee. *Physiotherapy* 2003; **89**(8): 478-85.
- 28 98. Lorenzana FD. A randomized controlled trial of the efficacy of transcutaneous electrical nerve stimulation (TENS) versus lidocaine in the relief of episiotomy pain. *Philippine journal*  
29 *of obstetrics & gynecology : official publication, Philippine Obstetrical and Gynecological Society* 1999; **23**(4): 135-42.
- 30 99. Lv Y, He H, Xie J, et al. Effects of transcutaneous acupoint electrical stimulation combined with low-dose sufentanil pretreatment on the incidence and severity of etomidate-induced  
31 myoclonus: a randomized controlled trial. *Medicine* 2018; **97**(23): e10969.
- 32 100. Macdonald AJR, Coates TW. The discovery of transcutaneous spinal electroanalgesia and its relief of chronic pain. *Physiotherapy* 1995; **81**(11): 653-61.
- 33 101. Malmir K, Ghotbi N, Mir SM, Moradi B. Comparing effects of cryotherapy and transcutaneous electrical nerve stimulation on signs and symptoms of delayed onset muscle soreness  
34 in amateur athletes. *Open Pain Journal* 2017; **10**: 73-80.
- 35 102. Maria Fernandez-Seguín L, Marcos Heredia-Rizo A, Antonio Diaz-Mancha J, Gonzalez-Garcia P, Ramos-Ortega J, Munuera-Martinez PV. Immediate and short-term radiological  
36 changes after combining static stretching and transcutaneous electrical stimulation in adults with cavus foot A randomized controlled trial. *Medicine* 2019; **98**(46): e18018.
- 37 103. Matsuse H, Segal NA, Rabe KG, Shiba N. The Effect of Neuromuscular Electrical Stimulation During Walking on Muscle Strength and Knee Pain in Obese Women With Knee Pain:  
38 A Randomized Controlled Trial. *American journal of physical medicine & rehabilitation* 2020; **99**(1): 56-64.
- 39 104. McGough JJ, Sturm A, Cowen J, et al. Double-Blind, Sham-Controlled, Pilot Study of Trigeminal Nerve Stimulation for mumm. *Journal of the American Academy of Child and*  
40 *Adolescent Psychiatry* 2019; **58**(4): 403-11.e3.
- 41 105. Meade CS, Lukas SE, McDonald LJ, et al. A randomized trial of transcutaneous electric acupoint stimulation as adjunctive treatment for opioid detoxification. *Journal of substance*  
42 *abuse treatment* 2010; **38**(1): 12-21.

## 10\_OL-TABLE3\_ExcludedStudies

106. Meechan JG, Gowans AJ, Welbury RR. The use of patient-controlled transcutaneous electronic nerve stimulation (TENS) to decrease the discomfort of regional anaesthesia in dentistry: a randomised controlled clinical trial. *Journal of dentistry* 1998; **26**(5-6): 417-20.
107. Melzack R. Prolonged relief of pain by brief, intense transcutaneous somatic stimulation. *Pain* 1975; **1**(4): 357-73.
108. Melzack R, Jeans ME, Stratford JG, Monks RC. Ice massage and transcutaneous electrical stimulation: comparison of treatment for low-back pain. *Pain* 1980; **9**(2): 209-17.
109. Mi Z, Gao J, Chen X, Ge Y, Lu K. [Effects of transcutaneous electrical acupoint stimulation on quality of recovery during early period after laparoscopic cholecystectomy]. *Zhongguo zhen jiu = Chinese acupuncture & moxibustion* 2018; **38**(3): 256-60.
110. Miller Jones CM. Transcutaneous nerve stimulation in labour. *Anaesthesia* 1980; **35**(4): 372-5.
111. Monaco A, Sgolastra F, Pietropaoli D, Giannoni M, Cattaneo R. Comparison between sensory and motor transcutaneous electrical nervous stimulation on electromyographic and kinesigraphic activity of patients with temporomandibular disorder: a controlled clinical trial. *BMC musculoskeletal disorders* 2013; **14**.
112. Mucuk S, Baser M. Effects of noninvasive electroacupuncture on labour pain and duration. *Journal of clinical nursing* 2014; **23**(11-12): 1603-10.
113. Mummolo S Dds P, Nota A Dds P, Tecco S, et al. Ultra-low-frequency transcutaneous electric nerve stimulation (ULF-TENS) in subjects with craniofacial pain: A retrospective study. *Cranio : the journal of craniomandibular practice* 2018; 1-6.
114. Murina F, Bernorio R, Palmiotto R. The use of amielle vaginal trainers as adjuvant in the treatment of vestibulodynia: An observational multicentric study. *MedGenMed Medscape General Medicine* 2008; **10** (1) (no pagination)(23).
115. Murina F, Felice R, Di Francesco S, Oneda S. Vaginal diazepam plus transcutaneous electrical nerve stimulation to treat vestibulodynia: A randomized controlled trial. *European journal of obstetrics, gynecology, and reproductive biology* 2018; **228**: 148-53.
116. Mysliwiec A, Saulicz E, Kuszewski M, Kokosz M, Wolny T. Assessment of the influence of Saunders traction and transcutaneous electrical nerve stimulation on hand grip force in patients with neck pain. *Ortopedia, traumatologia, rehabilitacja* 2011; **13**(1): 37-44.
117. Naeser MA, Hahn KA, Lieberman BE, Branco KF. Carpal tunnel syndrome pain treated with low-level laser and microamperes transcutaneous electric nerve stimulation: a controlled study. *Archives of physical medicine and rehabilitation* 2002; **83**(7): 978-88.
118. Nakano J, Ishii K, Fukushima T, et al. Effects of transcutaneous electrical nerve stimulation on physical symptoms in advanced cancer patients receiving palliative care. *International Journal of Rehabilitation Research* 2020; **43**(1): 62-8.
119. Ngai SPC, Jones AYM, Hui-Chan CWY, Ko FWS, Hui DSC. Effect of 4 weeks of Acu-TENS on functional capacity and beta-endorphin level in subjects with chronic obstructive pulmonary disease: A randomized controlled trial. *Respiratory Physiology & Neurobiology* 2010; **173**(1): 29-36.
120. Noehren B, Dailey DL, Rakel BA, et al. Effect of transcutaneous electrical nerve stimulation on pain, function, and quality of life in fibromyalgia: a double-blind randomized clinical trial. *Physical therapy* 2015; **95**(1): 129-40.
121. Nourbakhsh MR, Fearon FJ. An alternative approach to treating lateral epicondylitis. A randomized, placebo-controlled, double-blinded study. *Clinical rehabilitation* 2008; **22**(7): 601-9.
122. Okonkwo UP, Ibeneme SC, Ihegihu EY, et al. Effects of transcutaneous electrical nerve stimulation in the Management of Post-Injection Sciatic Pain in a non-randomized controlled clinical trial in Nnewi, Nigeria. *BMC complementary and alternative medicine* 2018; **18**.
123. Oyibo SO, Breislin K, Boulton AJM. Electrical stimulation therapy through stocking electrodes for painful diabetic neuropathy: A double blind, controlled crossover study. *Diabetic Medicine* 2004; **21**(8): 940-4.
124. Ozen S, Cosar SNS, Cabioglu MT, Cetin N. A Comparison of Physical Therapy Modalities Versus Acupuncture in the Treatment of Fibromyalgia Syndrome: A Pilot Study. *Journal of Alternative and Complementary Medicine* 2019; **25**(3): 296-304.
125. Park J, Seo D, Choi W, Lee SW. The effects of exercise with TENS on spasticity, balance, and gait in patients with chronic stroke: A randomized controlled trial. *Medical Science Monitor* 2014; **20**: 1890-6.
126. Patel JI, Kumar BNP, Ravish VN. EFFECT OF MCKENZIE METHOD WITH TENS ON LUMBAR RADICULOPATHY - A RANDOMIZED CONTROLLED TRIAL. *International Journal of Physiotherapy* 2016; **3**(1): 94-9.
127. Peng T, Li XT, Zhou SF, Xiong Y, Kang Y, Cheng HD. Transcutaneous Electrical Nerve Stimulation on Acupoints Relieves Labor Pain: A Non-randomized Controlled Study. *Chinese Journal of Integrative Medicine* 2010; **16**(3): 234-8.
128. Polat CS, Dogan A, Ozcan DS, Koseoglu BF, Akselim SK, Onat SS. The Effectiveness of Transcutaneous Electrical Nerve Stimulation in Knee Osteoarthritis with Neuropathic Pain Component: A Randomized Controlled Study. *Turk Osteoporoz Dergisi-Turkish Journal of Osteoporosis* 2017; **23**(2): 47-51.

## 10\_OL-TABLE3\_ExcludedStudies

129. Pope M, Phillips R, Haugh L, Hsieh C, MacDonald L, Haldeman S. A prospective randomized three-week trial of spinal manipulation, transcutaneous muscle stimulation, massage and corset in the treatment of subacute low back pain. *Spine* 1994; **19**(22): 2571-7.
130. Pour NH, Kaviani M, Razeghi M. Comparison of effect of transcutaneous electrical nerve stimulation and acupressure in decreasing labor pain in primiparous women. [Persian]. *Iranian Journal of Obstetrics, Gynecology and Infertility* 2012; **15**(12): 27-33.
131. Quinton DN, Sloan JP, Theakstone J. Transcutaneous electrical nerve stimulation in acute hand infections. *Journal of hand surgery (Edinburgh, Scotland)* 1987; **12**(2): 267-8.
132. Radhakrishna N, Rajagopalan V, Chouhan RS, Singh S, MP P. Effect of Preoperative Transcutaneous Electrical Nerve Stimulation on Intraoperative Anesthetic Drug Consumption and Pain Scores in Patients Undergoing Lumbar Discectomy under General Anesthesia. *Indian J Pain* 2020; **34**: 22-6.
133. Rapoport AM, Bonner JH, Lin T, et al. Remote electrical neuromodulation (REN) in the acute treatment of migraine: a comparison with usual care and acute migraine medications. *Journal of Headache & Pain* 2019; **20**(1): N.PAG.
134. Razavi M, Jansen GB. Effects of acupuncture and placebo TENS in addition to exercise in treatment of rotator cuff tendinitis. *Clinical rehabilitation* 2004; **18**(8): 872-8.
135. Reich BA. Non-invasive treatment of vascular and muscle contraction headache: a comparative longitudinal clinical study. *Headache* 1989; **29**(1): 34-41.
136. Reichstein L, Labrenz S, Ziegler D, Martin S. Effective treatment of symptomatic diabetic polyneuropathy by high-frequency external muscle stimulation. *Diabetologia* 2005; **48**(5): 824-8.
137. Rodriguez-Fernandez AL, Garrido-Santofimia V, Geita-Rodriguez J, Fernandez-De-Las-Peas C. Effects of burst-type transcutaneous electrical nerve stimulation on cervical range of motion and latent myofascial trigger point pain sensitivity. *Archives of physical medicine and rehabilitation* 2011; **92**(9): 1353-8.
138. Rooney SM, Jain S, McCormack P, Bains MS, Martini N, Goldiner PL. A comparison of pulmonary function tests for postthoracotomy pain using cryoanalgesia and transcutaneous nerve stimulation. *Annals of Thoracic Surgery* 1986; **41**(2): 204-7.
139. Roth PM, Thrash WJ. Effect of transcutaneous electrical nerve stimulation for controlling pain associated with orthodontic tooth movement. *American journal of orthodontics and dentofacial orthopedics : official publication of the American Association of Orthodontists, its constituent societies, and the American Board of Orthodontics* 1986; **90**(2): 132-8.
140. Santiesteban AJ, Burnham TL, George KL. Primary spasmodic dysmenorrhea: The use of TENS on acupuncture points. *American Journal of Acupuncture* 1985; **13**(1): 35-42.
141. Sari Z, Aydoğdu O, Demirbüken İ, Yurdalan SU, Polat MG. A Better Way to Decrease Knee Swelling in Patients with Knee Osteoarthritis: a Single-Blind Randomised Controlled Trial. *Pain research & management* 2019; **2019**: 8514808.
142. Schuster GD, Infante MC. Pain relief after low back surgery: the efficacy of transcutaneous electrical nerve stimulation. *Pain* 1980; **8**(3): 299-302.
143. Schoenen J, Jensen RH, Lantéri-Minet M, et al. Stimulation of the sphenopalatine ganglion (SPG) for cluster headache treatment. Pathway CH-1: a randomized, sham-controlled study. *Cephalalgia* 2013; **33**(10): 816-30.
144. Schomburg F, Carter-Baker S. Transcutaneous electrical nerve stimulation for postlaparotomy pain. *Physical therapy* 1983; **63**(2): 188-93.
145. Selfe TK, Bourguignon C, Taylor AG. Effects of noninvasive interactive neurostimulation on symptoms of osteoarthritis of the knee: a randomized, sham-controlled pilot study. *Journal of alternative and complementary medicine (New York, NY)* 2008; **14**(9): 1075-81.
146. Shirazi ZR, Shafae R, Abbasi L. The effects of transcutaneous electrical nerve stimulation on joint position sense in patients with knee joint osteoarthritis. *Physiotherapy theory and practice* 2014; **30**(7): 495-9.
147. Silberstein SD, Mechtler LL, Kudrow DB, et al. Non-Invasive Vagus Nerve Stimulation for the ACute Treatment of Cluster Headache: Findings From the Randomized, Double-Blind, Sham-Controlled ACT1 Study. 2016; **56**(8): 1317-32.
148. Silberstein SD, Calhoun AH, Lipton RB, et al. Chronic migraine headache prevention with noninvasive vagus nerve stimulation: The EVENT study. *Neurology* 2016; **87**(5): 529-38.
149. Simon CB, Riley JL, Fillingim RB, Bishop MD, George SZ. Age Group Comparisons of TENS Response Among Individuals With Chronic Axial Low Back Pain. *Journal of Pain* 2015; **16**(12): 1268-79.
150. Simpson KH, Ward J. A randomized, double-blind, crossover study of the use of transcutaneous spinal electroanalgesia in patients with pain from chronic critical limb ischemia. *Journal of pain and symptom management* 2004; **28**(5): 511-6.
151. Solomon S, Guglielmo KM. Treatment of headache by transcutaneous electrical stimulation. *Headache* 1985; **25**(1): 12-5.
152. Solomon S, Elkind A, Freitag F, et al. Safety and effectiveness of cranial electrotherapy in the treatment of tension headache. *Headache* 1989; **29**(7): 445-50.
153. Sonde L, Kalimo H, Fernaeus SE, Viitanen M. Low TENS treatment on post-stroke paretic arm: a three-year follow-up. *Clinical rehabilitation* 2000; **14**(1): 14-9.
154. Stralka SW, Jackson JA, Lewis AR. Treatment of hand and wrist pain: A randomized clinical trial of high voltage pulsed, direct current built into a wrist splint. *AAOHN Journal* 1998; **46**(5): 233-6.

## 10\_OL-TABLE3\_ExcludedStudies

155. Stratton S, Smith M. Postoperative thoracotomy. Effect of transcutaneous electrical nerve stimulation on forced vital capacity. *Physical therapy* 1980; **60**(1): 45-7.
156. Strayhorn G. Transcutaneous electrical nerve stimulation and postoperative use of narcotic analgesics. *J Natl Med Assoc* 1983; **75**(8): 811-6.
157. Sun K, Xing T, Zhang F, et al. Perioperative Transcutaneous Electrical Acupoint Stimulation for Postoperative Pain Relief Following Laparoscopic Surgery: A Randomized Controlled Trial. *The Clinical journal of pain* 2017; **33**(4): 340-7.
158. Sunshine W, Field TM, Quintino O, et al. Fibromyalgia benefits from massage therapy and transcutaneous electrical stimulation. *Journal of Clinical Rheumatology* 1996; **2**(1): 18-22.
159. Takla MKN, Rezk-Allah SS. Immediate Effects of Simultaneous Application of Transcutaneous Electrical Nerve Stimulation and Ultrasound Phonophoresis on Active Myofascial Trigger Points: A Randomized Controlled Trial. *American journal of physical medicine & rehabilitation* 2018; **97**(5): 332-8.
160. Takla MKN. Low-frequency high-intensity versus medium-frequency low-intensity combined therapy in the management of active myofascial trigger points: A randomized controlled trial. *Physiotherapy research international : the journal for researchers and clinicians in physical therapy* 2018; **23**(4): e1737.
161. Thiese MS, Hughes M, Biggs J. Electrical stimulation for chronic non-specific low back pain in a working-age population: a 12-week double blinded randomized controlled trial. *BMC musculoskeletal disorders* 2013; **14**: 117.
162. Thompson JW, Bower S, Tyrer SP. A double blind randomised controlled clinical trial on the effect of transcutaneous spinal electroanalgesia (TSE) on low back pain. *European journal of pain (London, England)* 2008; **12**(3): 371-7.
163. Tok F, Aydemir K, Peker F, Safaz I, Taskaynatan MA, Ozgul A. The effects of electrical stimulation combined with continuous passive motion versus isometric exercise on symptoms, functional capacity, quality of life and balance in knee osteoarthritis: Randomized clinical trial. *Rheumatology international* 2011; **31**(2): 177-81.
164. Tousignant-Laflamme Y, Laroche C, Beaulieu C, Bouchard AJ, Boucher S, Michaud-Létourneau M. A randomized trial to determine the duration of analgesia following a 15- and a 30-minute application of acupuncture-like TENS on patients with chronic low back pain. *Physiotherapy theory and practice* 2017; **33**(5): 361-9.
165. Tu Q, Gan J, Shi J, Yu H, He S, Zhang J. Effect of transcutaneous electrical acupoint stimulation on postoperative analgesia after ureteroscopic lithotripsy: a randomized controlled trial. *Urolithiasis* 2019; **47**(3): 279-87.
166. Vance CG, Chimenti RL, Dailey DL, et al. Development of a method to maximize the transcutaneous electrical nerve stimulation intensity in women with fibromyalgia. *Journal of pain research* 2018; **11**: 2269-78.
167. VanderArk GD, McGrath KA. Transcutaneous electrical stimulation in treatment of postoperative pain. *American journal of surgery* 1975; **130**(3): 338-40.
168. Vincenti E, Cervellin A, Mega M. Comparative study between patients treated with transcutaneous electric stimulation and controls during labour. *Clin Exp Obstet Gynaecol* 1982; **9**: 95-7.
169. Vinterberg H, Donde R, Andersen RB. Transcutaneous nerve-stimulation for relief of pain in patients with rheumatoid arthritis. *Ugeskrift for laeger* 1978; **140**(20): 1149-50.
170. Wang W, George S, Wilimas J. Transcutaneous electrical nerve stimulation treatment of sickle cell pain crises. *Acta haematologica* 1988; **80**(2): 99-102.
171. Wang B, Tang J, White PF, et al. Effect of the intensity of transcutaneous acupoint electrical stimulation on the postoperative analgesic requirement. *Anesthesia and analgesia* 1997; **85**(2): 406-13.
172. Wang B, Xiong X, Li WJJoCA. Study on Transcutaneous Electrical Nerve Stimulation (TENS) Applied to Acupoints for Relieving Labor Pain. 2007; **16**(1): 7.
173. Wang ZL, Chen LF, Zhu WM. Observation on the transient analgesic effect of abdominal acupuncture TENS on pain of neck, shoulder, loin and legs. [Chinese]. *Zhongguo zhen jiu = Chinese acupuncture & moxibustion* 2007; **27**(9): 657-9.
174. Wang K, Svensson P, Arendt-Nielsen L. Effect of acupuncture-like electrical stimulation on chronic tension-type headache: a randomized, double-blinded, placebo-controlled trial. *Clinical Journal of Pain* 2007; **23**(4): 316-22.
175. Wang JL, Ren QS, Shen CC, Xie WX, Zheng RX, Ni JW. [Effect of transcutaneous acupoint electrical stimulation on blood bioactive compounds involving cerebral injury during craniotomy]. *Zhen ci yan jiu = Acupuncture research* 2008; **33**(1): 26-30.
176. Wang ZX. Clinical observation on electroacupuncture at acupoints for treatment of senile radical sciatica. [Chinese]. *Zhongguo zhen jiu = Chinese acupuncture & moxibustion* 2009; **29**(2): 126-8.
177. Wang H, Xie Y, Zhang Q, et al. Transcutaneous electric acupoint stimulation reduces intra-operative remifentanyl consumption and alleviates postoperative side-effects in patients undergoing sinusotomy: a prospective, randomized, placebo-controlled trial. *British journal of anaesthesia* 2014; **112**(6): 1075-82.
178. Ward AR, Lucas-Toumbourou S, McCarthy B. A comparison of the analgesic efficacy of medium-frequency alternating current and TENS. *Physiotherapy* 2009; **95**(4): 280-8.
179. Wattrisse G, Leroy B, Dufosse F, Bui Huu Tai R. Transcutaneous electric stimulation of the brain: a comparative study of the effects of its combination with peridural anesthesia using bupivacaine-fentanyl during obstetrical analgesia. *Cahiers d'anesthesiologie* 1993; **41**(5): 489-95.



10\_OL-TABLE3\_ExcludedStudies

180. Weng CS, Shu SH, Chen CC, Tsai YS, Hu WC, Chang YH. The evaluation of two modulated frequency modes of acupuncture-like tens on the treatment of tennis elbow pain. *Biomedical Engineering - Applications, Basis and Communications* 2005; **17**(5): 236-42.
181. Whitehair VC, Chae J, Hisel T, Wilson RD. The effect of electrical stimulation on impairment of the painful post-stroke shoulder. *Topics in Stroke Rehabilitation* 2019; **26**(7): 544-7.
182. Wieselmann-Penkner K, Janda M, Lorenzoni M, Polansky R. A comparison of the muscular relaxation effect of TENS and EMG-biofeedback in patients with bruxism. *Journal of oral rehabilitation* 2001; **28**(9): 849-53.
183. Williams AE, Miller MM, Bartley EJ, McCabe KM, Kerr KL, Rhudy JL. Impairment of Inhibition of Trigeminal Nociception via Conditioned Pain Modulation in Persons with Migraine Headaches. *Pain Medicine* 2019; **20**(8): 1600-10.
184. Williams KM. Is TENS a Feasible Non-Pharmacologic Adjunctive Treatment for Post-operative Orthopedic Pain? *Pain Management Nursing* 2020; **21**(2): 219.
185. Wilson CM, Stanczak JF. Palliative Pain Management Using Transcutaneous Electrical Nerve Stimulation (TENS). *Rehabilitation Oncology* 2020; **38**(1): E1-E6.
186. Wong RKW, Jones GW, Sagar SM, Babjak AF, Whelan T. A phase I-II study in the use of acupuncture-like transcutaneous nerve stimulation in the treatment of radiation-induced xerostomia in head-and-neck cancer patients treated with radical radiotherapy. *International Journal of Radiation Oncology Biology Physics* 2003; **57**(2): 472-80.
187. Wong RK, James JL, Sagar S, et al. Phase 2 results from Radiation Therapy Oncology Group Study 0537: a phase 2/3 study comparing acupuncture-like transcutaneous electrical nerve stimulation versus pilocarpine in treating early radiation-induced xerostomia. *Cancer* 2012; **118**(17): 4244-52.
188. Wu LL, Su CH, Liu CF. Effects of noninvasive electroacupuncture at Hegu (LI4) and Sanyinjiao (SP6) acupoints on dysmenorrhea: a randomized controlled trial. *Journal of alternative and complementary medicine (New York, NY)* 2012; **18**(2): 137-42.
189. Xu G, Feng Y, Tang WZ, Lv ZW. Transcutaneous electrical nerve stimulation in combination with cobalamin injection for postherpetic neuralgia: a single-center randomized controlled trial. *American journal of physical medicine & rehabilitation / Association of Academic Physiatrists* 2014; **93**(4): 287-98.
190. Xie J, Chen LH, Ning ZY, et al. Effect of transcutaneous electrical acupoint stimulation combined with palonosetron on chemotherapy-induced nausea and vomiting: a single-blind, randomized, controlled trial. *Chinese journal of cancer* 2017; **36**(1): 6.
191. Yang G, Su YX, Guo YX. Acupuncture like transcutaneous electrical nerve stimulation (Tens) on knee osteoarthritis (KOA) with low pain: a pilot study. *International Journal of Clinical and Experimental Medicine* 2017; **10**(1): 1059-65.
192. Yang Y, Yim J, Choi W, Lee S. Improving slow-transit constipation with transcutaneous electrical stimulation in women: A randomized, comparative study. *Women & health* 2017; **57**(4): 494-507.
193. Yao Y, Zhao Q, Gong C, et al. Transcutaneous Electrical Acupoint Stimulation Improves the Postoperative Quality of Recovery and Analgesia after Gynecological Laparoscopic Surgery: A Randomized Controlled Trial. *Evid Based Complement Alternat Med* 2015; **2015**: 324360.
194. Yarnitsky D, Volokh L, Ironi A, et al. Nonpainful remote electrical stimulation alleviates episodic migraine pain. *Neurology* 2017; **88**(13): 1250-5.
195. Yarnitsky D, Dodick DW, Grosberg BM, et al. Remote Electrical Neuromodulation (REN) Relieves Acute Migraine: a Randomized, Double-Blind, Placebo-Controlled, Multicenter Trial. *Headache* 2019.
196. Yeh ML, Chung YC, Chen KM, Tsou MY, Chen HH. Acupoint electrical stimulation reduces acute postoperative pain in surgical patients with patient-controlled analgesia: a randomized controlled study. *Alternative therapies in health and medicine* 2010; **16**(6): 10-8.
197. Yeh M-L, Chung Y-C, Hsu L-C, Hung S-H. Effect of transcutaneous acupoint electrical stimulation on post-hemorrhoidectomy-associated pain, anxiety, and heart rate variability: A randomized-controlled study. *Clinical Nursing Research* 2018; **27**(4): 450-66.
198. Yilmaz M, Tarakci D, Tarakci E. Comparison of high-intensity laser therapy and combination of ultrasound treatment and transcutaneous nerve stimulation on cervical pain associated with cervical disc herniation: A randomized trial. *Complementary therapies in medicine* 2020; **49**: 102295.
199. Yip YB, Sonny Tse HM, Wu KK. An experimental study comparing the effects of combined transcutaneous acupoint electrical stimulation and electromagnetic millimeter waves for spinal pain in Hong Kong. *Complementary therapies in clinical practice* 2007; **13**(1): 4-14.
200. Youssef T, Youssef M, Thabet W, et al. Randomized clinical trial of transcutaneous electrical posterior tibial nerve stimulation versus lateral internal sphincterotomy for treatment of chronic anal fissure. *International journal of surgery (London, England)* 2015; **22**: 143-8.
201. Yu X, Zhang F, Chen B. The effect of TEAS on the quality of early recovery in patients undergoing gynecological laparoscopic surgery: a prospective, randomized, placebo-controlled trial. *Trials* 2020; **21**(1).
202. Zeb A, Arsh A, Bahadur S, Ilyas SM. Effectiveness of transcutaneous electrical nerve stimulation in management of neuropathic pain in patients with post traumatic incomplete spinal cord injuries. *Pakistan journal of medical sciences* 2018; **34**(5): 1177-80.

## 10\_OL-TABLE3\_ExcludedStudies

- 1  
2 203. Zhan W, Tian W. Addition of transcutaneous electric acupoint stimulation to transverse abdominis plane block for postoperative analgesia in abdominal surgery: A randomized  
3 controlled trial. *European Journal of Integrative Medicine* 2020; **35**.
- 4 204. Zhang Q, Gao Z, Wang H, et al. The effect of pre-treatment with transcutaneous electrical acupoint stimulation on the quality of recovery after ambulatory breast surgery: a  
5 prospective, randomised controlled trial. *Anaesthesia* 2014; **69**(8): 832-9.
- 6 205. Zhang H, Lei C, Zhang TY, et al. Randomized controlled trial of TEAS with different acupoints combination on opioids consumption in patients undergoing off-pump coronary artery  
7 bypass grafting. *International Journal of Clinical and Experimental Medicine* 2016; **9**(12): 23060-71.
- 8 206. Zhang C, Xiao Z, Zhang X, et al. Transcutaneous electrical stimulation of somatic afferent nerves in the foot relieved symptoms related to postoperative bladder spasms. *BMC urology*  
9 2017; **17**(1): 58.
- 10 207. Zhang XY, Fu Y, Zhang XD, Ding JX, Hua KQ. The effect of transcutaneous electrical stimulation treatment in combination with intraoperative nerve staining on sexual function  
11 after radical hysterectomy: a pilot study. *European journal of gynaecological oncology* 2020; **41**(2): 188-91.
- 12 208. Zhao WL, Wang C, Li ZZ, et al. Efficacy and Safety of Transcutaneous Electrical Acupoint Stimulation to Treat Muscle Spasticity following Brain Injury: A Double-Blinded,  
13 Multicenter, Randomized Controlled Trial. *PloS one* 2015; **10**(2).
- 14 209. Zhou D, Hu B, He S, et al. Transcutaneous electrical acupoint stimulation accelerates the recovery of gastrointestinal function after cesarean section: A randomized controlled trial.  
15 *Evidence-Based Complementary and Alternative Medicine* 2018; **2018**: 7341920.
- 16 210. Zizic TM, Hoffman KC, Holt PA, et al. The treatment of osteoarthritis of the knee with pulsed electrical stimulation. *The Journal of rheumatology* 1995; **22**(9): 1757-61.
- 17  
18  
19  
20  
21  
22  
23  
24  
25  
26  
27  
28  
29  
30  
31  
32  
33  
34  
35  
36  
37  
38  
39  
40  
41  
42  
43  
44  
45  
46





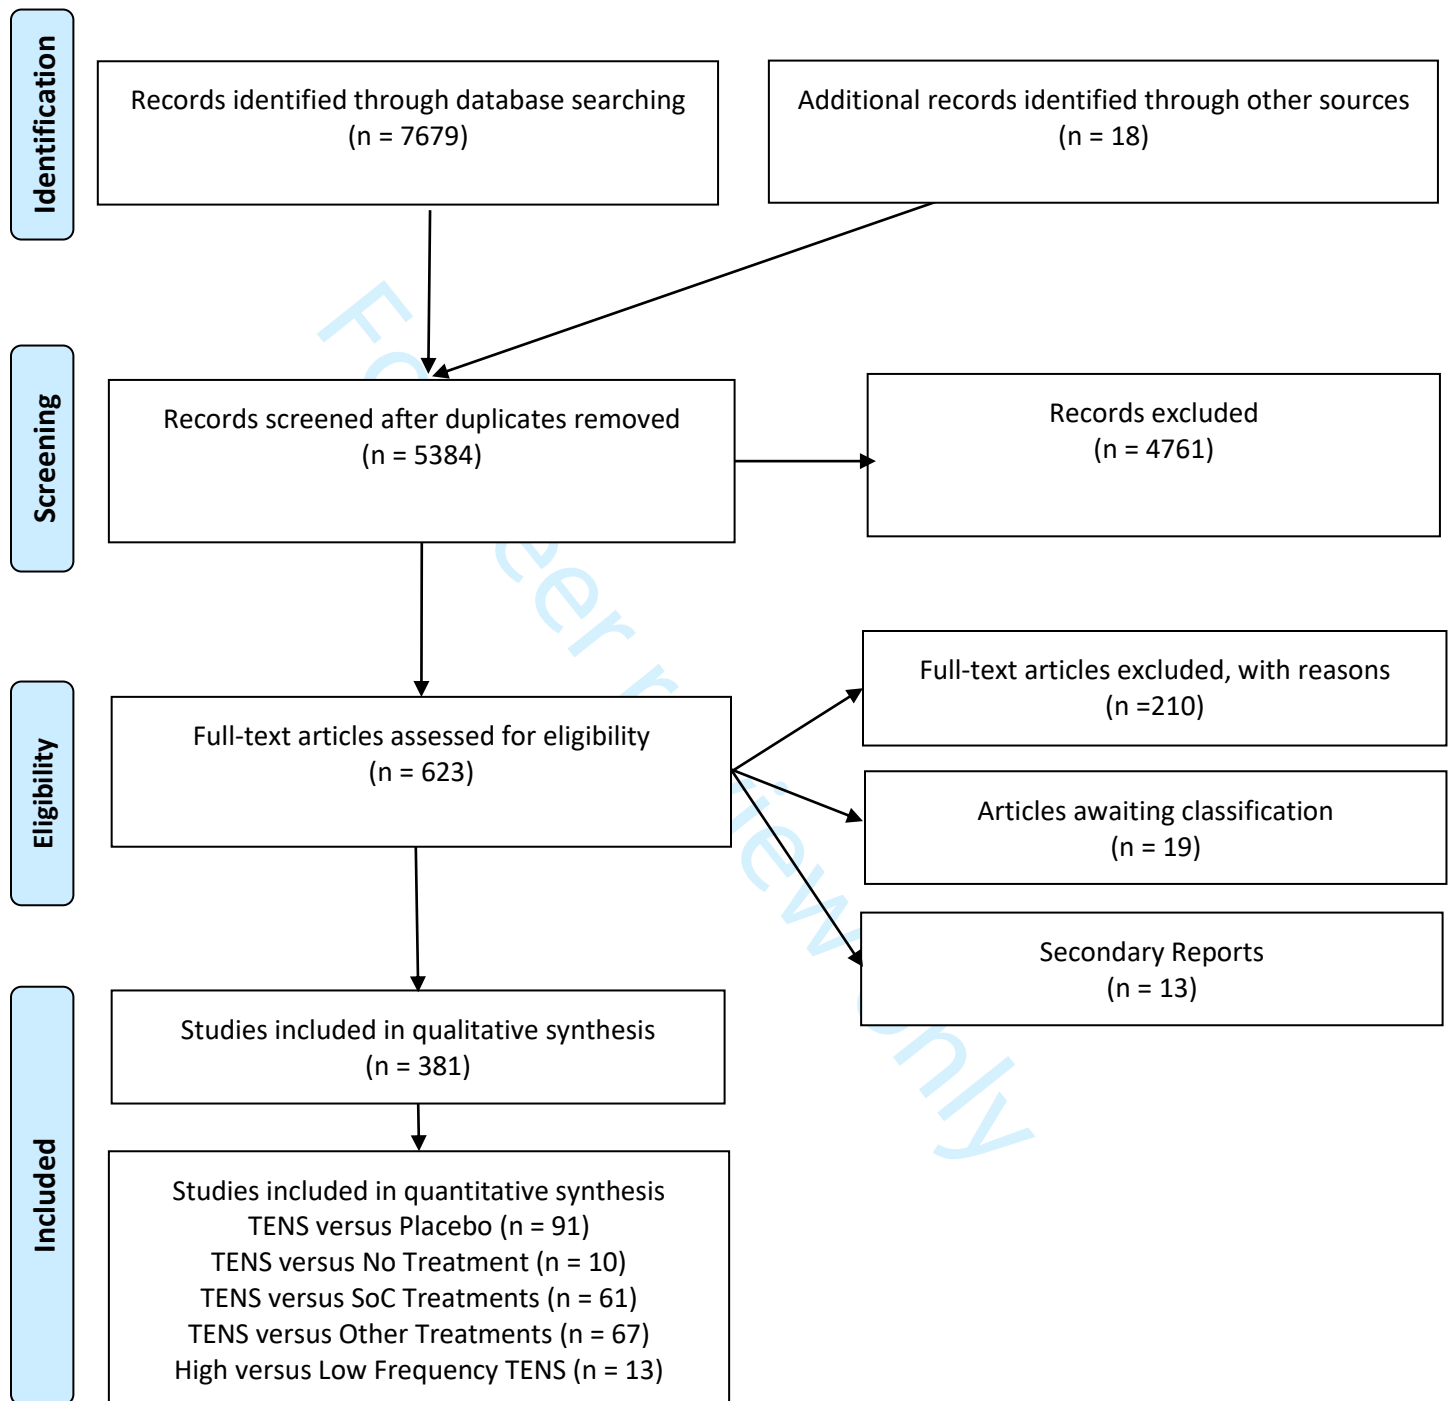



## Adverse Events

ONLINE TABLE 4

| Reference                      | Reference number | Extracted Text                                                                                                                                                                                                 | AEs related to TENS               | Statement   | Extractable Data | Comment                                                                               |
|--------------------------------|------------------|----------------------------------------------------------------------------------------------------------------------------------------------------------------------------------------------------------------|-----------------------------------|-------------|------------------|---------------------------------------------------------------------------------------|
| (Abbasi et al., 2019)          | <sup>1</sup>     | No statements present                                                                                                                                                                                          | No information to extract         | N           | N                |                                                                                       |
| (Abelson et al., 1983)         | <sup>2</sup>     | The only side effect was a slight skin irritation at the site of electrode placement in some of the patients in the transcutaneous electrical nerve stimulation treated group                                  | Skin irritation due to electrodes | Y           | N                | No numerical data to extract                                                          |
| (Abreu et al., 2010)           | <sup>3</sup>     | No statements present                                                                                                                                                                                          | No information to extract         | N           | N                |                                                                                       |
| (Acedo et al., 2015)           | <sup>4</sup>     | No statements present                                                                                                                                                                                          | No information to extract         | N           | N                |                                                                                       |
| (Adedoyin et al., 2005)        | <sup>5</sup>     | No statements present                                                                                                                                                                                          | No information to extract         | N           | N                |                                                                                       |
| (Ahmed, 2010)                  | <sup>6</sup>     | Due to the absence of complications and adverse effects of TENS compared to conventional opioids and non-opioid analgesics, we suggest that TENS is a safe and reliable therapeutic procedure. – in Discussion | No information to extract         | Y – 0 tally | N – 0 tally      | Unclear whether the statement on AEs was generic or in relation to the study findings |
| (Ahmed et al., 2020)           | <sup>7</sup>     | No statements present                                                                                                                                                                                          | No information to extract         | N           | N                |                                                                                       |
| (Alcidi et al., 2007)          | <sup>8</sup>     | No statements present                                                                                                                                                                                          | No information to extract         | N           | N                |                                                                                       |
| (Ali et al., 1981)             | <sup>9</sup>     | No statements present                                                                                                                                                                                          | No information to extract         | N           | N                |                                                                                       |
| (Alizade and Ahmadizad, 2009)  | <sup>10</sup>    | No statements present                                                                                                                                                                                          | No information to extract         | N           | N                | Only mentions potential irritation of skin in introductory section                    |
| (Allais et al., 2003)          | <sup>11</sup>    | No serious side effects occurred in any group during the study.                                                                                                                                                | Reported no adverse events        | Y – 0 tally | N – 0 tally      |                                                                                       |
| (Alm et al., 1979)             | <sup>12</sup>    | In our group of 75 patients we found no significant skin reactions                                                                                                                                             | No information to extract         | N           | N                | Only relates to skin reaction, not other AEs                                          |
| (Al-Smadi et al., 2003)        | <sup>13</sup>    | No statements present                                                                                                                                                                                          | No information to extract         | N           | N                |                                                                                       |
| (Altay et al., 2010)           | <sup>14</sup>    | No statements present                                                                                                                                                                                          | No information to extract         | N           | N                |                                                                                       |
| (Alvarez-Arenal et al., 2002)  | <sup>15</sup>    | No statements present                                                                                                                                                                                          | No information to extract         | N           | N                |                                                                                       |
| (Alves Silverio et al., 2015)  | <sup>16</sup>    | No statements present                                                                                                                                                                                          | No information to extract         | N           | N                |                                                                                       |
| (Amer-Cuenca et al., 2011)     | <sup>17</sup>    | No subject reported adverse events such as skin allergy, pain or burning at the electrode site in either active TENS or placebo TENS groups.                                                                   | Reported no adverse events        | Y – 0 tally | N – 0 tally      |                                                                                       |
| (AminiSaman et al., 2020)      | <sup>18</sup>    | No statements present                                                                                                                                                                                          | No information to extract         | N           | N                |                                                                                       |
| (Angulo and Colwell Jr, 1990)  | <sup>19</sup>    | No statement present                                                                                                                                                                                           | No information to extract         | N           | N                |                                                                                       |
| (Ardic et al., 2002)           | <sup>20</sup>    | No statements present                                                                                                                                                                                          | No information to extract         | N           | N                |                                                                                       |
| (Arvidsson and Eriksson, 1986) | <sup>21</sup>    | No statements present                                                                                                                                                                                          | No information to extract         | N           | N                | Conclusion states that TENS lacks side-effects.                                       |
| (Asgari et al., 2018)          | <sup>22</sup>    | Student's <i>t</i> -test and chi-square were applied to compare baseline characteristics and side effects among groups.                                                                                        | No information to extract         | N           | N                | No mention of adverse events in results or discussion despite                         |

| Reference                  | Reference number | Extracted Text                                                                                                                                                                                                                       | AEs related to TENS                                      | Statement   | Extractable Data | Comment                                                                                                                                                        |
|----------------------------|------------------|--------------------------------------------------------------------------------------------------------------------------------------------------------------------------------------------------------------------------------------|----------------------------------------------------------|-------------|------------------|----------------------------------------------------------------------------------------------------------------------------------------------------------------|
| (Atamaz et al., 2012)      | <sup>23</sup>    | No statements present                                                                                                                                                                                                                | No information to extract                                | N           | N                | the method describing how these would be analysed<br>Flow chart in Fig 1 shows that 6 participants in TENS groups dropped out because of worsening symptoms    |
| (Aydin et al., 2005)       | <sup>24</sup>    | No complications occurred as a result of the treatments given.                                                                                                                                                                       | Reported no adverse events                               | Y – 0 tally | N – 0 tally      |                                                                                                                                                                |
| (Azatcam et al., 2017)     | <sup>25</sup>    | No statements present                                                                                                                                                                                                                | No information to extract                                | N           | N                |                                                                                                                                                                |
| (Báez-Suárez et al., 2018) | <sup>26</sup>    | No patients in any group reported adverse events such as skin allergy or burning at the electrode site.                                                                                                                              | Reported no adverse events on mothers or new-born babies | Y – 0 tally | N – 0 tally      |                                                                                                                                                                |
| (Bai et al., 2017)         | <sup>27</sup>    | The results of the present study demonstrate that TENS can reduce the intensity of the pain associated with PD without any AEs.                                                                                                      | Reported no adverse events                               | Y – 0 tally | N – 0 tally      |                                                                                                                                                                |
| (Baki et al., 2015)        | <sup>28</sup>    | In our study, TENS has beneficial effects for pain relief after thoracotomy without any side effects; ...                                                                                                                            | Reported no adverse events                               | Y – 0 tally | N – 0 tally      |                                                                                                                                                                |
| (Ballegaard et al., 1985)  | <sup>29</sup>    | No statements present                                                                                                                                                                                                                | No information to extract                                | N           | N                |                                                                                                                                                                |
| (Barbarisi et al., 2010)   | <sup>30</sup>    | No statements present                                                                                                                                                                                                                | No information to extract                                | N           | N                | In the final visit (visit IX), all the groups underwent a clinical-neurologic examination and routine blood tests to evaluate the possibility of side effects. |
| (Barker et al., 2006)      | <sup>31</sup>    | We can recommend this technique because of its simple use and the lack of side-effects in our study population.                                                                                                                      | Reported no adverse events                               | Y – 0 tally | N – 0 tally      |                                                                                                                                                                |
| (Barker et al., 2008)      | <sup>32</sup>    | No statements present                                                                                                                                                                                                                | No information to extract                                | N           | N                | Authors state that patients were asked to report adverse events but these were not recorded in results.                                                        |
| (Başkurt et al., 2006)     | <sup>33</sup>    | No statements present                                                                                                                                                                                                                | No information to extract                                | N           | N                |                                                                                                                                                                |
| (Bayindir et al., 1991)    | <sup>34</sup>    | No statements present<br>Low cost, lack of undesirable side effects, and ease of application can make TENS an acceptable method of reducing postoperative chest pain.....                                                            | No information to extract                                | N           | N                | No specific mention of monitoring adverse events in methods or results                                                                                         |
| (Beckwée et al., 2018)     | <sup>35</sup>    | No statements present<br>.... TENS could be experienced as painful instead of pain relieving, and thus, TENS could have an adverse effect on pain in a subgroup of patients.                                                         | No information to extract                                | N           | N                | Authors comments refer to patients with central sensitisation                                                                                                  |
| (Benedetti et al., 1997)   | <sup>36</sup>    | No statements present.<br>We emphasize that the absence of complications and side effects of TENS compared with conventional opioid and nonopioid analgesics makes electrical stimulation a safe and reliable therapeutic procedure. | No information to extract                                | N           | N                |                                                                                                                                                                |

| Reference                      | Reference number | Extracted Text                                                                                                                                                                                                                                                                                                                                                                            | AEs related to TENS                                                                                                 | Statement   | Extractable Data | Comment                                                                                                                     |
|--------------------------------|------------------|-------------------------------------------------------------------------------------------------------------------------------------------------------------------------------------------------------------------------------------------------------------------------------------------------------------------------------------------------------------------------------------------|---------------------------------------------------------------------------------------------------------------------|-------------|------------------|-----------------------------------------------------------------------------------------------------------------------------|
| (Bennett et al., 2010)         | <sup>37</sup>    | Overall, 9 patients experienced adverse events and median number of adverse events per patient was 2 (range 1, 6). Distribution of adverse events was similar following active or placebo TENS applications (describe in Table 4 of their report)                                                                                                                                         | One adverse event directly related to placebo TENS treatment. Two participants withdrew because of increasing pain. | Y           | Y                | Authors do not describe nature of adverse events reported in table 4.<br><br>Data:<br>TENS = 3 events<br>Placebo = 2 events |
| (Bergeron-Vezina et al., 2018) | <sup>38</sup>    | No harms or unintended effects were reported by the participants.                                                                                                                                                                                                                                                                                                                         | Reported no adverse events                                                                                          | Y – 0 tally | N – 0 tally      |                                                                                                                             |
| (Bertalanffy et al., 2005)     | <sup>39</sup>    | No statements present<br>Due to its simplicity and lack of side effects, this method should be considered in these patients.                                                                                                                                                                                                                                                              | No information to extract                                                                                           | N           | N                |                                                                                                                             |
| (Bi et al., 2015)              | <sup>40</sup>    | No statements present                                                                                                                                                                                                                                                                                                                                                                     | No information to extract                                                                                           | N           | N                |                                                                                                                             |
| (Bilgili et al., 2016)         | <sup>41</sup>    | No statements present                                                                                                                                                                                                                                                                                                                                                                     | No information to extract                                                                                           | N           | N                |                                                                                                                             |
| (Binder et al., 2011)          | <sup>42</sup>    | No statements present                                                                                                                                                                                                                                                                                                                                                                     | No information to extract                                                                                           | N           | N                |                                                                                                                             |
| (Bjersa and Andersson, 2014)   | <sup>43</sup>    | No statements present                                                                                                                                                                                                                                                                                                                                                                     | No information to extract                                                                                           | N           | N                |                                                                                                                             |
| (Bjersa et al., 2015)          | <sup>44</sup>    | No statements present                                                                                                                                                                                                                                                                                                                                                                     | No information to extract                                                                                           | N           | N                |                                                                                                                             |
| (Bloodworth et al., 2004)      | <sup>45</sup>    | No statements present                                                                                                                                                                                                                                                                                                                                                                     | No information to extract                                                                                           | N           | N                |                                                                                                                             |
| (Bolat et al., 2019)           | <sup>46</sup>    | “... prevention of unpleasant feelings or complications. A reddish coloration and burning or itching at the electrode–skin junction can occur due to increased blood circulation. However, we observed none of these side effects in the present study”.                                                                                                                                  | Reported no adverse events                                                                                          | Y - 0 tally | N                |                                                                                                                             |
| (Bono et al., 2015)            | <sup>47</sup>    | Neither adverse events nor side effects occurred in the real or sham group.                                                                                                                                                                                                                                                                                                               | Reported no adverse events                                                                                          | Y – 0 tally | N – 0 tally      |                                                                                                                             |
| (Borjesson et al., 1997)       | <sup>48</sup>    | No adverse effects were seen.....                                                                                                                                                                                                                                                                                                                                                         | Reported no adverse events                                                                                          | Y = 0 tally | N = 0 tally      |                                                                                                                             |
| (Borjesson et al., 1998)       | <sup>49</sup>    | No statements present                                                                                                                                                                                                                                                                                                                                                                     | No information to extract                                                                                           | N           | N                |                                                                                                                             |
| (Borup et al., 2009)           | <sup>50</sup>    | No signs of serious or prolonged side effects were found, neither by using acupuncture nor TENS.                                                                                                                                                                                                                                                                                          | 84% of TENS group stated it had no side-effects.                                                                    | Y = 0 tally | N = 0 tally      | No information included on any participants who did experience side-effects.                                                |
| (Breit and Van der Wall, 2004) | <sup>51</sup>    | No statements present                                                                                                                                                                                                                                                                                                                                                                     | No information to extract                                                                                           | N           | N                |                                                                                                                             |
| (Buchmuller et al., 2012)      | <sup>52</sup>    | Twelve patients presented a serious adverse event during the study: five in the active TENS group and seven in the sham TENS group. None of these events was considered to be attributable to the treatment studied. Skin irritation was observed in 11 patients in the active TENS group (leading to study discontinuation in one patient) and in three patients in the sham TENS group. | No details about adverse events included in report (except for skin irritation)                                     | Y           | Y                | Data:<br>TENS = 11 events<br>Placebo = 3 events                                                                             |
| (Bulut et al., 2011)           | <sup>53</sup>    | When side effects were compared, there was no difference between the groups, except skin irritation only in one patient in Group A (p> 0.05).                                                                                                                                                                                                                                             | One patient with skin irritation.                                                                                   | Y           | N                | No numerical data – implies all groups were zero except for                                                                 |



| Reference                                                                                | Reference number                                                            | Extracted Text                                                                                                                                                                                                                                                                                                                                                                                                                                                                                                                                                                                                                                                                            | AEs related to TENS                      | Statement   | Extractable Data | Comment                                                       |
|------------------------------------------------------------------------------------------|-----------------------------------------------------------------------------|-------------------------------------------------------------------------------------------------------------------------------------------------------------------------------------------------------------------------------------------------------------------------------------------------------------------------------------------------------------------------------------------------------------------------------------------------------------------------------------------------------------------------------------------------------------------------------------------------------------------------------------------------------------------------------------------|------------------------------------------|-------------|------------------|---------------------------------------------------------------|
|                                                                                          |                                                                             |                                                                                                                                                                                                                                                                                                                                                                                                                                                                                                                                                                                                                                                                                           |                                          |             |                  | Group A but cannot be certain so not extracting               |
| (Bundsen et al., 1982)                                                                   | <sup>54</sup>                                                               | It can thus be concluded that no adverse effect of TNS is demonstrable by clinical, laboratory or neurological examination of the infants after pain relief by TNS                                                                                                                                                                                                                                                                                                                                                                                                                                                                                                                        | Reported no adverse events               | Y = 0 tally | N = 0 TENS ONLY  |                                                               |
| (Can et al., 2003)                                                                       | <sup>55</sup>                                                               | No statements present                                                                                                                                                                                                                                                                                                                                                                                                                                                                                                                                                                                                                                                                     | No information to extract                | N           | N                |                                                               |
| (Casale et al., 2013)                                                                    | <sup>56</sup>                                                               | No statements present                                                                                                                                                                                                                                                                                                                                                                                                                                                                                                                                                                                                                                                                     | No information to extract                | N           | N                |                                                               |
| (Çebi, 2019)                                                                             | <sup>57</sup>                                                               | No statements present                                                                                                                                                                                                                                                                                                                                                                                                                                                                                                                                                                                                                                                                     | No information to extract                | N           | N                |                                                               |
| (Celik et al., 2013)                                                                     | <sup>58</sup>                                                               | No side effects of low frequency TENS were seen                                                                                                                                                                                                                                                                                                                                                                                                                                                                                                                                                                                                                                           | Reported no adverse events               | Y           | Y                | No numerical data                                             |
| (Cetin et al., 2008)                                                                     | <sup>59</sup>                                                               | No statements present                                                                                                                                                                                                                                                                                                                                                                                                                                                                                                                                                                                                                                                                     | No information to extract                | N           | N                |                                                               |
| (Chandra et al., 2010)                                                                   | <sup>60</sup>                                                               | The incidence of side effects was negligible in both the groups.                                                                                                                                                                                                                                                                                                                                                                                                                                                                                                                                                                                                                          | Reported no adverse events               | Y = 0 tally | N = 0 tally      |                                                               |
| (Cheing and Hui-Chan, 1999)                                                              | <sup>61</sup>                                                               | No statements present                                                                                                                                                                                                                                                                                                                                                                                                                                                                                                                                                                                                                                                                     | No information to extract                | N           | N                |                                                               |
| (Cheing and Luk, 2005)                                                                   | <sup>62</sup>                                                               | No statements present                                                                                                                                                                                                                                                                                                                                                                                                                                                                                                                                                                                                                                                                     | No information to extract                | N           | N                |                                                               |
| (Cheing et al., 2002)                                                                    | <sup>63</sup>                                                               | No statements present                                                                                                                                                                                                                                                                                                                                                                                                                                                                                                                                                                                                                                                                     | No information to extract                | N           | N                |                                                               |
| (Cheing et al., 2003)                                                                    | <sup>64</sup>                                                               | No statements present                                                                                                                                                                                                                                                                                                                                                                                                                                                                                                                                                                                                                                                                     | No information to extract                | N           | N                |                                                               |
| (Chellappa and Thirupathy, 2020)                                                         | <sup>65</sup>                                                               | No statements present                                                                                                                                                                                                                                                                                                                                                                                                                                                                                                                                                                                                                                                                     | No information to extract                | N           | N                |                                                               |
| (Cherian et al., 2016a) – Primary Report<br><br>Secondary Report (Cherian et al., 2016b) | <sup>66</sup> – Primary Report<br><br>Secondary Report<br><br><sup>67</sup> | Patients were observed for adverse effects due to the TENS device throughout the study. Reports were rare but included local irritation at site of pad placement (n = 2) and irritation due to improper brace fitting (n = 1). All of these were minor and self-limited and did not prevent any patients from continuing a full course of TENS treatment (3 months). There were no serious adverse reactions reported. In addition, patients were evaluated for the need for surgery, either total knee arthroplasty or arthroscopy.<br><br>From <sup>67</sup> secondary report: Adverse events seen during the trial included skin irritation, increased pain, and local skin breakdown. | Skin irritation – no further information | Y           | N                | No numerical data from the control group means cannot extract |
| (Chesterton et al., 2013)<br><br>Secondary Report (Lewis et al., 2015)                   | <sup>68</sup><br><br>Secondary Report<br><br><sup>69</sup>                  | No adverse reactions to treatment were recorded.                                                                                                                                                                                                                                                                                                                                                                                                                                                                                                                                                                                                                                          | Reported no adverse events               | Y = 0 tally | N = 0 tally      |                                                               |
| (Chia et al., 1990)                                                                      | <sup>70</sup>                                                               | No statements present                                                                                                                                                                                                                                                                                                                                                                                                                                                                                                                                                                                                                                                                     | No information to extract                | N           | N                |                                                               |
| (Chiou et al., 2019)                                                                     | <sup>71</sup>                                                               | No statements present                                                                                                                                                                                                                                                                                                                                                                                                                                                                                                                                                                                                                                                                     | No information to extract                | N           | N                |                                                               |

| Reference                       | Reference number | Extracted Text                                                                                                                                                                                                                                                                                                                                                                                                                                                                                                                                                                                                                                         | AEs related to TENS                                                | Statement   | Extractable Data | Comment                                                                                                                                                                                                                   |
|---------------------------------|------------------|--------------------------------------------------------------------------------------------------------------------------------------------------------------------------------------------------------------------------------------------------------------------------------------------------------------------------------------------------------------------------------------------------------------------------------------------------------------------------------------------------------------------------------------------------------------------------------------------------------------------------------------------------------|--------------------------------------------------------------------|-------------|------------------|---------------------------------------------------------------------------------------------------------------------------------------------------------------------------------------------------------------------------|
| (Chitsaz et al., 2009)          | 72               | TENS: Lost to follow-up (n=1) due to difficulties keeping appointments. Nortriptyline: Withdrawal (n=3) due to adverse effects. Nortriptyline was generally well tolerated and most of the adverse events reported were mild in severity. The most common side effects of nortriptyline were dry mouth (n=13), dizziness (n=6), constipation (n=5), urinary retention (n=5), nausea and headache (n=4). In 3 participants, this resulted in early discontinuation of nortriptyline and the dose of nortriptyline could not be increased per protocol due to these side effects.<br><br>There were no statements about adverse events for TENS present. | Adverse events only in Nortriptyline group.                        | Y           | Y                | Data:<br>Use dropout data resulting from AEs<br><br>TENS = 0<br>Nortriptyline = 3                                                                                                                                         |
| (Chiu et al., 2005)             | 73               | No complications occurred because of any of the treatments given. The reasons for the withdrawals included insufficient time, dissatisfaction with treatment outcome and worsening of symptoms (Figure 2). 1 withdrawal from TENS group due to worsening of symptoms                                                                                                                                                                                                                                                                                                                                                                                   | Reported no adverse events                                         | Y = 0 tally | N = 0 tally      |                                                                                                                                                                                                                           |
| (Cipriano et al., 2008)         | 74               | Electrical stimulation was well-tolerated by all patients and no relevant side effect was observed.                                                                                                                                                                                                                                                                                                                                                                                                                                                                                                                                                    | Reported no adverse events                                         | Y = 0 tally | N = 0 TENS ONLY  |                                                                                                                                                                                                                           |
| (Cipriano et al., 2014)         | 75               | TENS was well tolerated by all patients with no reported side effects.                                                                                                                                                                                                                                                                                                                                                                                                                                                                                                                                                                                 | Reported no adverse events                                         | Y = 0 tally | N = 0 TENS ONLY  |                                                                                                                                                                                                                           |
| (Coelho de Amorim et al., 2014) | 76               | No statements present                                                                                                                                                                                                                                                                                                                                                                                                                                                                                                                                                                                                                                  | No information to extract                                          | N           | N                |                                                                                                                                                                                                                           |
| (Cooperman et al., 1977)        | 77               | No statements present                                                                                                                                                                                                                                                                                                                                                                                                                                                                                                                                                                                                                                  | No information to extract                                          | N           | N                |                                                                                                                                                                                                                           |
| (Coyne et al., 1995)            | 78               | No statements present                                                                                                                                                                                                                                                                                                                                                                                                                                                                                                                                                                                                                                  | No information to extract                                          | N           | N                |                                                                                                                                                                                                                           |
| (Crompton et al., 1992)         | 79               | However, a substantial proportion of women who used the device found it frightening or unpleasant, which we consider unacceptable in the absence of an improvement in pain scores.                                                                                                                                                                                                                                                                                                                                                                                                                                                                     | Participants found the TENS device 'frightening' and 'unpleasant'. | Y           | N                | No numerical data                                                                                                                                                                                                         |
| (Cuschieri et al., 1985)        | 80               | All patients tolerated the TES device well.                                                                                                                                                                                                                                                                                                                                                                                                                                                                                                                                                                                                            | Reported no adverse events                                         | Y = 0 tally | N = 0 TENS ONLY  |                                                                                                                                                                                                                           |
| (Cuschieri et al., 1987)        | 81               | No untoward side effects were noted.                                                                                                                                                                                                                                                                                                                                                                                                                                                                                                                                                                                                                   | Reported no adverse events                                         | Y = 0 tally | N = 0 tally      |                                                                                                                                                                                                                           |
| (da Silva et al., 2008)         | 82               | No statements present                                                                                                                                                                                                                                                                                                                                                                                                                                                                                                                                                                                                                                  | No information to extract                                          | N           | N                |                                                                                                                                                                                                                           |
| (da Silva et al., 2015)         | 83               | No adverse effects were observed in the TENS group, but 33.3 % of patients in the control group reported drowsiness and nausea.                                                                                                                                                                                                                                                                                                                                                                                                                                                                                                                        | Reported no adverse events in TENS group                           | Y           | Y                | The authors reported stated that 'adverse events for TENS' was an outcome and they presented this data as AEs attributable to the interventions per se. For this reason, we have extracted the data. Nevertheless, we are |

| Reference             | Reference number | Extracted Text                                                                                                                                                                                                                                                                                                                                                                                                                                                                                                                                                                                                                                                                                                                                                                                                                                                                                                                                                                                                                                                                                                                                                                                                                                                                                                                                                                                                                                                                                                                                                                                                                                                                                                                                                                                                                                          | AEs related to TENS       | Statement | Extractable Data | Comment                                                                                                                                                                                                                                                                                                                                                                                                                                                                                                                                                                                    |
|-----------------------|------------------|---------------------------------------------------------------------------------------------------------------------------------------------------------------------------------------------------------------------------------------------------------------------------------------------------------------------------------------------------------------------------------------------------------------------------------------------------------------------------------------------------------------------------------------------------------------------------------------------------------------------------------------------------------------------------------------------------------------------------------------------------------------------------------------------------------------------------------------------------------------------------------------------------------------------------------------------------------------------------------------------------------------------------------------------------------------------------------------------------------------------------------------------------------------------------------------------------------------------------------------------------------------------------------------------------------------------------------------------------------------------------------------------------------------------------------------------------------------------------------------------------------------------------------------------------------------------------------------------------------------------------------------------------------------------------------------------------------------------------------------------------------------------------------------------------------------------------------------------------------|---------------------------|-----------|------------------|--------------------------------------------------------------------------------------------------------------------------------------------------------------------------------------------------------------------------------------------------------------------------------------------------------------------------------------------------------------------------------------------------------------------------------------------------------------------------------------------------------------------------------------------------------------------------------------------|
|                       |                  |                                                                                                                                                                                                                                                                                                                                                                                                                                                                                                                                                                                                                                                                                                                                                                                                                                                                                                                                                                                                                                                                                                                                                                                                                                                                                                                                                                                                                                                                                                                                                                                                                                                                                                                                                                                                                                                         |                           |           |                  | concerned that this data reflects efficacy of interventions to reduce AEs (drowsiness, nausea,) associated with drugs (morphine, Dipyron) rather than TENS<br><br>Data:<br>TENS = 0 events / 21<br>Control = 7 events / 21 participants                                                                                                                                                                                                                                                                                                                                                    |
| (Dailey et al., 2013) | <sup>84</sup>    | No statements present                                                                                                                                                                                                                                                                                                                                                                                                                                                                                                                                                                                                                                                                                                                                                                                                                                                                                                                                                                                                                                                                                                                                                                                                                                                                                                                                                                                                                                                                                                                                                                                                                                                                                                                                                                                                                                   | No information to extract | N         | N                |                                                                                                                                                                                                                                                                                                                                                                                                                                                                                                                                                                                            |
| (Dailey et al., 2020) | <sup>85</sup>    | <p>There were 30 adverse events related to TENS intervention in 30 participants on visits 1, 2, or 3. The most common adverse events were pain with TENS (4.8% in the active TENS group, 4% in the placebo TENS group, and 1% in the no TENS group) and skin irritation with electrodes (4.8% in the active TENS group, 1% in the placebo TENS group, and 0% in the no TENS group). Adverse events reported on visit 2 occurred during the first treatment at that visit, and adverse events reported on visit 3 were during treatment at that visit and during the 4-week period of home use.</p> <p>Serious Adverse Events.<br/>In the course of the trial, four serious adverse events (study related, n=1 and non-study related, n=3) were reported between April 2014 and April 2016 and all were categorized as hospitalization. For the study related event, the participant complained of chest pain during the 6MWT, was admitted to ER, hospitalized without diagnosed myocardial damage and recovered with treatment. For the three participant's categorized as non-study related: (1) report of chest pain at home, referred to primary care provider, admitted to ER and hospitalized with changes for thyroid medication and recovered with treatment (2) report of GI symptoms, admitted to hospital for dehydration and recovered with treatment and (3) report of depression, admitted to hospital for treatment and condition was still present and being treated at the end of her participation in the study. As a group, for these four participants, the average age was 49.75 years, ranging from 40 to 59 years. With respect to treatment group, one event occurred prior to randomization and three occurred after randomization to treatment groups (placebo-TENS, n=1 and no-TENS, n=2). The participants were further</p> | Y                         | Y         | Y                | <p>TENS = 17/103<br/>Placebo = 3/119</p> <p>Taken from data in Supplementary Table 7, available on the Arthritis &amp; Rheumatology web site at <a href="http://onlinelibrary.wiley.com/doi/10.1002/art.41170/abstract">http://onlinelibrary.wiley.com/doi/10.1002/art.41170/abstract</a>, shows rates of TENS-related Adverse events by visit. There were 4 serious adverse events, with none related to TENS use (Supplementary Results, <a href="http://onlinelibrary.wiley.com/doi/10.1002/art.41170/abstract">http://onlinelibrary.wiley.com/doi/10.1002/art.41170/abstract</a>).</p> |

| Reference                  | Reference number            | Extracted Text                                                                                                                                                                                                                                                                                                                                                                                                                                                                                                                                                                                                                                                                                                                                                                                                                                                                                                                                                                                                                | AEs related to TENS                                                                                                      | Statement   | Extractable Data | Comment                                                                                                                                                               |
|----------------------------|-----------------------------|-------------------------------------------------------------------------------------------------------------------------------------------------------------------------------------------------------------------------------------------------------------------------------------------------------------------------------------------------------------------------------------------------------------------------------------------------------------------------------------------------------------------------------------------------------------------------------------------------------------------------------------------------------------------------------------------------------------------------------------------------------------------------------------------------------------------------------------------------------------------------------------------------------------------------------------------------------------------------------------------------------------------------------|--------------------------------------------------------------------------------------------------------------------------|-------------|------------------|-----------------------------------------------------------------------------------------------------------------------------------------------------------------------|
|                            |                             | categorized by medication (opioid, n=1 and non-opioid, n=3) and location (TN, n=3 and IA, n=1).                                                                                                                                                                                                                                                                                                                                                                                                                                                                                                                                                                                                                                                                                                                                                                                                                                                                                                                               |                                                                                                                          |             |                  |                                                                                                                                                                       |
| (Davies, 1982)             | <sup>86</sup>               | No statements present                                                                                                                                                                                                                                                                                                                                                                                                                                                                                                                                                                                                                                                                                                                                                                                                                                                                                                                                                                                                         | No information to extract                                                                                                | N           | N                |                                                                                                                                                                       |
| (Dawood and Ramos, 1990)   | <sup>87</sup>               | Four subjects noticed muscle vibrations, change in stimulation with movements, tightness, headaches after use, and a slight redness or a burning sensation with TENS treatment. No mention of AEs in the Ibuprofen group                                                                                                                                                                                                                                                                                                                                                                                                                                                                                                                                                                                                                                                                                                                                                                                                      | Reported no adverse events                                                                                               | Y           | N = 0 TENS ONLY  | No numerical data for the comparison groups (placebo, ibuprofen)                                                                                                      |
| (De Angelis et al., 2003)  | <sup>88</sup>               | No differences in side effects were observed between TENS versus no TENS groups.<br>... the incidence of nausea was quite high in this patient sample as compared with other studies (group TENS, 8.5%; group No TENS, 11.3%) (11, 12), but this symptom was mentioned by the patient only when specifically elicited and it was probably the result of psychosomatic factors or emotional stress. However, shoulder pain was more frequent, albeit not significantly, in group TENS than in group Control (group A, 3%; group B, 0%). This is probably due to the fact that the examination lasted longer in group A than in group B (group A, 134.1 60 seconds; group B, 117 49 seconds; P .054) (using the same CO2 flow) and that the patients' acceptance of the procedure was higher with the use of the TENS device. It is completely safe, noninvasive, and free from any side effects ... as far as side effects are concerned, there were no statistically significant differences in favor of the TENS device..... | Coded as: Reported no adverse events<br><br>Extract data<br>AEs = Nausea and<br>Shoulder pain but not attributed to pain | Y = 0 tally | N = 0 tally      | No data extracted<br><br>It is difficult to ascertain whether these symptoms were AEs or due to treatment intervention of surgical procedure<br><br>No data extracted |
| (De Giorgi et al., 2017)   | <sup>89</sup>               | No side effects were referred by the patients during the 10-week TENS treatment.                                                                                                                                                                                                                                                                                                                                                                                                                                                                                                                                                                                                                                                                                                                                                                                                                                                                                                                                              | Reported no adverse events                                                                                               | Y = 0 tally | N = 0 TENS ONLY  |                                                                                                                                                                       |
| (de Oliveira, 2012)        | <sup>90</sup>               | No statements present                                                                                                                                                                                                                                                                                                                                                                                                                                                                                                                                                                                                                                                                                                                                                                                                                                                                                                                                                                                                         | No information to extract                                                                                                | N           | N                |                                                                                                                                                                       |
| (de Orange et al., 2003)   | <sup>91</sup>               | No statements present                                                                                                                                                                                                                                                                                                                                                                                                                                                                                                                                                                                                                                                                                                                                                                                                                                                                                                                                                                                                         | No information to extract                                                                                                | N           | N                |                                                                                                                                                                       |
| (de Sousa et al., 2014)    | <sup>92</sup>               | No statements present                                                                                                                                                                                                                                                                                                                                                                                                                                                                                                                                                                                                                                                                                                                                                                                                                                                                                                                                                                                                         | No information to extract                                                                                                | N           | N                |                                                                                                                                                                       |
| (DeSantana et al., 2008)   | <sup>93</sup>               | We reinforce that the absence of complications and adverse effects of TENS compared with conventional opioids and nonopioid analgesics makes TENS a safe and reliable therapeutic procedure.                                                                                                                                                                                                                                                                                                                                                                                                                                                                                                                                                                                                                                                                                                                                                                                                                                  | Reported no adverse events                                                                                               | Y = 0 tally | N = 0 TENS ONLY  |                                                                                                                                                                       |
| (DeSantana et al., 2009)   | <sup>94</sup>               | We conclude that the absence of complications and adverse effects of TENS compared with conventional opioids and nonopioid analgesics makes TENS a safe and reliable therapeutic procedure.                                                                                                                                                                                                                                                                                                                                                                                                                                                                                                                                                                                                                                                                                                                                                                                                                                   | Reported no adverse events                                                                                               | Y = 0 tally | N = 0 TENS ONLY  |                                                                                                                                                                       |
| (Dewan and Sharma, 2011)   | <sup>95</sup>               | No statements present                                                                                                                                                                                                                                                                                                                                                                                                                                                                                                                                                                                                                                                                                                                                                                                                                                                                                                                                                                                                         | No information to extract                                                                                                | N           | N                |                                                                                                                                                                       |
| Deyo et al. (1990)         | Deyo , Wals h <sup>96</sup> | Approximately one-third of the subjects reported minor skin irritation at the sites of electrode placement, with equal proportions in the true-TENS and sham-TENS groups.                                                                                                                                                                                                                                                                                                                                                                                                                                                                                                                                                                                                                                                                                                                                                                                                                                                     | Skin irritation.<br>One subject had to discontinue due to severe dermatitis.                                             | Y           | N                | No numerical data                                                                                                                                                     |
| (Dibenedetto et al., 1993) | <sup>97</sup>               | Both treatments were well-tolerated and no side-effects reported.                                                                                                                                                                                                                                                                                                                                                                                                                                                                                                                                                                                                                                                                                                                                                                                                                                                                                                                                                             | Reported no adverse events                                                                                               | Y = 0 tally | N = 0 tally      |                                                                                                                                                                       |

| Reference                                       | Reference number                | Extracted Text                                                                                                                                                                                                                                                                                                                                                                                                                                              | AEs related to TENS                                | Statement   | Extractable Data | Comment                                                                                           |
|-------------------------------------------------|---------------------------------|-------------------------------------------------------------------------------------------------------------------------------------------------------------------------------------------------------------------------------------------------------------------------------------------------------------------------------------------------------------------------------------------------------------------------------------------------------------|----------------------------------------------------|-------------|------------------|---------------------------------------------------------------------------------------------------|
| (Dilekci et al., 2016)                          | <sup>98</sup>                   | No statements present                                                                                                                                                                                                                                                                                                                                                                                                                                       | No information to extract                          | N           |                  |                                                                                                   |
| (Dissanayaka et al., 2016)                      | <sup>99</sup>                   | No statements present                                                                                                                                                                                                                                                                                                                                                                                                                                       | No information to extract                          | N           | N                |                                                                                                   |
| (Dogu et al., 2008)                             | <sup>100</sup>                  | No statements present                                                                                                                                                                                                                                                                                                                                                                                                                                       | No information to extract                          | N           | N                |                                                                                                   |
| (Domaille and Reeves, 1997)                     | <sup>101</sup>                  | No statements present                                                                                                                                                                                                                                                                                                                                                                                                                                       | No information to extract                          | N           | N                |                                                                                                   |
| (Ebadi et al., 2018)                            | <sup>102</sup>                  | As for side effects, 8 patients in the Diadynamic group reported a burning sensation in the first 3-4 min of the treatment.                                                                                                                                                                                                                                                                                                                                 | Reported no adverse events in TENS group.          | Y           | N                | No numerical data for TENS                                                                        |
| (Ekblom and Hansson, 1987)                      | <sup>103</sup>                  | No statements present                                                                                                                                                                                                                                                                                                                                                                                                                                       | No information to extract                          | N           | N                |                                                                                                   |
| (Ekim et al., 2008)                             | <sup>104</sup>                  | No statements present                                                                                                                                                                                                                                                                                                                                                                                                                                       | No information to extract                          | N           | N                |                                                                                                   |
| (Elboim-Gabyzon et al., 2019)                   | <sup>105</sup>                  | No statements present                                                                                                                                                                                                                                                                                                                                                                                                                                       | No information to extract                          | N           | N                |                                                                                                   |
| (Elserty et al., 2016)                          | <sup>106</sup>                  | No statements present                                                                                                                                                                                                                                                                                                                                                                                                                                       | No information to extract                          | N           | N                |                                                                                                   |
| (Emmiler et al., 2008)                          | <sup>107</sup>                  | Post-op complications (atelectasia) were tabulated but not stated whether these were attributed to the intervention<br>TENS = 1/20(5%)<br>Placebo = 1/20(5%)<br>Control = 4/20 (20%)                                                                                                                                                                                                                                                                        | Reported adverse events (complication) atelectasis | Y           | N                | No data extracted – unclear whether ‘complications’ attributable to the treatment                 |
| (Engen et al., 2016)                            | <sup>108</sup>                  | No statements present                                                                                                                                                                                                                                                                                                                                                                                                                                       | No information to extract                          | N           | N                |                                                                                                   |
| (Erden and Senol Celik, 2015)                   | <sup>109</sup>                  | No statements present                                                                                                                                                                                                                                                                                                                                                                                                                                       | No information to extract                          | N           | N                |                                                                                                   |
| (Erdogan et al., 2005)                          | <sup>110</sup>                  | We did not observe any side effects using TENS, although we did not use TENS in patients who had cardiac disease.                                                                                                                                                                                                                                                                                                                                           | Reported no adverse events                         | Y = 0 tally | N = 0 TENS ONLY  |                                                                                                   |
| (Erkkola et al., 1980)                          | <sup>111</sup>                  | No statements present                                                                                                                                                                                                                                                                                                                                                                                                                                       | No information to extract                          | N           | N                |                                                                                                   |
| (Escortell-Mayor et al., 2011)                  | <sup>112</sup>                  | It is remarkable, as it is described in a publication done by this group, that no important adverse effects were observed from either therapy - Reported no adverse events <sup>112</sup> p70                                                                                                                                                                                                                                                               | Information to extract                             | Y           | Y                | Data extracted from secondary report <sup>113</sup> :<br>TENS = 7 events<br>Manual Therapy = 3    |
| Secondary Report (Escortell Mayor et al., 2008) | Secondary Report <sup>113</sup> | Translated from <sup>113</sup> p340<br>16.3% of treated patients with TENS (n = 7) and 6.4% of those treated with manual therapy (n = 3) reported adverse effects related to treatment. Three of them presented increased pain in the treated area and 1, general poor physical condition in the group treated with TENS Of those who received therapy manual, 1 patient referred a clinical worsening the first days and the rest did not detail symptoms. |                                                    |             |                  | The statement on AEs in <sup>112</sup> p70 appears to contradict data presented in <sup>113</sup> |
| (Esteban Gonzalez et al., 2015)                 | <sup>114</sup>                  | There were no complications, intolerances or other problems that required the intervention with TENS to be suspended in any of the 50 patients.                                                                                                                                                                                                                                                                                                             | Reported no adverse events                         | Y = 0 tally | N = 0 TENS ONLY  |                                                                                                   |
| (Eyigor et al., 2008)                           | <sup>115</sup>                  | No statements present                                                                                                                                                                                                                                                                                                                                                                                                                                       | No information to extract                          | N           | N                |                                                                                                   |

| Reference                    | Reference number | Extracted Text                                                                                                                                                                                                                                                        | AEs related to TENS                         | Statement   | Extractable Data | Comment                                                       |
|------------------------------|------------------|-----------------------------------------------------------------------------------------------------------------------------------------------------------------------------------------------------------------------------------------------------------------------|---------------------------------------------|-------------|------------------|---------------------------------------------------------------|
| (Eyigor et al., 2010)        | <sup>116</sup>   | No significant adverse event was reported in either of the two groups (p>0.05).                                                                                                                                                                                       | Reported no adverse events                  | Y = 0 tally | N = 0 tally      |                                                               |
| (Facci et al., 2011)         | <sup>117</sup>   | No statements present                                                                                                                                                                                                                                                 | No information to extract                   | N           | N                |                                                               |
| (Farahani et al., 2014)      | <sup>118</sup>   | No statements present                                                                                                                                                                                                                                                 | No information to extract                   | N           | N                |                                                               |
| (Farina et al., 2004)        | <sup>119</sup>   | No statements present                                                                                                                                                                                                                                                 | No information to extract                   | N           | N                |                                                               |
| (Fatima and Sarfraz, 2019)   | <sup>120</sup>   | No statements present                                                                                                                                                                                                                                                 | No information to extract                   | N           | N                |                                                               |
| (Ferraz and Moreira, 2009)   | <sup>121</sup>   | No statements present                                                                                                                                                                                                                                                 | No information to extract                   | N           | N                |                                                               |
| (Ferreira et al., 2011)      | <sup>122</sup>   | No statements present                                                                                                                                                                                                                                                 | No information to extract                   | N           | N                |                                                               |
| (Ferreira et al., 2017)      | <sup>123</sup>   | No statements present                                                                                                                                                                                                                                                 | No information to extract                   | N           | N                | Dropouts reported but reasons not given                       |
| (Finsen et al., 1988)        | <sup>124</sup>   | No statements present                                                                                                                                                                                                                                                 | No information to extract                   | N           | N                |                                                               |
| (Fiorelli et al., 2012)      | <sup>125</sup>   | We did not observe any side effects; thus, TENS may be particularly useful for patients that have liver or kidney disease.....                                                                                                                                        | Reported no adverse events                  | Y = 0 tally | N = 0 tally      |                                                               |
| (Fodor-Sertl et al., 1990)   | <sup>126</sup>   | No statements present                                                                                                                                                                                                                                                 | No information to extract                   | N           | N                |                                                               |
| (Forogh et al., 2019)        | <sup>127</sup>   | No adverse events occurred and the rate of compliance to the exercise program was high in both groups                                                                                                                                                                 | Reported no adverse events                  | Y = 0 tally | N = 0 tally      |                                                               |
| (Forst et al., 2004)         | <sup>128</sup>   | No statements present                                                                                                                                                                                                                                                 | No information to extract                   | N           | N                |                                                               |
| (Forster et al., 1994)       | <sup>129</sup>   | No statements present                                                                                                                                                                                                                                                 | No information to extract                   | N           | N                |                                                               |
| (Fujii-Abe et al., 2019)     | <sup>130</sup>   | None of the study patients suffered any abnormal or harmful effects.                                                                                                                                                                                                  | Reported no adverse events                  | Y = 0 tally | N                |                                                               |
| (Galli et al., 2015)         | <sup>131</sup>   | No statements present                                                                                                                                                                                                                                                 | No information to extract                   | N           | N                |                                                               |
| (Galloway et al., 1984)      | <sup>132</sup>   | Only one of our patients demonstrated any adverse effects of the treatment in the form of an allergic rash with blistering which, in patter, was seen to correspond exactly with the areas of contact with the adhesive incorporated in the sterile wound electrodes. | Allergic skin irritation in one participant | Y           | N                | No numerical data                                             |
| (Garcia-Perez et al., 2018)  | <sup>133</sup>   | No statements present                                                                                                                                                                                                                                                 | No information to extract                   | N           | N                |                                                               |
| (Gerson et al., 1977)        | <sup>134</sup>   | No statements present                                                                                                                                                                                                                                                 | No information to extract                   | N           | N                |                                                               |
| (Ghoname et al., 1999a)      | <sup>135</sup>   | No statements present                                                                                                                                                                                                                                                 | No information to extract                   | N           | N                |                                                               |
| (Ghoname et al., 1999b)      | <sup>136</sup>   | No statements present                                                                                                                                                                                                                                                 | No information to extract                   | N           | N                |                                                               |
| (Gilbert et al., 1986)       | <sup>137</sup>   | No statements present                                                                                                                                                                                                                                                 | No information to extract                   | N           | N                |                                                               |
| (Grabiańska et al., 2015)    | <sup>138</sup>   | No statements present                                                                                                                                                                                                                                                 | No information to extract                   | N           | N                |                                                               |
| (Graff-Radford et al., 1989) | <sup>139</sup>   | No statements present                                                                                                                                                                                                                                                 | No information to extract                   | N           | N                | Patients were informed about possible side-effects beforehand |
| (Grant et al., 1999)         | <sup>140</sup>   | .....three TENS patients developed skin reactions. Other than these, reported side effects were minimal: three acupuncture patients reported dizziness and three TENS patients developed skin reactions.                                                              | Skin reactions in 3 participants            | Y           | Y                | Data extracted:<br>TENS = 3 events<br>Acupuncture = 3 events  |
| (Gregorini et al., 2010)     | <sup>141</sup>   | No statements present                                                                                                                                                                                                                                                 | No information to extract                   | N           | N                |                                                               |
| (Grimmer, 1992)              | <sup>142</sup>   | No statements present                                                                                                                                                                                                                                                 | No information to extract                   | N           | N                |                                                               |
| (Gschiel et al., 2010)       | <sup>143</sup>   | Overall, there were no side effects.                                                                                                                                                                                                                                  | Inferred no adverse events                  | Y           | N = 0 tally      | No numerical data                                             |



| Reference                     | Reference number | Extracted Text                                                                                                                                                                                                                                                                                                                                                                                          | AEs related to TENS                                                                                                  | Statement | Extractable Data | Comment                                                                                |
|-------------------------------|------------------|---------------------------------------------------------------------------------------------------------------------------------------------------------------------------------------------------------------------------------------------------------------------------------------------------------------------------------------------------------------------------------------------------------|----------------------------------------------------------------------------------------------------------------------|-----------|------------------|----------------------------------------------------------------------------------------|
| (Gunay Ucurum et al., 2018)   | <sup>144</sup>   | No statements present                                                                                                                                                                                                                                                                                                                                                                                   | No information to extract                                                                                            | N         | N                |                                                                                        |
| (Guo and Jia, 2005)           | <sup>145</sup>   | No statements present                                                                                                                                                                                                                                                                                                                                                                                   | No information to extract                                                                                            | N         | N                |                                                                                        |
| (Hamza et al., 1999)          | <sup>146</sup>   | ...16 -20% of the patients in each of the four groups complained that the TENS adversely influenced their quality of sleep because of the presence of the cutaneous electrodes and wires.                                                                                                                                                                                                               | Sleep interference because of electrodes/wires.                                                                      | Y         | N                | No numerical data for other groups                                                     |
| (Hanfy and El-Bigawy, 2004)   | <sup>147</sup>   | No statements present<br>During the study TENS therapy was safe and allowed the patients to remain ambulatory.                                                                                                                                                                                                                                                                                          | No information to extract                                                                                            | N         | N                | No specific comments on adverse events included                                        |
| (Hansson and Ekblom, 1983)    | <sup>148</sup>   | ... it should be noted that most patients found the muscle twitches produced by the low frequency TENS uncomfortable.                                                                                                                                                                                                                                                                                   | No information to extract                                                                                            | N         | N                | No specific comments on adverse events included                                        |
| (Hansson et al., 1986)        | <sup>149</sup>   | No statements present                                                                                                                                                                                                                                                                                                                                                                                   | No information to extract                                                                                            | N         | N                |                                                                                        |
| (Hargreaves and Lander, 1989) | <sup>150</sup>   | No statements present                                                                                                                                                                                                                                                                                                                                                                                   | No information to extract                                                                                            | N         | N                | Authors state that TENS is safe but no specific comments on side-effects in this study |
| (Harrison et al., 1986)       | <sup>151</sup>   | In the present study, like all others reported to-date, no side-effects were noted from the therapy.                                                                                                                                                                                                                                                                                                    | Reported no adverse events                                                                                           | Y         | N = 0 tally      | No numerical data                                                                      |
| (Hart et al., 2012)           | <sup>152</sup>   | No statements present                                                                                                                                                                                                                                                                                                                                                                                   | No information to extract                                                                                            | N         | N                |                                                                                        |
| (Hazneci et al., 2005)        | <sup>153</sup>   | No statements present                                                                                                                                                                                                                                                                                                                                                                                   | No information to extract                                                                                            | N         | N                |                                                                                        |
| (Herrera-Lasso et al., 1993)  | <sup>154</sup>   | No statements present                                                                                                                                                                                                                                                                                                                                                                                   | No information to extract                                                                                            | N         | N                |                                                                                        |
| (Hershman M, 1989)            | <sup>155</sup>   | No statements present                                                                                                                                                                                                                                                                                                                                                                                   | No information to extract                                                                                            | N         | N                |                                                                                        |
| (Hou et al., 2002)            | <sup>156</sup>   | No statements present                                                                                                                                                                                                                                                                                                                                                                                   | No information to extract                                                                                            | N         | N                |                                                                                        |
| (Hokenek et al., 2020)        | <sup>157</sup>   | No treatment-related skin reactions or unwanted effects were encountered during the trial. Of the verum group, 3 patients declined continuation of treatment due to intolerance to paresthesia, and 2 patients in the sham group declined to continue treatment due to intolerable pain. These patients opted to instead receive 0.75 mg/kg meperidine rescue therapy and were excluded from the trial. | Unclear whether these are adverse events or dislike of TENS sensation and worsening pain due to non response to sham | Y         | N                |                                                                                        |
| (Hruby et al., 2006)          | <sup>158</sup>   | No statements present                                                                                                                                                                                                                                                                                                                                                                                   | No information to extract                                                                                            | N         | N                |                                                                                        |
| (Hsieh et al., 1992)          | <sup>159</sup>   | No statements present<br>... One-shot TENS treatment may be recommended due to the rarity of side effects and its convenient application.                                                                                                                                                                                                                                                               | No information to extract                                                                                            | N         | N                |                                                                                        |
| (Hsueh et al., 1997)          | <sup>160</sup>   | No statements present                                                                                                                                                                                                                                                                                                                                                                                   | No information to extract                                                                                            | N         | N                |                                                                                        |
| (Hughes et al., 1988)         | <sup>161</sup>   | The use of TENS had no adverse effects upon the newborn                                                                                                                                                                                                                                                                                                                                                 | Reported no adverse events                                                                                           | Y         | N = 0 TENS ONLY  | No numerical data                                                                      |
| (Husch et al., 2020)          | <sup>162</sup>   | No statements present                                                                                                                                                                                                                                                                                                                                                                                   | No information to extract                                                                                            | N         | N                |                                                                                        |
| (Ilhanli, 2015)               | <sup>163</sup>   | There were no adverse events due to treatment regimens.                                                                                                                                                                                                                                                                                                                                                 | Reported no adverse events                                                                                           | Y         | N = 0            |                                                                                        |
| (Inal et al., 2016)           | <sup>164</sup>   | No statements present                                                                                                                                                                                                                                                                                                                                                                                   | No information to extract                                                                                            | N         | N                |                                                                                        |

| Reference                    | Reference number | Extracted Text                                                                                                                                                                                                                                                                                                                                                                                                                                              | AEs related to TENS           | Statement | Extractable Data   | Comment                                                                                                                                        |
|------------------------------|------------------|-------------------------------------------------------------------------------------------------------------------------------------------------------------------------------------------------------------------------------------------------------------------------------------------------------------------------------------------------------------------------------------------------------------------------------------------------------------|-------------------------------|-----------|--------------------|------------------------------------------------------------------------------------------------------------------------------------------------|
| (Isik et al., 2017)          | <sup>165</sup>   | There were no serious side effects in both groups. In the TENS group no side effects were reported although 21 of the patients reported the treatment as boring due to the long hospital stay.<br>In the leech therapy group, there was a mild local itching and skin redness in 31 patients (12 patients required topical antihistamine therapy) and severe local itching and reddening in 3 patients (requiring oral plus topical antihistamine therapy). | Reported no adverse events    | Y         | Y                  | TENS = 0 events / 53 participants<br>Leech = 34 events / 52 participants                                                                       |
| (Jaafarpour et al., 2008)    | <sup>166</sup>   | No statements present                                                                                                                                                                                                                                                                                                                                                                                                                                       | No information to extract     | N         | N                  |                                                                                                                                                |
| (Jamison et al., 2019)       | <sup>167</sup>   | None of the participants reported experiencing any long-term adverse effects from using the hfTENS.                                                                                                                                                                                                                                                                                                                                                         | Reported no adverse events    | Y         | N = 0<br>TENS ONLY | No numerical data                                                                                                                              |
| (Jarzem et al., 2005)        | <sup>168</sup>   | No statements present                                                                                                                                                                                                                                                                                                                                                                                                                                       | No information to extract     | N         | N                  |                                                                                                                                                |
| (Jensen et al., 1985)        | <sup>169</sup>   | No statements present                                                                                                                                                                                                                                                                                                                                                                                                                                       | No information to extract     | N         | N                  |                                                                                                                                                |
| (Jensen et al., 1991)        | <sup>170</sup>   | No statements present                                                                                                                                                                                                                                                                                                                                                                                                                                       | No information to extract     | N         | N                  |                                                                                                                                                |
| (Jones and Hutchinson, 1991) | <sup>171</sup>   | Three patients complained of dizziness after Entonox inhalation. There were no other side-effects of any of the treatments. TENS produced no side-effects, is easier to handle and was subjectively preferred by the patients.                                                                                                                                                                                                                              | Reported no adverse events    | Y         | N = 0              | No data extracted<br>Multiple cross over study with possibility of contamination between treatments                                            |
| (Kara et al., 2011)          | <sup>172</sup>   | Furthermore, there were no adverse effects or negative results related to TENS application.                                                                                                                                                                                                                                                                                                                                                                 | Reported no adverse events    | Y         | N = 0<br>TENS ONLY | No numerical data                                                                                                                              |
| (Kararmaz et al., 2004)      | <sup>173</sup>   | TENS is a non-invasive, safe, and simple treatment method, which does not have any systemic side effects. We did not observe any difficulties in the use of TENS. NOTE: Table 4 records side effects associated with ESWL procedure as an efficacy measure                                                                                                                                                                                                  | Reported no adverse events    | Y         | N = 0<br>TENS ONLY | No numerical data associated with AEs due to treatment interventions under study<br><br>The only side-effects reported were medication-induced |
| (Kayman-Kose et al., 2014)   | <sup>174</sup>   | No adverse effects due to TENS occurred during the study period - for both Cesarean and vaginal delivery data                                                                                                                                                                                                                                                                                                                                               | Reported no adverse events    | Y         | N = 0<br>TENS ONLY | No numerical data                                                                                                                              |
| (Keskin et al., 2012)        | <sup>175</sup>   | No adverse effect of TENS application on pregnant women was observed during the study.                                                                                                                                                                                                                                                                                                                                                                      | Reported no adverse events    | Y         | N                  | No numerical data for comparison group                                                                                                         |
| (Kibar et al., 2020)         | <sup>176</sup>   | No statements present                                                                                                                                                                                                                                                                                                                                                                                                                                       | No information to extract     | N         | N                  |                                                                                                                                                |
| (Kim et al., 2012)           | <sup>177</sup>   | There were no significant differences in the incidences of side effects such as erythema and itching between the groups ( $P > 0.05$ ). TENS Group 7/50 (14%) had erythema and 1/50 (2%) had itching. Table II of their report                                                                                                                                                                                                                              | Erythema and itching.         | Y         | Y                  | Data extracted:<br>TENS = 8 events / 50 participants<br>Placebo = 7 / 50 participants                                                          |
| (Kim et al., 2014)           | <sup>178</sup>   | No major adverse effects were reported by participants in any treatment group. One patient in the monotherapy group, one patient in the TENS+Np group, and one patient in the CAP+Np group experienced skin itching. One patient in the TENS+Np group and one patient in the HEAT+Np group                                                                                                                                                                  | Itching and sleep disturbance | Y         | Y                  | Data extracted (skin itching):<br>TENS + NSAID patch = 1 event / 24 participants                                                               |

| Reference                     | Reference number | Extracted Text                                                                                                                                                                                                                                                                                                                                                                                                                                                                                                                                                                                                                                                                                                                               | AEs related to TENS                              | Statement   | Extractable Data | Comment                                                                                                                                                                                                                                                                                                           |
|-------------------------------|------------------|----------------------------------------------------------------------------------------------------------------------------------------------------------------------------------------------------------------------------------------------------------------------------------------------------------------------------------------------------------------------------------------------------------------------------------------------------------------------------------------------------------------------------------------------------------------------------------------------------------------------------------------------------------------------------------------------------------------------------------------------|--------------------------------------------------|-------------|------------------|-------------------------------------------------------------------------------------------------------------------------------------------------------------------------------------------------------------------------------------------------------------------------------------------------------------------|
|                               |                  | reported sleep disturbance. Light somnolence was reported by one patient in the monotherapy group. However, all adverse effects had spontaneously resolved by the end of this study without any treatment. Participants' vital signs were in the normal                                                                                                                                                                                                                                                                                                                                                                                                                                                                                      |                                                  |             |                  | NSAID patch alone = 1 event / 25 participants                                                                                                                                                                                                                                                                     |
| (Kirupa et al., 2019)         | <sup>179</sup>   | No statements present                                                                                                                                                                                                                                                                                                                                                                                                                                                                                                                                                                                                                                                                                                                        | No information to extract                        | N           | N                |                                                                                                                                                                                                                                                                                                                   |
| (Knobel et al., 2005)         | <sup>180</sup>   | In this survey, more than 50% of women reported some discomfort in the use of electrodes type SSP and 25% in the use of electrodes plate type (Tab. 4). In the application of stimulation, no woman reported discomfort in none of the study groups. To assess the effectiveness of this care, therefore, research is needed to reveal the woman's opinion about the method                                                                                                                                                                                                                                                                                                                                                                  | Discomfort during stimulation                    | Y           | N                | No data extracted<br>Discomfort was an outcome measure – comparing two TENS electrodes.<br>We did not consider discomfort as an adverse event in this study                                                                                                                                                       |
| (Koca et al., 2014)           | <sup>181</sup>   | No serious complication was associated with the treatments in any group, and all patients generally tolerated the treatments well. Only two patients in the TENS group experienced mild tenderness at the application site.                                                                                                                                                                                                                                                                                                                                                                                                                                                                                                                  | Mild tenderness                                  | Y           | N                | No numerical data                                                                                                                                                                                                                                                                                                 |
| (Kofotolis et al., 2008)      | <sup>182</sup>   | No statements present                                                                                                                                                                                                                                                                                                                                                                                                                                                                                                                                                                                                                                                                                                                        | No information to extract                        |             | N                |                                                                                                                                                                                                                                                                                                                   |
| (Koke et al., 2004)           | <sup>183</sup>   | During the first period, skin irritation occurred in 9.4% (17/180) of all patients, adherence problems of electrodes in 12.2% (22/180) and problems attaching electrodes in 2.2% (4/180). In four patients, the adverse effects resulted in withdrawal from the study (skin-irritation 2X, problems attaching electrodes 2 X). During the second period, skin irritation was reported by 5.8% (10/171), adherence problems of electrodes 4.7% (8/171), and problems attaching electrodes body 2.9% (5/171). No significant differences in adverse effects were found between groups. At 6 months follow-up, 6 patients (3 in HFT–COT group and 3 in HIT–COT group) reported skin irritation due to TENS, but still could use TENS regularly. | Skin irritation<br>Problems attaching electrodes | Y           | N                | Could not extract data at 6 months follow-up (skin irritation) because could not ascertain the number of participants remaining in each group<br><br>High frequency TENS = 3 events<br>High intensity = 3<br><br>Cross-over study whereby all participants received an active TENS for all possible interventions |
| (Korkmaz et al., 2010)        | <sup>184</sup>   | No serious side-effects or complications were observed in either of the two groups (P>0.05).                                                                                                                                                                                                                                                                                                                                                                                                                                                                                                                                                                                                                                                 | Reported no adverse events                       | Y = 0 tally | N = 0 tally      | No numerical data                                                                                                                                                                                                                                                                                                 |
| (Kumar and Raje, 2014)        | <sup>185</sup>   | No statements present                                                                                                                                                                                                                                                                                                                                                                                                                                                                                                                                                                                                                                                                                                                        | No information to extract                        | N           | N                |                                                                                                                                                                                                                                                                                                                   |
| (Labrecque et al., 1999)      | <sup>186</sup>   | No statements present                                                                                                                                                                                                                                                                                                                                                                                                                                                                                                                                                                                                                                                                                                                        | No information to extract                        | N           | N                |                                                                                                                                                                                                                                                                                                                   |
| (Laitinen and Nuutinen, 1991) | <sup>187</sup>   | No statements present                                                                                                                                                                                                                                                                                                                                                                                                                                                                                                                                                                                                                                                                                                                        | No information to extract                        | N           | N                |                                                                                                                                                                                                                                                                                                                   |
| (Lang et al., 2007)           | <sup>188</sup>   | Because of its simple use and lack of side effects in our study population, we can recommend this technique for pain therapy.                                                                                                                                                                                                                                                                                                                                                                                                                                                                                                                                                                                                                | Reported no adverse events                       | Y           | N = 0 TENS ONLY  | No numerical data                                                                                                                                                                                                                                                                                                 |

| Reference                      | Reference number | Extracted Text                                                                                                                                                                                                                                                                                    | AEs related to TENS                        | Statement   | Extractable Data | Comment                                                                                                                                                                                                                                              |
|--------------------------------|------------------|---------------------------------------------------------------------------------------------------------------------------------------------------------------------------------------------------------------------------------------------------------------------------------------------------|--------------------------------------------|-------------|------------------|------------------------------------------------------------------------------------------------------------------------------------------------------------------------------------------------------------------------------------------------------|
| (Langley et al., 1984)         | <sup>189</sup>   | No adverse side-effects were reported by patients receiving TNS or placebo.                                                                                                                                                                                                                       | Reported no adverse events                 | Y = 0 tally | N = 0 tally      |                                                                                                                                                                                                                                                      |
| (Lauretti et al., 2013)        | <sup>190</sup>   | Concerning adverse effects, 2 patients from the STG got in sleep after the device application and complained of muscle sore due to more than 70-min active device application, which was subsequently improved by local hot application.                                                          | Muscle soreness in TENS group (2 patients) | Y           | N                | Note: the poor English in the quotation is how the text was written!                                                                                                                                                                                 |
| (Lauretti et al., 2015)        | <sup>191</sup>   | In conclusion, the portable TENS device demonstrated to be efficacious for pain relief and improvement of quality of life with no adverse effects for control of menstruation cramp pain.                                                                                                         | Reported no adverse events                 | Y           | N = 0 TENS ONLY  |                                                                                                                                                                                                                                                      |
| (Law and Cheing, 2004)         | <sup>192</sup>   | No statements present                                                                                                                                                                                                                                                                             | No information to extract                  | N           | N                |                                                                                                                                                                                                                                                      |
| (Law et al., 2004)             | <sup>193</sup>   | No statements present                                                                                                                                                                                                                                                                             | No information to extract                  | N           | N                |                                                                                                                                                                                                                                                      |
| (Leandri et al., 1990)         | <sup>194</sup>   | No statements present                                                                                                                                                                                                                                                                             | No information to extract                  | N           | N                |                                                                                                                                                                                                                                                      |
| (Lee et al., 1990)             | <sup>195</sup>   | No negative effects on the mothers and babies were reported.                                                                                                                                                                                                                                      | Reported no adverse events                 | Y = 0 tally | N = 0 tally      |                                                                                                                                                                                                                                                      |
| (Lee et al., 2015)             | <sup>196</sup>   | Neither expected nor unexpected AEs occurred in the study and control groups.                                                                                                                                                                                                                     | Reported no adverse events                 | Y = 0 tally | N = 0 tally      |                                                                                                                                                                                                                                                      |
| (Lee et al., 2019)             | <sup>197</sup>   | No statements present                                                                                                                                                                                                                                                                             | No information to extract                  | N           | N                |                                                                                                                                                                                                                                                      |
| (Leo et al., 1986)             | <sup>198</sup>   | No statements present                                                                                                                                                                                                                                                                             | No information to extract                  | N           | N                |                                                                                                                                                                                                                                                      |
| (Leonard et al., 2011)         | <sup>199</sup>   | No statements present                                                                                                                                                                                                                                                                             | No information to extract                  | N           | N                |                                                                                                                                                                                                                                                      |
| (Lewers et al., 1989)          | <sup>200</sup>   | No statements present                                                                                                                                                                                                                                                                             | No information to extract                  | N           | N                |                                                                                                                                                                                                                                                      |
| (Lewis et al., 1984)           | <sup>201</sup>   | No statements present                                                                                                                                                                                                                                                                             | No information to extract                  | N           | N                | One patient dropped out because of worsening pain.                                                                                                                                                                                                   |
| (Lewis et al., 1994)           | <sup>202</sup>   | No statements present                                                                                                                                                                                                                                                                             | No information to extract                  | N           | N                |                                                                                                                                                                                                                                                      |
| (Likar et al., 2001)           | <sup>203</sup>   | The side effects 1 patient in the Verum group about vomiting, 5 patients in the placebo group suffered from nausea and vomiting that are considered easy and were classified as medium.<br>TENS + analgesics = 1 event / 11 participants<br>Placebo TENS + analgesics = 5 event / 12 participants |                                            | Y           | N                | Data related to nausea and vomiting. Debatably this is related to AE associated with post op drugs rather than TENS.<br>We decided not to extract this data because nausea and vomiting AE of drugs reflects efficacy of TENS rather than AE of TENS |
| (Lim et al., 1983)             | <sup>204</sup>   | No statements present                                                                                                                                                                                                                                                                             | No information to extract                  | N           | N                |                                                                                                                                                                                                                                                      |
| (Lima et al., 2011)            | <sup>205</sup>   | No statements present                                                                                                                                                                                                                                                                             | No information to extract                  | N           | N                |                                                                                                                                                                                                                                                      |
| (Limoges and Rickabaugh, 2004) | <sup>206</sup>   | In addition, no adverse events secondary to TENS use or procedural complications occurred.                                                                                                                                                                                                        | Reported no adverse events                 | Y           | N = 0 TENS ONLY  | No numerical data                                                                                                                                                                                                                                    |
| (Lin et al., 2015)             | <sup>207</sup>   | No statements present                                                                                                                                                                                                                                                                             | No information to extract                  | N           | N                |                                                                                                                                                                                                                                                      |
| (Lin et al., 2019)             | <sup>208</sup>   | First, there were no adverse events (such as discomfort, hematoma, injury, or hyperalgia) throughout this study.                                                                                                                                                                                  | Reported no adverse events                 | Y = 0 tally | N = 0 tally      |                                                                                                                                                                                                                                                      |

| Reference                       | Reference number | Extracted Text                                                                                                                                                                                                                                                                                                                                                                                                                                                                      | AEs related to TENS                                 | Statement   | Extractable Data | Comment                                                                                                            |
|---------------------------------|------------------|-------------------------------------------------------------------------------------------------------------------------------------------------------------------------------------------------------------------------------------------------------------------------------------------------------------------------------------------------------------------------------------------------------------------------------------------------------------------------------------|-----------------------------------------------------|-------------|------------------|--------------------------------------------------------------------------------------------------------------------|
| (Linde et al., 1995)            | <sup>209</sup>   | The most common side effect during TENS treatment is some type of hypersensitivity reaction of the skin. It was mostly seen in slightly underweight patients, in whom contact between skin and electrode was not at its maximum, especially in the area of the TMJ                                                                                                                                                                                                                  | Skin reaction (no other details)                    | Y           | N                | No numerical data                                                                                                  |
| (Linn et al., 1999)             | <sup>210</sup>   | No statements present                                                                                                                                                                                                                                                                                                                                                                                                                                                               | No information to extract                           | N           | N                |                                                                                                                    |
| (Lison et al., 2017)            | <sup>211</sup>   | No patients in either the active or placebo TENS groups reported adverse events such as skin allergy, pain, or burning at the electrode site.                                                                                                                                                                                                                                                                                                                                       | Reported no adverse events                          | Y = 0 tally | N = 0 tally      |                                                                                                                    |
| (Liu et al., 1985)              | <sup>212</sup>   | No statements present                                                                                                                                                                                                                                                                                                                                                                                                                                                               | No information to extract                           | N           | N                |                                                                                                                    |
| (Liu et al., 2017)              | <sup>213</sup>   | During treatment, only 1 patient in the 2-Hz tONS group reported an adverse event. This was intolerance to a form of pinch pain induced by electrical stimulation. However, when the intensity of stimulation was reduced from 10 to 9 mA, the uncomfortable feeling subsided. In the TPM group, 9 of 22 patients experienced (mostly mild) paresthesia, especially of the hands and feet. No other adverse events were reported. tONS = transcutaneous occipital nerve stimulation | Pain at 10mA. Pain lessened when intensity reduced. | Y           | Y                | Data extracted<br>TENS = 1 event / 22 - Pinch pain<br>Topiramate = 9 / 22 - Mild paraesthesia of hands             |
| (Lofgren and Norrbrink, 2009)   | <sup>214</sup>   | In this study few side-effects were reported. Three patients reported increased pain, 2 after TENS and one after warmth.                                                                                                                                                                                                                                                                                                                                                            | Increased pain in 2 patients                        | Y           | Y                | Data extracted (increased pain)<br>TENS = 2 events / 32 participants<br>Warmth therapy = 1 event / 32 participants |
| (Luchesa et al., 2009)          | <sup>215</sup>   | No statements present                                                                                                                                                                                                                                                                                                                                                                                                                                                               | No information to extract                           | N           | N                |                                                                                                                    |
| (Lundeberg, 1984)               | <sup>216</sup>   | No statements present                                                                                                                                                                                                                                                                                                                                                                                                                                                               | No information to extract                           | N           | N                |                                                                                                                    |
| (Lundeberg et al., 1985)        | <sup>217</sup>   | No statements present                                                                                                                                                                                                                                                                                                                                                                                                                                                               | No information to extract                           | N           | N                |                                                                                                                    |
| (Machado et al., 2019)          | <sup>218</sup>   | No statements present                                                                                                                                                                                                                                                                                                                                                                                                                                                               | No information to extract                           | N           | N                |                                                                                                                    |
| (Machin et al., 1988)           | <sup>219</sup>   | No statements present                                                                                                                                                                                                                                                                                                                                                                                                                                                               | No information to extract                           | N           | N                |                                                                                                                    |
| (Mahure et al., 2017)           | <sup>220</sup>   | No TENS machine-related complication, such as localized pain or erythema at the electrode site, occurred in either group of patients.                                                                                                                                                                                                                                                                                                                                               | Reported no adverse events                          | Y           | N = 0 Tally      | No numerical data despite clear statement of no events in both groups                                              |
| (Manigandan et al., 2014)       | <sup>221</sup>   | No statements present                                                                                                                                                                                                                                                                                                                                                                                                                                                               | No information to extract                           | N           | N                |                                                                                                                    |
| (Mannheimer and Carlsson, 1979) | <sup>222</sup>   | No side effects were observed.                                                                                                                                                                                                                                                                                                                                                                                                                                                      | Reported no adverse events                          | Y = 0 tally | N = 0 tally      |                                                                                                                    |
| (Mannheimer and Whalen, 1985)   | <sup>223</sup>   | No statements present                                                                                                                                                                                                                                                                                                                                                                                                                                                               | No information to extract                           | N           | N                |                                                                                                                    |
| (Mannheimer et al., 1978)       | <sup>224</sup>   | No side effects of the treatment were observed. One patient reported that when the pain recurred it was more severe than before TNS, however.                                                                                                                                                                                                                                                                                                                                       | Pain recurred more severe than before TNS           | Y           | N                |                                                                                                                    |
| (Mannheimer et al., 1985)       | <sup>225</sup>   | One patient in the treatment group was excluded because of skin irritation from the electrodes....                                                                                                                                                                                                                                                                                                                                                                                  | Skin irritation                                     | Y           | N                |                                                                                                                    |
| (Mansourian et al., 2019)       | <sup>226</sup>   | No statements present                                                                                                                                                                                                                                                                                                                                                                                                                                                               | No information to extract                           | N           | N                |                                                                                                                    |
| (Mansuri et al., 2019)          | <sup>227</sup>   | No statements present                                                                                                                                                                                                                                                                                                                                                                                                                                                               | No information to extract                           | N           | N                |                                                                                                                    |
| (Mansuri et al., 2020)          | <sup>228</sup>   | No statements present                                                                                                                                                                                                                                                                                                                                                                                                                                                               | No information to extract                           | N           | N                |                                                                                                                    |
| (Marchand et al., 1993)         | <sup>229</sup>   | No statements present                                                                                                                                                                                                                                                                                                                                                                                                                                                               | No information to extract                           | N           | N                |                                                                                                                    |

| Reference                 | Reference number | Extracted Text                                                                                                                                                                                                                                                                                                                                                                                                                                                                                                                                                                                                                                                                                                            | AEs related to TENS                           | Statement   | Extractable Data | Comment                                                                                                                                                             |
|---------------------------|------------------|---------------------------------------------------------------------------------------------------------------------------------------------------------------------------------------------------------------------------------------------------------------------------------------------------------------------------------------------------------------------------------------------------------------------------------------------------------------------------------------------------------------------------------------------------------------------------------------------------------------------------------------------------------------------------------------------------------------------------|-----------------------------------------------|-------------|------------------|---------------------------------------------------------------------------------------------------------------------------------------------------------------------|
| (Mascarin et al., 2012)   | <sup>230</sup>   | No statements present                                                                                                                                                                                                                                                                                                                                                                                                                                                                                                                                                                                                                                                                                                     | No information to extract                     | N           | N                |                                                                                                                                                                     |
| (McCallum et al., 1988)   | <sup>231</sup>   | No statements present                                                                                                                                                                                                                                                                                                                                                                                                                                                                                                                                                                                                                                                                                                     | No information to extract                     | N           | N                |                                                                                                                                                                     |
| (Melzack et al., 1983)    | <sup>232</sup>   | No statements present                                                                                                                                                                                                                                                                                                                                                                                                                                                                                                                                                                                                                                                                                                     | No information to extract                     | N           | N                |                                                                                                                                                                     |
| (Merrill, 1989)           | <sup>233</sup>   | No statements present                                                                                                                                                                                                                                                                                                                                                                                                                                                                                                                                                                                                                                                                                                     | No information to extract                     | N           | N                |                                                                                                                                                                     |
| (Miller et al., 2007)     | <sup>234</sup>   | No statements present                                                                                                                                                                                                                                                                                                                                                                                                                                                                                                                                                                                                                                                                                                     | No information to extract                     | N           | N                |                                                                                                                                                                     |
| (Milsom et al., 1994)     | <sup>235</sup>   | Ten of the 12 women considered the high-intensity transcutaneous nerve stimulation to be painful. However, stimulation lasted only a few seconds, and all the women were prepared to accept again this short period of pain to obtain pain relief from dysmenorrhea.                                                                                                                                                                                                                                                                                                                                                                                                                                                      | Painful at high-intensity stimulation         | Y           | N                |                                                                                                                                                                     |
| (Moharic et al., 2009)    | <sup>236</sup>   | As already indicated in the Methods section, three patients in the pregabalin group experienced such severe somnolence and dizziness that they had to withdraw from the study. Complaints in the combined group beside somnolence and dizziness included peripheral oedema, weight gain, elevated blood glucose values and withdrawal headache, while one patient from the combined group withdrew from the study because of a traffic accident (tractor overturning) caused by somnolence induced (with all likelihood) by pregabalin. In the TENS group, none of the patients reported any local or systemic side effects, neither did they report any problems with continuous TENS application for three hours daily. | Reported no adverse events                    | Y           | Y                | Data extracted (severe somnolence and dizziness)<br>TENS = 0 events / 46 participants<br>Pregabalin alone = 3 events / 8 participants resulting in study withdrawal |
| (Mondal et al., 2019)     | <sup>237</sup>   | No statements present                                                                                                                                                                                                                                                                                                                                                                                                                                                                                                                                                                                                                                                                                                     | No information to extract                     | N           | N                |                                                                                                                                                                     |
| (Moore and Shurman, 1997) | <sup>238</sup>   | No adverse treatment effects were reported and no subject reported the addition of any new pain medication, physical therapy, or other pain-related treatment during the course of their study participation.                                                                                                                                                                                                                                                                                                                                                                                                                                                                                                             | Reported no adverse events                    | Y = 0 tally | N = 0 tally      |                                                                                                                                                                     |
| (Mora et al., 2006)       | <sup>239</sup>   | We can recommend this technique due to its simple use and the lack of side effects in our study population.                                                                                                                                                                                                                                                                                                                                                                                                                                                                                                                                                                                                               | Reported no adverse events                    | Y = 0 tally | N = 0 TENS ONLY  |                                                                                                                                                                     |
| (Morgan et al., 1996)     | <sup>240</sup>   | No statements present                                                                                                                                                                                                                                                                                                                                                                                                                                                                                                                                                                                                                                                                                                     | No information to extract                     | N           | N                |                                                                                                                                                                     |
| (Møystad et al., 1990)    | <sup>241</sup>   | No statements present. TNS may have advantages as a non-invasive method with few side effects that is simple to administer for the patients themselves.                                                                                                                                                                                                                                                                                                                                                                                                                                                                                                                                                                   | No information to extract                     | N           | N                |                                                                                                                                                                     |
| (Murray et al., 2004)     | <sup>242</sup>   | No statements present                                                                                                                                                                                                                                                                                                                                                                                                                                                                                                                                                                                                                                                                                                     | No information to extract                     | N           | N                |                                                                                                                                                                     |
| (Mutlu et al., 2013)      | <sup>243</sup>   | No statements present                                                                                                                                                                                                                                                                                                                                                                                                                                                                                                                                                                                                                                                                                                     | No information to extract                     | N           | N                | There were dropouts to follow-up but no explanation for these.                                                                                                      |
| (Nabi et al., 2015)       | <sup>244</sup>   | The therapeutic methods studied here were well tolerated were not associated with any serious adverse effects. However, skin irritation was reported in a few TENS group subjects.                                                                                                                                                                                                                                                                                                                                                                                                                                                                                                                                        | Skin irritation                               | Y           | N                | No numerical data                                                                                                                                                   |
| (Nash et al., 1990)       | <sup>245</sup>   | The only side effected noted in the series were occasional skin rashes due to allergy to the electrode jelly or fixing tape, and occasional patients had transient increase in pain which settled to previous levels with cessation of treatment.                                                                                                                                                                                                                                                                                                                                                                                                                                                                         | Skin irritation<br>Transient increase in pain | Y           | N                | No numerical data                                                                                                                                                   |



| Reference                                                                                             | Reference number                        | Extracted Text                                                                                                                                                                                                                                                                                                                                                                                                                                                                                                                                                                                 | AEs related to TENS                                                                 | Statement   | Extractable Data | Comment                                                                            |
|-------------------------------------------------------------------------------------------------------|-----------------------------------------|------------------------------------------------------------------------------------------------------------------------------------------------------------------------------------------------------------------------------------------------------------------------------------------------------------------------------------------------------------------------------------------------------------------------------------------------------------------------------------------------------------------------------------------------------------------------------------------------|-------------------------------------------------------------------------------------|-------------|------------------|------------------------------------------------------------------------------------|
| (Navarathnam et al., 1984)                                                                            | <sup>246</sup>                          | Some of the patients in both groups developed blisters around the electrode edges in the distribution of the adhesives. In addition, two patients developed small areas of pressure necrosis in the region of the lumbosacral electrodes which might be avoided by more attention to posture of the patients with these electrodes.                                                                                                                                                                                                                                                            | Skin irritation<br>Lumbosacral pressure necrosis                                    | Y           | N                | No numerical data                                                                  |
| (Neary, 1981)                                                                                         | <sup>247</sup>                          | No cases of infection or skin reaction were observed. TENS did not mask the pain symptoms from complications.                                                                                                                                                                                                                                                                                                                                                                                                                                                                                  | Reported no adverse events                                                          | Y = 0 tally | N = 0 tally      |                                                                                    |
| (Neighbours et al., 1987)                                                                             | <sup>248</sup>                          | No statements present                                                                                                                                                                                                                                                                                                                                                                                                                                                                                                                                                                          | No information to extract                                                           | N           | N                |                                                                                    |
| (Nesheim, 1981)                                                                                       | <sup>249</sup>                          | No statements present                                                                                                                                                                                                                                                                                                                                                                                                                                                                                                                                                                          | No information to extract                                                           | N           | N                |                                                                                    |
| (Neumark et al., 1978)                                                                                | <sup>250</sup>                          | No statements present                                                                                                                                                                                                                                                                                                                                                                                                                                                                                                                                                                          | No information to extract                                                           | N           | N                |                                                                                    |
| (Ng et al., 2003)                                                                                     | <sup>251</sup>                          | No statements present                                                                                                                                                                                                                                                                                                                                                                                                                                                                                                                                                                          | No information to extract                                                           | N           | N                |                                                                                    |
| (Nordemar and Thorner, 1981)                                                                          | <sup>252</sup>                          | No statements present                                                                                                                                                                                                                                                                                                                                                                                                                                                                                                                                                                          | No information to extract                                                           | N           | N                |                                                                                    |
| (Norrbrink, 2009)                                                                                     | <sup>253</sup>                          | Three patients experienced discomfort or increased pain during treatment, and one patient experienced local muscle spasms.                                                                                                                                                                                                                                                                                                                                                                                                                                                                     | Increased pain during treatment<br>Local muscle spasms                              | Y           | N                | No numerical data<br>Unclear which group experienced side effects                  |
| (Olsén et al., 2007)                                                                                  | <sup>254</sup>                          | No adverse effects except for discomfort during stimulation were recorded. Discomfort from the stimulation itself was greater in the HI TENS group than in the LI TENS group (pB/0.01). In the HI TENS group, two women experienced severe discomfort, two women experienced moderate discomfort, five women experienced mild discomfort, and two women experienced no discomfort. Seven women in the LI TENS group experienced no discomfort and one woman experienced mild discomfort from the stimulation given. No adverse effects except for discomfort during stimulation were recorded. | Discomfort during stimulation                                                       | Y           | N                | No numerical data other than stimulation discomfort<br>Decided not to extract this |
| (Fagevik Olsen et al., 2019)                                                                          | <sup>255</sup>                          | No statements present                                                                                                                                                                                                                                                                                                                                                                                                                                                                                                                                                                          | No information to extract                                                           | N           | N                | Dropouts recorded but reasons not given                                            |
| (Oncel et al., 2002)                                                                                  | <sup>256</sup>                          | No complications due to TENS therapy or Naproxen sodium were seen during the study.                                                                                                                                                                                                                                                                                                                                                                                                                                                                                                            | Reported no adverse events                                                          | Y = 0 tally | N = 0 tally      |                                                                                    |
| (Oosterhof et al., 2006)                                                                              | <sup>257</sup>                          | No statements present in <sup>257</sup> .<br>No statements present in secondary report <sup>259</sup>                                                                                                                                                                                                                                                                                                                                                                                                                                                                                          | Skin irritation                                                                     | Y           | N                | No numerical data                                                                  |
| Secondary reports<br>(Oosterhof et al., 2008,<br>Oosterhof et al., 2012a,<br>Oosterhof et al., 2012b) | Secondary reports<br><sup>258-260</sup> | Secondary report - <sup>260</sup><br>Skin irritation occurred at some time point in half of the patients but could easily be cured by changing the type of electrode, except for 4 patients who had to stop treatment. Because there was no difference between TENS and sham TENS, we assume there was no interaction of the electric current with electrode material, which has been suggested.                                                                                                                                                                                               |                                                                                     |             |                  |                                                                                    |
| (Ordog, 1987)                                                                                         | <sup>261</sup>                          | No complications of treatment were found. No side effects were reported, except a mild tingling sensation at higher TENS-PAC® output levels.                                                                                                                                                                                                                                                                                                                                                                                                                                                   | Reported no adverse events<br>Mild tingling sensation is part of the TENS treatment | Y = 0 tally | N = 0 TENS ONLY  |                                                                                    |

| Reference                                                                | Reference number                                     | Extracted Text                                                                                                                                                                                                                                                                                                                                    | AEs related to TENS                      | Statement   | Extractable Data | Comment                                                                                         |
|--------------------------------------------------------------------------|------------------------------------------------------|---------------------------------------------------------------------------------------------------------------------------------------------------------------------------------------------------------------------------------------------------------------------------------------------------------------------------------------------------|------------------------------------------|-------------|------------------|-------------------------------------------------------------------------------------------------|
|                                                                          |                                                      | Overall, 20% of the patients reported this effect, but none had to discontinue usage of the TENS-PAC® because of it.                                                                                                                                                                                                                              |                                          |             |                  |                                                                                                 |
| (Ozkaraoglu et al., 2020)                                                | <sup>262</sup>                                       | No statements present                                                                                                                                                                                                                                                                                                                             | No information to extract                | N           | N                |                                                                                                 |
| (Ozkul et al., 2015)                                                     | <sup>263</sup>                                       | No unwanted effects occurred during the application of both treatments.                                                                                                                                                                                                                                                                           | Reported no adverse events               | Y = 0 tally | N = 0 tally      |                                                                                                 |
| (Oztas and Iyigun, 2019)                                                 | <sup>264</sup>                                       | No statements present                                                                                                                                                                                                                                                                                                                             | No information to extract                | N           | N                |                                                                                                 |
| (Ozturk et al., 2016)                                                    | <sup>265</sup>                                       | No statements present                                                                                                                                                                                                                                                                                                                             | No information to extract                | N           | N                |                                                                                                 |
| (Padma et al., 2000)                                                     | <sup>266</sup>                                       | In the present study, no side effects were noted, and the stimulation was acceptable to all the patients, but the willingness to accept TENS as a mode of relief was equivocal.                                                                                                                                                                   | Reported no adverse events               | Y = 0 tally | N = 0 TENS ONLY  |                                                                                                 |
| (Paker et al., 2006)                                                     | <sup>267</sup>                                       | In the present study, no serious adverse effects were reported in the intra-articular hyaluron group or in the TENS group.                                                                                                                                                                                                                        | Reported no adverse events               | Y           | N = 0 Tally      | One dropout due to worsening pain – not attributable to treatment                               |
| (Palmer et al., 2014)                                                    | <sup>268</sup>                                       | No statements present                                                                                                                                                                                                                                                                                                                             | No information to extract                | N           | N                |                                                                                                 |
| (Pan et al., 2003)                                                       | <sup>269</sup>                                       | Five patients complained of soreness in the upper arm after ESWT, but this soreness had subsided before their next visit. One patient had cardiac palpitations during the first ESWT session as a result of anxiety but was calm after taking a break. Otherwise, no specific side effect (e.g., hematoma, paresthesia) occurred in either group. | No adverse events recorded in TENS group | Y           | Y                | Extractable data: (soreness) TENS = 0 events /30 participants ESWT = 5 events / 33 participants |
| (Park et al., 2015)                                                      | <sup>270</sup>                                       | No adverse reactions related to TENS were observed.                                                                                                                                                                                                                                                                                               | Reported no adverse events               | Y           | N = 0 TENS ONLY  | No numerical data                                                                               |
| (Patil and Aileni, 2017)                                                 | <sup>271</sup>                                       | No statements present                                                                                                                                                                                                                                                                                                                             | No information to extract                | N           | N                |                                                                                                 |
| (Peacock et al., 2019)                                                   | <sup>272</sup>                                       | ... and no adverse events were reported in relation to the administration of the Biomodulator, traditional Chinese acupuncture, or TENS device in the study.                                                                                                                                                                                      | Reported no adverse events               | Y = 0 tally | N = 0 tally      | No numerical data                                                                               |
| (Pietrosimone et al., 2009)                                              | <sup>273</sup>                                       | No statements present                                                                                                                                                                                                                                                                                                                             | No information to extract                | N           | N                |                                                                                                 |
| (Pietrosimone et al., 2011) Secondary Report (Pietrosimone et al., 2010) | <sup>274</sup><br>Secondary Report<br><sup>275</sup> | No adverse events were reported to the study personnel regarding TENS or placebo usage.                                                                                                                                                                                                                                                           | Reported no adverse events               | Y = 0 tally | N = 0 tally      |                                                                                                 |
| (Pietrosimone et al., 2020)                                              | <sup>276</sup>                                       | No statements present                                                                                                                                                                                                                                                                                                                             | No information to extract                | N           | N                |                                                                                                 |
| (Pike, 1978)                                                             | <sup>277</sup>                                       | The duration of stimulation, whether intermittent or continuous, is unimportant since neither tachyphylaxis nor side-effects occurred.                                                                                                                                                                                                            | Reported no adverse events               | Y           | N = 0 TENS ONLY  | No numerical data                                                                               |
| (Pitangui et al., 2012)                                                  | <sup>278</sup>                                       | No reports of side effects or dissatisfaction were made, supporting the results of other studies.                                                                                                                                                                                                                                                 | Reported no adverse events               | Y = 0 tally | N = 0 tally      |                                                                                                 |

| Reference                      | Reference number | Extracted Text                                                                                                                                                                                                                                                                                                                                                                                                                                                                                                                    | AEs related to TENS                           | Statement   | Extractable Data | Comment                                                                                     |
|--------------------------------|------------------|-----------------------------------------------------------------------------------------------------------------------------------------------------------------------------------------------------------------------------------------------------------------------------------------------------------------------------------------------------------------------------------------------------------------------------------------------------------------------------------------------------------------------------------|-----------------------------------------------|-------------|------------------|---------------------------------------------------------------------------------------------|
| (Pitangui et al., 2014)        | <sup>279</sup>   | HFT and LFT are safe and effective resources without side effects and presenting good acceptance.....                                                                                                                                                                                                                                                                                                                                                                                                                             | Reported no adverse events                    | Y = 0 tally | N = 0 tally      |                                                                                             |
| (Platon et al., 2010)          | <sup>280</sup>   | The only reported side effect of TENS during the study was discomfort during 1 min of the initial stimulation, which was noticed in some patients.                                                                                                                                                                                                                                                                                                                                                                                | Slight discomfort during stimulation          | Y           | N                | No numerical data                                                                           |
| (Platon et al., 2018)          | <sup>281</sup>   | Some patients reported an uncomfortable stimulation during the 1 min of the initial stimulation with TENS as a side effect.                                                                                                                                                                                                                                                                                                                                                                                                       | Slight discomfort during stimulation          | Y           | N                | No numerical data                                                                           |
| (Prabhakar and Ramteke, 2011)  | <sup>282</sup>   | No statements present                                                                                                                                                                                                                                                                                                                                                                                                                                                                                                             | No information to extract                     | N           | N                |                                                                                             |
| (Presser et al., 2000)         | <sup>283</sup>   | No statements present                                                                                                                                                                                                                                                                                                                                                                                                                                                                                                             | No information to extract                     | N           | N                |                                                                                             |
| (Rainov et al., 1994)          | <sup>284</sup>   | No statements present                                                                                                                                                                                                                                                                                                                                                                                                                                                                                                             | No information to extract                     | N           | N                |                                                                                             |
| (Rajfur et al., 2017)          | <sup>285</sup>   | No statements present                                                                                                                                                                                                                                                                                                                                                                                                                                                                                                             | No information to extract                     | N           | N                |                                                                                             |
| (Rajpurohit et al., 2010)      | <sup>286</sup>   | No statements present                                                                                                                                                                                                                                                                                                                                                                                                                                                                                                             | No information to extract                     | N           | N                |                                                                                             |
| (Rakel and Frantz, 2003)       | <sup>287</sup>   | No statements present                                                                                                                                                                                                                                                                                                                                                                                                                                                                                                             | No information to extract                     | N           | N                |                                                                                             |
| (Rakel et al., 2014)           | <sup>288</sup>   | No statements present                                                                                                                                                                                                                                                                                                                                                                                                                                                                                                             | No information to extract                     | N           | N                |                                                                                             |
| (Ramanathan et al., 2017)      | <sup>289</sup>   | Consort identifies lost to follow due to AE in TENS and placebo group – but numerical data not clear<br>Of note, 11 patients (9.48%) reported popular rash and/or cutaneous blistering around the placement site of adhesive electrodes.....<br>Two patients were withdrawn for persistent cutaneous blistering.<br>Other reasons for withdrawal were ... and skin hypersensitivity to adhesive electrodes (n=3, 6.81%)<br>Authors note that withdrawals due to 'device-related discomfort' were in the active group (n=3 6.81%). | Skin irritation/blistering at electrode sites | Y           | N                | No data extracted because no clear numerical data between the different intervention groups |
| (Ramos et al., 2018)           | <sup>290</sup>   | No statements present                                                                                                                                                                                                                                                                                                                                                                                                                                                                                                             | No information to extract                     | N           | N                |                                                                                             |
| (Rani et al., 2020)            | <sup>291</sup>   | No statements present                                                                                                                                                                                                                                                                                                                                                                                                                                                                                                             | No information to extract                     | N           | N                |                                                                                             |
| (Ratajczak et al., 2011)       | <sup>292</sup>   | No statements present                                                                                                                                                                                                                                                                                                                                                                                                                                                                                                             | No information to extract                     | N           | N                |                                                                                             |
| (Rawat et al., 1991)           | <sup>293</sup>   | No statements present                                                                                                                                                                                                                                                                                                                                                                                                                                                                                                             | No information to extract                     | N           | N                |                                                                                             |
| (Renovato França et al., 2019) | <sup>294</sup>   | No adverse events were observed in this study.                                                                                                                                                                                                                                                                                                                                                                                                                                                                                    | Reported no adverse events                    | Y = 0 tally | N = 0 tally      |                                                                                             |
| (Reuss et al., 1988)           | <sup>295</sup>   | No statements present                                                                                                                                                                                                                                                                                                                                                                                                                                                                                                             | No information to extract                     | N           | N                |                                                                                             |
| (Revadkar and Bhojwani, 2019)  | <sup>296</sup>   | No statements present                                                                                                                                                                                                                                                                                                                                                                                                                                                                                                             | No information to extract                     | N           | N                |                                                                                             |
| (Ringel and Taubert, 1991)     | <sup>297</sup>   | No statements present                                                                                                                                                                                                                                                                                                                                                                                                                                                                                                             | No information to extract                     | N           | N                |                                                                                             |
| (Robb et al., 2007)            | <sup>298</sup>   | No statements present                                                                                                                                                                                                                                                                                                                                                                                                                                                                                                             | No information to extract                     | N           | N                |                                                                                             |
| (Robinson et al., 2001)        | <sup>299</sup>   | No statements present                                                                                                                                                                                                                                                                                                                                                                                                                                                                                                             | No information to extract                     | N           | N                |                                                                                             |
| (Roche et al., 1985)           | <sup>300</sup>   | No statements present                                                                                                                                                                                                                                                                                                                                                                                                                                                                                                             | No information to extract                     | N           | N                |                                                                                             |
| (Rooney et al., 1983)          | <sup>301</sup>   | No statements present. Authors state that TENS is 'safe' in the conclusion. No further info.                                                                                                                                                                                                                                                                                                                                                                                                                                      | No information to extract                     | N           | N                |                                                                                             |
| (Rosenberg et al., 1978)       | <sup>302</sup>   | No complications were observed in this study from the use of TENS and the only morbidity reported has involved skin reactions at the electrode sites                                                                                                                                                                                                                                                                                                                                                                              | Skin reaction at electrode sites              | Y           | N                | No numerical data                                                                           |
| (Rutgers et al., 1988)         | <sup>303</sup>   | No statements present                                                                                                                                                                                                                                                                                                                                                                                                                                                                                                             | No information to extract                     | N           | N                |                                                                                             |

| Reference                       | Reference number | Extracted Text                                                                                                                                                                                                                                                                                                                                                                                                                                                                                                                                                                                                               | AEs related to TENS                                                                              | Statement   | Extractable Data | Comment                                                                                                                                                                                                                                                                                                                                                        |
|---------------------------------|------------------|------------------------------------------------------------------------------------------------------------------------------------------------------------------------------------------------------------------------------------------------------------------------------------------------------------------------------------------------------------------------------------------------------------------------------------------------------------------------------------------------------------------------------------------------------------------------------------------------------------------------------|--------------------------------------------------------------------------------------------------|-------------|------------------|----------------------------------------------------------------------------------------------------------------------------------------------------------------------------------------------------------------------------------------------------------------------------------------------------------------------------------------------------------------|
| (Sadala et al., 2018)           | <sup>304</sup>   | No statements present                                                                                                                                                                                                                                                                                                                                                                                                                                                                                                                                                                                                        | No information to extract                                                                        | N           | N                |                                                                                                                                                                                                                                                                                                                                                                |
| (Sahin et al., 2011)            | <sup>305</sup>   | No statements present                                                                                                                                                                                                                                                                                                                                                                                                                                                                                                                                                                                                        | No information to extract                                                                        | N           | N                |                                                                                                                                                                                                                                                                                                                                                                |
| (Samadzadeh et al., 2017)       | <sup>306</sup>   | No statements present                                                                                                                                                                                                                                                                                                                                                                                                                                                                                                                                                                                                        | No information to extract                                                                        | N           | N                | States in conclusion that TENS is safe but no info on adverse events in main text.                                                                                                                                                                                                                                                                             |
| (Sangtong et al., 2019)         | <sup>307</sup>   | Table 3 shows adverse events, patient global assessment, and patient satisfaction after treatment. More subjects in the study group had increased knee swelling than subjects in the control group (four patients (6.3%) vs. two patients (2.9%), respectively), but no significant difference ( $P = 0.430$ ). Table 3 of their report                                                                                                                                                                                                                                                                                      | Joint swelling<br>Rash                                                                           | Y           | Y                | Data extracted (joint swelling and skin rash)<br>TENS + US = 4 events / 64 participants<br>US alone = 3 events / 68 participants                                                                                                                                                                                                                               |
| (Santamato et al., 2013)        | <sup>308</sup>   | None of the patients reported adverse effects during the study period.                                                                                                                                                                                                                                                                                                                                                                                                                                                                                                                                                       | Reported no adverse events                                                                       | Y = 0 tally | N = 0 tally      |                                                                                                                                                                                                                                                                                                                                                                |
| (Santana et al., 2016)          | <sup>309</sup>   | No statements present                                                                                                                                                                                                                                                                                                                                                                                                                                                                                                                                                                                                        | No information to extract                                                                        | N           | N                |                                                                                                                                                                                                                                                                                                                                                                |
| (Saranya et al., 2019)          | <sup>310</sup>   | No statements present                                                                                                                                                                                                                                                                                                                                                                                                                                                                                                                                                                                                        | No information to extract                                                                        | N           | N                |                                                                                                                                                                                                                                                                                                                                                                |
| (Sayilir and Yildizgoren, 2017) | <sup>311</sup>   | No statements present                                                                                                                                                                                                                                                                                                                                                                                                                                                                                                                                                                                                        | No information to extract                                                                        | N           | N                |                                                                                                                                                                                                                                                                                                                                                                |
| (Seo et al., 2013)              | <sup>312</sup>   | A total of 7 adverse events that required admission in 6 participants were reported during the study. The adverse events included a traffic accident, acute appendicitis, cellulitis, worsening of lower back pain, shoulder pain, uterine myoma, and spontaneous abortion. There was a possible relationship between the treatment and spontaneous abortion ... that occurred 21 days after BTX-A injection and electrical stimulation. She answered "no" to the question "Are you pregnant or do you have a plan for pregnancy?" before study enrolment. The other events were not related to the treatment in this study. | Spontaneous abortion possibly related to treatment. Other adverse events unrelated to treatment. | Y           | N                | Numerical data not necessarily related to TENS/intervention                                                                                                                                                                                                                                                                                                    |
| (Serry et al., 2016)            | <sup>313</sup>   | No statements present                                                                                                                                                                                                                                                                                                                                                                                                                                                                                                                                                                                                        | No information to extract                                                                        | N           | N                |                                                                                                                                                                                                                                                                                                                                                                |
| (Sezen et al., 2017)            | <sup>314</sup>   | We observed a small number of complications in the patients who were administered TENS in our study, but there was no statistically significant difference between the two groups. Table 4 of their report                                                                                                                                                                                                                                                                                                                                                                                                                   | Authors do not say whether complications were felt to be due to TENS                             | Y           | N                | Data related to post-operative complications. Debatably this is related to AE associated with op procedures rather than TENS.<br>We decided not to extract this data because AE from operation reflects efficacy of TENS rather than AE of TENS<br><br>Not extracted data (complications)<br>TENS (T) = 6 events / 43<br>Control placebo TENS = 10 events / 44 |

| Reference                     | Reference number | Extracted Text                                                                                                                                                                                                                                                                                                                                                                                                                                                                                                                                                                                                                                                                                                                                                                                                                                        | AEs related to TENS                                 | Statement   | Extractable Data | Comment                                                                                                                               |
|-------------------------------|------------------|-------------------------------------------------------------------------------------------------------------------------------------------------------------------------------------------------------------------------------------------------------------------------------------------------------------------------------------------------------------------------------------------------------------------------------------------------------------------------------------------------------------------------------------------------------------------------------------------------------------------------------------------------------------------------------------------------------------------------------------------------------------------------------------------------------------------------------------------------------|-----------------------------------------------------|-------------|------------------|---------------------------------------------------------------------------------------------------------------------------------------|
|                               |                  |                                                                                                                                                                                                                                                                                                                                                                                                                                                                                                                                                                                                                                                                                                                                                                                                                                                       |                                                     |             |                  | Not definitely attributed to the intervention                                                                                         |
| (Shahoei et al., 2017)        | <sup>315</sup>   | No statements present<br>... Since it has no negative consequences for mothers and their fetus, it is considered a safe pain relief method.                                                                                                                                                                                                                                                                                                                                                                                                                                                                                                                                                                                                                                                                                                           | No information to extract                           | N           | N                |                                                                                                                                       |
| (Shehab and Adham, 2000)      | <sup>316</sup>   | No statements present                                                                                                                                                                                                                                                                                                                                                                                                                                                                                                                                                                                                                                                                                                                                                                                                                                 | No information to extract                           | N           | N                |                                                                                                                                       |
| (Sherry et al., 2001)         | <sup>317</sup>   | No statements present                                                                                                                                                                                                                                                                                                                                                                                                                                                                                                                                                                                                                                                                                                                                                                                                                                 | No information to extract                           | N           | N                |                                                                                                                                       |
| (Shimoji et al., 2007)        | <sup>318</sup>   | There were three cases of skin flash at sites of electrode placement in subjects treated with TENS using CPWs, but these disappeared within a day without intervention. No such skin irritation occurred in subjects who received TENS using BMWs. No other complications were reported in both groups.<br>There was also a sham TENS group but no mention of AEs/complications                                                                                                                                                                                                                                                                                                                                                                                                                                                                       | 'Skin flash' (3 cases) in CPW group                 | Y           | Y                | Data extracted (skin irritation) TENS (CPWs) = 3 / 9<br>BMWs (bidirectional modulated sine waves) = 0 events / 11                     |
| (Shimoura et al., 2019)       | <sup>319</sup>   | No adverse effect was noted with the TENS or sham-TENS treatment.                                                                                                                                                                                                                                                                                                                                                                                                                                                                                                                                                                                                                                                                                                                                                                                     | Reported no adverse events                          | Y = 0 tally | N = 0 tally      |                                                                                                                                       |
| (Shoukry and Al-Ansary, 2019) | <sup>320</sup>   | Adverse effect during or after the procedure was recorded and treated. Table 3 shows that adverse effects [were significantly less frequent among group-A [TENS + i.v. fentanyl] compared to group-B [i.v. fentanyl]. These statements relate to adverse effects associated with ESWT procedure rather than TENS                                                                                                                                                                                                                                                                                                                                                                                                                                                                                                                                      | O2 desaturation<br>Nausea and vomiting<br>Dizziness | N           |                  | The data provides information about effect of TENS on incidence of adverse events associated with ESWT procedure + fentanyl treatment |
| (Siemens et al., 2020)        | <sup>321</sup>   | Two patients experienced an uncomfortable feeling caused by the current, one after IMT and one after PBT<br><br>One out of 20 (5%) patients perceived the electric current as uncomfortable after the IMT phase and 1/20 (5%) after the PBT phase. No other TENS-related adverse events were reported. Four patients (20%) generally criticized that cables were impractical and one (5%) patient felt disturbed by the electrodes. After testing both TENS modes, 7/20 (35%) patients requested a prescription for the TENS device in order to use TENS after discharge.<br><br>A usability problem rather than a safety problem was the fact that the main reason for stopping the study after period 2 was the burden in using TENS (5/15, 33%), e.g., because of the disturbing cables of the device (see Online Resource 5 for further reasons). |                                                     | N           | N                | Frequency data between placebo and TENS interventions not provided                                                                    |
| (Sikiru et al., 2008)         | <sup>322</sup>   | The results demonstrated a significant decrease in the NIH-CPSI (P = 0.0002) with no urethral, anal complaints or other side effects                                                                                                                                                                                                                                                                                                                                                                                                                                                                                                                                                                                                                                                                                                                  | Reported no adverse events                          | Y = 0 tally | N = 0 tally      |                                                                                                                                       |
| (Silva et al., 2012)          | <sup>323</sup>   | No statements present                                                                                                                                                                                                                                                                                                                                                                                                                                                                                                                                                                                                                                                                                                                                                                                                                                 | No information to extract                           | N           | N                |                                                                                                                                       |
| (Silva et al., 2014)          | <sup>324</sup>   | No statements present                                                                                                                                                                                                                                                                                                                                                                                                                                                                                                                                                                                                                                                                                                                                                                                                                                 | No information to extract                           | N           | N                |                                                                                                                                       |
| (Sim, 1991)                   | <sup>325</sup>   | No statements present                                                                                                                                                                                                                                                                                                                                                                                                                                                                                                                                                                                                                                                                                                                                                                                                                                 | No information to extract                           | N           | N                |                                                                                                                                       |
| (Siqueira et al., 2019)       | <sup>326</sup>   | No statements present                                                                                                                                                                                                                                                                                                                                                                                                                                                                                                                                                                                                                                                                                                                                                                                                                                 | No information to extract                           | N           | N                |                                                                                                                                       |
| (Sloan et al., 1986)          | <sup>327</sup>   | No statements present                                                                                                                                                                                                                                                                                                                                                                                                                                                                                                                                                                                                                                                                                                                                                                                                                                 | No information to extract                           | N           | N                |                                                                                                                                       |

| Reference                     | Reference number | Extracted Text                                                                                                                                                                                                                                        | AEs related to TENS           | Statement | Extractable Data   | Comment                                                                                                                                                                                                                                                                                          |
|-------------------------------|------------------|-------------------------------------------------------------------------------------------------------------------------------------------------------------------------------------------------------------------------------------------------------|-------------------------------|-----------|--------------------|--------------------------------------------------------------------------------------------------------------------------------------------------------------------------------------------------------------------------------------------------------------------------------------------------|
| (Smania et al., 2005)         | <sup>328</sup>   | No statements present                                                                                                                                                                                                                                 | No information to extract     | N         | N                  | There was data missing from final analysis but no explanation given                                                                                                                                                                                                                              |
| (Smedley et al., 1988)        | <sup>329</sup>   | No statements present                                                                                                                                                                                                                                 | No information to extract     | N         | N                  |                                                                                                                                                                                                                                                                                                  |
| (Smith et al., 1983)          | <sup>330</sup>   | Only one patient noticed any adverse effects from the treatment, a mild skin reaction to the electrode jelly.                                                                                                                                         | Skin irritation in 1 patient. | Y         | N                  | No numerical data to extract                                                                                                                                                                                                                                                                     |
| (Smith et al., 1986)          | <sup>331</sup>   | No statements present                                                                                                                                                                                                                                 | No information to extract     | N         | N                  |                                                                                                                                                                                                                                                                                                  |
| (Sodipo et al., 1980)         | <sup>332</sup>   | No statements present                                                                                                                                                                                                                                 | No information to extract     | N         | N                  |                                                                                                                                                                                                                                                                                                  |
| (Solak et al., 2007)          | <sup>333</sup>   | No statements present                                                                                                                                                                                                                                 | No information to extract     | N         | N                  |                                                                                                                                                                                                                                                                                                  |
| (Solak et al., 2009)          | <sup>334</sup>   | No statements present                                                                                                                                                                                                                                 | No information to extract     | N         | N                  |                                                                                                                                                                                                                                                                                                  |
| (Sonde et al., 1998)          | <sup>335</sup>   | No statements present                                                                                                                                                                                                                                 | No information to extract     | N         | N                  |                                                                                                                                                                                                                                                                                                  |
| (Stepanovic et al., 2015)     | <sup>336</sup>   | Adverse effects were associated with a specific treatment of herpes zoster ( <i>n</i> = 5) and analgesics prescribed ( <i>n</i> = 20). Most common complication was a bacterial superinfection, in either group there was no serious complication.    | Reported no adverse events    | Y         | N = 0<br>TENS ONLY |                                                                                                                                                                                                                                                                                                  |
| (Steptoe and Bo, 1984)        | <sup>337</sup>   | TENS is almost free from adverse events                                                                                                                                                                                                               | No information to extract     | N         | N                  |                                                                                                                                                                                                                                                                                                  |
| (Stratton and Smith, 1980)    | <sup>338</sup>   | No statements present                                                                                                                                                                                                                                 | No information to extract     | N         | N                  |                                                                                                                                                                                                                                                                                                  |
| (Stubbing and Jellicoe, 1988) | <sup>339</sup>   | No statements present                                                                                                                                                                                                                                 | No information to extract     | N         | N                  |                                                                                                                                                                                                                                                                                                  |
| (Suh et al., 2015)            | <sup>340</sup>   | No statements present                                                                                                                                                                                                                                 | No information to extract     | N         | N                  |                                                                                                                                                                                                                                                                                                  |
| (Talbot et al., 2020)         | <sup>341</sup>   | No statements present                                                                                                                                                                                                                                 | No information to extract     | N         | N                  |                                                                                                                                                                                                                                                                                                  |
| (Tantawy et al., 2018)        | <sup>342</sup>   | No statements present                                                                                                                                                                                                                                 | No information to extract     | N         | N                  |                                                                                                                                                                                                                                                                                                  |
| (Taylor et al., 1981)         | <sup>343</sup>   | No statements present                                                                                                                                                                                                                                 | No information to extract     | N         | N                  |                                                                                                                                                                                                                                                                                                  |
| (Taylor et al., 1983)         | <sup>344</sup>   | No statements present                                                                                                                                                                                                                                 | No information to extract     | N         | N                  |                                                                                                                                                                                                                                                                                                  |
| (Thakur and Patidar, 2004)    | <sup>345</sup>   | Side effects were more in the tramadol group in the form of nausea 7%, vomiting 3%, drowsiness 2% and fetal distress 2%, what while in the control group only one percent had fetal distress. Intense group none had any side effects Data in Table 6 | Reported no adverse events    | Y         | Y                  | Data extracted<br>TENS = 0 events / 100<br>Control (no intervention) = 1 event / 100 participants (Fetal distress)<br><br>Also: Tramadol = 14 / 100 participants (nausea, vomiting, drowsiness, fetal distress)<br>– did not add to forest plot to prevent double counting in sub group analysis |
| (Thomas et al., 1988)         | <sup>346</sup>   | No statements present                                                                                                                                                                                                                                 | No information to extract     | N         | N                  |                                                                                                                                                                                                                                                                                                  |
| (Thomas et al., 1995)         | <sup>347</sup>   | No statements present                                                                                                                                                                                                                                 | No information to extract     | N         | N                  |                                                                                                                                                                                                                                                                                                  |
| (Thorsteinsson et al., 1978)  | <sup>348</sup>   | No statements present                                                                                                                                                                                                                                 | No information to extract     | N         | N                  |                                                                                                                                                                                                                                                                                                  |
| (Tilak et al., 2016)          | <sup>349</sup>   | No statements present                                                                                                                                                                                                                                 | No information to extract     | N         | N                  |                                                                                                                                                                                                                                                                                                  |



| Reference                   | Reference number | Extracted Text                                                                                                                                                                                                                                                                                                                                                                                                                                                                                                  | AEs related to TENS                                                | Statement   | Extractable Data | Comment                                                                                                                                             |
|-----------------------------|------------------|-----------------------------------------------------------------------------------------------------------------------------------------------------------------------------------------------------------------------------------------------------------------------------------------------------------------------------------------------------------------------------------------------------------------------------------------------------------------------------------------------------------------|--------------------------------------------------------------------|-------------|------------------|-----------------------------------------------------------------------------------------------------------------------------------------------------|
| (Tokuda et al., 2014)       | <sup>350</sup>   | We observed no side effects; thus, TENS may be particularly useful for patients who have liver or kidney disease considering that analgesics are excreted through the kidney.                                                                                                                                                                                                                                                                                                                                   | Reported no adverse events                                         | Y = 0 tally | N = 0 tally      |                                                                                                                                                     |
| (Tonella et al., 2006)      | <sup>351</sup>   | No statements present                                                                                                                                                                                                                                                                                                                                                                                                                                                                                           | No information to extract                                          |             | N                |                                                                                                                                                     |
| (Topuz et al., 2004)        | <sup>352</sup>   | No statements present                                                                                                                                                                                                                                                                                                                                                                                                                                                                                           | No information to extract                                          | N           | N                |                                                                                                                                                     |
| (Tosato et al., 2007)       | <sup>353</sup>   | No statements present                                                                                                                                                                                                                                                                                                                                                                                                                                                                                           | No information to extract                                          | N           | N                |                                                                                                                                                     |
| (Treacy, 1999)              | <sup>354</sup>   | No statements present                                                                                                                                                                                                                                                                                                                                                                                                                                                                                           | No information to extract                                          | N           | N                |                                                                                                                                                     |
| (Tsen et al., 2000)         | <sup>355</sup>   | Some have raised the concern that TENS could interfere with fetal heart rate tracings,1 1 however, this was not witnessed in our review of fetal tracings, nor did we observe any incidents of non-reassuring fetal tracings2 4 subsequent to the CSE placement in either group.                                                                                                                                                                                                                                | Reported no adverse events.                                        | Y = 0 tally | N = 0 tally      |                                                                                                                                                     |
| (Tsen et al., 2001)         | <sup>356</sup>   | No statements present                                                                                                                                                                                                                                                                                                                                                                                                                                                                                           | No information to extract                                          | N           | N                | Authors stated they would record adverse events but no comments included in results or discussion.                                                  |
| (Tsukayama et al., 2002)    | <sup>357</sup>   | No adverse events were reported by the evaluator. The therapists reported some transient adverse events, for the EA group: transient aggravation of LBP (1 case), discomfort due to press tack needles (1 case), pain on needle insertion (1 case) and small subcutaneous bleeding (10mm in diameter, 1 case); in the TENS group: transient aggravation of back pain (1 case), transient fatigue (1 case), itching with electrode (1 case). Seven patients in each group did not experience any adverse events. | Increased back pain<br>Transient fatigue<br>Itching with electrode | Y           | Y                | Data extracted (symptom aggravation, skin reaction, fatigue)<br>TENS = 3 events / 10 participants<br>Electroacupuncture = 4 events / 9 participants |
| (Tucker et al., 2015)       | <sup>358</sup>   | There were no clinically significant adverse events related to TENS in either group. In table 2 of their report                                                                                                                                                                                                                                                                                                                                                                                                 | Reported no adverse events                                         | Y = 0 tally | N = 0 tally      |                                                                                                                                                     |
| (Tugay et al., 2007)        | <sup>359</sup>   | No adverse effects were observed, supporting the findings of the related literature.                                                                                                                                                                                                                                                                                                                                                                                                                            | Reported no adverse events                                         | Y = 0 tally | N = 0 TENS ONLY  |                                                                                                                                                     |
| (Tulgar et al., 1991a)      | <sup>360</sup>   | No statements present                                                                                                                                                                                                                                                                                                                                                                                                                                                                                           | No information to extract                                          | N           | N                |                                                                                                                                                     |
| (Tulgar et al., 1991b)      | <sup>361</sup>   | No statements present                                                                                                                                                                                                                                                                                                                                                                                                                                                                                           | No information to extract                                          | N           | N                |                                                                                                                                                     |
| (Unterrainer et al., 2010)  | <sup>362</sup>   | In conclusion, the use of TENS before skin incision and postoperative is noninvasive, safe, simple, and free of systemic side effects in postoperative pain treatment after major spinal surgery.                                                                                                                                                                                                                                                                                                               | Reported no adverse events                                         | Y = 0 tally | N = 0 TENS ONLY  |                                                                                                                                                     |
| (Unterrainer et al., 2012)  | <sup>363</sup>   | No statements present                                                                                                                                                                                                                                                                                                                                                                                                                                                                                           | No information to extract                                          | N           | N                |                                                                                                                                                     |
| (Upton et al., 2017)        | <sup>364</sup>   | No adverse effects reported during the study.                                                                                                                                                                                                                                                                                                                                                                                                                                                                   | Reported no adverse events                                         | Y = 0 tally | N = 0 tally      |                                                                                                                                                     |
| (Vaidya, 2018)              | <sup>365</sup>   | However, no negative effects were found with the use of TENS in any stage of pregnancy which supports the finding of our study [9]. No negative effects were reported for any of the patients.                                                                                                                                                                                                                                                                                                                  | Reported no adverse events                                         | Y = 0 tally | N = 0 tally      |                                                                                                                                                     |
| (Vaillancourt et al., 2019) | <sup>366</sup>   | No statements present                                                                                                                                                                                                                                                                                                                                                                                                                                                                                           | No information to extract                                          | N           | N                |                                                                                                                                                     |

| Reference                    | Reference number | Extracted Text                                                                                                                                                                                                                                                                                                                                                                                                                                                                                                                                                                          | AEs related to TENS        | Statement   | Extractable Data | Comment                                                                                                                                                                                                                                                                                                       |
|------------------------------|------------------|-----------------------------------------------------------------------------------------------------------------------------------------------------------------------------------------------------------------------------------------------------------------------------------------------------------------------------------------------------------------------------------------------------------------------------------------------------------------------------------------------------------------------------------------------------------------------------------------|----------------------------|-------------|------------------|---------------------------------------------------------------------------------------------------------------------------------------------------------------------------------------------------------------------------------------------------------------------------------------------------------------|
| (Valenza et al., 2016)       | <sup>367</sup>   | No adverse effects were reported by any participant after any of the interventions.                                                                                                                                                                                                                                                                                                                                                                                                                                                                                                     | Reported no adverse events | Y = 0 tally | N = 0 tally      |                                                                                                                                                                                                                                                                                                               |
| (van der Ploeg et al., 1996) | <sup>368</sup>   | No adverse side-effects occurred.                                                                                                                                                                                                                                                                                                                                                                                                                                                                                                                                                       | Reported no adverse events | Y = 0 tally | N = 0 tally      |                                                                                                                                                                                                                                                                                                               |
| (van der Spank et al., 2000) | <sup>369</sup>   | No statements present                                                                                                                                                                                                                                                                                                                                                                                                                                                                                                                                                                   | No information to extract  | N           | N                |                                                                                                                                                                                                                                                                                                               |
| (Vance et al., 2012)         | <sup>370</sup>   | No statements present                                                                                                                                                                                                                                                                                                                                                                                                                                                                                                                                                                   | No information to extract  | N           | N                |                                                                                                                                                                                                                                                                                                               |
| (Vitalii and Oleg, 2014)     | <sup>371</sup>   | No side effects of LF-TENS were seen. Mean gabapentin dose was 1036.36 mg in the study group and 1560 mg in the control group, thus the basic dose was increased by 136.36 mg of gabapentin in the study group and by 560 mg in the control group (P=0.004; Fig. 2). Three patients from the control group reported drowsiness and dizziness on the ninth day of treatment (doses of gabapentin increased to 2700, 2400 and 1800 mg) and one patient reported blurred vision (dose of gabapentin increased to 2700 mg). No side effects of gabapentin were reported in the study group. | Reported no adverse events | Y           | N                | No data extracted because AEs due to the higher doses of gabapentin in control group. Thus, data reflects TENS efficacy in reducing AEs associated with gabapentin<br><br>TENS + gabapentin = 0 events<br>Placebo TENS + gabapentin = 4 events (drowsiness + dizziness, blurred vision related to gabapentin) |
| (Vrouva et al., 2019)        | <sup>372</sup>   | No statements present                                                                                                                                                                                                                                                                                                                                                                                                                                                                                                                                                                   | No information to extract  | N           | N                |                                                                                                                                                                                                                                                                                                               |
| (Walker et al., 1991)        | <sup>373</sup>   | No statements present                                                                                                                                                                                                                                                                                                                                                                                                                                                                                                                                                                   | No information to extract  | N           | N                |                                                                                                                                                                                                                                                                                                               |
| (Wang et al., 2009)          | <sup>374</sup>   | No statements present                                                                                                                                                                                                                                                                                                                                                                                                                                                                                                                                                                   | No information to extract  | N           | N                |                                                                                                                                                                                                                                                                                                               |
| (Warfield et al., 1985)      | <sup>375</sup>   | There were no complications in either group as a result of TENS. We conclude that TENS is a safe, effective adjunctive therapy for post thoracotomy pain.                                                                                                                                                                                                                                                                                                                                                                                                                               | Reported no adverse events | Y = 0 tally | N = 0 tally      |                                                                                                                                                                                                                                                                                                               |
| (Warke et al., 2004)         | <sup>376</sup>   | No statements present                                                                                                                                                                                                                                                                                                                                                                                                                                                                                                                                                                   | No information to extract  | N           | N                |                                                                                                                                                                                                                                                                                                               |
| (Warke et al., 2006)         | <sup>377</sup>   | No statements present                                                                                                                                                                                                                                                                                                                                                                                                                                                                                                                                                                   | No information to extract  | N           | N                |                                                                                                                                                                                                                                                                                                               |
| (Yameen et al., 2011)        | <sup>378</sup>   | No statements present                                                                                                                                                                                                                                                                                                                                                                                                                                                                                                                                                                   | No information to extract  | N           |                  | Transcutaneous electrical nerve stimulation is an effective, easy to use and with minimal side effects in patients suffering from trigeminal neuralgia not responding to conventional therapy.                                                                                                                |
| (Yesil et al., 2018)         | <sup>379</sup>   | No adverse events due to electrotherapy such as irritation or burning of the skin were observed.                                                                                                                                                                                                                                                                                                                                                                                                                                                                                        | Reported no adverse events | Y = 0 tally | N = 0 TENS ONLY  |                                                                                                                                                                                                                                                                                                               |
| (Yilmaz et al., 2020)        | <sup>380</sup>   | We did not observe any side effects or intolerance associated with TENS in our patients. Also, TENS application did not cause any negative changes in vital signs. This result indicates that TENS is easily applied, and its efficacy and safety could help in pain relief for inguinal herniorrhaphy.                                                                                                                                                                                                                                                                                 | Reported no adverse events | Y = 0 tally | N = 0 TENS ONLY  |                                                                                                                                                                                                                                                                                                               |

| Reference                     | Reference number | Extracted Text                                                                       | AEs related to TENS         | Statement   | Extractable Data | Comment                                                                                                                     |
|-------------------------------|------------------|--------------------------------------------------------------------------------------|-----------------------------|-------------|------------------|-----------------------------------------------------------------------------------------------------------------------------|
| (Yilmazer et al., 2012)       | <sup>381</sup>   | No statements present                                                                | No information to extract   | N           | N                |                                                                                                                             |
| (Yokoyama et al., 2004)       | <sup>382</sup>   | No statements present                                                                | No information to extract   | N           | N                |                                                                                                                             |
| (Yoshimizu et al., 2012)      | <sup>383</sup>   | No adverse effects or carryover effect were detected.                                | Reported no adverse events  | Y = 0 tally | N = 0 tally      |                                                                                                                             |
| (Yüksel et al., 2019)         | <sup>384</sup>   | No statements present                                                                | No information to extract   | N           | N                |                                                                                                                             |
| (Yurtkuran and Kocagil, 1999) | <sup>385</sup>   | No statements present                                                                | No information to extract   | N           | N                |                                                                                                                             |
| (Zakariaee et al., 2019)      | <sup>386</sup>   | No statements present                                                                | No information to extract   | N           | N                | Mentions that adverse events will be documented but then fails to provide data or clear statement in results nor discussion |
| (Zhang et al., 2020)          | <sup>387</sup>   | No statements present                                                                | No information to extract   | N           | N                |                                                                                                                             |
| (Zhou et al., 2018)           | <sup>388</sup>   | No adverse events were observed in either of the groups during the 8-week follow-up. | Reported no adverse events. | Y = 0 tally | N = 0 tally      |                                                                                                                             |

### Legend

Information was identified by searching for text and/or numerical data that referred to adverse events. Information was ‘cut and pasted’ into this Table. Where available, data on the occurrence of adverse events in each intervention arm was tallied as events (irrespective of severity) per number participants exposed (i.e. number in intervention arm), pooled and meta-analysed. If trial reports included a statement that no adverse events were observed during the study this was identified as such in our table. We only extracted data as ‘zero’ when the RCT report included numerical data for the presence of at least one adverse event in one of the trial arms and clearly stated that no adverse events had occurred in the other trial arm(s), in line with advice from the Cochrane Collaboration. Y, yes; N, no; TENS, transcutaneous electrical nerve stimulation.

### REFERENCES\*

\*Note: Reference numbering in this list relates only to studies cited in this table

1. Abbasi AA, Shehzad M, Hussain A. Transcutaneous Electrical Nerve Encouragement by Way of the Adjunct to Non-Steroidal Unwilling-Inflammatory Medicines for Aching Management Throughout Pleurodesis. *Indo American Journal of Pharmaceutical Sciences* 2019; **6**(6): 12943-7.
2. Abelson K, Langely GB, Sheppard H. Transcutaneous electrical nerve stimulation in rheumatoid arthritis. *New Zealand Medical Journal* 1983; **96**(727): 156-8.
3. Abreu EA, Santos JDMd, Ventura PLJRD. Efetividade da eletroestimulação nervosa transcutânea no alívio da dor durante o trabalho de parto: um ensaio clínico controlado. 2010; **11**(4): 313-8.
4. Acedo AA, Ludovice Antunes AC, Barros dos Santos A, et al. Upper trapezius relaxation induced by TENS and interferential current in computer users with chronic nonspecific neck discomfort: An electromyographic analysis. *Journal of back and musculoskeletal rehabilitation* 2015; **28**(1): 19-24.
5. Adedoyin RA, Olaogun MOB, Oyeyemi AL. Transcutaneous electrical nerve stimulation and interferential current combined with exercise for the treatment of knee osteoarthritis: a randomised controlled trial. *Hong Kong Physiotherapy Journal* 2005; **23**: 13-9.

6. Ahmed MT. Effect of transcutaneous electrical nerve stimulation on postoperative pain after inguinal hernia repair: A randomized placebo-controlled trial. [Turkish]. *Turkiye Fiziksel Tip ve Rehabilitasyon Dergisi* 2010; **56**(4): 170-6.
7. Ahmed GM, Maher EA, Elnassag BAEMR, Sayed HM, Kabbash SI. Effects of repetitive transcranial magnetic stimulation versus transcutaneous electrical nerve stimulation to decrease diabetic neuropathic pain. *International Journal of Therapy and Rehabilitation* 2020; **27**(2).
8. Alcidi L, Beneforti E, Maresca M, Santosuosso U, Zoppi M. Low power radiofrequency electromagnetic radiation for the treatment of pain due to osteoarthritis of the knee. *Reumatismo* 2007; **59**(2): 140-5.
9. Ali J, Yaffe CS, Serrette C. The effect of transcutaneous electric nerve stimulation on postoperative pain and pulmonary function. *Surgery* 1981; **89**(4): 507-12.
10. Alizade MH, Ahmadizad S. A comparison of exercise therapy and transcutaneous electrical nerve stimulation for the treatment of chronic low back pain. *Word J Sport Sci* 2009; **2**(1): 43-7.
11. Allais G, De Lorenzo C, Quirico PE, et al. Non-pharmacological approaches to chronic headaches: Transcutaneous electrical nerve stimulation, lasertherapy and acupuncture in transformed migraine treatment. *Neurological Sciences* 2003; **24**(SUPPL. 2): S138-S42.
12. Alm WA, Gold ML, Weil LS. Evaluation of transcutaneous electrical nerve stimulation (TENS) in podiatric surgery. *Journal of the American Podiatry Association* 1979; **69**(9): 537-42.
13. Al-Smadi J, Warke K, Wilson I, et al. A pilot investigation of the hypoalgesic effects of transcutaneous electrical nerve stimulation upon low back pain in people with multiple sclerosis. *Clinical rehabilitation* 2003; **17**(7): 742-9.
14. Altay F, Durmus D, Cantürk F. Effects of TENS on pain, disability, quality of life and depression in patients with knee osteoarthritis. *Turkish Journal of Rheumatology* 2010; **25**(3): 116-21.
15. Alvarez-Arenal A, Junquera LM, Fernandez JP, Gonzalez I, Olay S. Effect of occlusal splint and transcutaneous electric nerve stimulation on the signs and symptoms of temporomandibular disorders in patients with bruxism. *Journal of oral rehabilitation* 2002; **29**(9): 858-63.
16. Alves Silverio KC, Brasolotto AG, Thais Donalson Siqueira L, Carneiro CG, Fukushiro AP, Roberto de Jesus Guirro R. Effect of application of transcutaneous electrical nerve stimulation and laryngeal manual therapy in dysphonic women: clinical trial. *Journal of voice : official journal of the Voice Foundation* 2015; **29**(2): 200-8.
17. Amer-Cuenca JJ, Goicoechea C, Girona-Lopez A, et al. Pain relief by applying transcutaneous electrical nerve stimulation (TENS) during unsedated colonoscopy: a randomized double-blind placebo-controlled trial. *European journal of pain (London, England)* 2011; **15**(1): 29-35.
18. AminiSaman J, Karimpour H, Hemmatpour B, Mohammadi S, Darvishi S, Kawyannejad R. Effect of TENS on the Pain Intensity during Insertion of Needle in Patients Undergoing Spinal anesthesia: A Randomized Controlled Study. *Journal of acupuncture and meridian studies* 2020.
19. Angulo DL, Colwell Jr CW. Use of postoperative TENS and continuous passive motion following total knee replacement. *Journal of Orthopaedic and Sports Physical Therapy* 1990; **11**(12): 599-604.
20. Ardic F, Sarhus M, Topuz O. Comparison of two different techniques of electrotherapy on myofascial pain. *Journal of back and musculoskeletal rehabilitation* 2002; **16**(1): 11-6.
21. Arvidsson I, Eriksson E. Postoperative TENS pain relief after knee surgery: objective evaluation. *Orthopedics* 1986; **9**(10): 1346-51.
22. Asgari Z, Tavoli Z, Hosseini R, et al. A Comparative Study between Transcutaneous Electrical Nerve Stimulation and Fentanyl to Relieve Shoulder Pain during Laparoscopic Gynecologic Surgery under Spinal Anesthesia: A Randomized Clinical Trial. *Pain research & management* 2018; **2018**: 9715142.
23. Atamaz FC, Durmaz B, Baydar M, et al. Comparison of the efficacy of transcutaneous electrical nerve stimulation, interferential currents, and shortwave diathermy in knee osteoarthritis: a double-blind, randomized, controlled, multicenter study. *Archives of physical medicine and rehabilitation* 2012; **93**(5): 748-56.
24. Aydin G, Tomruk S, Keles I, Demir SO, Orkun S. Transcutaneous electrical nerve stimulation versus baclofen in spasticity: Clinical and electrophysiologic comparison. *American Journal of Physical Medicine and Rehabilitation* 2005; **84**(8): 584-92.
25. Azatcam G, Atalay NS, Akkaya N, et al. Comparison of effectiveness of Transcutaneous Electrical Nerve Stimulation and Kinesio Taping added to exercises in patients with myofascial pain syndrome. *Journal of back and musculoskeletal rehabilitation* 2017; **30**(2): 291-8.

26. Báez-Suárez A, Martín-Castillo E, García-Andújar J, García-Hernández J, Quintana-Montesdeoca MP, Loro-Ferrer JF. Evaluation of different doses of transcutaneous nerve stimulation for pain relief during labour: a randomized controlled trial. *Trials* 2018; **19**(1): 652.
27. Bai HY, Bai HY, Yang ZQ. Effect of transcutaneous electrical nerve stimulation therapy for the treatment of primary dysmenorrhea. *Medicine* 2017; **96**(36): e7959.
28. Baki ED, Oz G, Kokulu S, et al. Comparison of Transcutaneous Electrical Nerve Stimulation and Paravertebral Block for Postthoracotomy Pain Relief. *The Thoracic and cardiovascular surgeon* 2015; **63**(6): 514-8.
29. Ballegaard S, Christophersen S, Dawids S, Hesse J, Olsen N. Acupuncture and transcutaneous electric nerve stimulation in the treatment of pain associated with chronic pancreatitis. A randomized study. *Scand J Gastroenterol* 1985; **20**(10): 1249-54.
30. Barbarisi M, Pace MC, Passavanti MB, et al. Pregabalin and transcutaneous electrical nerve stimulation for postherpetic neuralgia treatment. *The Clinical journal of pain* 2010; **26**(7): 567-72.
31. Barker R, Lang T, Steinlechner B, et al. Transcutaneous electrical nerve stimulation as prehospital emergency interventional care: Treating acute pelvic pain in young women. *Neuromodulation : journal of the International Neuromodulation Society* 2006; **9**(2): 136-42.
32. Barker KL, Elliott CJ, Sackley CM, Fairbank JC. Treatment of chronic back pain by sensory discrimination training. A Phase I RCT of a novel device (FairMed) vs. TENS. *BMC musculoskeletal disorders* 2008; **9**: 97.
33. Başkurt Z, Başkurt F, Özcan A, Yılmaz Ö. The immediate effects of heat and TENS on pressure pain threshold and pain intensity in patients with Stage I shoulder impingement syndrome. *The Pain Clinic* 2006; **18**(1): 81-5.
34. Bayindir O, Paker T, Akpınar B, Erenturk S, Askin D, Aytac A. Use of transcutaneous electrical nerve stimulation in the control of postoperative chest pain after cardiac surgery. *Journal of cardiothoracic and vascular anesthesia* 1991; **5**(6): 589-91.
35. Beckwée D, Bautmans I, Lefeber N, Lievens P, Scheerlinck T, Vaes P. Effect of Transcutaneous Electric Nerve Stimulation on Pain after Total Knee Arthroplasty: a Blind Randomized Controlled Trial. *Journal of knee surgery* 2018; **31**(2): 189-96.
36. Benedetti F, Amanzio M, Casadio C, et al. Control of postoperative pain by transcutaneous electrical nerve stimulation after thoracic operations. *The Annals of thoracic surgery* 1997; **63**(3): 773-6.
37. Bennett MI, Johnson MI, Brown SR, Radford H, Brown JM, Searle RD. Feasibility study of Transcutaneous Electrical Nerve Stimulation (TENS) for cancer bone pain. *The journal of pain : official journal of the American Pain Society* 2010; **11**(4): 351-9.
38. Bergeron-Vezina K, Filion C, Couture C, Vallee E, Laroche S, Leonard G. Adjusting Pulse Amplitude During Transcutaneous Electrical Nerve Stimulation Does Not Provide Greater Hypoalgesia. *Journal of alternative and complementary medicine (New York, NY)* 2018; **24**(3): 262-7.
39. Bertalanffy A, Kober A, Bertalanffy P, et al. Transcutaneous electrical nerve stimulation reduces acute low back pain during emergency transport. *Academic emergency medicine : official journal of the Society for Academic Emergency Medicine* 2005; **12**(7): 607-11.
40. Bi X, Lv H, Chen BL, Li X, Wang XQ. Effects of transcutaneous electrical nerve stimulation on pain in patients with spinal cord injury: a randomized controlled trial. *Journal of Physical Therapy Science* 2015; **27**(1): 23-5.
41. Bilgili A, Cakir T, Dogan SK, Ercalik T, Filiz MB, Toraman F. The effectiveness of transcutaneous electrical nerve stimulation in the management of patients with complex regional pain syndrome: A randomized, double-blinded, placebo-controlled prospective study. *Journal of back and musculoskeletal rehabilitation* 2016; **29**(4): 661-71.
42. Binder P, Gustafsson A, Uvnas-Moberg K, Nissen E. Hi-TENS combined with PCA-morphine as post caesarean pain relief. *Midwifery* 2011; **27**(4): 547-52.
43. Bjersa K, Andersson T. High frequency TENS as a complement for pain relief in postoperative transition from epidural to general analgesia after pancreatic resection. *Complementary therapies in clinical practice* 2014; **20**(1): 5-10.
44. Bjersa K, Jildenstaal P, Jakobsson J, Egardt M, Fagevik Olsen M. Adjunct High Frequency Transcutaneous Electric Stimulation (TENS) for Postoperative Pain Management during Weaning from Epidural Analgesia Following Colon Surgery: Results from a Controlled Pilot Study. *Pain management nursing : official journal of the American Society of Pain Management Nurses* 2015; **16**(6): 944-50.



- 1  
2  
3 45. Bloodworth DM, Nguyen BN, Garver W, et al. Comparison of stochastic vs. conventional transcutaneous electrical stimulation for pain modulation in patients with  
4 electromyographically documented radiculopathy. *American journal of physical medicine & rehabilitation* 2004; **83**(8): 584-91.
- 5 46. Bolat MS, Cinar O, Asci R, Buyukalpelli R. A novel method for pain control: infiltration free local anesthesia technique (INFLATE) for transrectal prostatic biopsy  
6 using transcutaneous electrical nerve stimulation (TENS). *International urology and nephrology* 2019; **51**(12): 2119-26.
- 7 47. Bono F, Salvino D, Mazza MR, et al. The influence of ictal cutaneous allodynia on the response to occipital transcutaneous electrical stimulation in chronic migraine  
8 and chronic tension-type headache: a randomized, sham-controlled study. *Cephalalgia* 2015; **35**(5): 389-98.
- 9 48. Borjesson M, Eriksson P, Dellborg M, Eliasson T, Mannheimer C. Transcutaneous electrical nerve stimulation in unstable angina pectoris. *Coronary artery disease*  
10 1997; **8**(8-9): 543-50.
- 11 49. Borjesson M, Pilhall M, Eliasson T, Norssell H, Mannheimer C, Rolny P. Esophageal visceral pain sensitivity: Effects of TENS and correlation with manometric  
12 findings. *Digestive Diseases and Sciences* 1998; **43**(8): 1621-8.
- 13 50. Borup L, Wurlitzer W, Hedegaard M, Kesmodel US, Hvidman L. Acupuncture as pain relief during delivery: a randomized controlled trial. *Birth (berkeley, calif)*  
14 2009; **36**(1): 5-12.
- 15 51. Breit R, Van der Wall H. Transcutaneous electrical nerve stimulation for postoperative pain relief after total knee arthroplasty. *The Journal of arthroplasty* 2004;  
16 **19**(1): 45-8.
- 17 52. Buchmuller A, Navez M, Milletre-Bernardin M, et al. Value of TENS for relief of chronic low back pain with or without radicular pain. *European journal of pain*  
18 (*London, England*) 2012; **16**(5): 656-65.
- 19 53. Bulut M, Özcan A, Çakan T, Mektas M, Çulha C. The Comparison of Effectiveness of TENS and Placebo TENS in Peripheral Neuropathic Pain in Patients with  
20 Type II Diabetes Mellitus. *Turkiye Klinikleri Journal of Medical Sciences* 2011; **31**(4): 913-8.
- 21 54. Bundsen P, Ericson K, Peterson L, Thiringer K. Pain relief in labor by transcutaneous electrical nerve stimulation. Testing of a modified stimulation technique and  
22 evaluation of the neurological and biochemical condition of the newborn infant. *Acta obstetrica et gynecologica Scandinavica* 1982; **61**(2): 129-36.
- 23 55. Can F, Tandogan R, Yilmaz I, Dolunay E, Erden Z. Rehabilitation of patellofemoral pain syndrome: TENS versus diadynamic current therapy for pain relief. *Pain*  
24 *Clinic* 2003; **15**(1): 61-8.
- 25 56. Casale R, Damiani C, Maestri R, Wells CD. Pain and electrophysiological parameters are improved by combined 830-1064 high-intensity LASER in symptomatic  
26 carpal tunnel syndrome versus Transcutaneous Electrical Nerve Stimulation. A randomized controlled study. *European journal of physical and rehabilitation medicine* 2013;  
27 **49**(2): 205-11.
- 28 57. Çebi AT. Effects of transcutaneous electrical nerve stimulation on pain after impacted third molar surgery. *Medicina Oral Patologia Oral y Cirugia Bucal* 2019;  
29 **24**(3): e404-e8.
- 30 58. Celik EC, Erhan B, Gunduz B, Lakse E. The effect of low-frequency TENS in the treatment of neuropathic pain in patients with spinal cord injury. *Spinal cord*  
31 2013; **51**(4): 334-7.
- 32 59. Cetin N, Aytar A, Atalay A, Akman M. Comparing hot pack, short-wave diathermy, ultrasound, and TENS on isokinetic strength, pain, and functional status of  
33 women with osteoarthritic knees: a single-blind, randomized, controlled trial. *American Journal of Physical Medicine and Rehabilitation* 2008; **87**(6): 443-51.
- 34 60. Chandra A, Banavaliker JN, Das PK, Hasti S. Use of transcutaneous electrical nerve stimulation as an adjunctive to epidural analgesia in the management of acute  
35 thoracotomy pain. *Indian J Anaesth* 2010; **54**(2): 116-20.
- 36 61. Cheing GL, Hui-Chan CW. Transcutaneous electrical nerve stimulation: nonparallel antinociceptive effects on chronic clinical pain and acute experimental pain.  
37 *Archives of physical medicine and rehabilitation* 1999; **80**(3): 305-12.
- 38 62. Cheing GL, Luk ML. Transcutaneous electrical nerve stimulation for neuropathic pain. *Journal of hand surgery (Edinburgh, Scotland)* 2005; **30**(1): 50-5.
- 39 63. Cheing GL, Hui-Chan CW, Chan KM. Does four weeks of TENS and/or isometric exercise produce cumulative reduction of osteoarthritic knee pain? *Clinical*  
40 *rehabilitation* 2002; **16**(7): 749-60.
- 41  
42  
43  
44  
45  
46



- 1  
2  
3 64. Cheing GL, Tsui AY, Lo SK, Hui-Chan CW. Optimal stimulation duration of tens in the management of osteoarthritic knee pain. *Journal of rehabilitation medicine* 2003; **35**(2): 62-8.
- 4 65. Chellappa D, Thirupathy M. Comparative efficacy of low-Level laser and TENS in the symptomatic relief of temporomandibular joint disorders: a randomized clinical trial. *Indian journal of dental research* 2020; **31**(1): 42-7.
- 5 66. Cherian JJ, Harrison PE, Benjamin SA, Bhave A, Harwin SF, Mont MA. Do the Effects of Transcutaneous Electrical Nerve Stimulation on Knee Osteoarthritis Pain and Function Last? *The journal of knee surgery* 2016; **29**(6): 497-501.
- 6 67. Cherian JJ, Kapadia BH, McElroy MJ, et al. Knee Osteoarthritis: Does Transcutaneous Electrical Nerve Stimulation Work? *Orthopedics* 2016; **39**(1): e180-6.
- 7 68. Chesterton LS, Lewis AM, Sim J, et al. Transcutaneous electrical nerve stimulation as adjunct to primary care management for tennis elbow: pragmatic randomised controlled trial (TATE trial). *BMJ (Clinical research ed)* 2013; **347**: f5160.
- 8 69. Lewis M, Chesterton LS, Sim J, Mallen CD, Hay EM, van der Windt DA. An Economic Evaluation of TENS in Addition to Usual Primary Care Management for the Treatment of Tennis Elbow: Results from the TATE Randomized Controlled Trial. *PloS one* 2015; **10**(8): e0135460.
- 9 70. Chia Y, Arulkumaran S, Chua S, Ratnam S. Effectiveness of transcutaneous electric nerve stimulator for pain relief in labour. *Asia Oceania J Obstet Gynaecol* 1990; **16**(2): 145-51.
- 10 71. Chiou YF, Yeh ML, Wang YJ. Transcutaneous Electrical Nerve Stimulation on Acupuncture Points Improves Myofascial Pain, Moods, and Sleep Quality. *Rehabil Nurs* 2019.
- 11 72. Chitsaz A, Janghorbani M, Shaygannejad V, Ashtari F, Heshmatipour M, Freeman J. Sensory complaints of the upper extremities in multiple sclerosis: relative efficacy of nortriptyline and transcutaneous electrical nerve stimulation. *The Clinical journal of pain* 2009; **25**(4): 281-5.
- 12 73. Chiu TT, Hui-Chan CW, Chein G. A randomized clinical trial of TENS and exercise for patients with chronic neck pain. *Clinical rehabilitation* 2005; **19**(8): 850-60.
- 13 74. Cipriano G, Jr., de Camargo Carvalho AC, Bernardelli GF, Tayar Peres PA. Short-term transcutaneous electrical nerve stimulation after cardiac surgery: effect on pain, pulmonary function and electrical muscle activity. *Interactive cardiovascular and thoracic surgery* 2008; **7**(4): 539-43.
- 14 75. Cipriano G, Jr., Neder JA, Umpierre D, et al. Sympathetic ganglion transcutaneous electrical nerve stimulation after coronary artery bypass graft surgery improves femoral blood flow and exercise tolerance. *Journal of applied physiology (Bethesda, Md : 1985)* 2014; **117**(6): 633-8.
- 15 76. Coelho de Amorim JS, Braz Rossetti Mr, Mendes Braga NIH. Effects of manual therapy and electrotherapy on knee osteoarthritis. *ConScientiae Saude* 2014; **13**(1): 11-20.
- 16 77. Cooperman AM, Hall B, Mikalacki K, Hardy R, Sardar E. Use of transcutaneous electrical stimulation in the control of postoperative pain. *American journal of surgery* 1977; **133**(2): 185-7.
- 17 78. Coyne PJ, MacMurren M, Izzo T, Kramer T. Transcutaneous electrical nerve stimulator for procedural pain associated with intravenous needlesticks. *Journal of intravenous nursing* 1995; **18**(5): 263-7.
- 18 79. Crompton AC, Johnson N, Dudek U, Batra N, Tucker A. Is transcutaneous electrical nerve stimulation of any value during cervical laser treatment? *British journal of obstetrics and gynaecology* 1992; **99**(6): 492-4.
- 19 80. Cuschieri RJ, Morran CG, McArdle CS. Transcutaneous electrical stimulation for postoperative pain. *Annals of the Royal College of Surgeons of England* 1985; **67**(2): 127-9.
- 20 81. Cuschieri RJ, Morran CG, Pollock JG. Transcutaneous electrical stimulation for ischaemic pain at rest. *British medical journal (Clinical research ed)* 1987; **295**(6593): 306.
- 21 82. da Silva TFG, Suda EY, Marçulo CA, Paes FHS, Pinheiro GT. Comparison of transcutaneous electrical nerve stimulation and hydrotherapy effects on pain, flexibility and quality of life in patients with fibromyalgia. *Fisioterapia e Pesquisa* 2008; **15**(2): 118-24 7p.
- 22 83. da Silva MP, Liebano RE, Rodrigues VA, Abla LE, Ferreira LM. Transcutaneous electrical nerve stimulation for pain relief after liposuction: a randomized controlled trial. *Aesthetic plastic surgery* 2015; **39**(2): 262-9.
- 23  
24  
25  
26  
27  
28  
29  
30  
31  
32  
33  
34  
35  
36  
37  
38  
39  
40  
41  
42  
43  
44  
45  
46

84. Dailey DL, Rakel BA, Vance CG, et al. Transcutaneous electrical nerve stimulation reduces pain, fatigue and hyperalgesia while restoring central inhibition in primary fibromyalgia. *Pain* 2013; **154**(11): 2554-62.
85. Dailey DL, Vance CGT, Rakel BA, et al. Transcutaneous Electrical Nerve Stimulation Reduces Movement-Evoked Pain and Fatigue: A Randomized, Controlled Trial. *Arthritis & Rheumatology* 2020; **72**(5): 824-36.
86. Davies JR. Ineffective transcutaneous nerve stimulation following epidural anaesthesia. *Anaesthesia* 1982 Apr; **37**(4):453-457 1982.
87. Dawood MY, Ramos J. Transcutaneous electrical nerve stimulation (TENS) for the treatment of primary dysmenorrhea: a randomized crossover comparison with placebo TENS and ibuprofen. *Obstetrics and gynecology* 1990; **75**(4): 656-60.
88. De Angelis C, Perrone G, Santoro G, Nofroni I, Zichella L. Suppression of pelvic pain during hysteroscopy with a transcutaneous electrical nerve stimulation device. *Fertility and sterility* 2003; **79**(6): 1422-7.
89. De Giorgi I, Castroflorio T, Sartoris B, Deregibus A. The use of conventional transcutaneous electrical nerve stimulation in chronic facial myalgia patients. *Clinical oral investigations* 2017; **21**(1): 275-80.
90. de Oliveira RGCQ, Silva, J.C., de Almeida, J.F., de Araajo, R.C., Pitangui, A.C.R. High and low frequency TENS for primary dysmenorrhea: preliminary study. *ConScientiae Saude* 2012; **11**(1): 149-58.
91. de Orange FA, Amorim MMRd, Lima L. Uso da eletroestimulação transcutânea para alívio da dor durante o trabalho de parto em uma maternidade-escola: ensaio clínico controlado %J Revista Brasileira de Ginecologia e Obstetrícia. 2003; **25**: 45-52.
92. de Sousa L, Gomes-Sponholz FA, Nakano AM. Transcutaneous electrical nerve stimulation for the relief of post-partum uterine contraction pain during breast-feeding: a randomized clinical trial. *The journal of obstetrics and gynaecology research* 2014; **40**(5): 1317-23.
93. DeSantana JM, Santana-Filho VJ, Guerra DR, Sluka KA, Gurgel RQ, da Silva Jr WM. Hypoalgesic Effect of the Transcutaneous Electrical Nerve Stimulation Following Inguinal Herniorrhaphy: A Randomized, Controlled Trial. *Journal of Pain* 2008; **9**(7): 623-9.
94. DeSantana J, Sluka K, Rocha LG. High and low frequency TENS reduce postoperative pain intensity after laparoscopic tubal ligation: A randomized controlled trial. *Clinical Journal of Pain* 2009; **25**(2): 12-28.
95. Dewan A, Sharma R. Effectiveness of transcutaneous electrical nerve stimulation and interferential electrotherapy in adhesive capsulitis. *Pb Journal of Orthopaedics* 2011; **21**(1): 64.
96. Deyo RA, Walsh NE, Martin DC, Schoenfeld LS, Ramamurthy S. A controlled trial of transcutaneous electrical nerve stimulation (TENS) and exercise for chronic low back pain. *The New England journal of medicine* 1990; **322**(23): 1627-34.
97. Dibenedetto P, Iona LG, Zidarich V. CLINICAL-EVALUATION OF S-ADENOSYL-L-METHIONINE VERSUS TRANSCUTANEOUS ELECTRICAL NERVE-STIMULATION IN PRIMARY FIBROMYALGIA. *Current Therapeutic Research-Clinical and Experimental* 1993; **53**(2): 222-9.
98. Dilekci E, Alpayci M, Bayram KB, et al. The efficacy of TENS in patients with lateral epicondylitis: A randomized controlled study. [Turkish]. *Turkiye Fiziksel Tip ve Rehabilitasyon Dergisi* 2016; **62**(4): 297-302.
99. Dissanayaka TD, Pallegama RW, Suraweera HJ, Johnson MI, Kariyawasam AP. Comparison of the Effectiveness of Transcutaneous Electrical Nerve Stimulation and Interferential Therapy on the Upper Trapezius in Myofascial Pain Syndrome: A Randomized Controlled Study. *American journal of physical medicine & rehabilitation* 2016; **95**(9): 663-72.
100. Dogu B, Yilmaz F, Karan A, Ergoz E, Kuran B. Comparative the effectiveness of occlusal splint and TENS treatments on clinical findings and pain threshold of temporomandibular disorders secondary to bruxism. [Turkish]. *Turkiye Fiziksel Tip ve Rehabilitasyon Dergisi* 2008; **54**(4): 1-7.
101. Domaille M, Reeves B. TENS and pain control after coronary artery bypass surgery. *Physiotherapy* 1997; **83**(10): 510-6.
102. Ebadi S, Ansari N, Ahadi T, Fallah E, Forogh B. No immediate analgesic effect of diadynamic current in patients with nonspecific low back pain in comparison to TENS. *Journal of Bodywork and Movement Therapies* 2018; **22**(3): 693-9.
103. Ekblom A, Hansson P. Thermal sensitivity is not changed by acute pain or afferent stimulation. *Journal of neurology, neurosurgery, and psychiatry* 1987; **50**(9): 1216-20.

- 1  
2  
3 104. Ekim A, Armagan O, Oner C. [Efficiency of TENS treatment in hemiplegic shoulder pain: a placebo controlled study]. *Agri : Agri (Algoloji) Dernegi'nin Yayin organidir = The journal of the Turkish Society of Algology* 2008; **20**(1): 41-6.
- 4 105. Elboim-Gabyzon M, Andrawus Najjar S, Shtarker H. Effects of transcutaneous electrical nerve stimulation (TENS) on acute postoperative pain intensity and mobility after hip fracture: a double-blinded, randomized trial. *Clinical interventions in aging* 2019; **14**: 1841-50.
- 5 106. Elserty N, Kattabei O, Elhafez H. Effect of Fixed Versus Adjusted Transcutaneous Electrical Nerve Stimulation Amplitude on Chronic Mechanical Low Back Pain. *Journal of alternative and complementary medicine (New York, NY)* 2016; **22**(7): 557-62.
- 6 107. Emmiler M, Solak O, Kocogullari C, et al. Control of acute postoperative pain by transcutaneous electrical nerve stimulation after open cardiac operations: a randomized placebo-controlled prospective study. *The heart surgery forum* 2008; **11**(5): E300-3.
- 7 108. Engen DJ, Carns PE, Allen MS, et al. Evaluating efficacy and feasibility of transcutaneous electrical nerve stimulation for postoperative pain after video-assisted thoracoscopic surgery: A randomized pilot trial. *Complementary therapies in clinical practice* 2016; **23**: 141-8.
- 8 109. Erden S, Senol Celik S. The effect of transcutaneous electrical nerve stimulation on post-thoracotomy pain. *Contemporary nurse* 2015; **51**(2-3): 163-70.
- 9 110. Erdogan M, Erdogan A, Erbil N, Karakaya H, Demircan A. Prospective, randomized, placebo-controlled study of the effect of TENS on postthoracotomy pain and pulmonary function. *World journal of surgery* 2005; **29**(12): 1563-70.
- 10 111. Erkkola R, Pikkola P, Kanto J. Transcutaneous nerve stimulation for pain relief during labour: a controlled study. *Annales chirurgiae ET gynaecologiae* 1980; **69**(6): 273-7.
- 11 112. Escortell-Mayor E, Riesgo-Fuertes R, Garrido-Elustondo S, et al. Primary care randomized clinical trial: manual therapy effectiveness in comparison with TENS in patients with neck pain. *Manual therapy* 2011; **16**(1): 66-73.
- 12 113. Escortell Mayor E, Lebrero Perez G, Perez Martin Y, Asunsolo del Barco A, Riesgo Fuertes R, Saa Requejo C. [Randomized clinical trial for primary care patients with neck pain: manual therapy versus electrical stimulation]. *Atencion primaria* 2008; **40**(7): 337-43.
- 13 114. Esteban Gonzalez P, Novoa NM, Varela G. Transcutaneous Electrical Nerve Stimulation Reduces Post-Thoracotomy Ipsilateral Shoulder Pain. A Prospective Randomized Study. *Archivos de bronconeumologia* 2015; **51**(12): 621-6.
- 14 115. Eyigor S, Karapolat H, Ibisoglu U, Durmaz B. Does transcutaneous electrical nerve stimulation or therapeutic ultrasound increase the effectiveness of exercise for knee osteoarthritis: A randomized controlled study. [Turkish]. *Agri : Agri (Algoloji) Dernegi'nin Yayin organidir = The journal of the Turkish Society of Algology* 2008; **20**(1): 32-40.
- 15 116. Eyigor C, Eyigor S, Kivilcim Korkmaz O. Are intra-articular corticosteroid injections better than conventional TENS in treatment of rotator cuff tendinitis in the short run? A randomized study. *European journal of physical and rehabilitation medicine* 2010; **46**(3): 315-24.
- 16 117. Facci LM, Nowotny JP, Tormem F, Trevisani VF. Effects of transcutaneous electrical nerve stimulation (TENS) and interferential currents (IFC) in patients with nonspecific chronic low back pain: randomized clinical trial. *Sao Paulo medical journal = Revista paulista de medicina* 2011; **129**(4): 206-16.
- 17 118. Farahani DM, Tavallaie SA, Ahmadi K, Ashtiani AF. Comparison of Neurofeedback and Transcutaneous Electrical Nerve Stimulation Efficacy on Treatment of Primary Headaches: A Randomized Controlled Clinical Trial. *Iranian Red Crescent Medical Journal* 2014; **16**(8).
- 18 119. Farina S, Casarotto M, Benelle M, et al. A randomized controlled study on the effect of two different treatments (FREMS AND TENS) in myofascial pain syndrome. *Europa medicophysica* 2004; **40**(4): 293-301.
- 19 120. Fatima N, Sarfraz N. Comparison of High Versus Low Transcutaneous Electrical Nerve Stimulation for Pain Management After Caesarean Section: A Clinical Trial. *Annals of King Edward Medical University Lahore Pakistan* 2019; **25**(2).
- 20 121. Ferraz FS, Moreira CMC. Eletroanalgesia com utilizacao da TENS no pos-operatorio de cirurgia cardiaca (Electroanalgesia with TENS in postoperative of cardiac surgery) [Portuguese]. *Fisioterapia em Movimento [Physical Therapy in Movement]* 2009 Jan-Mar; **22**(1):133-139 2009.
- 21 122. Ferreira FC, Issy AM, Sakata RK. Assessing the effects of transcutaneous electrical nerve stimulation (TENS) in post-thoracotomy analgesia. *Revista brasileira de anesthesiologia* 2011; **61**(5): 561-7, 308-10.
- 22  
23  
24  
25  
26  
27  
28  
29  
30  
31  
32  
33  
34  
35  
36  
37  
38  
39  
40  
41  
42  
43  
44  
45  
46

- 1  
2  
3 123. Ferreira AP, Costa DR, Oliveira AI, et al. Short-term transcutaneous electrical nerve stimulation reduces pain and improves the masticatory muscle activity in  
4 temporomandibular disorder patients: a randomized controlled trial. *Journal of applied oral science : revista FOB* 2017; **25**(2): 112-20.
- 5 124. Finsen V, Persen L, Lovlien M, et al. Transcutaneous electrical nerve stimulation after major amputation. *The Journal of bone and joint surgery British volume*  
6 1988; **70**(1): 109-12.
- 7 125. Fiorelli A, Morgillo F, Milione R, et al. Control of post-thoracotomy pain by transcutaneous electrical nerve stimulation: effect on serum cytokine levels, visual  
8 analogue scale, pulmonary function and medication. *European journal of cardio-thoracic surgery : official journal of the European Association for Cardio-thoracic Surgery*  
9 2012; **41**(4): 861-8; discussion 8.
- 10 126. Fodor-Sertl B, Miller K, Hohenfellner B. (Transcutaneous electric nerve block in postoperative pain-therapy) [German]. *Zeitschrift fuer Physikalische Medizin,*  
11 *Balneologie, Medizinische Klimatologie* 1990; **19**: 132-7.
- 12 127. Forogh B, Aslanpour H, Fallah E, Babaei-Ghazani A, Ebadi S. Adding high-frequency transcutaneous electrical nerve stimulation to the first phase of post anterior  
13 cruciate ligament reconstruction rehabilitation does not improve pain and function in young male athletes more than exercise alone: a randomized single-blind clinical trial.  
14 *Disability and rehabilitation* 2019; **41**(5): 514-22.
- 15 128. Forst T, Nguyen M, Forst S, Disselhoff B, Pohlmann T, Pftzner A. Impact of low frequency transcutaneous electrical nerve stimulation on symptomatic diabetic  
16 neuropathy using the new Salutaris (R) device. *Diabetes Nutrition & Metabolism* 2004; **17**(3): 163-8.
- 17 129. Forster EL, Kramer JF, Lucy SD, Scudds RA, Novick RJ. Effect of TENS on pain, medications, and pulmonary function following coronary artery bypass graft  
18 surgery. *Chest* 1994; **106**(5): 1343-8.
- 19 130. Fujii-Abe K, Umino M, Kawahara H, Terada C, Satomura K, Fukayama H. New method for postoperative pain relief using a combination of noxious and non-  
20 noxious stimuli after impacted wisdom tooth extraction. *Journal of oral science* 2019; **61**(2): 364-9.
- 21 131. Galli TT, Chiavegato LD, Liebano RE. Effects of TENS in living kidney donors submitted to open nephrectomy: a randomized placebo-controlled trial. *European*  
22 *journal of pain (London, England)* 2015; **19**(1): 67-76.
- 23 132. Galloway DJ, Boyle P, Burns HJ, Davidson PM, George WD. A clinical assessment of electroanalgesia following abdominal operations. *Surgery, gynecology &*  
24 *obstetrics* 1984; **159**(5): 453-6.
- 25 133. Garcia-Perez S, Garcia-Rios MC, Perez-Marmol JM, et al. Effectiveness of Transcutaneous Electrical Nerve Stimulation Energy in Older Adults: A Pilot Clinical  
26 Trial. *Advances in skin & wound care* 2018; **31**(10): 462-9.
- 27 134. Gerson GR, Jones RB, Luscombe DK. Studies on the concomitant use of carbamazepine and clomipramine for the relief of post-herpetic neuralgia. *Postgraduate*  
28 *medical journal* 1977; **53 Suppl 4**: 104-9.
- 29 135. Ghoname ESA, Craig WF, White PF, et al. Percutaneous electrical nerve stimulation for low back pain - A randomized crossover study. *Jama-Journal of the*  
30 *American Medical Association* 1999; **281**(9): 818-23.
- 31 136. Ghoname ESA, White PF, Ahmed HE, Hamza MA, Craig WF, Noe CE. Percutaneous electrical nerve stimulation: an alternative to TENS in the management of  
32 sciatica. *Pain* 1999; **83**(2): 193-9.
- 33 137. Gilbert JM, Gledhill T, Law N, George C. Controlled trial of transcutaneous electrical nerve stimulation (TENS) for postoperative pain relief following inguinal  
34 herniorrhaphy. *The British journal of surgery* 1986; **73**(9): 749-51.
- 35 138. Grabiańska E, Leśniewicz J, Pieszyński I, Kostka J. Comparison of the analgesic effect of interferential current (IFC) and TENS in patients with low back pain.  
36 *Wiadomości lekarskie (Warsaw, Poland)* 2015; **68**(1): 13-9.
- 37 139. Graff-Radford S, Reeves J, Baker R, Chiu D. Effects of transcutaneous electrical nerve stimulation on myofascial pain and trigger point sensitivity. *Pain* 1989;  
38 **37**(1): 1-5.
- 39 140. Grant DJ, Bishop\_Miller J, Winchester DM, Anderson M, Faulkner S. A randomized comparative trial of acupuncture versus transcutaneous electrical nerve  
40 stimulation for chronic back pain in the elderly. *Pain* 1999; **82**(1): 9-13.
- 41  
42  
43  
44  
45  
46



- 1  
2  
3 141. Gregorini C, Cipriano Jr G, De Aquino LM, Rodrigues Branco JN, Bernardelli GF. Short-duration transcutaneous electrical nerve stimulation in the postoperative  
4 period of cardiac surgery. [Portuguese, English]. *Arquivos brasileiros de cardiologia* 2010; **94**(3): 325-31+45-51.
- 5 142. Grimmer K. A controlled double blind study comparing the effects of strong burst mode TENS and High Rate TENS on painful osteoarthritic knees. *Australian  
6 Journal of Physiotherapy* 1992; **38**: 49-56.
- 7 143. Gschiel B, Kager H, Pipam W, Weichart K, Likar R. Analgesic efficacy of TENS therapy in patients with gonarthrosis. A prospective, randomised, placebo-  
8 controlled, double-blind study. [German]. *Schmerz (Berlin, Germany)* 2010; **24**(5): 494-500.
- 9 144. Gunay Ucurum S, Kaya DO, Kayali Y, Askin A, Tekindal MA. Comparison of different electrotherapy methods and exercise therapy in shoulder impingement  
10 syndrome: a prospective randomized controlled trial. *Acta orthopaedica et traumatologica turcica* 2018; **52**(4): 249-55.
- 11 145. Guo XJ, Jia J. Comparison of therapeutic effects on fibromyalgia syndrome between dermal-neurological electric stimulation and electric acupuncture. *Chinese  
12 Journal of Clinical Rehabilitation* 2005; **9**(46): 171-3.
- 13 146. Hamza MA, White PF, Ahmed HE, Ghoname EA. Effect of the frequency of transcutaneous electrical nerve stimulation on the postoperative opioid analgesic  
14 requirement and recovery profile. *Anesthesiology* 1999; **91**(5): 1232-8.
- 15 147. Hanfy HM, El-Bigawy A. Effects of transcutaneous electrical nerve stimulation versus acupressure in the treatment of primary dysmenorrhea. *Bull Fac Phys Ther  
16 Cairo Univ* 2004; **9**: 2.
- 17 148. Hansson P, Eklblom A. Transcutaneous electrical nerve stimulation (TENS) as compared to placebo TENS for the relief of acute oro-facial pain. *Pain* 1983; **15**(2):  
18 157-65.
- 19 149. Hansson P, Eklblom A, Thomsson M, Fjellner B. Influence of naloxone on relief of acute oro-facial pain by transcutaneous electrical nerve stimulation (TENS) or  
20 vibration. *Pain* 1986; **24**(3): 323-9.
- 21 150. Hargreaves A, Lander J. Use of transcutaneous electrical nerve stimulation for postoperative pain. *Nursing research* 1989; **38**(3): 159-61.
- 22 151. Harrison RF, Woods T, Shore M, Mathews G, Unwin A. Pain relief in labour using transcutaneous electrical nerve stimulation (TENS). A TENS/TENS placebo  
23 controlled study in two parity groups. *British journal of obstetrics and gynaecology* 1986; **93**(7): 739-46.
- 24 152. Hart JM, Kuenze CM, Pietrosimone BG, Ingersoll CD. Quadriceps function in anterior cruciate ligament-deficient knees exercising with transcutaneous electrical  
25 nerve stimulation and cryotherapy: a randomized controlled study. *Clinical rehabilitation* 2012; **26**(11): 974-81.
- 26 153. Hazneci B, Tan AK, Ozdem T, Dincer K, Kalyon TA. The effects of transcutaneous electroneurostimulation and ultrasound in the treatment of reflex sympathetic  
27 dystrophy syndrome. [Turkish]. *Turkiye Fiziksel Tip ve Rehabilitasyon Dergisi* 2005; **51**(3): 83-9.
- 28 154. Herrera-Lasso I, Mobarak L, Fernández-Dominguez L, Cardiel MH, Alarcón-Segovia D. Comparative Effectiveness of Packages of Treatment Including Ultrasound  
29 or Transcutaneous Electrical Nerve Stimulation in Painful Shoulder Syndrome. *Physiotherapy* 1993; **79**(4): 251-3.
- 30 155. Hershman M CW, Swift R, Reilly D, Gompertz H, Wood C. Transcutaneous electrical nerve stimulation as adjunctive analgesia in patients undergoing abdominal  
31 procedures. *Surg Res Commun* 1989; **7**: 65-9.
- 32 156. Hou CR, Tsai LC, Cheng KF, Chung KC, Hong C. Immediate effects of various physical therapeutic modalities on cervical myofascial pain and trigger-point  
33 sensitivity. *Archives of physical medicine and rehabilitation* 2002; **83**(10): 1406-14.
- 34 157. Hokenek NM, Erdogan MO, Hokenek UD, Algin A, Tekyol D, Seyhan AU. Treatment of migraine attacks by transcutaneous electrical nerve stimulation in  
35 emergency department: A randomize controlled trial. *American Journal of Emergency Medicine* 2020.
- 36 158. Hruby G, Ames C, Chen C, et al. Assessment of efficacy of transcutaneous electrical nerve stimulation for pain management during office-based flexible  
37 cystoscopy. *Urology* 2006; **67**(5): 914-7.
- 38 159. Hsieh CYJ, Phillips RB, Adams AH, Pope MH. First prize: Functional outcomes of low back pain: Comparison of four treatment groups in a randomized controlled  
39 trial. *Journal of manipulative and physiological therapeutics* 1992; **15**(1): 4-9.
- 40 160. Hsueh TC, Cheng PT, Kuan TS, Hong CZ. The immediate effectiveness of electrical nerve stimulation and electrical muscle stimulation on myofascial trigger  
41 points. *American journal of physical medicine & rehabilitation* 1997; **76**(6): 471-6.
- 42  
43  
44  
45  
46

- 1  
2  
3 161. Hughes S, Dailey P, Partridge C. Transcutaneous electrical nerve stimulation for labour analgesia. *Anesthesia and analgesia* 1988; **67**: S99.
- 4 162. Husch HH, Watte G, Zanon M, et al. Effects of Transcutaneous Electrical Nerve Stimulation on Pain, Pulmonary Function, and Respiratory Muscle Strength After  
5 Posterolateral Thoracotomy: A Randomized Controlled Trial. *Lung* 2020; **198**(2): 345-53.
- 6 163. Ilhanli I. Conventional, Acupuncture-Like or Brief-Intense: Is There Any Difference Between TENS Modalities According to Outcomes of Chronic Low Back Pain  
7 with Lumbar Disc Herniation. *Clinical Medicine Research* 2015; **4**(5): 143-50.
- 8 164. Inal EE, Eroglu P, Yucel SH, Orhan H. Which is the Appropriate Frequency of TENS in Managing Knee Osteoarthritis: High or Low Frequency? *Journal of*  
9 *Clinical and Analytical Medicine* 2016; **7**(3): 339-44.
- 10 165. Isik M, Ugur M, Yakisan RS, Sari T, Yilmaz N. Comparison of the effectiveness of medicinal leech and TENS therapy in the treatment of primary osteoarthritis of  
11 the knee : A randomized controlled trial. *Zeitschrift fur Rheumatologie* 2017; **76**(9): 798-805.
- 12 166. Jaafarpour M, Khani A, Javadifar N, Taghinejad H, Mahmoudi R, Saadipour KH. The analgesic effect of transcutaneous electrical nerve stimulation (TENS) on  
13 caesarean under spinal anaesthesia. *Journal of Clinical and Diagnostic Research* 2008; **2**(3): 815-9.
- 14 167. Jamison RN, Wan L, Edwards RR, Mei A, Ross EL. Outcome of a High-Frequency Transcutaneous Electrical Nerve Stimulator (hfTENS) Device for Low Back  
15 Pain: A Randomized Controlled Trial. *Pain Practice* 2019; **19**(5): 466-75.
- 16 168. Jarzem P, Harvey E, Arcaro N, Kaczorowski J. Transcutaneous electrical nerve stimulation (TENS) for short-term treatment of low back pain - randomized double  
17 blind crossover study of sham versus conventional TENS. *Journal of Musculoskeletal Pain* 2005; **13**(2): 11-7.
- 18 169. Jensen JE, Conn RR, Hazelrigg G, Hewett JE. The use of transcutaneous neural stimulation and isokinetic testing in arthroscopic knee surgery. *American journal of*  
19 *sports medicine* 1985; **13**(1): 27-33.
- 20 170. Jensen H, Zesler R, Christensen T. Transcutaneous electrical nerve stimulation (TNS) for painful osteoarthritis of the knee. *International journal of rehabilitation*  
21 *research Internationale Zeitschrift fur Rehabilitationsforschung Revue internationale de recherches de readaptation* 1991; **14**(4): 356-8.
- 22 171. Jones AYM, Hutchinson RC. A comparison of the analgesic effect of transcutaneous electrical nerve stimulation and entonox. *Physiotherapy* 1991; **77**(8): 526-30.
- 23 172. Kara B, Baskurt F, Acar S, et al. The effect of TENS on pain, function, depression, and analgesic consumption in the early postoperative period with spinal surgery  
24 patients. *Turkish neurosurgery* 2011; **21**(4): 618-24.
- 25 173. Kararmaz A, Kaya S, Karaman H, Turhanoglu S. Effect of the frequency of transcutaneous electrical nerve stimulation on analgesia during extracorporeal shock  
26 wave lithotripsy. *Urological research* 2004; **32**(6): 411-5.
- 27 174. Kayman-Kose S, Ario DT, Toktas H, et al. Transcutaneous electrical nerve stimulation (TENS) for pain control after vaginal delivery and cesarean section. *The*  
28 *journal of maternal-fetal & neonatal medicine : the official journal of the European Association of Perinatal Medicine, the Federation of Asia and Oceania Perinatal*  
*Societies, the International Society of Perinatal Obstet* 2014; **27**(15): 1572-5.
- 29 175. Keskin EA, Onur O, Keskin HL, Gumus, II, Kafali H, Turhan N. Transcutaneous electrical nerve stimulation improves low back pain during pregnancy.  
30 *Gynecologic and obstetric investigation* 2012; **74**(1): 76-83.
- 31 176. Kibar S, Konak HE, V SA, DoĖAnay ErdoĖAn B, EvcİK D. The Effectiveness of Combined Transcutaneous Electrical Nerve Stimulation and Interferential  
32 Current Therapy on Chronic Low Back Pain: A Randomized, Double-Blind, Sham-Controlled Study. *Journal of Physical Medicine & Rehabilitation Sciences / Fiziksel Tıp*  
33 *ve Rehabilitasyon Bilimleri Dergisi* 2020; **23**(1): 32-40.
- 34 177. Kim S, Park K, Son B, Jeon Y. The Effect of Transcutaneous Electrical Nerve Stimulation on Pain During Venous Cannulation. *Current Therapeutic Research*  
35 2012; **73**(4/5): 134-9.
- 36 178. Kim D-H, Yoon KB, Yoon DM, et al. Comparison of NSAID Patch Given as Monotherapy and NSAID Patch in Combination with Transcutaneous Electric Nerve  
37 Stimulation, a Heating Pad, or Topical Capsaicin in the Treatment of Patients with Myofascial Pain Syndrome of the Upper Trapezius: A Pilot Study. *Pain Medicine* 2014;  
38 **15**(12): 2128-38.
- 39 179. Kirupa K, Divya Mary SM, Vaishnavi G, Nithya Nisha R, Rennie Mercy J, Jaiganesh G. A comparative study of ultrasound therapy and transcutaneous electrical  
40 nerve stimulation in reducing pain for temporomandibular joint disorder. *Drug invention today* 2019; **12**(3): 515-7.
- 41  
42  
43  
44  
45  
46



- 1  
2  
3 180. Knobel R, Radünz V, Carraro TEJT, Contexto-Enfermagem. Use of transcutaneous electric nerve stimulation for pain relief in labour: a possible way to care the  
4 child-bearer. 2005; **14**(2): 229-36.
- 5 181. Koca I, Boyaci A, Tutoglu A, Ucar M, Kocaturk O. Assessment of the effectiveness of interferential current therapy and TENS in the management of carpal tunnel  
6 syndrome: a randomized controlled study. *Rheumatology international* 2014; **34**(12): 1639-45.
- 7 182. Kofotolis ND, Vlachopoulos SP, Kellis E. Sequentially allocated clinical trial of rhythmic stabilization exercises and TENS in women with chronic low back pain.  
8 *Clinical rehabilitation* 2008; **22**(2): 99-111.
- 9 183. Koke AJ, Schouten JS, Lamerichs-Geelen MJ, et al. Pain reducing effect of three types of transcutaneous electrical nerve stimulation in patients with chronic pain: a  
10 randomized crossover trial. *Pain* 2004; **108**(1-2): 36-42.
- 11 184. Korkmaz OK, Capaci K, Eyigor C, Eyigor S. Pulsed radiofrequency versus conventional transcutaneous electrical nerve stimulation in painful shoulder: a  
12 prospective, randomized study. *Clinical rehabilitation* 2010; **24**(11): 1000-8.
- 13 185. Kumar S, Rajee A. Effect of progressive muscular relaxation exercises versus transcutaneous electrical nerve stimulation on tension headache: A comparative study.  
14 *Hong Kong Physiotherapy Journal* 2014; **32**(2): 86-91.
- 15 186. Labrecque M, Nouwen A, Bergeron M, Rancourt JF. A randomized controlled trial of nonpharmacologic approaches for relief of low back pain during labor. *The*  
16 *Journal of family practice* 1999; **48**(4): 259-63.
- 17 187. Laitinen J, Nuutinen L. Failure of transcutaneous electrical nerve stimulation and indomethacin to reduce opiate requirement following cholecystectomy. *Acta*  
18 *anaesthesiologica Scandinavica* 1991; **35**(8): 700-5.
- 19 188. Lang T, Barker R, Steinlechner B, et al. TENS relieves acute posttraumatic hip pain during emergency transport. *The Journal of trauma* 2007; **62**(1): 184-8;  
20 discussion 8.
- 21 189. Langley GB, Sheppard H, Johnson M, Wigley RD. The analgesic effects of transcutaneous electrical nerve stimulation and placebo in chronic pain patients. A  
22 double-blind non-crossover comparison. *Rheumatology international* 1984; **4**(3): 119-23.
- 23 190. Lauretti GR, Chubaci EF, Mattos AL. Efficacy of the use of two simultaneously TENS devices for fibromyalgia pain. *Rheumatology international* 2013; **33**(8):  
24 2117-22.
- 25 191. Lauretti GR, Oliveira R, Parada F, Mattos AL. The New Portable Transcutaneous Electrical Nerve Stimulation Device Was Efficacious in the Control of Primary  
26 Dysmenorrhea Cramp Pain. *Neuromodulation : journal of the International Neuromodulation Society* 2015; **18**(6): 522-6; discussion -7.
- 27 192. Law PP, Cheing GL. Optimal stimulation frequency of transcutaneous electrical nerve stimulation on people with knee osteoarthritis. *Journal of rehabilitation*  
28 *medicine* 2004; **36**(5): 220-5.
- 29 193. Law PPW, Cheing GLY, Tsui AYY. Does transcutaneous electrical nerve stimulation improve the physical performance of people with knee osteoarthritis? *Journal*  
30 *of Clinical Rheumatology* 2004; **10**(6): 295-9.
- 31 194. Leandri M, Parodi CI, Corrieri N, Rigardo S. Comparison of TENS treatments in hemiplegic shoulder pain. *Scandinavian journal of rehabilitation medicine* 1990;  
32 **22**(2): 69-71.
- 33 195. Lee E, Chung I, Lee J, Lam P, Chin R. The role of transcutaneous electrical nerve stimulation in management of labour in obstetric patients. *Asia Oceania J Obstet*  
34 *Gynaecol* 1990; **16**(3): 247-54.
- 35 196. Lee CH, Lee TY, Her JS, Liao WL, Hsieh CL. Single-Blinded, Randomized Preliminary Study Evaluating the Effect of Transcutaneous Electrical Nerve Stimulation  
36 on Postoperative Pain in Patients with Colles' Fracture. *Journal of alternative and complementary medicine (New York, NY)* 2015; **21**(12): 754-8.
- 37 197. Lee JE, Anderson CM, Perkhounkova Y, Sleeuwenhoek BM, Louison RR. Transcutaneous Electrical Nerve Stimulation Reduces Resting Pain in Head and Neck  
38 Cancer Patients A Randomized and Placebo-Controlled Double-Blind Pilot Study. *Cancer Nursing* 2019; **42**(3): 218-28.
- 39 198. Leo KC, Dostal WF, Bossen DG, Eldridge VL, Fairchild ML, Evans RE. Effect of transcutaneous electrical nerve stimulation characteristics on clinical pain.  
40 *Physical therapy* 1986; **66**(2): 200-5.
- 41  
42  
43  
44  
45  
46

199. Leonard G, Cloutier C, Marchand S. Reduced analgesic effect of acupuncture-like TENS but not conventional TENS in opioid-treated patients. *The journal of pain : official journal of the American Pain Society* 2011; **12**(2): 213-21.
200. Lewers D, Clelland J, Jackson J, Varner R, Bergman J. Transcutaneous electrical nerve stimulation in the relief of primary dysmenorrhea. *Physical therapy* 1989; **69**(1): 3-9.
201. Lewis D, Lewis B, Sturrock R. Transcutaneous electrical nerve stimulation in osteoarthritis: a therapeutic alternative? *Annals of the rheumatic diseases* 1984; **43**(1): 47-9.
202. Lewis B, Lewis D, Cumming G. The comparative analgesic efficacy of transcutaneous electrical nerve stimulation and a non-steroidal anti-inflammatory drug for painful osteoarthritis. *British journal of rheumatology* 1994; **33**(5): 455-60.
203. Likar R, Molnar M, Pipam W, et al. Postoperative transcutaneous electrical nerve stimulation (TENS) in shoulder surgery (randomized, double blind, placebo controlled pilot trial). [German]. *Schmerz (Berlin, Germany)* 2001; **15**(3): 158-63.
204. Lim AT, Edis G, Kranz H, Mendelson G, Selwood T, Scott DF. Postoperative pain control: contribution of psychological factors and transcutaneous electrical stimulation. *Pain* 1983; **17**(2): 179-88.
205. Lima PMB, Farias RTFB, Carvalho ACA, da Silva PNC, Filho NAF, de Brito RF. Transcutaneous electrical nerve stimulation after coronary artery bypass graft surgery. *Brazilian Journal of Cardiovascular Surgery* 2011; **26**(4): 591-6.
206. Limoges MF, Rickabaugh B. Evaluation of TENS during screening flexible sigmoidoscopy. *Gastroenterology nursing : the official journal of the Society of Gastroenterology Nurses and Associates* 2004; **27**(2): 61-8.
207. Lin ML, Luo YJ, Hsu YM, et al. Randomized controlled trial Comparing of Analgesic Effectiveness of TPRF and TENs in Clinical and Endocrinological Changes for Chronic Shoulder Pain; 2015.
208. Lin M-L, Chiu H-W, Shih Z-M, et al. Two Transcutaneous Stimulation Techniques in Shoulder Pain: Transcutaneous Pulsed Radiofrequency (TPRF) versus Transcutaneous Electrical Nerve Stimulation (TENS): A Comparative Pilot Study. *Pain research & management* 2019; **2019**: 2823401.
209. Linde C, Isacsson G, Jonsson BG. Outcome of 6-week treatment with transcutaneous electric nerve stimulation compared with splint on symptomatic temporomandibular joint disk displacement without reduction. *Acta odontologica scandinavica* 1995; **53**(2): 92-8.
210. Linn SL, Granat MH, Lees KR. Prevention of shoulder subluxation after stroke with electrical stimulation. *Stroke* 1999; **30**(5): 963-8.
211. Lison JF, Amer-Cuenca JJ, Piquer-Marti S, Benavent-Caballer V, Bivia-Roig G, Marin-Buck A. Transcutaneous Nerve Stimulation for Pain Relief During Office Hysteroscopy: A Randomized Controlled Trial. *Obstetrics and gynecology* 2017; **129**(2): 363-70.
212. Liu YC, Liao WS, Lien IN. Effect of transcutaneous electrical nerve stimulation for post-thoracotomy pain. *Taiwan I Hsueh Hui Tsa Chih* 1985; **84**(7): 801-9.
213. Liu Y, Dong Z, Wang R, et al. Migraine Prevention Using Different Frequencies of Transcutaneous Occipital Nerve Stimulation: A Randomized Controlled Trial. *The journal of pain : official journal of the American Pain Society* 2017; **18**(8): 1006-15.
214. Lofgren M, Norrbrink C. Pain relief in women with fibromyalgia: a cross-over study of superficial warmth stimulation and transcutaneous electrical nerve stimulation. *Journal of rehabilitation medicine* 2009; **41**(7): 557-62.
215. Luchesa CA, Greca FH, Guarita-Souza LC, Luiz Verde dos Santos J, Aquim EE. The role of electroanalgesia in patients undergoing coronary artery bypass surgery. [Portuguese]. *Brazilian Journal of Cardiovascular Surgery* 2009; **24**(3): 391-6.
216. Lundeborg T. A comparative study of the pain alleviating effect of vibratory stimulation, transcutaneous electrical nerve stimulation, electroacupuncture and placebo. *The American journal of Chinese medicine* 1984; **12**(1-4): 72-9.
217. Lundeborg T, Bondesson L, Lundstrom V. Relief of primary dysmenorrhea by transcutaneous electrical nerve stimulation. *Acta obstetrica et gynecologica Scandinavica* 1985; **64**(6): 491-7.
218. Machado AFP, Perracini MR, Rampazo ÉP, Driusso P, Liebano RE. Effects of thermotherapy and transcutaneous electrical nerve stimulation on patients with primary dysmenorrhea: A randomized, placebo-controlled, double-blind clinical trial. *Complementary therapies in medicine* 2019; **47**: N.PAG.
219. Machin D, Lewith GT, Wylson S. Pain measurement in randomized clinical trials. A comparison of two pain scales. *Clinical Journal of Pain* 1988; **4**(3): 161-8.

- 1  
2  
3 220. Mahure SA, Rokito AS, Kwon YW. Transcutaneous electrical nerve stimulation for postoperative pain relief after arthroscopic rotator cuff repair: a prospective  
4 double-blinded randomized trial. *Journal of shoulder and elbow surgery* 2017; **26**(9): 1508-13.
- 5 221. Manigandan JB, Ganesh GS, Pattnaik M, Mohanty P. Effect of electrical stimulation to long head of biceps in reducing gleno humeral subluxation after stroke.  
6 *NeuroRehabilitation* 2014; **34**(2): 245-52.
- 7 222. Mannheimer C, Carlsson C. The analgesic effect of transcutaneous electrical nerve stimulation (TNS) in patients with rheumatoid arthritis. A comparative study of  
8 different pulse patterns. *Pain* 1979; **6**(3): 329-34.
- 9 223. Mannheimer J, Whalen E. The efficacy of transcutaneous electric nerve stimulation in dysmenorrhea. *Clinical Journal of Pain* 1985; **1**: 75-83.
- 10 224. Mannheimer C, Lund S, Carlsson CA. The effect of transcutaneous electrical nerve stimulation (TNS) on joint pain in patients with rheumatoid arthritis.  
11 *Scandinavian journal of rheumatology* 1978; **7**(1): 13-6.
- 12 225. Mannheimer C, Carlsson C, Emanuelsson H, Vedin A, Waagstein F, Wilhelmsson C. The effects of transcutaneous electrical nerve stimulation in patients with  
13 severe angina pectoris. *Circulation* 1985; **71**(2): 308-16.
- 14 226. Mansourian A, Pourshahidi S, Sadrzadeh-Afshar MS, Ebrahimi H. A Comparative Study of Low-Level Laser Therapy and Transcutaneous Electrical Nerve  
15 Stimulation as an Adjunct to Pharmaceutical Therapy for Myofascial Pain Dysfunction Syndrome: A Randomized Clinical Trial. *Frontiers in dentistry* 2019; **16**(4): 256-64.
- 16 227. Mansuri B, Torabinezhad F, Jamshidi AA, Dabirmoghaddam P, Vasaghi-Gharamaleki B, Ghelichi L. Application of High-Frequency Transcutaneous Electrical  
17 Nerve Stimulation in Muscle Tension Dysphonia Patients With the Pain Complaint: The Immediate Effect. *Journal of Voice* 2019.
- 18 228. Mansuri B, Torabinezhad F, Jamshidi AA, Dabirmoghaddam P, Vasaghi-Gharamaleki B, Ghelichi L. Transcutaneous Electrical Nerve Stimulation Combined With  
19 Voice Therapy in Women With Muscle Tension Dysphonia. *Journal of Voice* 2020; **34**(3): 490.e11-e21.
- 20 229. Marchand S, Charest J, Li J, Chenard J, Lavignolle B, Laurencelle L. Is TENS purely a placebo effect? A controlled study on chronic low back pain [see comments].  
21 *Pain* 1993; **54**(1): 99-106.
- 22 230. Mascarin NC, Vancini RL, Andrade ML, Magalhaes Ede P, de Lira CA, Coimbra IB. Effects of kinesiotherapy, ultrasound and electrotherapy in management of  
23 bilateral knee osteoarthritis: prospective clinical trial. *BMC musculoskeletal disorders* 2012; **13**: 182.
- 24 231. McCallum M, Glynn C, Moore R, Lammer P, Phillips A. Transcutaneous electrical nerve stimulation in the management of acute postoperative pain. *British journal*  
25 *of anaesthesia* 1988; **61**(3): 308-12.
- 26 232. Melzack R, Vetere P, Finch L. Transcutaneous electrical nerve stimulation for low back pain. A comparison of TENS and massage for pain and range of motion.  
27 *Physical therapy* 1983; **63**(4): 489-93.
- 28 233. Merrill D. Clinical evaluation of FasTENS, an inexpensive, disposable transcutaneous electrical nerve stimulator designed specifically for postoperative  
29 electroanalgesia. *Urology* 1989; **33**(1): 27-30.
- 30 234. Miller L, Mattison P, Paul L, Wood L. The effects of transcutaneous electrical nerve stimulation (TENS) on spasticity in multiple sclerosis. *Multiple sclerosis*  
31 *(Houndmills, Basingstoke, England)* 2007; **13**(4): 527-33.
- 32 235. Milsom I, Hedner N, Mannheimer C. A comparative study of the effect of high-intensity transcutaneous nerve stimulation and oral naproxen on intrauterine pressure  
33 and menstrual pain in patients with primary dysmenorrhea. *American journal of obstetrics and gynecology* 1994; **170**(1 Pt 1): 123-9.
- 34 236. Moharic M, Marincek C, Vidmar G, Burger H. TRANSCUTANEOUS ELECTRICAL NERVE STIMULATION, PREGABALIN AND THEIR COMBINATION  
35 IN PATIENTS WITH PAINFUL DIABETIC NEUROPATHY: EFFECTS ON PAIN AND QUALITY OF LIFE. *Zdravniški Vestnik-Slovenian Medical Journal* 2009; **78**(8):  
36 371-80.
- 37 237. Mondal P, Biswas M, Saha J, Middhya AK. Effect of Trigger Point Injection Vs Ultrasonic Therapy Vs Transcutaneous Electrical Nerve Stimulation in  
38 Rehabilitation of Cervical and Peri-Scapular Myofascial Pain Syndrome- a Randomized Clinical Trial. *Journal of Evolution of Medical and Dental Sciences-Jemds* 2019;  
39 **8**(7): 430-6.
- 40 238. Moore SR, Shurman J. Combined neuromuscular electrical stimulation and transcutaneous electrical nerve stimulation for treatment of chronic back pain: a double-  
41 blind, repeated measures comparison. *Archives of physical medicine and rehabilitation* 1997; **78**(1): 55-60.
- 42  
43  
44  
45  
46

- 1  
2  
3 239. Mora B, Giorni E, Dobrovits M, et al. Transcutaneous electrical nerve stimulation: an effective treatment for pain caused by renal colic in emergency care. *The Journal of urology* 2006; **175**(5): 1737-41; discussion 41.
- 4 240. Morgan B, Jones AR, Mulcahy KA, Finlay DB, Collett B. Transcutaneous electric nerve stimulation (TENS) during distension shoulder arthrography: a controlled trial. *Pain* 1996; **64**(2): 265-7.
- 5 241. Møystad A, Krogstad BS, Larheim TA. Transcutaneous nerve stimulation in a group of patients with rheumatic disease involving the temporomandibular joint. *Journal of prosthetic dentistry* 1990; **64**(5): 596-600.
- 6 242. Murray S, Collins PD, James MA. An investigation into the 'carry over' effect of neurostimulation in the treatment of angina pectoris. *International journal of clinical practice* 2004; **58**(7): 669-74.
- 7 243. Mutlu B, Paker N, Bugdayci D, Tekdos D, Kesiktas N. Efficacy of supervised exercise combined with transcutaneous electrical nerve stimulation in women with fibromyalgia: a prospective controlled study. *Rheumatology international* 2013; **33**(3): 649-55.
- 8 244. Nabi BN, Sedighinejad A, Haghighi M, et al. Comparison of transcutaneous electrical nerve stimulation and pulsed radiofrequency sympathectomy for treating painful diabetic neuropathy. 2015; **5**(5).
- 9 245. Nash TP, Williams JD, Machin D. TENS: Does the type of stimulus really matter? *Pain Clinic* 1990; **3**(3): 161-8.
- 10 246. Navarathnam RG, Wang IY, Thomas D, Klineberg PL. Evaluation of the transcutaneous electrical nerve stimulator for postoperative analgesia following cardiac surgery. *Anaesthesia and intensive care* 1984; **12**(4): 345-50.
- 11 247. Neary J. Transcutaneous electrical nerve stimulation for the relief of post-incisional surgical pain. *AANA J* 1981; **49**(2): 151-5.
- 12 248. Neighbours LE, Clelland J, Jackson JR, Bergman J, Orr J. Transcutaneous electrical nerve stimulation for pain relief in primary dysmenorrhea. *The Clinical journal of pain* 1987; **3**(1): 17-22.
- 13 249. Nesheim BI. The use of transcutaneous nerve stimulation for pain relief during labor. A controlled clinical study. *Acta obstetrica et gynecologica Scandinavica* 1981; **60**(1): 13-6.
- 14 250. Neumark J, Pauser G, Scherzer W. Pain relief in childbirth; an analysis of the analgesic effects of transcutaneous nerve stimulation (TNS), pethidine and placebos (author's transl). *Praktische anasthesie, wiederbelebung und intensivtherapie* 1978; **13**(1): 13-20.
- 15 251. Ng MM, Leung MC, Poon DM. The effects of electro-acupuncture and transcutaneous electrical nerve stimulation on patients with painful osteoarthritic knees: a randomized controlled trial with follow-up evaluation. *Journal of alternative and complementary medicine (New York, NY)* 2003; **9**(5): 641-9.
- 16 252. Nordemar R, Thorner C. Treatment of acute cervical pain - A comparative group study. *Pain* 1981; **10**(1): 93-101.
- 17 253. Norrbrink C. Transcutaneous electrical nerve stimulation for treatment of spinal cord injury neuropathic pain. *Journal of rehabilitation research and development* 2009; **46**(1): 85-93.
- 18 254. Olsén MF, Elden H, Janson ED, Lilja H, Stener-Victorin E. A comparison of high- versus low-intensity, high-frequency transcutaneous electric nerve stimulation for painful postpartum uterine contractions. *Acta obstetrica et gynecologica Scandinavica* 2007; **86**(3): 310-4.
- 19 255. Fagevik Olsen M, Bjordahl S, Stahl A, Borjesson S, Sundemo A, Gutke A. Effects of high-intensity high-frequency transcutaneous electric nerve stimulation in primary dysmenorrhea-a randomised cross-over pilot study. *European Journal of Physiotherapy* 2019.
- 20 256. Oncel M, Sencan S, Yildiz H, Kurt N. Transcutaneous electrical nerve stimulation for pain management in patients with uncomplicated minor rib fractures. *European journal of cardio-thoracic surgery : official journal of the European Association for Cardio-thoracic Surgery* 2002; **22**(1): 13-7.
- 21 257. Oosterhof J, De Boo TM, Oostendorp RA, Wilder-Smith OH, Crul BJ. Outcome of transcutaneous electrical nerve stimulation in chronic pain: short-term results of a double-blind, randomised, placebo-controlled trial. *The journal of headache and pain* 2006; **7**(4): 196-205.
- 22 258. Oosterhof J, Samwel HJ, de Boo TM, Wilder-Smith OH, Oostendorp RA, Crul BJ. Predicting outcome of TENS in chronic pain: a prospective, randomized, placebo controlled trial. *Pain* 2008; **136**(1-2): 11-20.
- 23 259. Oosterhof J, Wilder-Smith OH, de Boo T, Oostendorp RA, Crul BJ. The long-term outcome of transcutaneous electrical nerve stimulation in the treatment for patients with chronic pain: a randomized, placebo-controlled trial. *Pain practice : the official journal of World Institute of Pain* 2012; **12**(7): 513-22.
- 24  
25  
26  
27  
28  
29  
30  
31  
32  
33  
34  
35  
36  
37  
38  
39  
40  
41  
42  
43  
44  
45  
46



- 1  
2  
3 260. Oosterhof J, Wilder-Smith OH, Oostendorp RA, Crul BJ. Different mechanisms for the short-term effects of real versus sham transcutaneous electrical nerve  
4 stimulation (TENS) in patients with chronic pain: a pilot study. *Journal of pain & palliative care pharmacotherapy* 2012; **26**(1): 5-12.
- 5 261. Ordog GJ. Transcutaneous electrical nerve stimulation versus oral analgesic: a randomized double-blind controlled study in acute traumatic pain. *The American*  
6 *journal of emergency medicine* 1987; **5**(1): 6-10.
- 7 262. Ozkaraoglu DK, Tarakci D, Algun ZC. Comparison of two different electrotherapy methods in low back pain treatment. *Journal of Back & Musculoskeletal*  
8 *Rehabilitation* 2020; **33**(2): 193-9.
- 9 263. Ozkul C, Kilinc M, Yildirim SA, Topcuoglu EY, Akyuz M. Effects of visual illusion and transcutaneous electrical nerve stimulation on neuropathic pain in patients  
10 with spinal cord injury: A randomised controlled cross-over trial. *Journal of back and musculoskeletal rehabilitation* 2015; **28**(4): 709-19.
- 11 264. Oztas B, Iyigun E. The effects of two different electrical stimulation methods on the pain intensity of the patients who had undergone abdominal surgery with a  
12 midline incision: Randomized Controlled Clinical Trial. *Contemporary nurse* 2019: 1-21.
- 13 265. Ozturk NK, Baki ED, Kavakli AS, et al. Comparison of Transcutaneous Electrical Nerve Stimulation and Parasternal Block for Postoperative Pain Management  
14 after Cardiac Surgery. *Pain research & management* 2016; **2016**: 4261949.
- 15 266. Padma, Prasanna A, Urala. Transcutaneous electrical nerve stimulation and labor pain. *Bahrain Medical Bulletin* 2000; **22**(1): 13-7.
- 16 267. Paker N, Tekdos D, Kesiktas N, Soy D. Comparison of the therapeutic efficacy of TENS versus intra-articular hyaluronic acid injection in patients with knee  
17 osteoarthritis: a prospective randomized study. *Advances in therapy* 2006; **23**(2): 342-53.
- 18 268. Palmer S, Domaille M, Cramp F, et al. Transcutaneous electrical nerve stimulation as an adjunct to education and exercise for knee osteoarthritis: a randomized  
19 controlled trial. *Arthritis care & research* 2014; **66**(3): 387-94.
- 20 269. Pan P, Chou C, Chiou H, Ma H, Lee H, Chan R. Extracorporeal shock wave therapy for chronic calcific tendinitis of the shoulders: a functional and sonographic  
21 study. *Archives of Physical Medicine & Rehabilitation* 2003; **84**(7): 988-93.
- 22 270. Park C, Choi JB, Lee YS, et al. The effect of intra-operative transcutaneous electrical nerve stimulation on posterior neck pain following thyroidectomy. *Anaesthesia*  
23 2015; **70**(4): 434-9.
- 24 271. Patil SR, Aileni KR. Effect of transcutaneous electrical nerve stimulation versus home exercise programme in management of temporomandibular joint disorder.  
25 *Journal of Clinical and Diagnostic Research* 2017; **11**(12): ZC19-ZC22.
- 26 272. Peacock KS, Stoerkel E, Libretto S, et al. A randomized trial comparing the Tennant Biomodulator to transcutaneous electrical nerve stimulation and traditional  
27 Chinese acupuncture for the treatment of chronic pain in military service members. *Military Medical Research* 2019; **6**(1): 37.
- 28 273. Pietrosimone BG, Hart JM, Saliba SA, Hertel J, Ingersoll CD. Immediate effects of transcutaneous electrical nerve stimulation and focal knee joint cooling on  
29 quadriceps activation. *Medicine and science in sports and exercise* 2009; **41**(6): 1175-81.
- 30 274. Pietrosimone BG, Saliba SA, Hart JM, Hertel J, Kerrigan DC, Ingersoll CD. Effects of transcutaneous electrical nerve stimulation and therapeutic exercise on  
31 quadriceps activation in people with tibiofemoral osteoarthritis. *The Journal of orthopaedic and sports physical therapy* 2011; **41**(1): 4-12.
- 32 275. Pietrosimone BG, Saliba SA, Hart JM, Hertel J, Kerrigan DC, Ingersoll CD. Effects of disinhibitory transcutaneous electrical nerve stimulation and therapeutic  
33 exercise on sagittal plane peak knee kinematics and kinetics in people with knee osteoarthritis during gait: a randomized controlled trial. *Clinical rehabilitation* 2010; **24**(12):  
34 1091-101.
- 35 276. Pietrosimone B, Luc-Harkey BA, Harkey MS, et al. Using TENS to Enhance Therapeutic Exercise in Individuals with Knee Osteoarthritis. *Medicine and science in*  
36 *sports and exercise* 2020.
- 37 277. Pike PM. Transcutaneous electrical stimulation. Its use in the management of postoperative pain. *Anaesthesia* 1978; **33**(2): 165-71.
- 38 278. Pitangui AC, de Sousa L, Gomes FA, Ferreira CH, Nakano AM. High-frequency TENS in post-episiotomy pain relief in primiparous puerpere: a randomized,  
39 controlled trial. *The journal of obstetrics and gynaecology research* 2012; **38**(7): 980-7.
- 40 279. Pitangui AC, Araújo RC, Bezerra MJ, Ribeiro CO, Nakano AM. Low and high-frequency TENS in post-episiotomy pain relief: a randomized, double-blind clinical  
41 trial. *Brazilian journal of physical therapy* 2014; **18**(1): 72-8.
- 42  
43  
44  
45  
46

- 1  
2  
3 280. Platon B, Andrell P, Raner C, Rudolph M, Dvoretzky A, Mannheimer C. High-frequency, high-intensity transcutaneous electrical nerve stimulation as treatment of  
4 pain after surgical abortion. *Pain* 2010; **148**(1): 114-9.
- 5 281. Platon B, Mannheimer C, Andrell P. Effects of high-frequency, high-intensity transcutaneous electrical nerve stimulation versus intravenous opioids for pain relief  
6 after gynecologic laparoscopic surgery: a randomized controlled study. *Korean Journal of Anesthesiology* 2018; **71**(2): 149-56.
- 7 282. Prabhakar R, Ramteke G. Cervical Spinal Mobilization Versus TENS in the Management of Cervical Radiculopathy: A Comparative, Experimental, Randomized  
8 controlled trial. *Indian Journal of Physiotherapy and Occupational Therapy* 2011; **5**(2): 128-33.
- 9 283. Presser M, Birkhan J, Adler R, Hanani A, Eisenberg E. Transcutaneous electrical nerve stimulation (TENS) during epidural steroids injection: a randomized  
10 controlled trial. *Pain Clinic* 2000; **12**(2): 77-80.
- 11 284. Rainov NG, Heidecke V, Albertz C, Burkert W. Transcutaneous electrical nerve stimulation (TENS) for acute postoperative pain after spinal surgery. *European*  
12 *Journal of Pain* 1994; **15**(2-3): 44-9.
- 13 285. Rajfur J, Pasternok M, Rajfur K, et al. Efficacy of Selected Electrical Therapies on Chronic Low Back Pain: a Comparative Clinical Pilot Study. *Medical science*  
14 *monitor* 2017; **23**: 85-100.
- 15 286. Rajpurohit B, Khatri SM, Metgud D, Bagewadi A. Effectiveness of transcutaneous electrical nerve stimulation and microcurrent electrical nerve stimulation in  
16 bruxism associated with masticatory muscle pain--a comparative study. *Indian journal of dental research : official publication of Indian Society for Dental Research* 2010;  
17 **21**(1): 104-6.
- 18 287. Raket B, Frantz R. Effectiveness of transcutaneous electrical nerve stimulation on postoperative pain with movement. *The journal of pain : official journal of the*  
19 *American Pain Society* 2003; **4**(8): 455-64.
- 20 288. Raket BA, Zimmerman MB, Geasland K, et al. Transcutaneous electrical nerve stimulation for the control of pain during rehabilitation after total knee arthroplasty:  
21 A randomized, blinded, placebo-controlled trial. *Pain* 2014; **155**(12): 2599-611.
- 22 289. Ramanathan D, Saleh A, Klika AK, Higuera CA, Barsoum WK. The Use of Transcutaneous Electrical Nerve Stimulation After Total Knee Arthroplasty: A  
23 Prospective Randomized Controlled Trial. *Surgical technology international* 2017; **30**: 425-34.
- 24 290. Ramos LAV, Callegari B, Franca FJR, et al. Comparison Between Transcutaneous Electrical Nerve Stimulation and Stabilization Exercises in Fatigue and  
25 Transversus Abdominis Activation in Patients With Lumbar Disk Herniation: A Randomized Study. *Journal of manipulative and physiological therapeutics* 2018; **41**(4):  
26 323-31.
- 27 291. Rani P, Kalyani V, Goyal T, Yadav R, Mishra R. Effect of Transcutaneous Electrical Nerve Stimulation Therapy on Pain and Functional Disability Level among  
28 Patients with Rotator Cuff Disease- a Randomized Controlled Trial. *International Journal of Physiotherapy* 2020; **7**(1): 7-13.
- 29 292. Ratajczak B, Hawrylak A, Demidaś A, Kuciel-Lewandowska J, Boerner E. Effectiveness of diadynamic currents and transcutaneous electrical nerve stimulation in  
30 disc disease lumbar part of spine. *Journal of Back & Musculoskeletal Rehabilitation* 2011; **24**(3): 155-9.
- 31 293. Rawat B, Genz A, Fache JS, Ong M, Coldman AJ, Burhenne HJ. Effectiveness of transcutaneous electrical nerve stimulation (TENS) for analgesia during biliary  
32 lithotripsy. *Invest Radiol* 1991; **26**(10): 866-9.
- 33 294. Renovato França FJ, Nogueira Burke T, Oliveira Magalhães M, et al. Motor Control Training Compared With Transcutaneous Electrical Nerve Stimulation in  
34 Patients With Disc Herniation With Associated Radiculopathy: A Randomized Controlled Trial. *American journal of physical medicine & rehabilitation* 2019; **98**(3): 207-14.
- 35 295. Reuss R, Cronen P, Abplanalp L. Transcutaneous electrical nerve stimulation for pain control after cholecystectomy: lack of expected benefits. *Southern medical*  
36 *journal* 1988; **81**(11): 1361-3.
- 37 296. Revadkar MT, Bhojwani TM. Comparison of the Effectiveness of Transcutaneous Electrical Nerve Stimulation (Tens) Vs. Interferential Therapy (Ift) for Relief of  
38 Pain in Primary Dysmenorrhea. *International Journal of Physiotherapy* 2019; **6**(6): 263-7.
- 39 297. Ringel G, Taubert K. Zur effektivitat der transkutanen elektrischen nervenstimulation bei migrane (The efficacy of transcutaneous nerve stimulation in migraine)  
40 [German]. *Zeitschrift fur Physiotherapie* 1991 Jan; **43**(1):8-11 1991.
- 41  
42  
43  
44  
45  
46



- 1  
2  
3 298. Robb KA, Newham DJ, Williams JE. Transcutaneous electrical nerve stimulation vs. transcutaneous spinal electroanalgesia for chronic pain associated with breast  
4 cancer treatments. *Journal of pain and symptom management* 2007; **33**(4): 410-9.
- 5 299. Robinson R, Darlow S, Wright SJ, et al. Is transcutaneous electrical nerve stimulation an effective analgesia during colonoscopy? *Postgraduate medical journal*  
6 2001; **77**(909): 445-6.
- 7 300. Roche PA, Gijsbers K, Belch JJ, Forbes CD. Modification of haemophilic haemorrhage pain by transcutaneous electrical nerve stimulation. *Pain* 1985; **21**(1): 43-8.
- 8 301. Rooney SM, Jain S, Goldiner PL. Effect of transcutaneous nervous stimulation on postoperative pain after thoracotomy. *Anesthesia and analgesia* 1983; **62**(11):  
9 1010-2.
- 10 302. Rosenberg M, Curtis L, Bourke D. Transcutaneous electrical nerve stimulation for the relief of postoperative pain. *Pain* 1978; **5**(2): 129-33.
- 11 303. Rutgers MJ, Van-Romunde L, Osman P. A small randomised comparative trial of acupuncture verses transcutaneous electrical neurostimulation in postherpetic  
12 neuralgia. *Pain Clinic* 1988; **2**: 87-9.
- 13 304. Sadala AY, Machado AFP, Liebano RE. Effects of transcutaneous electrical nerve stimulation on pain intensity during application of carboxytherapy in patients with  
14 cellulite: A randomized placebo-controlled trial. *Journal of cosmetic dermatology* 2018; **17**(6): 1175-81.
- 15 305. Sahin N, Albayrak I, Ugurlu H. Effect of different transcutaneous electrical stimulation modalities on cervical myofascial pain syndrome. *Journal of*  
16 *Musculoskeletal Pain* 2011; **19**(1): 18-23.
- 17 306. Samadzadeh S, Rezavand N, Yari M, Rezaei M, Faizmahdavi H, Hematti M. Comparison of Entonox and Transcutaneous Electrical Nerve Stim-ulation (TENS) in  
18 labor pain. *Journal of Medical and Biomedical Sciences* 2017; **6**(2): 11-6.
- 19 307. Sangtong K, Chupinijrobkob C, Putthakumnerd W, Kuptniratsaikul V. Does adding transcutaneous electrical nerve stimulation to therapeutic ultrasound affect pain  
20 or function in people with osteoarthritis of the knee? A randomized controlled trial. *Clinical rehabilitation* 2019; **33**(7): 1197-205.
- 21 308. Santamato A, Notarnicola A, Panza F, et al. SBOTE study: Extracorporeal shock wave therapy versus electrical stimulation after botulinum toxin type a injection for  
22 post-stroke spasticity-a prospective randomized trial. *Ultrasound in Medicine and Biology* 2013; **39**(2): 283-91.
- 23 309. Santana LS, Gallo RB, Ferreira CH, Duarte G, Quintana SM, Marcolin AC. Transcutaneous electrical nerve stimulation (TENS) reduces pain and postpones the  
24 need for pharmacological analgesia during labour: a randomised trial. *Journal of physiotherapy* 2016; **62**(1): 29-34.
- 25 310. Saranya B, Ahmed J, Shenoy N, Ongole R, Sujir N, Natarajan S. Comparison of Transcutaneous Electric Nerve Stimulation (TENS) and Microcurrent Nerve  
26 Stimulation (MENS) in the Management of Masticatory Muscle Pain: A Comparative Study. *Pain research & management* 2019; **2019**: 8291624.
- 27 311. Sayilir S, Yildizgoren MT. The medium-term effects of diadynamic currents in chronic low back pain; TENS versus diadynamic currents: a randomised, follow-up  
28 study. *Complementary therapies in clinical practice* 2017; **29**: 16-9.
- 29 312. Seo HG, Bang MS, Chung SG, Jung SH, Lee S-U. Effect of Electrical Stimulation on Botulinum Toxin A Therapy in Patients With Chronic Myofascial Pain  
30 Syndrome: A 16-Week Randomized Double-Blinded Study. *Archives of Physical Medicine & Rehabilitation* 2013; **94**(3): 412-8.
- 31 313. Serry ZMH, Mossa G, Elhabashy H, et al. Transcutaneous nerve stimulation versus aerobic exercise in diabetic neuropathy. *Egyptian Journal of Neurology,*  
32 *Psychiatry and Neurosurgery* 2016; **53**(2): 124-9.
- 33 314. Sezen CB, Akboga SA, Celik A, Kalafat CE, Tastepe AI. Transcutaneous electrical nerve stimulation effect on postoperative complications. *Asian cardiovascular &*  
34 *thoracic annals* 2017; **25**(4): 276-80.
- 35 315. Shahoei R, Shahghebi S, Rezaei M, Naqshbandi S. The effect of transcutaneous electrical nerve stimulation on the severity of labor pain among nulliparous women:  
36 A clinical trial. *Complementary therapies in clinical practice* 2017; **28**: 176-80.
- 37 316. Shehab D, Adham N. Comparative effectiveness of ultrasound and transcutaneous electrical stimulation in treatment of periarticular shoulder pain. *Physiother Can*  
38 2000; **52**(3): 208-14.
- 39 317. Sherry E, Kitchener P, Smart R. A prospective randomized controlled study of VAX-D and TENS for the treatment of chronic low back pain. *Neurological research*  
40 2001; **23**(7): 780-4.
- 41  
42  
43  
44  
45  
46

- 1  
2  
3 318. Shimoji K, Takahashi N, Nishio Y, Koyanagi M, Aida S. Pain relief by transcutaneous electric nerve stimulation with bidirectional modulated sine waves in patients  
4 with chronic back pain: a randomized, double-blind, sham-controlled study. *Neuromodulation* 2007 Jan;10(1):42-51 2007.
- 5 319. Shimoura K, Iijima H, Suzuki Y, Aoyama T. Immediate Effects of Transcutaneous Electrical Nerve Stimulation on Pain and Physical Performance in Individuals  
6 With Preradiographic Knee Osteoarthritis: A Randomized Controlled Trial. *Archives of Physical Medicine & Rehabilitation* 2019; **100**(2): 300-.
- 7 320. Shoukry RA, Al-Ansary AM. Transcutaneous Electric Nerve Stimulation (TENS) for pain relief during Extracorporeal Shock-Wave Lithotripsy (ESWL). *Egyptian  
8 Journal of Anaesthesia* 2019; **35**(1): 65-70.
- 9 321. Siemens W, Boehlke C, Bennett MI, Offner K, Becker G, Gaertner J. Transcutaneous electrical nerve stimulation for advanced cancer pain inpatients in specialist  
10 palliative care—a blinded, randomized, sham-controlled pilot cross-over trial. *Supportive Care in Cancer* 2020.
- 11 322. Sikiru L, Shmaila H, Muhammed SA. Transcutaneous electrical nerve stimulation (TENS) in the symptomatic management of chronic prostatitis/chronic pelvic pain  
12 syndrome: a placebo-control randomized trial. *International braz j urol : official journal of the Brazilian Society of Urology* 2008; **34**(6): 708-13; discussion 14.
- 13 323. Silva MB, de Melo PR, de Oliveira NM, Crema E, Fernandes LF. Analgesic effect of transcutaneous electrical nerve stimulation after laparoscopic cholecystectomy.  
14 *American journal of physical medicine & rehabilitation* 2012; **91**(8): 652-7.
- 15 324. Silva JG, Gonçalves Santana C, Inocência KR, Orsini M, Machado S, Bergmann A. Electrocortical Analysis of Patients with Intercostobrachial Pain Treated with  
16 TENS after Breast Cancer Surgery. *Journal of Physical Therapy Science* 2014; **26**(3): 349-53.
- 17 325. Sim DT. Effectiveness of transcutaneous electrical nerve stimulation following cholecystectomy. *Physiotherapy* 1991; **77**(10): 715-22.
- 18 326. Siqueira LTD, Ribeiro VV, Moreira PAM, Brasolotto AG, de Jesus Guirro RR, Alves Silverio KC. Effects of transcutaneous electrical nervous stimulation (TENS)  
19 associated with vocal therapy on musculoskeletal pain of women with behavioral dysphonia: A randomized, placebo-controlled double-blind clinical trial. *Journal of  
20 communication disorders* 2019; **82**: N.PAG.
- 21 327. Sloan JP, Muwanga CL, Waters EA, Dove AF, Dave SH. Multiple rib fractures: transcutaneous nerve stimulation versus conventional analgesia. *The Journal of  
22 trauma* 1986; **26**(12): 1120-2.
- 23 328. Smania N, Corato E, Fiaschi A, Pietropoli P, Aglioti SM, Tinazzi M. Repetitive magnetic stimulation: a novel therapeutic approach for myofascial pain syndrome.  
24 *Journal of neurology* 2005; **252**(3): 307-14.
- 25 329. Smedley F, Taube M, Wastell C. Transcutaneous electrical nerve stimulation for pain relief following inguinal hernia repair: a controlled trial. *European surgical  
26 research Europäische chirurgische Forschung Recherches chirurgicales europeennes* 1988; **20**(4): 233-7.
- 27 330. Smith C, Lewith G, Machin D. Preliminary study to establish a controlled method of assessing transcutaneous nerve stimulation as a treatment for the pain caused by  
28 osteoarthritis of the knee. *Physiotherapy* 1983; **69**: 266-8.
- 29 331. Smith C, Guralnick M, Gelfand M, Jeans M. The effects of transcutaneous electrical nerve stimulation on post-cesarean pain. *Pain* 1986; **27**(2): 181-93.
- 30 332. Sodipo JO, Adedeji SA, Olumide O. Postoperative pain relief by transcutaneous electrical nerve stimulation (TENS). *The American journal of Chinese medicine*  
31 1980; **8**(1-2): 190-4.
- 32 333. Solak O, Turna A, Pekcolaklar A, Metin M, Sayar A, Gurses A. Transcutaneous electric nerve stimulation for the treatment of postthoracotomy pain: a randomized  
33 prospective study. *The Thoracic and cardiovascular surgeon* 2007; **55**(3): 182-5.
- 34 334. Solak O, Emmiler M, Ela Y, et al. Comparison of continuous and intermittent transcutaneous electrical nerve stimulation in postoperative pain management after  
35 coronary artery bypass grafting: A randomized, placebo-controlled prospective study. *Heart Surgery Forum* 2009; **12**(5): E266-E71.
- 36 335. Sonde L, Gip C, Fernaeus SE, Nilsson CG, Viitanen M. Stimulation with low frequency (1.7 Hz) transcutaneous electric nerve stimulation (low-tens) increases  
37 motor function of the post-stroke paretic arm. *Scandinavian journal of rehabilitation medicine* 1998; **30**(2): 95-9.
- 38 336. Stepanovic A, Kolsek M, Kersnik J, Erculj V. Prevention of post-herpetic neuralgia using transcutaneous electrical nerve stimulation. *Wiener klinische  
39 Wochenschrift* 2015; **127**(9-10): 369-74.
- 40 337. Steptoe P, Bo JO. Pain-relieving effect of transcutaneous nerve stimulation during delivery. A study among primiparas. *Ugeskrift for laeger* 1984; **146**(42): 3186-8.
- 41 338. Stratton S, Smith M. Postoperative thoracotomy. Effect of transcutaneous electrical nerve stimulation on forced vital capacity. *Physical therapy* 1980; **60**(1): 45-7.
- 42  
43  
44  
45  
46

- 1  
2  
3 339. Stubbing JF, Jellicoe JA. Transcutaneous electrical nerve stimulation after thoracotomy. Pain relief and peak expiratory flow rate--a trial of transcutaneous electrical  
4 nerve stimulation. *Anaesthesia* 1988; **43**(4): 296-8.
- 5 340. Suh HR, Kim TH, Han GS. The Effects of High-Frequency Transcutaneous Electrical Nerve Stimulation for Dental Professionals with Work-Related  
6 Musculoskeletal Disorders: A Single-Blind Randomized Placebo-Controlled Trial. *Evidence-Based Complementary and Alternative Medicine* 2015.
- 7 341. Talbot LA, Solomon Z, Webb L, Morrell C, Metter EJ. Electrical Stimulation Therapies for Active Duty Military with Patellofemoral Pain Syndrome: A  
8 Randomized Trial. *Military medicine* 2020.
- 9 342. Tantawy SA, Kamel DM, Abdelbasset WK. Does transcutaneous electrical nerve stimulation reduce pain and improve quality of life in patients with idiopathic  
10 chronic orchialgia? A randomized controlled trial. *Journal of Pain Research* 2018; **11**: 77-82.
- 11 343. Taylor P, Hallett M, Flaherty L. Treatment of osteoarthritis of the knee with transcutaneous electrical nerve stimulation. *Pain* 1981; **11**(2): 233-40.
- 12 344. Taylor A, West B, Simon B, Skelton J, Rowlingson J. How effective is TENS for acute pain? *Am J Nurs* 1983; **83**(8): 1171-4.
- 13 345. Thakur R, Patidar RJJOGI. Comparative study of transcutaneous electrical nerve stimulation (TENS) and tramadol hydrochloride for pain relief in labor. 2004;  
14 **54**(4): 346-50.
- 15 346. Thomas IL, Tyle V, Webster J, Neilson A. An evaluation of transcutaneous electrical nerve stimulation for pain relief in labour. *The Australian & New Zealand*  
16 *journal of obstetrics & gynaecology* 1988; **28**(3): 182-9.
- 17 347. Thomas M, Lundeberg T, Bjork G, Lundstrom-Lindstedt V. Pain and discomfort in primary dysmenorrhea is reduced by preemptive acupuncture or low frequency  
18 TENS. *European Journal of Physical Medicine and Rehabilitation* 1995; **5**(3): 71-6.
- 19 348. Thorsteinsson G, Stonnington HH, Stillwell GK, Elveback LR. The placebo effect of transcutaneous electrical stimulation. *Pain* 1978; **5**(1): 31-41.
- 20 349. Tilak M, Isaac SA, Fletcher J, et al. Mirror Therapy and Transcutaneous Electrical Nerve Stimulation for Management of Phantom Limb Pain in Amputees - A  
21 Single Blinded Randomized Controlled Trial. *Physiotherapy research international : the journal for researchers and clinicians in physical therapy* 2016; **21**(2): 109-15.
- 22 350. Tokuda M, Tabira K, Masuda T, Nishiwada T, Shomoto K. Effect of modulated-frequency and modulated-intensity transcutaneous electrical nerve stimulation after  
23 abdominal surgery: a randomized controlled trial. *The Clinical journal of pain* 2014; **30**(7): 565-70.
- 24 351. Tonella RM, Araujo S, Da Silva AMO. Transcutaneous electrical nerve stimulation in the relief of pain related to physical therapy after abdominal surgery.  
25 [Portuguese, English]. *Revista brasileira de anestesiologia* 2006; **56**(6): 630-42.
- 26 352. Topuz O, Ozfidan E, Ozgen M, Ardic F. Efficacy of transcutaneous electrical nerve stimulation and percutaneous neuromodulation therapy in chronic low back pain.  
27 *Journal of back and musculoskeletal rehabilitation* 2004; **17**(3-4): 127-33.
- 28 353. Tosato J, Biasotto-Gonzalez D, Caria PJFP. Effect of massage therapy and of transcutaneous electrical nerve stimulation on pain and electromyographic activity in  
29 patients with temporomandibular dysfunction. 2007; **14**: 21-6.
- 30 354. Treacy K. Awareness/relaxation training and transcutaneous electrical neural stimulation in the treatment of bruxism. *Journal of oral rehabilitation* 1999; **26**(4):  
31 280-7.
- 32 355. Tsen LC, Thomas J, Segal S, Datta S, Bader AM. Transcutaneous electrical nerve stimulation does not augment combined spinal epidural labour analgesia.  
33 *Canadian journal of anaesthesia = Journal canadien d'anesthesie* 2000; **47**(1): 38-42.
- 34 356. Tsen LC, Thomas J, Segal S, Datta S, Bader AM. Transcutaneous electrical nerve stimulation does not augment epidural labor analgesia. *Journal of clinical*  
35 *anesthesia* 2001; **13**(8): 571-5.
- 36 357. Tsukayama H, Yamashita H, Amagai H, Tanno Y. Randomised controlled trial comparing the effectiveness of electroacupuncture and TENS for low back pain: a  
37 preliminary study for a pragmatic trial. *Acupuncture in medicine : journal of the British Medical Acupuncture Society* 2002; **20**(4): 175-80.
- 38 358. Tucker DL, Rockett M, Hasan M, Poplar S, Rule SA. Does transcutaneous electrical nerve stimulation (TENS) alleviate the pain experienced during bone marrow  
39 sampling in addition to standard techniques? A randomised, double-blinded, controlled trial. *Journal of clinical pathology* 2015; **68**(6): 479-83.
- 40 359. Tugay N, Akbayrak T, Demirturk F, et al. Effectiveness of transcutaneous electrical nerve stimulation and interferential current in primary dysmenorrhea. *Pain*  
41 *medicine (Malden, Mass)* 2007; **8**(4): 295-300.
- 42  
43  
44  
45  
46

- 1  
2  
3 360. Tulgar M, McGlone F, Bowsher D, Miles JB. Comparative effectiveness of different stimulation modes in relieving pain. Part I. A pilot study. *Pain* 1991; **47**(2):  
4 151-5.
- 5 361. Tulgar M, McGlone F, Bowsher D, Miles JB. Comparative effectiveness of different stimulation modes in relieving pain. Part II. A double-blind controlled long-  
6 term clinical trial. *Pain* 1991; **47**(2): 157-62.
- 7 362. Unterrainer AF, Friedrich C, Krenn MH, Piotrowski WP, Golaszewski SM, Hitzl W. Postoperative and preincisional electrical nerve stimulation TENS reduce  
8 postoperative opioid requirement after major spinal surgery. *Journal of neurosurgical anaesthesiology* 2010; **22**(1): 1-5.
- 9 363. Unterrainer AF, Uebleis FX, Gross FA, Werner GG, Krombholz MA, Hitzl W. TENS compared to opioids in postoperative analgesic therapy after major spinal  
10 surgery with regard to cognitive function. *Middle east journal of anaesthesiology* 2012; **21**(6): 815-21.
- 11 364. Upton GA, Tinley P, Al-Aubaidy H, Crawford R. The influence of transcutaneous electrical nerve stimulation parameters on the level of pain perceived by  
12 participants with painful diabetic neuropathy: A crossover study. *Diabetes & metabolic syndrome* 2017; **11**(2): 113-8.
- 13 365. Vaidya SM. Sacroiliac joint mobilisation versus transcutaneous electrical nerve stimulation for pregnancy induced posterior pelvic pain-a randomised clinical trial.  
14 *Journal of Clinical and Diagnostic Research* 2018; **12**(1): YC04-YC7.
- 15 366. Vaillancourt S, Coulombe-Lévêque A, Fradette J, et al. Combining transcutaneous electrical nerve stimulation with therapeutic exercise to reduce pain in an elderly  
16 population: a pilot study. *Disability and rehabilitation* 2019: 1-8.
- 17 367. Valenza MC, Torres-Sanchez I, Cabrera-Martos I, Valenza-Demet G, Cano-Cappellacci M. Acute Effects of Contract-Relax Stretching vs. TENS in Young Subjects  
18 With Anterior Knee Pain: A Randomized Controlled Trial. *Journal of strength and conditioning research* 2016; **30**(8): 2271-8.
- 19 368. van der Ploeg JM, Vervest HA, Liem AL, Schagen van Leeuwen JH. Transcutaneous nerve stimulation (TENS) during the first stage of labour: a randomized  
20 clinical trial. *Pain* 1996; **68**(1): 75-8.
- 21 369. van der Spank JT, Cambier DC, De\_Paeppe HM, Danneels LA, Witvrouw EE, Beerens L. Pain relief in labour by transcutaneous electrical nerve stimulation (TENS).  
22 *Archives of gynecology and obstetrics* 2000; **264**(3): 131-6.
- 23 370. Vance CG, Rakel BA, Blodgett NP, et al. Effects of transcutaneous electrical nerve stimulation on pain, pain sensitivity, and function in people with knee  
24 osteoarthritis: a randomized controlled trial. *Physical therapy* 2012; **92**(7): 898-910.
- 25 371. Vitalii C, Oleg P. The efficiency of transcutaneous electrical nerve stimulation in association with gabapentin in the treatment of neuropathic pain in patients with  
26 spinal cord injury. *Romanian Journal of Neurology/ Revista Romana de Neurologie* 2014; **13**(4): 193-6.
- 27 372. Vrouva S, Batistaki C, Paraskevaidou E, et al. Comparative study of pain relief in two non-pharmacological treatments in patients with partial rotator cuff tears: A  
28 randomized trial. *Anesthesiology and Pain Medicine* 2019; **9**(2).
- 29 373. Walker RH, Morris BA, Angulo DL, Schneider J, Colwell CW, Jr. Postoperative use of continuous passive motion, transcutaneous electrical nerve stimulation, and  
30 continuous cooling pad following total knee arthroplasty. *The Journal of arthroplasty* 1991; **6**(2): 151-6.
- 31 374. Wang SF, Lee JP, Hwa HL. Effect of transcutaneous electrical nerve stimulation on primary dysmenorrhea. *Neuromodulation : journal of the International  
32 Neuromodulation Society* 2009; **12**(4): 302-9.
- 33 375. Warfield CA, Stein JM, Frank HA. The effect of transcutaneous electrical nerve stimulation on pain after thoracotomy. *The Annals of thoracic surgery* 1985; **39**(5):  
34 462-5.
- 35 376. Warke K, Al-Smadi J, Baxter GD, Walsh DM, Lowe-Strong AS. A double blind, placebo controlled, randomised, clinical trial investigating the efficacy of  
36 transcutaneous electrical nerve stimulation for low back pain in a multiple sclerosis population. *Multiple Sclerosis* 2004; **10**(7032): S107-S.
- 37 377. Warke K, Al-Smadi J, Baxter D, Walsh D, Lowe-Strong A. Efficacy of transcutaneous electrical nerve stimulation (tens) for chronic low-back pain in a multiple  
38 sclerosis population: a randomized, placebo-controlled clinical trial. *Clinical Journal of Pain* 2006; **22**(9): 812-9.
- 39 378. Yameen F, Shahbaz NN, Hasan Y, Fauz R, Abdullah M. Efficacy of transcutaneous electrical nerve stimulation and its different modes in patients with trigeminal  
40 neuralgia. *JPMA The Journal of the Pakistan Medical Association* 2011; **61**(5): 437-9.
- 41  
42  
43  
44  
45  
46



- 1  
2  
3 379. Yesil H, Hepguler S, Dundar U, Taravati S, Isleten B. Does the Use of Electrotherapies Increase the Effectiveness of Neck Stabilization Exercises for Improving  
4 Pain, Disability, Mood, and Quality of Life in Chronic Neck Pain?: A Randomized, Controlled, Single-Blind Study. *Spine* 2018; **43**(20): E1174-e83.
- 5 380. Yilmaz M, Tarakci D, Tarakci E. Comparison of high-intensity laser therapy and combination of ultrasound treatment and transcutaneous nerve stimulation on  
6 cervical pain associated with cervical disc herniation: A randomized trial. *Complementary therapies in medicine* 2020; **49**: 102295.
- 7 381. Yilmazer M, Kose S, Arioz DT, Koken G, Ozbulut O. Efficacy of transcutaneous electrical nerve stimulation for pain relief in women undergoing office endometrial  
8 biopsy. *Archives of gynecology and obstetrics* 2012; **285**(4): 1059-64.
- 9 382. Yokoyama M, Sun X, Oku S, et al. Comparison of percutaneous electrical nerve stimulation with transcutaneous electrical nerve stimulation for long-term pain  
10 relief in patients with chronic low back pain. *Anesthesia and analgesia* 2004; **98**(6): 1552-6, table of contents.
- 11 383. Yoshimizu M, Teo AR, Ando M, Kiyohara K, Kawamura T. Relief of chronic shoulder and neck pain by electro-acupuncture and transcutaneous electrical nervous  
12 stimulation: A randomized crossover trial. *Medical Acupuncture* 2012; **24**(2): 97-103.
- 13 384. Yüksel M, Ayaş Ş, Cabioglu MT, Yilmaz D, Cabioglu C. Quantitative Data for Transcutaneous Electrical Nerve Stimulation and Acupuncture Effectiveness in  
14 Treatment of Fibromyalgia Syndrome. *Evidence-based Complementary and Alternative Medicine* 2019; **2019**.
- 15 385. Yurtkuran M, Kocagil T. TENS, electroacupuncture and ice massage: comparison of treatment for osteoarthritis of the knee. *American journal of acupuncture* 1999;  
16 **27**(3-4): 133-40.
- 17 386. Zakariaee SS, Shahoei R, Nosab LH, Moradi G, Farshbaf M. The Effects of Transcutaneous Electrical Nerve Stimulation on Post-Episiotomy Pain Severity in  
18 Primiparous Women: A Randomized, Controlled, Placebo Clinical Trial. *Galen Medical Journal* 2019; **8**: UNSP e1404.
- 19 387. Zhang Y, Zhang J, Wang L, Wang K, Svensson P. Effect of transcutaneous electrical nerve stimulation on jaw movement-evoked pain in patients with TMJ disc  
20 displacement without reduction and healthy controls. *Acta Odontologica Scandinavica* 2020; **78**(4): 309-20.
- 21 388. Zhou MM, Li F, Lu WB, Wu JF, Pei S. Efficiency of Neuromuscular Electrical Stimulation and Transcutaneous Nerve Stimulation on Hemiplegic Shoulder Pain: A  
22 Randomized Controlled Trial. *Archives of physical medicine and rehabilitation* 2018; **99**(9): 1730-9.
- 23  
24  
25  
26  
27  
28  
29  
30  
31  
32  
33  
34  
35  
36  
37  
38  
39  
40  
41  
42  
43  
44  
45  
46

# Comparison

## TENS vs Placebo (91 RCTs, N = 4841)

- Low RoB (15 RCTs, N = 1104)

- High RoB (76 RCTs, N = 3737)

- n>50 participants per group (8 RCTs, N = 1197)

- n<50 participants per group (83 RCTs, N = 3644)

## TENS vs No Treatment (10 RCTs, N = 602)

## TENS vs SoC treatments (61 RCTs, N = 3155)

- Exercise/Physiotherapy (25 RCTs, N = 1114)

- Medication (27 RCTs, N = 1420)

## High vs Low Frequency (13 RCTs, N = 468)

(\*HF = high frequency; LF = low frequency)

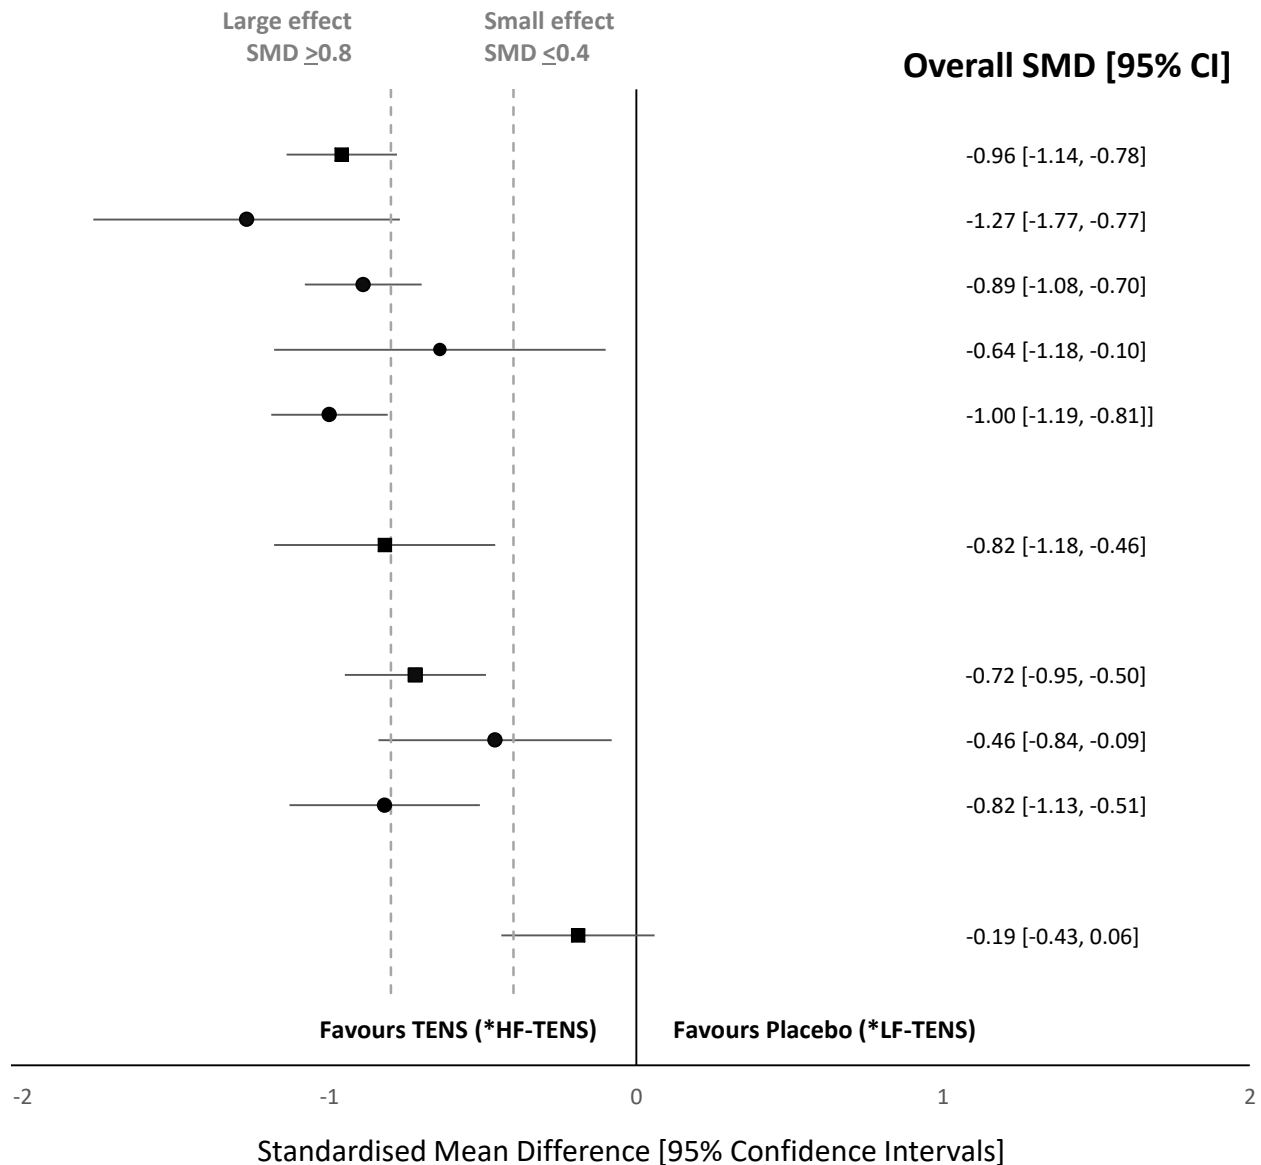



### Comparison

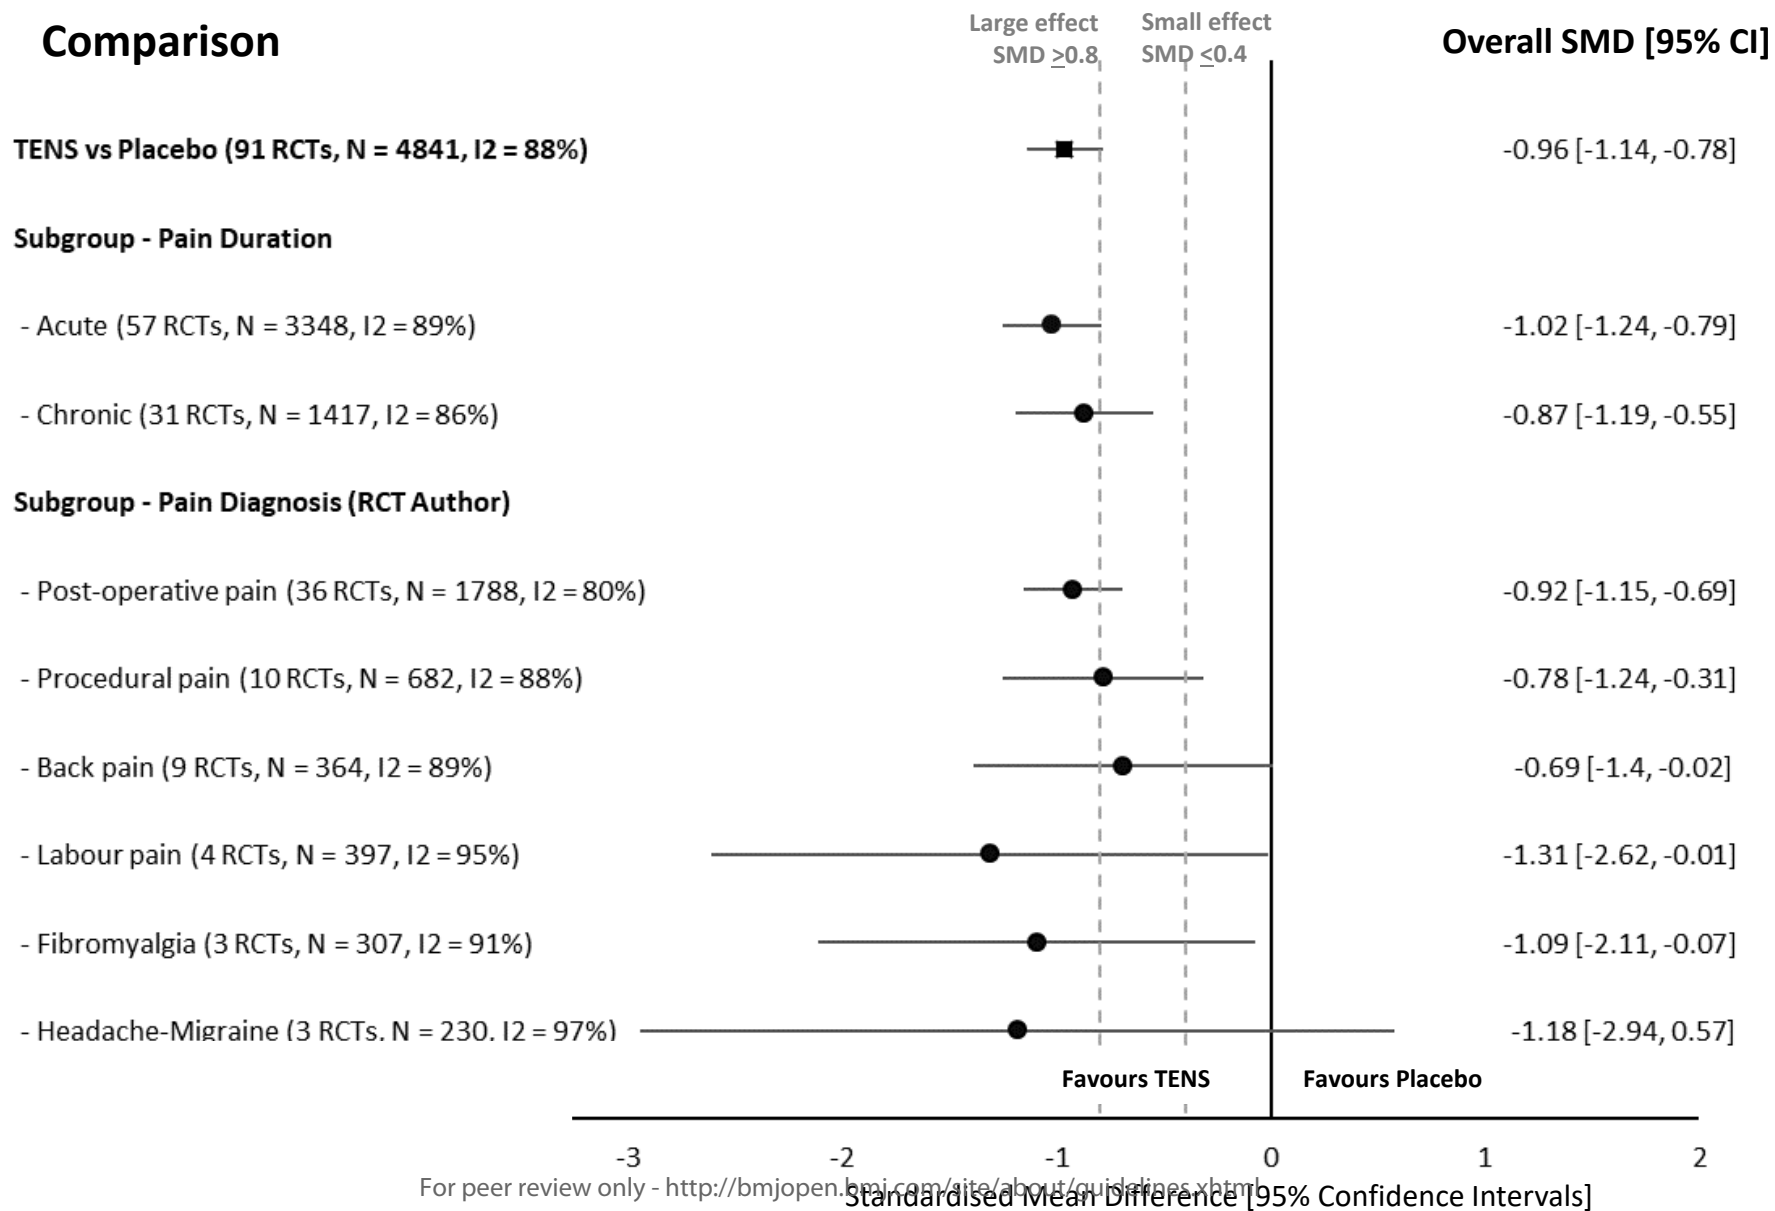

1  
2  
3  
4  
5  
6  
7  
8  
9  
10  
11  
12  
13  
14  
15  
16  
17  
18  
19  
20  
21  
22  
23  
24  
25  
26  
27  
28  
29  
30  
31  
32  
33  
34  
35  
36  
37  
38  
39  
40  
41

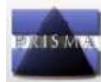

# PRISMA 2009 Checklist

| Section/topic                      | #  | Checklist item                                                                                                                                                                                                                                                                                              | Reported on page # |
|------------------------------------|----|-------------------------------------------------------------------------------------------------------------------------------------------------------------------------------------------------------------------------------------------------------------------------------------------------------------|--------------------|
| <b>TITLE</b>                       |    |                                                                                                                                                                                                                                                                                                             |                    |
| Title                              | 1  | Identify the report as a systematic review, meta-analysis, or both.                                                                                                                                                                                                                                         | 1                  |
| <b>ABSTRACT</b>                    |    |                                                                                                                                                                                                                                                                                                             |                    |
| Structured summary                 | 2  | Provide a structured summary including, as applicable: background; objectives; data sources; study eligibility criteria, participants, and interventions; study appraisal and synthesis methods; results; limitations; conclusions and implications of key findings; systematic review registration number. | 2                  |
| <b>INTRODUCTION</b>                |    |                                                                                                                                                                                                                                                                                                             |                    |
| Rationale                          | 3  | Describe the rationale for the review in the context of what is already known.                                                                                                                                                                                                                              | 3                  |
| Objectives                         | 4  | Provide an explicit statement of questions being addressed with reference to participants, interventions, comparisons, outcomes, and study design (PICOS).                                                                                                                                                  | 3                  |
| <b>METHODS</b>                     |    |                                                                                                                                                                                                                                                                                                             |                    |
| Protocol and registration          | 5  | Indicate if a review protocol exists, if and where it can be accessed (e.g., Web address), and, if available, provide registration information including registration number.                                                                                                                               | 3                  |
| Eligibility criteria               | 6  | Specify study characteristics (e.g., PICOS, length of follow-up) and report characteristics (e.g., years considered, language, publication status) used as criteria for eligibility, giving rationale.                                                                                                      | 3                  |
| Information sources                | 7  | Describe all information sources (e.g., databases with dates of coverage, contact with study authors to identify additional studies) in the search and date last searched.                                                                                                                                  | 3                  |
| Search                             | 8  | Present full electronic search strategy for at least one database, including any limits used, such that it could be repeated.                                                                                                                                                                               | 3                  |
| Study selection                    | 9  | State the process for selecting studies (i.e., screening, eligibility, included in systematic review, and, if applicable, included in the meta-analysis).                                                                                                                                                   | 3                  |
| Data collection process            | 10 | Describe method of data extraction from reports (e.g., piloted forms, independently, in duplicate) and any processes for obtaining and confirming data from investigators.                                                                                                                                  | 3                  |
| Data items                         | 11 | List and define all variables for which data were sought (e.g., PICOS, funding sources) and any assumptions and simplifications made.                                                                                                                                                                       | 4                  |
| Risk of bias in individual studies | 12 | Describe methods used for assessing risk of bias of individual studies (including specification of whether this was done at the study or outcome level), and how this information is to be used in any data synthesis.                                                                                      | 4                  |
| Summary measures                   | 13 | State the principal summary measures (e.g., risk ratio, difference in means).                                                                                                                                                                                                                               | 4                  |
| Synthesis of results               | 14 | Describe the methods of handling data and combining results of studies, if done, including measures of consistency (e.g., I <sup>2</sup> ) for each meta-analysis.                                                                                                                                          | 4                  |

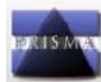

# PRISMA 2009 Checklist

Page 1 of 2

| Section/topic                 | #  | Checklist item                                                                                                                                                                                           | Reported on page # |
|-------------------------------|----|----------------------------------------------------------------------------------------------------------------------------------------------------------------------------------------------------------|--------------------|
| Risk of bias across studies   | 15 | Specify any assessment of risk of bias that may affect the cumulative evidence (e.g., publication bias, selective reporting within studies).                                                             | 4                  |
| Additional analyses           | 16 | Describe methods of additional analyses (e.g., sensitivity or subgroup analyses, meta-regression), if done, indicating which were pre-specified.                                                         | 4                  |
| <b>RESULTS</b>                |    |                                                                                                                                                                                                          |                    |
| Study selection               | 17 | Give numbers of studies screened, assessed for eligibility, and included in the review, with reasons for exclusions at each stage, ideally with a flow diagram.                                          | 5                  |
| Study characteristics         | 18 | For each study, present characteristics for which data were extracted (e.g., study size, PICOS, follow-up period) and provide the citations.                                                             | 5                  |
| Risk of bias within studies   | 19 | Present data on risk of bias of each study and, if available, any outcome level assessment (see item 12).                                                                                                | 5                  |
| Results of individual studies | 20 | For all outcomes considered (benefits or harms), present, for each study: (a) simple summary data for each intervention group (b) effect estimates and confidence intervals, ideally with a forest plot. | 5                  |
| Synthesis of results          | 21 | Present results of each meta-analysis done, including confidence intervals and measures of consistency.                                                                                                  | 6                  |
| Risk of bias across studies   | 22 | Present results of any assessment of risk of bias across studies (see Item 15).                                                                                                                          | 6                  |
| Additional analysis           | 23 | Give results of additional analyses, if done (e.g., sensitivity or subgroup analyses, meta-regression [see Item 16]).                                                                                    | 6                  |
| <b>DISCUSSION</b>             |    |                                                                                                                                                                                                          |                    |
| Summary of evidence           | 24 | Summarize the main findings including the strength of evidence for each main outcome; consider their relevance to key groups (e.g., healthcare providers, users, and policy makers).                     | 6                  |
| Limitations                   | 25 | Discuss limitations at study and outcome level (e.g., risk of bias), and at review-level (e.g., incomplete retrieval of identified research, reporting bias).                                            | 6-7                |
| Conclusions                   | 26 | Provide a general interpretation of the results in the context of other evidence, and implications for future research.                                                                                  | 7                  |
| <b>FUNDING</b>                |    |                                                                                                                                                                                                          |                    |
| Funding                       | 27 | Describe sources of funding for the systematic review and other support (e.g., supply of data); role of funders for the systematic review.                                                               | 3                  |

From: Moher D, Liberati A, Tetzlaff J, Altman DG, The PRISMA Group (2009). Preferred Reporting Items for Systematic Reviews and Meta-Analyses: The PRISMA Statement. PLoS Med 6(7): e1000097. doi:10.1371/journal.pmed1000097

For more information, visit: [www.prisma-statement.org](http://www.prisma-statement.org).

Page 2 of 2

For peer review only - <http://bmjopen.bmj.com/site/about/guidelines.xhtml>

# BMJ Open

## Efficacy and Safety of Transcutaneous Electrical Nerve Stimulation (TENS) for Acute and Chronic Pain: A systematic review and meta-analysis (The Meta-TENS study)

|                                 |                                                                                                                                                                                                                                                                                                                                                                                                                                                                               |
|---------------------------------|-------------------------------------------------------------------------------------------------------------------------------------------------------------------------------------------------------------------------------------------------------------------------------------------------------------------------------------------------------------------------------------------------------------------------------------------------------------------------------|
| Journal:                        | <i>BMJ Open</i>                                                                                                                                                                                                                                                                                                                                                                                                                                                               |
| Manuscript ID                   | bmjopen-2021-051073.R1                                                                                                                                                                                                                                                                                                                                                                                                                                                        |
| Article Type:                   | Original research                                                                                                                                                                                                                                                                                                                                                                                                                                                             |
| Date Submitted by the Author:   | 11-Oct-2021                                                                                                                                                                                                                                                                                                                                                                                                                                                                   |
| Complete List of Authors:       | Johnson, Mark; Leeds Beckett University, Centre for Pain Research<br>Paley, C; Leeds Beckett University, Centre for Pain Research; Airedale NHS Foundation Trust, Research & Development<br>Jones, Gareth; Leeds Beckett University, Centre for Pain Research<br>Mulvey, Matthew; University of Leeds, Leeds Institute of Health Sciences<br>Wittkopf, Priscilla; Leeds Beckett University, Centre for Pain Research; Aalborg University, Center for Neuroplasticity and Pain |
| <b>Primary Subject Heading</b>: | Complementary medicine                                                                                                                                                                                                                                                                                                                                                                                                                                                        |
| Secondary Subject Heading:      | Evidence based practice, Anaesthesia, Neurology, Nursing, Rehabilitation medicine                                                                                                                                                                                                                                                                                                                                                                                             |
| Keywords:                       | PAIN MANAGEMENT, REHABILITATION MEDICINE, COMPLEMENTARY MEDICINE, NEUROLOGY, Pain management < ANAESTHETICS                                                                                                                                                                                                                                                                                                                                                                   |
|                                 |                                                                                                                                                                                                                                                                                                                                                                                                                                                                               |

SCHOLARONE™  
Manuscripts



I, the Submitting Author has the right to grant and does grant on behalf of all authors of the Work (as defined in the below author licence), an exclusive licence and/or a non-exclusive licence for contributions from authors who are: i) UK Crown employees; ii) where BMJ has agreed a CC-BY licence shall apply, and/or iii) in accordance with the terms applicable for US Federal Government officers or employees acting as part of their official duties; on a worldwide, perpetual, irrevocable, royalty-free basis to BMJ Publishing Group Ltd ("BMJ") its licensees and where the relevant Journal is co-owned by BMJ to the co-owners of the Journal, to publish the Work in this journal and any other BMJ products and to exploit all rights, as set out in our [licence](#).

The Submitting Author accepts and understands that any supply made under these terms is made by BMJ to the Submitting Author unless you are acting as an employee on behalf of your employer or a postgraduate student of an affiliated institution which is paying any applicable article publishing charge ("APC") for Open Access articles. Where the Submitting Author wishes to make the Work available on an Open Access basis (and intends to pay the relevant APC), the terms of reuse of such Open Access shall be governed by a Creative Commons licence – details of these licences and which [Creative Commons](#) licence will apply to this Work are set out in our licence referred to above.

Other than as permitted in any relevant BMJ Author's Self Archiving Policies, I confirm this Work has not been accepted for publication elsewhere, is not being considered for publication elsewhere and does not duplicate material already published. I confirm all authors consent to publication of this Work and authorise the granting of this licence.

1  
2  
3 Efficacy and Safety of Transcutaneous Electrical Nerve Stimulation (TENS) for Acute and Chronic  
4 Pain: A systematic review and meta-analysis (The Meta-TENS study)  
5  
6  
7

### 8 **Investigating Team**

9 Mark I. Johnson, PhD1

10 Carole A. Paley, PhD1,2

11 Gareth Jones, PhD1

12 Matthew R. Mulvey, PhD 3

13 Priscilla G. Wittkopf, PhD 1,4  
14  
15

### 16 **Affiliations**

17  
18 1. Centre for Pain Research, School of Clinical and Applied Sciences, Leeds Beckett University, Leeds,  
19 U.K.

20 2. Research & Development Dept. Airedale NHS Foundation Trust, Steeton, Keighley, U.K.

21 3. Academic Unit of Primary and Palliative Care, Leeds Institute of Health Sciences, University of  
22 Leeds, Leeds U.K.

23 4. Center for Neuroplasticity and Pain, Dept. of Health Science and Technology, Aalborg University,  
24 Aalborg, Denmark.  
25  
26

### 27 **Corresponding Author**

28 Professor Mark I Johnson, PhD

29 Professor of Pain and Analgesia

30 Director of the Centre for Pain Research

31 School of Clinical and Applied Sciences

32 Portland Building

33 Leeds Beckett University

34 Leeds, U.K.

35 +441138123083

36 e-mail: [m.johnson@leedsbeckett.ac.uk](mailto:m.johnson@leedsbeckett.ac.uk)  
37  
38

### 39 **ORCID iDs**

40 Professor Mark I Johnson [http:// orcid. org/ 0000- 0002- 9421- 9622](http://orcid.org/0000-0002-9421-9622)

41 Dr Carole A Paley [http://orcid.org/ 0000-0002-6335-2666](http://orcid.org/0000-0002-6335-2666)

42 Dr Gareth Jones <https://orcid.org/0000-0002-0313-0092>

43 Dr Mathew R. Mulvey <https://orcid.org/0000-0002-6357-3848>

44 Dr Priscilla G Wittkopf [http:// orcid. org/ 0000-0002-2957-6156](http://orcid.org/0000-0002-2957-6156)  
45  
46  
47  
48  
49  
50  
51  
52  
53  
54  
55  
56  
57  
58  
59  
60



## ABSTRACT

### Objective

To investigate the efficacy and safety of transcutaneous electrical nerve stimulation (TENS) for relief of pain.

### Design

Systematic review and meta-analysis.

### Data Sources

Medline, Cochrane Central, Embase (and others) from inception to July 2019 and updated on 17 May 2020.

### Eligibility criteria for study selection

Randomised controlled trials (RCTs) comparing strong non-painful TENS at or close to the site of pain versus placebo or other treatments in adults with pain, irrespective of diagnosis.

### Data extraction and synthesis

Reviewers independently screened, extracted data, and assessed risk of bias (RoB, Cochrane tool), and certainty of evidence (GRADE). Mean pain intensity and proportions of participants achieving reductions of pain intensity ( $\geq 30\%$  or  $\geq 50\%$ ) during or immediately after TENS. Random effects models were used to calculate standardised mean differences (SMD) and risk ratios (RR). Subgroup analyses were related to trial methodology and characteristics of pain.

### Results

The review included 381 RCTs (24532 participants). Pain intensity was lower during or immediately after TENS compared with placebo (91 RCTs, 92 samples,  $n = 4841$ ,  $SMD = -0.96$  [95% CI,  $-1.14$ ,  $-0.78$ ]). Methodological (e.g., RoB, sample size) and pain characteristics (e.g., acute vs chronic, diagnosis) did not modify the effect. Pain intensity was lower during or immediately after TENS compared with pharmacological and non-pharmacological treatments used as part of standard of care (61 RCTs, 61 samples,  $n = 3155$ ,  $SMD = -0.72$  [95% CI,  $-0.95$ ,  $-0.50$ ]). Levels of evidence were downgraded because of small sized trials contributing to imprecision in magnitude estimates. Data was limited for other outcomes including adverse events which were poorly reported, generally mild, and not different to comparators.

### Conclusion

There was moderate-certainty evidence that pain intensity is lower during or immediately after TENS compared with placebo and without serious adverse events.

### Systematic review registration

PROSPERO - CRD42019125054

### Keywords

Transcutaneous electrical nerve stimulation (TENS), Pain management, Therapeutic neuromodulation, Meta-analysis

### Strengths and limitations of this study

- This meta-analysis is the first to pool data from pain irrespective of diagnosis, and meets 'rule of thumb' threshold standards for pooling pain data for meta-analysis (i.e.,  $\geq 500$  participants per trial arm)
- Effect sizes were calculated during or immediately after strong non-painful TENS because this is ecologically valid, and overcomes problems of analysing data gathered from a wide variety of TENS regimens, such as PRN, where participants are using TENS intermittently
- There was a preponderance of small sample sized studies, so a judicious approach was taken in interpretation of findings
- Sub-group analyses were used to explore statistical heterogeneity and the effect of combining different types of pain; the trim and fill method was used to explore publication bias
- GRADE criteria were used to judge the impact of risk of bias, imprecision, inconsistency, indirectness, and publication bias on the certainty of effect size estimates

For peer review only

## BACKGROUND

Pain is a global health problem with negative consequences for patients, society, and health care systems [1,2]. Transcutaneous electrical nerve stimulation (TENS) is used throughout the world for symptomatic relief of pain, supported by physiological evidence that TENS inhibits the activity and excitability of central nociceptive transmission neurons, irrespective of diagnosis (for review see [3]). In most countries TENS equipment and accessories are available without prescription; running costs and follow-up clinical support for TENS is inexpensive. Treatment can be self-administered without fear of toxicity, potentially offering symptomatic relief of pain throughout the day.

Uncertainty about the clinical efficacy of TENS has fuelled a longstanding debate as to whether TENS should be offered to patients in public health systems (e.g., within the National Health Service in the U.K.), or covered by private healthcare insurance (e.g., by the Center for Medicare Services in the USA). Clinicians and policy makers are confused about the benefits and harm associated with TENS, and clinical practice guidelines are inconsistent. In 2021, the National Institute of Health and Care Excellence (NICE) released guidance for the management of chronic pain in over 16s that recommends not to offer TENS [4]. The NICE does not recommend TENS for intrapartum care [5] or non-specific chronic low back pain [6] but does recommend TENS as an adjunct for osteoarthritis [7] and rheumatoid arthritis [8]. These guidelines are organised according to a traditional-pathology based classification of pain. This restricts the quantity of RCTs included for evaluation, despite many of these conditions having commonalities in the way that pain presents. Moreover, there is strong evidence that TENS acts via non-specific therapeutic neuromodulation irrespective of pathology, and that the lived experience of pain and response to pain relieving interventions results from a complex interplay of biopsychosocial factors (for review see [3]).

The debate about the efficacy of TENS has been ongoing since the 1970s, despite the publication of more than 350 RCTs [9]. A comprehensive appraisal of literature identified 169 systematic reviews, including Cochrane reviews, and at least 49 meta-analyses of TENS for specific pain conditions [10]. Most reviews are inconclusive due to insufficient pooled data. A recent overview of eight Cochrane reviews on TENS for chronic pain analysed 51 RCTs (2895 participants) and was inconclusive, with reviewers reluctant to pool data for meta-analysis because of clinical heterogeneity [11]. There is an absence of convincing or consistent evidence that TENS outcome is related to pathology, pain characteristics, medical diagnoses, or clinical context [9,12].

1  
2  
3 It seems logical to evaluate efficacy from a phenomenological perspective, i.e., by pooling pain  
4 intensity data irrespective of medical condition. This would increase the likelihood of exceeding  
5 thresholds for adequacy of pooled data. The intention of TENS is to provide symptomatic relief of  
6 pain and discomfort 'in-the-moment', so it would be ecologically valid to evaluate outcomes during  
7 or immediately after a single strong non-painful TENS treatment. Assessing TENS at a single time  
8 point would mitigate for heterogeneity associated with variable treatment schedules used in RCTs.  
9 Clinical heterogeneity associated with combining pain conditions arising from different pathologies  
10 and settings can be explored through subgroup analyses. Concerns about the impact of risk of bias,  
11 imprecision, inconsistency, indirectness, and publication bias can be assessed using GRADE criteria.  
12 To date, there has been no attempt to undertake a meta-analysis of this nature, possibly because of  
13 the enormity of the task.

14  
15  
16  
17  
18  
19  
20  
21  
22  
23 The aim of our systematic review and meta-analysis was to evaluate the efficacy and safety of TENS  
24 for pain, irrespective of medical diagnoses in adults.

## 25 26 27 28 **METHODS**

29  
30 This systematic review and meta-analysis were conducted and reported in accordance with  
31 guidelines from the Cochrane Collaboration of Systematic Reviews; Grading and Recommendations,  
32 Assessment, Development and Evaluation (GRADE) and the Preferred Reporting Items for Systematic  
33 Review and Meta-analysis (PRISMA). The study was registered on PROSPERO (CRD42019125054) and  
34 the protocol published (<https://bmjopen.bmj.com/content/9/10/e029999>)[13]. Ethical approval for  
35 the review was granted by Leeds Beckett University (Application Ref: 78097). See supplementary file  
36 1 for full details of search strategy, eligibility screening, data extraction, and analysis.

### 37 38 39 40 41 42 43 **Search strategy and selection criteria**

44  
45 One reviewer (PGW) searched electronic databases (Medline, Embase, Cochrane Central, CINAHL,  
46 PsycINFO, LILACS, PEDRO, Web of Science, AMED, SPORTDiscus) from inception to July 2019 and  
47 updated on 17 May 2020, for full text publications of randomised controlled trials (RCTs) and for  
48 systematic reviews that evaluated TENS for adults with clinical pain versus:

- 49 • placebo (e.g., sham (no current) TENS device)
- 50 • no treatment or waiting list control
- 51 • standard of care (SoC) and
- 52 • other treatment, both pharmacological and non-pharmacological.

53  
54  
55  
56  
57  
58  
59 There were no language restrictions and articles were translated where possible.

### **Types of TENS interventions**

The TENS intervention was defined as pulsed electrical currents generated by a 'standard TENS device' administered across the intact surface of the skin using surface electrodes at the site of pain or over nerve bundles proximal (or near) to the site of pain, with the intention of stimulating peripheral nerves to alleviate pain [3]. We included any type of pulse pattern and excluded pulse frequencies >250 pulses per second (pps), pulse durations >500 microseconds ( $\mu$ s) and peak-to-peak amplitudes >60 milliamperes (mA).

We included TENS administered by a therapist and/or participant; as a sole treatment or in combination with other treatments, for any duration or regularity of treatment; as a single or multiple treatment intervention with or without follow-up. However, we only extracted data for the measurement timepoint during or immediately after a TENS treatment, as this is the most ecologically valid outcome (see Introduction). We considered participant-reported strong but comfortable TENS sensations as optimal and used this as our primary TENS comparison group. We excluded RCTs evaluating non-painful outcomes (e.g., bladder dysfunction, constipation, dementia), or administering TENS at acupuncture points (unless over nerve bundles at the site of pain), using probes or electrode arrays, or using TENS-like currents (e.g., interferential current, microcurrent).

Two review authors (PGW and MIJ) independently screened titles, abstracts, and full texts, and extracted trial characteristics and numerical data. Disagreements were resolved by consensus with a third review author as arbiter (CAP or GJ). Records were not anonymised before assessment. Reasons for exclusion were coded and tabulated. The characteristics of included trials were extracted and tabulated including design, sample population, TENS intervention, comparator(s), and outcome measures. Decisions, trial characteristics and codes for analyses were documented in Excel spreadsheets.

### **Types of outcome measures**

Pain outcomes were mean (continuous data) patient-reported intensity of spontaneous or evoked pain (at rest or on movement) using standard subjective scales (e.g., numerical rating scale (NRS) or visual analogue scale (VAS)), and the proportion of participants reporting a reduction in pain intensity of  $\geq 30\%$  (moderate) or  $\geq 50\%$  (substantial) relative to baseline [14]. A between-group difference of  $\geq 10$  mm on a 100 mm VAS was set as the threshold for clinical importance in-line with IMMPACT criteria [15].

1  
2  
3  
4  
5 For standardised mean difference (SMD) we used 'Rules of thumb' based on Cohen's d [16,17] for  
6 interpreting effect sizes as follows:  
7

- 8 •  $<0.4$  = small effect
- 9
- 10 •  $0.4 < 0.7$  = moderate effect
- 11
- 12 •  $\geq 0.7$  = large effect
- 13

14 We considered a SMD of 0.5 as a rule of thumb for an important difference [17]. We were mindful  
15 that interpretations of this nature can be problematic due a variety of factors including settings and  
16 context in which pain was evaluated.  
17

18  
19  
20 We only extracted data at the last during TENS timepoint (i.e., whilst TENS was switched on) or the  
21 first timepoint immediately after TENS had been switched off. If TENS was administered as a course  
22 of treatments, we extracted data from the last treatment session.  
23  
24

25  
26  
27 We analysed the proportion of participants experiencing an adverse event, irrespective of severity.  
28 We only extracted data as 'zero' when the RCT report included numerical data for the presence of at  
29 least one adverse event in one of the trial arms and clearly stated that no adverse events had  
30 occurred in the other trial arm(s).  
31  
32

### 33 34 35 **Evaluation of TENS Effects**

36 Full details of the process used to categorise comparators is provided in supplementary file 1  
37  
38

#### 39 40 *TENS versus Placebo*

41 We included any type of placebo TENS and conducted a subgroup analysis of the different types of  
42 approaches such as sham devices with no electrical current or pulses of current that fade to 0mA  
43 within one minute. We considered the use of a sham TENS device coupled with appropriate briefing  
44 information as an adequate method of blinding.  
45  
46  
47

#### 48 49 50 *TENS versus No treatment or waiting list control*

51 We considered an intervention as 'no treatment' if we were confident that participants did not  
52 receive any other 'active' treatment. Comparators described as 'controls' were not included if  
53 patients were taking any type of active treatment, including *ad hoc* non-prescriptive medication or  
54 advise to undertake regular exercises. RCTs that compared TENS in combination with a  
55  
56  
57  
58  
59  
60



1  
2  
3 pharmacological agent versus a control consisting of the pharmacological agent on its own were not  
4 included in this analysis.  
5  
6  
7

#### 8 *TENS versus standard of care (SoC) comparators*

9  
10 We considered an intervention as 'standard of care' when trial authors described the intervention(s)  
11 to be fully or part of 'common', 'routine', or 'standard' practice and/or care. Thus, comparisons were  
12 either TENS compared head-to-head with a SoC intervention (i.e., TENS vs SoC) or TENS as an  
13 adjunct to a SoC intervention (i.e., TENS combined with SoC vs SoC alone). If a study had more than  
14 one treatment comparator, we planned to select only one comparator for meta-analysis to avoid  
15 unit-of-analysis errors, although there were no instances of this.  
16  
17  
18  
19  
20

#### 21 *TENS versus other treatment comparators*

22  
23 This analysis compared TENS with another treatment that had not been categorised as SoC. There  
24 was a variety of other treatment comparators and instances of studies with multiple treatment  
25 comparators. We produced a Forest plot for visual inspection but did not undertake a subgroup  
26 analysis because this would violate criteria for unit of analysis (i.e., double counting of primary TENS  
27 group data). None of these other treatment subgroups met our criteria for adequate sample size in  
28 treatment arms.  
29  
30  
31  
32  
33

#### 34 **Data analysis**

35  
36 Meta-analyses were conducted using Review Manager 5.3 and Stata 16 software. We calculated  
37 standardised mean difference (SMD) for continuous data and risk ratio (RR) for dichotomous data.  
38 Pre-specified criteria were used to select the primary TENS comparison and we did not enter several  
39 interventions into the same meta-analysis to avoid 'double-counting' and unit-of-analysis errors. We  
40 used an intention-to-treat analysis and combined data from first and second periods in cross-over  
41 trials because there was sufficient washout between interventions to eliminate contamination. We  
42 produced Forest plots for visual inspection and calculated overall treatment effect sizes when there  
43 were at least 100 data points in both trial arms pooled from at least two RCTs. Data was considered  
44 imprecise if the TENS treatment arm was below 500 participants for pooled data or below 200  
45 participants for a single RCT [18].  
46  
47  
48  
49  
50  
51  
52  
53  
54

55 Two review authors (CAP and MIJ) independently assessed risk of bias (RoB) using the Cochrane tool.  
56 We examined heterogeneity using visual inspection of forest plots, the  $I^2$  statistic, the  $\text{Chi}^2$  test and  
57 the Cochrane Collaboration's rough guide to interpretation. Small study effects were analysed using  
58  
59  
60

1  
2  
3 Egger's regression test (p-value set at  $\leq 0.1$ ), and the Trim and Fill method was used to analyse  
4 potential publication bias.  
5  
6  
7

8 Pre-specified subgroup analyses were related to  
9

- 10 • trial methodology e.g., overall risk of bias, trial arm sample size, and access to other  
11 treatments
- 12 • characteristics of pain e.g., duration - acute vs chronic, medical diagnosis - pain conditions,  
13 mechanistic descriptors - nociceptive or neuropathic, and systems or organs involved –  
14 musculoskeletal, visceral, somatosensory; and
- 15 • characteristics of TENS and comparators e.g., high versus low frequency TENS, types of  
16 placebos, and types of SoC.  
17  
18  
19  
20  
21  
22

23 Eligibility criteria had optimised TENS technique by excluding RCTs that did not deliver TENS above  
24 sensory detection threshold or close to the site of pain, making subgroup analyses of optimal versus  
25 suboptimal intensity or site of stimulation impossible. There were insufficient data to undertake  
26 subgroup analyses of conventional versus acupuncture-like TENS.  
27  
28  
29

30  
31 We interpreted subgroup analyses by considering: a p-value of  $\leq 0.1$  to indicate a statistically  
32 significant subgroup effect (interaction); the direction of each subgroup effect (i.e. qualitative or  
33 quantitative); and the extent to which individual trials differed in treatment effects within each  
34 subgroup (i.e. heterogeneity), in-line with Richardson et al. [19]. We evaluated the certainty of  
35 evidence using the GRADE system (GRADEpro GDT 2015, <https://gradepro.org/>)[20].  
36  
37  
38  
39

40  
41 Full details about the principles and operational procedures of subgroup analyses and GRADE  
42 assessments, including interpreting the findings, are provided in supplementary file 1.  
43  
44  
45

46  
47 Patient and public involvement

48 There was no patient or public involvement in any aspect of this study or its write-up.  
49  
50

## 51 **RESULTS**

52 Our searches yielded 7679 records (Figure 1). After removal of duplicates, we screened 5747 records  
53 and reviewed 623 full text reports of which 381 RCTs were included (383 samples, 24532  
54 participants, 334 parallel-group, see supplementary file 2 for characteristics of included studies) and  
55 19 RCTs are awaiting classification (supplementary file 3 for studies awaiting classification).  
56  
57  
58  
59  
60

1  
2  
3 Violations of pre-specified criteria for TENS were the most common reasons for excluding studies  
4 (supplementary file 4 for reasons for excluding studies). See supplementary file 1 for full details of  
5 screening, extraction, main and subgroup analyses, and interpretation, including risk of bias and  
6 GRADE judgements.  
7  
8  
9

10  
11 Included trials consist of 176 samples with chronic pain (osteoarthritis = 32 samples), 162 samples  
12 with acute pain (post-operative pain = 95 samples), 10 samples mixed, and 35 samples unclear.  
13  
14 There were 26 trials with overall low RoB (Figure 2 and supplementary file 1). Small sample size was  
15 an issue with 341 trials having fewer than 50 participants in the TENS group (mean  $\pm$  SD TENS group  
16 = 27.71  $\pm$  21.89 participants; 13 RCTs had  $\geq$ 100 participants in the TENS group). There were at least  
17 216 TENS interventions where participants had access to other treatments, most commonly  
18 medication or exercise as part of ongoing SoC, as a combination treatment or as rescue analgesia.  
19  
20 Often, monitoring and/or reporting of concurrent treatment(s) was deficient.  
21  
22  
23  
24  
25

26  
27 All studies met our pre-specified criteria for TENS, although unclear reporting hindered  
28 characterisation of specific aspects of TENS technique. We categorised 276 interventions as high  
29 frequency TENS (100Hz = 109 interventions) and 35 interventions as low frequency TENS.  
30  
31 Participants in some RCTs were instructed to adjust the pulse frequency of TENS as needed. TENS  
32 interventions varied considerably; supervised (therapist) or unsupervised (self-administered);  
33 prescribed or pro re nata (prn); single or multiple treatments; short treatment duration <1 minute  
34 for procedural pain or up to 2 years 'as required' for chronic pain. Inconsistency in treatment  
35 duration was mitigated by assessing TENS during or immediately after TENS treatment.  
36  
37  
38  
39  
40

41  
42 There were 352 of 381 RCTs that gathered continuous data for pain intensity and 164 RCTs had  
43 extractable data for meta-analysis. Figure 3 summarises overall effect sizes for treatment  
44 comparisons with at least 100 pooled data points per arm and Figure 4 summarises subgroup  
45 analyses for types of pain. There was insufficient extractable data to conduct responder analyses of  
46 participants reporting a  $\geq$ 30% or  $\geq$ 50% pain reduction unless otherwise stated.  
47  
48  
49  
50

51  
52 Supplementary file 1 provides details about analyses (i.e., main, subgroup and sensitivity), Forest  
53 and Funnel plots, and GRADE judgements with summary of findings tables.  
54  
55

## 56 57 **TENS versus Placebo**

58  
59  
60

1  
2  
3 We extracted mean (continuous) data from 91 of 202 RCTs comparing TENS with placebo. There was  
4 a significant overall effect in favour of TENS and substantial statistical heterogeneity (TENS = 2426  
5 participants, placebo = 2415 participants, SMD = -0.96 [95% CI -1.14, -0.78],  $I^2 = 88\%$ ).  
6  
7  
8

9  
10 Subgroup analyses found that the effect of TENS was not modified by methodological variables  
11 including overall RoB (score  $\leq 6$ , supplementary file 5), sample size, or the type of placebo. Subgroup  
12 analyses found that the effect of TENS was not modified by any pain characteristic including the  
13 duration (acute versus chronic, (supplementary file 6), mechanistic descriptors, or physiological  
14 structure involved.  
15  
16  
17

18  
19  
20 The test for subgroup differences for pain diagnoses was statistically significant ( $\text{Chi}^2 = 202.12$ ,  $\text{df} =$   
21  $23$  ( $P < 0.001$ ),  $I^2 = 88.6\%$ ) but there were more trials (and participants) contributing data from some  
22 pain conditions than others, and there was considerable unexplained heterogeneity between the  
23 trials within each of these subgroups. A sensitivity analysis following removal of subgroups with  
24 pooled sample sizes fewer than 100 participants in the TENS trial arm, rendered the test for  
25 subgroup differences for pain diagnoses not statistically significant (Figure 5). Therefore, we  
26 interpret these findings as pain diagnosis does not modify the effect of TENS in comparison to  
27 placebo.  
28  
29  
30  
31  
32  
33

34  
35 We downgraded evidence by one level for the combined effects of unexplained heterogeneity and  
36 possible publication bias. Egger's regression test showed significant evidence of a small-study effect  
37 ( $p < 0.0001$ ) and trim and fill analysis showed evidence of publication bias, indicating that eight trials  
38 might be missing to the right of the mean for an adjusted SMD of -0.78 (95% CI -0.995 to -0.565).  
39 Trim and fill did not alter the SMD to any appreciable degree. Approximately 90% of studies had  
40 'low' or 'unclear' overall risk of bias scores although sub-group and sensitivity analyses of RoB did  
41 not modify the effect of TENS. We did not judge there to be serious limitations for blinding of  
42 placebo because sham TENS devices have been shown to create uncertainty about whether a device  
43 is correctly functioning [21]; and there was less than 10% incidence of high RoB for random sequence  
44 generation and allocation concealment. Thus, it was not appropriate to downgrade further, and we  
45 judged there to be moderate-certainty evidence.  
46  
47  
48  
49  
50  
51  
52  
53

54  
55 We extracted dichotomous data from nine RCTs and found a statistically significant difference in the  
56 proportion of participants reporting a reduction of pain intensity  $\geq 50\%$  in favour of TENS (TENS =  
57 106/241 responders, placebo 28/219 responders, RR = 2.89 [2.02, 4.13],  $p < 0.00001$ ,  $I^2 = 0\%$ ). There  
58  
59  
60

1  
2  
3 were too few RCTs and participants to be entirely certain of the validity of the treatment effect  
4 estimate so we downgraded by one level to low-certainty evidence.  
5  
6  
7

### 8 **TENS versus No Treatment**

9  
10 We extracted mean (continuous) data from 10 of 16 RCTs (602 participants) comparing TENS with a  
11 no treatment control. There was a statistically significant difference in favour of TENS and  
12 substantial statistical heterogeneity (TENS = 298 participants, no treatment = 304 participants, SMD  
13 = -0.82 [95% CI -1.18, -0.46],  $I^2 = 76%$ ) (Figure 4). There was insufficient data to undertake subgroup  
14 analyses to explore the effect of methodological nor clinical characteristics on outcome. Egger's  
15 regression test showed significant evidence of a small-study effect ( $p = 0.0878$ ). However, Trim and  
16 fill analysis showed no evidence of publication bias. We downgraded one level to low-certainty  
17 evidence due to unexplained heterogeneity and small study effect.  
18  
19  
20  
21  
22  
23  
24

### 25 **TENS versus treatment(s) used as standard of care**

26 We extracted mean (continuous) data from 61 of 127 RCTs (3155 participants) comparing TENS with  
27 treatment(s) used as standard of care. There was a statistically significant difference in favour of  
28 TENS and substantial statistical heterogeneity (TENS = 1594 participants, SoC = 1561 participants,  
29 SMD = -0.72 [95% CI -0.95 to -0.5],  $I^2 = 88%$ ). (Figure 3). Subgroup analyses suggested that the type  
30 of SoC intervention (predominantly exercise/physiotherapy versus predominantly pharmacological)  
31 did not modify the effect of TENS. Egger's regression test showed significant evidence of a  
32 small-study effect ( $p = 0.0062$ ). Trim and fill analysis showed evidence of publication bias, indicating  
33 that 11 trials might be missing to left of mean for an adjusted SMD of -1.032 [95% -1.31, -0.76]. We  
34 downgraded one level for imprecision (unexplained heterogeneity effect) and one level for  
35 publication bias, small study effect and a RoB associated with unblinded treatment, i.e., to low  
36 certainty evidence.  
37  
38  
39  
40  
41  
42  
43  
44  
45  
46

### 47 **TENS versus other treatment(s)**

48 We extracted mean (continuous) data from 67 of 118 RCTs that compared TENS with a treatment,  
49 not categorised by RCT authors as SoC (67 RCTs, 131 samples, 3327 participants). We chose not to  
50 report the meta-analysis due to the heterogeneous mix of comparators, the inclusion of duplicate  
51 data in the TENS arm, and sub-groups with too few comparisons. Therefore, we did not GRADE this  
52 evidence.  
53  
54  
55  
56  
57

### 58 **High versus Low Frequency TENS**

1  
2  
3 We extracted mean (continuous) data from 13 of 37 RCTs (468 participants) that compared high with  
4 low frequency TENS and found no statistically significant difference (High Frequency TENS = 235  
5 participants, Low Frequency TENS = 233 participants, SMD = -0.19 [95% CI -0.43 to -0.06],  $I^2 = 39\%$ ).  
6  
7 (Figure 3). Egger's regression test showed no significant evidence of a small-study effect ( $p = 0.8871$ ).  
8  
9 Trim and fill analysis showed no evidence of publication bias. We downgraded by one level to  
10 moderate-certainty evidence of no difference because the pooled data sample size did not meet  
11 pre-specified threshold of at least 500 participants per trial arm.  
12  
13  
14  
15

## 16 **Safety**

17  
18 There were 136 reports that included a statement about adverse events (59/136 = no adverse  
19 events in all intervention groups, 90/136 = no adverse events related to TENS, see supplementary  
20 file 7 for characteristics of adverse events). Often statements were unclear. Adverse events  
21 associated with TENS were mild in severity, infrequent in occurrence and included skin irritation,  
22 tenderness/soreness, and TENS discomfort. There were no reports of a serious adverse event  
23 directly attributable to TENS. We extracted dichotomous data from 18 RCTs (1587 participants) and  
24 found no statistically significant difference in the risk of an adverse event, irrespective of severity,  
25 between TENS and comparators (RR = 0.73 [95% CI 0.36, 1.48],  $p = 0.38$ ,  $I^2 = 66\%$ ). The type of  
26 comparator did not modify the effect. We downgraded by two levels for indirectness because of the  
27 use of spontaneous detection of adverse events based on ill-defined criteria, and two levels for RoB,  
28 and one level for imprecision and for publication bias, i.e., to very low certainty evidence.  
29  
30  
31  
32  
33  
34  
35  
36  
37

## 38 **DISCUSSION**

### 39 **Statement of principal findings**

40  
41 Our meta-analysis of 91 RCTs (4841 participants) found that pain intensity was lower during or  
42 immediately after strong non-painful TENS administered to painful body parts, when compared with  
43 placebo. Risk of bias or trials with fewer than 50 participants per arm did not modify the effect of  
44 TENS, allaying at least in part, concerns that small study size may undermine the veracity of our  
45 conclusion [22]. Pain characteristics and diagnosis did not modify the effect of TENS compared with  
46 placebo. Inconsistency in individual trial results generated uncertainty in the magnitude of effect  
47 estimates for different types of pain but this was quantitative in nature (i.e., in the same direction  
48 and always in favour of TENS). Thus, we are confident that pain intensity is lower during or  
49 immediately after TENS treatment when compared with placebo.  
50  
51  
52  
53  
54  
55  
56  
57  
58  
59  
60



1  
2  
3 We judged there to be moderate certainty evidence that the magnitude of the effect size estimate  
4 exceeds the threshold for clinical importance, i.e., surpassed our 0.5 'rules of thumb' for Cohen's *d*.  
5  
6 The magnitude of the SMD suggests that mean pain score in the TENS groups was 0.96 standard  
7  
8 deviations lower than placebo (95% CI, 1.14 lower to 0.78 lower). The lower boundary of the 95% CI  
9  
10 exceeds our pre-specified threshold for a large and clinically meaningful difference using Cohen's  
11  
12 interpretation of effect size. This can be re-expressed by back transforming the SMD to a familiar  
13  
14 scale such as a 0 mm (no pain) to 100 mm (worst pain imaginable) visual analogue scale. To do this  
15  
16 we selected a low RoB study that was representative of the population and intervention in the meta-  
17  
18 analysis (i.e., by Atamaz et al. [23] - knee osteoarthritis) and multiplied the standard deviation of the  
19  
20 control group (20.3) by the pooled SMD (-0.96) producing a mean difference (MD) of 19.49 mm in  
21  
22 favour of TENS [17](chapter 15.5.3.2). This exceeds our prespecified criterion for clinical importance  
23  
24 in-line with IMMPACT criteria (i.e., set  $\geq 10$  mm on a 100 mm VAS) [15]. Likewise, we back-  
25  
26 transformed the SMD of Dailey et al. [24] (fibromyalgia, high frequency TENS, low risk of bias, used a  
27  
28 0-10 numerical rating scale) and calculated mean difference to be 1.91 points. This also exceeded  
29  
30 our criterion for clinical importance. We emphasise that effect sizes re-expressed in this way should  
31  
32 be interpreted with extreme caution because they are based on the standard deviation of only one  
33  
34 study.

35  
36 There was low certainty evidence that more participants reported at least 50% reduction in pain  
37  
38 during or immediately after TENS than placebo. There was low certainty evidence that pain intensity  
39  
40 was lower during TENS compared with exercise/physiotherapy or analgesic medications when they  
41  
42 were used wholly or as part of standard/routine care (61 RCTs, 3155 participants). Adverse events  
43  
44 were minor with no serious adverse events reported in 381 RCTs, but there was very low certainty  
45  
46 evidence of the estimation of risk ratio of an adverse event, irrespective of severity. Consequently,  
47  
48 we could not judge the clinical meaningfulness of these outcomes.

### 49 **Strengths of the study**

50  
51 Our systematic review of 381 RCTs (24532 participants) is the most comprehensive to date and is the  
52  
53 first to undertake an 'all-encompassing' meta-analysis. Our analysis is logical, systematic, rigorous,  
54  
55 and transparent, and we have been judicious when interpreting the analysis using the GRADE  
56  
57 approach.

58  
59 Our estimates of effect size during or immediately after a treatment of TENS at, or close to the site  
60  
of pain, is ecologically valid because symptomatic relief of pain 'in-the-moment' is of primary

1  
2  
3 importance. In practice, patients tailor treatment regimens to match the temporal characteristics of  
4 their pain at that moment in time. Our primary endpoint accounts for confounders associated with  
5 variability of TENS techniques and regimens, such as PRN, where participants may be using TENS  
6 intermittently. Credence is given to effect size estimates of long-term follow-up, but analysis of such  
7 outcomes is complex for TENS. Often trials reports are unclear whether data was collected within an  
8 ongoing course of treatment, or after a course of TENS treatment had finished (i.e., follow-up) and  
9 this would compromise simple pooling of long-term and/or follow-up data [10]. Our analysis of  
10 outcomes during or immediately after treatment also reduces the influence of participants who stop  
11 using TENS within a prolonged course of treatment. We noted a scarcity of data at six weeks, three  
12 months, six months, and 12 months after the end of a course of TENS treatment in studies included  
13 in our review. Thus, we suspect that effect sizes for long-term and/or follow-up outcomes will be  
14 less precise than those during or immediately after a TENS treatment.  
15  
16  
17  
18  
19  
20  
21  
22  
23  
24

### 25 **Weaknesses of the study**

26 An overview of Cochrane reviews on TENS for chronic pain did not pool data from small sized trials  
27 because of concern about imprecision [11,25]. We quantified small-study effect and publication bias,  
28 although the adjusted SMD using the trim and fill method did not alter the effect size estimate for  
29 TENS versus placebo. Our meta-analyses exposed high levels of unexplained statistical  
30 heterogeneity. Valentine et al. argues that a prospective or retrospective power analysis can be of  
31 value [26], although we preferred to make inferences based on pre-specified thresholds for pooling  
32 data suggested by Moore et al. [18](i.e.  $\geq 500$  participants per trial arm, and credence given to  
33 Individual trial arm sample sizes of  $\geq 200$  participants). There were insufficient studies with  
34 extractable data of at least 100 participants in the TENS group to conduct a sensitivity analysis,  
35 although removing studies with fewer than 50 participants did not affect the effect size estimates of  
36 any of our primary comparisons. The largest TENS trial arm sample size was 144 participants [27].  
37 There is potential to undertake further analyses in the future, such as examination of confidence  
38 interval width and retrospective power analysis based on a clinically important effect size rather  
39 than the observed effect size [26]. Meta-regression and network analyses could also explore the  
40 impact of inter-study heterogeneity and the relationships between different types of comparators  
41 on outcome.  
42  
43  
44  
45  
46  
47  
48  
49  
50  
51  
52  
53  
54

55 The impact of unclear reporting contributed to a high frequency of unclear risk of bias judgements  
56 and impacted negatively on the ability to categorise types of pain, the nature of comparators and  
57 whether participants used additional treatments. Remarkably few reports followed standards for  
58  
59  
60

1  
2  
3 design and reporting of TENS trials [28]. In placebo comparisons, blinding of participants was  
4 achieved using a sham TENS device (commonly without current) and pre-study briefings to create  
5 uncertainty about which intervention was functioning properly. This has been shown to be a valid  
6 method of reducing performance bias, although few of the included studies measured blinding  
7 success [29]. Contamination of effect size estimates by concurrent treatment was also an issue [30].  
8 We decided not to use generic inverse variance to correct for paired data associated with crossover  
9 trial data because of sufficient washout periods and an overwhelming number of parallel group data  
10 points.  
11  
12  
13  
14  
15  
16  
17

18 Most investigators reported spontaneous detection of adverse events based on ill-defined criteria  
19 resulting in very low certainty for the precision of our estimate of risk ratio. Inadequate adverse  
20 event reporting remains a concern in RCTs of non-pharmacological interventions for pain [31].  
21  
22  
23  
24

25 Judgements of the impact of study limitations (risk of bias), imprecision, inconsistency, indirectness,  
26 and publication bias resulted in downgrading the certainty of all effect size estimates according to  
27 GRADE criteria (supplementary file 1). Decisions to downgrade rely on judgements of the authorship  
28 team. Our decision to downgrade TENS versus placebo by only one level may be challenged. We  
29 decided that high statistical heterogeneity and possible publication bias was not sufficient enough to  
30 downgrade by two levels of evidence. Trim and fill did not alter the SMD to any appreciable degree.  
31 We did not downgrade for study limitation because sub-group analyses did not modify the effect of  
32 TENS and sensitivity analyses did not affect the overall effect size estimate. We argued that there  
33 would be low risk of blinding using sham TENS devices because their use has been shown to create  
34 uncertainty about whether a device is correctly functioning [21].  
35  
36  
37  
38  
39  
40  
41  
42  
43

#### 44 **Strengths and weaknesses in relation to other studies**

45 The findings of our meta-analysis are consistent with clinical experience and physiological  
46 plausibility. Since its inception over 50 years ago, clinical experience and expert opinion has  
47 remained resolute that TENS provides immediate short-term relief of pain by therapeutic  
48 neuromodulation, in a manner akin to rubbing the skin (for review see [3]). Physiological evidence  
49 demonstrates that selective activation of low threshold somatosensory peripheral afferents by TENS  
50 reduces activity and excitability of sensitised and non-sensitised central nociceptive transmission  
51 cells; and this effect does not persist far beyond the duration of stimulation [32,33]. Different  
52 frequencies of pulsed current influence central neuropharmacological actions in animal studies [34],  
53 but clinical research has failed to find relationships between electrical characteristics, type of pain  
54  
55  
56  
57  
58  
59  
60

1  
2  
3 and clinically meaningful outcome [12]. Our finding that adverse events were minor and mostly  
4 erythema and itchiness at the site of electrodes is consistent with evaluations of safety by  
5 professional bodies [35].  
6  
7  
8  
9

10 Previous systematic reviews and meta-analyses, including Cochrane reviews are inconsistent and/or  
11 inconclusive (for review see [3]). The 2021 NICE guidelines for chronic pain did not recommend TENS  
12 for chronic primary pain based on analyses of two RCTs on fibromyalgia [4]. The NICE excluded RCTs  
13 that had been evaluated in previous NICE guidelines (e.g., non-specific low back pain [6]), reducing  
14 the quantity of extractable data for meta-analysis. We analysed data from 20 trials that we coded as  
15 chronic primary pain according to ICD-11 and found a statistically significant overall effect in favour  
16 of TENS compared with placebo (SMD = -0.66 [-1.20, -0.29],  $P < 0.0004$ , supplementary file 1).  
17 Moreover, our finding that pain characteristics and diagnosis did not moderate the effect of TENS is  
18 of critical importance. Thus, we hope that these findings will be considered by future guideline  
19 panels.  
20  
21  
22  
23  
24  
25  
26  
27

### 28 **Meaning of the study**

29  
30 Our all-encompassing analysis of RCTs provides clinicians and policy makers with evidence that TENS  
31 is efficacious at reducing the intensity of pain 'in-the-moment'. Data was extracted and combined  
32 from a variety of settings (i.e., hospital, clinic, and home) and when TENS was administered on its  
33 own or in combination with other treatments. Scrutiny of data and sub-group analyses did not  
34 suggest that these factors influence outcome to an appreciable degree.  
35  
36  
37  
38  
39

### 40 *Implications for clinical practice*

41 Pain mechanisms are complex often causing uncertainty in finite diagnoses. Contemporary pain  
42 science suggests that pain acts to protect the integrity of tissue rather than monitor the status of  
43 tissue damage, i.e., hurt does not always mean harm. Our findings suggest that TENS *may* be  
44 beneficial for pain irrespective of pain characteristics or medical diagnosis, supporting the view that  
45 TENS should primarily be indicated according to symptoms i.e., the presence of pain rather than  
46 medical diagnosis. We encourage guideline panels to consider this evidence when evaluating TENS in  
47 the future. Nevertheless, we do not claim that TENS is efficacious for *all* types of pain because there  
48 were (and will never be) sufficient RCTs to judge for every pain characteristic or diagnosis.  
49  
50  
51  
52  
53  
54  
55

56  
57 Optimal pain management strategies adopt a biopsychosocial approach and a self-management  
58 framework to aid recovery, including return to activities of daily living and improvements in quality  
59  
60

1  
2  
3 of life. Core treatment involves physical activity and psychological interventions supported by pain  
4 education and lifestyle adjustments towards healthy living. Neuromodulation techniques such as  
5 TENS are used as adjuncts to core treatment, and used to alleviate sensations of pain, muscle  
6 tension and spasm, reducing the negative impact of an 'overprotective brain'. Patients report that  
7 TENS provides indirect benefits including enhanced function, improved psychological well-being,  
8 better sleep, and medication reduction; therefore, TENS is widely accepted by patients because it is  
9 in-expensive, can be self-administered, and has no toxicity [36,37]. In clinical practice, users are  
10 advised to personalise their treatment strategy, including the electrical characteristics of currents,  
11 according to their personal needs.  
12  
13  
14  
15  
16  
17  
18  
19

20 Recently, Johnson [9] argued that the long-standing search for optimal TENS parameters for specific  
21 pathology-based pain conditions has been futile, and that the quality of the TENS sensation rather  
22 than specific electrical characteristics of current is the critical factor for success. Our analysis  
23 suggested that the frequency of currents does not modify outcome when a strong non-painful TENS  
24 sensation is generated within or close to the site of pain, and we suspect this would also be the case  
25 for pulse duration (width) and pulse pattern if sufficient data became available. This supports best  
26 practice guidelines to advise patients to self-administer strong non-painful TENS within or close to  
27 the site of pain, and to adjust pulse frequency, duration, and pattern to what is most comfortable.  
28 Patients are advised to administer TENS as often as is necessary, although there is evidence that  
29 physiological tolerance may develop [38]. This does not appear to have a significant impact in clinical  
30 practice when a variety of troubleshooting strategies are used, including the use of modulated  
31 currents to create a novel input to the nervous system [39].  
32  
33  
34  
35  
36  
37  
38  
39  
40  
41

42 In summary, TENS should be considered in a similar manner to rubbing, cooling, or warming the skin  
43 to provide symptomatic relief of pain via neuromodulation. One advantage of TENS is that users can  
44 adjust electrical characteristics to produce a wide variety of TENS sensations such as pulsate and  
45 paraesthesiae to combat the dynamic nature of pain. Consequently, patients need to learn how to  
46 use a systematic process of trial and error to select electrode positions and electrical characteristics  
47 to optimise benefits and minimize problems on a moment to moment basis [40].  
48  
49  
50  
51  
52  
53

#### 54 **Unanswered questions and future research**

55 Our findings should discourage publication of small sized RCTs and new systematic reviews until  
56 larger RCTs become available. For decades, systematic reviewers have called for large multicentred  
57 RCTs to resolve the efficacy-impasse. This situation is unlikely to change in the foreseeable future,  
58  
59  
60

1  
2  
3 due in part to a lack of funding [9]. We recommend the delivery of an enriched enrolment  
4 randomised withdrawal design with trial arm sample sizes greater than 200 participants to overcome  
5 methodological issues [9,28]. We suspect that such a trial would produce an effect size estimate  
6 close to our analysis of TENS versus placebo.  
7  
8  
9

10  
11 Our findings justify the need for pragmatic ecologically valid studies gathering real-world data about  
12 how best to integrate TENS into practice. Recently, a 30-minute TENS treatment was shown to  
13 predict longer-term outcome in women with fibromyalgia [41]. Real world data can be used to  
14 develop educational packages to train and support patients to optimise TENS treatment within a  
15 self-care model of pain management [36,37]. We did not undertake a cost-benefit analysis, although  
16 previous analyses provide evidence that TENS equipment, running costs and follow-up clinical  
17 support is inexpensive and can reduce annual costs for chronic low back pain and knee osteoarthritis  
18 [42,43].  
19  
20  
21  
22  
23  
24  
25

## 26 **Conclusions**

27  
28 This systematic review resolves long-term uncertainty about the efficacy of TENS. The meta-analysis  
29 provides moderate-certainty evidence that strong non-painful TENS within or close to the site of  
30 pain, produces clinically important reductions in the intensity of pain during or immediately after  
31 treatment, with no reports of serious adverse events. Clinicians, policy makers and funders should  
32 consider TENS as an adjunct to core treatment for immediate-short-term relief of pain, irrespective  
33 of diagnosis. Patients should be advised to tailor TENS treatment according to their individual needs.  
34  
35  
36  
37  
38  
39  
40  
41  
42  
43  
44  
45  
46  
47  
48  
49  
50  
51  
52  
53  
54  
55  
56  
57  
58  
59  
60



### Author contributions

Based on CRediT (Contributor Roles Taxonomy) <http://credit.niso.org/>

- Conceptualization: MIJ
- Data curation: MIJ, PGW, CAP (GJ cross checking)
- Formal Analysis: MIJ, PGW, CAP, MRM, GJ
- Funding acquisition: MIJ
- Investigation: MIJ, PGW, CAP, MRM, GJ
  - Development and delivery of search strategy: PGW, MIJ
  - Screening for eligibility: PGW, MIJ (CAP and GJ as arbiters)
  - Data extraction: MIJ, PGW, (CAP, GJ cross checking)
  - Assessment of risk of bias: MIJ, CAP, (PGW as arbiter)
  - Assessment of adverse events: MIJ, CAP, PGW
  - Assessment of effects of interventions: MIJ, PGW, CAP (GJ and MRM arbiters)
  - Assessment of publication bias: MRM, PGW, MIJ
  - GRADE assessment against criteria: MIJ, CAP (PGW, GJ as arbiters)
  - Overall GRADE judgement: MIJ, CAP, PGW, MRM, GJ
  - Interpreting the results: MIJ, PGW, CAP, MRM, GJ
- Methodology (Protocol development): MIJ, PGW, CAP, GJ
- Project administration: MIJ
- Resources: MIJ
- Software: MIJ, MRM
- Supervision: MIJ
- Validation: MIJ
- Visualization: MIJ
- Writing – original draft: MIJ
- Writing – review & editing: MIJ, PGW, CAP, GJ, MRM

All authors had access to the data and took responsibility for the integrity of the data and the accuracy of the data analysis. All authors approved the final version of the review.

Data sharing: Extracted data is available on request from Prof. Mark I. Johnson

Transparency declaration: I (Prof. Mark I. Johnson) affirm that the manuscript is an honest, accurate, and transparent account of the study being reported; that no important aspects of the study have been omitted; and that any discrepancies from the study as planned (and, if relevant, registered) have been explained.

Funding: GlaxoSmithKline (GSK) Consumer Healthcare, Nyon, Switzerland provided funding for the study (Investigator Sponsored Study grant, award/grant number N/A). The funder had no role in study design, data collection, data analysis, data interpretation, or writing of the report. The corresponding author had full access to all the data in the study and had final responsibility for the decision to submit for publication.

Competing interests: All authors have completed the ICMJE uniform disclosure form and declare the following:

Prof. Mark I. Johnson (taken from ICMJE form)

Dr. Johnson reports grants from GlaxoSmithKline, during the conduct of the study; other from GlaxoSmithKline, other from TENS Care, other from Actegy Ltd, personal fees from Oxford University Press, other from LifeCare Ltd, other from GlaxoSmithKline, other from Eurocept Pharmaceuticals,

1  
2  
3 outside the submitted work; and I was involved in conducting the following studies that were  
4 considered for inclusion in the work submitted for publication

- 5 1. Dissanayaka TD, Pallegama RW, Suraweera HJ, Johnson MI, Kariyawasam AP. (2016).  
6 Comparison of the Effectiveness of Transcutaneous Electrical Nerve Stimulation and  
7 Interferential Therapy on the Upper Trapezius in Myofascial Pain Syndrome: A Randomized  
8 Controlled Study. American Journal of Physical Medicine and Rehabilitation 2016  
9 Sep;95(9):663-72.
- 10 2. Palmer S, Domaille M, Cramp F, Walsh N, Pollock J, Kirwan J, Johnson MI. (2014)  
11 Transcutaneous Electrical Nerve Stimulation as an adjunct to education and exercise for  
12 knee osteoarthritis: a randomised controlled trial. Arthritis Care & Research 2014: 66(3),  
13 387–394 – Funded by the Physiotherapy Research Foundation (part of the Chartered Society  
14 of Physiotherapy Charitable Trust) and Above & Beyond Charities.
- 15 3. Pallett EJ, Rentowl P, Johnson MI, Watson PJ (2014) Implementation fidelity of self-  
16 administered Transcutaneous Electrical Nerve Stimulation (TENS) in patients with chronic  
17 back pain: An observational study. Clin J Pain. 2014: Mar;30(3):224-31.
- 18 4. Kolen AF, de Nijs RN, Wagemakers FM, Meier AJ, Johnson MI (2012) The effects of spatially  
19 targeted transcutaneous electrical nerve stimulation (TENS) using an electrode array that  
20 measures skin resistance on pain and mobility in patients with osteoarthritis in the knee: A  
21 randomized controlled trial. Pain. 2012 Feb;153(2):373-81. – Funded by Phillips Research  
22 Europe  
23  
24  
25

26 Drs Carole A. Paley, Gareth Jones, Mathew R. Mulvey and Priscilla G. Wittkopf declare no competing  
27 interests

28  
29 Patient and public involvement: There was no patient or public involvement in any aspect of this  
30 study or its write-up.

31  
32 Patient consent for publication: Not required.

33  
34 Ethics Statement: Not applicable/No human participants included

35  
36  
37 Dissemination to participants and related patient and public communities: We plan to disseminate  
38 our findings to patient organisations and media outlets.

39  
40 Acknowledgements: None

41  
42 I, the Submitting Author has the right to grant and does grant on behalf of all authors of the Work  
43 (as defined in the author licence), an exclusive licence and/or a non-exclusive licence for  
44 contributions from authors who are: i) UK Crown employees; ii) where BMJ has agreed a CC-BY  
45 licence shall apply, and/or iii) in accordance with the terms applicable for US Federal Government  
46 officers or employees acting as part of their official duties; on a worldwide, perpetual, irrevocable,  
47 royalty-free basis to BMJ Publishing Group Ltd ("BMJ") its licensees.  
48  
49  
50  
51  
52  
53  
54  
55  
56  
57  
58  
59  
60

## REFERENCES

1. Diseases, G.B.D.; Injuries, C. Global burden of 369 diseases and injuries in 204 countries and territories, 1990-2019: a systematic analysis for the Global Burden of Disease Study 2019. *Lancet* **2020**, *396*, 1204-1222, doi:10.1016/S0140-6736(20)30925-9.
2. Pitcher, M.H.; Von Korff, M.; Bushnell, M.C.; Porter, L. Prevalence and Profile of High-Impact Chronic Pain in the United States. *J Pain* **2019**, *20*, 146-160, doi:10.1016/j.jpain.2018.07.006.
3. Johnson, M.I. Transcutaneous electrical nerve stimulation. In *Electrophysical agents*, 13 ed.; Watson, T., Nussbaum, E.L., Eds. Elsevier: 2020; pp. 264-295.
4. National Institute for Health and Care Excellence (NICE). Chronic Pain (Primary and Secondary) in over 16s: Assessment of all Chronic Pain and Management of Chronic Primary Pain (NG193). National Institute for Health and Care Excellence (NICE): London, UK, 2021; pp 1–36.
5. National Institute for Health and Clinical Excellence (NICE). *NICE clinical guideline 55 Intrapartum care: care of healthy women and their babies during childbirth*; London, 2007; pp 1-65.
6. National Institute for Health and Care Excellence (NICE). Low back pain and sciatica in over 16s: assessment and management. Clinical guideline [NG59]. National Institute for Health and Care Excellence (NICE): 2016; pp 1-18.
7. National Institute for Health and Care Excellence (NICE). *Osteoarthritis: care and management. NICE guidelines [CG177]* London, 2014; pp 1-37.
8. National Institute for Health and Clinical Excellence (NICE). *NICE clinical guideline 79 Rheumatoid arthritis: The management of rheumatoid arthritis in adults*; London, 2009; pp 1-35.
9. Johnson, M.I. Resolving Long-Standing Uncertainty about the Clinical Efficacy of Transcutaneous Electrical Nerve Stimulation (TENS) to Relieve Pain: A Comprehensive Review of Factors Influencing Outcome. *Medicina* **2021**, *57*, doi:10.3390/medicina57040378.
10. Paley, C.A.; Wittkopf, P.G.; Jones, G.; Johnson, M.I. Does TENS Reduce the Intensity of Acute and Chronic Pain? A Comprehensive Appraisal of the Characteristics and Outcomes of 169 Reviews and 49 Meta-Analyses. *Medicina* **2021**, *57*, doi:<https://doi.org/10.3390/xxxxx>.
11. Gibson, W.; Wand, B.M.; Meads, C.; Catley, M.J.; O'Connell, N.E. Transcutaneous electrical nerve stimulation (TENS) for chronic pain - an overview of Cochrane Reviews. *Cochrane Database Syst Rev* **2019**, *2*, CD011890, doi:10.1002/14651858.CD011890.pub2.
12. Johnson, M.I.; Ashton, C.H.; Thompson, J.W. An in-depth study of long-term users of transcutaneous electrical nerve stimulation (TENS). Implications for clinical use of TENS. *Pain* **1991**, *44*, 221-229.
13. Johnson, M.I.; Jones, G.; Paley, C.A.; Wittkopf, P.G. The clinical efficacy of transcutaneous electrical nerve stimulation (TENS) for acute and chronic pain: a protocol for a meta-analysis of randomised controlled trials (RCTs). *BMJ Open* **2019**, *9*, doi:10.1136/bmjopen-2019-029999.
14. Moore, R.A.; Derry, S.; Wiffen, P.J. Challenges in design and interpretation of chronic pain trials. *British journal of anaesthesia* **2013**, *111*, 38-45, doi:10.1093/bja/aet126.
15. Dworkin, R.H.; Turk, D.C.; Wyrwich, K.W.; Beaton, D.; Cleeland, C.S.; Farrar, J.T.; Haythornthwaite, J.A.; Jensen, M.P.; Kerns, R.D.; Ader, D.N., et al. Interpreting the clinical importance of treatment outcomes in chronic pain clinical trials: IMMPACT recommendations. *J Pain* **2008**, *9*, 105-121.
16. Cohen, J. *Statistical Power Analysis for the Behavioral Sciences.*, 2 ed.; Earlbaum: Hillsdale, NJ, 1988.
17. Higgins, JPT. *Cochrane Handbook for Systematic Reviews of Interventions, 2nd Edition*; Wiley-Blackwell: 2019; pp. 728.

18. Moore, R.A.; Gavaghan, D.; Tramer, M.R.; Collins, S.L.; McQuay, H.J. Size is everything--large amounts of information are needed to overcome random effects in estimating direction and magnitude of treatment effects. *Pain* **1998**, *78*, 209-216.
19. Richardson, M., Garner, P., Donegan, S. Interpretation of subgroup analyses in systematic reviews: A tutorial. *Clinical Epidemiology and Global Health* **2019**, *7*, 192-198.
20. Ryan, R.; Hill, S. How to GRADE the quality of the evidence. Available online: <http://cccr.org.cochrane.org/author-resources> (accessed on 28 September 2021).
21. Rakel, B.; Cooper, N.; Adams, H.J.; Messer, B.R.; Frey Law, L.A.; Dannen, D.R.; Miller, C.A.; Polehna, A.C.; Ruggle, R.C.; Vance, C.G., et al. A new transient sham TENS device allows for investigator blinding while delivering a true placebo treatment. *Journal of Pain* **2010**, *11*, 230-238, doi:10.1016/j.jpain.2009.07.007.
22. Dechartres, A.; Trinquart, L.; Boutron, I.; Ravaud, P. Influence of trial sample size on treatment effect estimates: meta-epidemiological study. *BMJ* **2013**, *346*, f2304, doi:10.1136/bmj.f2304.
23. Atamaz, F.C.; Durmaz, B.; Baydar, M.; Demircioglu, O.Y.; Iliyapici, A.; Kuran, B.; Oncel, S.; Sendur, O.F. Comparison of the efficacy of transcutaneous electrical nerve stimulation, interferential currents, and shortwave diathermy in knee osteoarthritis: a double-blind, randomized, controlled, multicenter study. *Archives of Physical Medicine and Rehabilitation* **2012**, *93*, 748-756.
24. Dailey, D.L.; Vance, C.G.T.; Rakel, B.A.; Zimmerman, M.B.; Embree, J.; Merriwether, E.N.; Geasland, K.M.; Chimenti, R.; Williams, J.M.; Golchha, M., et al. Transcutaneous Electrical Nerve Stimulation Reduces Movement-Evoked Pain and Fatigue: A Randomized, Controlled Trial. *Arthritis & Rheumatology* **2020**, *72*, 824-836, doi:10.1002/art.41170.
25. Travers, M.J.; O'Connell, N.E.; Tugwell, P.; Eccleston, C.; Gibson, W. Transcutaneous electrical nerve stimulation (TENS) for chronic pain: the opportunity to begin again. *The Cochrane Database Systematic Reviews* **2020**, *4*, ED000139, doi:10.1002/14651858.ED000139.
26. Valentine, J.C.; Pigott, T.D.; Rothstein, H.R. How many studies do you need? A primer on statistical power for meta-analysis. *Journal of Educational and Behavioral Statistics* **2010**, *35*, 215-247.
27. Borup, L.; Wurlitzer, W.; Hedegaard, M.; Kesmodel, U.S.; Hvidman, L. Acupuncture as pain relief during delivery: a randomized controlled trial. *Birth* **2009**, *36*, 5-12.
28. Bennett, M.I.; Hughes, N.; Johnson, M.I. Methodological quality in randomised controlled trials of transcutaneous electric nerve stimulation for pain: low fidelity may explain negative findings. *Pain* **2011**, *152*, 1226-1232.
29. Rakel, B.; Cooper, N.; Adams, H.J.; Messer, B.R.; Frey Law, L.A.; Dannen, D.R.; Miller, C.A.; Polehna, A.C.; Ruggle, R.C.; Vance, C.G., et al. A new transient sham TENS device allows for investigator blinding while delivering a true placebo treatment. *J Pain* **2010**, *11*, 230-238.
30. Grovle, L.; Hasvik, E.; Haugen, A.J. Rescue and concomitant analgesics in placebo-controlled trials of pharmacotherapy for neuropathic pain and low back pain. *Pain* **2020**, *161*, 3-10, doi:10.1097/j.pain.0000000000001690.
31. Hunsinger, M.; Smith, S.M.; Rothstein, D.; McKeown, A.; Parkhurst, M.; Hertz, S.; Katz, N.P.; Lin, A.H.; McDermott, M.P.; Rappaport, B.A., et al. Adverse event reporting in nonpharmacologic, noninterventional pain clinical trials: ACTION systematic review. *Pain* **2014**, *155*, 2253-2262, doi:10.1016/j.pain.2014.08.004.
32. Ma, Y.T.; Sluka, K.A. Reduction in inflammation-induced sensitization of dorsal horn neurons by transcutaneous electrical nerve stimulation in anesthetized rats. *Experimental Brain Research* **2001**, *137*, 94-102.
33. Garrison, D.W.; Foreman, R.D. Effects of transcutaneous electrical nerve stimulation (TENS) on spontaneous and noxiously evoked dorsal horn cell activity in cats with transected spinal cords. *Neuroscience Letters* **1996**, *216*, 125-128.

- 1  
2  
3  
4  
5  
6  
7  
8  
9  
10  
11  
12  
13  
14  
15  
16  
17  
18  
19  
20  
21  
22  
23  
24  
25  
26  
27  
28  
29  
30  
31  
32  
33  
34  
35  
36  
37  
38  
39  
40  
41  
42  
43  
44  
45  
46  
47  
48  
49  
50  
51  
52  
53  
54  
55  
56  
57  
58  
59  
60
34. Sluka, K.A.; Vance, C.G.; Lisi, T.L. High-frequency, but not low-frequency, transcutaneous electrical nerve stimulation reduces aspartate and glutamate release in the spinal cord dorsal horn. *J Neurochem* **2005**, *95*, 1794-1801.
35. Houghton, P.; Nussbaum, E.; Hoens, A. Electrophysical agents. Contraindications and Precautions: An Evidence-Based Approach to Clinical Decision Making in Physical Therapy. *Physiotherapy Canada* **2010**, *62*, 5-80.
36. Gozani, S.N.; Ferree, T.C.; Moynihan, M.; Kong, X. Impact of transcutaneous electrical nerve stimulation on sleep in chronic low back pain: a real-world retrospective cohort study. *Journal of Pain Research* **2019**, *12*, 743-752, doi:10.2147/JPR.S196129.
37. Gladwell, P.W.; Cramp, F.; Palmer, S. Matching the perceived benefits of Transcutaneous Electrical Nerve Stimulation (TENS) for chronic musculoskeletal pain against Patient Reported Outcome Measures using the International Classification of Functioning, Disability and Health (ICF). *Physiotherapy* **2020**, *106*, 128-135, doi:10.1016/j.physio.2019.01.017.
38. Liebano, R.E.; Rakel, B.; Vance, C.G.; Walsh, D.M.; Sluka, K.A. An investigation of the development of analgesic tolerance to TENS in humans. *Pain* **2011**, *211*, 335-342.
39. Desantana, J.M.; Santana-Filho, V.J.; Sluka, K.A. Modulation between high- and low-frequency transcutaneous electric nerve stimulation delays the development of analgesic tolerance in arthritic rats. *Arch Phys Med Rehabil* **2008**, *89*, 754-760.
40. Johnson, M.I. *Transcutaneous electrical nerve stimulation (TENS). Research to support clinical practice*; Oxford University Press Oxford, UK, 2014.
41. Vance, C.G.; Zimmerman, M.B.; Dailey, D.L.; Rakel, B.A.; Geasland, K.M.; Chimenti, R.L.; Williams, J.M.; Golchha, M.; Crofford, L.J.; Sluka, K.A. Reduction in movement-evoked pain and fatigue during initial 30-minute TENS treatment predicts TENS responders in women with fibromyalgia. *Pain* **2021** *162*(5):1545-1555.
42. Pivec, R.; Minshall, M.E.; Mistry, J.B.; Chughtai, M.; Elmallah, R.K.; Mont, M.A. Decreased Opioid Utilization and Cost at One Year in Chronic Low Back Pain Patients Treated with Transcutaneous Electric Nerve Stimulation (TENS). *Surg Technol Int* **2015**, *27*, 268-274.
43. Woods, B.; Manca, A.; Weatherly, H.; Saramago, P.; Sideris, E.; Giannopoulou, C.; Rice, S.; Corbett, M.; Vickers, A.; Bowes, M., et al. Cost-effectiveness of adjunct non-pharmacological interventions for osteoarthritis of the knee. *PLoS One* **2017**, *12*, e0172749, doi:10.1371/journal.pone.0172749.

References cited in figures or tables are listed within individual files

## FIGURE LEGENDS

### Figure 1

PRISMA Flow Chart

### Figure 2

Methodological quality graph: review authors' judgments about each methodological quality item presented as percentages across all included studies.

### Figure 3

Summary of standardised mean difference (SMD) and 95% confidence intervals (95%CI) of pain intensity for intervention comparisons and main subgroup group analyses of risk of bias (RoB) and trial arm size.

### Figure 4

Summary of subgroup group analyses of type of pain for the standardised mean difference (SMD) and 95 % confidence intervals (95%CI) of pain intensity between TENS and placebo. RCTs; randomised controlled trials.

### Figure 5

Forest plot of subgroup group analyses of diagnoses for the standardised mean difference (SMD) and 95 % confidence intervals (95%CI) of pain intensity between TENS and placebo. RCTs; randomised controlled trials.

## SUPPLEMENTARY MATERIALS

### Supplementary file 1 (File: SF1\_MetaTENS\_SuppMaterial\_File1\_BMJO\_06-10-2021.docx)

Supplementary material providing details of all operational processes associated with our systematic review and meta-analysis including methods, data analyses and interpretation of findings.

### Supplementary file 2 (File: SF2\_TABLE\_SF2\_IncludedStudies.pdf)

Summary of the characteristics of the included randomised controlled trials

### Supplementary file 3 (File: SF3\_TABLE\_SF3\_AwaitingClassification.pdf)

Studies awaiting classification

### Supplementary file 4 (File: SF4\_TABLE\_SF4\_ExcludedStudies.pdf)

Summary of the reasons for excluding studies

### Supplementary file 5 (File: SF5\_Fig\_SF5\_SUBMIT.pdf)

Forest plot of standardised mean difference (SMD) and 95% confidence intervals (95%CI) of pain intensity rating between TENS and placebo with subgroup group analysis of risk of bias (RoB)

### Supplementary file 6 (File: SF6\_Fig\_SF6\_SUBMIT.pdf)

Forest plot of standardised mean difference (SMD) and 95% confidence intervals (95%CI) of pain intensity rating between TENS and placebo with subgroup group analysis of acute versus chronic pain

### Supplementary file 7 (File: SF7\_TABLE\_SF7\_AdverseEvents.pdf)

Summary of the characteristics of TENS-related adverse events



1  
2  
3  
4  
5  
6  
7  
8  
9  
10  
11  
12  
13  
14  
15  
16  
17  
18  
19  
20  
21  
22  
23  
24  
25  
26  
27  
28  
29  
30  
31  
32  
33  
34  
35  
36  
37  
38  
39  
40  
41  
42  
43  
44  
45  
46  
47  
48  
49  
50  
51  
52  
53  
54  
55  
56  
57  
58  
59  
60

For peer review only

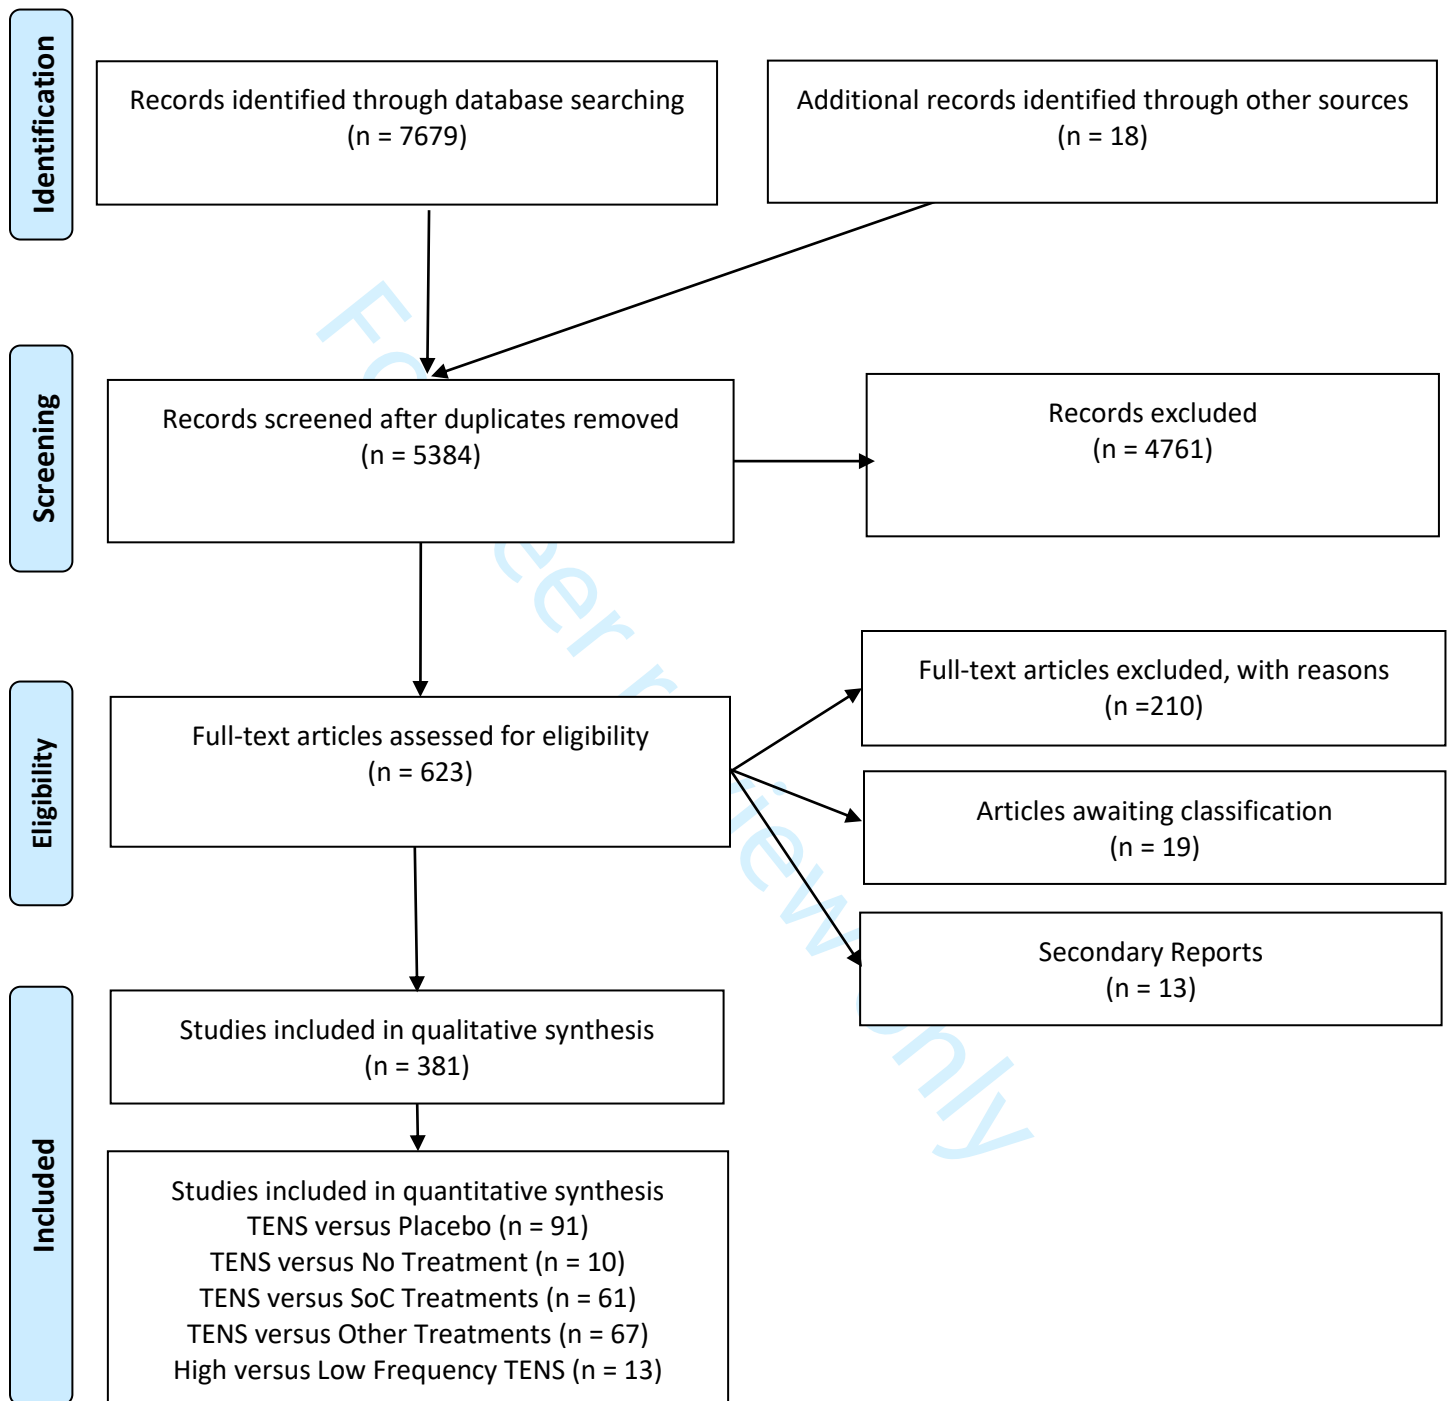

1  
2  
3  
4  
5  
6  
7  
8  
9  
10  
11  
12  
13  
14  
15  
16  
17  
18  
19  
20  
21  
22  
23  
24  
25  
26  
27  
28  
29  
30  
31  
32  
33  
34  
35  
36  
37  
38  
39  
40  
41  
42  
43  
44  
45  
46  
47  
48  
49  
50  
51  
52  
53  
54  
55  
56  
57  
58  
59  
60



## Comparison

### TENS vs Placebo (91 RCTs, N = 4841, I2 = 88%)

- Low RoB (15 RCTs, N = 1104, I2 = 93%)
- High/Unclear RoB (76 RCTs, N = 3737, I2 = 86%)
- n>50 participants per group (8 RCTs, N = 1197, I2 = 95%)
- n<50 participants per group (83 RCTs, N = 3644, I2 = 85%)

### TENS vs No Treatment (10 RCTs, N = 602, I2 = 76%)

### TENS vs SoC treatments (61 RCTs, N = 3155, I2 = 88%)

- Exercise/Physiotherapy (25 RCTs, N = 1114, I2 = 88%)
- Medication (27 RCTs, N = 1420, I2 = 86%)

### High vs Low Frequency (13 RCTs, N = 468, I2 = 39%)

(\*HF = high frequency; LF = low frequency)

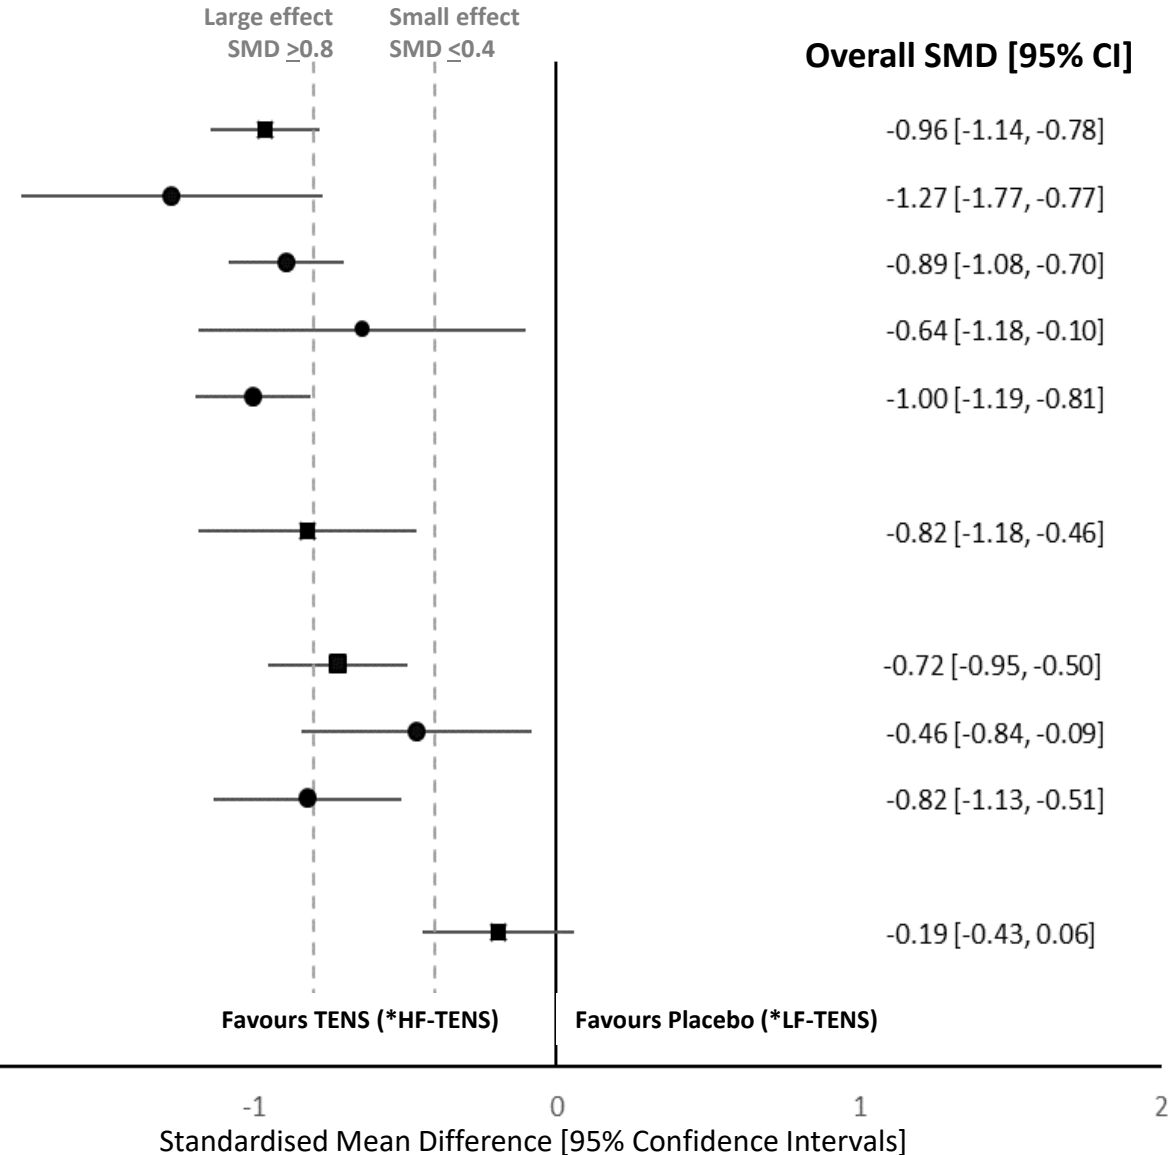

1  
2  
3  
4  
5  
6  
7  
8  
9  
10  
11  
12  
13  
14  
15  
16  
17  
18  
19  
20  
21  
22  
23  
24  
25  
26  
27  
28  
29  
30  
31  
32  
33  
34  
35  
36  
37  
38  
39  
40  
41

### Comparison

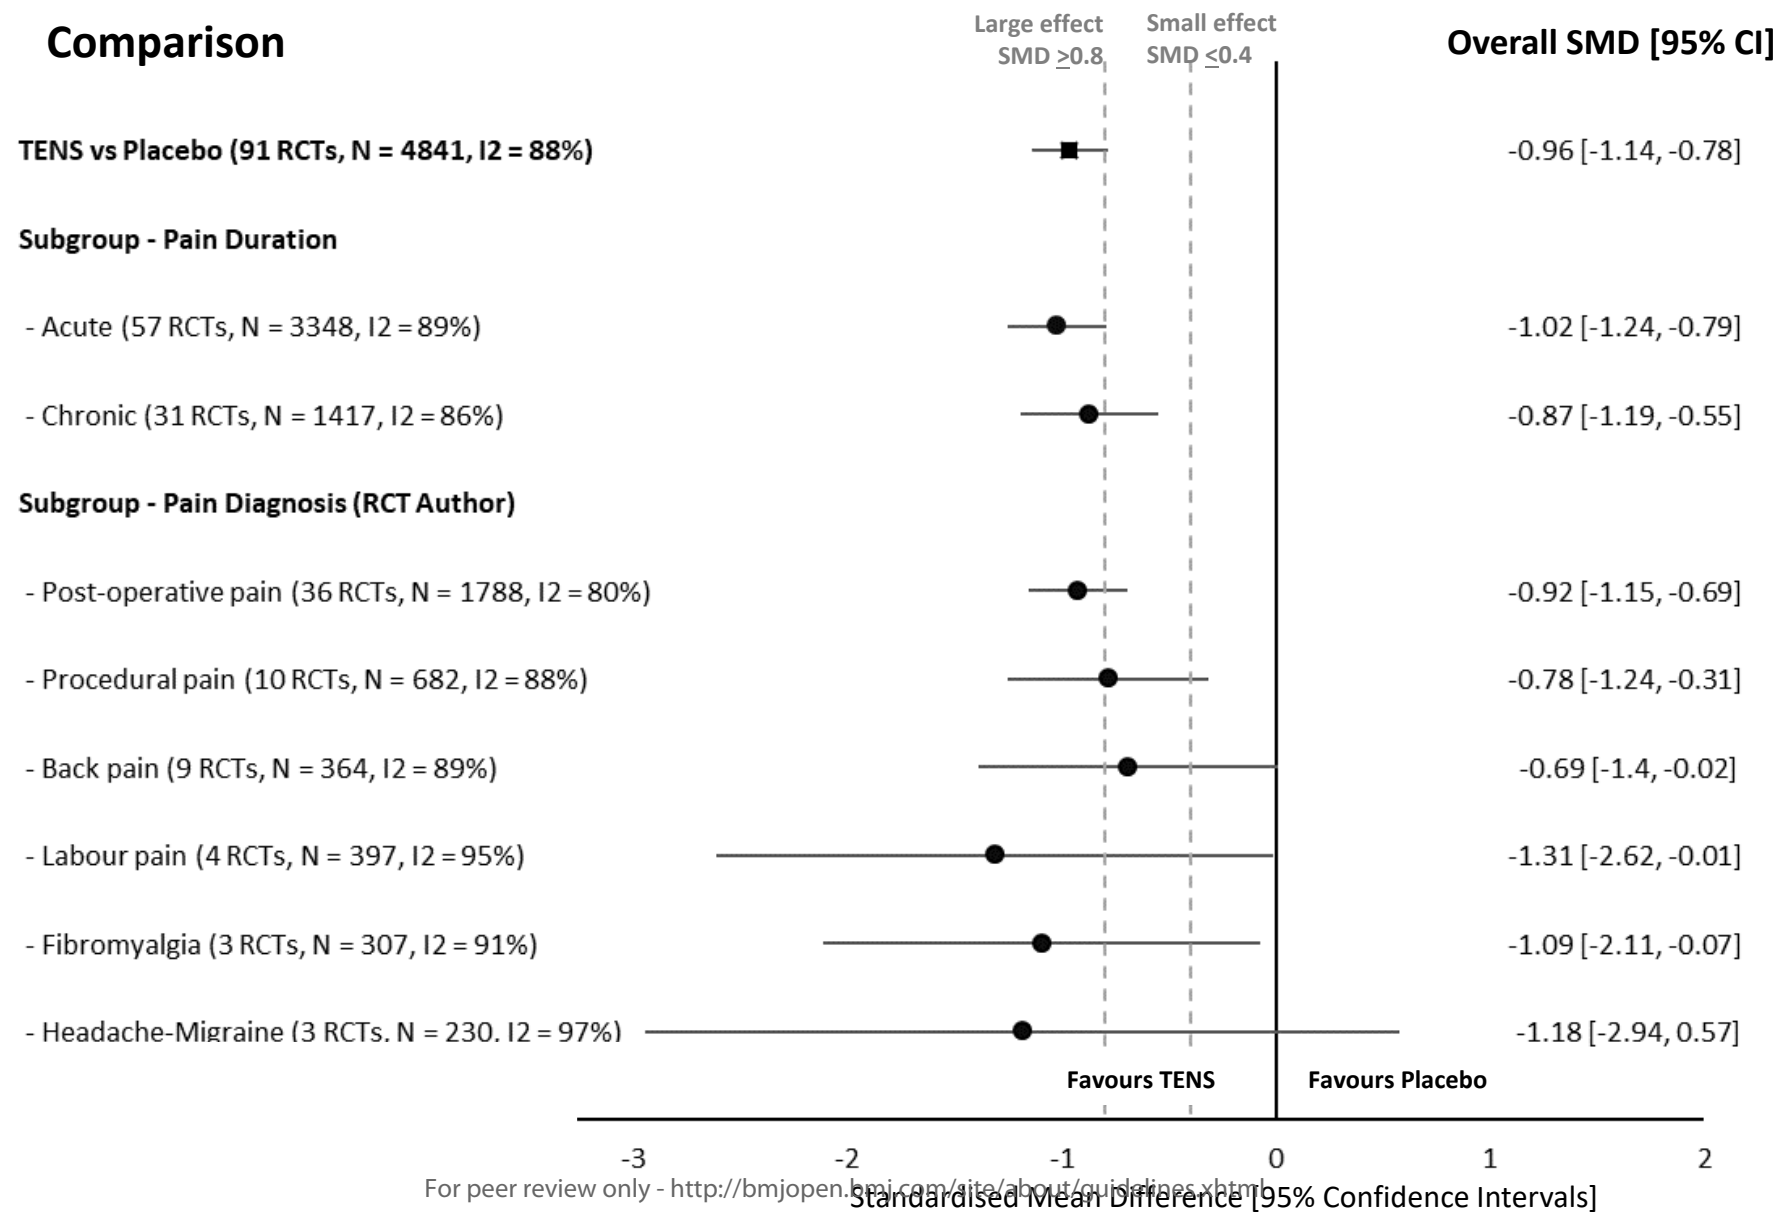

1  
2  
3  
4  
5  
6  
7  
8  
9  
10  
11  
12  
13  
14  
15  
16  
17  
18  
19  
20  
21  
22  
23  
24  
25  
26  
27  
28  
29  
30  
31  
32  
33  
34  
35  
36  
37  
38  
39  
40  
41  
42  
43  
44  
45  
46  
47  
48  
49  
50  
51  
52  
53  
54  
55  
56  
57  
58  
59  
60

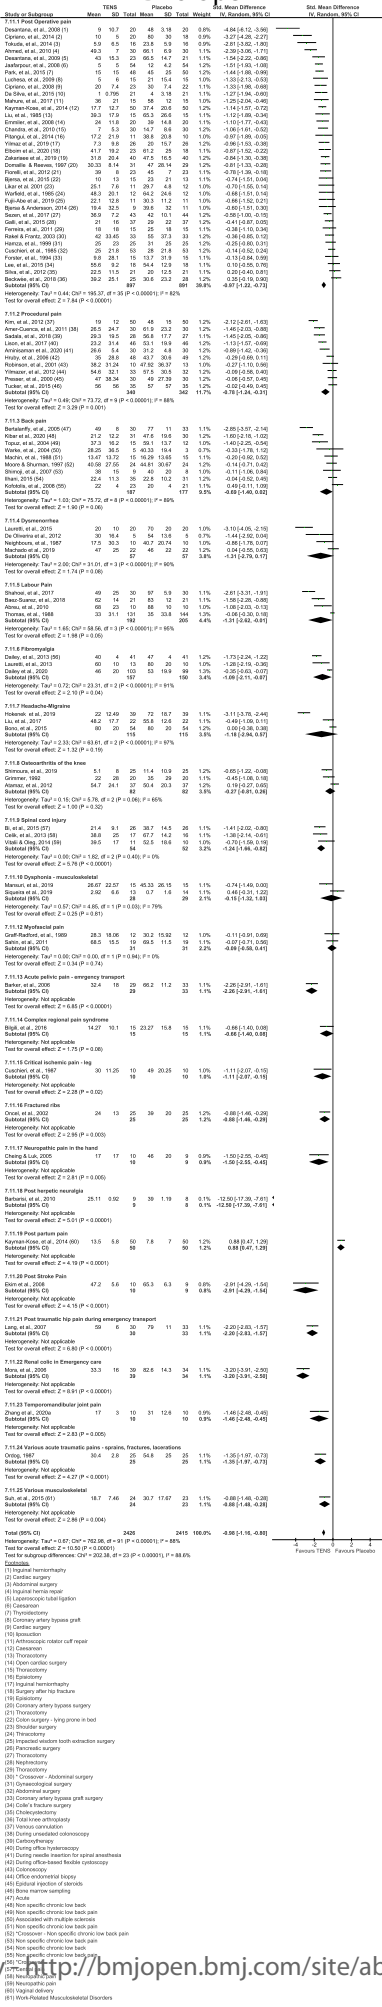



## Supplementary Material

### Efficacy and Safety of Transcutaneous Electrical Nerve Stimulation (TENS) for Acute and Chronic Pain: A systematic review and meta-analysis (The Meta-TENS study)

#### Context

This document provides detailed information about all operational processes associated with our systematic review and meta-analysis. The document includes a variety of artefacts including aide memoires used in decision-making. In-text references have been cited using an Author-date format for ease of tracking.

#### Contents

#### Table of Contents

|                                                                                 |    |
|---------------------------------------------------------------------------------|----|
| Contents.....                                                                   | 1  |
| SECTION 1 – SUPPLEMENTARY DETAILS OF METHODS .....                              | 6  |
| Search Strategy .....                                                           | 6  |
| Search methods for identification of studies.....                               | 6  |
| Electronic searches .....                                                       | 6  |
| MEDLINE Search Terms for RCTs .....                                             | 7  |
| MEDLINE Search Terms for systematic reviews.....                                | 7  |
| Eligibility Screening .....                                                     | 8  |
| Description of screening for eligibility .....                                  | 8  |
| Selection of studies.....                                                       | 8  |
| Types of outcome measures .....                                                 | 8  |
| Types of studies .....                                                          | 8  |
| Types of participants.....                                                      | 8  |
| Types of TENS interventions .....                                               | 9  |
| Non-invasive.....                                                               | 9  |
| Type of TENS Device.....                                                        | 9  |
| TENS Technique .....                                                            | 9  |
| Determining the primary TENS intervention .....                                 | 9  |
| Dosage and Regimen .....                                                        | 10 |
| TENS alone or as adjunct .....                                                  | 10 |
| Evaluation of TENS Treatment Effects .....                                      | 10 |
| Placebo comparators .....                                                       | 10 |
| No treatment or waiting list control comparators .....                          | 10 |
| Standard of care comparators .....                                              | 10 |
| Other treatment comparators .....                                               | 11 |
| Reviewer Aide memoire and Operational Checklist for Eligibility Screening ..... | 12 |

|    |                                                                                                 |    |
|----|-------------------------------------------------------------------------------------------------|----|
| 1  |                                                                                                 |    |
| 2  |                                                                                                 |    |
| 3  | A. Screening of Titles/Abstracts .....                                                          | 12 |
| 4  | B. Screening of Full Reports .....                                                              | 12 |
| 5  | C. Reasons for exclusion codes .....                                                            | 13 |
| 6  |                                                                                                 |    |
| 7  | Reviewer Aide memoire and Operational Checklist for Extracting Study Characteristics of study.. | 14 |
| 8  |                                                                                                 |    |
| 9  | Methods to Assess Risk of bias .....                                                            | 15 |
| 10 |                                                                                                 |    |
| 11 | Description of operational approaches to assess risk of bias in included studies.....           | 15 |
| 12 |                                                                                                 |    |
| 13 | Selection bias .....                                                                            | 15 |
| 14 | Performance bias .....                                                                          | 15 |
| 15 | Attrition bias .....                                                                            | 16 |
| 16 | Reporting bias .....                                                                            | 16 |
| 17 | Sample size.....                                                                                | 16 |
| 18 | Statement that sample size was estimated a priori.....                                          | 16 |
| 19 |                                                                                                 |    |
| 20 | Reviewer Aide Memoire and Operational Checklist for Assessment of Risk of Bias.....             | 17 |
| 21 |                                                                                                 |    |
| 22 | Cochrane RoB aide memoire annotated for our study on TENS .....                                 | 20 |
| 23 |                                                                                                 |    |
| 24 | Measures and Analysis of treatment effect.....                                                  | 27 |
| 25 |                                                                                                 |    |
| 26 | Evaluation of Pain Outcomes: Description of principles and operational procedures.....          | 27 |
| 27 |                                                                                                 |    |
| 28 | Primary Pain Outcomes .....                                                                     | 27 |
| 29 | Secondary Pain Outcomes .....                                                                   | 27 |
| 30 |                                                                                                 |    |
| 31 | Evaluation of Adverse Events: Description of principles and operational procedures .....        | 27 |
| 32 | Unit of analysis issues .....                                                                   | 28 |
| 33 | Dealing with missing data .....                                                                 | 28 |
| 34 | Data synthesis.....                                                                             | 28 |
| 35 |                                                                                                 |    |
| 36 | Assessment of heterogeneity .....                                                               | 29 |
| 37 |                                                                                                 |    |
| 38 | Subgroup Analyses: Descriptions of the principles and operational procedures.....               | 29 |
| 39 | Subgroup analyses: Interpreting the findings.....                                               | 30 |
| 40 | Reporting (Publication) Biases: Descriptions of operational procedures.....                     | 30 |
| 41 | Quality of the evidence.....                                                                    | 32 |
| 42 |                                                                                                 |    |
| 43 | SECTION 2 – SUPPLEMENTARY DETAILS OF FINDINGS OF THE ANALYSES .....                             | 33 |
| 44 |                                                                                                 |    |
| 45 | Results of the search.....                                                                      | 33 |
| 46 |                                                                                                 |    |
| 47 | Management of multiple records (secondary reports) of one RCT .....                             | 33 |
| 48 | Management of multiple samples within one report.....                                           | 33 |
| 49 | Management of errors detected in previous meta-analyses .....                                   | 33 |
| 50 |                                                                                                 |    |
| 51 | Description of reasons for excluding studies.....                                               | 34 |
| 52 |                                                                                                 |    |
| 53 | Violations of criteria for ‘standard TENS’ .....                                                | 34 |
| 54 | Violations of criteria for appropriate body site for TENS.....                                  | 34 |
| 55 | Violations of criteria for adult participants.....                                              | 35 |
| 56 |                                                                                                 |    |
| 57 | Studies Awaiting Classification .....                                                           | 35 |
| 58 |                                                                                                 |    |
| 59 | Description of Included RCTs .....                                                              | 35 |
| 60 |                                                                                                 |    |

|    |                                                                          |    |
|----|--------------------------------------------------------------------------|----|
| 1  |                                                                          |    |
| 2  |                                                                          |    |
| 3  | Characteristics of included trials.....                                  | 35 |
| 4  | Characteristics of TENS interventions.....                               | 36 |
| 5  | Characteristics of Outcome Measures.....                                 | 38 |
| 6  |                                                                          |    |
| 7  |                                                                          |    |
| 8  | Description of Risk of Bias Assessment.....                              | 39 |
| 9  | Overall Risk of Bias.....                                                | 39 |
| 10 | Randomisation and Allocation (selection bias).....                       | 39 |
| 11 | Blinding (performance bias and detection bias).....                      | 39 |
| 12 | Incomplete outcome data (attrition bias).....                            | 40 |
| 13 | Selective reporting (reporting bias).....                                | 40 |
| 14 | Sample size.....                                                         | 40 |
| 15 | Sample size estimation.....                                              | 40 |
| 16 |                                                                          |    |
| 17 |                                                                          |    |
| 18 |                                                                          |    |
| 19 |                                                                          |    |
| 20 | TENS versus placebo: Analysis of effects.....                            | 41 |
| 21 | Outcome: Pain intensity - expressed as mean (continuous) data.....       | 41 |
| 22 | Subgroup and sensitivity analyses – Methodological Characteristics.....  | 43 |
| 23 | Subgroup – Pain Characteristics.....                                     | 46 |
| 24 | Plausibility Pain Characteristics - subgroup findings.....               | 52 |
| 25 | Analysis of Publication Bias - TENS vs Placebo.....                      | 52 |
| 26 | Outcome: >30% reduction in pain.....                                     | 54 |
| 27 | Outcome: >50% reduction in pain (i.e., substantial pain relief).....     | 54 |
| 28 |                                                                          |    |
| 29 | TENS versus no treatment - Analysis of effects.....                      | 55 |
| 30 | Outcome: Pain intensity - expressed as mean (continuous) data.....       | 55 |
| 31 | Analysis of publication bias – TENS vs No Treatment.....                 | 55 |
| 32 | Outcome: >30% reduction in pain.....                                     | 56 |
| 33 | Outcome: >50% reduction in pain.....                                     | 56 |
| 34 |                                                                          |    |
| 35 | TENS versus standard of care - Analysis of effects.....                  | 57 |
| 36 | Outcome: Pain intensity - expressed as mean (continuous) data.....       | 57 |
| 37 | Analysis of publication bias – TENS vs SoC.....                          | 58 |
| 38 | Outcome: >30% reduction in pain.....                                     | 58 |
| 39 | Outcome: >50% reduction in pain.....                                     | 58 |
| 40 |                                                                          |    |
| 41 | TENS versus Other Treatments - Analysis of effects.....                  | 59 |
| 42 | Outcome: Pain intensity - expressed as mean (continuous) data.....       | 59 |
| 43 | Analysis of publication bias – TENS vs. Other treatment.....             | 61 |
| 44 | Outcome: >30% reduction in pain.....                                     | 61 |
| 45 | Outcome: >50% reduction in pain.....                                     | 61 |
| 46 |                                                                          |    |
| 47 |                                                                          |    |
| 48 | High frequency TENS versus low frequency TENS - Analysis of effects..... | 62 |
| 49 | Outcome: Pain intensity - expressed as mean (continuous) data.....       | 62 |
| 50 | Analysis of publication bias – High vs. low frequency TENS.....          | 62 |
| 51 | Outcome: >30% reduction in pain.....                                     | 62 |
| 52 |                                                                          |    |
| 53 |                                                                          |    |
| 54 |                                                                          |    |
| 55 |                                                                          |    |
| 56 |                                                                          |    |
| 57 |                                                                          |    |
| 58 |                                                                          |    |
| 59 |                                                                          |    |
| 60 |                                                                          |    |

|    |                                                                                  |    |
|----|----------------------------------------------------------------------------------|----|
| 1  |                                                                                  |    |
| 2  |                                                                                  |    |
| 3  | Outcome: >50% reduction in pain .....                                            | 63 |
| 4  | Adverse events - Analysis of effects .....                                       | 64 |
| 5  | Outcome: Relative Risk .....                                                     | 64 |
| 6  | Plausibility: Minor and infrequent adverse events from TENS.....                 | 65 |
| 7  |                                                                                  |    |
| 8  | SECTION 3 - Potential biases in the review process.....                          | 66 |
| 9  |                                                                                  |    |
| 10 | Search strategy and screening process - Limitations.....                         | 66 |
| 11 | Effects size estimates - Limitations in the analysis (confounding factors) ..... | 66 |
| 12 |                                                                                  |    |
| 13 | Sample size.....                                                                 | 66 |
| 14 | Quality of reporting - observations.....                                         | 66 |
| 15 | Trial Design - Pragmatic and Exploratory.....                                    | 66 |
| 16 | Cross-over studies - Sensitivity analysis.....                                   | 66 |
| 17 | Appropriateness of TENS .....                                                    | 67 |
| 18 | Measurement time points .....                                                    | 67 |
| 19 | Contamination .....                                                              | 67 |
| 20 | Risk of Performance Bias (blinding participant).....                             | 68 |
| 21 | Adverse events - Limitations in the analysis.....                                | 68 |
| 22 |                                                                                  |    |
| 23 | SECTION 4 - Certainty and Quality of Evidence .....                              | 69 |
| 24 |                                                                                  |    |
| 25 | GRADE Methodology .....                                                          | 69 |
| 26 | GRADE: Summary of Findings .....                                                 | 70 |
| 27 | TENS versus Placebo .....                                                        | 70 |
| 28 | TENS versus No Treatment .....                                                   | 71 |
| 29 | TENS versus Standard of Care (SoC) .....                                         | 72 |
| 30 | TENS versus Other Treatment.....                                                 | 72 |
| 31 | High Frequency versus Low Frequency TENS .....                                   | 73 |
| 32 | Adverse events.....                                                              | 73 |
| 33 |                                                                                  |    |
| 34 | SECTION 5 – Supplementary Detail to Support Conclusions .....                    | 74 |
| 35 |                                                                                  |    |
| 36 | Overall completeness and applicability of evidence .....                         | 74 |
| 37 | Predominance of in-clinic RCTs.....                                              | 74 |
| 38 | Paucity of long-term follow-up .....                                             | 74 |
| 39 | Paucity of RCTs on prevalent chronic pain conditions.....                        | 74 |
| 40 | Follow-up analyses emerging from this review are:.....                           | 74 |
| 41 | Plausibility of Findings.....                                                    | 75 |
| 42 | Physiological Plausibility .....                                                 | 75 |
| 43 | Clinical Plausibility.....                                                       | 75 |
| 44 | Agreements and disagreements with other studies or reviews.....                  | 75 |
| 45 | Inconsistency in clinical guidelines .....                                       | 76 |
| 46 | Cost-benefit .....                                                               | 76 |
| 47 |                                                                                  |    |
| 48 | Summary of Conclusions.....                                                      | 76 |
| 49 |                                                                                  |    |
| 50 |                                                                                  |    |
| 51 |                                                                                  |    |
| 52 |                                                                                  |    |
| 53 |                                                                                  |    |
| 54 |                                                                                  |    |
| 55 |                                                                                  |    |
| 56 |                                                                                  |    |
| 57 |                                                                                  |    |
| 58 |                                                                                  |    |
| 59 |                                                                                  |    |
| 60 |                                                                                  |    |

1  
2  
3 Implications for practice ..... 76  
4 For people with pain ..... 77  
5 For clinicians..... 77  
6 For policymakers..... 77  
7 For funders..... 77  
8 Implications for research ..... 77  
9  
10  
11  
12 References in Supplementary Appendix..... 79  
13  
14  
15  
16  
17  
18  
19  
20  
21  
22  
23  
24  
25  
26  
27  
28  
29  
30  
31  
32  
33  
34  
35  
36  
37  
38  
39  
40  
41  
42  
43  
44  
45  
46  
47  
48  
49  
50  
51  
52  
53  
54  
55  
56  
57  
58  
59  
60

For peer review only

## SECTION 1 – SUPPLEMENTARY DETAILS OF METHODS

The protocol for this study has been published [1] and is available from <https://bmjopen.bmj.com/content/9/10/e029999>. An abridged version of the protocol with operational decisions and key findings are described in this Supplementary Material.

The protocol was registered on PROSPERO (CRD42019125054).

This systematic review and meta-analysis were conducted in accordance with

- Preferred Reporting Items for Systematic Review and Meta-analysis (PRISMA) [2]
- Cochrane Collaboration of Systematic Reviews [3]
- Grading and Recommendations, Assessment, Development and Evaluation (GRADE)[4].

### Search Strategy

#### Search methods for identification of studies

We conducted a literature search to identify RCTs published from date of inception of the database and screened them against our eligibility criteria for inclusion in our review. The purpose of the search was to provide comprehensive coverage of a wide variety of pain conditions (broadly based on the World Health Organisation's (WHO) International Classification of Disease (ICD-11) categories for acute and for chronic pain), at various stages (e.g., acute, chronic) and from various settings (e.g., palliative, community, primary, secondary, tertiary).

In addition, we conducted a literature search to identify systematic reviews on TENS and screened them against our eligibility criteria for the inclusion of previously published systematic reviews in our review. We planned to undertake a descriptive analysis of findings but did not plan to evaluate or quality-assess these systematic reviews. We harvested RCTs from these systematic reviews and mapped inclusion of RCTs across previous systematic reviews.

#### Electronic searches

We searched the following electronic databases using a combination of controlled vocabulary, i.e., medical subject headings (MeSH) and free-text terms to identify published RCTs and systematic reviews from inception to the date of the search

- Cochrane Library (CENTRAL);
- MEDLINE (via PubMed);
- Embase (via OVID);
- CINAHL (via EBSCO);
- PsycINFO (via EBSCO);
- LILACS (via Bireme);
- PEDRO;
- Web of Science;
- AMED (via OVID);
- SPORTDiscus (via EBSCO).

We tailored searches to the individual databases by adapting the MEDLINE search strategy for the other databases listed. There were no language restrictions and we identified all relevant RCTs irrespective of language and translated articles where possible. We also conducted a literature search to identify systematic reviews on TENS and harvested any outstanding RCTs. We did not search trial registries nor seek data from any unpublished studies identified. We contacted authors



via email to clarify issues relating to inclusion, risk of bias and missing data. The original search was conducted during July 2019; this was updated on 17 May 2020.

### **MEDLINE Search Terms for RCTs**

1. EXP Transcutaneous Electric Nerve Stimulation/
- 2 TENS.ti,ab
- 3 TNS.ti,ab
- 4 ENS.ti,ab
- 5 transcutaneous electric\* nerve stimulation.ti,ab.
- 6 transcutaneous nerve stimulation.ti,ab
- 7 electric\* nerve stimulation.ti,ab
- 8 electrostimulation therap\*.ti,ab
- 9 electro-stimulation therap\*.ti,ab.
- 10 electric\* nerve therap\*.ti,ab
- 11 electroanalgesi\*.ti,ab
- 12 transcutaneous electric\* stimulation.ti,ab.
- 13 TES.ti,ab
- 14 or/1-13
- 15 Pain
- 16 Randomized controlled trial. pt.
- 17 Controlled clinical trial.pt.
- 18 16 OR 17
- 19 14 AND 15 AND 18

### **MEDLINE Search Terms for systematic reviews**

1. EXP Transcutaneous Electric Nerve Stimulation/
- 2 TENS.ti,ab
- 3 TNS.ti,ab
- 4 ENS.ti,ab
- 5 transcutaneous electric\* nerve stimulation.ti,ab.
- 6 transcutaneous nerve stimulation.ti,ab
- 7 electric\* nerve stimulation.ti,ab
- 8 electrostimulation therap\*.ti,ab
- 9 electro-stimulation therap\*.ti,ab.
- 10 electric\* nerve therap\*.ti,ab
- 11 electroanalgesi\*.ti,ab
- 12 transcutaneous electric\* stimulation.ti,ab.
- 13 TES.ti,ab
- 14 or/1-13
- 15 Pain
- 16 Systematic review. Pt.
- 17 Meta-analysis.pt.
- 18 16 OR 17
- 19 14 AND 15 AND 18

## Eligibility Screening

### Description of screening for eligibility

#### *Selection of studies*

Two review authors (PGW and MIJ) independently screened records to identify RCTs. We removed duplicates and eliminated records that clearly did not satisfy the inclusion criteria. Full text reports of potentially eligible RCTs were obtained and screened for eligibility by two review authors (PGW and MIJ). Reasons for exclusion were documented and coded against broad exclusion criteria.

Two review authors (PGW and MIJ) screened records to identify systematic reviews on TENS and read full text reports to create a list of RCTs included in each systematic review. Disagreements at any stage of the process were resolved by consensus using a third review author as arbiter (CAP).

We did not anonymise records of systematic reviews or RCTs in any way before assessment. We created a PRISMA flow chart [2].

#### *Types of outcome measures*

We included RCTs that measured pain using standard subjective scales (numerical rating scale (NRS) or visual analogue scale (VAS) for pain intensity or pain relief, or both. We included measures of pain at rest and pain on movement. We also planned to extract other pain measures assessed using condition specific questionnaires (e.g., Western Ontario and McMaster Universities Osteoarthritis Index (WOMAC), Fibromyalgia Impact Questionnaire (FIQ)). We extracted outcome measurement data before, during, and after the intervention, where data was available.

We extracted data for adverse effects of any type or severity as descriptions from participants and number of withdrawals and/or stopping of treatment. Serious adverse events were defined as untoward medical occurrence or effect resulting in death, threat to life, hospitalisation, significant disability or incapacity, congenital anomaly, or birth defect (see Section Methods of Analysis: Adverse Events). We also planned to extract data on clinical status or health-related quality of life and treatment satisfaction.

#### *Types of studies*

We included randomised controlled trials (RCTs) of TENS treatment for acute or chronic pain of any origin. We excluded studies that were non-randomised, case reports and clinical observations. We included studies providing the author used the term 'randomisation' in the report. Quasi-RCTs with sequential allocation to groups were excluded. It was noted that some of these studies have been included in previous systematic reviews (e.g., quasi-RCT by [5]).

We included parallel group and crossover trial designs. We included single treatment interventions without follow-up and planned to conduct a subgroup analysis of RCTs that delivered at least two weeks of treatment and had a duration of at least eight weeks as these are considered as best practice. We required full journal publication of a full trial report and did not include, online clinical trial results, summaries of otherwise unpublished clinical trials, abstracts or letters.

#### *Types of participants*

We pre-specified that we would include RCTs of adult participants aged 18 years or above with any type of clinical pain, but subsequently decided to include a few RCTs that had a participants with a minimum age of 16 years because more than 95% of the sample were at least 18 years. All RCTs that had at least one participant under 16 years of age (i.e., children) were excluded.

### **Types of TENS interventions**

We included all RCTs that administered TENS as non-invasive electrical stimulation of the skin with the intention of stimulating peripheral nerves to alleviate pain using a standard TENS device [6,7].

#### **Non-invasive**

We included RCTs that administered TENS across the intact surface of the skin using surface electrodes and excluded invasive nerve stimulation techniques such as percutaneous electrical nerve stimulation and electro-acupuncture.

#### **Type of TENS Device**

We only included RCTs that evaluated TENS using a 'standard TENS device' defined as "... a portable, battery-powered generator of monophasic or biphasic pulsed electrical current delivered in a repetitive manner, with a maximum peak-to-peak amplitude of approximately 60 milliamperes (mA) into a 1 kilohm load." p12 [6] and regardless of the device manufacturer.

We excluded RCTs that did not use pulsed electrical currents or administered 'TENS-like' currents not considered output specifications of a standard TENS device (e.g., interferential current, microcurrent), even if the trial authors described the intervention as TENS. We excluded RCTs where the primary intention of TENS was not to stimulate peripheral nerves to alleviate pain (e.g., TENS for bladder dysfunction, constipation, dementia)[7] [6]. We excluded TENS delivered using single probe electrodes (i.e., TENS pens) or using matrix electrodes and electrode arrays. We included TENS administered using electrodes integrated into garments such as knee braces, cuffs, gloves and/or socks providing they did not deviate from the exclusions described previously.

#### **TENS Technique**

We included RCTs irrespective of the term used to describe the type of TENS technique (e.g., conventional TENS, acupuncture-Like TENS, high-frequency-low-intensity, low-frequency-high intensity, etc.).

We included RCTs where electrodes were located at (a) the site of pain or (b) over nerve bundles proximal (or near) to the site of pain. We included TENS delivered at acupuncture points only if the point was lying over nerve bundles proximal (or near) to the site of pain.

We included RCTs irrespective of the current amplitude of TENS and/or participant-reported TENS intensity. We planned to exclude RCTs if TENS was administered to areas of the body that were not sensate although there were no instances of this. We considered participant-reported strong but comfortable TENS sensations as optimal and used this as our primary TENS comparison group. We planned to conduct a subgroup analysis to compare TENS at intensities described as 'strong' (optimal) versus those described as 'mild', 'faint', or 'barely perceptible' (sub-optimal), although none of our primary TENS comparisons fell into this latter category.

We included RCTs that delivered TENS at intensities above motor threshold providing TENS was administered using a standard TENS device with the primary intention of stimulating peripheral nerves to alleviate pain.

We included RCTs that administered TENS using pulse frequencies no more than 250 pulses per second (pps) and pulse durations no more than 1 millisecond (1000us). We suspected that some reports had notation errors of SI units expressing microseconds as ms (e.g., 200ms) instead of us (e.g., 200 microseconds). We included any type of pulse pattern.

#### **Determining the primary TENS intervention**

We used high frequency pulses delivered using a continuous pulse pattern as our primary TENS comparison group, followed by (i) low frequency TENS delivered either as low frequency pulses or low frequency bursts (trains) of high frequency pulses delivered using a burst pattern of stimulation continuous pulse pattern, (ii) modulated frequency TENS, or (iii) alternating (switching) frequency TENS.

### ***Dosage and Regimen***

We included RCTs that administered TENS for any duration or regularity of treatment. We included TENS that was administered by a therapist and/or self-administered by study participants.

### ***TENS alone or as adjunct***

We included TENS administered as a sole treatment or in combination with other treatments. We excluded RCTs where it was not possible to isolate the effects of TENS from other treatments.

### **Evaluation of TENS Treatment Effects**

We included RCTs that evaluated TENS versus:

- placebo TENS (e.g., sham (no current) TENS device);
- no treatment or waiting list control;
- standard of care (SoC); and
- another treatment, both pharmacological and non-pharmacological.

### ***Placebo comparators***

We included any type of placebo in our analysis but prioritised findings comparing TENS with a placebo (sham) TENS device. Such devices are identical in appearance to the real TENS device but have been modified so that the patient receives no electrical current; or pulses of current that fade to 0mA within one minute [8,9]; or pulses with excessively long inter-stimulus intervals to render them of no physiological consequence. Another approach has been to administer very low amplitude current that is below sensory detection threshold. We included all such approaches and conducted a subgroup analysis of the different approaches.

Ensuring the credibility and blinding of placebo TENS can be problematic because it is not possible to blind participants to TENS sensation. It is possible, however, to generate uncertainty about allocation to active and inactive TENS [10]. We considered the use of a sham TENS device coupled with appropriate briefing information as an adequate method of blinding. We described measures of the adequacy of blinding and/or the perception of participants about the credibility of the placebo intervention in terms of a 'functioning' device on a study by study basis.

### ***No treatment or waiting list control comparators***

We considered an intervention as 'no treatment' if we were assured that the participants did not receive any other 'active' treatment. We did not include interventions described as controls that allowed patients any type of active treatment, including medication or exercise. Thus, RCTs that compared TENS in combination with a pharmacological agent versus a control consisting of the pharmacological agent on its own were not included in this analysis.

### ***Standard of care comparators***

We considered an intervention as 'standard of care' if trial authors considered the intervention or intervention(s) to be fully or part of 'common', 'routine', or 'standard' practice and/or care, irrespective of whether authors explicitly named the intervention as 'standard of care'. Interventions were either TENS compared head-to-head with a SoC intervention (i.e., TENS vs SoC) or TENS as an adjunct to a SoC intervention (i.e., TENS combined with SoC vs SoC alone).

To avoid 'double-counting' and unit-of-analysis errors, we did not enter several interventions into the same meta-analysis from a study having more than one treatment comparator as this would result in multiple counts of the primary TENS group). There were no instances of this for SoC.

### ***Other treatment comparators***

We considered an intervention as 'other treatment' if participants received a comparison intervention that had not been categorised as standard of care (SoC). The purpose of the analysis was to undertake a head-to-head comparison of TENS versus another treatment, so we extracted data that enabled isolation of effects between TENS and another treatment providing any additional care and/or treatment was standardised between groups, e.g., in instances when patients were also given pharmacological, exercise, or physiotherapy-based treatment. The nature of comparisons was either TENS compared head-to-head with another treatment either alone or on a background of care standardised between groups.

To avoid 'double-counting' and unit-of-analysis errors, we pre-specified that we would not enter several interventions into the same meta-analysis from a study having more than one treatment comparator as this would result in multiple counts of the primary TENS group. Unfortunately, there were many instances of a study having more than one treatment comparator for the other treatment analysis.

We decided not to undertake a subgroup analysis comparing Other Treatments because

- This would result in multiple counts of the primary TENS group
- Of the wide variability in the type of interventions.
- None of these other treatment subgroups met our criteria for precision of at least 500 pooled data points in a treatment arm.

We did produce a Forest plot that included multiple treatments from the same study for visual inspection. Also, we calculated overall treatment effect sizes for Other Treatments that had at least 100 pooled data points in each trial arm. These included:

- Interferential therapy
- Pharmacology
- Ultrasound
- Acupuncture and electroacupuncture
- Diadynamic currents
- Electrical muscle stimulation
- Heat therapy
- Percutaneous electrical nerve stimulation

We decided not to report these in the final report because all were below the threshold for pooled data precision. We did not appraise certainty of evidence using GRADE.

## Reviewer Aide memoire and Operational Checklist for Eligibility Screening

### A. Screening of Titles/Abstracts

Do not carry forward if title/abstract indicates ...

1. Definitely NOT non-invasive electrical stimulation
2. Definitely NOT humans
3. Definitely NOT adults with clinical condition
4. Definitely NOT a randomised controlled trial (RCTs)
5. Definitely NOT clinical pain (acute or chronic)
6. Definitely NOT TENS
  - carry forward if on electrotherapy and extract RCTs on TENS – include reports with TENS in scope but fail to identify any TENS SRs
  - carry forward if uncertain whether SR focussed on 'standard TENS' (e.g., TENS characteristics (type of currents), type and location of electrodes (acupoints, single probe electrode etc.) and/or type of device (i.e., TENS-like))

Action

Code gross reasons for 'not carried forward' into the master Excel file

Obtain Full Reports

### B. Screening of Full Reports

Do not carry forward if Full Report indicates ...

1. Definitely NOT non-invasive electrical stimulation
2. Definitely NOT humans
3. Definitely NOT adults with clinical condition
4. Definitely NOT a randomised controlled trial (RCTs)
5. Definitely NOT clinical pain (acute or chronic)
6. Definitely NOT TENS
  - carry forward if on electrotherapy and extract RCTs on TENS – include reports with TENS in scope but fail to identify any TENS SRs
  - carry forward if uncertain whether SR focussed on 'standard TENS' (e.g., TENS characteristics (type of currents), type and location of electrodes (acupoints, single probe electrode etc.) and/or type of device (i.e., TENS-like))
7. TENS definitely NOT delivered to site of pain or over relevant nerve bundle (i.e., TENS on distal/remote sites)
8. Definitely NOT able to isolate/extract effects due to TENS (combination therapy without appropriate control comparison)
9. TENS treatment given pre-emptively before surgery but not postoperatively whilst patient in pain
10. Other

Screening against specific TENS criteria

Carry forward providing all of the following are met

1. TENS is non-invasive
2. Intention to use TENS to excite peripheral nerves to alleviate pain
3. body sensate
4. participant-reported TENS intensity (irrespective of the current amplitude of TENS)
  - a) strong' (optimal) - 'mild', 'faint', or 'barely perceptible' (sub-optimal)



- 1  
2  
3           b) muscle twitches if primary goal to alleviate pain  
4  
5       5. pulse frequencies less than 250 pulses per second  
6       6. pulse durations less than 1 millisecond  
7       7. any type of pulse pattern  
8       Carry forward irrespective of the duration or regularity of treatment  
9

10       Actions:

11       Code gross reasons for Excluded into the master Excel file

12       Add to Table of Exclusion with reasons

13       Add to Table of Awaiting Classification with reasons  
14  
15

16       **C. Reasons for exclusion codes**

- 17  
18       1. Unrelated to non-invasive electrical stimulation  
19       2. Definitely not humans  
20           a. TENS but definitely not humans  
21       3. Definitely not adult patients with clinical condition  
22           a. TENS but healthy humans  
23           b. NOT adults (<18 years)  
24       4. Definitely not RCT  
25           a. TENS but definitely not RCT  
26       5. Definitely not pain  
27           a. TENS but definitely no pain outcomes  
28           b. Not using intervention as treatment for pain (pain not main outcome measured)  
29       6. Definitely not standard TENS  
30           a. Not a standard TENS device (i.e., NMES/IFT/TEAS)  
31           b. Not standard TENS electrodes  
32           c. Not standard TENS electrical  
33           d. Invasive technique  
34       7. TENS on remote acupuncture points – none of the acupuncture points are at site of pain  
35       8. Unable to isolate TENS effects  
36           a. due to an integrated TENS + another modality device  
37           b. due to combination therapy without a comparable combination therapy without TENS or  
38           with a sham TENS  
39       9. TENS treatment given pre-emptively before general anaesthesia surgery and pain recorded  
40       postoperatively but TENS not given postoperatively whilst patient in pain  
41       10. Other  
42  
43  
44  
45  
46  
47  
48  
49  
50  
51  
52  
53  
54  
55  
56  
57  
58  
59  
60

**Reviewer Aide memoire and Operational Checklist for Extracting Study Characteristics of study**

- Study Design
  - Cross-over, parallel-group,
- Setting
- Study duration
- Methods of sequence generation and allocation concealment, blinding, intention-to-treat or per protocol analysis
- Study Participants
  - Age, gender
  - Pain diagnosis, duration of pain and symptoms
- Sample size
- Active and comparator groups
  - TENS
    - Type of TENS device (e.g., standard or ‘TENS-like’)
    - Electrode placement
    - Electrical characteristics of TENS (pulse frequency, waveform, amplitude/intensity, duration)
    - Dosage (treatment time and frequency)
    - Setting (where TENS was applied and by whom)
    - Adverse effects
  - Comparison group(s)
    - Type
    - Method of delivery (e.g., if placebo TENS then details of electrode placement, characteristics of placebo TENS (pulse frequency, waveform, amplitude/intensity, duration)
    - Dosage (treatment time and frequency)
    - Setting (where it was applied and by whom)
    - Adverse effects
- Concomitant treatments
  - Pharmacological and non-pharmacological
- Outcomes
  - Type
  - Time points used, including follow-up
  - Withdrawals
  - Adverse and serious adverse effects
  - Other
- Sponsorship, country of origin, conflict of interest statements.

## Methods to Assess Risk of bias

### Description of operational approaches to assess risk of bias in included studies

Two review authors (CAP and MIJ) independently assessed risk of bias for each study against criteria outlined in the Cochrane Handbook for Systematic Reviews of Interventions for selection bias, performance and detection bias, attrition bias, reporting bias [11]. In addition, we assessed the risk of bias associated with the sample size of the primary TENS comparison trial arm, and whether sample size had been determined *a priori*.

We developed an aide memoire adapted for use with TENS to facilitate consistency in the decision-making process.

### Selection bias

This includes random allocation sequence generation and allocation concealment. We *excluded* studies that used a non-random process such as odd or even date of birth; hospital or clinic record number (i.e., quasi-randomised). We awarded high risk when there was no attempt to conceal treatment allocation or when allocation was breached (e.g., open list)

### Performance bias

There is a longstanding debate about the fidelity of blinding participants and therapists in studies of TENS, impacting on judgements related to the risk of performance bias. Cochrane criteria for judging performance bias is problematic because judgment is an amalgamation of two items, i.e., blinding of participants and blinding of personnel (e.g., therapist). We decided to assess blinding of participants and personnel (therapists) separately.

We argue that blinding of participants is the critical item. It is not possible to blind participants to TENS sensation. It is, however, possible to create uncertainty as to whether a real or fake treatment intervention has been received by informing participants that some types of electrical stimulation devices do not produce sensation during stimulation (e.g., microcurrent therapy), thus creating doubt about the necessity of electrical paraesthesiae during treatment (for detailed discussions see [6,8]).

We operationalised decisions about performance bias for *participants* as follows:

- Low risk of performance bias if the report provided a description of an attempt to blind participants (or create uncertainty about active intervention) using a placebo device, with no indication that such blinding was compromised. Thus, we categorised all RCTs that administered placebo TENS using a sham device that was identical in appearance to the active TENS intervention as low risk, providing there was sufficient operational details in the report to assure us there was sufficient operational details in the report to assure us that blinding had not been compromised. Likewise, we categorise all RCTs that compared two active TENS interventions as low risk if devices were identical in appearance and there were sufficient operational details in the report to assure us that blinding had not been compromised.
- We awarded a high risk of bias if the report stated that participants were not blinded (or blinding was clearly compromised) or if interventions were clearly different (e.g., TENS versus exercise).
- We awarded unclear bias to all other permutations

We operationalised decisions about performance bias for *personnel* (e.g., therapists/researchers) as follows:

- Low risk of performance bias if the report provided a description of an attempt to blind personnel to the control intervention (including a placebo device), with no indication that such blinding was compromised. We only categorised RCTs that administered placebo TENS using a sham device as low risk if there were sufficient operational details in the report to assure us that blinding not been compromised – a sham TENS device identical in appearance to the active TENS intervention would be insufficient – there would need to be additional procedural information relating to blinding of personnel. Likewise, we categorise all RCTs that compared two active TENS interventions as low risk if devices were identical in appearance and there were sufficient operational details in the report to assure us that blinding had not been compromised.
- We awarded a high risk of bias if the report stated that personnel were not blinded (or blinding was clearly compromised) or if interventions were clearly different (e.g., TENS versus exercise).
- We awarded unclear bias to all other permutations; insufficient information to permit judgement of low/high risk of bias

We operationalised decisions about performance bias for assessor (*detection bias*) as follows:

- Low risk of bias – stated that outcome assessor blinded to participants' allocated intervention and unlikely that blinding broken (i.e., different personnel to that allocating and/or treating participants)
- Unclear risk of bias - insufficient information to permit judgement of low/high risk of bias
- High risk of bias - outcome assessor (including 'participants' with respect to self-report outcomes) un-blinded to participants' allocated intervention OR outcome assessor blinded to allocated intervention but likely that blinding was broken

Blinding can be monitored by asking participants about the plausibility and credibility of treatment e.g., '*... do you believe the device (either fake or real) was functioning properly?*' [10]. There were very few studies that monitored blinding.

#### **Attrition bias**

We awarded low risk of bias for incomplete outcome data (attrition bias) if it was reported that all participants completed the study with no missing outcome data or missing outcome data was balanced across the groups with similar reasons for loss.

#### **Reporting bias**

We awarded low risk of selective reporting (reporting bias) to RCTs that faithfully reported an analysis of data in the Results section from a description of prespecified outcomes in the Methods and/or had previously published a protocol registered on ClinicalTrials.gov and described any deviations from protocol.

#### **Sample size**

The influence of small study samples was assessed using the risk of bias criterion 'Sample size' according to numbers of participants analysed in the TENS trial arm. We awarded low risk of bias for sample size if the number of participants receiving TENS in the primary comparison trial arm exceeded 199 and awarded a high risk if it was below 50 participants.

#### **Statement that sample size was estimated a priori**

We awarded a low risk of bias if the trial report included a statement and some detail that investigators estimated sample size a priori. We did not attempt to check the validity of power calculations.

## Reviewer Aide Memoire and Operational Checklist for Assessment of Risk of Bias

- Random allocation sequence generation (checking for possible selection bias)
  - Low risk of bias - any truly random process, e.g., random number table; computer random number generator
  - Unclear risk of bias - method used to generate sequence not clearly stated
  - High risk of bias - non-random component in the sequence generation process or non-random approaches

Note: We will exclude studies using a non-random process such as odd or even date of birth; hospital or clinic record number
- Allocation concealment (checking for possible selection bias)
  - Low risk of bias - e.g., telephone or central randomization; consecutively numbered, sealed, opaque envelopes
  - Unclear risk of bias - method not clearly stated
  - High risk of bias - studies that do not conceal allocation (e.g., open list)
- Blinding of participants and blinding of personnel (performance bias)
 

Note: Cochrane criteria for judging performance bias is problematic because judgment is an amalgamation of two items, i.e., blinding of participants and blinding of personnel (e.g., therapist). We will assess these two items separately.

### Blinding of participants

- Low risk - report provided a description of an attempt to blind participants (or create uncertainty about active intervention) using a placebo device, with no indication that such blinding was compromised.
  - Placebo TENS device identical in appearance to the active TENS intervention, providing there was sufficient operational details in the report to assure us that blinding had not been compromised.
  - Likewise, we categorise all RCTs that compared two active TENS interventions as low risk if devices were identical in appearance and there were sufficient operational details in the report to assure us that blinding had not been compromised.
- High risk - the report stated that participants were not blinded (or blinding was clearly compromised) or if interventions were clearly different (e.g., TENS versus exercise).
- Unclear bias to all other permutations

### Blinding personnel (e.g., therapists/researchers) as follows:

- Low risk - description of an attempt to blind personnel to the control intervention (including a placebo device), with no indication that such blinding was compromised. We only categorised RCTs that administered placebo TENS using a sham device as low risk if there were sufficient operational details in the report to assure us that blinding not been compromised – a sham TENS device identical in appearance to the active TENS intervention would be insufficient – there would need to be additional procedural information relating to blinding of personnel. Likewise, we categorise all RCTs that compared two active TENS interventions as low risk if devices were identical in appearance and there were sufficient operational details in the report to assure us that blinding had not been compromised.
- High risk - if the report stated that personnel were not blinded (or blinding was clearly compromised) or if interventions were clearly different (e.g., TENS versus exercise).

- 1  
2  
3  
4  
5  
6  
7  
8  
9  
10  
11  
12  
13  
14  
15  
16  
17  
18  
19  
20  
21  
22  
23  
24  
25  
26  
27  
28  
29  
30  
31  
32  
33  
34  
35  
36  
37  
38  
39  
40  
41  
42  
43  
44  
45  
46  
47  
48  
49  
50  
51  
52  
53  
54  
55  
56  
57  
58  
59  
60
- Unclear risk - all other permutations; insufficient information to permit judgement of low/high risk of bias
  - Blinding of assessor (*detection bias*)
    - Low risk of bias – stated that outcome assessor blinded to participants' allocated intervention and unlikely that blinding broken (i.e., different personnel to that allocating and/or treating participants)
    - Unclear risk of bias - insufficient information to permit judgement of low/high risk of bias
    - High risk of bias - outcome assessor (including 'participants' with respect to self-report outcomes) un-blinded to participants' allocated intervention OR outcome assessor blinded to allocated intervention but likely that blinding was broken
  - Incomplete outcome data (drop-outs)
    - Low risk of bias < 20% drop-out and appears to be random with numbers per group provided along with reasons for drop-out, e.g., full data set
    - Unclear risk of bias - < 20% and unclear if random with numbers per group and reasons for drop-out not described
    - High risk of bias -  $\geq 20\%$  drop-out
  - Incomplete outcome data (protocol violations)
    - Low risk of bias - if participants were analysed in the group to which they were originally assigned
    - Unclear risk of bias - where insufficient information is provided to determine if analysis was per protocol or intention-to-treat
    - High risk of bias - where per protocol analysis was used, where available data were not analysed, or participants' data were included in the group to which they were not originally assigned
  - Selective reporting
    - Low risk of bias - study protocol was available matched Results reported; all pre-specified outcomes were reported in Methods and reported in Results even if study protocol not published
    - Unclear risk of bias - inadequate information to allow judgement of a study to be classified as 'low risk' or 'high risk'
    - High risk of bias - incomplete reporting of specified outcomes. One or more primary outcomes are reported using measurements or analysis that was not pre-specified. One or more of the primary outcomes was not pre-specified. One or more outcomes of interest were reported incompletely and could not be entered into meta-analysis. Results for a key outcome expected to be reported were excluded
  - Size of study (checking for biases confounded by small size)
    - Low risk of bias  $\geq 200$  participants per treatment arm
    - Unclear risk of bias - 50 to 199 participants per treatment arm
    - High risk of bias < 50 participants per treatment arm
  - Estimation of sample size
    - Low risk of bias – statement that estimation made, even if the actual calculation not present
    - Unclear risk of bias – N/A
    - High risk of bias – No statement



1  
2  
3  
4  
5  
6  
7  
8  
9  
10  
11  
12  
13  
14  
15  
16  
17  
18  
19  
20  
21  
22  
23  
24  
25  
26  
27  
28  
29  
30  
31  
32  
33  
34  
35  
36  
37  
38  
39  
40  
41  
42  
43  
44  
45  
46  
47  
48  
49  
50  
51  
52  
53  
54  
55  
56  
57  
58  
59  
60

- Other sources of bias
  - Consider other factors including whether studies were stopped early, there were differences between groups at baseline, the timing of outcome measurement, co-intervention comparability, and funding declarations

For peer review only

**Cochrane RoB aide memoire annotated for our study on TENS**

**RANDOM SEQUENCE GENERATION**

Selection bias (biased allocation to interventions) due to inadequate generation of a randomised sequence.

Criteria for a judgement of 'Low risk' of bias.

The investigators describe a random component in the sequence generation process such as:

- Referring to a random number table;
- Using a computer random number generator;
- Coin tossing;
- Shuffling cards or envelopes;
- Throwing dice;
- Drawing of lots;
- Minimization\*.

\*Minimization may be implemented without a random element, and this is considered to be equivalent to being random.

Criteria for the judgement of 'High risk' of bias.

The investigators describe a non-random component in the sequence generation process. Usually, the description would involve some systematic, non-random approach, for example:

- Sequence generated by odd or even date of birth;
- Sequence generated by some rule based on date (or day) of admission;
- Sequence generated by some rule based on hospital or clinic record number.

Other non-random approaches happen much less frequently than the systematic approaches mentioned above and tend to be obvious. They usually involve judgement or some method of non-random categorization of participants, for example:

- Allocation by judgement of the clinician;
- Allocation by preference of the participant;
- Allocation based on the results of a laboratory test or a series of tests;
- Allocation by availability of the intervention.

Criteria for the judgement of 'Unclear risk' of bias.

Insufficient information about the sequence generation process to permit judgement of 'Low risk' or 'High risk'.

**ALLOCATION CONCEALMENT**

Selection bias (biased allocation to interventions) due to inadequate concealment of allocations prior to assignment.

Criteria for a judgement of 'Low risk' of bias.

Participants and investigators enrolling participants could not foresee assignment because one of the following, or an equivalent method, was used to conceal allocation:

Criteria for the judgement of 'High risk' of bias.

- Central allocation (including telephone, web-based and pharmacy-controlled randomization);
  - Sequentially numbered drug containers of identical appearance;
  - Sequentially numbered, opaque, sealed envelopes.
- Participants or investigators enrolling participants could possibly foresee assignments and thus introduce selection bias, such as allocation based on:
- Using an open random allocation schedule (e.g., a list of random numbers);
  - Assignment envelopes were used without appropriate safeguards (e.g., if envelopes were unsealed or nonopaque or not sequentially numbered);
  - Alternation or rotation;
  - Date of birth;
  - Case record number;
  - Any other explicitly unconcealed procedure

Criteria for the judgement of 'Unclear risk' of bias.

Insufficient information to permit judgement of 'Low risk' or 'High risk'. This is usually the case if the method of concealment is not described or not described in sufficient detail to allow a definite judgement – for example if the use of assignment envelopes is described, but it remains unclear whether envelopes were sequentially numbered, opaque and sealed.

## BLINDING OF PARTICIPANTS

Performance bias due to knowledge of the allocated interventions by participants and personnel during the study.

Criteria for a judgement of 'Low risk' of bias.

- Any one of the following:
- No blinding or incomplete blinding, but the review authors judge that the outcome is not likely to be influenced by lack of blinding;
  - Blinding of participants and key study personnel ensured, and unlikely that the blinding could have been broken.

*Low = Statement blinded and no reason to suggest blinding seriously compromised; or blinding inferred, operational process described and no reason to suggest blinding seriously compromised*

Criteria for the judgement of 'High risk' of bias.

- Any one of the following:
- No blinding or incomplete blinding, and the outcome is likely to be influenced by lack of blinding;

|                                                                                                      |                                                                                                                                                                                                                                                                                                                                                                |
|------------------------------------------------------------------------------------------------------|----------------------------------------------------------------------------------------------------------------------------------------------------------------------------------------------------------------------------------------------------------------------------------------------------------------------------------------------------------------|
| <p>1</p> <p>2</p> <p>3</p> <p>4</p> <p>5</p> <p>6</p> <p>7</p> <p>8</p> <p>9</p> <p>10</p> <p>11</p> | <ul style="list-style-type: none"> <li>Blinding of key study participants and personnel attempted, but likely that the blinding could have been broken, and the outcome is likely to be influenced by lack of blinding.</li> </ul> <p><i>High = Statement that not blinded; or statements suggesting definitely not blinded</i></p>                            |
| <p>12</p> <p>13</p> <p>14</p> <p>15</p> <p>16</p> <p>17</p> <p>18</p> <p>19</p>                      | <p>Criteria for the judgement of 'Unclear risk' of bias.</p> <p>Any one of the following:</p> <ul style="list-style-type: none"> <li>Insufficient information to permit judgement of 'Low risk' or 'High risk';</li> <li>The study did not address this outcome.</li> </ul> <p><i>Unclear = No statement; or blinding inferred but not directly stated</i></p> |

**BLINDING OF PERSONNEL**

Performance bias due to knowledge of the allocated interventions by participants and personnel during the study.

|                                                                                                                                             |                                                                                                                                                                                                                                                                                                                                                                                                                                                                                                                                                                                                                      |
|---------------------------------------------------------------------------------------------------------------------------------------------|----------------------------------------------------------------------------------------------------------------------------------------------------------------------------------------------------------------------------------------------------------------------------------------------------------------------------------------------------------------------------------------------------------------------------------------------------------------------------------------------------------------------------------------------------------------------------------------------------------------------|
| <p>26</p> <p>27</p> <p>28</p> <p>29</p> <p>30</p> <p>31</p> <p>32</p> <p>33</p> <p>34</p> <p>35</p> <p>36</p> <p>37</p> <p>38</p> <p>39</p> | <p>Criteria for a judgement of 'Low risk' of bias.</p> <p>Any one of the following:</p> <ul style="list-style-type: none"> <li>No blinding or incomplete blinding, but the review authors judge that the outcome is not likely to be influenced by lack of blinding;</li> <li>Blinding of participants and key study personnel ensured, and unlikely that the blinding could have been broken.</li> </ul> <p><i>Low = Statement blinded and no reason to suggest blinding seriously compromised; or blinding inferred, operational process described and no reason to suggest blinding seriously compromised</i></p> |
| <p>40</p> <p>41</p> <p>42</p> <p>43</p> <p>44</p> <p>45</p> <p>46</p> <p>47</p> <p>48</p> <p>49</p> <p>50</p> <p>51</p> <p>52</p> <p>53</p> | <p>Criteria for the judgement of 'High risk' of bias.</p> <p>Any one of the following:</p> <ul style="list-style-type: none"> <li>No blinding or incomplete blinding, and the outcome is likely to be influenced by lack of blinding;</li> <li>Blinding of key study participants and personnel attempted, but likely that the blinding could have been broken, and the outcome is likely to be influenced by lack of blinding.</li> </ul> <p><i>High = Statement that not blinded; or statements suggesting definitely not blinded</i></p>                                                                          |
| <p>54</p> <p>55</p> <p>56</p> <p>57</p> <p>58</p> <p>59</p> <p>60</p>                                                                       | <p>Criteria for the judgement of 'Unclear risk' of bias.</p> <p>Any one of the following:</p> <ul style="list-style-type: none"> <li>Insufficient information to permit judgement of 'Low risk' or 'High risk';</li> <li>The study did not address this outcome.</li> </ul> <p><i>Unclear = No statement; or blinding inferred but not directly stated</i></p>                                                                                                                                                                                                                                                       |

**BLINDING OF OUTCOME ASSESSMENT**

Detection bias due to knowledge of the allocated interventions by outcome assessors.

Criteria for a judgement of 'Low risk' of bias.

Any one of the following:

- No blinding of outcome assessment, but the review authors judge that the outcome measurement is not likely to be influenced by lack of blinding;
- Blinding of outcome assessment ensured, and unlikely that the blinding could have been broken.

*Low = Statement blinded and no reason to suggest blinding seriously compromised; or blinding inferred, operational process described and no reason to suggest blinding seriously compromised*

Criteria for the judgement of 'High risk' of bias.

Any one of the following:

- No blinding of outcome assessment, and the outcome measurement is likely to be influenced by lack of blinding;
- Blinding of outcome assessment, but likely that the blinding could have been broken, and the outcome measurement is likely to be influenced by lack of blinding.

*High = Statement that not blinded; or statements suggesting definitely not blinded*

Criteria for the judgement of 'Unclear risk' of bias.

Any one of the following:

- Insufficient information to permit judgement of 'Low risk' or 'High risk';
- The study did not address this outcome.

*Unclear = No statement; or blinding inferred but not directly stated*

**INCOMPLETE OUTCOME DATA**

Attrition bias due to amount, nature or handling of incomplete outcome data.

Criteria for a judgement of 'Low risk' of bias.

Any one of the following:

- No missing outcome data;
- Reasons for missing outcome data unlikely to be related to true outcome (for survival data, censoring unlikely to be introducing bias);
- Missing outcome data balanced in numbers across intervention groups, with similar reasons for missing data across groups;
- For dichotomous outcome data, the proportion of missing outcomes compared with observed event risk not enough

1  
2  
3  
4  
5  
6  
7  
8  
9  
10  
11  
12  
13  
14  
15  
16  
17  
18  
19  
20  
21  
22  
23  
24  
25  
26  
27  
28  
29  
30  
31  
32  
33  
34  
35  
36  
37  
38  
39  
40  
41  
42  
43  
44  
45  
46  
47  
48  
49  
50  
51  
52  
53  
54  
55  
56  
57  
58  
59  
60

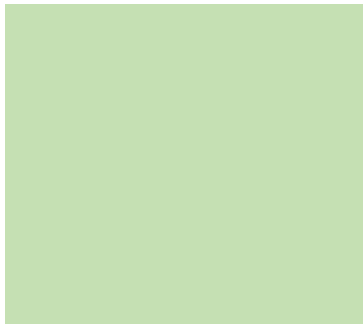

to have a clinically relevant impact on the intervention effect estimate;

- For continuous outcome data, plausible effect size (difference in means or standardized difference in means) among missing outcomes not enough to have a clinically relevant impact on observed effect size;
- Missing data have been imputed using appropriate methods.

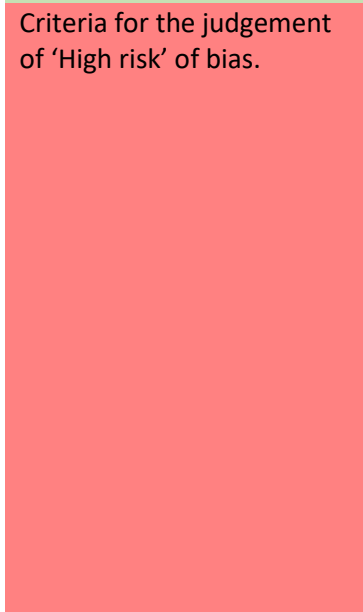

Criteria for the judgement of 'High risk' of bias.

Any one of the following:

- Reason for missing outcome data likely to be related to true outcome, with either imbalance in numbers or reasons for missing data across intervention groups;
- For dichotomous outcome data, the proportion of missing outcomes compared with observed event risk enough to induce clinically relevant bias in intervention effect estimate;
- For continuous outcome data, plausible effect size (difference in means or standardized difference in means) among missing outcomes enough to induce clinically relevant bias in observed effect size;
- 'As-treated' analysis done with substantial departure of the intervention received from that assigned at randomization;
- Potentially inappropriate application of simple imputation.

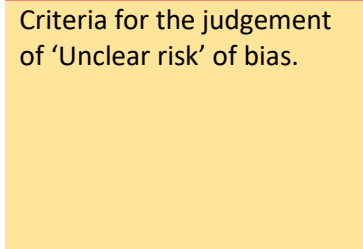

Criteria for the judgement of 'Unclear risk' of bias.

Any one of the following:

- Insufficient reporting of attrition/exclusions to permit judgement of 'Low risk' or 'High risk' (e.g., number randomized not stated, no reasons for missing data provided);
- The study did not address this outcome.

**SELECTIVE REPORTING**

Reporting bias due to selective outcome reporting.

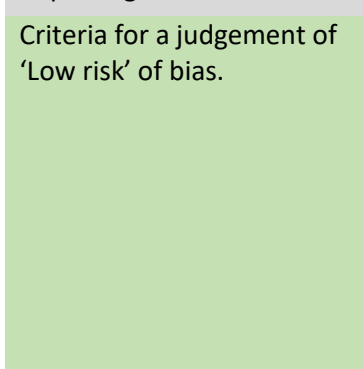

Criteria for a judgement of 'Low risk' of bias.

Any of the following:

- The study protocol is available and all of the study's pre-specified (primary and secondary) outcomes that are of interest in the review have been reported in the pre-specified way;
- The study protocol is not available, but it is clear that the published reports include all expected outcomes, including those that were pre-specified (convincing text of this nature may be uncommon).

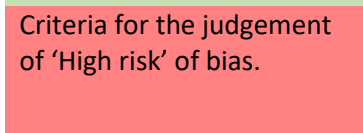

Criteria for the judgement of 'High risk' of bias.

Any one of the following:

- Not all of the study's pre-specified primary outcomes have been reported;



|                                                       |                                                                                                                                                                                                                                                                                                                                                                                                                                                                                                                                                                                                                                                                  |
|-------------------------------------------------------|------------------------------------------------------------------------------------------------------------------------------------------------------------------------------------------------------------------------------------------------------------------------------------------------------------------------------------------------------------------------------------------------------------------------------------------------------------------------------------------------------------------------------------------------------------------------------------------------------------------------------------------------------------------|
|                                                       | <ul style="list-style-type: none"> <li>• One or more primary outcomes is reported using measurements, analysis methods or subsets of the data (e.g., subscales) that were not pre-specified;</li> <li>• One or more reported primary outcomes were not pre-specified (unless clear justification for their reporting is provided, such as an unexpected adverse effect);</li> <li>• One or more outcomes of interest in the review are reported incompletely so that they cannot be entered in a meta-analysis;</li> <li>• The study report fails to include results for a key outcome that would be expected to have been reported for such a study.</li> </ul> |
| Criteria for the judgement of 'Unclear risk' of bias. | <p>Insufficient information to permit judgement of 'Low risk' or 'High risk'. It is likely that the majority of studies will fall into this category.</p> <p><i>Insufficient information to permit judgement of 'Low risk' or 'High risk' as study protocol is not available, and/or suspected study's primary and secondary outcomes were not pre-specified and/or one or more outcomes of interest in the review are reported incompletely so that they cannot be entered in a meta-analysis</i></p>                                                                                                                                                           |

### SAMPLE SIZE

|                                                       |                                                                                                   |
|-------------------------------------------------------|---------------------------------------------------------------------------------------------------|
| Criteria for a judgement of 'Low risk' of bias.       | <i>Sample size <math>\geq</math> 200 participants in trial arm of the primary TENS comparison</i> |
| Criteria for the judgement of 'High risk' of bias.    | <i>Sample size <math>&lt;</math>50 participants in trial arm of the primary TENS comparison</i>   |
| Criteria for the judgement of 'Unclear risk' of bias. | <i>Sample size = 50-199 participants in trial arm of the primary TENS comparison</i>              |

### SAMPLE SIZE CALCULATION

|                                                    |                                                                                                                                                                                                                                                                                                                                                   |
|----------------------------------------------------|---------------------------------------------------------------------------------------------------------------------------------------------------------------------------------------------------------------------------------------------------------------------------------------------------------------------------------------------------|
| Criteria for a judgement of 'Low risk' of bias.    | <p>Sample size calculation performed following the CONSORT guidelines. (Moher et al., 2012)</p> <p><i>Low Risk = Statement in report that sample size estimated and/or a calculation performed, and no reason suspect that estimation method and/or calculation was incorrect from information in report</i></p>                                  |
| Criteria for the judgement of 'High risk' of bias. | <p>No sample size calculation reported.</p> <p><i>High Risk = No statement in report that sample size estimated and/or a calculation performed; or stated in report that sample size estimated and/or a calculation performed, but information in report provided clear evidence that estimation method and/or calculation was incorrect.</i></p> |

|                                                       |                                                                                                                                                                                                                 |
|-------------------------------------------------------|-----------------------------------------------------------------------------------------------------------------------------------------------------------------------------------------------------------------|
| Criteria for the judgement of 'Unclear risk' of bias. | Sample size calculation performed, but lack of information provided.<br><br><i>Unclear Risk = Stated in report that sample size estimated and/or a calculation performed, but lack of information provided.</i> |
|-------------------------------------------------------|-----------------------------------------------------------------------------------------------------------------------------------------------------------------------------------------------------------------|

| <b>CROSSOVER EFFECT</b>                               |                                                                                                                                                              |
|-------------------------------------------------------|--------------------------------------------------------------------------------------------------------------------------------------------------------------|
| Reporting bias due to carryover in crossover studies  |                                                                                                                                                              |
| Criteria for a judgement of 'Low risk' of bias.       | Order of receiving intervention was randomized, presence of a wash-out period clearly stated, other measures clearly stated to control for crossover effect. |
| Criteria for the judgement of 'High risk' of bias.    | Order of receiving intervention not randomized, presence of a wash-out period not stated, nor measures taken to control for crossover effects.               |
| Criteria for the judgement of 'Unclear risk' of bias. | Insufficient information to permit judgement of low/high risk of bias.                                                                                       |

Figure A1 Risk of bias criteria.

Peer review only

## Measures and Analysis of treatment effect

### Evaluation of Pain Outcomes: Description of principles and operational procedures

Pain outcomes tend to have a U-shaped distribution with some patients experiencing substantial reductions in pain and others experiencing minimal or no improvement [12], so average data may be misleading because small average between-group effect sizes may represent a proportion of participants that responded well to the intervention [13]. Thus, we set responder rate as a primary outcome. The Outcome Measures in Rheumatology (OMERACT 12)[14] group states that the proportion of patients achieving one or more thresholds of improvement from baseline pain should be reported in addition to mean change. We followed the Initiative on Methods, Measurement, and Pain Assessment in Clinical Trials (IMMPACT) definitions when analysing response to treatment and consider reports of pain relief of 30% or greater compared to baseline as responders [15].

#### Primary Pain Outcomes

##### *Proportion of participant-reported pain relief of $\geq 30\%$ expressed as frequency (dichotomous) data*

Our primary outcome was responder rate. The proportion of participants reporting a reduction in pain intensity of 30% or greater (i.e., at least moderate pain relief) compared with baseline in each group was classed as responders [12,13]. We calculated risk ratio (RR) with 95% confidence intervals (CI). Comparisons between groups were finalised by calculating the number needed to treat to benefit (NNTB) as an absolute measure of treatment effect where possible [15].

##### *Participant-reported pain intensity expressed as mean (continuous) data*

We predicted that most RCTs in our review would present effect sizes as the average between intervention groups. We calculated standardised mean difference (SMD) with 95% CI because continuous data was collected on different scales (i.e., both VAS and NRS). We used a between-group difference of  $\geq 10$  mm on a 0 to 100 mm VAS for minimally important outcome for pain intensity in-line with IMMPACT criteria for clinically important change, as previously used in Cochrane reviews, where no important change  $< 15\%$ , minimally important change  $15\% > 30\%$ , moderately important change  $30\% > 50\%$  and substantially important change  $\geq 50\%$  [15]. We planned to interpret these findings with caution as it remains possible that estimates that fall close to this point may reflect a treatment that benefits an appreciable number of patients.

For standardised mean difference (SMD) we used 'Rules of thumb' based on Cohen's d [3,16] for interpreting effect sizes as follows:

- $< 0.4$  = small effect
- $0.4 < 0.7$  = moderate effect
- $\geq 0.7$  = large effect

We considered a SMD of 0.5 as a rule of thumb for an important difference [3], and were mindful that interpretations of this nature can be problematic due a variety of factors including settings and context in which pain was evaluated.

#### Secondary Pain Outcomes

We identified the proportion of participants reporting a reduction in pain intensity of 50% or greater (i.e., at least substantial pain relief) as a secondary outcome. In addition, we planned to analyse the frequency of adverse events using the same procedures described for dichotomous and continuous data for primary outcomes.

### Evaluation of Adverse Events: Description of principles and operational procedures

For adverse events, we took an exploratory approach 'through opportunistic capture of any adverse effects that happen to be reported' rather than a bespoke search of wider sources [17]. We used the Cochrane Collaboration's definition of adverse event as "... an unfavourable or harmful outcome that

1  
2  
3 *occurs during, or after, the use of a drug or other intervention, but is not necessarily caused by it, and*  
4 *an adverse effect (or harm) as an adverse event for which the causal relation between the*  
5 *intervention and the event is at least a reasonable possibility” [17]. Serious adverse events were*  
6 defined as untoward medical occurrence or effect resulting in death, threat to life, hospitalisation,  
7 significant disability or incapacity, congenital anomaly, or birth defect. We extracted data for  
8 adverse effects of any type or severity as descriptions from participants and number of withdrawals  
9 and/or stopping of treatment.  
10

11  
12 We conducted a descriptive analysis and calculated relative risk by extracting and pooling data for  
13 meta-analysis. We only extracted data as ‘zero’ when the RCT report included numerical data for the  
14 presence of at least one adverse event in one of the trial arms and clearly stated that no adverse  
15 events had occurred in the other trial arm(s).  
16

### 17 **Unit of analysis issues**

18 We included crossover designs and planned to only enter data from the first period into the meta-  
19 analysis unless trial authors argued convincingly that there was sufficient washout between  
20 interventions to eliminate contamination. If this was not the case, we planned to note this and  
21 would not include the data.  
22  
23

24 There was sufficient washout between interventions to eliminate contamination for all cross trials.  
25 For simplicity we analysed crossover data as if parallel group in line with analytical processes  
26 undertaken by the trial authors. Analysing crossover data as if parallel group, normally requires  
27 generic inverse variance to correct for correlation between groups using the same participants  
28 (paired data), but we argue that has negligible impact on outcome because generic inverse variance  
29 increases confidence intervals, and this will be negated by the influence of the overwhelming  
30 number of data points from parallel group studies.  
31  
32

### 33 **Dealing with missing data**

34 An intention-to-treat (ITT) analysis was used when the ITT population were randomised, received  
35 at least one dose of TENS, and provided at least one post-baseline outcome measurement. Missing  
36 participants were assigned zero improvement wherever possible.  
37  
38

### 39 **Data synthesis**

40 We used Review Manager 5.3 to pool data and undertake meta-analyses. We grouped data  
41 according to outcome and measurement time points prioritising pain at rest at the last during TENS  
42 (whilst TENS was switched on) or the first measurement time point immediately after TENS had been  
43 switched off. When TENS was applied on more than one occasion as a course of treatment, we  
44 selected a measurement time point that was clinically rational, such as the last treatment session  
45 and / or as close to an event that precipitated pain (e.g., trauma, operative procedure).  
46  
47  
48  
49  
50  
51  
52  
53  
54  
55  
56  
57  
58  
59  
60

### Assessment of heterogeneity

We examined heterogeneity using visual inspection of forest plots, the  $I^2$  statistic and the  $\text{Chi}^2$  test [18]. We used the Cochrane Collaboration's rough guide to interpretation and graded heterogeneity as:

- Not important ( $I^2 = 0\%$  to  $40\%$ )
- Moderate ( $I^2 = 30\%$  to  $60\%$ )
- Substantial ( $I^2 = 50\%$  to  $90\%$ )
- Considerable ( $I^2 = 75\%$  to  $100\%$ ).

Heterogeneity issues likely at play were:

- Methodological heterogeneity, associated with trial design
- Clinical heterogeneity, associated with pain
- Intervention (treatment) heterogeneity, associated with TENS and comparators

We conducted subgroup and sensitivity analyses to explore heterogeneity further.

#### Subgroup Analyses: Descriptions of the principles and operational procedures

We pre-specified the following subgroup analyses to investigate sources of heterogeneity and/or estimate treatment effects patient subgroups:

- Type of pain: acute pain, chronic pain, and specific painful conditions
- TENS technique: Optimal intensity described as at least 'strong'; Sub-optimal intensity described as 'barely perceptible', 'faint', or 'mild'; Conventional TENS (high frequency TENS), acupuncture-like TENS (Low frequency TENS)
- TENS dosage: Single TENS treatment, Multiple TENS treatments, use as often as needed
- Measurement time point: during TENS (whilst switched on), after TENS (whilst switched off)
- Contamination from concurrent treatment: TENS administered as a sole treatment, TENS administered in combination with medication, TENS administered in combination with non-pharmacological treatments

It became apparent during screening and data extraction that some pre-specified subgroup analyses would not be possible and/or meaningless.

We refined our pre-specified subgroup analyses as follows:

- Methodological heterogeneity, associated with trial design
  - We conducted subgroup and sensitivity analyses to explore the impact of the following on effect size estimates and statistical heterogeneity:
    - high overall risk of bias (i.e., score of  $<6$  out of 8)
    - trial arm sample sizes of  $<100$ ,  $<50$  and  $<30$  participants
    - estimation of sample size *a priori*
    - type of placebo
    - TENS administered on its own or with other treatment
- Clinical heterogeneity, associated with pain
  - We conducted subgroup and sensitivity analyses to explore the impact of the following on effect size estimates and statistical heterogeneity
    - duration of pain (acute vs chronic),
    - pain conditions (diagnosis) according to trial author
    - broad ICD-11 categories
    - mechanistic descriptors (nociceptive or neuropathic)
    - anatomical structures involved

- Intervention (treatment) heterogeneity, associated with TENS and comparators
  - Our eligibility criteria biased the inclusion of RCTs that had optimised TENS intervention in terms of generating a strong non-painful TENS sensation at (or close to) the site of pain, irrespective of variations in electrical characteristics of currents produced by a 'standard TENS device' making a subgroup analysis of optimal versus suboptimal intensity or site of stimulation impossible.
  - There was insufficient data to undertake subgroup analyses for high frequency versus low frequency TENS for any comparison
  - Unclear, inconsistent, and inaccurate terminology and the omission of important detail in trial reports rendered subgroup analyses of conventional TENS versus acupuncture-like TENS, and contamination from concurrent treatments meaningless. Such issues would affect the fidelity of subgroup analyses of outcomes at different measurement time points and at following up and therefore we have postponed this analysis until the future.

### **Subgroup analyses: Interpreting the findings**

We followed guidance from [19] when interpreting subgroup analyses using the following criteria

- Criteria 1: report whether a statistically significant subgroup difference (interaction) was detected
- Criteria 2: consider the covariate distribution (i.e., the number of trials and participants contributing to each subgroup)
- Criteria 3: consider the plausibility of the interaction or lack of interaction
- Criteria 4: consider the importance of the interaction or lack of interaction
- Criteria 5: consider the possibility of confounding

We considered a p-value of less than 0.1 from the test for subgroup differences to indicate a statistically significant difference between the pooled effect estimates for each subgroup (i.e., a subgroup effect (interaction). This indicates that the characteristic under consideration (i.e., the covariate) modifies treatment effect. We also noted whether the direction of each subgroup effect differed and favoured different treatments (i.e., qualitative) or whether the direction of each subgroup effect was the same for the treatment but of different sizes (i.e., quantitative). We also considered the extent to which individual trials differed in treatment effects within each subgroup (i.e., heterogeneity).

If heterogeneity within a subgroup was substantial/considerable, we conducted a further exploration of heterogeneity prior to drawing a conclusion about treatment effect within the subgroup. This included visual inspection of forest plots to evaluate the extent of heterogeneity within the subgroups and across all trials to determine whether the findings of the analyses are trustworthy, whilst acknowledging uncertainty from the inconsistency between individual trial findings.

### **Reporting (Publication) Biases: Descriptions of operational procedures**

Publication bias was assessed using a method designed to detect the amount of unpublished data with a null effect required to make any result clinically irrelevant (usually taken to mean a numbers needed to treat for benefit (NNTB) of 10 [20]). The influence of small study samples was assessed using the risk of bias criterion 'Sample size' according to numbers of participants analysed in the TENS trial arm.

We visually inspected funnel plots to explore the likelihood of reporting bias if there were at least 10 RCTs in a meta-analysis and if RCTs differed in sample size. Small study effects were analysed using Egger's regression test and the Trim and Fill method was used to analyse potential publication bias



for RCTs using continuous outcomes [3]. For Egger's regression test, the statistical significance was set at  $\leq 0.1$ .

For peer review only

1  
2  
3  
4  
5  
6  
7  
8  
9  
10  
11  
12  
13  
14  
15  
16  
17  
18  
19  
20  
21  
22  
23  
24  
25  
26  
27  
28  
29  
30  
31  
32  
33  
34  
35  
36  
37  
38  
39  
40  
41  
42  
43  
44  
45  
46  
47  
48  
49  
50  
51  
52  
53  
54  
55  
56  
57  
58  
59  
60

### Quality of the evidence

We considered single RCTs too imprecise, unless the trial arm sample size was greater than 200 participants for continuous data and greater than 150 events for dichotomous data. We considered pooled data to be imprecise if the sample size for a treatment arm was below than 500 participants.

We planned to present pooled effects for outcomes with GRADE judgements in 'Summary of findings' tables. Two review authors (MIJ and PGW) independently rated the quality of outcomes using the Grades of Recommendation, Assessment, Development and Evaluation (GRADE) system (GRADEpro GDT 2015, Supplementary material – S9). We decreased GRADE ratings as follows:

- Limitations to study quality - Serious (- 1) or very serious (- 2)
- Important inconsistency about directness - Some (- 1) or major (- 2)
- Imprecise or sparse data (- 1)
- High probability of reporting bias (- 1)

## SECTION 2 – SUPPLEMENTARY DETAILS OF FINDINGS OF THE ANALYSES

### Results of the search

The initial search was conducted during July 2019 and identified 6188 potentially relevant records. There were 16 additional records identified through other sources. After removal of duplicates, we screened the titles and abstracts of 4256 records and obtained and read the full texts of 548 records. We excluded 168 records after screening the full text report, with 17 records awaiting classification. We included 348 records of 346 RCTs. Processing of these 346 RCTs (i.e., assessing risk of bias, extracting study characteristics and data, and analysis took 9 months.

We conducted an updated search on 17 May 2020 and identified an additional 1491 potentially relevant records. We removed duplicates and screened titles and abstracts and read the full texts of 75 records. We excluded 37 records after screening the full text report, and included additional 36 RCTs, with 2 records awaiting classification.

In total, our final analysis included 381 RCTs, with 19 RCTs awaiting classification.

### ***Management of multiple records (secondary reports) of one RCT***

We categorised multiple records of one RCT as follows.

- An RCT with 1-year follow-up data of 70 patients by [21] as the primary report and 3-month data of the first 23 patients [22] and 3-month data of 36 patients (presumably including the first 23 patients) [23] as secondary reports
- An RCT of TENS in addition to usual primary care management for the treatment of tennis elbow by [24] as the primary report and an economic evaluation by [25] as a secondary report
- An RCT evaluating TENS versus manual therapy for neck pain by [26] reported as the primary report and a Spanish language version by [27] as a secondary report
- The short-term results an RCT evaluating TENS for various chronic pains by [28] as the primary report and an analysis to predict outcome of TENS from the RCT [29], the long-term results of the RCT [30] and the findings of a pilot study investigating different mechanisms for short-term effects of TENS [31] as secondary reports
- An RCT evaluating TENS for knee osteoarthritis by [32] as the primary report and outcomes associated with knee kinematics and kinetics [33] as a secondary report

### ***Management of multiple samples within one report***

The following were described and analysed as distinct sample populations within one report of one RCT. We analysed data from these samples separately.

- Chia et al. [34] conducted separate analyses for a sample of participants categorised as nulliparous and multiparous (n = 101) and a sample categorised as nulliparous only (n = 20)
- Kayman-Kose et al. [35] conducted separate analyses for a sample of participants categorised as having a Caesarean section (n = 100) and a sample of participants categorised as having a Vaginal delivery (n = 100)

Finally, Lin et al. [36] reported the findings of an RCT of TENS for shoulder pain and Lin et al. [37] reported a similar RCT for chronic shoulder tendonitis. Inspection of reports revealed minor differences in protocols and data, so we categorised these as distinct RCTs with different sample populations.

Thus, we identified 383 distinct samples from 381 RCTs to be included in the review.

### ***Management of errors detected in previous meta-analyses***

We conducted a search for systematic reviews on 01 July 2019 and identified 145 systematic reviews that had included RCTs to evaluate the effect of TENS on pain-related outcomes. Our descriptive analysis of systematic reviews found that:

- There were 32/145 Cochrane reviews and 113/145 non-Cochrane reviews
- The mean number of RCTs in a systematic review was 5.6 (maximum: 35; minimum: 1)
- The statements of conclusion in most systematic reviews tended toward inconclusive (70/145) or efficacious (51/145)

The findings of the preliminary descriptive analysis of systematic reviews were disseminated at the European Federation of Chapters of IASP Conference XI held in Valencia, Spain in September 2019.

We cross-checked data presented in meta-analyses of previously published systematic reviews with data extracted from RCTs included in our meta-TENS review. We found very few inconsistencies with data extracted and used in our meta-analysis. We corrected the following errors detected in previous meta-analyses

- double counts of samples from individual RCTs in pooled data (e.g., [38-41])
- the extraction of the area under the curve for pain intensity instead of VAS 100 mm scale (e.g., (i.e., [42] for the RCT by [43])

### **Description of reasons for excluding studies**

Primary reasons for excluding studies are provided in the online Table of Excluded Studies. Often studies were excluded for multiple violations of our inclusion criteria. At least 39 studies were excluded for not being an RCT.

### **Violations of criteria for 'standard TENS'**

The most common reason for exclusion were for violations of our *a priori* criteria for TENS (i.e., electrical characteristics, electrode placement sites, and type of devices; at least 90 studies). The following electrical stimulation techniques were excluded; Transcutaneous electric acupoint stimulation; Transcutaneous spinal electroanalgesia; Acupuncture-like stimulation delivered using a Codetron device; Supraorbital transcutaneous stimulation; Non-invasive interactive neurostimulation using an InterX5000 device); H-wave therapy; Neuromuscular electrical stimulation; Interferential current therapy; 5KHz sine wave currents; Microcurrent electrical stimulation; High voltage pulsed direct current; Frequency rhythmic electrical modulation; and Auto-targeted neurostimulation. Some of these techniques have been included in previous systematic reviews on TENS.

Some original trial authors mistakenly described a technique as 'TENS', despite on close inspection the electrical characteristics of currents did not match those associated with TENS. For example, reports by Itoh et al. state in the title of their report that they evaluated the effect of TENS for knee osteoarthritis [44] and chronic non-specific low back pain [45]. Inspection of the trial report reveals the characteristics of currents akin to interferential therapy "... a single-channel portable TENS unit (model HVF3000, OMRON Healthcare Co Ltd, Japan), which sends between two electrodes a premixed amplitude-modulated frequency of 122 Hz (beat frequency) generated by two medium frequency sinusoidal waves of 4.0 and 4.122 kHz [feed frequency]" [45] p23. RCTs by Itoh et al., have been previously included in a Cochrane review on osteoarthritis [46] and a non-Cochrane meta-analysis on low back pain [47].

### **Violations of criteria for appropriate body site for TENS**

At least 20 studies were excluded for administering TENS to acupuncture points that we considered to be remote to the site of pain. Many of these studies evaluated transcutaneous electric acupoint stimulation (TEAS, TAES) in which stimulation was delivered to remote acupuncture points using pulsed currents described as 'dense-disperse' using frequencies alternating between 2pps and

100pps. There was a subset of transcutaneous electric acupoint stimulation studies that administered stimulation as a one-off treatment before surgery (i.e., pre-emptive) for post-surgical pain. Some reports implied that transcutaneous electric acupoint stimulation may have been administered to regional acupuncture points but often details were unclear. For consistency, we decided to exclude all studies described as evaluating transcutaneous electric acupoint stimulation.

Four studies were excluded because they administered TENS to an internal body site, i.e., intravaginal [48-50] or intra-oral [51].

### **Violations of criteria for adult participants**

Four studies were excluded because they included at least one child under the age of 16 years [52-55]. We included RCTs by [56], [57] and [58] despite having a sample population with at least one participant no younger than 17 years of age, because the mean age of the sample suggested over 90% of participants were over 18 years of age. We appreciate that including people under 18 can raise issues such as participants between 16-18 years can be included in paediatric studies which may have been missed by our search strategy. It was not possible to isolate the effects of TENS from other treatments given simultaneously or there was no suitable comparison group to assess the contribution of TENS to outcome in at least 17 studies.

### **Studies Awaiting Classification**

There were 19 studies awaiting classification (Online Table of Studies Awaiting Classification) because we were unable to obtain full texts (n = 7 records) and we were unable to translate non-English language full text records (n = 12 records).

### **Description of Included RCTs**

#### **Characteristics of included trials**

We included 381 RCTs at entry. A summary of the characteristics of included RCTs is provided in the Online Table of Included Studies and a summary of the conclusion for each RCT is provided the Online Table of RCT Authors' Conclusion.

#### *Study Design*

We identified 383 distinct population samples from 381 RCTs. There were 24532 participants at entry with the mean  $\pm$  SD study sample size being  $64.05 \pm 58.29$  participants (n=383 samples, maximum = 607 [59], minimum = 5 [60]).

There were 10615 participants enrolled into the trial arm that we categorised as the primary TENS group, with the mean  $\pm$  SD primary TENS trial arm sample size being  $27.71 \pm 21.89$  participants (maximum = 144 [59]; minimum = 5 participants [60-64]).

We categorised 334 RCTs as a parallel-group design, and 47 as crossover design. We categorised 270 RCTs as predominantly pragmatic (efficacious) in focus and 111 RCTs as predominantly explanatory (mechanistic) in focus.

There were 129 reports that stated that an estimation of sample size had been made *a priori*.

RCTs were conducted in 38 countries with the most frequent sample populations being from Turkey (56 RCTs), with high proportions of RCTs conducted in the USA (51 RCTs), Brazil (38 RCTs), UK (37 RCTs), and Sweden (27 RCTs).

#### *Types of pain*

We categorised 162/383 samples of participants with acute pain, 176/383 samples of participants with chronic pain, and 10/383 samples as including participants with acute and chronic pain.

The category of pain was not reported for 35/383 samples of participants. We categorised samples of participants according to pain condition as follows:

- 95/383 as post-operative pain
- 37/383 as back pain (predominantly chronic low back pain)
- 32/383 as osteoarthritis (predominantly of the knee)
- 26/383 as labour pain
- 23/383 samples of participants with procedural pain
- 22/383 as non-specific musculoskeletal pain of the neck and/or shoulder
- 16/383 as dysmenorrhea
- 15/383 samples of participants with temporomandibular joint pain
- 12/383 samples of participants with myofascial pain
- 11/383 as various pain conditions
- 9/383 samples of participants with fibromyalgia
- 7/383 samples of participants with post stroke pain
- 7/383 samples of participants with rheumatoid arthritis

The remaining samples were from a variety of conditions including peripheral diabetic neuropathy (6 samples), spinal cord injury (5 samples), and neuralgias

There were 231/381 RCTs that had 2 comparison groups, 111/381 RCTs had 3 comparison groups, 29/381 RCTs had 4 comparison groups, 6/381 RCTs had 5 comparison groups, 3/381 RCTs had 6 comparison groups and 1/381 RCT had 12 comparison groups.

#### *Contamination from Concurrent treatment*

Many reports described delivering TENS as if it was a sole treatment, although reports often revealed that participants could access other form of treatments including drug medication and or exercise. We categorised at least 216/383 samples as having access to other treatments whilst receiving TENS that may 'contaminate' estimates of TENS effects, although attempts were often made to standardise such access between comparison groups. Analgesic medication or exercise was available informally as part of ongoing standard of care (SoC) or formally as part of a combination treatment. Rescue medication was standardised and/or monitored and/or measured in some but not all RCTs. Generally, there was inadequate monitoring and or reporting of analgesic consumption and/or use other treatments associated with the primary TENS intervention.

#### **Characteristics of TENS interventions**

##### *Site of TENS in relation to painful site*

TENS was delivered at the site of pain for 376/383 samples, of which TENS was delivered to regional acupuncture points at the site of pain in 7/383 of these samples [65-71].

TENS was not delivered to the site of pain in 3/383 samples. This was due to skin sensitivity and integrity at the site of pain painful diabetic neuropathy so TENS was delivered to the lower back (dermatomal) [60,72]; and to the absence of a limb so TENS was delivered to the contralateral leg for phantom limb pain [73].

There were 2 reports where the statement of the location of TENS was unclear [74,75]. There were 2/381 reports that did not state the location of TENS, although supplementary information within these reports (e.g., descriptions of TENS in Introduction and/or Discussion sections) suggested that the location of TENS was appropriate and did not violate our inclusion criteria [76,77].



### *Intensity of TENS*

TENS was delivered at intensities that were strong and above sensory detection threshold to 342/383 samples. There were 36/381 reports that did not state the intensity of TENS and 7/381 descriptions that were unclear, supplementary information within these reports (e.g., current amplitude (mA), or descriptions of TENS in Introduction and/or Discussion sections) suggested that the intensity of TENS was appropriate and did not violate our inclusion criteria. It should be noted that our eligibility criteria biased our sample of RCTs towards those delivering TENS above sensory detection threshold.

### *Electrical Characteristics of TENS – Pulse Frequency*

The majority of RCT reports described the electrical characteristics of TENS. At face value, reporting appeared to be adequate yet extracting information proved challenging and the resulting categorisation of characteristics (variables) imprecise.

We categorised 363/383 samples as receiving TENS using electrical characteristics associated with standard TENS (i.e., pulsed electrical currents, see Methods). There were 9/383 reports that did not report the electrical characteristics of TENS and 11/383 reports where reporting was unclear, although supplementary information within these reports (e.g., device model) suggested that the electrical characteristics of TENS used did not violate our inclusion criteria.

There were 353/381 reports that included a numerical value for pulse frequency, and we were able to categorise 276/383 of the primary TENS samples as receiving HF TENS (>10 pps). It was less common for reports to include a statement of the pattern (mode) of pulse delivery. The nature of the design of TENS devices means that we can speculate that a continuous pattern of pulse delivery was used to deliver high frequency currents in most of these cases.

We categorised 35/383 samples as receiving low frequency TENS. Often reports did not distinguish between pulses per second and bursts per second when describing low frequency stimulation so it was not possible to ascertain whether low frequency TENS was administered using a continuous pattern of pulses delivered at a low frequency or as a burst pattern of pulses delivering low frequency bursts (trains) of high frequency pulses.

We categorised 17/383 samples as receiving TENS delivered by alternating (or switching) the pattern of stimulation between continuous to burst, as is often recommended for management of labour pain.

We categorised 9/383 samples as receiving alternating frequencies of TENS that used devices that were pre-programmed to intermittently switch between high and low and high frequency pulse delivery; 10/383 samples as receiving modulating frequency TENS; 2/383 samples as receiving random frequency TENS; and 6/383 samples as receiving various frequencies of TENS.

There were 28/381 reports that did not state the numerical pulse frequency of TENS used in the RCT. There were 109/381 reports that stated TENS was delivered at 100Hz; 43/381 reports that stated TENS was delivered at 80Hz; 8/381 reports that stated TENS was delivered at 4Hz; and 3/381 reports that stated TENS was delivered at 2Hz. The remaining reports stated more than one numerical value to describe the frequency of TENS (e.g., TENS was administered between upper and lower frequency boundaries). Participants in some RCTs were instructed to adjust the pulse frequency of TENS as needed.

1  
2  
3 Often, reports were unclear as to whether frequencies were pre-set and immovable or advisory  
4 starting frequencies on which to adjust according to need. Thus, characterisation of the numerical  
5 description of the frequency of TENS was imprecise.  
6

7  
8 There was inconsistency in the use of terms used to describe the type of TENS techniques. Terms  
9 used included conventional TENS, AL-TENS, brief intense TENS, high frequency TENS, low frequency  
10 TENS, acu-TENS.  
11

### 12 *Adequacy of TENS intervention*

13 We categorised 336/383 of the primary TENS intervention as meeting all 3 criteria for adequacy:  
14 standard electrical characteristics, administered at an appropriate site relative to pain, and at  
15 intensities above sensory detection. There were 47/383 samples where there was uncertainty in at  
16 least one of these criteria, although overall, we judged the electrical characteristics of TENS used did  
17 not violate our inclusion criteria.  
18

19  
20 TENS regimens varied from single and multiple treatments of less than one minute duration for post-  
21 partum uterine contractions [78], dysmenorrhea [79], post-operative surgical abortion [80] or  
22 gynaecologic laparoscopic surgery [81] and brief procedural pains such as carboxytherapy [82] to  
23 multiple treatments of unspecified duration (e.g., self-administered home treatment for chronic pain  
24 as prn).  
25

26  
27 The longest duration of a course of TENS treatment was in a randomised double-blind evaluation of  
28 different types of electrical characteristics of TENS for chronic pain in which participants self-  
29 administered TENS until they no longer required TENS or up to a maximum of 2 years [83]. The trial  
30 authors concluded that there was no difference in efficacy between pulsed (burst at a low  
31 frequency) or continuous (high frequency) TENS.  
32

### 33 *Characteristics of Outcome Measures*

34 There were 352 or the 381 RCTs that recorded measurements related to our primary outcome, that  
35 used a VAS or some other pain continuous or ordinal scale. There were 29/381 RCTs that did not  
36 collect data related to our primary outcome measures, but all collected secondary outcome data  
37 related to pain, and were therefore included for review.  
38

39  
40 The most common secondary outcome measurements were analgesic consumption (127 RCTs),  
41 range of motion (52 RCTs), McGill Pain Questionnaire scores (both full and short-form versions, 26  
42 RCTs), tenderness via pressure algometry (23 RCTs), WOMAC scores (14 RCTs), Quality of Life (12  
43 RCTs) Roland Morris Disability Questionnaire scores (8 RCTs).  
44  
45  
46  
47  
48  
49  
50  
51  
52  
53  
54  
55  
56  
57  
58  
59  
60

### Description of Risk of Bias Assessment

Our assessment of the risk of bias for individual RCTs is available from [m.johnson@leedsbeckett.ac.uk](mailto:m.johnson@leedsbeckett.ac.uk) on request.

We summarised our assessment of the risk of bias for the included studies as percentages across all included studies.

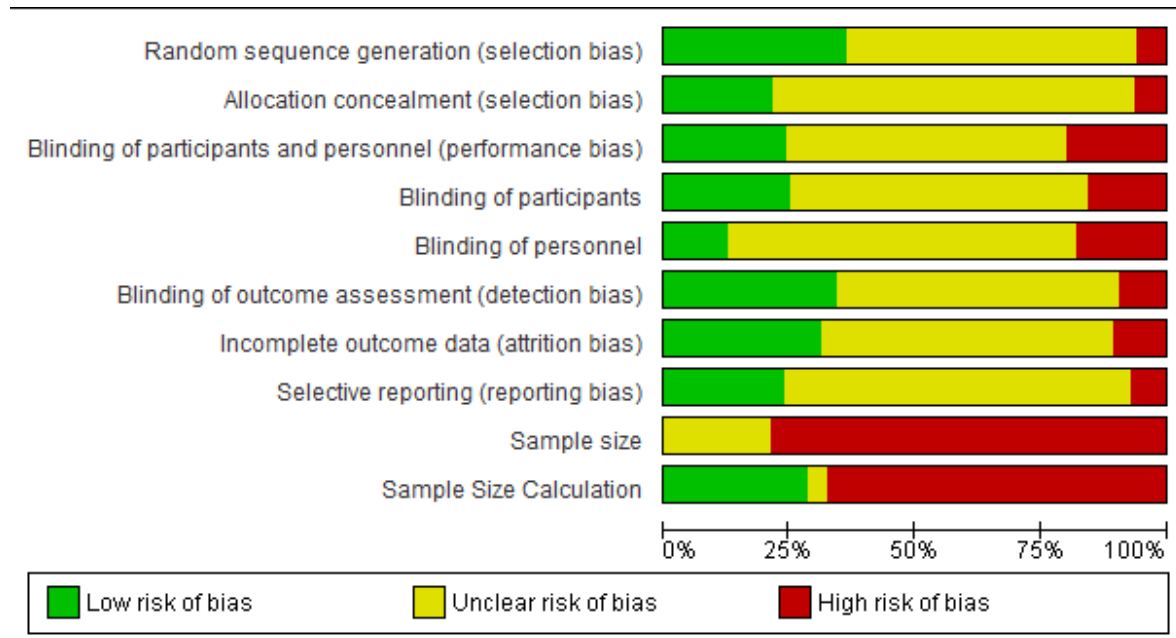

Figure A2 Risk of bias graph: review authors' judgements about each risk of bias item presented as percentages across all included studies.

### Overall Risk of Bias

Methodological details were superficial and unclear in many reports resulting in unclear RoB assessments. No studies were judged to have a low risk of bias across all 9 RoB items. There were 3/381 RCTs judged to have a low risk of bias across 8 of the 9 items, with unclear or high risk due to low sample sizes [84-86]. There were 9/381 RCTs with 7 or more items judged as low RoB [84-91] and 26/381 RCTs with 6 or more items as low RoB.

We categorised many RCTs as having an unclear risk of bias because study reports lacked omitted or lacked operational details associated with study methodology.

We categorised 341/381 RCTs as having a high risk of bias because of inadequate numbers of participants in the primary TENS trial arm sample (i.e., <50 participants, with no RCTs meeting our criteria for low risk of bias ( $\geq 200$  participants in the TENS arm)). There were 13/381 RCTs that used  $\geq 100$  participants in the primary TENS trial arm. The largest TENS trial arm size was 144 participants in a RCT with a total sample of 607 women randomised to receive acupuncture, TENS, or traditional analgesics to manage labour pain [92]. It was found that the use of pharmacological and invasive methods was lower in the acupuncture group compared with TENS ( $P = 0.031$ ) or traditional analgesics ( $P < 0.001$ ), although pain scores were comparable across groups.

### Randomisation and Allocation (selection bias)

We judged that 136/381 RCTs adequately described the method of random sequence generation and that 82/381 RCTs adequately described the method of allocation concealment.

### Blinding (performance bias and detection bias)

1  
2  
3 There were 94/381 reports that described a method of blinding of participants that was of low risk  
4 of performance bias. There were 48/381 reports that described a method of blinding of personnel  
5 that was of low risk of performance bias. There were 130/381 reports that described a method of  
6 blinding of assessors that was of low risk of detection bias.  
7

8  
9 Only a few studies attempted to assess seepage of blinding and/or whether participants and/or  
10 assessors considered interventions to be functioning correctly (active) or therapeutically  
11 plausible/credibility including [85,89,93,94]. Of the studies judged to be of low risk of performance  
12 bias [84,85,89] were noteworthy for detailed reporting of well- considered design attributes including  
13 the design and delivery of an authentic placebo control and an evaluation of the success or  
14 otherwise of blinding of the outcome assessor.  
15

#### 16 ***Incomplete outcome data (attrition bias)***

17 We awarded low risk of bias to studies with reports that reported that all participants completed the  
18 study with no missing outcome data or missing outcome data was balanced across the groups with  
19 similar reasons for loss. There were 118/381 RCTs judged to be of low risk of attrition bias.  
20

#### 21 ***Selective reporting (reporting bias)***

22 There were 90/381 RCTs judged to be of low risk of reporting bias.  
23  
24

#### 25 ***Sample size***

26 There were 13/381 RCTs with at least 100 participants in the TENS treatment arm and only 2 of  
27 these RCTs had extractable data [95](labour pain) [96](fibromyalgia). There were 341/381 RCTs with  
28 fewer than 50 participants in the TENS treatment arm.  
29

#### 30 ***Sample size estimation***

31 There were 129/381 reports that stated that a calculation had been undertaken to estimate sample  
32 size, although often the actual calculation was not provided. Often sample size estimates were  
33 stated for total number of participants rather than numbers needed in each trial arm and did not  
34 meet our criteria for low risk of bias.  
35  
36  
37  
38  
39  
40  
41  
42  
43  
44  
45  
46  
47  
48  
49  
50  
51  
52  
53  
54  
55  
56  
57  
58  
59  
60

### TENS versus placebo: Analysis of effects

There were 202/381 RCTs (203 samples) that compared TENS with a placebo intervention. There were 196 RCTs that delivered placebo TENS in one of the following ways:

- Using a modified TENS device that did not deliver currents (i.e., 0 mA, dead battery, modified circuitry, 155 interventions)
- Using a modified TENS device that delivered currents above that sensory detection threshold for a brief period (< 1 minute) before the amplitude declined to 0 mA (17 interventions)
- Using a modified TENS device that delivered currents above that sensory detection threshold using an interpulse interval of such long duration that it was considered by the authors not to have any physiological action (4 interventions)
- Delivering TENS at amplitudes below sensory detection threshold (12 interventions)
- Delivering TENS above that sensory detection threshold at sites considered to be unrelated to the pain (4 interventions)
- Four reports that did not state the nature of a placebo TENS intervention.

There were 6 RCTs that administered placebo pills and 1 RCT used a non-functioning ultrasound device.

#### Outcome: Pain intensity - expressed as mean (continuous) data

We extracted data at the last during TENS or the first post-TENS intervention measurement point after a course of TENS treatment (or a single treatment if only one TENS treatment was given) from 91 RCTs (92 samples, 4841 participants). Three of these RCTs were crossover studies deemed to have sufficient washout between interventions to eliminate contamination [89,97,98]. There was a significant overall effect in favour of TENS (SMD -0.96; 95% CI -1.14, -0.78) and substantial heterogeneity  $I^2 = 88\%$ . (Figure A3).

Visual inspection of the forest plot found reasonable consistency of treatment effects and overlap of confidence intervals with effect estimates and confidence intervals on the side favouring TENS in 50/92 samples. One of these RCTs seems to be an outlier [99] and a sensitivity analysis did not alter the overall effect. We suspected transcriptional errors whereby data had been attributed to the incorrect intervention group in two RCT reports [35,100]. In both instances mean  $\pm$  SD data was incorrectly attributed to the placebo group rather than the TENS group in the table of results because all aspects of the report discussed RCT outcome in favour of TENS rather than placebo. We attempted to contact RCT authors for clarification without reply. Cross checking data extracted in a systematic review arising from the same country as Luchesa et al. [100] and published within 3 years of the original report confirmed the transcription error [101] and correct data was entered into our meta-analysis. However, we were unable to confirm the transcription error for [35]. This potential error affected data related to the 'vaginal delivery group' but not a separate sample within the same study (the 'caesarean section group'). Therefore, we entered the data presented in the original report (Table 2 p3) into our meta-analysis. Sensitivity analyses by removing this 'vaginal delivery group' sample from subsequent analyses did not affect tests of overall effect nor tests for subgroup differences.

#### Forest Plot

MetaTENS\_Appendix\_BMJO\_05-10-2021 – Supplementary File 1

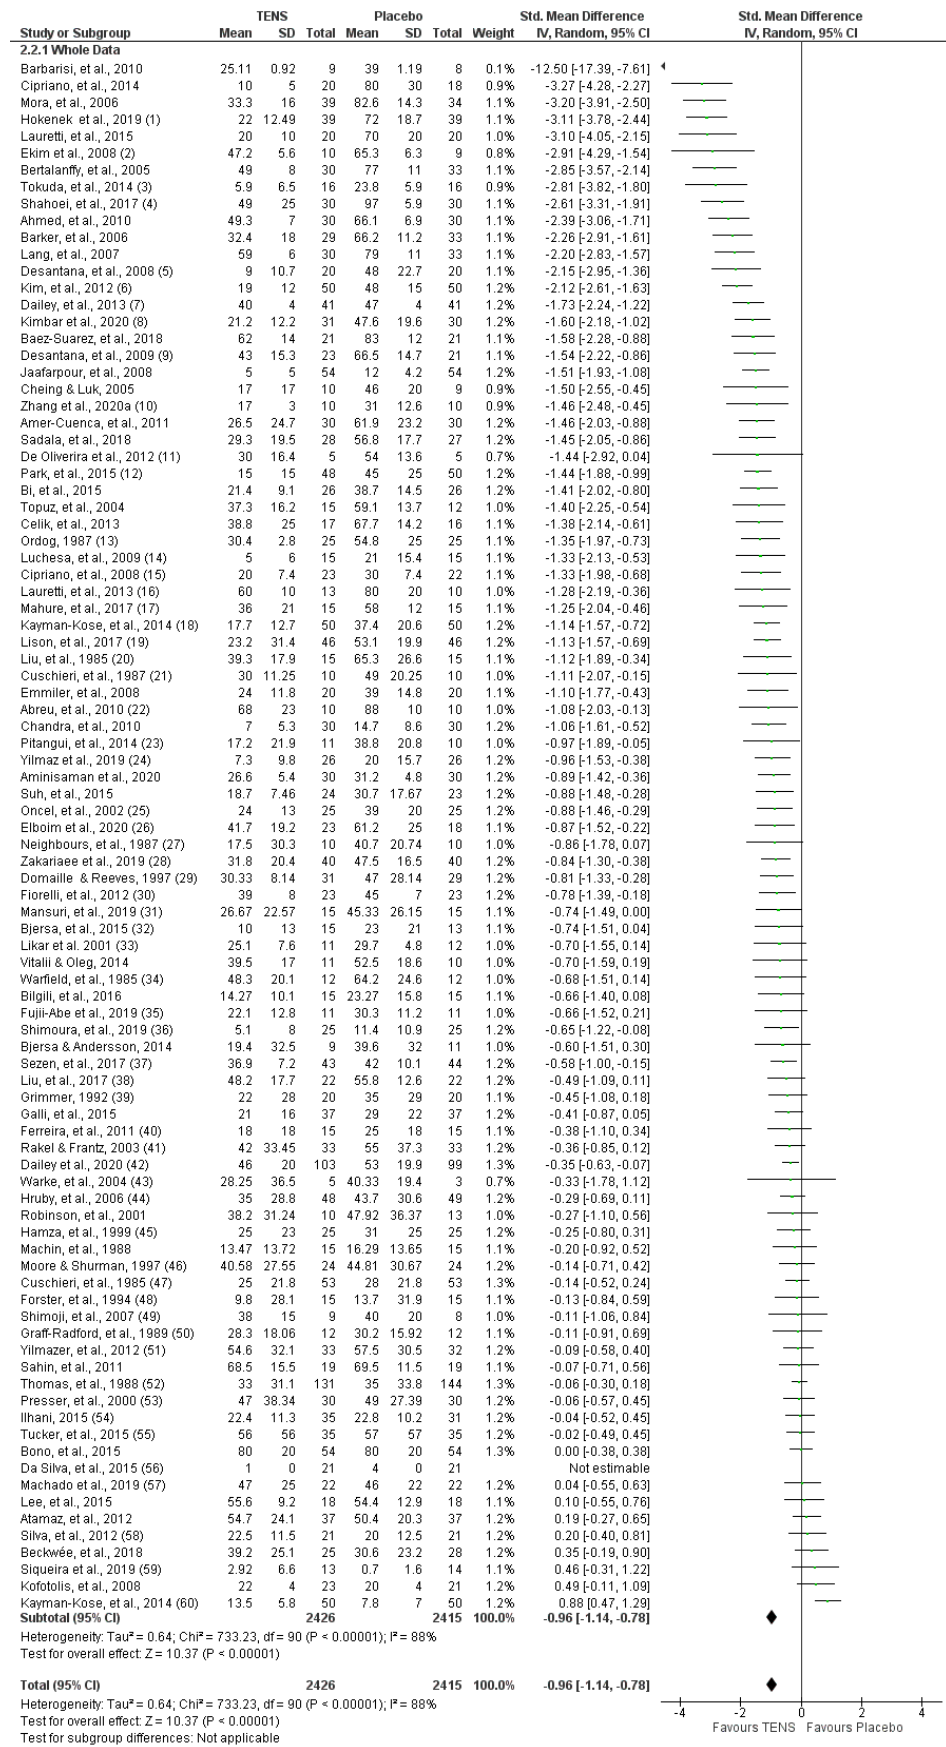

Figure A3 Forest plot of comparison TENS versus placebo. Outcome: pain intensity - expressed as mean (continuous) data.



Subgroup and sensitivity analyses – Methodological Characteristics

Subgroup analyses were conducted to explore the impact of methodological characteristics on effect sizes, tests of overall effect and statistical heterogeneity.

Risk of Bias

A subgroup analysis was conducted to explore the effect of RCTs having an overall low risk of bias (i.e., ≥6 low RoB items out of a total of 9 items). The test for subgroup differences was not statistically significant (Chi² = 1.96, df = 1 (P = 0.16)), suggesting that overall RoB does not modify the effect of TENS in comparison to placebo. There are enough trials and participants in each subgroup, so the covariate distribution is not concerning. There is substantial heterogeneity between results from the trials within each subgroup, therefore the validity of the treatment effect estimate for each subgroup is uncertain (Figure A4).

Forest Plot

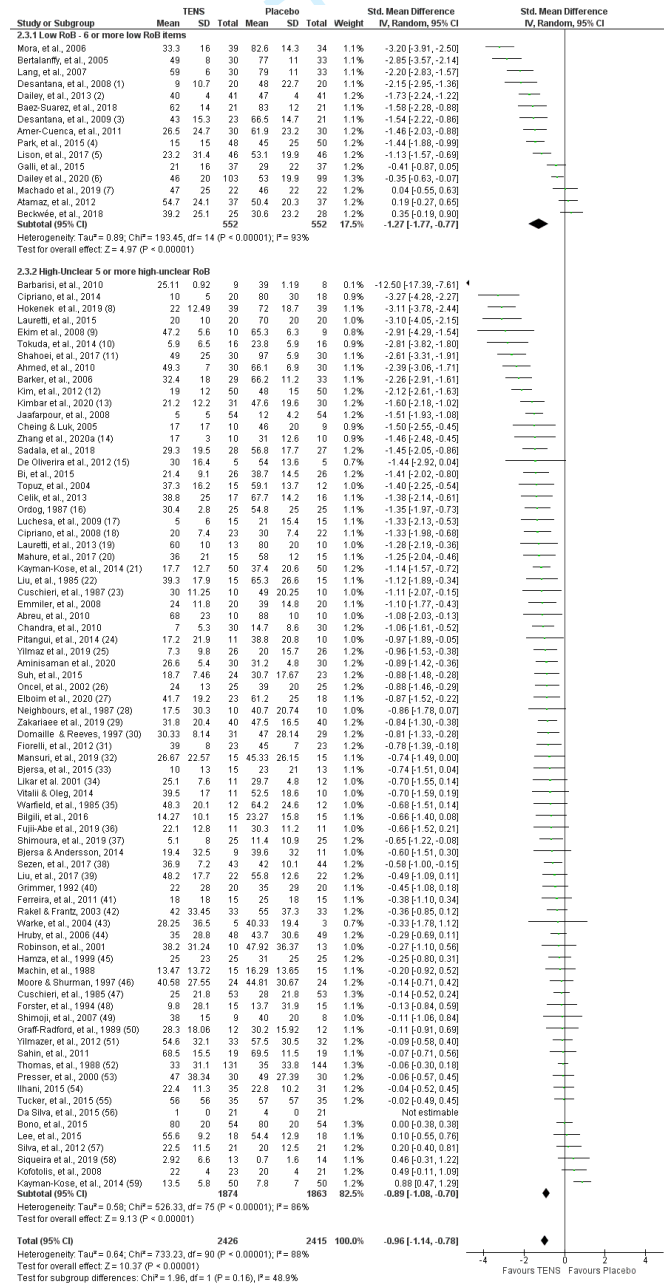

Figure A4 Forest plot of comparison TENS versus placebo with subgroup analysis to explore the effect of RCTs having an overall low risk of bias (i.e., ≥6 low RoB items).

MetaTENS\_Appendix\_BMJ0\_05-10-2021 – Supplementary File 1

1  
2  
3 *Sample size  $n \geq 100$  participants in the primary TENS group*

4 There were only 2 studies with extractable data [95](labour pain) [96](fibromyalgia) so analyses was  
5 not possible.  
6

7  
8 *Sample size  $n \geq 50$  participants in the primary TENS group*

9 A subgroup analysis was conducted to explore the effect of studies including 50 participants or more  
10 in the primary TENS group. The test for subgroup differences was not statistically significant ( $\text{Chi}^2 =$   
11  $1.50$ ,  $\text{df} = 1$  ( $P = 0.22$ ), suggesting that whether the trial arm sample size was less than 50  
12 participants does not modify the effect of TENS in comparison to placebo. There are enough trials  
13 and participants in each subgroup, so the covariate distribution is not concerning. There is  
14 substantial heterogeneity between results from the trials within each subgroup, therefore the  
15 validity of the treatment effect estimate for each subgroup is uncertain (Figure A5).

16 [Forest Plot].  
17

18  
19 *Forest Plot*  
20  
21  
22  
23  
24  
25  
26  
27  
28  
29  
30  
31  
32  
33  
34  
35  
36  
37  
38  
39  
40  
41  
42  
43  
44  
45  
46  
47  
48  
49  
50  
51  
52  
53  
54  
55  
56  
57  
58  
59  
60

For peer review only

MetaTENS\_Appendix\_BMJO\_05-10-2021 – Supplementary File 1

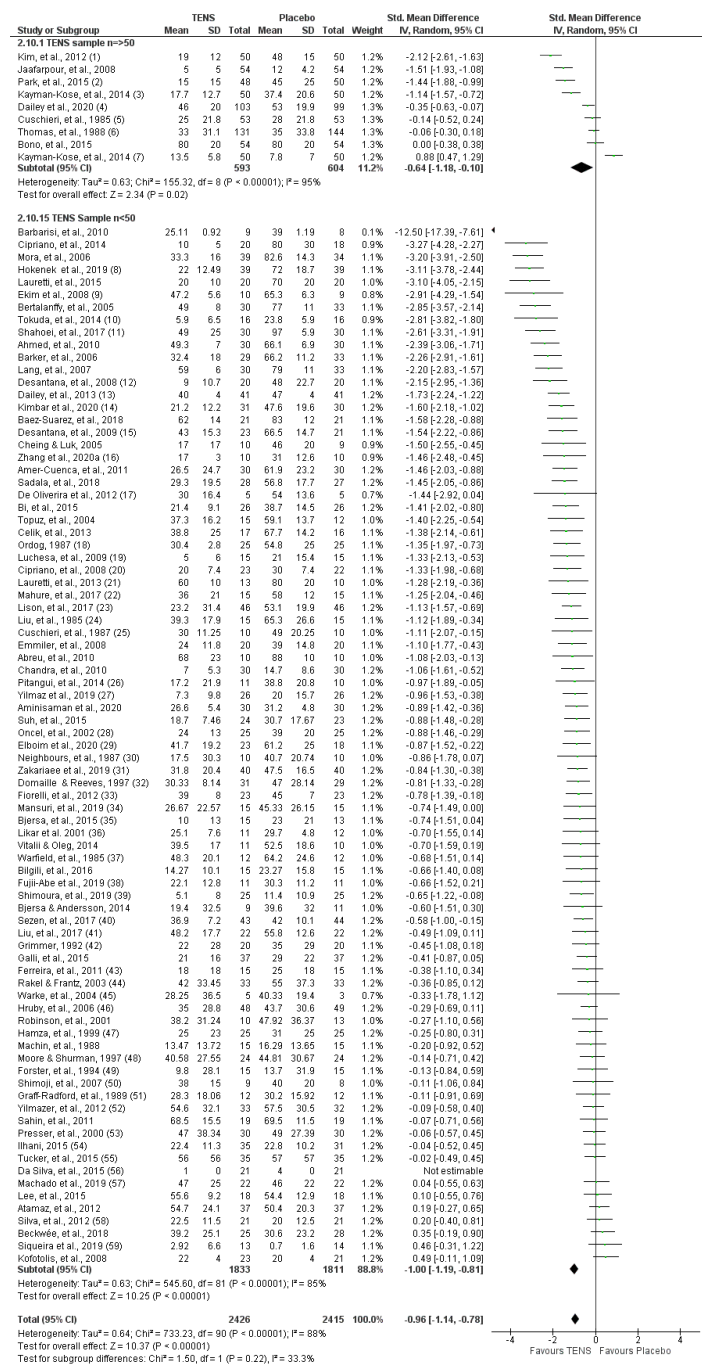

Figure A5 Forest plot of comparison TENS versus placebo with subgroup analysis to explore the effect of studies including 50 participants or more in the primary TENS group.

Estimation of sample size

There was a statistically significant difference in participant-reported pain intensity in favour of TENS both for RCTs that stated in the report that they had undertaken a sample size calculation (49 samples, 2847 participants, P < 0.00001, I<sup>2</sup> = 91%) and for those that did not (44 samples, 1994 participants, P < 0.00001, I<sup>2</sup> = 79%). The test for subgroup differences was statistically significant at our pre-specified threshold of P < 0.1 (Chi<sup>2</sup> = 3.63, df = 1, P = 0.06, I<sup>2</sup> = 72.4%), suggesting that the inclusion of a statement in the report that they had undertaken a sample size calculation does modify the effect of TENS in comparison to placebo. The overall SMD is -1.12 [-1.41, -0.84] in favour of TENS for reports that stated that a sample size calculation had been performed compared with -0.78 [-0.99, -0.57] for those that did not; therefore, the subgroup effect is quantitative. There are enough trials and participants in each subgroup, so the covariate distribution is not concerning.

1  
2  
3 However, the considerable unexplained heterogeneity combined with frequent unclear reporting of  
4 how sample size calculations were undertaken means that we have very low confidence in the  
5 precision of the treatment effect estimate for each subgroup.  
6

#### 7 *Type of placebo*

8 There was a statistically significant difference in participant-reported pain intensity in favour of TENS  
9 for RCTs used a placebo that did not deliver any electrical currents (74 samples, 3851 participants,  $P$   
10  $< 0.00001$ ,  $I^2 = 88\%$ ) and for those that used a placebo that administered pulsed electrical currents  
11 below sensory detection threshold (7 RCTs, 288 participants,  $P = 0.01$ ,  $I^2 = 85\%$ ), faded to zero  
12 current within one minute (7 RCTs, 549 participants,  $P = 0.002$ ,  $I^2 = 89\%$ ), with excessive long  
13 duration inter-stimulus intervals (2 RCTs, 83 participants,  $P = 0.02$ ,  $I^2 = 90\%$ ), or placebo pills (2 RCTs,  
14 70 participants,  $P = 0.0005$ ,  $I^2 = 0\%$ ). The test for subgroup differences was not statistically significant  
15 ( $\text{Chi}^2 = 2.03$ ,  $\text{df} = 4$  ( $P = 0.73$ ),  $I^2 = 0\%$ ).  
16  
17

#### 18 *TENS administered on its own or with other treatment*

19 There was a statistically significant difference in participant-reported pain intensity in favour of TENS  
20 both for reports that suggested that participants were allowed access to other treatments with the  
21 potential to contaminate pain scores (34 samples, 1804 participants,  $P < 0.00001$ ,  $I^2 = 87\%$ ) and  
22 those not allowed access to other treatments (57 samples, 3037 participants,  $P < 0.00001$ ,  $I^2 = 87\%$ ).  
23 The test for subgroup differences was statistically significant at our pre-specified threshold of  $P < 0.1$   
24 ( $\text{Chi}^2 = 3.59$ ,  $\text{df} = 1$ ,  $P = 0.06$ ,  $I^2 = 72.1\%$ ), suggesting that allowing participants access to other  
25 treatments does modify the effect of TENS in comparison to placebo. The overall SMD [95% CI] is -  
26 0.74 [-1.02, -0.46] in favour of TENS for reports that suggested that participants were allowed access  
27 to other treatments with the potential to contaminate pain scores compared with -1.09 [-1.32, -  
28 0.86] for those where participants appeared not to be allowed access to other treatments;  
29 therefore, the subgroup effect is quantitative. There are enough trials and participants in each  
30 subgroup, so the covariate distribution is not concerning. However, the substantial heterogeneity  
31 between results from the trials within each subgroup, combined with the unclear reporting of the  
32 consumption of analgesics and/or use of other treatments means that we have very low confidence  
33 in the precision of the treatment effect estimate for each subgroup.  
34  
35  
36  
37

#### 38 **Subgroup – Pain Characteristics**

##### 39 *Pain Duration - Acute versus chronic*

40 We conducted a subgroup analysis on pain condition categorised as acute and chronic pain  
41 according to broad categories of the International Association of Pain and the ICD-11 (i.e., in general  
42 terms a pain condition that has persisted for 3 months or more). The test for subgroup differences  
43 was not statistically significant ( $\text{Chi}^2 = 1.12$ ,  $\text{df} = 2$  ( $P = 0.57$ )), suggesting that the duration of painful  
44 condition does not modify the effect of TENS in comparison to placebo. There are enough trials and  
45 participants in each subgroup, so the covariate distribution is not concerning. . There is substantial  
46 heterogeneity between results from the trials within each subgroup, therefore the validity of the  
47 treatment effect estimate for each subgroup is uncertain (Figure A6).  
48  
49

##### 50 *Forest Plot*

51  
52  
53  
54  
55  
56  
57  
58  
59  
60

MetaTENS\_Appendix\_BMJO\_05-10-2021 – Supplementary File 1

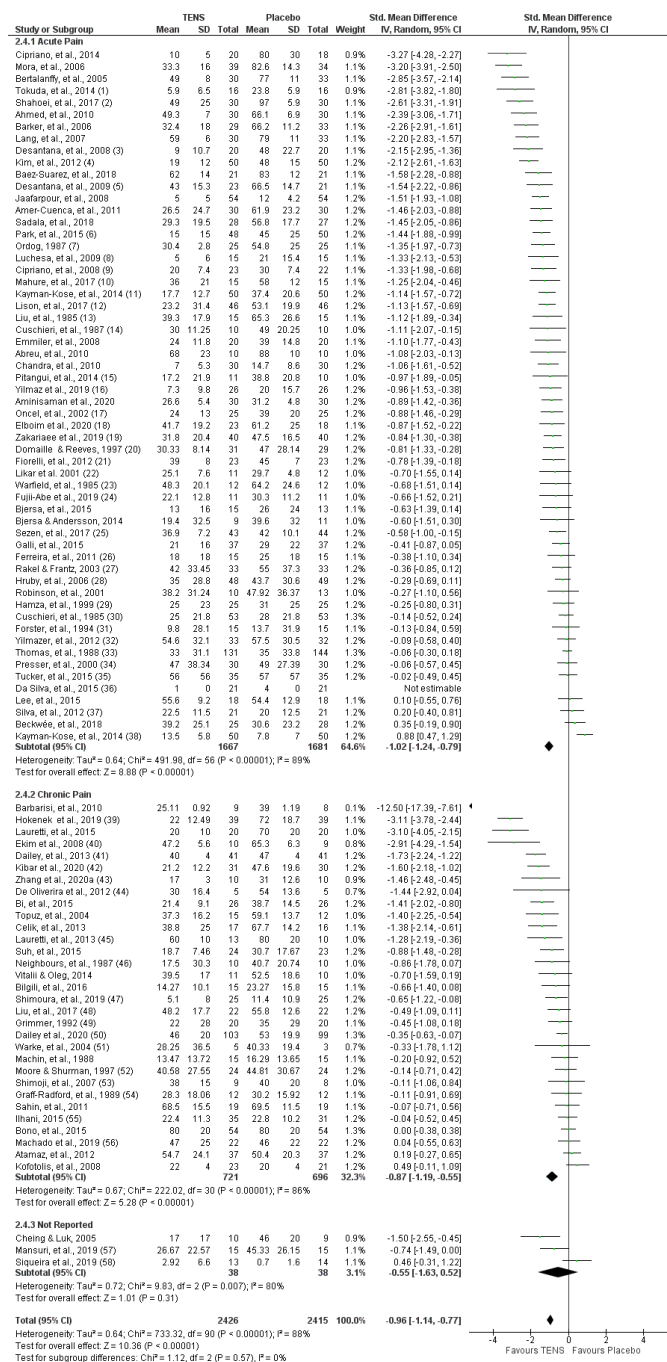

Figure A6 Forest plot of comparison TENS versus placebo with subgroup analysis to explore the effect of pain duration categorised as acute and chronic pain.

*Pain Conditions (diagnoses) – as described by RCT author*

We conducted a subgroup analysis on pain condition categorised according to authors' description given in the trial report. There was a statistically significant difference in favour of TENS for post-operative pain (36 samples, 1788, P < 0.00001, I<sup>2</sup> = 80%), procedural pain (10 samples, 682 participants, P = 0.001, I<sup>2</sup> = 88%), labour pain (4 sample, 397 participants, P = 0.05, I<sup>2</sup> = 95%) and fibromyalgia (3 samples, 307 participants, P = 0.04, I<sup>2</sup> = 91%). There were no statistically significant differences for back pain (9 samples, 364 participants, P = 0.06, I<sup>2</sup> = 89%) or migraine (3 samples, 230 participants, P = 0.19, I<sup>2</sup> = 97%). The remainder of the subgroups had fewer than 100 participants in the primary TENS trial arm. The test for subgroup differences was statistically significant (Chi<sup>2</sup> = 202.12, df = 23 (P < 0.00001); Figure A7), suggesting that the pain condition categorised according to that stated in the trial report significantly modifies the effect of TENS in

1  
2  
3 comparison to placebo. The treatment effect favours TENS over placebo for all categories of pain  
4 condition; therefore, the subgroup effect is quantitative. However, there are more trials (and  
5 participants) contributing data from some pain conditions than others, and there is considerable  
6 unexplained heterogeneity between the trials within each of these subgroups. A sensitivity analysis  
7 that removed subgroups with pooled sample sizes of fewer than 100 participants in the primary  
8 TENS trial arm was not statistically significant ( $\text{Chi}^2 = 1.25$ ,  $\text{df} = 5$ ,  $P = 0.94$ ), suggesting that the pain  
9 condition categorised according to that stated in the trial report does not significantly modify the  
10 effect of TENS in comparison to placebo. Therefore, the validity of the treatment effect estimate for  
11 each subgroup is uncertain.  
12  
13  
14

15 *Forest Plot*  
16  
17  
18  
19  
20  
21  
22  
23  
24  
25  
26  
27  
28  
29  
30  
31  
32  
33  
34  
35  
36  
37  
38  
39  
40  
41  
42  
43  
44  
45  
46  
47  
48  
49  
50  
51  
52  
53  
54  
55  
56  
57  
58  
59  
60

For peer review only



MetaTENS\_Appendix\_BMJO\_05-10-2021 – Supplementary File 1

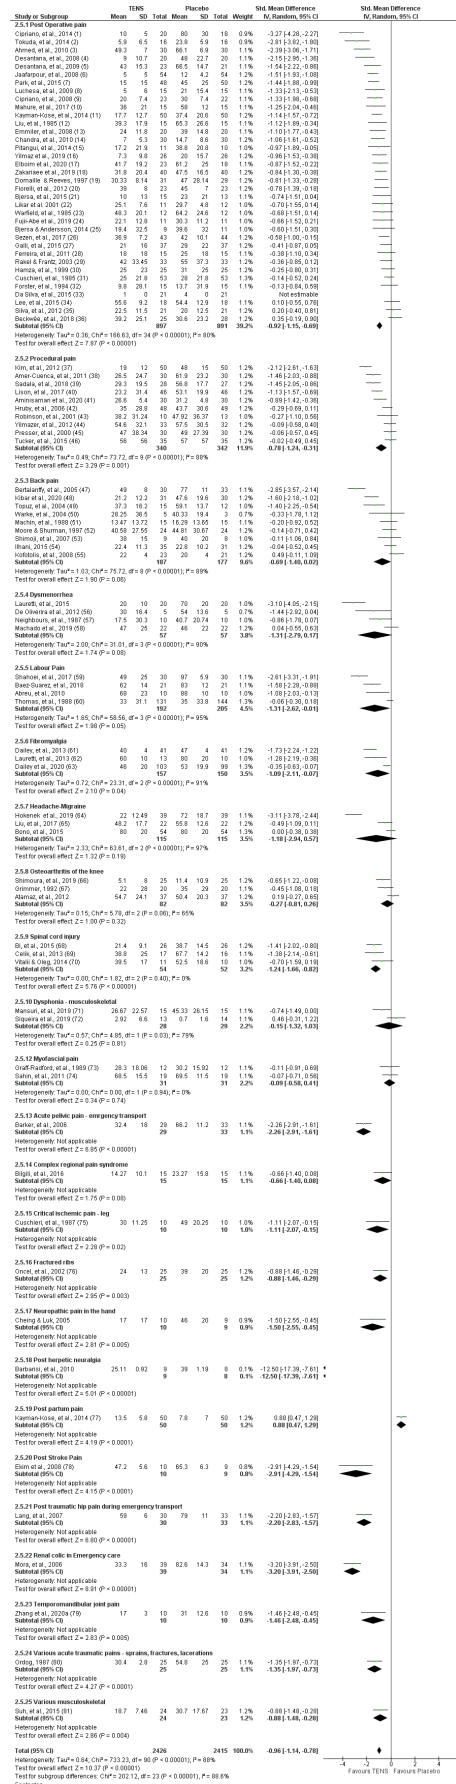

1  
2  
3 Figure A7 Forest plot of comparison TENS versus placebo with subgroup analysis to explore the  
4 effect of pain condition (diagnosis) categorised according to authors' description given in the trial  
5 report.  
6

#### 7 *Broad ICD-11 categories*

8 We conducted a subgroup analysis on pain condition categorised according to the ICD-11 categories  
9 with reference to the classification of top-level diagnoses for chronic pain conditions (i.e., chronic  
10 primary pain, chronic cancer-related pain, chronic postsurgical or posttraumatic pain, chronic  
11 neuropathic pain, chronic headache or orofacial pain, chronic secondary visceral pain, and chronic  
12 secondary musculoskeletal pain, [102]).  
13  
14

15 There was a statistically significant difference in participant-reported pain intensity in favour of TENS  
16 for chronic primary pain (20 samples, 1046,  $P = 0.0004$ ,  $I^2 = 86\%$ ). The remainder of the subgroups  
17 for chronic pain categorised according to ICD-11 had fewer than 100 participants in the primary  
18 TENS trial arm. There was a statistically significant difference in participant-reported pain intensity in  
19 favour of TENS for acute post-operative pain (36 samples, 1788,  $P < 0.00001$ ,  $I^2 = 80\%$ ), acute  
20 procedural pain (10 RCTs, 682 participants,  $P = 0.001$ ,  $I^2 = 88\%$ ), and labour pain (4 sample, 397  
21 participants,  $P = 0.05$ ,  $I^2 = 95\%$ ), as previously reported in the subgroup analysis for pain condition  
22 (diagnosis) categorised according to the authors description. In addition, there were no statistically  
23 significant differences in participant-reported pain intensity for acute visceral pain (excluding  
24 dysmenorrhea and labour pain (3 samples, 235 participants,  $P = 0.04$ ,  $I^2 = 95\%$ ). The remainder of the  
25 subgroups had fewer than 100 participants in the primary TENS trial arm (Figure A8). The test for  
26 subgroup differences was statistically significant ( $\text{Chi}^2 = 41.5$ ,  $\text{df} = 10$  ( $P < 0.00001$ ),  $I^2 = 76.0\%$ ).  
27  
28  
29

30 The sensitivity analysis that removed subgroups with pooled sample sizes of fewer than 100  
31 participants in the primary TENS trial arm was not a statistically significant ( $\text{Chi}^2 = 2.25$ ,  $\text{df} = 4$  ( $P$   
32  $= 0.69$ ),  $I^2 = 0\%$ ), suggesting that pain condition categorised according to the ICD-11 does not  
33 significantly modify the effect of TENS in comparison to placebo.  
34  
35  
36  
37  
38  
39  
40  
41  
42  
43  
44  
45  
46  
47  
48  
49  
50  
51  
52  
53  
54  
55  
56  
57  
58  
59  
60

MetaTENS\_Appendix\_BMJO\_05-10-2021 – Supplementary File 1

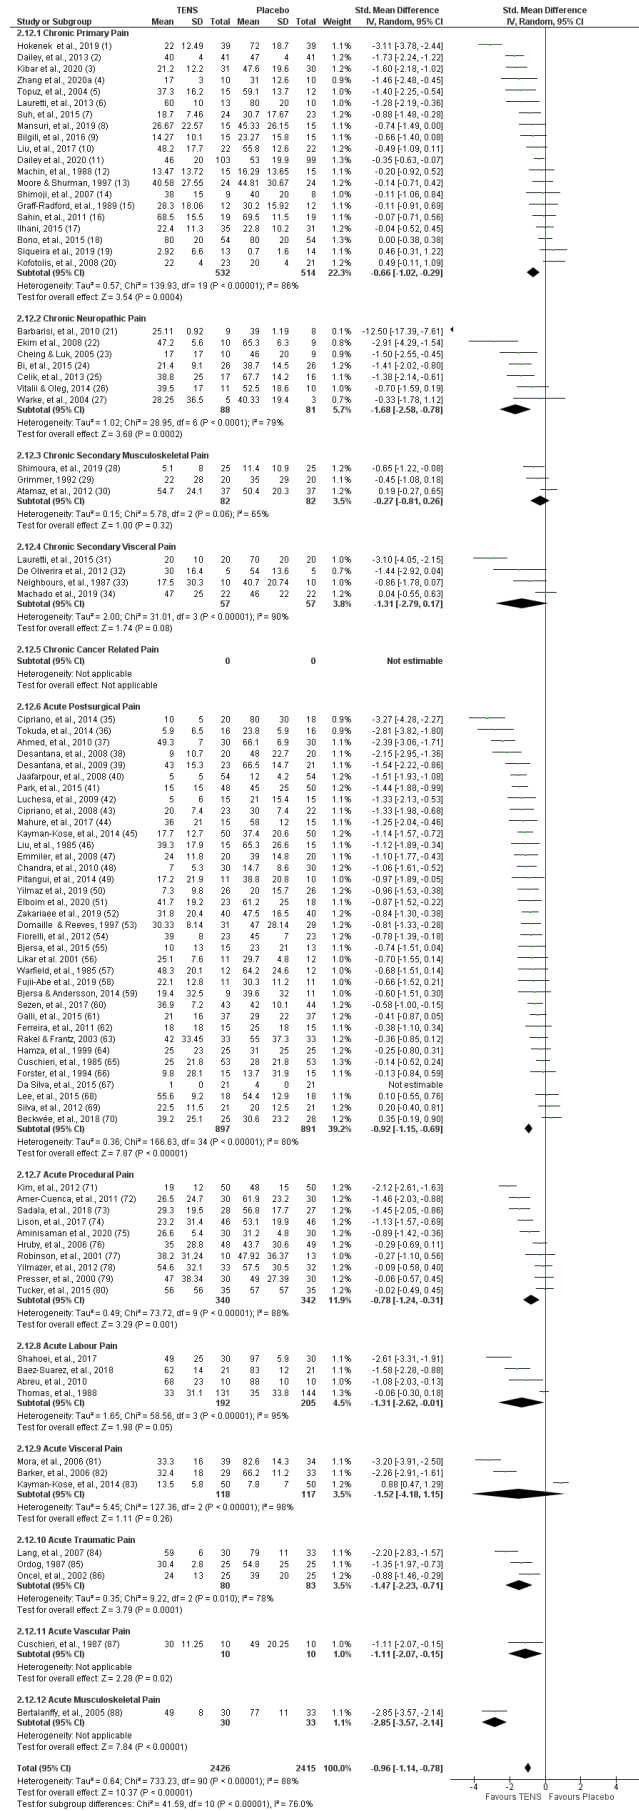

Figure A8 Forest plot of comparison TENS versus placebo with subgroup analysis to explore the effect of pain condition categorised according to authors' description given in the trial report.

### *Nociceptive or Neuropathic*

We conducted a subgroup analysis on pain condition categorised according to mechanistic descriptors of pain as predominantly nociceptive or neuropathic in origin (Kosek et al., 2016). There was a statistically significant difference in participant-reported pain intensity in favour of TENS for pain conditions categorised as predominantly nociceptive in origin (85 samples, 4650 participants,  $P < 0.00001$ ,  $I^2 = 88\%$ ) and for pain conditions categorised as predominantly neuropathic in origin (7 samples, 191 participants,  $P < 0.0001$ ,  $I^2 = 80\%$ ). The test for subgroup differences was statistically significant at our pre-specified threshold of  $P < 0.1$  ( $\text{Chi}^2 = 2.83$ ,  $\text{df} = 1$  ( $P = 0.09$ ),  $I^2 = 64.6\%$ ) but there were far fewer trials and participants in pooled neuropathic pain data, meaning that we have very low confidence in the sub-group analysis and the precision of the treatment effect estimate for each subgroup.

### *Structure Associated with Pain*

We conducted a subgroup analysis on conditions categorised by ourselves according to the predominant physiological structures/tissue involved in the painful experience as: Somatosensory (cutaneous); Musculoskeletal; Visceral; Neural; and Bone. We categorised post-operative procedures according to the targeted surgical structure and spasticity irrespective of cause as musculoskeletal.

There was a statistically significant difference in participant-reported pain intensity in favour of TENS for painful experiences with predominant involvement from somatosensory (10 samples, 610 participants,  $P = 0.002$ ,  $I^2 = 92\%$ ), musculoskeletal (26 samples, 1237 participants,  $P < 0.00001$ ,  $I^2 = 83\%$ ), visceral (44 samples, 2543 participants,  $P < 0.00001$ ,  $I^2 = 89\%$ ) and neural (7 samples, 191 participants,  $P = 0.0001$ ,  $I^2 = 80\%$ ) structures. There were no statistically significant differences in painful experiences with predominant involvement from bone (5 samples, 260 participants,  $P < 0.06$ ,  $I^2 = 89\%$ ). The test for subgroup differences was not statistically significant ( $\text{Chi}^2 = 7.62$ ,  $\text{df} = 4$  ( $P = 0.11$ ),  $I^2 = 47.5\%$ ).

### ***Plausibility Pain Characteristics - subgroup findings***

The subgroup analyses on pain characteristics found no persuasive evidence that the effects of TENS is moderated by pain diagnosis or characteristics. Thus, we posit that TENS may alleviate the intensity of pain, irrespective of pain diagnosis. Treatment effects of TENS were not modified when pain was categorised according to duration (acute versus chronic) or pain diagnoses according to RCT author. The direction subgroup effects were in favour of TENS but of different sizes (i.e., quantitative), although substantial heterogeneity between results from the trials within each subgroup undermined confidence in the magnitude of treatment effect estimates for each subgroup. Nevertheless, the magnitude of any putative subgroup differences was of a scale that would be too small to impact clinical decisions. In summary, the findings of our subgroup analyses on clinical characteristics are consistent with research that has found no relationships between the outcome and type of pain [103].

### ***Analysis of Publication Bias - TENS vs Placebo***

We visually inspected funnel plots to explore the likelihood of reporting bias if there were at least 10 RCTs in a meta-analysis. Egger's regression test showed significant evidence of a small-study effect ( $p < 0.0001$ ). Trim and fill analysis showed evidence of publication bias, indicating that eight trials might be missing to right of mean for an adjusted SMD of -0.78 (95% CI -0.995 to -0.565) (random-effects model, Figure A9).

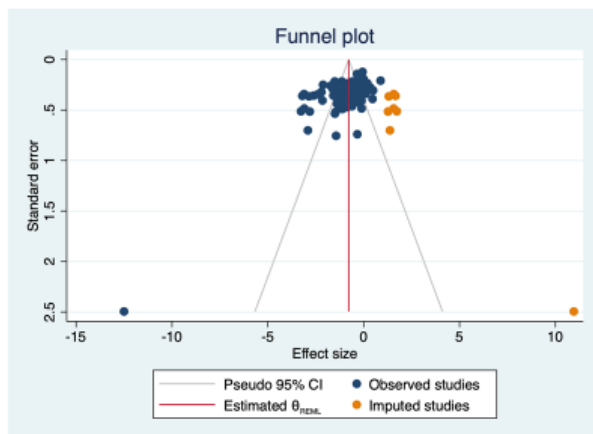

Figure A9 Funnel plot of TENS versus placebo comparison with trim and fill analysis. Actual results displayed in blue. Results corrected for the possibility of a publication bias displayed in orange.

**Outcome: ≥30% reduction in pain**

There were two RCTs that had extractable data with a total of 118 participants receiving TENS and 114 receiving placebo [89,104]. It was not possible to conduct an analysis of the proportion of participant-reported pain relief of ≥30% expressed as frequency (dichotomous) data because of insufficient data. Nonetheless, the RCT by [89] was of high quality and had a low RoB across 7 of 9 RoB items, with the largest trial arm sample size of any comparison with placebo in our review (TENS = 103 participants vs. placebo TENS = 99 participants). The study provides strong evidence that using TENS for 4 weeks produced clinically meaningful improvement in movement-evoked pain and pain at rest when compared with placebo TENS, for women experiencing pain associated with fibromyalgia who were on a stable medication.

**Outcome: ≥50% reduction in pain (i.e., substantial pain relief)**

It was possible to extract data from 9 RCTs (460 participants, 9 samples of participants). There were two crossover RCTs and both were deemed to have sufficient washout between interventions to eliminate contamination [105,106]. At the last during TENS or the first post-TENS intervention measurement point, there were 106/241 participants that reported pain relief of ≥50% or greater (responders) for TENS compared with 28/219 participants for any type of placebo. There was a statistically significant difference in the proportion of participants achieving substantial pain relief in favour of TENS with the risk ratio being 2.89 [2.02, 4.13] and no heterogeneity ( $I^2 = 0\%$ ; Figure A10). There are too few RCTs and participants to be entirely certain of the validity of the treatment effect estimate. Therefore, we did not calculate number needed to treat, nor undertake subgroup analyses to explore the effect of methodological or clinical characteristics on outcome.

*Forest plot*



Figure A10 Forest plot of comparison TENS versus placebo. Outcome: ≥50% reduction in pain. NOTE: Favours TENS on the right-hand side of the Forest plot.



### TENS versus no treatment - Analysis of effects

We considered an intervention as 'no treatment' if we were assured that the participants did not receive any other 'active' treatment. We did not include interventions described as controls that allowed patients any type of active treatment, including medication or exercise. Thus, RCTs that compared TENS in combination with a pharmacological agent versus a control consisting of the pharmacological agent on its own were not included in this analysis.

There were 16 RCTs that we categorised as comparing TENS with a no treatment intervention. One was a crossover RCT deemed to have enough washout between interventions to eliminate contamination [107].

#### Outcome: Pain intensity - expressed as mean (continuous) data

We extracted data at the last during TENS or the first post-TENS intervention measurement point from 10 RCTs (10 samples, 602 participant). There was a significant overall effect in favour of TENS (SMD -0.82; 95% CI -1.18, -0.46; Figure A11), and substantial heterogeneity ( $I^2 = 76\%$ ). There was insufficient data to undertake subgroup analyses to explore the effect of methodological nor clinical characteristics on outcome.

#### Forest plot

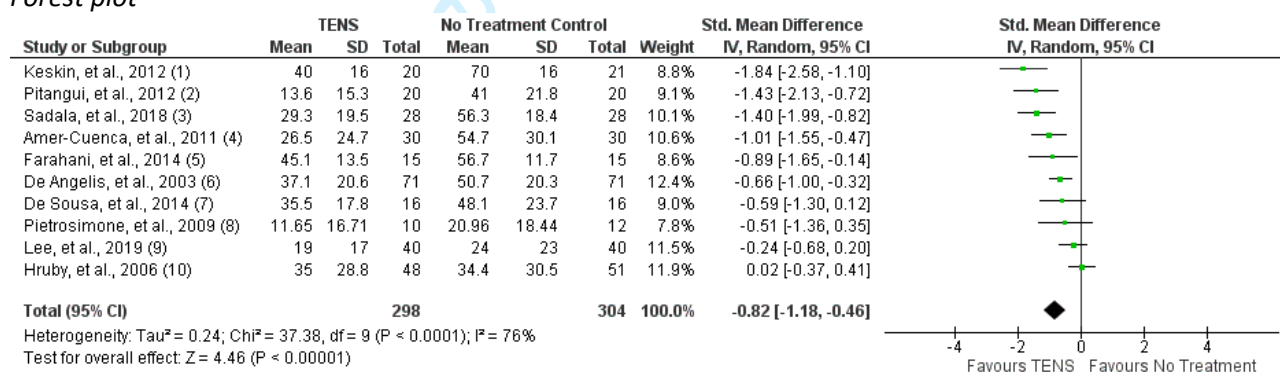

Figure A11 Forest plot of comparison TENS versus no treatment. Outcome: pain intensity - expressed as mean (continuous) data.

#### Analysis of publication bias – TENS vs No Treatment

We visually inspected funnel plots to explore the likelihood of reporting bias (Figure A12). Egger's regression test showed significant evidence of a small-study effect ( $p = 0.0878$ ). However, Trim and fill analysis showed no evidence of publication bias.



Figure A12 Funnel plot of TENS versus no treatment comparison.

**Outcome:  $\geq 30\%$  reduction in pain**

It was not possible to conduct an analysis of the proportion of participant-reported pain relief of  $\geq 30\%$  expressed as frequency (dichotomous) data because there were no RCTs with extractable data.

**Outcome:  $\geq 50\%$  reduction in pain**

It was not possible to conduct an analysis of the proportion of participant-reported pain relief of  $\geq 50\%$  expressed as frequency (dichotomous) data because of insufficient data (There was only one RCT with extractable data; [87]).

For peer review only

## TENS versus standard of care - Analysis of effects

We considered an intervention as 'standard of care' if trial authors considered the intervention or intervention(s) to be fully or part of 'common', 'routine', or 'standard' practice and/or care, irrespective of whether authors explicitly named the intervention as 'standard of care'. Interventions were either TENS compared head-to-head with a SoC intervention (i.e., TENS vs SoC) or TENS as an adjunct to a SoC intervention (i.e., TENS combined with SoC vs SoC alone).

There were 127 RCTs (127 samples) that we categorised as comparing TENS with a SoC intervention. There were 8 crossover RCTs and all were deemed to have sufficient washout between interventions to eliminate contamination [79,81,98,108-112]. We categorised 40 of these SoC interventions as RCTs predominantly exercise/physiotherapy based, 71 as predominantly pharmacologically based, 3 as exercise/physiotherapy combined with pharmacological, and 13 RCTs as neither exercise/physiotherapy nor pharmacological (other), and/or unclear.

### Outcome: Pain intensity - expressed as mean (continuous) data

We extracted data at the last during TENS or the first post-TENS intervention measurement point from 61 RCTs (61 samples, 3155 participants). There were five crossover RCTs and all were deemed to have sufficient washout between interventions to eliminate contamination [79,81,84,98,110]. There was a significant overall effect in favour of TENS (SMD -0.72; 95% CI-0.95, -0.50) and substantial heterogeneity ( $I^2 = 88\%$ ; Figure A13). The test for subgroup differences was not statistically significant ( $\text{Chi}^2 = 4.16$ ,  $\text{df} = 2$ ,  $P = 0.12$ ), suggesting that the nature of the SoC intervention does not modify the effect of TENS in comparison with SoC. There are enough trials and participants in each subgroup, so the covariate distribution is not concerning. There is substantial heterogeneity between results from the trials within each subgroup, therefore the validity of the treatment effect estimate for each subgroup is uncertain.

### Forest plot

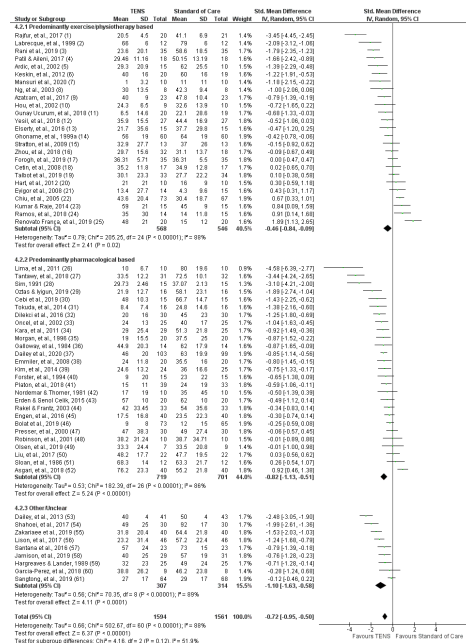

Figure A13 Forest plot of comparison TENS versus standard of care. Outcome: pain intensity - expressed as mean (continuous) data. Subgroup analysis comparing TENS either alone or when added to exercise/physiotherapy based interventions, pharmacologically based interventions, and SoC that was categorised as other/unclear.

### Analysis of publication bias – TENS vs SoC

We visually inspected funnel plots to explore the likelihood of reporting bias (Figure A14). Egger's regression test showed significant evidence of a small-study effect ( $p = 0.0062$ ). Trim and fill analysis showed evidence of publication bias, indicating that 11 trials might be missing to left of mean for an adjusted SMD of  $-1.032$  ( $-1.31, -0.76$ ) (random-effects model).

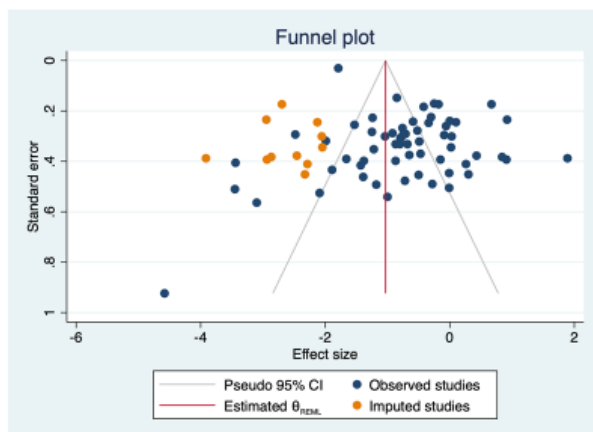

Figure A14 Funnel plot of TENS versus standard of care comparison with trim and fill analysis. Actual results displayed in blue. Results corrected for the possibility of a publication bias displayed in orange.

Interpretation: The finding that 11 trials might be missing to left of mean might be due to contamination by additional concurrent treatments in both TENS and comparator groups – participants may titrate concurrent treatments to achieve comparable pain in both groups. This may result in underestimation of TENS effects [113] [114]

#### Outcome: $\geq 30\%$ reduction in pain

There were two RCTs with extractable data. It was not possible to conduct an analysis of the proportion of participant-reported pain relief of  $\geq 30\%$  expressed as frequency (dichotomous) data because of insufficient data. The RCT by [89] had low RoB across 7 of 9 RoB items, and provided strong evidence that using TENS for 4 weeks produced clinically meaningful improvement in movement-evoked pain and pain at rest when compared with placebo TENS, for women experiencing pain associated with fibromyalgia who were on a stable medication and routine care. The study by Escortell-Mayor et al. [26] found no differences between TENS and manual therapy the proportion of participants achieving moderate reductions in neck pain of at least 20 mm on a 100 mm VAS (which is below our threshold of  $\geq 30\%$  reduction). Hence, it was not possible to conduct an analysis of the proportion of participant-reported pain relief of  $\geq 30\%$  expressed as frequency (dichotomous) data because of insufficient data.

#### Outcome: $\geq 50\%$ reduction in pain

There was one RCT (parallel group) with extractable data. It was not possible to conduct an analysis of the proportion of participant-reported pain relief of  $\geq 50\%$  expressed as frequency (dichotomous) data because of insufficient data.

## TENS versus Other Treatments - Analysis of effects

We considered an intervention as ‘another treatment’ if participants received a comparison intervention that had not been categorised as standard of care (SoC). The purpose of the analysis was to undertake a head-to-head comparison of TENS versus another treatment, so we extracted data that enabled isolation of effects between TENS and another treatment providing any additional care and/or treatment was standardised between groups, e.g., in instances when patients were also given pharmacological, exercise, or physiotherapy-based treatment. The nature of comparisons was either TENS compared head-to-head with another treatment either alone or on a background of care standardised between groups.

We identified 118 RCTs (131 samples) that compared TENS with at least one other treatment. There were four crossover RCTs and all were deemed to have sufficient washout between interventions to eliminate contamination [68,110,115,116]. There were 13 RCTs that compared TENS with more than one treatment intervention. We decided to include all comparisons in the meta-analysis and conducted a sensitivity analysis by removing multiple comparisons from RCTs to explore the effect of duplicate TENS data on outcome.

### **Outcome: Pain intensity - expressed as mean (continuous) data**

We extracted data at the last during TENS or the first post-TENS intervention measurement point from 67 RCTs (131 samples, 3327 participants, including duplicates from primary TENS arm).

We extracted data at the last during TENS or the first post-TENS intervention measurement point from 67 RCTs (131 samples, 3327 participants, including duplicates from primary TENS arm). There were 11 crossover RCTs and all were deemed to have sufficient washout between interventions to eliminate contamination [68,105,110,116-123].

There was not a statistically significant difference in participant-reported pain intensity (Test for overall effect:  $Z = 1.08$ ,  $P = 0.28$ ; Random-effects model; Figure A15) and this did not change following the sensitivity analysis that removed multiple samples from the same RCT (favouring samples that were in subgroups with multiple RCTs) and/or removed subgroups with fewer than 2 RCTs.

The test for subgroup differences was statistically significant ( $\text{Chi}^2 = 82.82$ ,  $df = 24$ ,  $P < 0.00001$ ). It was noted that there was a statistically significant difference in favour of percutaneous electrical nerve stimulation compared with TENS (4 samples, TENS = 157 participants,  $P < 0.0001$ ), but no other statistically significant differences for subgroups that had more than one RCT in the pooled data sample. The test for subgroup differences was still statistically significant after removing subgroups with fewer than 100 participants pooled in the TENS trial arm.

Subgroup analyses indicate that the type of treatment intervention used as a comparison significantly modifies the effect of TENS. The treatment effect favours TENS in some but not all comparisons; therefore, the subgroup effect is qualitative. However, there are more trials (and participants) contributing data from some of the subgroups, and there is considerable unexplained heterogeneity between the trials within each of these subgroups. Therefore, the validity of the treatment effect estimate for each subgroup is uncertain, as individual trial results are inconsistent.

We choose not to report the meta-analysis in the final report. There is a heterogeneous mix of comparators, the inclusion of duplicate data in the TENS arm, and sub-groups with too few comparisons (Figure A15).

MetaTENS\_Appendix\_BMJO\_05-10-2021 – Supplementary File 1

Forest plot

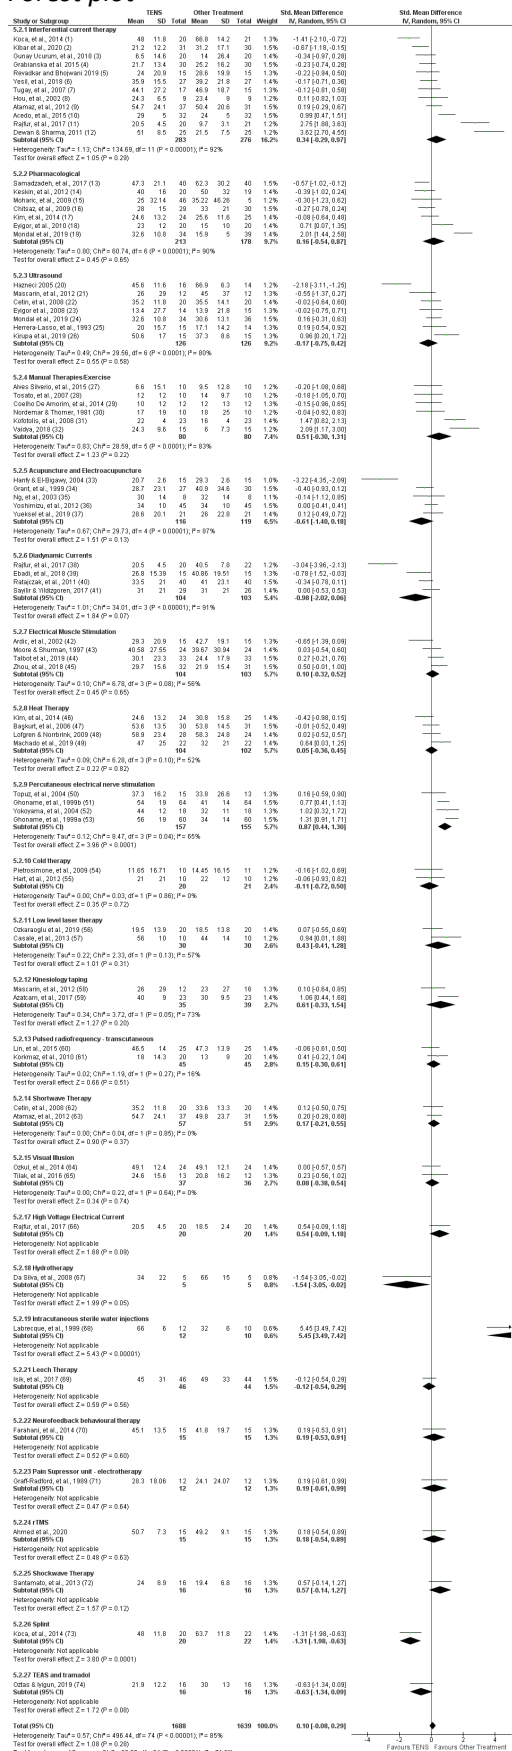

Review only



1  
2  
3 Figure A15 Forest plot of comparison TENS versus other treatment. Outcome: pain intensity -  
4 expressed as mean (continuous) data. Subgroup analysis comparing TENS with different treatment  
5 modalities.

6 ***Analysis of publication bias – TENS vs. Other treatment***

7 We did not undertake an analysis of publication bias because we choose not to report the meta-  
8 analysis in the final report. There is a heterogeneous mix of comparators, the inclusion of duplicate  
9 data in the TENS arm, and sub-groups with too few comparisons

10  
11  
12 **Outcome:  $\geq 30\%$  reduction in pain**

13 There were no RCTs with extractable data, so it was not possible to conduct an analysis of the  
14 proportion of participant-reported pain relief of  $\geq 30\%$  expressed as frequency (dichotomous) data  
15 because of insufficient data.

16  
17  
18 **Outcome:  $\geq 50\%$  reduction in pain**

19 There was one RCT of crossover design with extractable data and sufficient washout between  
20 interventions to eliminate contamination [105]. It was not possible to conduct an analysis of the  
21 proportion of participant-reported pain relief of  $\geq 50\%$  expressed as frequency (dichotomous) data  
22 because of insufficient data.  
23  
24  
25  
26  
27  
28  
29  
30  
31  
32  
33  
34  
35  
36  
37  
38  
39  
40  
41  
42  
43  
44  
45  
46  
47  
48  
49  
50  
51  
52  
53  
54  
55  
56  
57  
58  
59  
60

### High frequency TENS versus low frequency TENS - Analysis of effects

There were 37 RCTs that included at least one comparison of high versus low frequency TENS. There was insufficient extractable data to conduct a subgroup analysis of high versus low frequency TENS for any of the previous analyses of either adverse events or effects of interventions.

#### Outcome: Pain intensity - expressed as mean (continuous) data

We extracted data at the last during TENS or the first post-TENS intervention measurement point from 13 RCTs (13 samples, 468 participants, no crossover RCTs) that compared high frequency and low frequency TENS. There was not a statistically significant difference in participant-reported pain intensity when data was pooled from samples (SMD -0.19; 95%CI -0.43, 0.06; Figure A16).

#### Forest plot

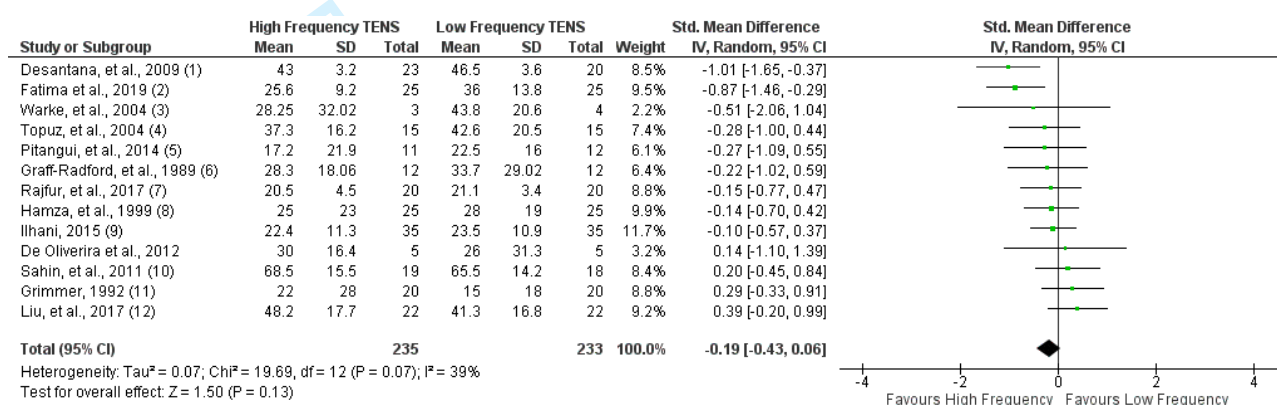

Figure A16 Forest plot of comparison high frequency TENS versus low frequency TENS. Outcome: pain intensity - expressed as mean (continuous) data.

#### Analysis of publication bias – High vs. low frequency TENS

We visually inspected funnel plots to explore the likelihood of reporting (Figure A17). Egger's regression test showed no evidence of a small-study effect (p = 0.8871). Trim and fill analysis showed no evidence of publication bias.

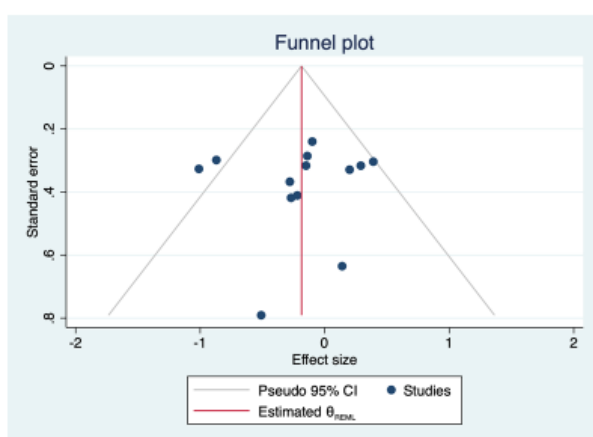

Figure A17 Funnel plot of high frequency versus low frequency TENS comparison.

#### Outcome: ≥30% reduction in pain

There was one RCT (parallel group) with extractable data [124]. It was not possible to conduct an analysis of high versus low frequency TENS for the proportion of participant-reported pain relief of ≥30% expressed as frequency (dichotomous) data because of insufficient data.

**Outcome:  $\geq 50\%$  reduction in pain**

It was possible to extract data from 4 RCTs (5 samples, 286 participants). There were two crossover RCTs and all were deemed to have sufficient washout between interventions to eliminate contamination [105,106]. We pooled 4 samples with 28/94 participants that reported pain relief of  $\geq 50\%$  or greater (responders) for high frequency TENS compared with 39/92 participants for low frequency TENS. This was just below our threshold of 100 participants per trial arm for conducting meta-analysis, although the Forest plot is presented for visual inspection (Figure A18).

**Forest plot**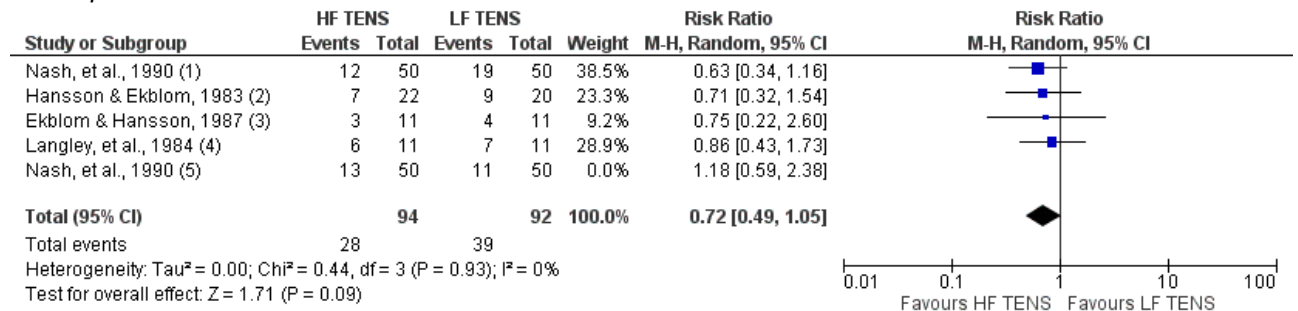

Figure A18 Forest plot of comparison high frequency TENS versus low frequency TENS. Outcome:  $\geq 50\%$  reduction in pain.

### Adverse events - Analysis of effects

Textual and numerical information related to adverse events was extracted directly from primary reports via cut and paste into a word document as summarised in the Online Table 4 (11\_OL-TABLE4\_AdverseEvents.pdf).

Often trial reports did not clearly distinguish adverse events related to the study or not, or whether they were likely a result of a worsening medical condition, including co-morbidity, medical procedures, or treatments other than TENS. Information related to adverse events was summarised and coded in an Excel spreadsheet for descriptive analysis. There were 245/381 reports that did not include a statement about the incidence of adverse events. Out of the 136 reports that included a statement of adverse events, 59/136 reports stated there were no adverse events any of the intervention groups during the RCT and 90/136 reports stated there were no adverse events related to TENS. There were 46 reports that stated the occurrence of adverse events that may be associated with TENS, none of which were deemed by authors to be a serious adverse event directly attributable to TENS. There was one report of the possibility that TENS may contribute to a serious adverse event in an RCT evaluating the effect of electrical stimulation on Botulinum Toxin A therapy in patients with chronic myofascial pain syndrome: *“There was a possible relationship between the treatment and spontaneous abortion. A 36-year-old woman had a spontaneous abortion that occurred 21 days after BTX-A injection and electrical stimulation.”* [125] p414. Adverse events associated with TENS were generally described as mild in severity and infrequent in occurrence and included skin irritation, tenderness/soreness and TENS discomfort. Worsening symptoms (e.g., increase in pain-soreness) was identified as a negative consequence of TENS, although often it was unclear whether trial authors considered this to an adverse event or lack of treatment efficacy.

#### Outcome: Relative Risk

We extracted ratio data from 18 RCTs (1587 participants) for meta-analysis by counting the number of adverse events, irrespective of severity. We were thorough in checking for double counting but not all reports were clear in disclosing adverse events so we cannot guarantee with certainty that there may be an occasional counting of two adverse arising from one participant.

There was not a statistically significant difference in the tally of adverse events between TENS (63 events, 805 participants) and the comparison group (95 events, 782 participants) with the risk ratio being 0.73 (95% CI 0.36, 1.48; Figure A19). The test for subgroup differences in adverse events when TENS was compared with a placebo control (6 RCTs, 828 participants) or active treatment comparison (12 RCTs, 759 participants) was not statistically significant ( $\text{Chi}^2 = 2.50$ ,  $\text{df} = 1$  ( $P = 0.11$ ),  $I^2 = 60.0\%$ ), suggesting that the type of comparison intervention does not modify the frequency of adverse effects associated with TENS. There are enough trials and participants in each subgroup, so the covariate distribution is not concerning. There is moderate and substantial heterogeneity between results from the trials within each subgroup, therefore, the validity of the treatment effect estimate for each subgroup is uncertain.

#### Forest plot



Figure A19 Forest plot of adverse events comparison TENS versus any comparison.

**Plausibility: Minor and infrequent adverse events from TENS**

Clinical experts claim that TENS hazards associated with TENS are minor and that there is minimal potential for serious, life threatening, adverse events [6,126]. This is consistent with our findings for our descriptive analysis that found that adverse events during and/or after TENS treatment were reported to be minor and included skin irritation, worsening symptoms and TENS discomfort. There were no reports of serious adverse events, although there was one report of a possible relationship between TENS contributing to a spontaneous abortion in a woman although this occurred 21 days after treatment. Having considered overall quality of available evidence, limitations in our review process and physiological and clinical plausibility we are confident that there is minimal harm associated with TENS, although our estimate of risk ratio lacked precision.

### SECTION 3 - Potential biases in the review process

#### **Search strategy and screening process - Limitations**

Our search strategy for RCTs was broad and involved screening of over 8000 records. We also conducted a search specifically for systematic reviews for a separate analysis and this enabled cross referencing of RCTs between searches. Thus, we are confident that our search was comprehensive.

Our screening processes identified RCTs that had optimised TENS intervention in terms of generating a strong non-painful TENS sensation at (or close to) the site of pain, irrespective of variations in electrical characteristics of currents produced by a 'standard TENS device'. We did not include in our evaluation TENS-like devices (e.g., interferential therapy, transcutaneous electrical acupoint stimulation) that may have been delivered in such a way as to generate a strong comfortable paraesthesia with similar qualities as that experienced with 'standard TENS'. None of our analyses to date suggest that between or within trial variations in specific electrical characteristics of TENS influences clinical outcome to any significant degree.

#### **Effects size estimates - Limitations in the analysis (confounding factors)**

Much heterogeneity remained unexplained following subgroup analyses exploring methodological and patient characteristics.

#### **Sample size**

We attribute the presence of statistical heterogeneity to the inclusion of lots of RCTs with small sample sizes. It is a matter for debate whether we should have used a higher threshold for trial arm size, although our subgroup analysis of trial arm sizes of  $\geq 30$  and  $\geq 50$  participants failed to detect subgroup effects.

RCTs with large total sample sizes compromised statistical power by having multiple intervention groups that markedly reduced the number of participants randomised to trial arms and increased imprecision of estimates of treatment effects.

#### **Quality of reporting - observations**

Generally, trial reports lacked recommended levels of detail suggested for reporting TENS trials [113]. It was noticeable that many trial reports focussed on physiological and clinical plausibility of findings rather than the integrity of methods, data, and analyses.

#### **Trial Design - Pragmatic and Exploratory**

We included a spectrum of pragmatic and explanatory trials, and it is known that pragmatic trials tend to have higher standard deviations because they recruit a wider range of participants but are more useful to inform options for care in clinical settings [127]. Some RCTs were overly complicated in design and had too many comparison groups and outcome measures, at the expense statistical power.

#### **Cross-over studies - Sensitivity analysis**

We included cross-over studies and pre-specified that we would only extract data from the first phase unless we considered there to be sufficient duration of washout between crossover to prevent carry-over effects. We were only able to extract data from a few cross-over trials and in all instances, we considered there to be sufficient washout as evidence suggests that the effects of TENS are generally short-lived. We conducted sensitivity analyses and found that removal of crossover trials did not affect findings of the analysis

- TENS versus placebo
  - All trials



- SMD [95% CI] = -0.96 [-1.14, -0.78] Test for overall effect:  $Z = 10.37$  ( $P < 0.00001$ ) Heterogeneity:  $\text{Tau}^2 = 0.64$ ;  $\text{Chi}^2 = 733.23$ ,  $df = 90$  ( $P < 0.00001$ );  $I^2 = 88\%$ ).
- After removal of [84,98,128]
  - SMD [95%CI] = -0.97 [-1.16, -0.79] Test for overall effect:  $Z = 10.35$  ( $P < 0.00001$ ) Heterogeneity:  $\text{Tau}^2 = 0.66$ ;  $\text{Chi}^2 = 726.33$ ,  $df = 88$  ( $P < 0.00001$ );  $I^2 = 88\%$ ).

Analysing crossover data as if parallel group, normally requires generic inverse variance to correct for correlation between groups using the same participants (paired data), but we argue that has negligible impact on outcome because generic inverse variance increases confidence intervals and this will be negated by the influence of the overwhelming number of data points from parallel group studies.

### ***Appropriateness of TENS***

The electrical characteristics for TENS and the treatment regimens were diverse, but usually appropriate for clinical context, e.g., a single dose of less than five minutes for some procedural pains, to single doses one hour or a single daily dose over a period of a few week. The included studies all administered TENS at a strong intensity that we consider to be optimal. It was difficult to ascertain whether electrical characteristics and/or treatment regimens were advisory or prescribed for longer duration multiple treatment studies. Few studies formally measured frequency of home usage and/or whether there had been adherence to instructions on how best to self-administer TENS.

Many RCTs delivered TENS within clinical settings, which is appropriate for in-patient populations with acute pain, but less so for out-patient populations with chronic pain, where it would be more ecologically valid to monitor outcomes following a period of treatment that was self-administered home use. As TENS is a self-administered technique-based intervention, we argue that RCTs using an enriched enrolment randomised withdrawal design would have utility. There were no such trials in the included studies.

### ***Measurement time points***

Few TENS regimens lasted more than one month even for chronic pain. Follow-up after a course of treatment was short and no more than one month. We pre-specified analysis of data during or immediately after a single TENS intervention to account for such diversity so our analysis provides evidence of 'immediate' during treatment effects. We feel that this is ecologically valid but does not address the longer-term outcomes of TENS.

### ***Contamination***

We included data of interventions with concurrent use of pharmacological and/or non-pharmacological treatments (e.g., exercise, hot/cold therapies), as background or as rescue, formally as part of the design of the study. Contamination of estimates of treatment effect in RCTs and meta analyses has been recognised as an issue in RCTs of medical interventions [129].

Previously, we have argued that pain scores may be compromised when participants have access to analgesics because participants may titrate analgesic consumption to achieve tolerable levels of pain intensity in each intervention group [114]. Previously we have reported that contamination from the simultaneous use of other treatments is likely to bias toward underestimating treatment effects associated with TENS for pain [113]. We have argued that the influence of TENS on analgesic consumption, and associated side effects, may be a more meaningful measure and we are planning to evaluate the effect of TENS on analgesic consumption.

### ***Risk of Performance Bias (blinding participant)***

We used an aide memoire adapted for TENS to support consistency of judgements for risk of bias.

Participant blinding has been central to the debate about the efficacy of TENS. Previous systematic reviews have managed judgements of performance bias associated with blinding participants and therapists inconsistently with some reviewers awarding high risk of performance bias arguing that it is impossible to blind participants to the sensory experience associated with TENS. We argue that the key to blinding is whether participants are uncertain whether an intervention is 'functioning properly' so that participants in treatment and placebo groups are uncertain whether they have received appropriate treatment. Many trials used a modified TENS device without current output coupled with pre-study briefings to create uncertainty about whether a treatment is 'functioning properly'. This has been shown to mitigate over-estimation of effects associated with knowing which intervention is 'placebo' even when participants experience TENS sensations (see discussion in [8]). There were few RCTs that assessed the credibility and outcome of blinding of participants, those that did reported that blinding of this nature was successful.

### **Adverse events - Limitations in the analysis**

All included RCTs focussed on treatment effects rather than adverse events. Adverse effects were rarely pre-specified as an outcome in trial reports and when they were methods and procedures to capture adverse effect data was unclear. We found a lack of clarity in reports and especially whether the likely cause of adverse events was related to TENS or concurrent treatment such as medication, or other medical procedures such as surgery. Some reports categorised worsening symptoms as an adverse event rather treatment failure.

Many reports stated 'no significant adverse effects occurred in the study' or 'there were no side effects in either group' but did not provide comparative numerical data (e.g., tabulated). When pooling data for meta-analysis, we only extracted data as 'zero' if there was clear numerical data or there was a statement that no adverse events occurred in a group, and this was accompanied by numerical data of the occurrence of at least one event in the comparator group(s).

Overall, our analysis is susceptible to bias associated with unclear and selective reporting of adverse events as most investigators reported spontaneous detection of adverse events based on ill-defined criteria. Characterisation and extraction of data to pool for meta-analysis for adverse events was imprecise because most reports inadequately described the monitoring, determination, and analysis. Criteria to recognise adverse events were absent, as were criteria for categorising seriousness. Thus, our estimate of risk ratio for the occurrence of adverse events lacked precision and there is still a need for more robust data.

There are generally few published studies of adverse effects on TENS. Evidence suggests a higher incidence of skin reactions when using monophasic pulsed electrical currents. A laboratory study by [130] found that 52% of 25 healthy participants experienced adverse skin reactions to 10 minutes of subsensory monophasic pulsed transcutaneous electrical stimulation at the knee compared which was higher than reported rates in previous studies using asymmetrically biphasic pulsed electrical currents, which was only 4%. Most studies in our analysis used biphasic pulsed electrical currents.

## SECTION 4 - Certainty and Quality of Evidence

### GRADE Methodology

GRADE = Grades of Recommendation, Assessment, Development and Evaluation

GRADE judgements were undertaken independently by MIJ and CAP (GJ and PGW as arbiters).

We used GRADEPro software and the Guideline development tool to conduct the assessment of evidence and create evidence tables <https://gradepr.org/>.

Certainty was assessed against the following criteria and if necessary downgraded:

- Risk of bias - Serious (- 1) or very serious (- 2)
- Inconsistency- Serious (- 1) or very serious (- 2)
- Indirectness - Serious (- 1) or very serious (- 2)
- Imprecision - Serious (- 1) or very serious (- 2)
- Publication bias – Strongly suspected (- 1)

GRADE judgements of pooled effects for outcomes were:

- Very low - The true effect is probably markedly different from the estimated effect
- Low - The true effect might be markedly different from the estimated effect
- Moderate - The authors believe that the true effect is probably close to the estimated effect
- High - The authors have a lot of confidence that the true effect is like the estimated effect.

We created an Aide Memoire to assist decision making (available on request from [m.johnson@leedsbeckett.ac.uk](mailto:m.johnson@leedsbeckett.ac.uk)). The Aide Memoire was based on the GRADE handbook, Domain-specific guidance for writing useful explanations – from Cochrane and an item checklist developed by [131]

**GRADE: Summary of Findings**

**TENS versus Placebo**

**TENS versus placebo for pain intensity at last during or first post intervention measurement point**

| Certainty assessment             |              |               |              |             |                  |                               | Summary of findings                                                      |           |                          |                                                                               |                           |
|----------------------------------|--------------|---------------|--------------|-------------|------------------|-------------------------------|--------------------------------------------------------------------------|-----------|--------------------------|-------------------------------------------------------------------------------|---------------------------|
| Participants (studies) Follow-up | Risk of bias | Inconsistency | Indirectness | Imprecision | Publication bias | Overall certainty of evidence | Study event rates (%)                                                    |           | Relative effect (95% CI) | Anticipated absolute effects                                                  |                           |
|                                  |              |               |              |             |                  |                               | With Placebo (any) at last during or first post intervention measurement | With TENS |                          | Risk with Placebo (any) at last during or first post intervention measurement | Risk difference with TENS |

**Pain Intensity Rating (assessed with: 0-10 intensity scale (VAS/NRS))**

|                |                          |                      |                          |                          |                   |               |      |      |   |   |                                                     |
|----------------|--------------------------|----------------------|--------------------------|--------------------------|-------------------|---------------|------|------|---|---|-----------------------------------------------------|
| 4841 (91 RCTs) | not serious <sup>a</sup> | serious <sup>b</sup> | not serious <sup>c</sup> | not serious <sup>d</sup> | none <sup>e</sup> | ⊕⊕⊕○ Moderate | 2415 | 2426 | - | - | <b>SMD 0.96 SD lower</b> (1.14 lower to 0.78 lower) |
|----------------|--------------------------|----------------------|--------------------------|--------------------------|-------------------|---------------|------|------|---|---|-----------------------------------------------------|

**Reduction of pain intensity of 50% or more**

|              |             |                          |                          |                      |                                                  |                       |                |                 |                               |               |                                                       |
|--------------|-------------|--------------------------|--------------------------|----------------------|--------------------------------------------------|-----------------------|----------------|-----------------|-------------------------------|---------------|-------------------------------------------------------|
| 460 (9 RCTs) | not serious | not serious <sup>f</sup> | not serious <sup>c</sup> | serious <sup>g</sup> | publication bias strongly suspected <sup>e</sup> | ⊕⊕○○ Low <sup>e</sup> | 28/219 (12.8%) | 106/241 (44.0%) | <b>RR 2.89</b> (2.02 to 4.13) | 128 per 1,000 | <b>242 more per 1,000</b> (from 130 more to 400 more) |
|--------------|-------------|--------------------------|--------------------------|----------------------|--------------------------------------------------|-----------------------|----------------|-----------------|-------------------------------|---------------|-------------------------------------------------------|

CI: confidence interval; RR: risk ratio; SMD: standardised mean difference

**Explanations**

- a. Not serious. Over there was low or unclear RoB, except for sample size. There was low RoB for participant and assessor bias. We considered low sample size within inconsistency
- b. Serious. Point estimates varied moderately; Generally, confidence intervals overlapped, although not all overlapped at least one point estimate. The direction of effect was consistent; The magnitude of statistical heterogeneity was high (e.g., I<sup>2</sup> >60%) and unexplained and may be associated with the contribution from small sized studies as detected by Egger's test. We downgraded (-1) for the combined effects of unexplained heterogeneity and possible publication bias associated with small study effect.
- c. Not serious. The populations and interventions in included studies were highly applicable. The outcome was directly measured and in a sufficient timeframe. The conclusions were based on direct comparisons
- d. Not serious. Pooled data sample size does meet pre-specified (e.g., 500 participants per trial arm). Magnitude of median study sample size was low (<100 participants); Number of included studies was high (>10 studies); Overall effect estimate confidence intervals showing the possibility of an effect above the threshold of important benefit.
- e. Not serious. Visual inspection of Funnel plots suggested possible asymmetry and Egger's regression test showed evidence of a small-study effect (p < 0.0001). Trim and fill analysis indicated that eight trials might be missing to the right of the mean for an adjusted SMD of -0.78 (95% CI -0.995 to -0.565) from -0.96 (95% CI -1.14, -0.78). We decided not to downgrade for this item but considered the impact of small study effect under inconsistency.
- f. Not serious. Point estimates varied moderately; All confidence intervals overlapped one point estimate. The direction of effect was consistent. The magnitude of statistical heterogeneity was low (e.g., I<sup>2</sup> >0%)
- g. Serious. Magnitude of median study sample size was low (<100 participants) and does not meet pre-specified criteria for number of participants for pooled data (≥500 participants per trial arm). Number of included studies was moderate (e.g., 5-10 studies); Outcome was a common event (e.g., >1/100). We downgraded (-1).

**TENS versus No Treatment****TENS versus no treatment (waiting list control) for pain intensity at last during or first post intervention measurement point**

| Certainty assessment                                                  |                          |                      |                          |                      |                   |                               | Summary of findings                      |           |                          |                                               |                                                        |
|-----------------------------------------------------------------------|--------------------------|----------------------|--------------------------|----------------------|-------------------|-------------------------------|------------------------------------------|-----------|--------------------------|-----------------------------------------------|--------------------------------------------------------|
| Participants (studies) Follow-up                                      | Risk of bias             | Inconsistency        | Indirectness             | Imprecision          | Publication bias  | Overall certainty of evidence | Study event rates (%)                    |           | Relative effect (95% CI) | Anticipated absolute effects                  |                                                        |
|                                                                       |                          |                      |                          |                      |                   |                               | With No treatment (waiting list control) | With TENS |                          | Risk with No treatment (waiting list control) | Risk difference with TENS                              |
| <b>Pain Intensity Rating - last during or first post intervention</b> |                          |                      |                          |                      |                   |                               |                                          |           |                          |                                               |                                                        |
| 602 (10 RCTs)                                                         | not serious <sup>a</sup> | serious <sup>b</sup> | not serious <sup>c</sup> | serious <sup>d</sup> | none <sup>e</sup> | ⊕⊕○○<br>Low                   | 304                                      | 298       | -                        | -                                             | SMD <b>0.82 SD lower</b><br>(1.18 lower to 0.46 lower) |

CI: confidence interval; RR: risk ratio; SMD: standardised mean difference

**Explanations**

- a. Not serious. Low or unclear RoB except for sample size. Possibility that participants know they are not receiving treatment in some studies. We did not downgrade
- b. Serious. Point estimates did not vary widely; Confidence intervals had substantial overlap (all confidence intervals overlap at least one of the included studies point estimate); The direction of effect was consistent; The magnitude of statistical heterogeneity was high (e.g., I<sup>2</sup> >60%). We downgraded (-1)
- c. Not serious. The populations and interventions in included studies were highly applicable. The outcome was directly measured and in a sufficient timeframe. The conclusions were based on direct comparisons
- d. Serious. Pooled data sample size does NOT meet pre-specified (e.g., 500 participants per trial arm). Magnitude of median study sample size was low (<100 participants); Number of included studies was high (>10 studies); Overall effect estimate confidence intervals showing the possibility of an effect above the threshold of important benefit. We downgraded (-1) because pooled data sample size does NOT meet pre-specified
- e. Egger's regression test showed potential evidence of a small-study effect (p = 0.0878). although trim and fill analysis showed no evidence of publication bias.

**TENS versus Standard of Care (SoC)**

**TENS versus treatment(s) used as standard of care for pain intensity at last during or first post intervention measurement point**

| Certainty assessment             |                          |                      |                          |                          |                                                  |                               | Summary of findings   |           |                          |                              |                                                       |
|----------------------------------|--------------------------|----------------------|--------------------------|--------------------------|--------------------------------------------------|-------------------------------|-----------------------|-----------|--------------------------|------------------------------|-------------------------------------------------------|
| Participants (studies) Follow-up | Risk of bias             | Inconsistency        | Indirectness             | Imprecision              | Publication bias                                 | Overall certainty of evidence | Study event rates (%) |           | Relative effect (95% CI) | Anticipated absolute effects |                                                       |
|                                  |                          |                      |                          |                          |                                                  |                               | With Standard of Care | With TENS |                          | Risk with Standard of Care   | Risk difference with TENS                             |
| <b>Pain Intensity Rating</b>     |                          |                      |                          |                          |                                                  |                               |                       |           |                          |                              |                                                       |
| 3155 (61 RCTs)                   | not serious <sup>c</sup> | serious <sup>d</sup> | not serious <sup>a</sup> | not serious <sup>e</sup> | publication bias strongly suspected <sup>b</sup> | ⊕⊕○○<br>Low                   | 1561                  | 1594      | -                        | -                            | <b>SMD 0.72 SD lower</b><br>(0.95 lower to 0.5 lower) |

CI: confidence interval; RR: risk ratio; SMD: standardised mean difference

**Explanations**

- a. Indirectness - Not serious. The populations and interventions in included studies were highly applicable. The outcome was directly measured and in a sufficient timeframe. The conclusions were based on direct comparisons. We did not downgrade
- b. Publication bias - Strongly suspected. Visual inspection of Funnel plots suggested asymmetry. Egger's regression test showed significant evidence of a small-study effect (p = 0.0062). Trim and fill analysis showed evidence of publication bias, indicating that 11 trials might be missing to left of mean for an adjusted SMD of -1.032 (-1.31, -0.76) increasing the effect size (random-effects model). We downgraded (-1) due to small study effect combined with potential RoB associated with blinding.
- c. Risk of bias - Not serious. There was low or unclear RoB for all items except sample size. There was a higher RoB associated blinding of participants than for placebo. This was not serious enough to downgrade by one level, so we combined concerns about RoB with concerns about publication bias.
- d. Inconsistency - Serious. Point estimates varied moderately; Generally, confidence intervals overlapped, although not all overlapped at least one point estimate. The direction of effect was consistent; The magnitude of statistical heterogeneity was high (e.g., I2 >60%). We downgraded (-1)
- e. Imprecision - Not serious. Pooled data sample size does meet pre-specified (e.g., 500 participants per trial arm). Magnitude of median study sample size was low (<100 participants); Number of included studies was high (>10 studies); Overall effect estimate confidence intervals showing the possibility of an effect above threshold. We did not downgrade but Egger's test noted a small study effect which was accounted for under Publication Bias

**TENS versus Other Treatment**

We did not GRADE.



## High Frequency versus Low Frequency TENS

### High versus low frequency TENS for pain intensity at last during or first post intervention measurement point

| Certainty assessment             |                          |                          |                          |                      |                   |                               | Summary of findings     |                          |                          |                              |                                                   |
|----------------------------------|--------------------------|--------------------------|--------------------------|----------------------|-------------------|-------------------------------|-------------------------|--------------------------|--------------------------|------------------------------|---------------------------------------------------|
| Participants (studies) Follow-up | Risk of bias             | Inconsistency            | Indirectness             | Imprecision          | Publication bias  | Overall certainty of evidence | Study event rates (%)   |                          | Relative effect (95% CI) | Anticipated absolute effects |                                                   |
|                                  |                          |                          |                          |                      |                   |                               | With Low Frequency TENS | With High Frequency TENS |                          | Risk with Low Frequency TENS | Risk difference with High Frequency TENS          |
| 468 (13 RCTs)                    | not serious <sup>a</sup> | not serious <sup>b</sup> | not serious <sup>c</sup> | serious <sup>d</sup> | none <sup>e</sup> | ⊕⊕⊕○ Moderate                 | 233                     | 235                      | -                        | -                            | SMD <b>0.19 lower</b> (0.43 lower to 0.06 higher) |

CI: confidence interval; RR: risk ratio; SMD: standardised mean difference

### Explanations

- Not serious. Low or unclear RoB except for sample size which was accounted for in imprecision.
- Not serious. Point estimates varied moderately; Generally, confidence intervals overlapped. The direction of effect was consistent; The magnitude of statistical heterogeneity was low (e.g.,  $I^2 < 40\%$ ).
- Not serious. The populations and interventions in included studies were highly applicable. The outcome was directly measured and in a sufficient timeframe. The conclusions were based on direct comparisons.
- Serious. Pooled data sample size does NOT meet pre-specified threshold (e.g., 500 participants per trial arm). Magnitude of median study sample size was low (<100 participants); Number of included studies was high (>10 studies); Overall effect estimate confidence intervals showed the possibility of no difference in effect. We downgraded (-1).
- Undetected. Visual inspection of Funnel plots suggested symmetry. Egger's regression test showed no significant evidence of a small-study effect ( $p = 0.8871$ ). Trim and fill analysis showed no evidence of publication bias.

### Adverse events

#### TENS compared with comparator for adverse events irrespective of severity

| Certainty assessment             |                           |                          |                           |                      |                                                  |                               | Summary of findings   |               |                               |                              |                                                      |
|----------------------------------|---------------------------|--------------------------|---------------------------|----------------------|--------------------------------------------------|-------------------------------|-----------------------|---------------|-------------------------------|------------------------------|------------------------------------------------------|
| Participants (studies) Follow-up | Risk of bias              | Inconsistency            | Indirectness              | Imprecision          | Publication bias                                 | Overall certainty of evidence | Study event rates (%) |               | Relative effect (95% CI)      | Anticipated absolute effects |                                                      |
|                                  |                           |                          |                           |                      |                                                  |                               | With Comparator       | With TENS     |                               | Risk with Comparator         | Risk difference with TENS                            |
| 1587 (18 RCTs)                   | very serious <sup>a</sup> | not serious <sup>b</sup> | very serious <sup>c</sup> | serious <sup>d</sup> | publication bias strongly suspected <sup>e</sup> | ⊕○○○ Very low <sup>d</sup>    | 95/782 (12.1%)        | 63/805 (7.8%) | RR <b>0.73</b> (0.36 to 1.48) | 121 per 1,000                | <b>33 fewer per 1,000</b> (from 78 fewer to 58 more) |

CI: confidence interval; RR: risk ratio

### Explanations

- Very serious. Adverse events were generally capture by spontaneous observation rather than through formal study design. We downgraded by two levels (-2).
- Not serious. Overall, there is consistency in the direction of results with some inconsistency in the estimates of the treatment effect.
- Very serious. Most trials did not pre-specify formal measurement of adverse events. The populations and interventions in included studies were highly applicable. The outcome was not directly measured, nor measured in a sufficient timeframe. The conclusions were often based on direct comparisons of spontaneous reports. We downgraded by two levels (-2).
- Serious. The event rate and trial sample sizes were very low. The optimal information size criterion for benefit was met (i.e.,  $\geq 500$  participants per trial arm) but this needs to be substantially larger for harm. We downgraded by two levels (-2).
- Strongly suspected. Visual inspection of Funnel plots suggested asymmetry and publication bias.

## SECTION 5 – Supplementary Detail to Support Conclusions

### **Overall completeness and applicability of evidence**

Our analysis supports treatment effects during and immediately post TENS. We did not attempt to analyse long-term follow-up following a course of treatment at this stage of the project. We are yet to conduct some pre-specified analyses on secondary outcomes including condition-specific pain-related outcomes (e.g., WOMAC, FIQ), health-related quality of life, including activities of daily living and fatigue, using any validated tool (e.g., Patient Global Impression of Change (PGIC), Short Form Health Survey (SF-36), EuroQol instruments) and participant-reported treatment satisfaction.

### ***Predominance of in-clinic RCTs***

There was a predominance of RCTs undertaken in hospital settings with short term outcomes such as post-operative pain and procedural pain, with fewer studies on chronic pain monitoring long term outcome from a long-term course of treatment. Methodological aspects of the study are logistically easier to manage and control in hospital settings than home trials whereby participants are using TENS to self-manage pain. Consequently, these RCTs tended to be judged as having lower risk of bias.

### ***Paucity of long-term follow-up***

There was a scarcity of trials with long-term follow-up of say 6 months after treatment had ceased. Interpreting the findings of these types of trials needs careful consideration. The effects of TENS are maximal during or immediately after stimulation so a significant gap between the end of a course of TENS treatment and follow-up measurements may bias towards observing no treatment effect. Trials with a significant gap between the end of a course of TENS treatment and follow-up may detect resolution of pain and/or behaviour changes such as reducing fear-avoidance of movement pain resulting in increased physical activity that may have been catalysed by a course of TENS treatment or by a wide range of other factors.

### ***Paucity of RCTs on prevalent chronic pain conditions***

There were too few trials to make confident judgements about treatment effects associated with neuropathic pain, and common types of chronic musculoskeletal pain such as non-specific low back and/or neck pain and osteoarthritis. Despite our review providing evidence that differences in TENS effects between specific conditions is minimal, we feel that a large scale long-term multi-centre trial for these common conditions would still be valuable. This is because differences in the context and practicalities of using TENS between specific conditions and populations of patients (e.g., elderly, cognitively challenged) that may influence whether TENS is indicated in clinical practice. It will also provide guideline panels with more confidence on which to make decisions about specific conditions.

### ***Follow-up analyses emerging from this review are:***

- The effect of TENS on analgesic consumption based on the studies included in this review.
- The effect of TENS versus 'TENS-like' devices that were excluded from this review (e.g., transcutaneous electrical acupoint stimulation, interferential currents, etc.). There are some systematic reviews that have recently undertaken similar analyses [41,132,133].

## Plausibility of Findings

### *Physiological Plausibility*

Our findings are physiological plausible. There is long-standing evidence that TENS acts physiologically to neuromodulate central nociceptive transmission irrespective of pathophysiology or diagnosis by selectively activating low threshold cutaneous primary afferents which reduces noxious evoked activity in central nociceptive transmission cells in both normal and sensitised states (see [7,134] for reviews). Therefore, TENS is used for symptomatic relief of pain rather than treatment (cure) of pathology in clinical practice.

### *Clinical Plausibility*

Our findings are consistent with expert opinion and clinical experience spanning more than 50 years, that TENS provides symptomatic relief of pain in a manner similar to ‘soothing pain’ by rubbing, warming or cooling the skin i.e., a therapeutic neuromodulation.

Our findings agree with expert opinion and clinical guidelines that TENS is probably safe and that adverse events are generally mild and restricted to minor skin reactions such as erythema and itchiness at the site of electrodes [6,134-136].

Our findings that pain characteristics do not moderate the effect of TENS agree with research that has found no relationships between TENS outcome and type of pain [103] and that physiological action is via neuromodulation rather than curative (i.e., not dependent on pathology [137,138]).

Our findings that high or low frequency stimulation does not moderate the effect of strong but comfortable TENS is consistent with current clinical practice whereby patients are advised to tailor the electrical output characteristics of the device to maximise comfort accompanying a strong non-painful TENS sensation on a moment-to-moment basis if necessary.

There were few trials and participants to make confident judgements about treatment effects associated with neuropathic pain, and common musculoskeletal pains such as chronic non-specific low back and/or neck pain and osteoarthritis. This review provides evidence that suggests that there are minimal differences in treatment effects between specific conditions. There may, however, be differences in the context and practicalities of using TENS between specific conditions and populations of patients (e.g., elderly, cognitively challenged) that will influence whether TENS is indicated in clinical practice. For TENS we posit that context of pain, rather than pathology is more likely to predict outcome.

### **Agreements and disagreements with other studies or reviews**

As part of this review, we identified and characterised 145 previously published systematic reviews (32 Cochrane reviews) on effect of TENS on pain-related outcomes.

Our descriptive analysis found that statements of conclusion in previous systematic reviews tended toward inconclusive (70/145) or TENS being efficacious (51/145) for acute or chronic pain. Despite being comprehensive and robust in methodological approach, Cochrane reviews consistently report that there are insufficient trials and participants to undertake meta-analyses of pooled data on specific pain conditions.

The recent overview of Cochrane reviews on TENS for chronic pain [139,140] and neuropathic pain [139,140] did not pool data, and were inconclusive. In our review we have argued against using a classical pathology-based categorisation of pain when appraising TENS at a gross level. Our subgroup analyses for common pain conditions such as labour pain, low back pain and osteoarthritis too few

1  
2  
3 trials and participants to estimate treatment effects with certainty. This is consistent with previous  
4 reviews.  
5

### 6 ***Inconsistency in clinical guidelines***

7 At present, TENS is recommended TENS as an adjunct to core treatment for osteoarthritis,  
8 rheumatoid arthritis [135,141], but not for non-specific chronic low back pain [142] and intrapartum  
9 care (labour pain) [143].  
10

11  
12 The inconsistency in National Institute for Health and Care Excellence guidelines has been due in  
13 part to insufficient data to make recommendations for specific pain conditions. We found that the  
14 magnitude of effect between different types of pain is not clinically relevant enabling data pooling  
15 from any type of pain. Our review has done this, and our findings should be considered in the  
16 development of future clinical guidelines, especially those that do not recommend TENS for specific  
17 pain conditions based on insufficient high quality RCTs on specific types of pain  
18  
19

20 The NICE draft guideline for chronic pain [144] does not recommend TENS for chronic primary pain  
21 based on an analysis of two RCTs. In contrast, we analysed data from 20 trials based on the ICD-11  
22 coding, with a statistically significant overall effect in favour of TENS compared with placebo (SMD =  
23 -0.66 [-1.20, -0.29],  $P < 0.0004$ ).  
24  
25

### 26 **Cost-benefit**

27 Our review did not include a cost-benefit analysis, funders should be aware that previous analyses  
28 provide evidence that TENS equipment, running costs and follow-up clinical support is inexpensive  
29 and can reduce annual costs for chronic pain [145], chronic low back pain without neurological  
30 involvement [146,147] and osteoarthritis of the knee [148].  
31  
32  
33

### 34 **Summary of Conclusions**

35 TENS produces clinically important reductions in the intensity of acute or chronic pain during and  
36 immediately after treatment with minimal risk of adverse events. This is based on a review of 381  
37 RCTs and 24532 participants at entry and various meta-analyses.  
38  
39

- 40 • There is moderate-certainty evidence of treatment effects in favour of TENS when compared  
41 with placebo based on data from 91 RCTs (92 samples, 4841 participants) with standardised  
42 mean difference [95% CI] for pain intensity of -0.96 [-1.14, -0.78]. This surpassed our threshold  
43 of magnitude for an important change in pain intensity in-line with IMMPECT criteria [15].
- 44 • There is low-certainty evidence of treatment effects in favour of TENS when compared with no  
45 treatment (waiting list) controls.
- 46 • There is low-certainty evidence of treatment effects in favour of TENS compared with  
47 treatments are considered by trial authors to be used fully or partly as standard of care (61 RCTs  
48 (61 samples, 3155 participants) with the standardised mean difference of -0.72 [-0.95, -0.50] in  
49 favour of TENS.
- 50 • There is moderate-certainty evidence of no difference in pain intensity between high and low  
51 frequency TENS.
- 52 • There is evidence from 381 RCTs that adverse events from TENS are minor and infrequent and  
53 not different from placebo, although the estimate of risk ratio had very-low certainty.  
54  
55

56 We have been judicious in our interpretation of our findings. We are confident in these conclusions  
57 because our findings are physiologically plausible and consistent with clinical expertise.  
58  
59

### 60 **Implications for practice**

- TENS can produce clinically important reductions in pain intensity for people experiencing acute or chronic pain, with minimal risk of harm.
- There are no clinically important differences in reductions in pain intensity generated by TENS for different pain conditions (diagnosis) or type of tissue associated with pain.
- TENS should be considered as a potential treatment option as an adjunct or as a stand-alone treatment for individuals experiencing any type of pain.

#### ***For people with pain***

- TENS is a safe pain-relieving treatment and can be used on its own or in combination with other treatments to reduce the intensity (soothe) acute or chronic pain.
- TENS produces a strong non painful TENS sensation within or close to the site of pain, so TENS needs to be administered frequently to maintain its pain-relieving effect.
- TENS equipment and running costs are relatively inexpensive and TENS can be self-administered either in hospital, clinic, or home settings.

#### ***For clinicians***

- This review of 381 RCTs provides evidence that clinically meaningful reductions in pain intensity occur during or immediately after delivering strong non painful TENS close to the site of pain.
- There is evidence that the characteristics of pain (e.g., duration or type of pain) do not modify the effects of TENS so any type of pain may respond.
- There is evidence that whether the electrical characteristics of currents are high frequency or low frequency do not modify the effects of TENS.
- Patients may need to use TENS frequently in order to maintain an analgesic effect.

#### ***For policymakers***

- The findings provide evidence in support of clinical guidelines that recommend TENS as an adjunct to core treatment [135,141].
- The findings provide evidence that the size of treatment effect between different types of pain is small, so efficacy is transferable to any type of pain. This should be considered in the development of clinical guidelines, especially those that do not recommend TENS for specific pain conditions based on insufficient high quality RCTs on specific types of pain, e.g., non-specific chronic low back pain [142] and intrapartum care (labour pain) [143].
- The findings are consistent with physiological plausibility and with clinical experience and expertise in the field.

#### ***For funders***

- This review did not include a cost-benefit analysis. Previously published analyses provide evidence that TENS equipment, running costs and follow-up clinical support is inexpensive and can reduce annual costs for chronic pain [145], chronic low back pain without neurological involvement [146,147] and osteoarthritis of the knee [149].
- TENS is safe and inexpensive and should be available as a treatment option for the management of pain.

#### **Implications for research**

This review should serve to

- Reduce production of systematic reviews on TENS for acute pain, chronic pain, or specific painful conditions unless there is novel angle and/or a dramatic increase in the volume of large multicentre randomised controlled trials.
- Justify a large scale multicentred RCT to assess TENS in a mixed population of chronic pain patients to add further confidence, or otherwise, to the precision of the findings reported in this review. We propose an Enriched Enrolment Randomised Withdrawal design to overcome many

1  
2  
3 methodological issues encountered in RCTs on TENS [150,151], *trial arm* sample sizes greater  
4 than 200 participants, and the use of methodological criteria for RCTs on TENS reported in [113].

- 5  
6 • Justify the need for pragmatic ecologically valid studies gathering real-world data about how  
7 best to integrate TENS into practice. Such findings can inform educational packages to train and  
8 support patients to self-administer TENS [152-154].  
9  
10  
11  
12  
13  
14  
15  
16  
17  
18  
19  
20  
21  
22  
23  
24  
25  
26  
27  
28  
29  
30  
31  
32  
33  
34  
35  
36  
37  
38  
39  
40  
41  
42  
43  
44  
45  
46  
47  
48  
49  
50  
51  
52  
53  
54  
55  
56  
57  
58  
59  
60

For peer review only



### References in Supplementary Appendix

1. Johnson, M.I.; Jones, G.; Paley, C.A.; Wittkopf, P.G. The clinical efficacy of transcutaneous electrical nerve stimulation (TENS) for acute and chronic pain: a protocol for a meta-analysis of randomised controlled trials (RCTs). *Bmj Open* **2019**, *9*, e029999, doi:10.1136/bmjopen-2019-029999.
2. Moher, D.; Shamseer, L.; Clarke, M.; Ghersi, D.; Liberati, A.; Petticrew, M.; Shekelle, P.; Stewart, L.A.; Group, P.-P. Preferred reporting items for systematic review and meta-analysis protocols (PRISMA-P) 2015 statement. *Syst Rev* **2015**, *4*, 1, doi:10.1186/2046-4053-4-1.
3. Higgins, J.; Thomas, J.; Chandler, J.; Cumpston, M.; Li, T.; Page, M.; VA, W. *Cochrane Handbook for Systematic Reviews of Interventions*, 2nd ed.; John Wiley & Sons: Chichester (UK), 2019.
4. Guyatt, G.H.; Oxman, A.D.; Vist, G.E.; Kunz, R.; Falck-Ytter, Y.; Alonso-Coello, P.; Schunemann, H.J.; Group, G.W. GRADE: an emerging consensus on rating quality of evidence and strength of recommendations. *BMJ* **2008**, *336*, 924-926, doi:10.1136/bmj.39489.470347.AD.
5. Carbonario, F.; Matsutani, L.; Yuan, S.; Marques, A. Effectiveness of high-frequency transcutaneous electrical nerve stimulation at tender points as adjuvant therapy for patients with fibromyalgia. *European Journal of Physical and Rehabilitation Medicine* **2013**, *49*, 197-204.
6. Johnson, M.I. *Transcutaneous electrical nerve stimulation (TENS). Research to support clinical practice*; Oxford University Press Oxford, UK, 2014.
7. Johnson, M.I. Transcutaneous electrical nerve stimulation. In *Electrophysical agents*, 13 ed.; Watson, T., Nussbaum, E.L., Eds. Elsevier: 2020; pp. 264-295.
8. Rakel, B.; Cooper, N.; Adams, H.J.; Messer, B.R.; Frey Law, L.A.; Dannen, D.R.; Miller, C.A.; Polehna, A.C.; Ruggle, R.C.; Vance, C.G., et al. A new transient sham TENS device allows for investigator blinding while delivering a true placebo treatment. *Journal of pain* **2010**, *11*, 230-238, doi:10.1016/j.jpain.2009.07.007.
9. Sluka, K.A.; Bjordal, J.M.; Marchand, S.; Rakel, B.A. What Makes Transcutaneous Electrical Nerve Stimulation Work? Making Sense of the Mixed Results in the Clinical Literature. *Physical Therapy* **2013**, *93(10)*: 1397-402.
10. Deyo, R.; Walsh, N.; Schoenfeld, L.; Ramamurthy, S. Can trials of physical treatments be blinded? The example of transcutaneous electrical nerve stimulation for chronic pain [see comments]. *Am J Phys Med Rehabil* **1990**, *69*, 6-10.
11. Higgins, J.; Altman, D.; Gøtzsche, P.; Jüni, P.; Moher, D.; Oxman, A.; Savović, J.; Schulz, K.; Weeks, L.; Sterne, J. The Cochrane Collaboration's tool for assessing risk of bias in randomised trials. *BMJ* **2011**, *343*, d5928.
12. Moore, A.R.; Eccleston, C.; Derry, S.; Wiffen, P.; Bell, R.F.; Straube, S.; McQuay, H.; Relief, A.W.G.o.t.I.S.I.G.o.S.R.i.P.; Cochrane Pain, P.; Supportive Care Systematic Review Group, E. "Evidence" in chronic pain--establishing best practice in the reporting of systematic reviews. *Pain* **2010**, *150*, 386-389, doi:10.1016/j.pain.2010.05.011.
13. Moore, R.A.; Derry, S.; Wiffen, P.J. Challenges in design and interpretation of chronic pain trials. *Br J Anaesth* **2013**, *111*, 38-45, doi:10.1093/bja/aet126.
14. Busse, J.W.; Bartlett, S.J.; Dougados, M.; Johnston, B.C.; Guyatt, G.H.; Kirwan, J.R.; Kwok, K.; Maxwell, L.J.; Moore, A.; Singh, J.A., et al. Optimal Strategies for Reporting Pain in Clinical Trials and Systematic Reviews: Recommendations from an OMERACT 12 Workshop. *J Rheumatol* **2015**, *10.3899/jrheum.141440*, doi:10.3899/jrheum.141440.
15. Dworkin, R.H.; Turk, D.C.; Wyrwich, K.W.; Beaton, D.; Cleeland, C.S.; Farrar, J.T.; Haythornthwaite, J.A.; Jensen, M.P.; Kerns, R.D.; Ader, D.N., et al. Interpreting the clinical

- importance of treatment outcomes in chronic pain clinical trials: IMMPACT recommendations. *J Pain* **2008**, *9*, 105-121.
16. Cohen, J. *Statistical Power Analysis for the Behavioral Sciences.*, 2 ed.; Earlbaum: Hillsdale, NJ, 1988.
  17. Peryer, G., Golder, S, Junqueira, D, Vohra, S, Loke, Y.K. Adverse effects. In *Cochrane Handbook for Systematic Reviews of Interventions version 6.0 (updated July 2019)*, Higgins JPT, T.J., Chandler J, Cumpston M, Li T, Page MJ, Welch VA, Ed. Cochrane, 2019. : 2019.
  18. Higgins, J.P.; Thompson, S.G.; Deeks, J.J.; Altman, D.G. Measuring inconsistency in meta-analyses. *BMJ* **2003**, *327*, 557-560, doi:10.1136/bmj.327.7414.557.
  19. Richardson, M., Garner, P., Donegan, S. Interpretation of subgroup analyses in systematic reviews: A tutorial. *Clinical Epidemiology and Global Health* **2019**, *7*, 192-198.
  20. Moore, R.A.; Moore, O.A.; Derry, S.; McQuay, H.J. Numbers needed to treat calculated from responder rates give a better indication of efficacy in osteoarthritis trials than mean pain scores. *Arthritis Res Ther* **2008**, *10*, R39, doi:10.1186/ar2394.
  21. Cherian, J.J.; Harrison, P.E.; Benjamin, S.A.; Bhave, A.; Harwin, S.F.; Mont, M.A. Do the Effects of Transcutaneous Electrical Nerve Stimulation on Knee Osteoarthritis Pain and Function Last? *J Knee Surg* **2016**, *29*, 497-501, doi:10.1055/s-0035-1566735.
  22. Cherian, J.J.; Kapadia, B.H.; Bhave, A.; McElroy, M.J.; Cherian, C.; Harwin, S.F.; Mont, M.A. Use of Transcutaneous Electrical Nerve Stimulation Device in Early Osteoarthritis of the Knee. *J Knee Surg* **2015**, *28*, 321-327, doi:10.1055/s-0034-1389160.
  23. Cherian, J.J.; Kapadia, B.H.; McElroy, M.J.; Johnson, A.J.; Bhave, A.; Harwin, S.F.; Mont, M.A. Knee Osteoarthritis: Does Transcutaneous Electrical Nerve Stimulation Work? *Orthopedics* **2016**, *39*, e180-186, doi:10.3928/01477447-20151222-02.
  24. Chesterton, L.; Van Der Windt, D.A.; Sim, J.; Lewis, M.; Mallen, C.D.; Mason, E.; Hay, E. Transcutaneous electrical nerve stimulation for the management of tennis elbow: A pragmatic randomized controlled trial. *Rheumatology* **2013**, *1*), i38.
  25. Lewis, M.; Chesterton, L.S.; Sim, J.; Mallen, C.D.; Hay, E.M.; van der Windt, D.A. An Economic Evaluation of TENS in Addition to Usual Primary Care Management for the Treatment of Tennis Elbow: Results from the TATE Randomized Controlled Trial. *PLoS One* **2015**, *10*, e0135460, doi:10.1371/journal.pone.0135460.
  26. Escortell-Mayor, E.; Riesgo-Fuertes, R.; Garrido-Elustondo, S.; Asunsolo-Del Barco, A.; Diaz-Pulido, B.; Blanco-Diaz, M.; Bejerano-Alvarez, E. Primary care randomized clinical trial: manual therapy effectiveness in comparison with TENS in patients with neck pain. *Manual therapy* **2011**, *16*, 66-73, doi:10.1016/j.math.2010.07.003.
  27. Escortell Mayor, E.; Lebrijo Perez, G.; Perez Martin, Y.; Asunsolo del Barco, A.; Riesgo Fuertes, R.; Saa Requejo, C. [Randomized clinical trial for primary care patients with neck pain: manual therapy versus electrical stimulation]. *Atencion primaria* **2008**, *40*, 337-343.
  28. Oosterhof, J.; De Boo, T.M.; Oostendorp, R.A.; Wilder-Smith, O.H.; Crul, B.J. Outcome of transcutaneous electrical nerve stimulation in chronic pain: short-term results of a double-blind, randomised, placebo-controlled trial. *The journal of headache and pain* **2006**, *7*, 196-205, doi:10.1007/s10194-006-0309-z.
  29. Oosterhof, J.; Samwel, H.J.; de Boo, T.M.; Wilder-Smith, O.H.; Oostendorp, R.A.; Crul, B.J. Predicting outcome of TENS in chronic pain: a prospective, randomized, placebo controlled trial. *Pain* **2008**, *136*, 11-20, doi:10.1016/j.pain.2007.06.009.
  30. Oosterhof, J.; Wilder-Smith, O.H.; de Boo, T.; Oostendorp, R.A.; Crul, B.J. The Long-Term Outcome of Transcutaneous Electrical Nerve Stimulation in the Treatment for Patients with Chronic Pain: A Randomized, Placebo-Controlled Trial. *Pain Pract* **2012**, *12*(7):513-22.
  31. Oosterhof, J.; Wilder-Smith, O.H.; Oostendorp, R.A.; Crul, B.J. Different mechanisms for the short-term effects of real versus sham transcutaneous electrical nerve stimulation (TENS) in patients with chronic pain: a pilot study. *J Pain Palliat Care Pharmacother* **2012**, *26*, 5-12, doi:10.3109/15360288.2011.650352.

- 1  
2  
3 32. Pietrosimone, B.G.; Saliba, S.A.; Hart, J.M.; Hertel, J.; Kerrigan, D.C.; Ingersoll, C.D. Effects of  
4 transcutaneous electrical nerve stimulation and therapeutic exercise on quadriceps  
5 activation in people with tibiofemoral osteoarthritis. *The Journal of orthopaedic and sports*  
6 *physical therapy* **2011**, *41*, 4-12, doi:10.2519/jospt.2011.3447.
- 7 33. Pietrosimone, B.G.; Saliba, S.A.; Hart, J.M.; Hertel, J.; Kerrigan, D.C.; Ingersoll, C.D. Effects of  
8 disinhibitory transcutaneous electrical nerve stimulation and therapeutic exercise on sagittal  
9 plane peak knee kinematics and kinetics in people with knee osteoarthritis during gait: a  
10 randomized controlled trial. *Clinical Rehabilitation* **2010**, *24*, 1091-1101,  
11 doi:10.1177/0269215510375903.
- 12 34. Chia, Y.; Arulkumaran, S.; Chua, S.; Ratnam, S. Effectiveness of transcutaneous electric nerve  
13 stimulator for pain relief in labour. *Asia Oceania J Obstet Gynaecol* **1990**, *16*, 145-151.
- 14 35. Kayman-Kose, S.; Arioz, D.T.; Toktas, H.; Koken, G.; Kanat-Pektas, M.; Kose, M.; Yilmazer, M.  
15 Transcutaneous electrical nerve stimulation (TENS) for pain control after vaginal delivery and  
16 cesarean section. *Journal of Maternal-Fetal & Neonatal Medicine* **2014**, *27*, 1572-1575,  
17 doi:10.3109/14767058.2013.870549.
- 18 36. Lin, M.L.; Luo, Y.J.; Hsu, Y.M.; Guo, C.H.; Lin, S.C.; Lin, K.Y.; Lin, S.H.; Chiu, H.W. Randomized  
19 controlled trial Comparing of Analgesic Effectiveness of TPRF and TENS in Clinical and  
20 Endocrinological Changes for Chronic Shoulder Pain; 4th International Symposium on  
21 Bioelectronics and Bioinformatics (ISBB) Oct 14-17, 2015, Tsinghua Univ, Beijing, PEOPLES R  
22 CHINA; pp. 23-26.
- 23 37. Lin, M.L.; Chiu, H.W.; Shih, Z.M.; Lee, P.Y.; Li, P.Z.; Guo, C.H.; Luo, Y.J.; Lin, S.C.; Lin, K.Y.; Hsu,  
24 Y.M. Two Transcutaneous Stimulation Techniques in Shoulder Pain: transcutaneous Pulsed  
25 Radiofrequency (TPRF) versus Transcutaneous Electrical Nerve Stimulation (TENS): a  
26 Comparative Pilot Study. *Pain Research & Management* **2019**, *2019*, 2823401,  
27 doi:10.1155/2019/2823401.
- 28 38. Johnson, M.; Martinson, M. Efficacy of electrical nerve stimulation for chronic  
29 musculoskeletal pain: a meta-analysis of randomized controlled trials. *Pain* **2007**, *130*, 157-  
30 165.
- 31 39. Sawant, A.; Dadurka, K.; Overend, T.; Kremenchutzky, M. Systematic review of efficacy of  
32 TENS for management of central pain in people with multiple sclerosis. *Mult Scler Relat*  
33 *Disord* **2015**, *4*, 219-227.
- 34 40. Kroeling, P.; Gross, A.; Graham, N.; Burnie, S.J.; Szeto, G.; Goldsmith, C.H.; Haines, T.; Forget,  
35 M. Electrotherapy for neck pain. *Cochrane Database Syst Rev* **2013**, *8*, CD004251,  
36 doi:10.1002/14651858.CD004251.pub5.
- 37 41. Zhu, J.; Xu, Q.; Zou, R.; Wu, W.; Wang, X.; Wang, Y.; Ji, F.; Zheng, Z.; Zheng, M. Distal  
38 acupoint stimulation versus peri-incisional stimulation for postoperative pain in open  
39 abdominal surgery: a systematic review and implications for clinical practice. *BMC*  
40 *complementary and alternative medicine* **2019**, *19*, 192, doi:10.1186/s12906-019-2583-8.
- 41 42. Zhou, J.; Dan, Y.; Yixian, Y.; Lyu, M.; Zhong, J.; Wang, Z.; Zhu, Y.; Liu, L. Efficacy of  
42 Transcutaneous Electronic Nerve Stimulation in Postoperative Analgesia After Pulmonary  
43 Surgery A Systematic Review and Meta-Analysis. *American Journal of Physical Medicine &*  
44 *Rehabilitation* **2020**, *99*, 241-249, doi:10.1097/PHM.0000000000001312.
- 45 43. Bjersa, K.; Andersson, T. High frequency TENS as a complement for pain relief in  
46 postoperative transition from epidural to general analgesia after pancreatic resection.  
47 *Complementary therapies in clinical practice* **2014**, *20*, 5-10, doi:10.1016/j.ctcp.2013.11.004.
- 48 44. Itoh, K.; Hirota, S.; Katsumi, Y.; Ochi, H.; Kitakoji, H. A pilot study on using acupuncture and  
49 transcutaneous electrical nerve stimulation (TENS) to treat knee osteoarthritis (OA). *Chin*  
50 *Med* **2008**, *3*, 2.
- 51  
52  
53  
54  
55  
56  
57  
58  
59  
60

- 1
  - 2
  - 3
  - 4
  - 5
  - 6
  - 7
  - 8
  - 9
  - 10
  - 11
  - 12
  - 13
  - 14
  - 15
  - 16
  - 17
  - 18
  - 19
  - 20
  - 21
  - 22
  - 23
  - 24
  - 25
  - 26
  - 27
  - 28
  - 29
  - 30
  - 31
  - 32
  - 33
  - 34
  - 35
  - 36
  - 37
  - 38
  - 39
  - 40
  - 41
  - 42
  - 43
  - 44
  - 45
  - 46
  - 47
  - 48
  - 49
  - 50
  - 51
  - 52
  - 53
  - 54
  - 55
  - 56
  - 57
  - 58
  - 59
  - 60
45. Itoh, K.; Itoh, S.; Katsumi, Y.; Kitakoji, H. A pilot study on using acupuncture and transcutaneous electrical nerve stimulation to treat chronic non-specific low back pain. *Complementary therapies in clinical practice* **2009**, *15*, 22-25.
46. Rutjes, A.W.; Nuesch, E.; Sterchi, R.; Kalichman, L.; Hendriks, E.; Osiri, M.; Brosseau, L.; Reichenbach, S.; Juni, P. Transcutaneous electrostimulation for osteoarthritis of the knee. *Cochrane Database Syst Rev* **2009**, CD002823.
47. Wu, L.C.; Weng, P.W.; Chen, C.H.; Huang, Y.Y.; Tsuang, Y.H.; Chiang, C.J. Literature Review and Meta-Analysis of Transcutaneous Electrical Nerve Stimulation in Treating Chronic Back Pain. *Reg Anesth Pain Med* **2018**, *43*, 425-433, doi:10.1097/AAP.0000000000000740.
48. Aydin, S.; Arioglu Aydin, C.; Batmaz, G.; Dansuk, R. Effect of vaginal electrical stimulation on female sexual functions: a randomized study. *J Sex Med* **2015**, *12*, 463-469, doi:10.1111/jsm.12788.
49. Murina, F.; Felice, R.; Di Francesco, S.; Oneda, S. Vaginal diazepam plus transcutaneous electrical nerve stimulation to treat vestibulodynia: A randomized controlled trial. *European Journal of Obstetrics, Gynecology, and Reproductive Biology* **2018**, *228*, 148-153, doi:10.1016/j.ejogrb.2018.06.026.
50. Murina, F.; Bianco, V.; Radici, G.; Felice, R.; Di Martino, M.; Nicolini, U. Transcutaneous electrical nerve stimulation to treat vestibulodynia: a randomised controlled trial. *Bjog* **2008**, *115*, 1165-1170.
51. Meehan, J.G.; Gowans, A.J.; Welbury, R.R. The use of patient-controlled transcutaneous electronic nerve stimulation (TENS) to decrease the discomfort of regional anaesthesia in dentistry: Randomised controlled clinical trial. *Journal of Dentistry* **1998**, *26*, 417-420, doi:10.1016/s0300-5712(97)00062-6.
52. Conn, I.G.; Marshall, A.H.; Yadav, S.N.; Daly, J.C.; Jaffer, M. Transcutaneous electrical nerve stimulation following appendectomy: the placebo effect. *Annals of the Royal College of Surgeons of England* **1986**, *68*, 191-192.
53. Quinton, D.N.; Sloan, J.P.; Theakstone, J. Transcutaneous electrical nerve stimulation in acute hand infections. *Journal of hand surgery* **1987**, *12*, 267-268.
54. VanderArk, G.D.; McGrath, K.A. Transcutaneous electrical stimulation in treatment of postoperative pain. *Am J Surg* **1975**, *130*, 338-340.
55. Wang, W.; George, S.; Wilimas, J. Transcutaneous electrical nerve stimulation treatment of sickle cell pain crises. *Acta Haematol* **1988**, *80*, 99-102.
56. Alm, W.; Gold, M.; Weil, L. Evaluation of transcutaneous electrical nerve stimulation (TENS) in podiatric surgery. *J Am Podiatry Assoc* **1979**, *69*, 537-542.
57. Hanfy, H.M.; El-Bigawy, A. Effects of transcutaneous electrical nerve stimulation versus acupuncture in the treatment of primary dysmenorrhea. *Bull. Fac. Phys. Ther. Cairo Univ.* **2004**, *9*, 2.
58. Revadkar, M.T.; Bhojwani, T.M. Comparison of the Effectiveness of Transcutaneous Electrical Nerve Stimulation (Tens) Vs. Interferential Therapy (Ift) for Relief of Pain in Primary Dysmenorrhea. *International Journal of Physiotherapy* **2019**, *6*, 263-267, doi:10.15621/ijphy/2019/v6i6/190223.
59. Borup, L.; Wurlitzer, W.; Hedegaard, M.; Kesmodel, U.S.; Hvidman, L. Acupuncture as pain relief during delivery: a randomized controlled trial. *Birth (Berkeley, Calif)* **2009**, *36*, 5-12.
60. Upton, G.A.; Tinley, P.; Al-Aubaidy, H.; Crawford, R. The influence of transcutaneous electrical nerve stimulation parameters on the level of pain perceived by participants with painful diabetic neuropathy: A crossover study. *Diabetes & Metabolic Syndrome* **2017**, *11*, 113-118, doi:10.1016/j.dsx.2016.08.016.
61. Warke, K.; Al-Smadi, J.; Baxter, G.D.; Walsh, D.M.; Lowe-Strong, A.S. A double blind, placebo controlled, randomised, clinical trial investigating the efficacy of transcutaneous electrical nerve stimulation for low back pain in a multiple sclerosis population. *Multiple Sclerosis* **2004**, *10*, S107-S107.



- 1  
2  
3  
4  
5  
6  
7  
8  
9  
10  
11  
12  
13  
14  
15  
16  
17  
18  
19  
20  
21  
22  
23  
24  
25  
26  
27  
28  
29  
30  
31  
32  
33  
34  
35  
36  
37  
38  
39  
40  
41  
42  
43  
44  
45  
46  
47  
48  
49  
50  
51  
52  
53  
54  
55  
56  
57  
58  
59  
60
62. Al-Smadi, J.; Warke, K.; Wilson, I.; Cramp, A.; Noble, G.; Walsh, D.; Lowe-Strong, A. A pilot investigation of the hypoalgesic effects of transcutaneous electrical nerve stimulation upon low back pain in people with multiple sclerosis. *Clinical Rehabilitation* **2003**, *17*, 742-749.
63. da Silva, T.F.G.; Suda, E.Y.; Marçulo, C.A.; Paes, F.H.S.; Pinheiro, G.T. Comparison of transcutaneous electrical nerve stimulation and hydrotherapy effects on pain, flexibility and quality of life in patients with fibromyalgia. *Fisioterapia e Pesquisa* **2008**, *15*, 118-124 117p.
64. de Oliveira Guimaraes, C.S.; Santos Tavares, F.C.; Santos, M.N.; Guimaraes, G.C.; Pacheco Olegario, J.G.; Rocha, L.P.; Reis, L.C.; Dos Reis, M.A.; da Cunha Castro, E.C.; Miranda Correa, R.R. Transcutaneous electrical nerve stimulation and placental vascularization in cases of uterine blood flow restriction. *Fetal Pediatr Pathol* **2013**, *32*, 88-96, doi:10.3109/15513815.2012.671648.
65. Chiu, T.T.; Hui-Chan, C.W.; Chein, G. A randomized clinical trial of TENS and exercise for patients with chronic neck pain. *Clinical Rehabilitation* **2005**, *19*, 850-860.
66. Neighbours, L.E.; Clelland, J.; Jackson, J.R.; Bergman, J.; Orr, J. Transcutaneous electrical nerve stimulation for pain relief in primary dysmenorrhea. *Clin J Pain* **1987**, *3*, 17-22.
67. Tsukayama, H.; Yamashita, H.; Amagai, H.; Tanno, Y. Randomised controlled trial comparing the effectiveness of electroacupuncture and TENS for low back pain: a preliminary study for a pragmatic trial. *Acupunct Med* **2002**, *20*, 175-180.
68. Yoshimizu, M.; Teo, A.R.; Ando, M.; Kiyohara, K.; Kawamura, T. Relief of chronic shoulder and neck pain by electro-acupuncture and transcutaneous electrical nervous stimulation: A randomized crossover trial. *Medical Acupuncture* **2012**, *24*, 97-103.
69. Yurtkuran, M.; Kocagil, T. TENS, electroacupuncture and ice massage: comparison of treatment for osteoarthritis of the knee. *Am J Acupunct* **1999**, *27*, 133-140.
70. Grimmer, K. A controlled double blind study comparing the effects of strong burst mode TENS and High Rate TENS on painful osteoarthritic knees. *Australian Journal of Physiotherapy* **1992**, *38*, 49-56.
71. Hsieh, R.L.; Lee, W.C. One-shot percutaneous electrical nerve stimulation vs. transcutaneous electrical nerve stimulation for low back pain: comparison of therapeutic effects. *Am J Phys Med Rehabil* **2002**, *81*, 838-843.
72. Bulut, M.; Özcan, A.; Çakan, T.; Mektas, M.; Çulha, C. The Comparison of Effectiveness of TENS and Placebo TENS in Peripheral Neuropathic Pain in Patients with Type II Diabetes Mellitus. *Turkiye Klinikleri Journal of Medical Sciences* **2011**, *31*, 913-918, doi:10.5336/medsci.2010-18141.
73. Tilak, M.; Isaac, S.A.; Fletcher, J.; Vasanthan, L.T.; Subbaiah, R.S.; Babu, A.; Bhide, R.; Tharion, G. Mirror Therapy and Transcutaneous Electrical Nerve Stimulation for Management of Phantom Limb Pain in Amputees - A Single Blinded Randomized Controlled Trial. *Physiotherapy Research International* **2016**, *21*, 109-115, doi:10.1002/pri.1626.
74. Jensen, J.E.; Conn, R.R.; Hazelrigg, G.; Hewett, J.E. The use of transcutaneous neural stimulation and isokinetic testing in arthroscopic knee surgery. *Am J Sports Med* **1985**, *13*, 27-33.
75. Nash, T.; Williams, J.; Machin, D. TENS:does the type of stimulus really matter? *The Pain Clinic* **1990**, *3*, 161-168.
76. Sherry, E.; Kitchener, P.; Smart, R. A prospective randomized controlled study of VAX-D and TENS for the treatment of chronic low back pain. *Neurol Res* **2001**, *23*, 780-784.
77. Hughes, S.; Dailey, P.; Partridge, C. Transcutaneous electrical nerve stimulation for labour analgesia. *Anesthesia and Analgesia* **1988**, *67*, S99.
78. Olsen, M.F.; Elden, H.; Janson, E.D.; Lilja, H.; Stener-Victorin, E. A comparison of high- versus low-intensity, high-frequency transcutaneous electric nerve stimulation for painful postpartum uterine contractions. *Acta Obstet Gynecol Scand* **2007**, *86*, 310-314.
79. Fagevik Olsen, M.; Bjorndahl, S.; Stahl, A.; Borjesson, S.; Sundemo, A.; Gutke, A. Effects of high-intensity high-frequency transcutaneous electric nerve stimulation in primary

- dysmenorrhea-a randomised cross-over pilot study. *European Journal of Physiotherapy*. **2019**.
80. Platon, B.; Andrell, P.; Raner, C.; Rudolph, M.; Dvoretzky, A.; Mannheimer, C. High-frequency, high-intensity transcutaneous electrical nerve stimulation as treatment of pain after surgical abortion. *Pain* **2010**, *148*, 114-119, doi:10.1016/j.pain.2009.10.023.
81. Platon, B.; Mannheimer, C.; Andrell, P. Effects of high-frequency, high-intensity transcutaneous electrical nerve stimulation versus intravenous opioids for pain relief after gynecologic laparoscopic surgery: a randomized controlled study. *Korean Journal of Anesthesiology* **2018**, *71*, 149-156, doi:10.4097/kjae.2018.71.2.149.
82. Sadala, A.Y.; Machado, A.F.P.; Liebano, R.E. Effects of transcutaneous electrical nerve stimulation on pain intensity during application of carboxytherapy in patients with cellulite: A randomized placebo-controlled trial. *Journal of cosmetic dermatology* **2018**, *17*, 1175-1181, doi:10.1111/jocd.12489.
83. Nash, T.P.; Williams, J.D.; Machin, D. TENS: Does the type of stimulus really matter? *Pain Clinic* **1990**, *3*, 161-168.
84. Dailey, D.L.; Rakel, B.A.; Vance, C.G.T.; Liebano, R.E.; Amrit, A.S.; Bush, H.M.; Lee, K.S.; Lee, J.E.; Sluka, K.A. Transcutaneous electrical nerve stimulation reduces pain, fatigue and hyperalgesia while restoring central inhibition in primary fibromyalgia. *Pain* **2013**, *154*, 2554-2562, doi:10.1016/j.pain.2013.07.043.
85. Rakel, B.A.; Zimmerman, M.B.; Geasland, K.; Embree, J.; Clark, C.R.; Noiseux, N.O.; Callaghan, J.J.; Herr, K.; Walsh, D.; Sluka, K.A. Transcutaneous electrical nerve stimulation for the control of pain during rehabilitation after total knee arthroplasty: A randomized, blinded, placebo-controlled trial. *Pain* **2014**, *155*, 2599-2611, doi:10.1016/j.pain.2014.09.025.
86. Tsen, L.C.; Thomas, J.; Segal, S.; Datta, S.; Bader, A.M. Transcutaneous electrical nerve stimulation does not augment epidural labor analgesia. *J Clin Anesth* **2001**, *13*, 571-575.
87. Amer-Cuenca, J.J.; Goicoechea, C.; Girona-Lopez, A.; Andreu-Plaza, J.L.; Palao-Roman, R.; Martinez-Santa, G.; Lison, J.F. Pain relief by applying transcutaneous electrical nerve stimulation (TENS) during unsedated colonoscopy: a randomized double-blind placebo-controlled trial. *Eur J Pain* **2011**, *15*, 29-35, doi:10.1016/j.ejpain.2010.05.006.
88. Atamaz, F.C.; Durmaz, B.; Baydar, M.; Demircioglu, O.Y.; Iliyapici, A.; Kuran, B.; Oncel, S.; Sendur, O.F. Comparison of the efficacy of transcutaneous electrical nerve stimulation, interferential currents, and shortwave diathermy in knee osteoarthritis: a double-blind, randomized, controlled, multicenter study. *Archives of Physical Medicine and Rehabilitation* **2012**, *93*, 748-756.
89. Dailey, D.L.; Vance, C.G.T.; Rakel, B.A.; Zimmerman, M.B.; Embree, J.; Merriwether, E.N.; Geasland, K.M.; Chimenti, R.; Williams, J.M.; Golchha, M., et al. Transcutaneous Electrical Nerve Stimulation Reduces Movement-Evoked Pain and Fatigue: A Randomized, Controlled Trial. *Arthritis & rheumatology (Hoboken, N.J.)* **2020**, *72*, 824-836, doi:10.1002/art.41170 [doi].
90. Baez-Suarez, A.; Martin-Castillo, E.; Garcia-Andujar, J.; Garcia-Hernandez, J.A.; Quintana-Montesdeoca, M.P.; Loro-Ferrer, J.F. Evaluation of different doses of transcutaneous nerve stimulation for pain relief during labour: a randomized controlled trial. *Trials* **2018**, *19*, 652-652, doi:10.1186/s13063-018-3036-2 [doi].
91. Palmer, S.; Domaille, M.; Cramp, F.; Walsh, N.; Pollock, J.; Kirwan, J.; Johnson, M.I. Transcutaneous electrical nerve stimulation as an adjunct to education and exercise for knee osteoarthritis: a randomized controlled trial. *Arthritis Care Res (Hoboken)* **2014**, *66*, 387-394, doi:10.1002/acr.22147.
92. Borup, L.; Wurlitzer, W.; Hedegaard, M.; Kesmodel, U.S.; Hvidman, L. Acupuncture as pain relief during delivery: a randomized controlled trial. *Birth (berkeley, calif.)* **2009**, *36*, 5-12, doi:10.1111/j.1523-536X.2008.00290.x.



- 1  
2  
3 93. Pietrosimone, B.; Luc-Harkey, B.A.; Harkey, M.S.; Davis-Wilson, H.C.; Pfeiffer, S.J.; Schwartz,  
4 T.A.; Nissman, D.; Padua, D.A.; Blackburn, J.T.; Spang, J.T. Using TENS to Enhance  
5 Therapeutic Exercise in Individuals with Knee Osteoarthritis. *Medicine and science in sports  
6 and exercise* **2020**, 10.1249/MSS.0000000000002353 [doi],  
7 doi:10.1249/MSS.0000000000002353 [doi].  
8  
9 94. Lison, J.F.; Amer-Cuenca, J.J.; Piquer-Marti, S.; Benavent-Caballer, V.; Bivia-Roig, G.; Marin-  
10 Buck, A. Transcutaneous Nerve Stimulation for Pain Relief During Office Hysteroscopy: A  
11 Randomized Controlled Trial. *Obstetrics and gynecology* **2017**, *129*, 363-370,  
12 doi:10.1097/aog.0000000000001842.  
13  
14 95. Thomas, I.L.; Tyle, V.; Webster, J.; Neilson, A. An evaluation of transcutaneous electrical  
15 nerve stimulation for pain relief in labour. *The Australian & New Zealand journal of  
16 obstetrics & gynaecology* **1988**, *28*, 182-189.  
17  
18 96. Dailey, D.L.; Vance, C.G.T.; Rakel, B.A.; Zimmerman, M.B.; Embree, J.; Merriwether, E.N.;  
19 Geasland, K.M.; Chimenti, R.; Williams, J.M.; Golchha, M., et al. Transcutaneous Electrical  
20 Nerve Stimulation Reduces Movement-Evoked Pain and Fatigue: A Randomized, Controlled  
21 Trial. *Arthritis Rheumatol* **2020**, *72*, 824-836, doi:10.1002/art.41170.  
22  
23 97. Moore, S.R.; Shurman, J. Combined neuromuscular electrical stimulation and transcutaneous  
24 electrical nerve stimulation for treatment of chronic back pain: a double-blind, repeated  
25 measures comparison. *Archives Of Physical Medicine And Rehabilitation* **1997**, *78*, 55-60.  
26  
27 98. Rakel, B.; Frantz, R. Effectiveness of transcutaneous electrical nerve stimulation on  
28 postoperative pain with movement. *J Pain* **2003**, *4*, 455-464.  
29  
30 99. Barbarisi, M.; Pace, M.C.; Passavanti, M.B.; Maisto, M.; Mazzariello, L.; Pota, V.; Aurilio, C.  
31 Pregabalin and transcutaneous electrical nerve stimulation for postherpetic neuralgia  
32 treatment. *Clinical Journal of Pain* **2010**, *26*, 567-572, doi:10.1097/AJP.0b013e3181dda1ac.  
33  
34 100. Luchesa, C.A.; Greca, F.H.; Guarita-Souza, L.C.; dos Santos, J.L.; Aquim, E.E. The role of  
35 electroanalgesia in patients undergoing coronary artery bypass surgery. *Rev Bras Cir  
36 Cardiovasc* **2009**, *24*, 391-396.  
37  
38 101. Sbruzzi, G.; Silveira, S.A.; Silva, D.V.; Coronel, C.C.; Plentz, R.D.M. Transcutaneous electrical  
39 nerve stimulation after thoracic surgery: Systematic review and metaanalysis of randomized  
40 trials. *Brazilian Journal of Cardiovascular Surgery* **2012**, *27*, 75-87.  
41  
42 102. Treede, R.D.; Rief, W.; Barke, A.; Aziz, Q.; Bennett, M.I.; Benoliel, R.; Cohen, M.; Evers, S.;  
43 Finnerup, N.B.; First, M.B., et al. Chronic pain as a symptom or a disease: the IASP  
44 Classification of Chronic Pain for the International Classification of Diseases (ICD-11). *Pain*  
45 **2019**, *160*, 19-27, doi:10.1097/j.pain.0000000000001384.  
46  
47 103. Johnson, M.I.; Ashton, C.H.; Thompson, J.W. An in-depth study of long-term users of  
48 transcutaneous electrical nerve stimulation (TENS). Implications for clinical use of TENS. *Pain*  
49 **1991**, *44*, 221-229.  
50  
51 104. Cheing, G.L.Y.; Hui-Chan, C.W.Y. Transcutaneous electrical nerve stimulation: Nonparallel  
52 antinociceptive effects on chronic clinical pain and acute experimental pain. *Archives of  
53 Physical Medicine and Rehabilitation* **1999**, *80*, 305-312.  
54  
55 105. Eklom, A.; Hansson, P. Thermal sensitivity is not changed by acute pain or afferent  
56 stimulation. *J Neurol Neurosurg Psychiatry* **1987**, *50*, 1216-1220.  
57  
58 106. Hansson, P.; Eklom, A. Transcutaneous electrical nerve stimulation (TENS) as compared to  
59 placebo TENS for the relief of acute oro-facial pain. *Pain* **1983**, *15*, 157-165.  
60  
107. Lee, J.E.; Anderson, C.M.; Perkhounkova, Y.; Sleuwenhoek, B.M.; Louison, R.R.  
Transcutaneous Electrical Nerve Stimulation Reduces Resting Pain in Head and Neck Cancer  
Patients: a Randomized and Placebo-Controlled Double-Blind Pilot Study. *Cancer nursing*  
**2019**, *42*, 218-228, doi:10.1097/NCC.0000000000000594.  
108. Dailey, D.L.; Rakel, B.A.; Vance, C.G.; Liebano, R.E.; Amrit, A.S.; Bush, H.M.; Lee, K.S.; Lee, J.E.;  
Sluka, K.A. Transcutaneous electrical nerve stimulation reduces pain, fatigue and

- 1  
2  
3 hyperalgesia while restoring central inhibition in primary fibromyalgia. *Pain* **2013**, *154*, 2554-  
4 2562.
- 5 109. Dawood, M.Y.; Ramos, J. Transcutaneous electrical nerve stimulation (TENS) for the  
6 treatment of primary dysmenorrhea: a randomized crossover comparison with placebo TENS  
7 and ibuprofen. *Obstetrics and gynecology* **1990**, *75*, 656-660.
- 8 110. Ghoname, E.A.; Craig, W.F.; White, P.F.; Ahmed, H.E.; Hamza, M.A.; Henderson, B.N.; Gajraj,  
9 N.M.; Huber, P.J.; Gatchel, R.J. Percutaneous electrical nerve stimulation for low back pain: a  
10 randomized crossover study. *Jama* **1999**, *281*, 818-823.
- 11 111. Lewis, B.; Lewis, D.; Cumming, G. The comparative analgesic efficacy of transcutaneous  
12 electrical nerve stimulation and a non-steroidal anti-inflammatory drug for painful  
13 osteoarthritis. *Br J Rheumatol* **1994**, *33*, 455-460.
- 14 112. Milsom, I.; Hedner, N.; Mannheimer, C. A comparative study of the effect of high-intensity  
15 transcutaneous nerve stimulation and oral naproxen on intrauterine pressure and menstrual  
16 pain in patients with primary dysmenorrhea. *Am J Obstet Gynecol* **1994**, *170*, 123-129.
- 17 113. Bennett, M.I.; Hughes, N.; Johnson, M.I. Methodological quality in randomised controlled  
18 trials of transcutaneous electric nerve stimulation for pain: low fidelity may explain negative  
19 findings. *Pain* **2011**, *152*, 1226-1232.
- 20 114. Bjordal, J.M.; Johnson, M.I.; Ljunggreen, A.E. Transcutaneous electrical nerve stimulation  
21 (TENS) can reduce postoperative analgesic consumption. A meta-analysis with assessment of  
22 optimal treatment parameters for postoperative pain. *Eur J Pain* **2003**, *7*, 181-188.
- 23 115. Ghoname, E.S.A.; White, P.F.; Ahmed, H.E.; Hamza, M.A.; Craig, W.F.; Noe, C.E. Percutaneous  
24 electrical nerve stimulation: an alternative to TENS in the management of sciatica. *Pain*  
25 **1999**, *83*, 193-199.
- 26 116. Ozkul, C.; Kilinc, M.; Yildirim, S.A.; Topcuoglu, E.Y.; Akyuz, M. Effects of visual illusion and  
27 transcutaneous electrical nerve stimulation on neuropathic pain in patients with spinal cord  
28 injury: A randomised controlled cross-over trial. *Journal of back and musculoskeletal*  
29 *rehabilitation* **2015**, *28*, 709-719, doi:10.3233/bmr-140573.
- 30 117. Alvarez-Arenal, A.; Junquera, L.M.; Fernandez, J.P.; Gonzalez, I.; Olay, S. Effect of occlusal  
31 splint and transcutaneous electric nerve stimulation on the signs and symptoms of  
32 temporomandibular disorders in patients with bruxism. *J Oral Rehabil* **2002**, *29*, 858-863.
- 33 118. Arvidsson, I.; Eriksson, E. Postoperative TENS pain relief after knee surgery: objective  
34 evaluation. *Orthopedics* **1986**, *9*, 1346-1351.
- 35 119. Gerson, G.R.; Jones, R.B.; Luscombe, D.K. Studies on the concomitant use of carbamazepine  
36 and clomipramine for the relief of post-herpetic neuralgia. *Postgraduate medical journal*  
37 **1977**, *53 Suppl 4*, 104-109.
- 38 120. Ghoname, E.S.; Craig, W.F.; White, P.F.; Ahmed, H.E.; Hamza, M.A.; Gajraj, N.M.; Vakharia,  
39 A.S.; Noe, C.E. The effect of stimulus frequency on the analgesic response to percutaneous  
40 electrical nerve stimulation in patients with chronic low back pain. *Anesthesia and Analgesia*  
41 **1999**, *88*, 841-846.
- 42 121. Lofgren, M.; Norrbrink, C. Pain relief in women with fibromyalgia: a cross-over study of  
43 superficial warmth stimulation and transcutaneous electrical nerve stimulation. *J Rehabil*  
44 *Med* **2009**, *41*, 557-562.
- 45 122. Lundeberg, T. A comparative study of the pain alleviating effect of vibratory stimulation,  
46 transcutaneous electrical nerve stimulation, electroacupuncture and placebo. *Am J Chin Med*  
47 **1984**, *12*, 72-79.
- 48 123. Robb, K.; Newham, D.; Williams, J. Transcutaneous Electrical Nerve Stimulation vs.  
49 Transcutaneous Spinal Electroanalgesia for Chronic Pain Associated with Breast Cancer  
50 Treatments. *Journal of Pain and Symptom Management* **2007**, *33*, 410-419.
- 51 124. Warke, K.; Al-Smadi, J.; Baxter, D.; Walsh, D.; Lowe-Strong, A. Efficacy of transcutaneous  
52 electrical nerve stimulation (tens) for chronic low-back pain in a multiple sclerosis  
53  
54  
55  
56  
57  
58  
59  
60

- 1  
2  
3 population: a randomized, placebo-controlled clinical trial. *Clinical Journal of Pain* **2006**, *22*,  
4 812-819.
- 5 125. Seo, H.G.; Bang, M.S.; Chung, S.G.; Jung, S.H.; Lee, S.-U. Effect of Electrical Stimulation on  
6 Botulinum Toxin A Therapy in Patients With Chronic Myofascial Pain Syndrome: A 16-Week  
7 Randomized Double-Blinded Study. *Archives of Physical Medicine & Rehabilitation* **2013**, *94*,  
8 412-418.
- 9 126. Vance, C.G.; Dailey, D.L.; Rakel, B.A.; Sluka, K.A. Using TENS for pain control: the state of the  
10 evidence. *Pain Manag* **2014**, *4*, 197-209, doi:10.2217/pmt.14.13.
- 11 127. Rowbotham, M.C.; Gilron, I.; Glazer, C.; Rice, A.S.; Smith, B.H.; Stewart, W.F.; Wasan, A.D.  
12 Can pragmatic trials help us better understand chronic pain and improve treatment? *Pain*  
13 **2013**, *154*, 643-646, doi:10.1016/j.pain.2013.02.034.
- 14 128. Moore, S.; Shurman, J. Combined neuromuscular electrical stimulation and transcutaneous  
15 electrical nerve stimulation for treatment of chronic back pain: a double-blind, repeated  
16 measures comparison. *Arch Phys Med Rehabil* **1997**, *78*, 55-60.
- 17 129. Grovle, L.; Hasvik, E.; Haugen, A.J. Rescue and concomitant analgesics in placebo-controlled  
18 trials of pharmacotherapy for neuropathic pain and low back pain. *Pain* **2020**, *161*, 3-10,  
19 doi:10.1097/j.pain.0000000000001690.
- 20 130. Fary, R.E.; Briffa, N.K. Monophasic electrical stimulation produces high rates of adverse skin  
21 reactions in healthy subjects. *Physiother Theory Pract* **2011**, *27*, 246-251,  
22 doi:10.3109/09593985.2010.487926.
- 23 131. Meader, N.; King, K.; Llewellyn, A.; Norman, G.; Brown, J.; Rodgers, M.; Moe-Byrne, T.;  
24 Higgins, J.P.; Sowden, A.; Stewart, G. A checklist designed to aid consistency and  
25 reproducibility of GRADE assessments: development and pilot validation. *Syst Rev* **2014**, *3*,  
26 82, doi:10.1186/2046-4053-3-82.
- 27 132. Almeida, C.C.; Maldaner da Silva, V.Z.M.; Cipriano Junior, G.; Liebano, R.E.; Quagliotti  
28 Durigan, J.L. Transcutaneous electrical nerve stimulation and interferential current  
29 demonstrate similar effects in relieving acute and chronic pain: a systematic review with  
30 meta-analysis [with consumer summary]. *Brazilian Journal of Physical Therapy* **2018**, *22*,  
31 347-354.
- 32 133. Page, M.J.; Green, S.; Mrocki, M.A.; Surace, S.J.; Deitch, J.; McBain, B.; Lyttle, N.; Buchbinder,  
33 R. Electrotherapy modalities for rotator cuff disease. *Cochrane Database Syst Rev* **2016**,  
34 10.1002/14651858.CD012225, CD012225, doi:10.1002/14651858.CD012225.
- 35 134. Sluka, K.; Walsh, D. Chapter 8: Transcutaneous Electrical Nerve Stimulation and  
36 Interferential Therapy In *Mechanisms and Management of Pain for the Physical Therapist*,  
37 Second ed.; KA, S., Ed. IASP Press: Philadelphia, USA, 2016; pp. 203-224.
- 38 135. National Institute for Health and Care Excellence. *Osteoarthritis: care and management*.  
39 *NICE guidelines [CG177]* London, 2014; pp 1-37.
- 40 136. Houghton, P.; Nussbaum, E.; Hoens, A. Electrophysical agents. Contraindications and  
41 Precautions: An Evidence-Based Approach to Clinical Decision Making in Physical Therapy.  
42 *Physiotherapy Canada* **2010**, *62*, 5-80.
- 43 137. DeSantana, J.M.; Walsh, D.M.; Vance, C.; Rakel, B.A.; Sluka, K.A. Effectiveness of  
44 transcutaneous electrical nerve stimulation for treatment of hyperalgesia and pain. *Current*  
45 *rheumatology reports* **2008**, *10*, 492-499.
- 46 138. Johnson, M.I.; Bjordal, J.M. Transcutaneous electrical nerve stimulation for the management  
47 of painful conditions: focus on neuropathic pain. *Expert Rev Neurother* **2011**, *11*, 735-753,  
48 doi:10.1586/ern.11.48.
- 49 139. Gibson, W.; Wand, B.M.; Meads, C.; Catley, M.J.; O'Connell, N.E. Transcutaneous electrical  
50 nerve stimulation (TENS) for chronic pain - an overview of Cochrane Reviews. *Cochrane*  
51 *Database Syst Rev* **2019**, *2*, CD011890, doi:10.1002/14651858.CD011890.pub2.
- 52  
53  
54  
55  
56  
57  
58  
59  
60

- 1  
2  
3  
4  
5  
6  
7  
8  
9  
10  
11  
12  
13  
14  
15  
16  
17  
18  
19  
20  
21  
22  
23  
24  
25  
26  
27  
28  
29  
30  
31  
32  
33  
34  
35  
36  
37  
38  
39  
40  
41  
42  
43  
44  
45  
46  
47  
48  
49  
50  
51  
52  
53  
54  
55  
56  
57  
58  
59  
60
140. Gibson, W.; Wand, B.M.; O'Connell, N.E. Transcutaneous electrical nerve stimulation (TENS) for neuropathic pain in adults. *Cochrane Database Syst Rev* **2017**, *9*, CD011976, doi:10.1002/14651858.CD011976.pub2.
141. National Institute for Health and Clinical Excellence. *NICE clinical guideline 79 Rheumatoid arthritis: The management of rheumatoid arthritis in adults*; London, 2009; pp 1-35.
142. National Institute for Health and Care Excellence, N. Low back pain and sciatica in over 16s: assessment and management. Clinical guideline [NG59]. National Institute for Health and Care Excellence (NICE): 2016; pp 1-18.
143. National Institute for Health and Clinical Excellence. *NICE clinical guideline 55 Intrapartum care: care of healthy women and their babies during childbirth*; London, 2007; pp 1-65.
144. National Institute for Health and Care Excellence (NICE). Chronic Pain (Primary and Secondary) in over 16s: Assessment of all Chronic Pain and Management of Chronic Primary Pain (NG193). National Institute for Health and Care Excellence (NICE): London, UK, 2021; pp 1–36.
145. Chabal, C.; Fishbain, D.A.; Weaver, M.; Heine, L.W. Long-term transcutaneous electrical nerve stimulation (TENS) use: impact on medication utilization and physical therapy costs. *Clinical Journal of Pain* **1998**, *14*, 66-73.
146. Pivec, R.; Stokes, M.; Chitnis, A.S.; Paulino, C.B.; Harwin, S.F.; Mont, M.A. Clinical and economic impact of TENS in patients with chronic low back pain: analysis of a nationwide database. *Orthopedics* **2013**, *36*, 922-928.
147. Pivec, R.; Minshall, M.E.; Mistry, J.B.; Chughtai, M.; Elmallah, R.K.; Mont, M.A. Decreased Opioid Utilization and Cost at One Year in Chronic Low Back Pain Patients Treated with Transcutaneous Electric Nerve Stimulation (TENS). *Surg Technol Int* **2015**, *27*, 268-274.
148. Woods, B.; Manca, A.; Weatherly, H.; Saramago, P.; Sideris, E.; Giannopoulou, C.; Rice, S.; Corbett, M.; Vickers, A.; Bowes, M., et al. Cost-effectiveness of adjunct non-pharmacological interventions for osteoarthritis of the knee. *PLoS One* **2017**, *12*, e0172749, doi:10.1371/journal.pone.0172749.
149. Ahn, H.; Woods, A.J.; Kunik, M.E.; Bhattacharjee, A.; Chen, Z.; Choi, E.; Fillingim, R.B. Efficacy of transcranial direct current stimulation over primary motor cortex (anode) and contralateral supraorbital area (cathode) on clinical pain severity and mobility performance in persons with knee osteoarthritis: An experimenter- and participant-blinded, randomized, sham-controlled pilot clinical study. *Brain Stimul* **2017**, *10*, 902-909, doi:10.1016/j.brs.2017.05.007.
150. Johnson, M.I.; Claydon, L.S.; Herbison, G.P.; Jones, G.; Paley, C.A. Transcutaneous electrical nerve stimulation (TENS) for fibromyalgia in adults. *Cochrane Database Syst Rev* **2017**, *10*, CD012172, doi:10.1002/14651858.CD012172.pub2.
151. Johnson, M.I. Transcutaneous electrical nerve stimulation (TENS) as an adjunct for pain management in perioperative settings: a critical review. *Expert Rev Neurother* **2017**, *17*, 1013-1027, doi:10.1080/14737175.2017.1364158.
152. Gozani, S.; Kong, X. Real-word effectiveness of fixed-site highfrequency transcutaneous electrical nerve stimulation in chronic low back pain. *Postgraduate Medicine* **2018**, *130* (Supplement 1), 78-79.
153. Gozani, S.N.; Ferree, T.C.; Moynihan, M.; Kong, X. Impact of transcutaneous electrical nerve stimulation on sleep in chronic low back pain: a real-world retrospective cohort study. *Journal of Pain Research* **2019**, *12*, 743-752, doi:10.2147/JPR.S196129.
154. Gladwell, P.W.; Cramp, F.; Palmer, S. Matching the perceived benefits of Transcutaneous Electrical Nerve Stimulation (TENS) for chronic musculoskeletal pain against Patient Reported Outcome Measures using the International Classification of Functioning, Disability and Health (ICF). *Physiotherapy* **2020**, *106*, 128-135, doi:10.1016/j.physio.2019.01.017.

08\_OL-TABLE1\_IncludedStudies

## ONLINE TABLE 1

## Summary Characteristics of included RCTs

| Reference                                | Design | Type | Condition                           | Sample size (women) | Primary TENS comparison                             | Comparison interventions                                                                                | TENS regimen                                         | Primary Outcome                                                      | Secondary Outcome                                           |
|------------------------------------------|--------|------|-------------------------------------|---------------------|-----------------------------------------------------|---------------------------------------------------------------------------------------------------------|------------------------------------------------------|----------------------------------------------------------------------|-------------------------------------------------------------|
| Abbasi et al., 2019 <sup>1</sup>         | P      | Pr   | Procedural - Throughout Pleurodesis | 66 (NR)             | TENS (HF) + Diclofenac = 33                         | Placebo TENS (0mA) + diclofenac = 33                                                                    | Fixed<br>1 x 50 mins during procedure                | Pain intensity (VAS)                                                 | Analgesic consumption<br>Blood pressure, heart rate         |
| Abelson et al., 1983 <sup>2</sup>        | P      | Pr   | Rheumatoid arthritis                | 32 (26W)            | TENS (HF) = 13                                      | Placebo TENS = 13 (0mA)                                                                                 | Fixed<br>1 x 15 mins / week x 3 weeks<br>3 sessions  | Pain intensity (VAS)<br>Resting pain<br>Pain on movement (grip task) | Grip strength                                               |
| Abreu et al., 2010 <sup>3</sup>          | P      | Pr   | Labour pain                         | 20 (20W)            | TENS (HF) = 10                                      | Placebo TENS = 10 (mA barely perceptible)                                                               | PRN during labour - first stage                      | Pain intensity (VAS)                                                 | Time to analgesia<br>Duration of analgesia                  |
| Acedo et al., 2015 <sup>4</sup>          | P      | Pr   | Neck pain - chronic non-specific    | 64 (64W)            | TENS (LF, burst, - 100pps) = 32                     | IFT = 32                                                                                                | Fixed<br>30 mins / day on days 2, 3, 5<br>3 sessions | Pain intensity (VAS)                                                 | Muscle relaxation (EMG microV)                              |
| Adedoyin et al., 2005 <sup>5</sup>       | P      | Pr   | Osteoarthritis - knee               | 46 (28W)            | TENS (HF) + Exercise = 15                           | IFT + Exercise = 16<br>Exercise alone (SoC, no TENS) = 15                                               | Fixed<br>2 x 20min / week x 4 weeks<br>8 sessions    | Pain intensity (NRS)                                                 | WOMAC                                                       |
| Ahmed, 2010 <sup>6</sup>                 | P      | Pr   | Post-op – inguinal hernia repair    | 60 (0W)             | TENS (HF) + paracetamol + diclofenac as needed = 30 | Placebo TENS (0mA) + paracetamol + diclofenac as needed = 30                                            | Fixed<br>2 x 30 mins / day x 5 days<br>10 sessions   | Pain intensity (VAS)                                                 | Analgesic consumption<br>Assessment of serum cortisol level |
| Ahmed et al., 2020 <sup>7</sup>          | P      | Pr   | Diabetic neuropathic pain           | 30 (19W)            | TENS (LF, AL-TENS) + aerobic exercise = 15          | Repetitive transcranial magnetic stimulation (rTMS) + aerobic exercise = 15                             | Fixed<br>1 x 20 mins / day x 5 days<br>10 sessions   | Pain intensity (VAS)                                                 | Blood $\beta$ -endorphin level                              |
| Alcidi et al., 2007 <sup>8</sup>         | P      | Pr   | Osteoarthritis - knee - acute       | 40 (35W)            | TENS (HF) = 20                                      | Electromagnetic radiation = 20                                                                          | Fixed<br>1 x 20 mins / day x 5 days<br>5 sessions    | Pain intensity (VAS)                                                 | Lequesne's index for knee OA                                |
| Ali et al., 1981 <sup>9</sup>            | P      | Pr   | Post-op – abdominal                 | 40 (24W)            | TENS (HF) + Demerol = 15                            | Placebo TENS (0mA) + Demerol = 10<br>Demerol + No TENS (SoC, no TENS) = 15                              | PRN<br>48h Post-operation                            | No primary outcome                                                   | Analgesic consumption<br>Vc FRc arterial PO2                |
| Alizade and Ahmadzad, 2009 <sup>10</sup> | P      | Pr   | Back pain – low, chronic            | 24 (24W)            | TENS (HF) + NSAIDs (ibuprofen and diclofenac) = 8   | NSAIDs (ibuprofen and diclofenac) + exercise = 8<br>NSAIDs (ibuprofen and diclofenac, SoC, no TENS) = 8 | Fixed<br>30 mins / day x 3 days / week x 5 weeks     | No primary outcome                                                   | Modified Oswestry low back pain disability questionnaire    |



08\_OL-TABLE1\_IncludedStudies

|                                               |   |    |                                                               |             |                                                                                                               |                                                                                                                                                                            |                                                                         |                                                     |                                                                                                                                                                                                         |
|-----------------------------------------------|---|----|---------------------------------------------------------------|-------------|---------------------------------------------------------------------------------------------------------------|----------------------------------------------------------------------------------------------------------------------------------------------------------------------------|-------------------------------------------------------------------------|-----------------------------------------------------|---------------------------------------------------------------------------------------------------------------------------------------------------------------------------------------------------------|
|                                               |   |    |                                                               |             |                                                                                                               |                                                                                                                                                                            | 15 sessions                                                             |                                                     |                                                                                                                                                                                                         |
| Allais et al., 2003 <sup>11</sup>             | P | Pr | Migraine - transformed                                        | 60 (60W)    | TENS (HF, MF, LF) = 20                                                                                        | Infrared laser therapy = 20<br>Acupuncture = 20                                                                                                                            | Fixed<br>30 mins / day x 5<br>day / week x 2<br>weeks<br>10 sessions    | No primary<br>outcome                               | Number of days with headache<br>per month                                                                                                                                                               |
| Alm et al., 1979 <sup>12</sup>                | P | E  | Post-op – podiatric<br>surgery                                |             | TENS (HF) = 50                                                                                                | Placebo TENS (0mA) = 25<br>Control Group (patient records) =<br>25                                                                                                         | PRN<br>Mean duration 20-40<br>mins / treatment<br>repeated              | Pain relief (4-<br>point category<br>scale)         | Analgesic consumption                                                                                                                                                                                   |
| Al-Smadi et al., 2003 <sup>13</sup>           | P | Pr | Back pain –<br>low, multiple sclerosis                        | 15 (n/r)    | TENS (HF) = 5<br>(110 Hz, 200 ms)                                                                             | Placebo TENS = 5<br>(0mA)<br>TENS (LF) = 5<br>(4Hz, 200 ms)                                                                                                                | Fixed<br>1 x 45min / day x 3<br>days / week x 6<br>weeks<br>18 sessions | Pain intensity<br>(VAS)                             | McGill Pain Questionnaire<br>Roland Morris Disability<br>Questionnaire<br>Leeds MS Specific Quality of<br>Life Questionnaire                                                                            |
| Altay et al., 2010 <sup>14</sup>              | P | Pr | Osteoarthritis - knee                                         | 40 (30W)    | TENS (HF) = 20                                                                                                | Placebo TENS = 20<br>(0mA)                                                                                                                                                 | Fixed<br>1 x 40 min / day x 3<br>weeks 21 sessions                      | Pain intensity<br>(VAS)                             | WOMAC<br>Beck Depression<br>Inventory<br>Short Form 36<br>10 steps stairs climbing up-down<br>time<br>6-minute walk distance                                                                            |
| Alvarez-Arenal et al.,<br>2002 <sup>15</sup>  | C | E  | Temporomandibular<br>disorder – bruxism                       | 24 (9W)     | TENS (LF) = 24                                                                                                | Splint = 24                                                                                                                                                                | Fixed<br>1 x 45-60 mins every<br>2 days<br>15 sessions                  | Pain intensity on<br>palpation (4-point<br>scale)   | Tenderness on palpation (4-point<br>scale)<br>Severity of TMD (pantographic<br>reproducibility<br>index -PRI)<br>Joint noises associated<br>with oral opening and closing<br>(number of 'click' noises) |
| Alves Silverio et al.,<br>2015 <sup>16</sup>  | P | Pr | Dysphonic –<br>Muscle tension                                 | 20 (20W)    | TENS (LF) = 10                                                                                                | Laryngeal manual therapy = 10                                                                                                                                              | Fixed<br>2 x 20mins / week x<br>6 weeks<br>12 sessions                  | Pain intensity<br>(VAS)                             | Nordic musculoskeletal symptoms<br>questionnaire<br>Vocal quality - auditory<br>perceptual analysis of voice.                                                                                           |
| Amer-Cuenca et al.,<br>2011 <sup>17</sup>     | P | Pr | Procedural pain –<br>colonoscopy                              | 90<br>(50W) | TENS (RF) = 30                                                                                                | Placebo TENS = 30<br>(0mA)<br>No treatment (unsedated) = 30                                                                                                                | Fixed<br>During procedure                                               | Pain intensity<br>(VAS and 5-point<br>Likert scale) | Unusual or adverse events                                                                                                                                                                               |
| AminiSaman et al.,<br>2020 <sup>18</sup>      | P | Pr | Procedural pain -<br>Needle insertion -<br>Spinal anaesthesia | 60 (25W)    | TENS (HF) = 30                                                                                                | Placebo TENS (0mA) = 30                                                                                                                                                    | Fixed<br>During needle<br>insertion procedure                           | Pain intensity<br>(VAS)                             | Number of attempts to insert<br>needle<br>Duration insertion time                                                                                                                                       |
| Angulo and Colwell Jr,<br>1990 <sup>19</sup>  | P | Pr | Post-op –<br>knee replacement                                 | 48 (28W)    | TENS (sensory threshold) +<br>continuous passive motion +<br>opioids as needed (SoC, No<br>TENS control) = 18 | Placebo TENS (active <SDT) +<br>continuous passive motion +<br>opioids as needed = 18<br>No TENS + continuous passive<br>motion + opioids as needed (SoC,<br>no TENS) = 12 | PRN<br>20 hours / day x 3<br>days                                       | Pain intensity<br>(VAS)                             | Analgesic consumption (Narcotic)<br>Knee flexion range of motion                                                                                                                                        |
| Ardic et al., 2002 <sup>20</sup>              | P | Pr | Myofascial pain                                               | 40 (36W)    | TENS (HF) + Exercise = 15                                                                                     | Exercises (SoC, no TENS) = 10<br>Electrical muscle stimulation +<br>Exercises = 15                                                                                         | Fixed<br>1 x 20mins / day x 2<br>weeks<br>14 sessions                   | Pain intensity<br>(VAS)                             | Pain threshold on palpation<br>Range of motion                                                                                                                                                          |
| Arvidsson and Eriksson,<br>1986 <sup>21</sup> | C | E  | Post-op –                                                     | 15(3W)      | TENS (HF) = 15                                                                                                | Placebo TENS = 15<br>(0mA)                                                                                                                                                 | Fixed<br>1 x 15-20 mins                                                 | Pain intensity (0-<br>20 Borg scale)                | Quadriceps contraction ability<br>(EMG)                                                                                                                                                                 |



08\_OL-TABLE1\_IncludedStudies

|                                        |   |    |                                                            |            |                                                                                     |                                                                                                                                                                                                                                      |                                                                                    |                                                           |                                                                                                                                                           |
|----------------------------------------|---|----|------------------------------------------------------------|------------|-------------------------------------------------------------------------------------|--------------------------------------------------------------------------------------------------------------------------------------------------------------------------------------------------------------------------------------|------------------------------------------------------------------------------------|-----------------------------------------------------------|-----------------------------------------------------------------------------------------------------------------------------------------------------------|
|                                        |   |    | knee ACL reconstruction                                    |            |                                                                                     | Epidural injection (lidocaine 2.5ug/ml) = 15                                                                                                                                                                                         | 1 session                                                                          | Resting pain<br>Pain on movement (quadriceps contraction) |                                                                                                                                                           |
| Asgari et al., 2018 <sup>22</sup>      | P | Pr | Procedural pain – gynaecologic laparoscopy (shoulder pain) | 80 (80W)   | TENS (LF) = 40                                                                      | Fentanyl (SoC, no TENS) = 40                                                                                                                                                                                                         | Fixed 20 mins during procedure                                                     | Pain intensity (VAS)                                      | Analgesic consumption                                                                                                                                     |
| Atamaz et al., 2012 <sup>23</sup>      | P | Pr | Osteoarthritis - knee                                      | 203 (167W) | TENS (HF) + Exercise + Education = 37                                               | Placebo TENS + Exercise + Education = 37<br>IFT + Exercise + Education = 31<br>Placebo IFT + Exercise + Education = 35<br>Shortwave diathermy + Exercise + Education = 31<br>Placebo shortwave diathermy + Exercise + Education = 32 | Fixed 1 x 20 mins / day x 5 / week x 3 weeks<br>15 sessions                        | Pain intensity (VAS)                                      | Analgesic consumption (Paracetamol)<br>Pain free range of motion<br>Patient's satisfaction with the treatment (VAS)<br>WOMAC<br>Nottingham Health Profile |
| Aydin et al., 2005 <sup>24</sup>       | P | Pr | Spasticity – SCI, lower limb pain                          | 21 (15W)   | TENS (HF) + exercise (range of motion, every morning) = 11                          | Baclofen + exercise (range of motion, every morning) (SoC) = 10                                                                                                                                                                      | Fixed 1 x 15 min / day x 15 days<br>15 sessions                                    | Painful spasm scale (3-point scale)                       | Clinical assessment of spasticity - Self-reported and clinical examination<br>Electrophysiologic Assessment of Spasticity<br>H-reflex                     |
| Azatcam et al., 2017 <sup>25</sup>     | P | Pr | Myofascial pain                                            | 69 (38W)   | TENS (HF) + Exercise (Trapezius stretching) = 23                                    | Exercise (Trapezius stretching)(SoC, no TENS) = 23<br>Kinesiology taping + Exercise (Trapezius stretching) = 23                                                                                                                      | Fixed 1 x 20 mins / day x 5 days / week x 2 weeks<br>10 sessions                   | Pain intensity (VAS)                                      | Pain threshold (algometry)<br>Neck Disability Index<br>Cervical range of motion                                                                           |
| Báez-Suárez et al., 2018 <sup>26</sup> | P | Pr | Labour pain                                                | 63 (63W)   | TENS (HF) = 21                                                                      | Placebo TENS = 21 (0mA)<br>TENS (MF) = 21                                                                                                                                                                                            | PRN >30 mins / treatment during labour                                             | Pain intensity (VAS)                                      | Care in Obstetrics Measure for Testing Satisfaction (COMFORTS) scale                                                                                      |
| Bai et al., 2017 <sup>27</sup>         | P | Pr | Dysmenorrhea                                               | 134 (134W) | TENS (AF) + Ibuprofen as needed = 67                                                | Placebo TENS (0mA) + ibuprofen as needed) = 67 (0mA)                                                                                                                                                                                 | Fixed 1 x 30 mins / day x 3 days x 3 menstrual cycles<br>9 sessions                | Pain intensity (NRS)                                      | Analgesic consumption (Ibuprofen)<br>Pain relief duration<br>World Health Organization quality of life (WHOQOL)-BREF                                      |
| Baki et al., 2015 <sup>28</sup>        | P | Pr | Post-op – thoracotomy                                      | 40 (15W)   | TENS (HF) + tramadol PCA = 20                                                       | Paravertebral block+ tramadol PCA = 20                                                                                                                                                                                               | PRN 24 h post op                                                                   | Pain intensity (VAS)<br>• Resting pain<br>• During cough  | Analgesic consumption (Tramadol)<br>Respiratory function<br>FEV1, FEV1/FVC, mean arterial pressure, heart rate, saturation of oxygen                      |
| Ballegaard et al., 1985 <sup>29</sup>  | C | E  | Pancreatitis – chronic                                     | 16(NR)     | TENS (HF, conventional followed by LF, acupuncture-like) + morphine on request = 11 | Placebo TENS (NR) + morphine on request = 11                                                                                                                                                                                         | Fixed 1 x 30 mins / day x 1 week<br>7 sessions<br>Repeated at each of 3 body sites | Pain intensity (VAS)                                      | Analgesic consumption (Morphine)<br>Treatment preference<br>Daily assessment of well-being (VAS)                                                          |

08\_OL-TABLE1\_IncludedStudies

|                                            |   |    |                                                   |          |                                                          |                                                                               |                                                                              |                                                                                                  |                                                                                                                                                                                                                                                                                                                                                   |
|--------------------------------------------|---|----|---------------------------------------------------|----------|----------------------------------------------------------|-------------------------------------------------------------------------------|------------------------------------------------------------------------------|--------------------------------------------------------------------------------------------------|---------------------------------------------------------------------------------------------------------------------------------------------------------------------------------------------------------------------------------------------------------------------------------------------------------------------------------------------------|
|                                            |   |    |                                                   |          |                                                          |                                                                               | 21 sessions                                                                  |                                                                                                  |                                                                                                                                                                                                                                                                                                                                                   |
| Barbarisi et al., 2010 <sup>30</sup>       | P | Pr | Post herpetic neuralgia                           | 30 (15W) | TENS (HF) + Pregabalin = 16                              | Placebo TENS + Pregabalin (0mA) = 14                                          | Fixed<br>1 x 30 mins / day x 9 visits (over 4 weeks)<br>9 sessions           | Pain intensity (VAS)                                                                             | SF-McGill Pain Questionnaire<br>Sleep interference                                                                                                                                                                                                                                                                                                |
| Barker et al., 2006 <sup>31</sup>          | P | Pr | Pelvic pain – acute, during transport to hospital | 62 (62W) | TENS (HF) = 29                                           | Placebo TENS (0mA) = 33                                                       | PRN<br>~ 30 mins during transportation to hospital<br>1 session              | Pain intensity (VAS)                                                                             | Oscillometric blood pressure<br>Heart rate<br>Anxiety (VAS)<br>Signs of sympathetic Activity (vasoconstriction/dilation of arms)                                                                                                                                                                                                                  |
| Barker et al., 2008 <sup>32</sup>          | P | Pr | Back pain – low, chronic                          | 60 (30W) | TENS (HF) = 28                                           | Sensory discrimination training using FairMed device = 32                     | PRN<br>2 x 30 min / day x 3 weeks<br>21 sessions                             | Pain intensity (VAS)<br>• present pain<br>• average pain over a week<br>• worst pain over a week | Oswestry Disability Index<br>Functional physical tests<br>• 5-minute walking distance<br>• 1-minute stair climb<br>• 1 minute standing up and sitting down from a chair<br>Health Anxiety and Depression Scale<br>Tampa Scale Kinesiophobia<br>Pain Coping Scale<br>Pain Self Efficacy Questionnaire<br>Patient Global Impression of Change scale |
| Başkurt et al., 2006 <sup>33</sup>         | P | E  | Shoulder impingement - stage I                    | 92 (60W) | TENS (HF) = 30                                           | Heat (39°, SoC no TENS) = 31<br>Heat + TENS = 31                              | Fixed<br>1 x 20 mins<br>1 session                                            | Pain intensity (VAS)                                                                             | Pressure algometry (pressure pain threshold)                                                                                                                                                                                                                                                                                                      |
| Bayindir et al., 1991 <sup>34</sup>        | P | E  | Post-op – cardiac surgery                         | 89 (29W) | TENS (LF, burst) = 59                                    | Placebo TENS = 30 (0mA)                                                       | Fixed<br>1 x 180 mins                                                        | Pain intensity (VAS)                                                                             | None                                                                                                                                                                                                                                                                                                                                              |
| Beckwée et al., 2018 <sup>35</sup>         | P | Pr | Post-op – total knee arthroplasty                 | 53 (34W) | TENS (LF, burst) + analgesics + physiotherapy (SoC) = 25 | Placebo TENS + analgesics + physiotherapy (SoC) = 28 (0mA)                    | Fixed<br>1x 40 mins / day during passive mobilisation x 5 days<br>5 sessions | Pain intensity (VAS)                                                                             | Analgesic consumption<br>• Daily opioid analgesia<br>• cumulative opioid analgesia<br>• Non-opioid analgesia<br>Range of motion - Knee flexion                                                                                                                                                                                                    |
| Benedetti et al., 1997 <sup>36</sup>       | P | E  | Post-op – thoracic                                | 324 (NR) | TENS (HF) = 103                                          | Placebo TENS (0mA) = 106<br>Conventional drugs (SoC, no TENS) = 115 (Control) | Fixed<br>2 x 60 mins in recovery room first 12 h only<br>2 sessions          | Pain intensity (NRS)                                                                             | Analgesic consumption<br>Time to request further analgesia.                                                                                                                                                                                                                                                                                       |
| Bennett et al., 2010 <sup>37</sup>         | C | E  | Cancer bone pain                                  | 24 (6W)  | TENS (HF) = 24                                           | Placebo TENS = 24 (0mA)                                                       | Fixed<br>1 x 60 mins<br>1 session                                            | Pain intensity (NRS and VRS 4 categories)<br>• Resting pain<br>• Pain on movement                | SF-McGill Pain Questionnaire<br>Satisfaction questionnaire                                                                                                                                                                                                                                                                                        |
| Bergeron-Vezina et al., 2018 <sup>38</sup> | C | E  | Back pain – chronic, low, non-specific            | 21 (11W) | TENS (HF) = 21 (maintaining pulse amplitude)             | TENS (HF) = 21 (pulse amplitude fading)                                       | Fixed<br>1 x 25 mins<br>1 session                                            | Pain intensity (VAS)                                                                             | Pain unpleasantness (VAS)<br>Patient's Global Impression of Change scale                                                                                                                                                                                                                                                                          |

08\_OL-TABLE1\_IncludedStudies

|                                          |   |    |                                                    |            |                                                            |                                                                                                                                                                                              |                                                              |                                                                                       |                                                                                                                                                                                                                                                   |
|------------------------------------------|---|----|----------------------------------------------------|------------|------------------------------------------------------------|----------------------------------------------------------------------------------------------------------------------------------------------------------------------------------------------|--------------------------------------------------------------|---------------------------------------------------------------------------------------|---------------------------------------------------------------------------------------------------------------------------------------------------------------------------------------------------------------------------------------------------|
| Bertalanffy et al., 2005 <sup>39</sup>   | P | Pr | Back pain - acute, low, during emergency transport | 74 (30W)   | TENS (HF) = 35                                             | Placebo TENS = 36 (0mA)                                                                                                                                                                      | Fixed<br>1 x ~30 mins during transportation<br>1 session     | Pain intensity (VAS)                                                                  | Anxiety (VAS)<br>Oscillometric blood pressure<br>Heart rate                                                                                                                                                                                       |
| Bi et al., 2015 <sup>40</sup>            | P | Pr | Spinal cord injury                                 | 52 (16W)   | TENS (LF) = 26                                             | Placebo TENS = 26 (0mA)                                                                                                                                                                      | Fixed<br>1 x 20mins/day x 3 / week x 12 weeks<br>36 sessions | Pain intensity (VAS)                                                                  | McGill Pain Questionnaire                                                                                                                                                                                                                         |
| Bilgili et al., 2016 <sup>41</sup>       | P | Pr | Complex regional pain syndrome                     | 30 (16W)   | TENS (HF) + contrast bath + whirlpool bath + exercise = 15 | Placebo TENS (0mA) + contrast bath + whirlpool bath + exercise = 15                                                                                                                          | Fixed<br>1 x 20 mins / day x 15 days<br>15 sessions          | Pain intensity (VAS) at rest                                                          | LANSS<br>Douleur Neuropathique en 4 Questions (DN-4)<br>Volumetric oedema (mm)<br>Hand mobility (distance between the 2nd and 5th finger pulp and distal palmar line in cm)<br>Range of motion - wrist<br>Hand grip strength<br>Duruöz Hand Index |
| Binder et al., 2011 <sup>42</sup>        | P | Pr | Post-op – caesarean                                | 42 (42W)   | TENS (HF) + morphine PCA = 22                              | Morphine PCA (SoC, no TENS) = 20                                                                                                                                                             | PRN<br>Over 24 hours                                         | Pain intensity (VAS)                                                                  | Analgesic consumption (Morphine) - PCA<br>Sedation perception (VAS)                                                                                                                                                                               |
| Bjersa and Andersson, 2014 <sup>43</sup> | P | E  | Post-op – pancreatic surgery                       | 20 (N/R)   | TENS (HF) + SoC (medication) = 9                           | Placebo TENS = 11 (stimulation as low as possible) + SoC (medication)                                                                                                                        | PRN >30m/session                                             | Pain intensity (VAS)<br>• Resting (lying)<br>• On movement (walking + deep breathing) | Analgesic consumption (Morphine)<br>Quality of Recovery 40 (QoR-40)<br>EDA infusion rate (ml/h)<br>Total time of TENS usage in minutes during the day of EDA termination and the day after.                                                       |
| Bjersa et al., 2015 <sup>44</sup>        | P | E  | Post-op – colon surgery                            | 30 (14W)   | TENS (HF) + SoC (medication) = 24                          | Placebo TENS = 26 (stimulation as low as possible) + SoC (medication)                                                                                                                        | PRN >30m/session                                             | Pain intensity (VAS)<br>• Resting (lying)<br>• On movement (walking + deep breathing) | Analgesic consumption (oxycodone)<br>Time of TENS usage during the 24 hours after EDA termination<br>Quality of Recovery 40 (QoR-40)                                                                                                              |
| Bloodworth et al., 2004 <sup>45</sup>    | C | E  | Radiculopathy – chronic                            | 13 (7W)    | TENS (HF, conventional TENS back) = 13                     | Placebo TENS (0mA, back) = 13<br>Placebo TENS (0mA, leg) = 13<br>TENS (HF, leg) = 13<br>TENS (RF, back) = 13<br>TENS (RF, leg) = 13                                                          | Fixed<br>1 x 10 mins<br>1 session                            | Pain intensity (VAS)                                                                  | McGill Pain Questionnaire<br>Walking speed (feet per second)                                                                                                                                                                                      |
| Bolat et al., 2019 <sup>46</sup>         | P | Pr | Procedural pain - transrectal prostatic biopsy     | 138 (0W)   | TENS (HF) + antibiotic = 73                                | SoC - intrarectal administration of 60 mg lidocaine gel, an additional infiltration of 5 mL of prilocaine and bupivacaine mixture (5 mL of 2% prilocaine and 5 mL of 0.25% bupivacaine) = 65 | Fixed<br>During procedure                                    | Pain intensity (NRS)<br>• probe insertion<br>• biopsy<br>• post-biopsy                | Biopsy times                                                                                                                                                                                                                                      |
| Bono et al., 2015 <sup>47</sup>          | P | Pr | Migraine / tension-type headache - Chronic         | 160 (127W) | TENS (HF, occipital) + acute medications = 108             | Placebo TENS + acute medications = 52 (0mA)                                                                                                                                                  | Fixed<br>3 x 30 mins / day x 14 days                         | Pain intensity (VAS)                                                                  | Analgesic consumption<br>Headache-free days per month                                                                                                                                                                                             |

08\_OL-TABLE1\_IncludedStudies

|                                            |   |    |                                                                      |            |                                                                   |                                                                                                   |                                                       |                                                                           |                                                                                                                                                                                       |
|--------------------------------------------|---|----|----------------------------------------------------------------------|------------|-------------------------------------------------------------------|---------------------------------------------------------------------------------------------------|-------------------------------------------------------|---------------------------------------------------------------------------|---------------------------------------------------------------------------------------------------------------------------------------------------------------------------------------|
|                                            |   |    |                                                                      |            |                                                                   |                                                                                                   | 14 sessions                                           |                                                                           | Allodynia symptom check list (12-item)<br>Migraine Disability Assessment Questionnaire<br>Beck Depression Inventory-II<br>Hamilton Anxiety Rating Scale                               |
| Borjesson et al., 1997 <sup>48</sup>       | P | E  | Angina – unstable                                                    | 30 (11W)   | TENS (HF) + mediation (angina/analgesia) = 14                     | Placebo TENS (low level stimulation <10mA on hips) + mediation (angina/analgesia) = 16            | Fixed<br>4 x 30 mins / day<br>plus PRN for attacks    | Pain intensity (VAS)<br>• Rest                                            | Analgesic consumption<br>Ischemic episodes, ECG and biochemical outcomes<br>Treatment feasibility including AEs                                                                       |
| Borjesson et al., 1998 <sup>49</sup>       | C | E  | Procedural Pain - oesophageal manometry pain                         | 18 (10W)   | TENS (HF) = 18 (at pain - neck)                                   | Placebo TENS = 18 (active, >SDT, remote to pain - hips)                                           | Fixed<br>Before and during procedure                  | Pain intensity (11-point Borg scale)<br>• Oesophageal distension          | Hemodynamic<br>BP, heart rate, ECG<br>Manometric variables<br>Oesophageal pH                                                                                                          |
| Borup et al., 2009 <sup>50</sup>           | P | E  | Labour pain                                                          | 607 (607W) | TENS (HF) + analgesics as needed = 144                            | Traditional analgesics (Control) (SoC, no TENS) = 149<br>Acupuncture + analgesics as needed = 314 | PRN<br>20-45 mins / sessions                          | Pain intensity (VAS)                                                      | Analgesic consumption Non-drug requirements<br>Duration of labour<br>Use of oxytocin Mode of delivery<br>Postpartum<br>Haemorrhage<br>Apgar score<br>Umbilical cord<br>blood pH value |
| Breit and Van der Wall, 2004 <sup>51</sup> | P | E  | Post-op - total knee arthroplasty                                    | 67 (37W)   | TENS (NR) + morphine PCA = 25                                     | Placebo TENS (0mA) + morphine PCA = 22<br>Morphine PCA (SoC, no TENS) = 22                        | PRN<br>1 x 24h post op                                | Pain intensity (VAS)                                                      | Analgesic consumption<br>• Cumulative dose morphine by PCA                                                                                                                            |
| Buchmuller et al., 2012 <sup>52</sup>      | P | Pr | Back pain – chronic low non-specific with and without radicular pain | 236 (148W) | TENS (HF+LF burst) + daily analgesic medication as required = 117 | Placebo TENS (0mA) + daily analgesic medication as required = 119                                 | Fixed<br>4 x 60 mins / day x 3 months<br>~?? sessions | Pain intensity (VAS)<br>• Weekly                                          | Analgesic consumption (anti-inflammatory)<br>Roland Morris Disability Questionnaire<br>Dallas questionnaire<br>SF-36<br>Compliance with TENS treatment<br>Quality of life             |
| Bulut et al., 2011 <sup>53</sup>           | P | Pr | Neuropathic pain – chronic peripheral                                | 40 (23W)   | TENS (HF) = 20                                                    | Placebo TENS = 20 (0mA)                                                                           | Fixed<br>1 x 30 mins / day x 20 days<br>20 sessions   | Pain intensity (VAS)                                                      | Pain grade (6 categories)                                                                                                                                                             |
| Bundsen et al., 1982 <sup>54</sup>         | P | Pr | Labour pain                                                          | 24 (24W)   | TENS (HF + LF burst) = 15                                         | Conventional analgesia, control) (SoC, no TENS) = 9                                               | PRN<br>>1 x 15-30 mins<br>During Labour               | Pain intensity (5-point categorical scale)<br>• low-back / abdominal pain | Pain experience questionnaire<br>Uterine activity<br>Foetal and neonatal condition                                                                                                    |
| Can et al., 2003 <sup>55</sup>             | P | E  | Knee – chronic, patellofemoral pain                                  | 30 (22W)   | TENS (HF) = 16 (23 knees)                                         | Diadynamic current = 14 (19 knees)                                                                | Fixed                                                 | Pain intensity (VAS)                                                      | Lysholm knee scoring scale and squat                                                                                                                                                  |

08\_OL-TABLE1\_IncludedStudies

|                                                     |   |    |                                                   |            |                                                                   |                                                                                                                                                                                                     |                                                                   |                                                |                                                                                                                         |
|-----------------------------------------------------|---|----|---------------------------------------------------|------------|-------------------------------------------------------------------|-----------------------------------------------------------------------------------------------------------------------------------------------------------------------------------------------------|-------------------------------------------------------------------|------------------------------------------------|-------------------------------------------------------------------------------------------------------------------------|
|                                                     |   |    |                                                   |            |                                                                   |                                                                                                                                                                                                     | 1 x 30 mins x 4 to 5 / week x 6 weeks <30 sessions                |                                                | Number of squats performed in 30 seconds<br>4-level activity test                                                       |
| Casale et al., 2013 <sup>56</sup>                   | P | Pr | Carpal tunnel syndrome                            | 20 (10W)   | TENS (HF) = 10                                                    | Low level laser therapy = 10                                                                                                                                                                        | Fixed<br>1 x 30 mins / day x 3 weeks<br>15 sessions               | Pain intensity (VAS)                           | Severity paraesthesia<br>Median nerve distal motor latency and sensory nerve conduction velocity                        |
| Çebi, 2019 <sup>57</sup>                            | P | Pr | Post op - pain after impacted third molar surgery | 30 (15W)   | TENS (HF) = ?15                                                   | Routine care (SoC, Pharmacological - Flurbiprofen 100 mg, amoxicillin, chlorhexidine gluconate) = ? 15                                                                                              | Fixed<br>1 x 15 mins / day x 5 days                               | Pain intensity (VAS)                           | None                                                                                                                    |
| Celik et al., 2013 <sup>58</sup>                    | P | Pr | Spinal cord injury, neuropathic pain              | 33 (9W)    | TENS (LF) = 17                                                    | Placebo TENS = 16 (0mA) = 16                                                                                                                                                                        | Fixed<br>1x 30m /day x 10 days<br>10 sessions                     | Pain intensity (VAS)                           | None                                                                                                                    |
| Cetin et al., 2008 <sup>59</sup>                    | P | Pr | Osteoarthritis - knee                             | 100 (100W) | TENS (HF) + hot packs + isokinetic exercise = 20 (Group 2)        | Hot packs + isokinetic exercise) (SoC, no TENS) = 20<br>Shortwave diathermy + hot packs + isokinetic exercise = 20<br>Ultrasound + hot packs + isokinetic exercise = 20<br>Isokinetic exercise = 20 | Fixed<br>1 x 20 mins x 3 / week x 8 weeks<br>24 sessions          | Pain intensity (VAS)<br>• After walk           | Ambulation Activity - time (secs) to walk 50 m<br>Lequesne index<br>Peak torque levels (N·m) knee flexion and extension |
| Chandra et al., 2010 <sup>60</sup>                  | P | E  | Post-op – thoracotomy                             | 60 (29W)   | TENS (HF) + epidural 10 ml of 0.125% bupivacaine at 2-hourly = 30 | Placebo TENS (0mA) + epidural 10 ml of 0.125% bupivacaine at 2-hourly = 30                                                                                                                          | Fixed<br>1 x 45 mins                                              | Pain intensity (VAS)                           | Systolic blood pressure<br>Side effects.                                                                                |
| Cheing and Hui-Chan, 1999 <sup>61</sup>             | P | E  | Back pain - chronic low non-specific              | 30 (9W)    | TENS (HF) = 15                                                    | Placebo TENS = 15 (0mA)                                                                                                                                                                             | Fixed<br>1 x 60 mins                                              | Pain intensity (VAS)                           | Pain intensity (VAS) to electrically-evoked pain                                                                        |
| Cheing and Luk, 2005 <sup>62</sup>                  | P | E  | Neuropathic pain                                  | 19 (3W)    | TENS (HF) = 10                                                    | Placebo TENS = 9 (0mA)                                                                                                                                                                              | Fixed<br>1x 20m/day x5 days x 2weeks<br>10 sessions               | Pain intensity (VAS)                           | Downey Hand Centre Hand Sensitivity Test<br>Flexion reflex                                                              |
| Cheing et al., 2002 <sup>63</sup>                   | P | E  | Osteoarthritis - knee                             | 62 (52W)   | TENS (HF) = 16                                                    | Placebo TENS = 16 (0mA)<br>Exercise (SoC, no TENS control) = 15<br>TENS + Exercise = 15                                                                                                             | Fixed<br>1 x 60 mins/day x 5 days / week x 4 weeks<br>20 sessions | Pain intensity (VAS)                           | None                                                                                                                    |
| Cheing et al., 2003 <sup>64</sup>                   | P | E  | Osteoarthritis - knee                             | 38 (34W)   | TENS (HF) = 10 (60 mins)                                          | Placebo TENS = 8 (0mA)<br>TENS = 10 (20 mins)<br>TENS = 10 (40 mins)                                                                                                                                | Fixed<br>1 x 60 mins/day x 5 days / week x 2 weeks<br>10 sessions | Pain intensity (VAS)<br>• On movement          | Time of ‘half-life’ for analgesic effect                                                                                |
| Chellappa and Thirupathy, 2020 <sup>65</sup>        | P | Pr | Temporomandibular joint disorder                  | 60 (NR)    | TENS (HF) = 30                                                    | LLLT = 30                                                                                                                                                                                           | Fixed<br>1 x 15 min/day x 2 / week x 3 weeks                      | Pain intensity (VAS, may be categorical scale) | Range of motion<br>Palpation                                                                                            |
| Cherian et al., 2016 <sup>66</sup> – Primary Report | P | Pr | Osteoarthritis - knee                             | 70 (46)    | TENS (AF) = 33                                                    | Standard of care = corticosteroid injections + exercises + pharmaceutical management) (SoC, no TENS) = 10                                                                                           | PRN<br>mean = 27 hours / week x 3 months                          | Pain intensity (VAS)                           | Analgesic consumption<br>Knee Society Scale (KSS)<br>Lower extremity functional scale (LEFS)                            |

08\_OL-TABLE1\_IncludedStudies

|                                                   |                                                                                                    |   |    |                                                              |                                              |                                                      |                                                                                                |                                                                |                                                                                                                                                                                             |                                                                                                                                                                                                                                                                                                                    |
|---------------------------------------------------|----------------------------------------------------------------------------------------------------|---|----|--------------------------------------------------------------|----------------------------------------------|------------------------------------------------------|------------------------------------------------------------------------------------------------|----------------------------------------------------------------|---------------------------------------------------------------------------------------------------------------------------------------------------------------------------------------------|--------------------------------------------------------------------------------------------------------------------------------------------------------------------------------------------------------------------------------------------------------------------------------------------------------------------|
| 1<br>2<br>3<br>4<br>5<br>6<br>7<br>8              | Secondary Reports<br>Cherian et al., 2015 <sup>67</sup><br>Cherian et al., 2016 <sup>68</sup>      |   |    |                                                              |                                              |                                                      |                                                                                                |                                                                | SF-36<br>Timed up and-go (TUG)<br>5-repetition chair rise<br>Timed stair climb test<br>6-inch step test<br>2-minute walk test<br>Isokinetic strength<br>Active and passive range of motion. |                                                                                                                                                                                                                                                                                                                    |
| 9<br>10<br>11<br>12<br>13<br>14<br>15<br>16<br>17 | Chesterton et al., 2013 <sup>69</sup><br><br>Secondary Report<br>Lewis, et al., 2015 <sup>70</sup> | P | Pr | Tendinitis - Lateral epicondylitis - Tennis elbow            | 241 (109W)                                   | TENS (HF) + Primary care management = 121            | Primary care management (exercises + education) (SoC, no TENS) = 120                           | PRN<br>> 1 x 45 mins / day whenever symptoms x 6 weeks         | Pain intensity (NRS)                                                                                                                                                                        | Global change in elbow pain (5-point adjectival scale)<br>Pain and limitation in function (patient-rated tennis elbow evaluation)<br>Number of days of sick leave due to tennis elbow<br>EuroQoL EQ-5D (Quality of life)<br>SF-12<br>Changes in health beliefs and perceptions<br>Adherence to treatment protocols |
| 18<br>19<br>20<br>21<br>22<br>23                  | Chia et al., 1990 <sup>71</sup>                                                                    | P | Pr | Labour pain                                                  | Sample 1: 101 (101W)<br>Sample 2: 20 (20W) - | Sample 1: TENS (AF) = 48<br>Sample 2: TENS (AF) = 10 | Sample 1: Inhalation analgesia = 53 (ENTONOX)<br>Sample 2: Inhalation analgesia = 10 (ENTONOX) | PRN<br>During labour                                           | Pain intensity (categorical scale)<br>Pain relief (categorical scale)                                                                                                                       | Analgesic consumption<br>• Request<br>Treatment failure - request to change type of treatment<br>Duration of use of treatment<br>Cervical dilatation and number of contractions / 10 mins                                                                                                                          |
| 24<br>25<br>26<br>27                              | Chiou et al., 2019 <sup>72</sup>                                                                   | P | Pr | Myofascial pain in neck and shoulder from spinal cord injury | 64 (12W)                                     | TENS (LF/HF, on trigger points) = 30                 | TENS (HF, on remote acupuncture Points) = 30                                                   | Fixed<br>1 x 20 mins / day x 7 days x 1 week                   | Pain intensity (VAS)                                                                                                                                                                        | Short-form McGill Pain Questionnaire<br>Hospital Anxiety and Depression Scale<br>Pittsburgh Sleep Quality Index                                                                                                                                                                                                    |
| 28<br>29<br>30                                    | Chitsaz et al., 2009 <sup>73</sup>                                                                 | P | Pr | Spasticity – multiple sclerosis                              | 59 (44W)                                     | TENS (HF) = 29                                       | Nortriptyline = 30                                                                             | PRN<br>>20-30 mins x 3/day x 8 weeks                           | Pain intensity (VAS)<br>• Average                                                                                                                                                           | Intensity of sensory complaints (VAS)                                                                                                                                                                                                                                                                              |
| 31<br>32<br>33<br>34                              | Chiu et al., 2005 <sup>74</sup>                                                                    | P | Pr | Neck pain - chronic non-specific                             | 218 (149W)                                   | TENS (HF) + infrared radiation = 78                  | Exercise + Infrared radiation = 67<br>Infrared radiation alone (warmth) = 78                   | Fixed<br>1 x 30 mins / day x 2 / week x 6 weeks<br>12 sessions | Pain intensity (NRS, verbal)                                                                                                                                                                | Analgesic consumption<br>Northwick Park Neck Pain questionnaire<br>Percentage subjects on sick leave<br>Peak isometric strength neck muscles.                                                                                                                                                                      |
| 35<br>36<br>37<br>38                              | Cipriano et al., 2008 <sup>75</sup>                                                                | P | Pr | Post-op – cardiac surgery                                    | 45 (13W)                                     | TENS (HF) = 23                                       | Placebo TENS = 22 (active, >SDT-infrequent pulses)                                             | Fixed<br>1 x 240mins (4h) on the third postoperative           | Pain intensity (VAS)<br>• Cough                                                                                                                                                             | Spirometry<br>• vital capacity<br>• tidal volume<br>• respiratory rate<br>Electrical muscle activity (EMG)                                                                                                                                                                                                         |
| 39<br>40<br>41<br>42                              | Cipriano et al., 2014 <sup>76</sup>                                                                | P | E  | Post-op cardiac surgery                                      | 38 (18W)                                     | TENS (HF) + pethidine HCl, 20 mg = 20                | Placebo TENS (active, >SDT-infrequent pulses) + pethidine HCl, 20 mg = 18 (active)             | Fixed<br>4 x 30mins/day x 5 days<br>5 sessions                 | Pain intensity (VAS)                                                                                                                                                                        | Analgesic consumption (Opioid)<br>Physiological measurements<br>Mean arterial pressure                                                                                                                                                                                                                             |



08\_OL-TABLE1\_IncludedStudies

|                                             |   |    |                                            |            |                                                                                         |                                                                                                                   |                                                                |                                                              |                                                                                                                                                                                                              |
|---------------------------------------------|---|----|--------------------------------------------|------------|-----------------------------------------------------------------------------------------|-------------------------------------------------------------------------------------------------------------------|----------------------------------------------------------------|--------------------------------------------------------------|--------------------------------------------------------------------------------------------------------------------------------------------------------------------------------------------------------------|
|                                             |   |    |                                            |            |                                                                                         |                                                                                                                   |                                                                |                                                              | Femoral blood flow<br>Femoral vascular conductance<br>Beta-Endorphin levels<br>Sympathetic stimulation test<br>6-min walking test                                                                            |
| Coelho de Amorim et al., 2014 <sup>77</sup> | P | Pr | Osteoarthritis - knee                      | 24 (20W)   | TENS (HF) = 12                                                                          | Manual therapy = 12                                                                                               | Fixed<br>1 x 20 mins / day x 3 / week x 4 weeks<br>12 sessions | Pain intensity (VAS)                                         | WOMAC<br>Stiffness<br>Function                                                                                                                                                                               |
| Cooperman et al., 1977 <sup>78</sup>        | P | Pr | Post-op – abdomen                          | 50 (36W)   | TENS (HF) + analgesics as rescue (diazepam, 10 mg i.m., meperidol, 75-100 mg i.m.) = 26 | Placebo TENS = 24 (0mA)                                                                                           | PRN x 5 days                                                   | No primary outcomes                                          | Analgesic consumption                                                                                                                                                                                        |
| Coyne et al., 1995 <sup>79</sup>            | P | E  | Procedural pain - intravenous needlesticks | 61 (35W)   | TENS (HF) = 19                                                                          | Placebo TENS = 21 (not described)                                                                                 | Fixed<br>1 x 12-32 mins<br>1 session                           | Pain intensity (VAS)                                         | Pain unpleasantness (VAS)                                                                                                                                                                                    |
| Crompton et al., 1992 <sup>80</sup>         | P | Pr | Procedural pain – cervical laser treatment | 100 (100W) | TENS (HF) = 34                                                                          | Local anaesthetic (SoC, no TENS) = 35<br>TENS + local anaesthetic (lignocaine) = 29                               | Fixed<br>1 x <20 mins (duration of procedure)                  | Pain intensity (VAS)                                         | Satisfaction and utility of TENS                                                                                                                                                                             |
| Cuschieri et al., 1985 <sup>81</sup>        | P | Pr | Post-op – abdomen                          | 106 (62W)  | TENS (HF) + morphine = 53                                                               | Placebo TENS + morphine = 53 (0mA)                                                                                | PRN<br>72 hours                                                | Pain intensity (VAS)                                         | Analgesic consumption (Morphine)<br>Arterial blood gas analysis<br>Pulmonary complications                                                                                                                   |
| Cuschieri et al., 1987 <sup>82</sup>        | P | Pr | Ischaemic pain - critical leg at rest      | 20 (10W)   | TENS (NR) + morphine = 10                                                               | Placebo TENS + morphine = 10 (0mA)                                                                                | PRN<br>48 hours                                                | Pain intensity (VAS)                                         | Analgesic consumption (Morphine)                                                                                                                                                                             |
| da Silva et al., 2008 <sup>83</sup>         | P | Pr | Fibromyalgia                               | 10 (9W)    | TENS (HF) = 5                                                                           | Hydrotherapy = 5                                                                                                  | Fixed<br>1 x 40 mins/day x3/week x 3 weeks<br>9 sessions       | Pain intensity (VAS)                                         | SF-36<br>Nottingham Health Profile<br>Beck Depression Index<br>Finger-to-floor test (flexibility test)                                                                                                       |
| da Silva et al., 2015 <sup>84</sup>         | P | Pr | Post-op – liposuction                      | 42 (42W)   | TENS (HF) + analgesics (morphine + dipyrone) = 21                                       | Placebo TENS + analgesics (morphine + dipyrone) = 21 (0mA)                                                        | Fixed<br>1 x 30 mins (2h after procedure<br>1 session)         | Pain intensity (VAS)                                         | Analgesic consumption<br>Number and types of adverse effects<br>McGill Pain Questionnaire<br>Patient satisfaction                                                                                            |
| Dailey et al., 2013 <sup>85</sup>           | C | E  | Fibromyalgia                               | 43 (40W)   | TENS (HF) + other treatments (stable) = 43                                              | Placebo TENS = 43 (fading) + other treatments (stable)<br>No TENS + other treatments (stable) (SoC, no TENS) = 43 | Fixed<br>1 x 60-75 mins<br>1 session                           | Pain intensity (VAS)<br>• Resting pain<br>• Pain on movement | Pressure pain threshold at tender points (algometry)<br>Conditioned pain modulation<br>Fatigue at rest and movement (VAS)<br>6 Minute Walk Test<br>Range of Motion<br>Sit to Stand Test<br>Single Leg Stance |
| Dailey et al., 2020 <sup>86</sup>           | P | Pr | Fibromyalgia                               | 301 (301W) | TENS (MF) + routine care (pharmacology) = 103                                           | Placebo TENS (F) = 99                                                                                             | PRN                                                            | Pain intensity (NRS)                                         | Brief Pain Inventory                                                                                                                                                                                         |

08\_OL-TABLE1\_IncludedStudies

|                                       |   |    |                                                    |            |                                                                                            |                                                                                                     |                                                       |                                                                                                                  |                                                                                                                                                                                                                                                                       |
|---------------------------------------|---|----|----------------------------------------------------|------------|--------------------------------------------------------------------------------------------|-----------------------------------------------------------------------------------------------------|-------------------------------------------------------|------------------------------------------------------------------------------------------------------------------|-----------------------------------------------------------------------------------------------------------------------------------------------------------------------------------------------------------------------------------------------------------------------|
|                                       |   |    |                                                    |            |                                                                                            | No TENS (SoC, pharmacology) = 99                                                                    | At home during activity > 1 x 2 hours / day x 4 weeks | <ul style="list-style-type: none"> <li>Resting pain</li> <li>Pain on movement (during 6min walk test)</li> </ul> | Fatigue to 6MWT (NRS) and Multidimensional Assessment of Fatigue<br>Function - International Physical Activity Questionnaire (IPAQ) short form<br>Disease impact<br>Quality of life<br>Global impression of change<br>Fear of Movement<br>Other psychological factors |
| Davies, 1982 <sup>87</sup>            | P | Pr | Post-op – caesarean                                | 35 (35W)   | TENS (HF) + analgesics (papaveretum i.m., paracetamol, Dextropropoxphene as required) = 21 | Placebo TENS (0mA) + analgesics (papaveretum i.m., paracetamol, Dextropropoxphene as required) = 14 | PRN<br>24 hours                                       | Pain intensity (VAS)                                                                                             | Analgesic consumption (opioid)                                                                                                                                                                                                                                        |
| Dawood and Ramos, 1990 <sup>88</sup>  | C | E  | Dysmenorrhea - primary                             | 32 (32W)   | TENS (HF) + ibuprofen if needed = 32                                                       | Placebo TENS + ibuprofen if needed = 32 (0mA)<br>Ibuprofen (SoC, no TENS) = 32                      | PRN continuously for first 8 hours then PRN           | Pain intensity (5 item categorical scale)                                                                        | Analgesic consumption (Ibuprofen)<br>Pain relief (5 item category scale)<br>Menstrual symptoms including pain intensity (5 categories)                                                                                                                                |
| De Angelis et al., 2003 <sup>89</sup> | P | Pr | Procedural pain – hysterectomy                     | 142 (142W) | TENS (HF) = 71                                                                             | No treatment = 71                                                                                   | Fixed<br>Duration of procedure                        | Pain intensity (VAS) during procedure                                                                            | Pain relief<br>Duration of hysteroscopy<br>CO <sub>2</sub> flow<br>Heart rate                                                                                                                                                                                         |
| De Giorgi et al., 2017 <sup>90</sup>  | P | Pr | Myalgia - Chronic facial (temporomandibular joint) | 49 (49W)   | TENS (HF) = 34                                                                             | No treatment (waiting list control) = 15                                                            | Fixed<br>1 x 60 mins /day x 10 weeks<br>10 sessions   | Pain intensity (VAS)                                                                                             | Pericranial Muscle Tenderness Score<br>Cervical Muscle Tenderness Score                                                                                                                                                                                               |
| de Oliveira, 2012 <sup>91</sup>       | P | E  | Dysmenorrhea - primary                             | 15 (15W)   | TENS (HF) = 5                                                                              | Placebo TENS = 5 (0mA)<br>TENS (LF) = 5                                                             | Fixed<br>1 x 30 mins<br>1 session                     | Pain intensity (NRS)                                                                                             | Pain interference with daily activities (NRS)                                                                                                                                                                                                                         |
| de Orange et al., 2003 <sup>92</sup>  | P | Pr | Labour pain                                        | 22 (22W)   | TENS (HF) + (Bupivacaine + Sufentanyl epidural) – 11                                       | Analgesic - (Bupivacaine + Sufentanyl epidural (SoC, no TENS) = 11                                  | PRN                                                   | Pain intensity (VAS)                                                                                             | Duration of labour<br>Frequency of hypoxia<br>Apgar score                                                                                                                                                                                                             |
| de Sousa et al., 2014 <sup>93</sup>   | P | E  | Post-partum uterine contraction pain               | 32 (32W)   | TENS (HF) = 16                                                                             | No treatment = 16                                                                                   | Fixed<br>40 mins during breast feeding<br>1 session   | Pain intensity (NRS)                                                                                             | Treatment satisfaction                                                                                                                                                                                                                                                |
| DeSantana et al., 2008 <sup>94</sup>  | P | Pr | Post-op – inguinal herniorrhaphy                   | 40 (0W)    | TENS (HF) + Metamizole (Dipyron) = 20                                                      | Placebo TENS (0mA) + Metamizole (Dipyron) = 20                                                      | Fixed<br>12 x 30 mins at 2h then 4h Post-op           | Pain intensity (NRS)<br>• Resting pain                                                                           | Analgesic consumption (Metamizole)<br>Nausea medication consumption<br>TENS-Related Questions                                                                                                                                                                         |
| DeSantana et al., 2009 <sup>95</sup>  | P | E  | Post-op – laparoscopic tubal ligation              | 64 (64W)   | TENS (HF) + medication (Ketoprofen, Hioscin plus Dipyron and Metochlopramide) = 23         | Placebo TENS + medication (Ketoprofen, Hioscin plus Dipyron and Metochlopramide) = 21 (0mA)         | Fixed<br>1 x 20min<br>1 sessions                      | Pain intensity (NRS)                                                                                             | McGill Pain Questionnaire                                                                                                                                                                                                                                             |

08\_OL-TABLE1\_IncludedStudies

|                                          |   |    |                                                                                 |           |                                                 |                                                                                         |                                                                               |                                                    |                                                                                                                                                                                                                                                                                      |
|------------------------------------------|---|----|---------------------------------------------------------------------------------|-----------|-------------------------------------------------|-----------------------------------------------------------------------------------------|-------------------------------------------------------------------------------|----------------------------------------------------|--------------------------------------------------------------------------------------------------------------------------------------------------------------------------------------------------------------------------------------------------------------------------------------|
|                                          |   |    |                                                                                 |           |                                                 | TENS (LF) + medication (Ketoprophen, Hioscin plus Dipyronne and Metochlopramide) = 20   |                                                                               |                                                    |                                                                                                                                                                                                                                                                                      |
| Dewan and Sharma, 2011 <sup>96</sup>     | P | Pr | Adhesive capsulitis                                                             | 50 (NR)   | TENS (HF) = 25                                  | IFT= 25                                                                                 | Fixed 1 x 20 mins x 2 to 3 / week x 4 weeks 10 sessions                       | Pain intensity (VAS)                               | Range of motion Constant Murley Assessment (CMA) score                                                                                                                                                                                                                               |
| Deyo et al. (1990 <sup>97</sup>          | P | Pr | Back pain – chronic, low, non-specific                                          | 125 (73)  | TENS (AF, HF, LF burst) = 31                    | Placebo TENS = 29 (0mA)<br>Placebo TENS + exercises = 29 (0mA)<br>TENS + exercises = 34 | Fixed 1 x 45 min x 3/day 3 sessions                                           | Pain intensity (VAS)                               | Pain improvement (6-point scale)<br>Pain improvement (VAS)<br>Pain frequency (5-point scale)<br>Sickness Impact profile<br>Level of activity (self-assessed 3 categories)<br>Straight leg raising test<br>Schober test<br>Use of medical providers                                   |
| Dibenedetto et al., 1993 <sup>98</sup>   | P | Pr | Fibromyalgia                                                                    | 30 (29W)  | TENS (HF) = 15                                  | S = Adenosyl-L methionine = 15                                                          | Fixed 1 x 20 mins / day at each of 4 MTPs 5 days / week x 6 weeks 30 sessions | Pain intensity (VAS)                               | Total tender point score<br>• Number<br>• Tenderness intensity (5-point scale)<br>Pressure pain threshold (algometry)<br>Hamilton Rating Scale for Depression<br>Fatigue, sleep, and well-being (VAS)<br>Laboratory tests (complete blood picture)<br>Overall evaluation of efficacy |
| Dilekci et al., 2016 <sup>99</sup>       | P | Pr | Tendinitis - Lateral epicondylitis                                              | 65 (43W)  | TENS (HF) + SoC including NSAIDs =30            | Standard of care (SoC, no TENS) = 30                                                    | Fixed 1 x 30 mins / day 10 sessions                                           | Pain intensity (VAS)<br>• At rest<br>• On movement | Patient-Rated Tennis Elbow Evaluation (PRTEE) questionnaire                                                                                                                                                                                                                          |
| Dissanayaka et al., 2016 <sup>100</sup>  | P | Pr | Myofascial pain – syndrome patients with up/ trapezius myofascial trigger point | 105 (58W) | TENS (HF) + SoC = 35                            | Standard care (SoC, no TENS) = 35<br>IFT+ standard care = 35                            | Fixed 1 x 20 mins x 2 / week x 4 weeks 8 sessions                             | Pain intensity (VAS)                               | Range of motion – cervical                                                                                                                                                                                                                                                           |
| Dogu et al., 2008 <sup>101</sup>         | P | Pr | Myofascial pain and temporomandibular disorders                                 | 30 (28W)  | TENS (HF) + rescue analgesic (paracetamol) = 14 | Occlusal splint (SoC) = 16                                                              | Fixed 1 x 30 mins / day x 5 days / week x 4 weeks 20 sessions.                | No pain intensity                                  | Pressure-pain threshold (algometry) during rest and functional activities Pain and range of motion<br>Quality of life both general and specific to masticatory functions SF-36                                                                                                       |
| Domaille and Reeves, 1997 <sup>102</sup> | P | E  | Post-op – coronary artery bypass                                                | 60 (0W)   | TENS (HF) + 1 mg morphine PCA = 31              | Placebo TENS+ 1 mg morphine PCA = 29 (0mA)                                              | Fixed 1 x 3h                                                                  | Pain intensity (VAS)                               | Analgesic consumption (Morphine) - PCA                                                                                                                                                                                                                                               |

08\_OL-TABLE1\_IncludedStudies

|                                                                 |   |    |                                                                                 |            |                                                                            |                                                                                                                           |                                                                                  |                                                                    |                                                                                                                     |
|-----------------------------------------------------------------|---|----|---------------------------------------------------------------------------------|------------|----------------------------------------------------------------------------|---------------------------------------------------------------------------------------------------------------------------|----------------------------------------------------------------------------------|--------------------------------------------------------------------|---------------------------------------------------------------------------------------------------------------------|
| Ebadi et al., 2018 <sup>103</sup>                               | P | E  | Back pain – chronic, low, non-specific                                          | 30 (15W)   | TENS (HF) = 15                                                             | Diadynamic = 15                                                                                                           | Fixed<br>1 x 15 mins                                                             | Pain intensity (VAS)                                               | Pressure pain threshold (algometry)<br>Depression Anxiety and Stress Scale (DASS)                                   |
| Ekblom and Hansson, 1987 <sup>104</sup>                         | C | E  | Oral – acute pain from teeth and/ or surrounding tissue                         | 40 (17W)   | TENS (HF) = 11                                                             | Placebo TENS = 5 (0mA)<br>TENS (LF) = 11<br>Vibration = 8<br>Placebo vibration = 5                                        | Fixed<br>1 x 30 mins<br>1 session                                                | Pain intensity (VAS)                                               | Thermal threshold (heat and cold)                                                                                   |
| Ekim et al., 2008 <sup>105</sup>                                | P | Pr | Hemiplegic Shoulder Pain                                                        | 19 (8W)    | TENS (HF) + Hemiplegia rehabilitation = 10                                 | Placebo TENS (0mA) + Hemiplegia rehabilitation = 9                                                                        | Fixed<br>1 x 20 minutes / day x 5 / week x 3 weeks<br>15 sessions                | Pain Intensity (VAS)                                               | Barthel Index<br>Range of motion - upper limb                                                                       |
| Elboim-Gabyzon et al., 2019 <sup>106</sup>                      | P | Pr | Post op - following Gamma-nail surgical fixation of extracapsular hip fractures | 41 (32W)   | TENS (HF) + SoC – physiotherapy = 23                                       | Placebo TENS (0mA) + SoC – physiotherapy = 18                                                                             | Fixed<br>1 x 30 mins / day x 5 days<br>5 sessions                                | Pain Intensity (NRS)<br>• rest<br>• during night during ambulation | Functional Ambulation Classification instrument<br>Time to complete five sit-to-stand tests<br>Two-minute walk test |
| Elserty et al., 2016 <sup>107</sup>                             | P | Pr | Back pain – chronic, low, non-specific                                          | 45 (31W)   | TENS (HF) + exercise = 15 (pulse amplitude adjusted every 5 mins, Group B) | Exercises only (SoC, no TENS, Group C) = 15<br>TENS + exercise = 15 (Fixed pulse amplitude, Group A)                      | Fixed<br>1 x 40 mins x 3 / week x 4 weeks                                        | Pain intensity (VAS)                                               | Oswestry Disability Index (ODI)<br>Lumbar range of motion (flexion and extension)                                   |
| Emmiller et al., 2008 <sup>108</sup>                            | P | Pr | Post-op – open cardiac operation                                                | 60 (18W)   | TENS (HF) + analgesia (pethidine and metamizole) = 20                      | Placebo TENS + analgesia (pethidine and metamizole) = 20 (0mA)<br>Analgesia (pethidine and metamizole (SoC, no TENS) = 20 | Fixed<br>1 x 60 mins then 60 mins rest then 1 x 60 mins                          | Pain intensity (VAS)                                               | Analgesic consumption                                                                                               |
| Engen et al., 2016 <sup>109</sup>                               | P | Pr | Post-op – video assisted thoracoscopic surgery                                  | 40 (23W)   | TENS (VF) + Opioids (morphine - oral) = 20                                 | Opioids (morphine - oral) (SoC, no TENS) = 20                                                                             | PRN for 48 hours after surgery                                                   | Pain intensity (VAS)                                               | Analgesic consumption (opioids + blocks)<br>Rating of physical status<br>TENS satisfaction and utility              |
| Erden and Senol Celik, 2015 <sup>110</sup>                      | P | Pr | Post-op -posterolateral thoracotomy                                             | 40 (10W)   | TENS (HF) + analgesics (tramadol / tamoxicam) = 20                         | No TENS + analgesics (tramadol / tamoxicam) (SoC, no TENS) = 20                                                           | Fixed<br>3 x 30 mins / day x 2 days then 2 x 30 mins / day                       | Pain intensity (VAS)<br>• Resting pain<br>• During cough           | Analgesic consumption (Opioid)                                                                                      |
| Erdogan et al., 2005 <sup>111</sup>                             | P | Pr | Post-op thoracotomy pain                                                        | 116 (46W)  | TENS (HF) + standard medication as needed) = 60                            | Placebo TENS (0mA) + standard medication as needed = 56                                                                   | PRN for 48 hours then 1 x 20 mins at 3-hour intervals for 2 days 5 days in total | Pain intensity (VAS)<br>• Resting pain<br>• During cough           | Analgesic consumption<br>Spirometric breath functions (FEV1 and FVC)<br>Blood gases (PaO2 and PaCO2)                |
| Erkkola et al., 1980 <sup>112</sup>                             | P | Pr | Labour pain                                                                     | 200 (200W) | TENS (NR) + meperidine = 100                                               | No TENS + meperidine (SoC, no TENS) = 100                                                                                 | PRN throughout delivery                                                          | Pain intensity (5-point categorical scale)                         | Pain questionnaire (no description)<br>Desire for analgesics                                                        |
| Escortell-Mayor et al., 2011 <sup>113</sup><br>Secondary Report | P | E  | Neck pain - chronic non-specific ('mechanical neck disorder')                   | 90 (80W)   | TENS (HF) + exercises and education = 43                                   | Manual therapy + exercises and education (SoC, no TENS) = 47                                                              | Fixed<br>1 x 30 mins / day every 2 days total 10 sessions                        | Pain intensity (VAS)                                               | Neck Disability Index<br>SF-12<br>Physical Component Summary (PSC-12)                                               |

08\_OL-TABLE1\_IncludedStudies

|                                              |   |    |                                          |            |                                                                                  |                                                                                                            |                                                                                   |                                                                                      |                                                                                                                                                        |
|----------------------------------------------|---|----|------------------------------------------|------------|----------------------------------------------------------------------------------|------------------------------------------------------------------------------------------------------------|-----------------------------------------------------------------------------------|--------------------------------------------------------------------------------------|--------------------------------------------------------------------------------------------------------------------------------------------------------|
| Escortell Mayor et al., 2008 <sup>114</sup>  |   |    |                                          |            |                                                                                  |                                                                                                            |                                                                                   |                                                                                      | Mental Component Summary (MCS-12)<br>Duration of crisis (days)<br>General Health Questionnaire-28                                                      |
| Esteban Gonzalez et al., 2015 <sup>115</sup> | P | Pr | Post-op - thoracotomy (shoulder pain)    | 50 (10W)   | TENS (HF) + analgesics (epidural - paracetamol and ibuprofen or metamizole) = 25 | Placebo TENS = 25 (0mA) + analgesics (epidural - paracetamol and ibuprofen or metamizole)                  | Fixed<br>1 x 30 mins every 8 hours x 3 days                                       | Pain intensity (VAS)<br>• on movement                                                | Range of motion                                                                                                                                        |
| Eyigor et al., 2008 <sup>116</sup>           | P | Pr | Osteoarthritis - Knee                    | 45(34W)    | TENS (HF) + superficial heat and exercise = 14                                   | Control - superficial heat and exercise (SoC, no TENS) = 15<br><br>US + superficial heat and exercise = 15 | Fixed<br>1 x 20 mins / day x 5 days / week x 3 weeks<br>15 sessions               | Pain intensity (VAS)                                                                 | 20-meter walking test<br>Lequesne index<br>WOMAC<br>Isokinetic muscle testing<br>SF 36                                                                 |
| Eyigor et al., 2010 <sup>117</sup>           | P | Pr | Tendinitis – rotator cuff                | 40 (29W)   | TENS (HF) + exercises (Codman) + Paracetamol = 20                                | Intra articular injection of corticosteroid (+ exercises (Codman) + Paracetamol) = 20                      | Fixed<br>5 x 30 mins / week for 3 weeks<br>15 sessions                            | Pain intensity (VAS)<br>• Resting pain                                               | Analgesic consumption (Paracetamol)<br>Range of motion<br>Shoulder disability questionnaire (SDQ)<br>Beck depression inventory<br>Doctors satisfaction |
| Facci et al., 2011 <sup>118</sup>            | P | Pr | Back pain – Chronic, low, non-specific   | 150 (109W) | TENS (HF) = 50                                                                   | No treatment (waiting list) = 50<br>IFT= 50                                                                | Fixed<br>1 x 30 mins / day x 5 days x 2 weeks<br>10 sessions                      | Pain intensity (VAS)                                                                 | McGill Pain Questionnaire<br>Analgesic consumption<br>Duration of pain relieve post intervention                                                       |
| Farahani et al., 2014 <sup>119</sup>         | P | E  | Headache – primary                       | 45 (20W)   | TENS (NR) = 15                                                                   | No treatment = 15<br>Neurofeedback behavioural therapy = 15                                                | Fixed<br>1 x 20 mins / day x 20 days<br><br>20 sessions                           | Pain intensity (? VAS – 100mm)                                                       | Frequency of pain<br>Duration of headache<br>Blanchard headache diary                                                                                  |
| Farina et al., 2004 <sup>120</sup>           | P | Pr | Upper trapezius Myofascial pain syndrome | 40 (30W)   | TENS (HF) = 21                                                                   | Frequency modulated neural stimulation = 19                                                                | Fixed<br>1 x 20 mins / day x 5 days / week x 2 weeks<br>10 sessions               | No pain intensity                                                                    | Disability (NPDVAS)<br>Myofascial trigger point characteristics<br>Pressure pain threshold (algometry).<br>Range of motion                             |
| Fatima and Sarfraz, 2019 <sup>121</sup>      | P | Pr | Post op - Caesarean                      | 50 (50W)   | TENS (HF) + exercises + analgesics as needed = 25                                | TENS (LF, 4Hz) + exercises + analgesics as needed = 25                                                     | Fixed<br>2 x 20 mins / day x 3 days<br>6 sessions                                 | Pain intensity (NRS)                                                                 | Analgesic consumption                                                                                                                                  |
| Ferraz and Moreira, 2009 <sup>122</sup>      | P | E  | Post-op - cardiac surgery                | 20 (6W)    | TENS (HF) = 10                                                                   | Placebo TENS = 10 (0mA)                                                                                    | Fixed<br>1 x 20 mins<br>1 session                                                 | Pain intensity (NRS)                                                                 | Analgesic consumption                                                                                                                                  |
| Ferreira et al., 2011 <sup>123</sup>         | P | E  | Post-op - thoracotomy                    | 30 (12W)   | TENS (HF) + fentanyl / bupivacaine = 15                                          | Placebo TENS (0mA) + fentanyl / bupivacaine = 15                                                           | Fixed<br>1 x 60 mins<br>1 h after epidural on second Post-op day<br><br>1 session | Pain intensity (VAS)<br>• Resting pain<br>• Changing decubitus<br>• Pain on movement | None                                                                                                                                                   |

08\_OL-TABLE1\_IncludedStudies

|                                         |   |    |                                                |          |                                                    |                                                                                                                                              |                                                                                                    |                                                          |                                                                                                                                                                                                                                                                                                                             |
|-----------------------------------------|---|----|------------------------------------------------|----------|----------------------------------------------------|----------------------------------------------------------------------------------------------------------------------------------------------|----------------------------------------------------------------------------------------------------|----------------------------------------------------------|-----------------------------------------------------------------------------------------------------------------------------------------------------------------------------------------------------------------------------------------------------------------------------------------------------------------------------|
|                                         |   |    |                                                |          |                                                    |                                                                                                                                              |                                                                                                    | • During cough                                           |                                                                                                                                                                                                                                                                                                                             |
| Ferreira et al., 2017 <sup>124</sup>    | P | E  | Temporomandibular disorder – chronic           | 40 (30W) | TENS (LF then HF) = 20                             | Placebo TENS = 20 (current fade away to 0mA after 40s)                                                                                       | Fixed 1 x 50 mins 1 session                                                                        | Pain intensity (VAS)                                     | Pressure pain threshold (algometry)<br>EMG activity                                                                                                                                                                                                                                                                         |
| Finsen et al., 1988 <sup>125</sup>      | P | Pr | Post-op - major amputation                     | 51 (24W) | TENS (LF) + analgesics (NR) = 17                   | Placebo TENS + analgesics (NR) = 19 (0mA)<br>Chlorpromazine + placebo TENS (0mA) + analgesics (NR) = 15                                      | Fixed 2 x 30 mins / day x 2 weeks<br>28 sessions                                                   | No primary outcome                                       | Analgesic consumption<br>Presence of phantom pain (tally of yes or no answers)                                                                                                                                                                                                                                              |
| Fiorelli et al., 2012 <sup>126</sup>    | P | Pr | Post-op - thoracotomy                          | 50 (19W) | TENS (HF) + morphine PCA = 25                      | Placebo TENS + morphine PCA = 25 (0mA)                                                                                                       | Fixed 1 x 30 mins at 4h intervals for first 48h then 2 x 30 mins / day from day 3-5<br>16 sessions | Pain intensity (VAS)                                     | Analgesic consumption (morphine-PCA)<br>Serum cytokines measurements<br>Respiratory function (FVC, FEV 1)                                                                                                                                                                                                                   |
| Fodor-Sertl et al., 1990 <sup>127</sup> | P | Pr | Post-op - thoracotomy                          | 40 (7W)  | TENS (HF, segmental) + medication = 16             | Placebo TENS (non-segmental, placebo control) + analgesic medication = 18                                                                    | Fixed 15-30 mins 6 post-operative days                                                             | No primary outcomes                                      | Analgesic consumption                                                                                                                                                                                                                                                                                                       |
| Forogh et al., 2019 <sup>128</sup>      | P | Pr | Rehabilitation – following ACL surgery         | 70 (0W)  | TENS (HF) + exercise = 35                          | Exercise (SoC, no TENS) = 35                                                                                                                 | Fixed 1 x 35 mins / day x 5 days / week x 4 weeks<br>20 sessions                                   | Pain intensity (VAS)                                     | International knee documentation committee (IKDC) questionnaire<br>Range of motion                                                                                                                                                                                                                                          |
| Forst et al., 2004 <sup>129</sup>       | P | Pr | Peripheral diabetic neuropathy                 | 19 (9W)  | TENS (LF) = 12                                     | Placebo TENS = 7 (0mA)                                                                                                                       | PRN >30 mins / day /leg for 12 weeks                                                               | Pain intensity (VAS)                                     | New total symptom score (NTSS = 6)<br>Sensory nerve threshold (temperature, vibration, pain)<br>Neuropathy total symptom score-6 (NTSS - 6)<br>Intensity of dysaesthesia, hypaesthesia and muscle weakness (VAS)<br>Peripheral nerve function – vibration perception and temperature thresholds<br>Microvascular blood flow |
| Forster et al., 1994 <sup>130</sup>     | P | Pr | Post-op - coronary artery bypass graft surgery | 45 (0W)  | TENS (HF) + Analgesics (morphine/paracetamol) = 15 | Placebo TENS Analgesics (morphine/paracetamol) = 15 (0mA)<br>Control Analgesics (morphine/paracetamol), (SoC, no TENS) = 15 (no description) | PRN up to 72 hours post op                                                                         | Pain intensity (NRS)<br>• Resting pain<br>• During cough | Analgesic consumption (Narcotic)                                                                                                                                                                                                                                                                                            |
| Fujii-Abe et al., 2019 <sup>131</sup>   | P | E  | Post-op – Wisdom tooth extraction              | 44 (23W) | HF TENS (non-noxious) = 11                         | Placebo TENS (0mA) = 11<br>TENS (noxious, conditioned pain modulation) = 11<br>Combined TENS (non-noxious + noxious) = 11                    | Fixed 1 x 20 mins                                                                                  | Pain intensity (VAS)                                     | None                                                                                                                                                                                                                                                                                                                        |
| Galli et al., 2015 <sup>132</sup>       | P | E  | Post-op - nephrectomy                          | 74 (39W) | TENS (HF) + analgesics (unknown) = 37              | Placebo TENS (fading) + analgesics (unknown) = 37                                                                                            | Fixed 1 x 60 mins                                                                                  | Pain intensity (NRS)<br>• Resting pain                   | Respiratory muscle strength<br>Pulmonary function<br>Walk function                                                                                                                                                                                                                                                          |



08\_OL-TABLE1\_IncludedStudies

|                                           |   |    |                                               |          |                                                      |                                                                                                                                                                                                           |                                                                                             |                                                                                                                                |                                                                                                                                                             |
|-------------------------------------------|---|----|-----------------------------------------------|----------|------------------------------------------------------|-----------------------------------------------------------------------------------------------------------------------------------------------------------------------------------------------------------|---------------------------------------------------------------------------------------------|--------------------------------------------------------------------------------------------------------------------------------|-------------------------------------------------------------------------------------------------------------------------------------------------------------|
|                                           |   |    |                                               |          |                                                      |                                                                                                                                                                                                           |                                                                                             | <ul style="list-style-type: none"> <li>• During cough</li> <li>• During pulmonary testing</li> <li>• During walking</li> </ul> |                                                                                                                                                             |
| Galloway et al., 1984 <sup>133</sup>      | P | Pr | Post-op - abdominal                           | 40 (30W) | TENS (PRN) + analgesic (Cyclimorph) as required = 14 | No treatment (SoC, no TENS) + analgesic (Cyclimorph) as required = 14<br>TENS + analgesic Ccyclimorph) as required = 12<br>(Remote – non = segmental)                                                     | PRN for 48 hours                                                                            | Pain intensity (VAS, Likert scale)                                                                                             | Analgesic consumption<br>Wound pain discomfort (VAS)                                                                                                        |
| Garcia-Perez et al., 2018 <sup>134</sup>  | P | Pr | Pressure ulcers (injury)                      | 17 (15W) | TENS (HF) + standard wound care = 9                  | Standard wound care (SoC, no TENS) = 8                                                                                                                                                                    | Fixed 1 x 60 mins / day x 3 weeks total 20 sessions                                         | No primary outcome                                                                                                             | Pressure injury area<br>Pressure injury healing rate<br>Blood flow in affected lower limb<br>Skin temperature<br>Pain Assessment in Advanced Dementia Scale |
| Gerson et al., 1977 <sup>135</sup>        | C | E  | Post herpetic neuralgia                       | 29 (NR)  | TENS (NR) = 13                                       | Carbamazepine + Clomipramine = 16                                                                                                                                                                         | Fixed 1 x 15 mins / week x 4 weeks then one x 15 mins put 2 weeks x 6 weeks ? x 8 weeks too | Pain intensity (VAS).                                                                                                          | Analgesic consumption<br>Plasma concentrations of drugs<br>Physical activity and mental outlook (VAS)                                                       |
| Ghonomie et al., 1999 <sup>136</sup>      | C | E  | Back pain - low                               | 60 (31W) | TENS (LF) + analgesics (non-opioid) as required = 60 | Placebo PENS (0mA) + analgesics as required = =64<br>PENS + analgesics as required = = 64<br>Exercise therapies + analgesics as required = (SoC, no TENS) = 64                                            | Fixed 1 x 30 mins x 3 / week x 3 weeks 9 sessions                                           | Pain intensity (VAS)                                                                                                           | Analgesic consumption SF-36<br>Physical component summary<br>Mental component summary<br>Quality of sleep<br>Well-being)                                    |
| Ghonomie et al., 1999 <sup>137</sup>      | C | E  | Back pain - Sciatica                          | 64 (34W) | TENS (LF) + analgesics (non-opioid) as required = 64 | Placebo PENS + analgesics as required (0mA) = 64<br>PENS + analgesics as required = 64                                                                                                                    | Fixed 1 x 30 mins / day x 3 weeks 21 sessions                                               | Pain intensity (VAS)                                                                                                           | Analgesic consumption SF-36<br>Physical activity and quality of sleep during the 24 h interval prior to each treatment session (VAS)                        |
| Gilbert et al., 1986 <sup>138</sup>       | P | Pr | Post-op - inguinal herniorrhaphy              | 40 (0W)  | TENS (HF) + Pethidine as required = 20               | Placebo TENS + Pethidine as required = 20 (0mA)                                                                                                                                                           | PRN                                                                                         | Pain intensity (VAS)                                                                                                           | Analgesic consumption (Pethidine)<br>Expiratory peak flow                                                                                                   |
| Grabianska et al., 2015 <sup>139</sup>    | P | Pr | Back pain low                                 | 60 (NR)  | TENS (HF) = 30                                       | IFT = 30                                                                                                                                                                                                  | Fixed 10 x 20 mins / day                                                                    | Pain intensity (VAS)                                                                                                           | Laitinen Pain Questionnaire                                                                                                                                 |
| Graff-Radford et al., 1989 <sup>140</sup> | P | E  | Myofascial pain and trigger point sensitivity | 60 (45W) | TENS (HF) =12                                        | Sham Control (Staadynamics unit or Pain Suppressor unit. 0mA). =12<br>TENS (LF, 2hz, 250us, >MDT) = 12<br>TENS (HF, 50us, SBC) = 12<br>TENS (Pain Suppressor, 4mA, 15Hz burst of 20Khz ,active <SDT) = 12 | Fixed 1 x 30 mins 1 session                                                                 | Pain intensity (VAS)                                                                                                           | Pressure algometry                                                                                                                                          |
| Grant et al., 1999 <sup>141</sup>         | P | E  | Back pain                                     | 60 (54W) | TENS (HF) = 28                                       | Acupuncture = 32                                                                                                                                                                                          | PRN                                                                                         | Pain intensity (VAS)                                                                                                           | Analgesic consumption<br>Pain subscale of Nottingham Health Profile                                                                                         |

08\_OL-TABLE1\_IncludedStudies

|                                            |   |    |                                                      |            |                                          |                                                                                                                  |                                                                                         |                                                  |                                                                                                                                                                                                                           |
|--------------------------------------------|---|----|------------------------------------------------------|------------|------------------------------------------|------------------------------------------------------------------------------------------------------------------|-----------------------------------------------------------------------------------------|--------------------------------------------------|---------------------------------------------------------------------------------------------------------------------------------------------------------------------------------------------------------------------------|
|                                            |   |    |                                                      |            |                                          |                                                                                                                  | 1 x <30 mins / session and < 6h / day for 4 weeks                                       |                                                  | Spinal flexion measured from C7 to S1                                                                                                                                                                                     |
| Gregorini et al., 2010 <sup>142</sup>      | P | E  | Post-op - cardiac surgery                            | 25 (7W)    | TENS (HF) = 13                           | Placebo TENS (>SDT – infrequent pulses) = 12                                                                     | Fixed<br>1 x 4 hours ?? on 3rd post-op day                                              | Pain intensity (VAS)                             | Respiratory muscle strength<br>Lung volumes and capacity                                                                                                                                                                  |
| Grimmer, 1992 <sup>143</sup>               | P | E  | Osteoarthritis - knee                                | 60 (37W)   | TENS (HF) = 20                           | Placebo TENS = 20 (0mA)<br>TENS (LF, burst) = 20                                                                 | Fixed<br>1 x 30 mins<br>1 session                                                       | Pain intensity (VAS)                             | Stiffness change (VAS)<br>Pain relief time (in hours)<br>Stiffness relief time (hours)<br>Change on knee circumference<br>Change in knee range of motion<br>Physiological respiratory rate, heart rate and blood pressure |
| Gschiel et al., 2010 <sup>144</sup>        | P | Pr | Osteoarthritis – knee (gonarthrosis)                 | 45 (32W)   | TENS (AF) = 25                           | Placebo TENS (0mA) = 20                                                                                          | PRN<br>>2 x 30 mins / day for 3-weeks                                                   | Pain intensity (VAS)                             | SF-36<br>WOMAC<br>Lysholm score                                                                                                                                                                                           |
| Gunay Ucurum et al., 2018 <sup>145</sup>   | P | Pr | Shoulder impingement syndrome                        | 79 (65W)   | TENS (NR) + exercise = 20                | Exercise (SoC, no TENS) = 19<br>IFT + Exercise = 20<br>US + Exercise = 20                                        | Fixed<br>1 x ?? mins x 3 / week x 4 weeks<br>12 sessions                                | Pain intensity (VAS)                             | Short Form-36 (SF-36)<br>Disabilities of the Arm, Shoulder and Hand questionnaire (DASH)                                                                                                                                  |
| Guo and Jia, 2005 <sup>146</sup>           | P | Pr | Fibromyalgia                                         | 66 (45W)   | TENS (HF) = 22                           | Routine medication (SoC, no TENS) = 22<br>EA = 22                                                                | Fixed<br>1 x 30 mins / day for 20 days [repeated for another 20 days]<br>?? 40 sessions | Pain intensity (VAS)                             | Analgesic consumption                                                                                                                                                                                                     |
| Hamza et al., 1999 <sup>147</sup>          | P | Pr | Post-op - gynaecological                             | 100 (100W) | TENS (HF) + morphine PCA = 25            | Placebo TENS + morphine PCA = 25 (0mA)<br>TENS (LF) + morphine PCA = 25<br>TENS (AF) + morphine PCA = 25         | Fixed<br>1 x 30 mins at intervals of 2 h or longer while patient awake                  | Pain intensity (VAS)                             | Analgesic consumption (PCA morphine)<br>levels of sedation, fatigue, discomfort and nausea                                                                                                                                |
| Hanfy and El-Bigawy, 2004 <sup>148</sup>   | P | Pr | Dysmenorrhea – primary                               | 30 (30W)   | TENS (HF) = 15                           | Acupressure = 15                                                                                                 | Fixed<br>1 x 20 mins x 3 days x 3 menstrual cycles                                      | Pain intensity (6-point scale)                   | Pain relief (5-point scale)                                                                                                                                                                                               |
| Hansson and Ekblom, 1983 <sup>149</sup>    | C | E  | Orofacial pain – acute                               | 62 (36W)   | TENS (HF) = 22                           | Placebo TENS (0mA) = 20<br>TENS (LF, burst) = 20                                                                 | Fixed<br>1 x 30 mins<br>1 session                                                       | Pain intensity (5-point verbal scale)            | None                                                                                                                                                                                                                      |
| Hansson et al., 1986 <sup>150</sup>        | P | E  | Post-op - oral                                       | 28 (16W)   | TENS (HF) + naloxone = 6                 | TENS (LF, burst) + naloxone = 7<br>Vibration + Naloxone = 7<br>Naloxone = 8                                      | Fixed<br>1 x 45 mins<br>1 session                                                       | Pain intensity (5-point verbal scale)            | None                                                                                                                                                                                                                      |
| Hargreaves and Lander, 1989 <sup>151</sup> | P | E  | Post-op dressing changes following abdominal surgery | 75 (34W)   | TENS (HF) + meperidine and morphine = 25 | Placebo TENS (0mA) + meperidine and morphine = 25<br>No treatment (+ meperidine and morphine, SoC, no TENS) = 25 | Fixed<br>1 x 15 to 60 mins depending on duration of dressing change<br>1 session        | Pain intensity (VAS)<br>• During dressing change | Analgesic consumption (prescription and administration)                                                                                                                                                                   |
| Harrison et al., 1986 <sup>152</sup>       | P | Pr | Labour pain                                          | 150 (150W) | TENS (HF+LF burst) = 76                  | Placebo TENS = 73 (0mA)                                                                                          | PRN<br>During labour                                                                    | Pain intensity (5-point scale)                   | Analgesic consumption<br>Hours pf labour<br>Mode of delivery<br>Pain relief reported by the midwife (5-point scale)                                                                                                       |

08\_OL-TABLE1\_IncludedStudies

|                                           |   |    |                                                         |           |                                                               |                                                                                                                                                                                                                                                                                                                                      |                                                              |                                                                  |                                                                                                                                                                                                                                                      |
|-------------------------------------------|---|----|---------------------------------------------------------|-----------|---------------------------------------------------------------|--------------------------------------------------------------------------------------------------------------------------------------------------------------------------------------------------------------------------------------------------------------------------------------------------------------------------------------|--------------------------------------------------------------|------------------------------------------------------------------|------------------------------------------------------------------------------------------------------------------------------------------------------------------------------------------------------------------------------------------------------|
| Hart et al., 2012 <sup>153</sup>          | P | Pr | Rehabilitation - Anterior cruciate ligament             | 30 (10W)  | TENS (HF) + exercise = 10                                     | Exercise alone (SoC, no TENS) = 10<br>Cryotherapy + Exercise = 10                                                                                                                                                                                                                                                                    | PRN<br>Daily x 2 weeks and during in clinic exercise session | Pain intensity (VAS)                                             | Various functional outcomes for knee<br>Tegner activity rating<br>International Knee Documentation Committee subjective knee evaluation form.<br>Circumferential girth (measured at mid-patella)<br>Range of motion<br>Quadriceps central activation |
| Hazneci et al., 2005 <sup>154</sup>       | P | Pr | CRPS - reflex sympathetic dystrophy syndrome upper limb | 30 (0W)   | TENS (HF) +, contrast bathing and exercise programme = 16     | Pulsed US on stellate ganglion + contrast bathing and exercise programme = 14                                                                                                                                                                                                                                                        | Fixed<br>1 x 20 mins / day for 3 weeks<br>21 sessions        | Pain intensity (???)<br>• spontaneous pain<br>• provocative pain | Loss of mobility, muscle power<br>Oedema                                                                                                                                                                                                             |
| Herrera-Lasso et al., 1993 <sup>155</sup> | P | Pr | Shoulder – painful syndrome                             | 29 (23W)  | TENS (HF) + Exercises + Heat (superficial) = 15               | US + Exercises + Heat (superficial) = 14                                                                                                                                                                                                                                                                                             | Fixed<br>1 x 20 mins / day x 2-5 / week<br>13 sessions       | Pain intensity (VAS)                                             | Range of motion                                                                                                                                                                                                                                      |
| Hershman, 1989 <sup>156</sup>             | P | Pr | Post op - colorectal or cholecystectomy                 | 95 (47W)  | TENS (HF) + omnopon (opiate) = 48                             | Placebo TENS + omnopon (opiate) (0mA) = 47                                                                                                                                                                                                                                                                                           | PRN<br>48h post-operative                                    | No primary outcome                                               | Analgesic consumption - Opiate<br>Anti- emetic consumption<br>Duration of hospital stay                                                                                                                                                              |
| Hokenek et al., 2020 <sup>157</sup>       | P | Pr | Migraine – presenting to emergency department           | 83 (NR)   | TENS (HF) + rescue medication = 39                            | Placebo TENS (0mA) + rescue medication = 39                                                                                                                                                                                                                                                                                          | Fixed<br>1 x 20mins                                          | Pain intensity (VAS)                                             | Analgesic consumption                                                                                                                                                                                                                                |
| Hou et al., 2002 <sup>158</sup>           | P | E  | Cervical Myofascial Pain and Trigger Point Sensitivity  | 71 (59W)  | TENS (HF) + hot pack active ROM + stretch with spray (B5) = 9 | Hot pack + active ROM + stretch with spray (SoC, no TENS) (B4) = 10<br>Ischemic compression + TENS (HF) + hot pack + active range of motion + = 9<br>Hot pack + active range of motion + ischemic compression = 12<br>Hot pack + active range of motion = 21<br>IFT+ myofascial release + Hot pack + active range of motion (B6) = 9 | Fixed<br>1 x 20 mins<br>1 session                            | Pain intensity (VAS)                                             | Pressure pain threshold and tolerance (algometry)<br>Range of motion                                                                                                                                                                                 |
| Hruby et al., 2006 <sup>159</sup>         | P | Pr | Procedure pain - Office-based flexible cystoscopy       | 148 (40W) | TENS (HF) = 48                                                | Placebo TENS (0mA) = 49<br>No treatment (no analgesics) = 51                                                                                                                                                                                                                                                                         | Fixed<br>< 5min During procedure<br>1 session                | Pain intensity (VAS)                                             | International Prostate Symptom Score questionnaire<br>Changes in vital signs and IPSS                                                                                                                                                                |
| Hsieh and Lee, 2002 <sup>160</sup>        | P | E  | Back pain - chronic low non-specific                    | 133 (89W) | TENS + Medication = 49                                        | Medication - Diclofenac (NSAID), mephenoxalone (muscle relaxant) and antacid (SoC, no TENS) = 31<br>PENS + medication = 53                                                                                                                                                                                                           | Fixed<br>1 x 15 mins<br>1 session                            | Pain intensity (VAS)                                             | Pain drawing instrument<br>Pressure pain threshold (algometry)<br>Quebec Back Pain Disability scale                                                                                                                                                  |
| Hsueh et al., 1997 <sup>161</sup>         | P | E  | Myofascial trigger points                               | 60 (35W)  | TENS (HF) = 20                                                | Placebo electrotherapy (0mA) = 18                                                                                                                                                                                                                                                                                                    | Fixed<br>1 x 20 mins                                         | Pain intensity (VAS)                                             | Pressure algometry (pain threshold)                                                                                                                                                                                                                  |

08\_OL-TABLE1\_IncludedStudies

|                                        |   |    |                                                   |            |                                                             |                                                                                                                           |                                                                               |                                                              |                                                                                                                                                                                                                                                         |
|----------------------------------------|---|----|---------------------------------------------------|------------|-------------------------------------------------------------|---------------------------------------------------------------------------------------------------------------------------|-------------------------------------------------------------------------------|--------------------------------------------------------------|---------------------------------------------------------------------------------------------------------------------------------------------------------------------------------------------------------------------------------------------------------|
|                                        |   |    |                                                   |            |                                                             | Functional electrical muscle stimulation = 22                                                                             | 1 session                                                                     |                                                              | Range of motion                                                                                                                                                                                                                                         |
| Hughes et al., 1988 <sup>162</sup>     | P | Pr | Labour pain                                       | 89 (89W)   | TENS (NR) + opioids rescue = 29                             | Placebo TENS (0mA) + opioids rescue = 30<br>Conventional medication, opioids (SoC, no TENS) = 30                          | PRN<br>24h                                                                    | Pain intensity (VAS)                                         | Analgesic consumption<br>Pain relief (5-point category rank scale)<br>Infant condition<br>Apgar                                                                                                                                                         |
| Husch et al., 2020 <sup>163</sup>      | P | Pr | Post op - thoracotomy                             | 45 (25W)   | TENS (HF) + physiotherapy + analgesics = 15                 | Placebo TENS (fading to 0mA) + physiotherapy + analgesics = 15<br>Control (SoC, physiotherapy) + analgesics = 15          | Fixed<br>3 x 30 mins / day x 2 days<br>6 sessions                             | Pain intensity (VAS)                                         | Analgesic consumption<br>Pulmonary function, respiratory muscle strength                                                                                                                                                                                |
| Ilhanli, 2015 <sup>164</sup>           | P | Pr | chronic low back pain with lumbar disc herniation | 160 (108W) | Conventional TENS (HF)<br>Hot pack, ultrasound and exercise | Group1= Group2= Acupuncture-like TENS, Group3= Brief-intense TENS, Group4= Sham TENS.                                     | Fixed<br>5 days/week for 3 weeks                                              | Pain intensity (VAS)<br><br>Rest Movement                    | Ostwestry<br>Low Back Pain Disability Questionnaire<br>Short-Form 36 physical component<br>Mental component Scores<br>Modified Lumbar Schober test, Straight Leg Raising test and Femoral Stretching test                                               |
| Inal et al., 2016 <sup>165</sup>       | P | Pr | Osteoarthritis - knee                             | 90 (90W)   | TENS (HF) + physiotherapy (hot pack, US, exercise) = 30     | Placebo TENS (0mA) + physiotherapy (hot pack, US, exercise) = 30<br>TENS (LF) physiotherapy (hot pack, US, exercise) = 30 | Fixed<br>1 x 20 mins / day x 5 weeks<br>35 sessions                           | Pain intensity (VAS)<br>• Resting pain<br>• Pain on movement | WOMAC<br>Walking speed (50 metres)<br>Climbing stairs speed (ten stairs)                                                                                                                                                                                |
| Isik et al., 2017 <sup>166</sup>       | P | Pr | Osteoarthritis - knee                             | 105 (80W)  | TENS (HF) = 53                                              | Leech therapy = 52                                                                                                        | Fixed<br>1 x 20min / day x 5 days / week x 3 weeks (in clinic)<br>15 sessions | Pain intensity (VAS)                                         | WOMAC                                                                                                                                                                                                                                                   |
| Jaafarpour et al., 2008 <sup>167</sup> | P | Pr | Post-op - caesarean                               | 108 (108W) | TENS (MF) = 54                                              | Placebo TENS (0mA) = 54                                                                                                   | PRN<br>24h continuous                                                         | Pain intensity (VAS)                                         | Analgesic consumption                                                                                                                                                                                                                                   |
| Jamison et al., 2019 <sup>168</sup>    | P | Pr | Back pain - chronic low non-specific              | 68 (41W)   | TENS (HF) = 35                                              | Usual treatment (SoC, no TENS) = 33                                                                                       | PRN<br>daily x 3 months                                                       | Pain intensity (NRS)<br>• Current pain<br>• Average pain     | Pressure algometry (PPT)<br>Quantitative sensory testing<br>Anxiety, depression, and irritability (NRS)<br>Brief Pain Inventory<br>Pain Disability Inventory (PDI)<br>Pain Catastrophizing Scale (PCS)<br>Hospital Anxiety and Depression Scale (HADS). |
| Jarzem et al., 2005 <sup>169</sup>     | C | E  | Back pain - chronic low non-specific              | 50 (21W)   | TENS (NR, conventional) = 25                                | Placebo TENS (0mA) = 25                                                                                                   | Fixed<br>3 x 20 mins<br>3 sessions                                            | Pain intensity (VAS)                                         | Range of motion<br>Straight leg raising<br>Sit-ups and oblique sit-ups                                                                                                                                                                                  |
| Jensen et al., 1985 <sup>170</sup>     | P | Pr | Arthroscopic knee surgery                         | 90 (18W)   | TENS (HF) = 30                                              | Placebo TENS (0mA) = 30<br>Analgesic (SoC, no TENS control) = 30                                                          | PRN<br>< 7 days - discontinuation day measured                                | Pain intensity (6-point category scale)                      | Analgesic consumption<br>Medicine rating<br>Range of motion<br>Isokinetic muscle examination<br>Leg volume                                                                                                                                              |

08\_OL-TABLE1\_IncludedStudies

|                                              |   |    |                                                                                                                                                                                   |                                        |                                                                 |                                                                                                                                                                                                                           |                                                                 |                                                                                                               |                                                                                                                                                                           |
|----------------------------------------------|---|----|-----------------------------------------------------------------------------------------------------------------------------------------------------------------------------------|----------------------------------------|-----------------------------------------------------------------|---------------------------------------------------------------------------------------------------------------------------------------------------------------------------------------------------------------------------|-----------------------------------------------------------------|---------------------------------------------------------------------------------------------------------------|---------------------------------------------------------------------------------------------------------------------------------------------------------------------------|
| Jensen et al., 1991 <sup>171</sup>           | P | Pr | Osteoarthritis - knee                                                                                                                                                             | 20 (18W)                               | TENS (HF) = 10                                                  | TENS (LF) = 10                                                                                                                                                                                                            | Fixed<br>1 x 30 mins / day x 5<br>days<br>5 sessions            | Pain intensity (4-<br>point Likert scale)<br>• Resting pain<br>• Pain on<br>movement<br>• Exercise<br>induced | Analgesic consumption (NSAID)                                                                                                                                             |
| Jones and Hutchinson,<br>1991 <sup>172</sup> | C | E  | Post-op pain –<br>abdominal                                                                                                                                                       | 31 (16W)                               | TENS (HF, Para incision) +<br>physiotherapy = 31                | Placebo TENS ('modified placebo'<br>remote site, leg) + physiotherapy =<br>31<br>Entonox + physiotherapy = 31                                                                                                             | Fixed<br>1 x 20 mins<br>1 session                               | Pain intensity<br>(VAS)                                                                                       | Respiratory function<br>Peak expiratory flow rate                                                                                                                         |
| Kara et al., 2011 <sup>173</sup>             | P | Pr | Post-op spinal surgery                                                                                                                                                            | 54 (28W)                               | TENS (AF,) + Meperidine<br>PCA = 25                             | Meperidine PCA (SoC, no TENS<br>control) = 29                                                                                                                                                                             | Fixed<br>2 x 30-<br>40 mins with a 3 to<br>4-hour rest interval | Pain intensity<br>(VAS)<br>• Resting pain<br>• Pain on<br>movement                                            | Analgesic consumption<br>Beck Depression Inventory<br>Timed Up and Go (TUG) test                                                                                          |
| Kararmaz et al., 2004 <sup>174</sup>         | P | Pr | Procedural pain -<br>during extracorporeal<br>shock wave lithotripsy                                                                                                              | 66 (42W)                               | TENS (HF, conventional) =<br>22                                 | Placebo TENS (active, <SDT) = 22<br>TENS (LF, acupuncture-like) = 22                                                                                                                                                      | Fixed<br>~45-60mins<br>throughout the<br>procedure<br>1 session | Pain intensity<br>(VAS)                                                                                       | Analgesic consumption<br>(Alfentanil)<br>Nausea and vomiting (tally of<br>yes/no)<br>Aldrete score<br>Patients' satisfaction (4-point<br>scale)                           |
| Kayman-Kose et al.,<br>2014 <sup>175</sup>   | P | E  | Post-partum pain<br>following<br>(a) Caesarean section –<br>post operative pain +<br>uterine contractions<br>(b) Vaginal delivery –<br>post trauma pain +<br>uterine contractions | (a) = 50<br>(50W)<br>(b) = 50<br>(50W) | (a) TENS (HF) = 50<br>(b) TENS (HF) = 50                        | (a) Placebo TENS (0mA) = 50<br>(b) Placebo TENS (0mA) = 50                                                                                                                                                                | Fixed<br>1 x 30min<br>1 session                                 | Pain intensity<br>(VAS and verbal<br>rating scale)                                                            | Analgesic consumption                                                                                                                                                     |
| Keskin et al., 2012 <sup>176</sup>           | P | Pr | Back pain – low,<br>pregnancy-related                                                                                                                                             | 79 (79W)                               | TENS (HF) = 20                                                  | Control group (no treatment<br>control) = 21<br>Exercise (SoC) = 19<br>Acetaminophen = 19                                                                                                                                 | 2 x ? mins / week x<br>3 weeks                                  | Pain intensity<br>(VAS)                                                                                       | Roland Morris Disability<br>Questionnaire                                                                                                                                 |
| Kibar et al., 2020 <sup>177</sup>            | P | Pr | Back pain - chronic low<br>non-specific                                                                                                                                           | 123<br>(87W)                           | TENS (HF) + hot pack +<br>exercise + rescue<br>paracetamol = 31 | Placebo TENS (Sham TENS/IFT<br>device, 0mA) + hot pack + exercise<br>+ rescue paracetamol = 30<br>IFT + hot pack + exercise + rescue<br>paracetamol = 30<br>TENS + IFT + hot pack + exercise<br>+ rescue paracetamol = 32 | 1 x 30 mins / day x 5<br>/ week x 3 weeks<br>15 sessions        | Pain intensity<br>(VAS)<br>• During activity                                                                  | Lumbar range of motion (ROM)<br>via inclinometer and modified<br>Schober test, patient<br>and physician global assessments.<br>Rolland-Morris Disability<br>Questionnaire |
| Kim et al., 2012 <sup>178</sup>              | P | E  | Pain during venous<br>cannulation                                                                                                                                                 | 100<br>(60W)                           | TENS (HF) = 50                                                  | Placebo TENS (0mA) = 50                                                                                                                                                                                                   | Fixed<br>1 x 20 min before<br>cannulation<br>1 session          | Pain intensity<br>(NRS)                                                                                       | Adverse effects                                                                                                                                                           |
| Kim et al., 2014 <sup>179</sup>              | P | Pr | Myofascial pain<br>syndrome<br>Mixed                                                                                                                                              | 99 (86W)                               | TENS (NR) + Ketoprofen<br>(NSAID) patch = 24                    | Ketoprofen (NSAID) patch (SoC) =<br>25                                                                                                                                                                                    | Fixed<br>2 x 20 mins / day x 2<br>weeks                         | Pain intensity<br>(NRS)                                                                                       | Active range of motion<br>Pressure pain threshold<br>(algometry)                                                                                                          |

08\_OL-TABLE1\_IncludedStudies

|                                       |   |    |                                      |            |                                    |                                                                                                   |                                                                                 |                                                                                                                                          |                                                                                                                                                      |
|---------------------------------------|---|----|--------------------------------------|------------|------------------------------------|---------------------------------------------------------------------------------------------------|---------------------------------------------------------------------------------|------------------------------------------------------------------------------------------------------------------------------------------|------------------------------------------------------------------------------------------------------------------------------------------------------|
|                                       |   |    |                                      |            |                                    | Heating pad + ketoprofen (NSAID) patch = 25<br>Topical capsaicin + ketoprofen (NSAID) patch = 25  | 28 sessions                                                                     |                                                                                                                                          | Neck Disability Index (NDI)<br>Safety                                                                                                                |
| Kirupa et al., 2019 <sup>180</sup>    | P | Pr | Temporomandibular joint              | 30 (NR)    | TENS (HF) = 15                     | Ultrasound = 15                                                                                   | Fixed<br>1 x 15 mins / day x unclear /week x 4 weeks<br>? 10 sessions           | Pain intensity (VAS)                                                                                                                     | None                                                                                                                                                 |
| Knobel et al., 2005 <sup>181</sup>    | P | Pr | Labour pain                          | 60 (60W)   | TENS (HF, 'tablet electrode') = 20 | Placebo TENS (0mA) = 20<br>TENS using silver spike point electrode = 20                           | PRN<br>1 x 120 mins                                                             | Pain intensity (VAS)                                                                                                                     | Analgesic consumption<br>Epidural analgesia<br>Pain relief (calculated from pain intensity (VAS)<br>Discomfort (NR)                                  |
| Koca et al., 2014 <sup>182</sup>      | P | Pr | Carpal tunnel syndrome               | 75 (43W)   | TENS (HF) = 25                     | IFT = 25<br>Splint therapy = 25                                                                   | Fixed<br>1 x 20 mins / day x 5 days / week x 3 weeks<br>15 sessions             | Pain intensity (VAS)                                                                                                                     | Symptom severity scale<br>BCTQ<br>Neurophysiology (median motor nerve latency and sensory nerve conduction velocity)                                 |
| Kofotolis et al., 2008 <sup>183</sup> | P | Pr | Back pain - chronic low non-specific | 92 (92W)   | TENS (LF) = 23                     | Placebo TENS (0mA) = 23<br>Rhythmic stabilisation = 23<br>TENS (LF) + Rhythmic stabilisation = 23 | Fixed<br>1 x 40-45 mins x 5 days/week x 4 weeks<br>20 sessions                  | Pain intensity (VAS/BORG)                                                                                                                | Physical activity questionnaire<br>Oswestry Low Back Pain Disability Questionnaire<br>Range of motion<br>Flexion and extension trunk endurance tests |
| Koke et al., 2004 <sup>184</sup>      | C | Pr | Chronic pain                         | 180 (116W) | TENS (HF, HI, >SDT) = 62           | Control (HF, intensity of choice) = 60<br>TENS (HF, LI, SDT) = 58                                 | PRN<br>30 mins (HI) or 60 mins (LI) 4 to 6 times / day x 2 weeks<br>56 sessions | Pain intensity (VAS)                                                                                                                     | Desire to continue (TENS continuation questionnaire)                                                                                                 |
| Korkmaz et al., 2010 <sup>185</sup>   | P | Pr | Shoulder pain                        | 40 (28W)   | TENS (HF) + exercise = 20          | Pulsed radiofrequency + exercise = 20                                                             | Fixed<br>1 x 20 mins /day x 5 / week<br>20 sessions                             | Pain intensity (VAS)<br>• Resting pain (maximum and mean)<br>• Pain on movement (maximum and mean)<br>• Pain at night (maximum and mean) | Range of motion<br>Shoulder Pain and Disability Index<br>SF-36                                                                                       |
| Kumar and Raje, 2014 <sup>186</sup>   | P | Pr | Tension-type headache                | 36 (20W)   | TENS (LF) = 17                     | Exercises - Progressive muscular relaxation (SoC) = 19                                            | Fixed<br>1 x 15 mins / day x 7 days<br>7 sessions                               | Pain intensity (VAS)                                                                                                                     | Lakaev Academic Stress Response Scale                                                                                                                |
| Labrecque et al., 1999 <sup>187</sup> | P | E  | Labour pain (Low back pain)          | 34 (34W)   | TENS (HF) = 12                     | Standard care (massage, whirlpool bath, mobilisation, SoC, no TENS) = 12                          | PRN<br>During labour                                                            | Pain intensity (VAS)                                                                                                                     | Analgesic consumption (narcotics)<br>Pain unpleasantness (VAS)<br>Labour Agency Scale (LAS)                                                          |



08\_OL-TABLE1\_IncludedStudies

|                                            |   |    |                                                         |              |                                                            |                                                                                                                                  |                                                                |                                                                     |                                                                                                                  |
|--------------------------------------------|---|----|---------------------------------------------------------|--------------|------------------------------------------------------------|----------------------------------------------------------------------------------------------------------------------------------|----------------------------------------------------------------|---------------------------------------------------------------------|------------------------------------------------------------------------------------------------------------------|
|                                            |   |    |                                                         |              |                                                            | Intracutaneous sterile water injections (as a treatment) = 11                                                                    |                                                                |                                                                     | Labour and Delivery Satisfaction Index                                                                           |
| Laitinen and Nuutinen, 1991 <sup>188</sup> | P | Pr | Post-op cholecystectomy                                 | 60 (53W)     | TENS (HF) + Indomethacin = 20                              | Control opioid analgesics (SoC, no TENS or Indomethacin) = 10<br>Indomethacin = 10<br>TENS (LF) + Indomethacin = 20              | Unclear<br>> 16 hours                                          | Pain intensity (4 point categorical)                                | Analgesic consumption (Opioid)<br>Blood pressure<br>Heart rate<br>Respiratory frequency<br>Reported side effects |
| Lang et al., 2007 <sup>189</sup>           | P | Pr | Acute Posttraumatic hip pain during emergency transport | 101 (58W)    | TENS (HF) = 30                                             | Placebo TENS (0mA) = 33                                                                                                          | Fixed<br>~30 mins throughout transport to hospital             | Pain intensity (VAS)                                                | Anxiety (VAS)<br>Morphometric characteristics                                                                    |
| Langley et al., 1984 <sup>190</sup>        | P | E  | Rheumatoid arthritis (hand) + chronic pain (hand)       | 33 (24W)     | TENS (HF) = 11                                             | Placebo TENS (0mA) = 11<br>TENS (LF, acupuncture-like) = 11                                                                      | Fixed<br>1 x 20 mins<br>1 session                              | Pain intensity (VAS)<br>• Resting pain<br>• Pain on movement (grip) | Pressure algometry (joint tenderness)<br>Grip strength                                                           |
| Lauretti et al., 2013 <sup>191</sup>       | P | Pr | Fibromyalgia                                            | 39 (34W)     | TENS (AF, single device) + placebo TENS device = 13        | Placebo TENS (0mA, 2 devices) = 10<br>TENS (AF, two devices) = 13                                                                | Fixed<br>1 x 20min every 12 h x 7 days                         | Pain intensity (VAS)                                                | Analgesic consumption<br>Quality of sleep and fatigue                                                            |
| Lauretti et al., 2015 <sup>192</sup>       | P | Pr | Dysmenorrhea                                            | 40 (40W)     | TENS (Alternating between HF continuous, LF burst) = 20    | Placebo TENS (0mA) = 20                                                                                                          | Fixed<br>1 x 30mins at 8 h interval x 7 days<br>~14 sessions   | Pain intensity (VAS)                                                | Analgesic consumption (Diclofenac)<br>Quality of life questionnaire                                              |
| Law and Cheing, 2004 <sup>193</sup>        | P | Pr | Osteoarthritis - knee                                   | 34 (unclear) | TENS (HF) = 12                                             | Placebo TENS (0mA) = 10<br>TENS (LF) = 13<br>TENS (AF 2/100pps) = 13                                                             | Fixed<br>1 x 40 mins / day x 5 / week x 2 weeks<br>10 sessions | Pain intensity (VAS)<br>• Pain on movement                          | Range of motion<br>Time-up-and-Go                                                                                |
| Law et al., 2004 <sup>194</sup>            | P | Pr | Osteoarthritis - knee                                   | 39 (37W)     | TENS (HF) = 22                                             | Placebo TENS (0mA) = 17                                                                                                          | Fixed<br>1 x 40 mins / day x 5 days x 2 weeks<br>10 sessions   | Pain intensity (VAS)<br>• Pain on movement                          | Range of motion<br>Timed-up-and-Go                                                                               |
| Leandri et al., 1990 <sup>195</sup>        | P | Pr | Post stroke - Hemiplegic shoulder pain                  | 60 (44W)     | TENS (HF) = 20                                             | Placebo TENS (0mA) = 20<br>TENS (HF, LI) = 20                                                                                    | Fixed<br>3 days week x 4 weeks<br>12 sessions                  | No primary outcome                                                  | Range of motion - pain free                                                                                      |
| Lee et al., 1990 <sup>196</sup>            | P | Pr | Labour pain                                             | 125 (125W)   | TENS (HF continuous, LF burst) + analgesics on demand = 58 | Placebo TENS (0mA) + analgesics on demand = 33<br>No treatment (pethidine injections and Entonox inhalation) (SoC, no TENS) = 34 | PRN<br>During labour                                           | Pain intensity (NRS)                                                | Analgesic consumption<br>Pain interval<br>TENS satisfaction questionnaire                                        |
| Lee et al., 2015 <sup>197</sup>            | P | Pr | Post-op Colle's fracture                                | 36 (NR)      | TENS (HF) = 18                                             | Placebo TENS (0mA) = 18                                                                                                          | Fixed<br>1 x 15min / day x 5 days                              | Pain intensity (VAS)                                                | Analgesic consumption (PCS morphine and Cataflan)                                                                |
| Lee et al., 2019 <sup>198</sup>            | C | E  | Cancer pain - head and neck                             | 41 (6W)      | TENS (HF) = 40                                             | Placebo TENS (fading) = 40<br>No treatment = 40                                                                                  | Fixed<br>1 x 30 mins x 1 / week<br>1 session                   | Pain intensity (VAS)                                                | McGill Pain Questionnaire<br>Perception of TENS effectiveness (VAS)<br>Oral function tasks<br>Fatigue (VAS)      |
| Leo et al., 1986 <sup>199</sup>            | C | E  | Mixed pain                                              | 192 (NR)     | TENS (HF, 60pps, 250us, tolerance) = 16                    | TENS (HF, 60pps, 50us, tolerance) = 16                                                                                           | Fixed<br>1 x 30 mins<br>1 session                              | Pain intensity (VAS)                                                | None                                                                                                             |

08\_OL-TABLE1\_IncludedStudies

|                                             |   |    |                                                    |           |                                                            |                                                                                                                                                                                                                                                                                                                                                                                     |                                                           |                                                                |                                                                                                                                           |  |
|---------------------------------------------|---|----|----------------------------------------------------|-----------|------------------------------------------------------------|-------------------------------------------------------------------------------------------------------------------------------------------------------------------------------------------------------------------------------------------------------------------------------------------------------------------------------------------------------------------------------------|-----------------------------------------------------------|----------------------------------------------------------------|-------------------------------------------------------------------------------------------------------------------------------------------|--|
|                                             |   |    |                                                    |           |                                                            | TENS (HF, 60pps, 250us, <SDT) = 16<br>TENS (HF, 60pps, 50us, <SDT) = 16<br>TENS (HF, 60pps, 250us, SDT) = 16<br>TENS (HF, 60pps, 50us, SDT) = 16<br>TENS (LF, 3pps, 250us, tolerance) = 16<br>TENS (LF, 3pps, 50us, tolerance) = 16<br>TENS (LF, 3pps, 250us, SDT) = 16<br>TENS (LF, 3pps, 50us, SDT) = 16<br>TENS (LF, 3pps, 250us, <SDT) = 16<br>TENS (LF, 3pps, 50us, <SDT) = 16 |                                                           |                                                                |                                                                                                                                           |  |
| Leonard et al., 2011 <sup>200</sup>         | C | E  | Chronic pain - various                             | 23 (15W)  | TENS (HF, conventional) = 23                               | TENS (LF, acupuncture-like) = 23                                                                                                                                                                                                                                                                                                                                                    | Fixed<br>1 x 25 mins<br>1 session                         | Pain intensity (NRS)                                           | Pain unpleasantness (NRS)<br>The Patient Global Impression of Change (PGIC) scale                                                         |  |
| Lewers et al., 1989 <sup>201</sup>          | P | E  | Dysmenorrhea - primary                             | 21 (21W)  | TENS (LF, acupuncture-like) = 10                           | Placebo pill = 11                                                                                                                                                                                                                                                                                                                                                                   | Fixed<br>1 x 30 mins<br>1 session                         | Pain intensity (VAS)                                           | McGill Pain Questionnaire<br>Pain rating index                                                                                            |  |
| Lewis et al., 1984 <sup>202</sup>           | C | E  | Osteoarthritis - knee                              | 30 (22W)  | TENS (HF) = 30                                             | Placebo TENS (0mA) = 30                                                                                                                                                                                                                                                                                                                                                             | Fixed<br>3 x 30-60 mins / day<br>x 3 weeks<br>21 sessions | Pain intensity (VAS)                                           | Analgesic consumption<br>Paracetamol intake<br>Duration of pain relief<br>Pain free range of motion<br>Questionnaire of patients' opinion |  |
| Lewis et al., 1994 <sup>203</sup>           | C | E  | Osteoarthritis - knee                              | 36 (21W)  | TENS (HF) + placebo pills = 36                             | Placebo TENS (0mA) + placebo pills = 36<br>Placebo TENS (0mA) + Naproxen (SoC, sham TENS) = 36                                                                                                                                                                                                                                                                                      | PRN<br>> 3 x 30-60 mins / day x 3 weeks                   | Pain intensity (VAS)                                           | Pain relief (VAS)<br>Pain Index for the Knee<br>Patient Opinion of Treatment<br>Efficacy<br>Piper Pain Intensity Scale                    |  |
| Likar et al., 2001 <sup>204</sup>           | P | Pr | Postop pain                                        | 30 (9W)   | TENS (HF) + analgesics = 11                                | Placebo TENS (0mA) + analgesics = 12                                                                                                                                                                                                                                                                                                                                                | PRN                                                       | Pain intensity (VAS)<br>• At rest<br>• On movement (abduction) | Analgesic consumption - time of taking the 1st analgesic<br>Blood pressure,<br>Heart rate,<br>Respiratory rate,<br>Side effects,          |  |
| Lim et al., 1983 <sup>205</sup>             | P | Pr | Postop pain - abdominal                            | 30 (17W)  | TENS (NR) = 15                                             | Placebo TENS (0mA) = 15                                                                                                                                                                                                                                                                                                                                                             | PRN                                                       | Pain intensity (VAS)                                           | Analgesic consumption (morphine)                                                                                                          |  |
| Lima et al., 2011 <sup>206</sup>            | P | Pr | Post-op - coronary artery bypass graft             | 20 (10W)  | TENS (HF) + usual care (Physiotherapy and analgesics) = 10 | Usual care (Physiotherapy and analgesics, SoC, no TENS) = 10                                                                                                                                                                                                                                                                                                                        | Fixed<br>1 x 30 mins x 3 / day                            | Pain intensity (VAS)                                           | Analgesic consumption<br>Muscle strength (MIP) and expiratory muscle strength (MEP)<br>Functional residual capacity (FRC)                 |  |
| Limoges and Rickabaugh, 2004 <sup>207</sup> | P | Pr | Procedural pain - Screening flexible sigmoidoscopy | 90 (39 W) | TENS (HF) = 30                                             | Placebo TENS (0mA) = 30<br>Verbal encouragement (SoC, no TENS) = 30                                                                                                                                                                                                                                                                                                                 | Fixed                                                     | Pain intensity (NRS, categorical scale)                        | McGill Pain Questionnaire<br>12-item questionnaire (Bloating, nausea, electrode site burning or                                           |  |

08\_OL-TABLE1\_IncludedStudies

|                                            |   |    |                                           |            |                                                                                          |                                                                                                           |                                                             |                                               |                                                                                                                                                                                                                           |
|--------------------------------------------|---|----|-------------------------------------------|------------|------------------------------------------------------------------------------------------|-----------------------------------------------------------------------------------------------------------|-------------------------------------------------------------|-----------------------------------------------|---------------------------------------------------------------------------------------------------------------------------------------------------------------------------------------------------------------------------|
|                                            |   |    |                                           |            |                                                                                          |                                                                                                           | 10-20 mins throughout procedure<br>1 session                |                                               | tingling, present versus previous SFS pain comparison, and degree of procedural difficulty)                                                                                                                               |
| Lin et al., 2015 <sup>208</sup>            | P | Pr | Shoulder pain – chronic                   | 33 (25W)   | TENS (LF, 2Hz) = 17                                                                      | Transcutaneous pulsed radiofrequency = 16                                                                 | Fixed<br>1 x 15 mins x 3 / week x 1 week<br>3 sessions      | Pain intensity (VAS)                          | Serum cortisol level                                                                                                                                                                                                      |
| Lin et al., 2019 <sup>209</sup>            | P | Pr | Shoulder pain – chronic                   | 50 (34W)   | TENS (HF) = 25                                                                           | Transcutaneous pulsed radiofrequency = 25                                                                 | Fixed<br>1 x 15 mins every other day x 1 week<br>3 sessions | Pain intensity (VAS)                          | Treatment comfort level<br>Constant–Murley shoulder (CMS) score<br>PEG (pain, enjoyment of life, and general activity) score                                                                                              |
| Linde et al., 1995 <sup>210</sup>          | P | Pr | Temporomandibular joint disk displacement | 31 (26W)   | TENS (HF) = 16                                                                           | Flat occlusal splint (SoC, no TENS) = 15                                                                  | Fixed<br>3 x 30 mins / day x 6 weeks<br>66 sessions         | Pain intensity (VAS)                          | Frequency and intensity of complaints (6-step verbal scale)<br>Pain-Track system (pain intensity VAS, sleep or waking hours, mealtimes)                                                                                   |
| Linn et al., 1999 <sup>211</sup>           | P | Pr | Post-stroke – shoulder subluxation        | 40 (22W)   | TENS (HF, AM) + standard care (conventional physiotherapy and occupational therapy) = 20 | Standard care (conventional physiotherapy and occupational therapy, SoC, no TENS) = 20                    | Fixed<br>4 x 30-60 mins / day x 4 weeks<br>112 sessions     | Pain intensity (5-point NRS)                  | Pain free range of motion<br>Shoulder subluxation (radiological)<br>Upper arm girth                                                                                                                                       |
| Lison et al., 2017 <sup>212</sup>          | P | Pr | Procedural pain - office hysteroscopy     | 138 (138W) | TENS (RF) = 46                                                                           | Placebo TENS (0mA) = 46<br>Standard care without analgesia (SoC, no TENS) = 46                            | Fixed<br>5-30 mins throughout procedure<br>1 session        | Pain intensity (VAS and 5-point verbal scale) | Duration of the procedure<br>Vital parameters<br>Vasovagal symptoms<br>Unusual or adverse TENS events<br>Level of satisfaction with the procedure (NRS)                                                                   |
| Liu et al., 1985 <sup>213</sup>            | P | Pr | Post-op - thoracotomy                     | 30 (8W)    | TENS (NR) = 15                                                                           | Placebo TENS (active, <SDT) = 15                                                                          | Fixed<br>1 x 20min / day x 10days<br>10 sessions            | Pain intensity (NRS)                          | Passive range of motion<br>Functional activities score                                                                                                                                                                    |
| Liu et al., 2017 <sup>214</sup>            | P | Pr | Migraine                                  | 110 (87W)  | TENS (HF, TONS) = 22                                                                     | Placebo TENS (0mA) = 22<br>Topiramate (SoC, no TENS) = 22<br>TENS (LF, TONS) = 22<br>TENS (AF, TONS) = 22 | Fixed<br>1 x 30m/day x 4 weeks<br>28 sessions               | Pain intensity (VAS)                          | Analgesic consumption<br>Headache diary (frequency, headache intensity, duration)<br>Self-rating depression scale (SDS)<br>Self-rating anxiety scale (SAS)<br>Headache Impact Test<br>Patient satisfaction with treatment |
| Lofgren and Norrbrink, 2009 <sup>215</sup> | C | E  | Fibromyalgia                              | 32 (32W)   | TENS (HF) = 16                                                                           | Heat therapy (Superficial warmth) = 16                                                                    | PRN<br>1 x >30 mins / session as needed x 3 weeks           | Pain intensity (VAS, NRS)                     | Duration of analgesia<br>Fibromyalgia impact questionnaire<br>Treatment preference                                                                                                                                        |
| Luchesa et al., 2009 <sup>216</sup>        | P | Pr | Post-op coronary artery bypass graft      | 30 (5W)    | TENS (HF) = 15                                                                           | Placebo TENS (0mA) = 15                                                                                   | PRN<br>2 x 50 min / day x 5 days                            | Pain intensity (NRS)                          | Expiratory flux peak<br>Forced vital capacity<br>Forced expiratory volume                                                                                                                                                 |
| Lundeberg, 1984 <sup>217</sup>             | C | Pr | Myalgia - chronic                         | 36 (20W)   | TENS (HF) = 9                                                                            | Placebo pill = 9<br>EA = 9<br>Vibration = 9                                                               | Fixed<br>~ 2 x 45 mins / week x 3 weeks<br>6 sessions       | Pain intensity (VAS)                          | Duration of pain relief                                                                                                                                                                                                   |

08\_OL-TABLE1\_IncludedStudies

|                                              |   |    |                                          |           |                                                                                                                  |                                                                                                                                                                  |                                                                              |                                                                                        |                                                                                                                                                                                          |
|----------------------------------------------|---|----|------------------------------------------|-----------|------------------------------------------------------------------------------------------------------------------|------------------------------------------------------------------------------------------------------------------------------------------------------------------|------------------------------------------------------------------------------|----------------------------------------------------------------------------------------|------------------------------------------------------------------------------------------------------------------------------------------------------------------------------------------|
|                                              |   |    |                                          |           |                                                                                                                  |                                                                                                                                                                  |                                                                              |                                                                                        |                                                                                                                                                                                          |
| Lundeberg et al., 1985 <sup>218</sup>        | C | E  | Dysmenorrhea - primary                   | 21 (21W)  | TENS (HF) = 21                                                                                                   | Placebo TENS = 21 (0mA)<br>TENS (LF, burst) = 21                                                                                                                 | Fixed<br>1 x 45 mins<br>1 session                                            | Pain intensity (VAS)                                                                   | Analgesic consumption McGill Pain Questionnaire<br>Duration of pain relief                                                                                                               |
| Machado et al., 2019 <sup>219</sup>          | P | E  | Dysmenorrhea                             | 88 (88W)  | TENS (HF) + placebo<br>thermotherapy = 22                                                                        | Placebo TENS + placebo<br>thermotherapy = 22<br>Thermotherapy (microwave<br>diathermy) + placebo TENS = 22<br>TENS + Thermotherapy<br>(microwave diathermy) = 22 | Fixed<br>1 x 30 mins<br>1 session                                            | Pain intensity (NRS)                                                                   | McGill Pain Questionnaire<br>Conditioned pain modulation test                                                                                                                            |
| Machin et al., 1988 <sup>220</sup>           | P | E  | Back pain - chronic low non-specific     | 30 (?NR)  | TENS (HF) = 15                                                                                                   | Placebo TENS = 15 (0mA)                                                                                                                                          | Fixed<br>1 x 20 mins/day,<br>unclear x days/week<br>x 3 weeks<br>15 sessions | Pain intensity (VAS and verbal descriptive scale)                                      | Pain diary information                                                                                                                                                                   |
| Mahure et al., 2017 <sup>221</sup>           | P | Pr | Post-op arthroscopic rotator cuff repair | 37 (19W)  | TENS (HF) = 21                                                                                                   | Placebo TENS = 16 (0mA)                                                                                                                                          | Fixed<br>4 x 45 min /day<br>x 7 days<br>28 sessions                          | Pain intensity (VAS)                                                                   | Analgesic consumption (Narcotic)                                                                                                                                                         |
| Manigandan et al., 2014 <sup>222</sup>       | P | Pr | Post stroke - subluxation                | 24 (7W)   | TENS (HF, at supraspinatus, posterior deltoid + long head of biceps) + physiotherapy + occupational therapy = 12 | TENS (HF, at supraspinatus and posterior deltoid) + physiotherapy + occupational therapy = 12                                                                    | Fixed<br>1 x 30-60mins / day<br>x 5 weeks<br>35 sessions                     | No primary outcome                                                                     | Shoulder subluxation in mm (x-ray)<br>Pain - free range of passive lateral rotation and active shoulder abduction range of motion                                                        |
| Mannheimer and Carlsson, 1979 <sup>223</sup> | C | E  | Rheumatoid arthritis                     | 20 (13W)  | TENS (HF) = 20                                                                                                   | TENS (LF) = 20<br>TENS (LF, burst) = 20                                                                                                                          | Fixed<br>1 x 10 mins<br>1 session                                            | Pain intensity (5-point scale)                                                         | Loading test (time patient could hold weight)<br>Duration of analgesia                                                                                                                   |
| Mannheimer and Whalen, 1985 <sup>224</sup>   | P | Pr | Dysmenorrhea                             | 27 (27W)  | TENS (HF) = 9                                                                                                    | Placebo TENS (0mA) = 9<br>TENS (LF, acupuncture-like) = 9                                                                                                        | Fixed<br>1 x 30 mins<br>1 session                                            | Pain intensity (VAS)                                                                   | Total number of painful days<br>Duration of pain relief                                                                                                                                  |
| Mannheimer et al., 1978 <sup>225</sup>       | C | E  | Rheumatoid arthritis                     | 19 (17W)  | TENS (HF, SBC at pain, Group 1) = 19                                                                             | TENS (SDT at pain, group 2) = 19<br>TENS (HF, SDT at remote site, Group 3) = 19                                                                                  | Fixed<br>5 mins / day x 15 days<br>15 sessions                               | No primary outcome                                                                     | Degree of pain relief<br>Loading test (time patient could hold weight)                                                                                                                   |
| Mannheimer et al., 1985 <sup>226</sup>       | P | Pr | Severe angina pectoris                   | 23 (4W)   | TENS (HF) + antianginal medication as needed = 12                                                                | Antianginal medication (SoC, no TENS, 'no treatment' control) = 11                                                                                               | Fixed<br>3 x 60 mins / day x 10 weeks during anginal attacks<br>30 sessions  | Pain intensity (5-point scale)                                                         | Recovery time (min)<br>Frequency of anginal attacks<br>Consumption nitroglycerin<br>Work during exercise<br>Pulse rate, blood pressure<br>Dyspnoea (5-point scale)<br>Electrocardiograms |
| Mansourian et al., 2019 <sup>227</sup>       | P | Pr | TMJ - Myofascial pain                    | 108 (88W) | TENS (HF) + medication = NR (36)                                                                                 | Medication Control (SoC, no intervention) = NR (36)<br>LLLT + medication = NR (36)                                                                               | Fixed<br>1 x 10 mins / day x 3 / week x 3 weeks<br>10 sessions               | Pain intensity (VAS)<br>• at rest<br>• on movement - variety of face and jaw movements | Mouth opening<br>Lateral protrusive movements                                                                                                                                            |

08\_OL-TABLE1\_IncludedStudies

|                                        |   |    |                                                 |           |                                                       |                                                                                                                                                                   |                                                                       |                                |                                                                                                                          |
|----------------------------------------|---|----|-------------------------------------------------|-----------|-------------------------------------------------------|-------------------------------------------------------------------------------------------------------------------------------------------------------------------|-----------------------------------------------------------------------|--------------------------------|--------------------------------------------------------------------------------------------------------------------------|
| Mansuri et al., 2019 <sup>228</sup>    | P | E  | Musculoskeletal pain - Muscle tension dysphonia | 30 (20W)  | TENS (HF) = 15                                        | Placebo TENS (0mA) = 15                                                                                                                                           | Fixed<br>1 x 20 mins<br>1 session                                     | Pain intensity (VAS)           | Vocal tract discomfort scale<br>Extended Nordic musculoskeletal symptoms questionnaire<br>Auditory-perceptual assessment |
| Mansuri et al., 2020 <sup>229</sup>    | P | Pr | Musculoskeletal pain - Muscle tension dysphonia | 20 (20W)  | TENS (LF) + vocal tract training = 10                 | Vocal tract training (SoC) = 10                                                                                                                                   | Fixed<br>1 x 50 mins / day x 2 / week x 2 weeks<br>10 sessions        | Pain intensity (VAS)           | Extended Nordic Musculoskeletal Symptoms Questionnaire<br>Vocal tract discomfort                                         |
| Marchand et al., 1993 <sup>230</sup>   | P | Pr | Back pain - chronic low non-specific            | 42 (22W)  | TENS (HF) = 14                                        | Placebo TENS (0mA) = 12<br>No treatment = 16                                                                                                                      | Fixed<br>1 x 30 mins / day x 2 / week x 10 weeks<br>20 sessions       | Pain intensity (VAS)           | Pain unpleasantness (VAS)                                                                                                |
| Mascarin et al., 2012 <sup>231</sup>   | P | Pr | Osteoarthritis - knee                           | 38 (38W)  | TENS (MF) = 12                                        | Kinesiology taping = 16<br>Ultrasound = 10                                                                                                                        | Fixed<br>1 x 20 mins / day x 2 / week x 12 weeks<br>24 sessions       | Pain intensity (VAS)           | WOMAC<br>Range of motion - knee flexion and extension<br>Six-minute walking test (6-MWT)                                 |
| McCallum et al., 1988 <sup>232</sup>   | P | Pr | Post-op decompressive lumbar laminectomy        | 20 (13W)  | TENS (HF) = 10                                        | Placebo TENS (0mA) = 10                                                                                                                                           | PRN (NR)                                                              | No primary outcome             | Analgesic consumption<br>Plasma morphine concentrations                                                                  |
| Melzack et al., 1983 <sup>233</sup>    | P | Pr | Back pain – acute and chronic low non-specific  | 41 (22W)  | TENS (LF) = 20                                        | Gentle massage = 21                                                                                                                                               | Fixed<br>2 x 30 mins / week x 5 weeks<br>10 sessions                  | Pain intensity (PPI)           | McGill Pain Questionnaire<br>Range of motion                                                                             |
| Merrill, 1989 <sup>234</sup>           | P | Pr | Post-op urologic surgery                        | 96 (0W)   | TENS (NR) + analgesics as needed = 48                 | Analgesics (SoC, no TENS) = 48                                                                                                                                    | PRN                                                                   | No primary outcome             | Analgesic consumption                                                                                                    |
| Miller et al., 2007 <sup>235</sup>     | C | Pr | Spasticity – multiple sclerosis                 | 32 (17W)  | TENS (HF, for 8 hrs) = 32                             | TENS (HF, for 60 mins) = 32                                                                                                                                       | Fixed<br>1 x 8 hours or 60 mins / day x 2 weeks<br>14 sessions        | Pain intensity (VAS)           | Global Spasticity Scale (GSS)<br>Penn Spasm Scale (PSS)<br>TENS experience questionnaire                                 |
| Milsom et al., 1994 <sup>236</sup>     | C | E  | Dysmenorrhea - primary                          | 12 (12W)  | TENS (HF, HI) = 12                                    | Naproxen (500 mg, SoC not TENS) = 12                                                                                                                              | Unclear<br>1 x 10 seconds repeated as necessary                       | Pain intensity (5-point scale) | Uterine contractility and intrauterine pressure                                                                          |
| Moharic et al., 2009 <sup>237</sup>    | P | Pr | Peripheral diabetic neuropathy                  | 65 (NR)   | TENS (HF) = 46                                        | Pregabalin = 5<br>TENS (HF) + Pregabalin = 14                                                                                                                     | Fixed<br>1 x 3h / day x 7 days / week<br>3 weeks<br>21 sessions       | Pain intensity (VAS)           | Pain unpleasantness (VAS)<br>Pain interference with daily activities and sleep (VAS)<br>SF-36                            |
| Mondal et al., 2019 <sup>238</sup>     | P | Pr | Myofascial pain                                 | 109 (86W) | TENS (HF) ++ SoC (exercises + heat + medication) = 34 | Ultrasound therapy + SoC (exercises + heat + medication) = 36<br>Trigger point injection (steroid + local anaesthetic) + SoC (exercises + heat + medication) = 39 | Fixed<br>1 x 20 mins per trigger point / day x 2 weeks<br>14 sessions | Pain intensity (VAS)           | Index score of trigger point after palpation<br>Neck disability Index                                                    |
| Moore and Shurman, 1997 <sup>239</sup> | C | E  | Chronic back pain                               | 24 (16W)  | TENS (HF) = 24                                        | Placebo TENS (0mA) = 24<br>NMES = 24<br>NMES + TENS = 24                                                                                                          | Fixed<br>1 x 5 hours / day x 2 days<br>2 sessions                     | Pain intensity (VAS)           | Pain relief (VAS)                                                                                                        |
| Mora et al., 2006 <sup>240</sup>       | P | Pr | Renal colic in Emergency care                   | 100 (29W) | TENS (HF) = 39                                        | Placebo TENS (sham, 0mA) = 34                                                                                                                                     | Fixed<br>1 x 30 mins<br>1 session                                     | Pain intensity (VAS)           | Anxiety (VAS)<br>Morphometric characteristics                                                                            |

08\_OL-TABLE1\_IncludedStudies

|                                         |   |    |                                                          |            |                                           |                                                                                                                                              |                                                                              |                                                    |                                                                                                                                                         |
|-----------------------------------------|---|----|----------------------------------------------------------|------------|-------------------------------------------|----------------------------------------------------------------------------------------------------------------------------------------------|------------------------------------------------------------------------------|----------------------------------------------------|---------------------------------------------------------------------------------------------------------------------------------------------------------|
| Morgan et al., 1996 <sup>241</sup>      | P | Pr | Procedural pain - Distention shoulder arthrography       | 60 (32W)   | TENS (HF) + Lignocaine = 20               | Placebo TENS (active, $\leq$ SDT) + Lignocaine = 20<br>Lignocaine (SoC, no TENS, control) = 20                                               | Fixed<br>1 x 20 mins before procedure then throughout procedure<br>1 session | Pain intensity (VAS)                               | None                                                                                                                                                    |
| Møystad et al., 1990 <sup>242</sup>     | C | E  | Rheumatic disease involving the temporomandibular joint. | 19 (17W)   | TENS (HF) = 19                            | Placebo TENS (0mA) = 19<br>TENS (LF) = 19                                                                                                    | Fixed<br>1 x 30 mins<br>1 session                                            | Pain intensity (VAS)<br>• At rest<br>• on movement | Muscle tenderness to palpation (3-point scale)<br>Range of motion                                                                                       |
| Murray et al., 2004 <sup>243</sup>      | C | E  | Angina pectoris                                          | 10 (2W)    | TENS (HF) = 10                            | Placebo pills = 10                                                                                                                           | Fixed<br>3 x 60 mins / day x 2 / week<br>10 sessions                         | No primary outcome                                 | Treadmill exercise tests<br>• exercise time<br>• Time to maximum ST depression<br>• Rate-pressure product at peak exercise<br>• Time to onset of angina |
| Mutlu et al., 2013 <sup>244</sup>       | P | Pr | Fibromyalgia                                             | 66 (66W)   | TENS + Exercise (supervised) = 33         | Supervised exercise (SoC, no TENS) = 33                                                                                                      | Fixed<br>1 x 30 mins / day x 5 days x 5 weeks<br>25 sessions                 | Pain intensity (VAS – within FIQ)                  | Fibromyalgia Impact Questionnaire (FIQ)<br>Tender point count)<br>Myalgic pain score SF-36                                                              |
| Nabi et al., 2015 <sup>245</sup>        | P | Pr | Peripheral diabetic neuropathy                           | 65 (29W)   | TENS (HF) = 30                            | Pulsed radiofrequency = 30                                                                                                                   | Fixed<br>1 x 20 mins every 2 days x 2 weeks<br>10 sessions                   | Pain intensity (NRS)                               | None                                                                                                                                                    |
| Nash et al., 1990 <sup>246</sup>        | P | E  | Chronic pain                                             | 200 (126W) | TENS (HF, continuous, 100pps) = 50        | TENS (HF, continuous, 10pps) = 50<br>TENS (LF, burst, 10pps) = 50<br>TENS (LF, burst 100pps) = 50                                            | PRN<br>< 2 years                                                             | Pain intensity (VAS)                               | Responders ( $\geq$ 50% reduction in pain)<br>Time to $\geq$ 50% reduction in pain                                                                      |
| Navarathnam et al., 1984 <sup>247</sup> | P | Pr | Post-op cardiac surgery                                  | 31 (6W)    | TENS (NR) + analgesics on demand = 14     | Placebo TENS (0mA) + analgesics on demand = 17                                                                                               | PRN                                                                          | Pain intensity (5-point scale)                     | Analgesic consumption<br>Spirometry<br>Experience of cardiac surgery (Questionnaire)                                                                    |
| Neary, 1981 <sup>248</sup>              | P | Pr | Post incisional surgical pain                            | 200 (NR)   | TENS (HF) = 100                           | Morphine sulphate or Meperidine Hydrochloride (SoC, no TENS) = 100                                                                           | PRN<br>1 x 30 mins or as needed                                              | No primary outcome                                 | Analgesic consumption                                                                                                                                   |
| Neighbours et al., 1987 <sup>249</sup>  | P | E  | Dysmenorrhea                                             | 20 (20W)   | TENS (LF, acupuncture-like) = 10          | Placebo pill = 10                                                                                                                            | Fixed<br>1 x 30 mins<br>1 session                                            | Pain intensity (VAS)                               | Analgesic consumption<br>McGill Pain Questionnaire<br>Pain rating index                                                                                 |
| Nesheim, 1981 <sup>250</sup>            | P | Pr | Labour pain                                              | 70 (70W)   | TENS (LF, burst) = 35                     | Placebo TENS (0mA) = 35                                                                                                                      | PRN during labour                                                            | No primary outcome                                 | Pain relief (4-point category scale)                                                                                                                    |
| Neumark et al., 1978 <sup>251</sup>     | P | Pr | Labour pain                                              | 30 (30W)   | TENS (NR) = 10                            | Pethidine (SoC, no TENS) = 5<br>Placebo TENS (0mA) = 5<br>Remote TENS (electrodes in wrong positions) = 5<br>No treatment = 5 (no analgesia) | Fixed<br>70 mins<br>1 session                                                | Pain intensity (6-point scale)                     | None                                                                                                                                                    |
| Ng et al., 2003 <sup>252</sup>          | P | Pr | Osteoarthritis - knee                                    | 24 (23W)   | TENS (LF) + Education about knee care = 8 | Education about knee care (SoC, no TENS) = 8<br>EA + Education about knee care = 8                                                           | Fixed<br>1 x 20 mins on alternative days x each session over 2 weeks         | Pain intensity (NRS)                               | Range of motion<br>Timed Up-and-Go test                                                                                                                 |



08\_OL-TABLE1\_IncludedStudies

|                                                                                                                                                                                           |   |    |                                                      |           |                                                    |                                                                                                                                |                                                                        |                                                    |                                                                                                                                                                                                                                                               |
|-------------------------------------------------------------------------------------------------------------------------------------------------------------------------------------------|---|----|------------------------------------------------------|-----------|----------------------------------------------------|--------------------------------------------------------------------------------------------------------------------------------|------------------------------------------------------------------------|----------------------------------------------------|---------------------------------------------------------------------------------------------------------------------------------------------------------------------------------------------------------------------------------------------------------------|
|                                                                                                                                                                                           |   |    |                                                      |           |                                                    |                                                                                                                                | 8 sessions                                                             |                                                    |                                                                                                                                                                                                                                                               |
| Nordemar and Thorner, 1981 <sup>253</sup>                                                                                                                                                 | P | Pr | Neck pain - acute cervical pain                      | 30 (18W)  | TENS (HF) + neck collar + analgesics = 10          | Neck collar + analgesics (SoC, no TENS) = 10<br>Manual therapy + neck collar + analgesics = 10                                 | Fixed<br>1 x 30 mins x 3 / week<br>3 session                           | Pain intensity (VAS)<br>• at rest<br>• on movement | Analgesic consumption<br>Range of motion                                                                                                                                                                                                                      |
| Norrbrink, 2009 <sup>254</sup>                                                                                                                                                            | C | Pr | Spinal cord injury neuropathic pain                  | 24 (4W)   | TENS (HF) = 24                                     | TENS (LF) = 24                                                                                                                 | Fixed<br>3 x 30 to 40 mins / day x 7 days x 2 weeks<br>42 sessions     | Pain intensity (Borg CR-10)                        | Pain unpleasantness (BORG CR - 10)<br>Global pain relief (5-point scale)<br>Multidimensional Pain Inventory<br>Hospital Anxiety and Depression Scale<br>Nordic Basic Sleep Questionnaire<br>Life Satisfaction Instrument-9<br>Ability to cope with pain (NRS) |
| Olsén et al., 2007 <sup>255</sup>                                                                                                                                                         | P | E  | Postpartum uterine contractions                      | 21 (21W)  | TENS (HF, brief HI) = 12                           | TENS (HF, LI) = 8                                                                                                              | Fixed<br>1 x 1 min repeated 2 times if necessary<br>1 session          | Pain intensity (VAS)                               | Uterine contraction discomfort (5-point verbal scale)<br>Discomfort from treatment (5-point verbal scale)                                                                                                                                                     |
| Olsen et al., 2019 <sup>256</sup>                                                                                                                                                         | C | E  | Dysmenorrhea - primary                               | 16 (16W)  | TENS (HF, brief HI) = 7 (7W)                       | Control (SoC, no TENS, 'delayed intervention) = 9 (9W)                                                                         | PRN<br>1 x 60 seconds repeated as needed                               | Pain intensity (VAS)                               | Analgesic consumption<br>Limitation in physical function (VAS)<br>Discomfort from the treatment                                                                                                                                                               |
| Oncel et al., 2002 <sup>257</sup>                                                                                                                                                         | P | Pr | Minor rib fracture                                   | 100 (41W) | TENS (HF) = 25                                     | Placebo TENS (0mA) + Naproxen NSAID = 25<br>Naproxen NSAID (SoC, no TENS) = 25<br>Placebo pills = 25                           | Fixed<br>2 x 30 mins / day x 3 days<br>6 sessions                      | Pain intensity (VAS)                               | None                                                                                                                                                                                                                                                          |
| Oosterhof et al., 2006 <sup>258</sup><br>Secondary reports<br>Oosterhof et al., 2008 <sup>259</sup> ,<br>Oosterhof et al., 2012 <sup>260</sup> ,<br>Oosterhof et al., 2012 <sup>261</sup> | P | Pr | Chronic pain, various types                          | 163 (97W) | TENS (HF) = 81                                     | Placebo TENS = 82 (0mA)                                                                                                        | PRN<br>x 10 days                                                       | Pain intensity (VAS)                               | TENS satisfaction                                                                                                                                                                                                                                             |
| Ordog, 1987 <sup>262</sup>                                                                                                                                                                | P | Pr | Acute traumatic pain                                 | 100 (NR)  | TENS (NR) = 25                                     | Placebo TENS (0mA) = 25<br>TENS (NR) + acetaminophen with codeine = 25<br>Placebo TENS (0mA) + acetaminophen with codeine = 25 | PRN                                                                    | Pain intensity (VAS)                               | TENS satisfaction<br>Side effects                                                                                                                                                                                                                             |
| Ozkaraoglu et al., 2020 <sup>263</sup>                                                                                                                                                    | P | Pr | Back pain - low non-specific                         | 40 (19W)  | TENS (HF) + ultrasound, hot pack and exercise = 20 | High Intensity Laser Therapy (HILT) + ultrasound, hot pack and exercise = 20                                                   | Fixed<br>1 x 20 mins / day x 5 days a week for a total of 20 sessions. | Pain intensity (VAS)                               | Range of motion<br>Oswestry Disability Questionnaire<br>Beck Depression Inventory                                                                                                                                                                             |
| Ozkul et al., 2015 <sup>264</sup>                                                                                                                                                         | C | Pr | Neuropathic pain in patients with spinal cord injury | 24 (6W)   | TENS (HF) = 12                                     | Visual illusion = 12                                                                                                           | Fixed<br>1 x 30 mins / day x 5 days x 2 weeks<br>10 sessions           | Pain intensity (VAS)                               | Neuropathic sign and symptoms (DNa)<br>McGill pain questionnaire<br>Neuropathic Pain Scale (NPS)<br>Brief Pain Inventory                                                                                                                                      |

08\_OL-TABLE1\_IncludedStudies

|                                          |   |    |                                                |            |                                                     |                                                                                                                            |                                                                     |                                               |                                                                                                                                                                                               |
|------------------------------------------|---|----|------------------------------------------------|------------|-----------------------------------------------------|----------------------------------------------------------------------------------------------------------------------------|---------------------------------------------------------------------|-----------------------------------------------|-----------------------------------------------------------------------------------------------------------------------------------------------------------------------------------------------|
| Oztas and Iyigun, 2019 <sup>265</sup>    | P | Pr | Post-op abdominal surgery                      | 48 (10W)   | TENS (LF-HF) + Tramadol PCA + rescue Pethidine = 16 | Analgesic Medication (tramadol PCA + rescue pethidine (SoC, no TENS) = 16<br>TAES + tramadol PCA + rescue pethidine = 16   | Fixed<br>1 x 30 mins at 2h, 18h, 22h, 42, 46h post-op<br>5 sessions | Pain intensity (VAS)                          | Analgesic consumption (Tramadol - PCA)<br>Nausea severity (VAS)<br>Vomiting (frequency)<br>Antiemetic consumption<br>Pulmonary function tests                                                 |
| Ozturk et al., 2016 <sup>266</sup>       | P | Pr | Post-op cardiac surgery                        | 120 (39W)  | TENS (HF) + morphine (PCA) = 40                     | Placebo TENS + placebo parasternal block (saline) + morphine (PCA) (Control) = 37<br>Placebo TENS + Parasternal block = 38 | PRN<br>60 mins treatments with 60 mins rest as needed               | Pain intensity (VAS)                          | Analgesic consumption (morphine - PCA)<br>Mean arterial pressure, heart rate, and arterial blood gas analysis<br>Duration of extubating, ICU and hospital stay<br>Opioid-related side effects |
| Padma et al., 2000 <sup>267</sup>        | P | Pr | Labour pain                                    | 70 (70W)   | TENS (HF) = 50                                      | Placebo TENS (0mA) = 20                                                                                                    | PRN                                                                 | No primary outcome                            | Pain relief (4 categories)<br>• Subjective assessment (by the patient)<br>• Observer Assessment<br>• Monitoring mother and foetus<br>• Duration of labour APGAR score                         |
| Paker et al., 2006 <sup>268</sup>        | P | Pr | Knee AO                                        | 60 (NR)    | TENS (HF) = NR                                      | Intra-articular hyaluronic acid injection = NR                                                                             | Fixed<br>1 x 20 mins / day x 5 / week x 3 weeks<br>15 sessions      | Pain intensity (5-point scale) from WOMAC     | WOMAC<br>Lequesne Index<br>SF-36                                                                                                                                                              |
| Palmer et al., 2014 <sup>269</sup>       | P | Pr | Osteoarthritis - knee                          | 224 (141W) | TENS (HF) + Exercise + education = 73               | Placebo TENS (0mA) + Exercise + education = 74<br>Exercise + education + exercise (SoC, no TENS control) = 77              | PRN<br>x 6 weeks                                                    | Pain intensity (5-point scale) from WOMAC     | WOMAC<br>Maximum knee extensor torque<br>Patient global assessment of change scale<br>Self-efficacy for exercise                                                                              |
| Pan et al., 2003 <sup>270</sup>          | P | E  | Tendinitis - Chronic calcific of the Shoulders | 60 (39W)   | TENS (HF) + hydrocollator pack = 28 (30 shoulders)  | Extracorporeal shock wave = 32 (33 shoulders)                                                                              | Fixed<br>1 x 20 mins / day x 3 / week x 4 weeks<br>12 sessions      | Pain intensity (VAS)                          | Constant score<br>Manual muscle test (MMT)                                                                                                                                                    |
| Park et al., 2015 <sup>271</sup>         | P | Pr | Post op thyroidectomy - neck pain              | 100 (NR)   | TENS (HF) = 50                                      | Placebo TENS = 50 (0mA)                                                                                                    | Fixed<br>throughout surgery<br>1 session                            | Pain intensity (NRS)<br>• Anterior wound pain | Analgesic consumption post-operative                                                                                                                                                          |
| Patil and Aileni, 2017 <sup>272</sup>    | P | Pr | Temporomandibular disorder                     | 36 (23W)   | TENS (HF) = 18                                      | Exercise home programme = 18                                                                                               | Fixed<br>1 x 30 mins / day x once / week x 4 weeks<br>1 session     | Pain intensity (VAS)                          | Pain free range of motion<br>masticatory muscle tenderness (VAS)                                                                                                                              |
| Peacock et al., 2019 <sup>273</sup>      | P | Pr | Chronic pain - Various                         | 100 (22W)  | TENS (LF, AL-TENS) + SoC = 30                       | Tennant Biomodulator + SoC = 34<br>Acupuncture + SoC = 36                                                                  | PRN<br>2 x 20min / day x 6 weeks<br>12 sessions                     | Pain intensity (VAS, as pain log)             | Million visual analogue scale<br>PTSD checklist – military<br>Center for Epidemiological Studies - depression scale                                                                           |
| Pietrosimone et al., 2009 <sup>274</sup> | P | E  | Tibiofemoral OA                                | 33 (16W)   | TENS (HF) = 10                                      | No treatment (control) = 12<br>Focal joint knee cooling = 11                                                               | Fixed<br>1 x 45 mins<br>1 session                                   | Pain intensity (VAS)                          | WOMAC<br>Quadriceps CAR                                                                                                                                                                       |

08\_OL-TABLE1\_IncludedStudies

|                                                                                                          |   |    |                                                  |            |                                                                        |                                                                                                                                                                                                      |                                                                                    |                                                              |                                                                                                                                   |
|----------------------------------------------------------------------------------------------------------|---|----|--------------------------------------------------|------------|------------------------------------------------------------------------|------------------------------------------------------------------------------------------------------------------------------------------------------------------------------------------------------|------------------------------------------------------------------------------------|--------------------------------------------------------------|-----------------------------------------------------------------------------------------------------------------------------------|
|                                                                                                          |   |    |                                                  |            |                                                                        |                                                                                                                                                                                                      |                                                                                    |                                                              | Peak knee extension torque with maximal voluntary isometric contractions (MVIC)                                                   |
| Pietrosimone et al., 2011 <sup>275</sup><br>Secondary report<br>Pietrosimone et al., 2010 <sup>276</sup> | P | Pr | Tibiofemoral OA                                  | 36 (21W)   | TENS (HF) + Exercises (strengthening) = 12                             | Placebo TENS (Fading) = 12<br>Exercise (strengthening, SoC, no TENS control) = 12                                                                                                                    | PRN<br>>8 hours / day x 4 weeks<br>21 sessions                                     | No primary outcome                                           | WOMAC<br>Quadriceps strength<br>Peak knee extension torque with maximal voluntary isometric contractions                          |
| Pietrosimone et al., 2020 <sup>277</sup>                                                                 | P | Pr | OA, knee [during therapeutic exercise]           | 90 (39W)   | TENS (HF) + Exercises (strengthening) = 30                             | Placebo TENS (0mA) + Exercises<br>Exercises = 30                                                                                                                                                     | PRN during all exercise sessions and during activities of daily living for 4 weeks | No primary outcomes                                          | WOMAC<br>Quadriceps Strength and Voluntary activation<br>Peak knee extension torque with maximal voluntary isometric contractions |
| Pike, 1978 <sup>278</sup>                                                                                | P | Pr | Post-op hip replacement                          | 40 (19W)   | TENS (HF) + medication (pethidine) = 20                                | Medication (pethidine, SoC, no TENS control) = 20                                                                                                                                                    | PRN<br>> 8 hours / day                                                             | No primary outcome                                           | Analgesic consumption (Pethidine)<br>Pain relief (4 categories)<br>Nausea and vomiting (frequency)                                |
| Pitangui et al., 2012 <sup>279</sup>                                                                     | P | Pr | Post episiotomy pain                             | 40 (40W)   | TENS (HF) = 20                                                         | No treatment = 20                                                                                                                                                                                    | Fixed<br>1 x 60 mins<br>1 session                                                  | Pain intensity (NRS)<br>• rest<br>• standing<br>• walking    | McGill Pain Questionnaire<br>TENS-related questions<br>Functional limitations                                                     |
| Pitangui et al., 2014 <sup>280</sup>                                                                     | P | E  | Post episiotomy pain                             | 33 (40W)   | TENS (HF) = 11                                                         | Placebo TENS (0mA) = 10<br>TENS (LF) = 13                                                                                                                                                            | Fixed<br>1 x 30 mins pre-injection<br>1 session                                    | Pain intensity (NRS)<br>• Resting pain<br>• Pain on movement | Treatment satisfaction<br>TENS-related questions                                                                                  |
| Platon et al., 2010 <sup>281</sup>                                                                       | P | Pr | Post-op surgical abortion                        | 200 (200W) | TENS (HF, HI) = 100                                                    | Fentanyl i.v. (SoC, no TENS control) = 100                                                                                                                                                           | Fixed<br>1 x 1 min (repeated if necessary)                                         | Pain intensity (VAS)                                         | Analgesic consumption<br>Nausea (VAS)<br>Time in recovery ward<br>Ramsay sedation score                                           |
| Platon et al., 2018 <sup>282</sup>                                                                       | C | E  | Post-op gynaecologic laparoscopic surgery        | 93 (93W)   | TENS (HF, HI) = 47                                                     | Morphine i.v. (SoC, no TENS control) = 46                                                                                                                                                            | Fixed<br>1 x 1 min (repeated if necessary)                                         | Pain intensity (VAS)                                         | Analgesic consumption (Opioids)<br>Nausea (VAS)<br>Time in recovery ward<br>Ramsay sedation score                                 |
| Prabhakar and Ramteke, 2011 <sup>283</sup>                                                               | P | E  | Radiculopathy - cervical                         | 75 (39W)   | TENS (HF) + Hot fomentation + Exercises, Isometric neck (Group B) = 25 | Hot fomentation + Exercises, Isometric neck (SoC, no TENS control, Group C) = 25<br>Cervical contralateral lateral flexion mobilization + Hot fomentation + Exercises, Isometric neck (Group A) = 25 | Fixed<br>1 x 30 mins<br>1 session                                                  | Pain intensity (VAS)                                         | Northwick<br>Park neck pain questionnaire<br>Neuropathic pain scale,<br>SF-McGill Pain Questionnaire                              |
| Presser et al., 2000 <sup>284</sup>                                                                      | P | E  | Procedural pain - Injection of epidural steroids | 90 (30W)   | TENS (HF) = 30                                                         | Placebo TENS (active, <SDT) + Local anaesthetic = 30<br>Local anaesthetic (SoC, no TENS control) = 30                                                                                                | Fixed<br>Throughout procedure                                                      | Pain intensity (VAS)                                         | None                                                                                                                              |

08\_OL-TABLE1\_IncludedStudies

|                                        |   |    |                                                              |                               |                                                          |                                                                                                                                                                                                              |                                                                                     |                                                                         |                                                                                                                                                                                                     |
|----------------------------------------|---|----|--------------------------------------------------------------|-------------------------------|----------------------------------------------------------|--------------------------------------------------------------------------------------------------------------------------------------------------------------------------------------------------------------|-------------------------------------------------------------------------------------|-------------------------------------------------------------------------|-----------------------------------------------------------------------------------------------------------------------------------------------------------------------------------------------------|
| Rainov et al., 1994 <sup>285</sup>     | P | Pr | Post-op spinal surgery                                       | 234 (121W)                    | TENS (Alternating F) + analgesic medication = 126        | Analgesic medication (SoC, no TENS control) = 108                                                                                                                                                            | Fixed<br>1 x 60 mins every 2 hours<br>? how many days?                              | Pain intensity (VAS)                                                    | Analgesic consumption<br>Pain unpleasantness (VAS)                                                                                                                                                  |
| Rajfur et al., 2017 <sup>286</sup>     | P | Pr | Back pain - chronic low non-specific                         | 127 (73W)                     | TENS (HF) + exercise = 20                                | Exercise (SoC, no TENS control) = 21<br>TENS (LF, acupuncture = like) + exercise = 20<br>High-voltage electrical stimulation) + exercise = 22<br>IFT) + exercise = 22<br>Diadynamic current) + exercise = 22 | Fixed<br>1 x 60 mins / day x 5 / week x 3 weeks<br>15 sessions                      | Pain intensity (VAS)                                                    | Modified Laitinen pain scale<br>The Oswestry questionnaire<br>Roland-Morris Disability Questionnaire<br>Lasègue test<br>Schober test<br>Postural stability                                          |
| Rajpurohit et al., 2010 <sup>287</sup> | P | Pr | Masticatory muscle pain                                      | 60 (24W)                      | TENS (HF) = 30                                           | Microcurrent electrical nerve stimulation (= 30)                                                                                                                                                             | Fixed<br>1 x 20 mins / day x 7 days<br>7 sessions                                   | Pain intensity (VAS)                                                    | Muscle tenderness (algometry)                                                                                                                                                                       |
| Rakel and Frantz, 2003 <sup>288</sup>  | C | E  | Post-op abdominal surgery                                    | 33 (17W)                      | TENS (MF) + analgesics = 33                              | Placebo TENS (0mA) + analgesics = 33<br>Analgesics (SoC, no TENS control) = 33                                                                                                                               | Fixed<br>1 x 15 mins for duration of measurements                                   | Pain intensity (NRS)                                                    | Iowa Gait Test<br>Pulmonary status                                                                                                                                                                  |
| Rakel et al., 2014 <sup>289</sup>      | P | Pr | Post-op knee arthroplasty (control of pain during exercises) | 317 (173W)                    | TENS (HF) + analgesics = 122                             | Placebo TENS (Fading) + analgesics = 123<br>Analgesics (SoC, no TENS control) = 72                                                                                                                           | Fixed<br>1 x 20 mins before exercise, then during exercise x 1 to 2 / day x 6 weeks | Pain intensity (NRS)<br>• At rest<br>• On movement                      | Pain catastrophizing<br>State and trait anxiety<br>Geriatric depression scale<br>Knee injury and osteoarthritis outcome score<br>Quantitative sensory testing<br>Range of motion<br>Gait speed test |
| Ramanathan et al., 2017 <sup>290</sup> | P | Pr | Pot op knee arthroplasty                                     | 116 (30W)                     | TENS (NR) + opioid analgesics + femoral nerve block = 58 | Placebo TENS (Fading to 0mA) + opioid analgesics + femoral nerve block = 58                                                                                                                                  | PRN<br>1 x 2 hours followed by 30 mins rest as needed for 6 weeks                   | Pain intensity (VAS)                                                    | Analgesic consumption<br>Time up and go test<br>Range of motion<br>Knee injury and osteoarthritis outcome score<br>SF-12                                                                            |
| Ramos et al., 2018 <sup>291</sup>      | P | Pr | Back pain - low, lumbar disc herniation                      | 29 (14W)                      | TENS (HF) = 14                                           | Exercises (segmental stabilisation, SoC) = 15                                                                                                                                                                | Fixed<br>1 x 60 mins / day x 2 / week x 8 weeks<br>18 sessions                      | Pain intensity (VAS)                                                    | LM Muscular Fatigue<br>Fatigue Test<br>Transversus abdominis activation capacity<br>Oswestry Disability Index                                                                                       |
| Rani et al., 2020 <sup>292</sup>       | P | Pr | Rotator cuff                                                 | 76 (34W)<br>70 (32W) analysed | TENS (HF) + SoC + rescue meds = 35                       | Exercises (SoC, no TENS control) + rescue meds = 35                                                                                                                                                          | Fixed<br>1 x 20mins / day x 5 days                                                  | Pain intensity (NRS, pain item from Shoulder Pain and Disability Index) | Shoulder Pain and Disability Index                                                                                                                                                                  |
| Ratajczak et al., 2011 <sup>293</sup>  | P | Pr | Back pain – low, desmopathy                                  | 80 (57W)                      | TENS = 40                                                | Diadynamic currents = 40<br>Healthy participants groups (no TENS) = 40                                                                                                                                       | Fixed<br>1 x 30 mins / day x 5 days / week x 2 weeks<br>10 sessions                 | Pain intensity (VAS)                                                    | Functional pain index by Lequesne<br>Range of motion                                                                                                                                                |

08\_OL-TABLE1\_IncludedStudies

|                                             |   |    |                                                                       |           |                                             |                                                                                                                                        |                                                                                                    |                                 |                                                                                                                                      |    |    |    |    |    |    |    |    |    |    |    |    |    |    |    |    |    |    |    |    |    |    |    |    |    |    |    |    |    |    |    |    |
|---------------------------------------------|---|----|-----------------------------------------------------------------------|-----------|---------------------------------------------|----------------------------------------------------------------------------------------------------------------------------------------|----------------------------------------------------------------------------------------------------|---------------------------------|--------------------------------------------------------------------------------------------------------------------------------------|----|----|----|----|----|----|----|----|----|----|----|----|----|----|----|----|----|----|----|----|----|----|----|----|----|----|----|----|----|----|----|----|
| 1                                           | 2 | 3  | 4                                                                     | 5         | 6                                           | 7                                                                                                                                      | 8                                                                                                  | 9                               | 10                                                                                                                                   | 11 | 12 | 13 | 14 | 15 | 16 | 17 | 18 | 19 | 20 | 21 | 22 | 23 | 24 | 25 | 26 | 27 | 28 | 29 | 30 | 31 | 32 | 33 | 34 | 35 | 36 | 37 | 38 | 39 | 40 | 41 | 42 |
| Rawat et al., 1991 <sup>294</sup>           | P | Pr | Procedural pain - during biliary extracorporeal shockwave lithotripsy | 100       | TENS (MF, on back) = 25                     | Placebo TENS (0mA, on back) = 25<br>TENS (MF, back and acupoints on leg) = 25<br>Placebo TENS (0mA, on back and acupoints on leg) = 25 | PRN throughout procedure                                                                           | Pain intensity (5-point scale)  | Analgesic consumption                                                                                                                |    |    |    |    |    |    |    |    |    |    |    |    |    |    |    |    |    |    |    |    |    |    |    |    |    |    |    |    |    |    |    |    |
| Renovato França et al., 2019 <sup>295</sup> | P | Pr | Radiculopathy – lumbar disc herniation                                | 40 (25W)  | TENS = 20                                   | Exercises (Motor control training, SoC) = 20                                                                                           | Fixed 2 x 60 mins / week x 8 weeks<br>16 session                                                   | Pain intensity (VAS)            | McGill Pain Questionnaire<br>Oswestry Disability Index<br>Transversus Abdominis Activation Capacity                                  |    |    |    |    |    |    |    |    |    |    |    |    |    |    |    |    |    |    |    |    |    |    |    |    |    |    |    |    |    |    |    |    |
| Reuss et al., 1988 <sup>296</sup>           | P | Pr | Post-op cholecystectomy                                               | 64 (50W)  | TENS (HF) = 30                              | No treatment (+ meperidine on demand) = 34                                                                                             | PRN                                                                                                | No primary outcomes             | Analgesic consumption<br>Complications                                                                                               |    |    |    |    |    |    |    |    |    |    |    |    |    |    |    |    |    |    |    |    |    |    |    |    |    |    |    |    |    |    |    |    |
| Revadkar and Bhojwani, 2019 <sup>297</sup>  | P | Pr | Dysmenorrhea                                                          | 30 (30W)  | TENS (HF) + rescue medication = 15          | IFT + rescue medication = 15                                                                                                           | Fixed 1 x 20mins<br>1 session                                                                      | Pain intensity (NRS)            | None                                                                                                                                 |    |    |    |    |    |    |    |    |    |    |    |    |    |    |    |    |    |    |    |    |    |    |    |    |    |    |    |    |    |    |    |    |
| Ringel and Taubert, 1991 <sup>298</sup>     | P | Pr | Migraine                                                              | 57 (48W)  | TENS (NR) = 31                              | Ergocomb (prophylactic buccal tablets for migraine) (SoC, no TENS) = 26                                                                | PRN >1 x 30 mins / day as needed for 3 months                                                      | Pain intensity (4-point scale)  | Number of headache days                                                                                                              |    |    |    |    |    |    |    |    |    |    |    |    |    |    |    |    |    |    |    |    |    |    |    |    |    |    |    |    |    |    |    |    |
| Robb et al., 2007 <sup>299</sup>            | C | E  | Chronic pain associated with breast cancer treatment                  | 41 (411W) | TENS (HF) = 41                              | Placebo TENS (0mA) = 41<br>Transcutaneous spinal electroanalgesia = 41                                                                 | PRN >10-30 mins / day x 3 weeks                                                                    | Pain intensity (NRS) – from BPI | Analgesic consumption<br>BPI<br>Hospital Anxiety and Depression (HAD) Scale<br>Range of motion<br>Patient satisfaction questionnaire |    |    |    |    |    |    |    |    |    |    |    |    |    |    |    |    |    |    |    |    |    |    |    |    |    |    |    |    |    |    |    |    |
| Robinson et al., 2001 <sup>300</sup>        | P | E  | Procedural pain – colonoscopy                                         | 33 (NR)   | TENS (various F) + standard medication = 10 | Placebo TENS (0mA) + standard medication = 13<br>Standard medication (SoC, no TENS control) = 10                                       | Fixed 1 x 5mins pre-procedure, 1 x 5 mins during procedure, 1 x 5 mins post procedure<br>1 session | Pain intensity (NRS)            | Post-procedure evaluation questionnaire                                                                                              |    |    |    |    |    |    |    |    |    |    |    |    |    |    |    |    |    |    |    |    |    |    |    |    |    |    |    |    |    |    |    |    |
| Roche et al., 1985 <sup>301</sup>           | P | Pr | Haemophilia                                                           | 36 (NR)   | TENS (HF) = 28                              | Placebo TENS (0mA) = 8                                                                                                                 | PRN 1 x 25 mins continuous from recovery room for 5 days as needed                                 | Pain intensity (NRS)            | McGill Pain Questionnaire                                                                                                            |    |    |    |    |    |    |    |    |    |    |    |    |    |    |    |    |    |    |    |    |    |    |    |    |    |    |    |    |    |    |    |    |
| Rooney et al., 1983 <sup>302</sup>          | P | E  | Post-op – thoracotomy                                                 | 44 (17W)  | TENS (HF) = 22                              | Placebo TENS (0mA) = 22                                                                                                                | Fixed 1 x 25 mins<br>1 session                                                                     | No primary outcome              | Analgesic consumption – (Narcotic)                                                                                                   |    |    |    |    |    |    |    |    |    |    |    |    |    |    |    |    |    |    |    |    |    |    |    |    |    |    |    |    |    |    |    |    |
| Rosenberg et al., 1978 <sup>303</sup>       | P | Pr | Post-op cholecystectomy                                               | 12 (NR)   | TENS (HF) + analgesics = 6                  | Analgesics (SoC, no TENS control) = 6                                                                                                  | PRN 3 days as needed                                                                               | No primary outcome              | Analgesic consumption<br>Pulmonary function                                                                                          |    |    |    |    |    |    |    |    |    |    |    |    |    |    |    |    |    |    |    |    |    |    |    |    |    |    |    |    |    |    |    |    |
| Rutgers et al., 1988 <sup>304</sup>         | P | Pr | Postherpetic neuralgia                                                | 23 (13W)  | TENS (HF) = 13                              | Acupuncture = 10                                                                                                                       | PRN 3 x 30 mins / week x 1 week then as needed for 6 weeks                                         | Pain intensity (NRS)            | None                                                                                                                                 |    |    |    |    |    |    |    |    |    |    |    |    |    |    |    |    |    |    |    |    |    |    |    |    |    |    |    |    |    |    |    |    |
| Sadala et al., 2018 <sup>305</sup>          | P | E  | Procedural pain - during carboxytherapy                               | 84 (84W)  | TENS (HF) = 28                              | Placebo TENS (Fading) – 28<br>No treatment (Control) = 28                                                                              | Fixed 1 min / puncture<br>1 session                                                                | Pain intensity (VAS)            | None                                                                                                                                 |    |    |    |    |    |    |    |    |    |    |    |    |    |    |    |    |    |    |    |    |    |    |    |    |    |    |    |    |    |    |    |    |
| Sahin et al., 2011 <sup>306</sup>           | P | E  | Cervical myofascial pain syndrome                                     | 80 (40W)  | TENS (HF, conventional) = 20                | Placebo TENS (Fading) = 20<br>TENS (LF, acupuncture = like) = 20                                                                       | Fixed 1 x 30min/day x 3 / week                                                                     | Pain intensity (VAS)            | SF-36<br>Bodily pain subscale                                                                                                        |    |    |    |    |    |    |    |    |    |    |    |    |    |    |    |    |    |    |    |    |    |    |    |    |    |    |    |    |    |    |    |    |

08\_OL-TABLE1\_IncludedStudies

|                                              |   |    |                                                             |            |                                                                                 |                                                                                                          |                                                                   |                                                                               |                                                                                                                              |
|----------------------------------------------|---|----|-------------------------------------------------------------|------------|---------------------------------------------------------------------------------|----------------------------------------------------------------------------------------------------------|-------------------------------------------------------------------|-------------------------------------------------------------------------------|------------------------------------------------------------------------------------------------------------------------------|
|                                              |   |    |                                                             |            |                                                                                 | TENS (LF, burst) = 20                                                                                    | ?? no. weeks?<br>1 session                                        |                                                                               |                                                                                                                              |
| Samadzadeh et al., 2017 <sup>307</sup>       | P | Pr | Labour pain                                                 | 120 (120W) | TENS (HF, continuous, LF, burst) + meperidine as rescue analgesia = 40          | Entonox + meperidine as rescue analgesia = 40<br>TENS + Entonox + meperidine as rescue analgesia = 40    | PRN<br>During labour                                              | Pain intensity (VAS)                                                          | Analgesic consumption                                                                                                        |
| Sangtong et al., 2019 <sup>308</sup>         | P | Pr | Osteoarthritis - knee                                       | 148 (135W) | TENS (HF) + US = 64                                                             | US = 68                                                                                                  | Fixed<br>1 x 10 mins / day x 5 days x 2 weeks<br>10 session       | Pain intensity (NRS)<br>• At rest<br>• On movement (walking, climbing stairs) | 6-min walk test<br>Patient global assessment<br>Adverse events                                                               |
| Santamoto et al., 2013 <sup>309</sup>        | P | Pr | Botulinum toxin type A injection for post-stroke spasticity | 32 (18W)   | TENS (LF) = 16                                                                  | Shock wave therapy = 16                                                                                  | Fixed<br>1 x 30 mins / day x 2 / day x 5 days<br>10 sessions      | Pain intensity (VAS)                                                          | Spasticity scale<br>Spasm scale                                                                                              |
| Santana et al., 2016 <sup>310</sup>          | P | Pr | Labour pain                                                 | 46 (46W)   | TENS (HF) + routine obstetric care = 23                                         | Routine obstetric care (SoC, no TENS control) = 23                                                       | Fixed<br>1 x 30 mins / day x 5 days x 2 weeks<br>10 sessions      | Pain intensity (VAS)                                                          | Time to analgesic requirement<br>Pain location                                                                               |
| Saranya et al., 2019 <sup>311</sup>          | P | Pr | Muscle pain – Temporomandibular Masticatory Muscle Pain     | 60 (42W)   | TENS (HF) + jaw exercises + hot fomentation = 30                                | Microcurrent electrical stimulation + jaw exercises + hot fomentation = 30                               | Fixed<br>1 x 20min / day x 5 days<br>5 sessions                   | Pain intensity (VAS)                                                          | Mouth opening and functional assessment                                                                                      |
| Sayilir and Yildizgoren, 2017 <sup>312</sup> | P | Pr | Back pain - chronic low non-specific                        | 55 (32W)   | TENS (HF) = 26                                                                  | Diadynamic currents = 29                                                                                 | Fixed<br>1 x 30 mins / day x 5 days/week x 2 weeks<br>10 sessions | Pain intensity (VAS)<br>• Rest<br>• On movement                               | Roland Morris Disability Questionnaire<br>Oswestry Disability Index (ODI)<br>Hand finger floor distance (HFFD)               |
| Seo et al., 2013 <sup>313</sup>              | P | Pr | Chronic myofascial pain syndrome                            | 76 (64W)   | TENS (LF, burst) + Botulinum toxin A = 38                                       | Botulinum toxin A + electrical stimulation with muscle contraction = 38                                  | Fixed<br>1 x 30 mins / day x 3 days<br>3 sessions                 | Pain intensity (VAS)                                                          | Neck Pain and Disability Scale (NPAD)<br>Global Assessment of Improvement Scale (GAS)<br>Pressure algometry (pain threshold) |
| Serry et al., 2016 <sup>314</sup>            | P | Pr | Peripheral diabetic neuropathy                              | 60 (32W)   | TENS (HF) + pharmacological therapy = 20                                        | Pharmacological therapy (SoC, no TENS control) = 20<br>Exercise (aerobic) + pharmacological therapy = 20 | Fixed<br>1 x 30 mins / day x 3 / week x 8 weeks<br>24 sessions    | Pain intensity (VAS)                                                          | Nerve conduction studies                                                                                                     |
| Sezen et al., 2017 <sup>315</sup>            | P | Pr | Post-op thoracotomy                                         | 87 (25W)   | TENS (HF) + Analgesics (diclofenac i.m., tramadol i.v. + paracetamol i.v.) = 43 | Placebo TENS + Analgesics (diclofenac i.m., tramadol i.v. + paracetamol i.v.) = 44 (0mA)                 | PRN<br>During labour at 8 h intervals                             | Pain intensity (VAS)                                                          | Analgesic consumption<br>Pulse rate<br>Blood pressure<br>Saturation<br>Complication                                          |
| Shahoei et al., 2017 <sup>316</sup>          | P | Pr | Labour pain                                                 | 90 (90W)   | TENS (PRN) = 30                                                                 | Placebo TENS = 30 (0mA)<br>Routine care (SoC, no TENS control) = 30                                      | PRN<br>During labour                                              | Pain intensity (VAS)                                                          |                                                                                                                              |



08\_OL-TABLE1\_IncludedStudies

|    |                                            |   |    |                                                                       |          |                                                   |                                                                                                         |                                                                                                              |                                                                           |                                                                                                                                                                                                |
|----|--------------------------------------------|---|----|-----------------------------------------------------------------------|----------|---------------------------------------------------|---------------------------------------------------------------------------------------------------------|--------------------------------------------------------------------------------------------------------------|---------------------------------------------------------------------------|------------------------------------------------------------------------------------------------------------------------------------------------------------------------------------------------|
| 1  |                                            |   |    |                                                                       |          |                                                   |                                                                                                         |                                                                                                              |                                                                           |                                                                                                                                                                                                |
| 2  | Shehab and Adham, 2000 <sup>317</sup>      | P | Pr | Shoulder pain                                                         | 50 (50W) | TENS (HF) + cold pack + stretching exercises = 26 | Ultrasound therapy + cold pack + stretching exercises = 24                                              | Fixed<br>1 x 30 mins / day x 3 to 5 / week x 3 to 5 weeks<br>13 sessions                                     | Pain intensity (VAS)                                                      | Range of motion                                                                                                                                                                                |
| 3  |                                            |   |    |                                                                       |          |                                                   |                                                                                                         |                                                                                                              |                                                                           |                                                                                                                                                                                                |
| 4  |                                            |   |    |                                                                       |          |                                                   |                                                                                                         |                                                                                                              |                                                                           |                                                                                                                                                                                                |
| 5  |                                            |   |    |                                                                       |          |                                                   |                                                                                                         |                                                                                                              |                                                                           |                                                                                                                                                                                                |
| 6  | Sherry et al., 2001 <sup>318</sup>         | P | Pr | Back pain - chronic low non-specific                                  | 44 (21W) | TENS (NR) + analgesics if needed = 22             | Vertebral axial decompression = 22                                                                      | Fixed<br>1 x 10 mins / day x 20 days then 1 x 10 mins / week x 4 weeks<br>24 sessions                        | Pain intensity (VAS)                                                      | Disability (4-point scale)                                                                                                                                                                     |
| 7  |                                            |   |    |                                                                       |          |                                                   |                                                                                                         |                                                                                                              |                                                                           |                                                                                                                                                                                                |
| 8  |                                            |   |    |                                                                       |          |                                                   |                                                                                                         |                                                                                                              |                                                                           |                                                                                                                                                                                                |
| 9  |                                            |   |    |                                                                       |          |                                                   |                                                                                                         |                                                                                                              |                                                                           |                                                                                                                                                                                                |
| 10 |                                            |   |    |                                                                       |          |                                                   |                                                                                                         |                                                                                                              |                                                                           |                                                                                                                                                                                                |
| 11 | Shimoji et al., 2007 <sup>319</sup>        | P | E  | Back pain - chronic low non-specific                                  | 28 (24W) | TENS (HF) = 9                                     | Placebo TENS (0mA) = 8<br>TENS (Bidirectional modulated sine waves) = 11                                | Fixed<br>1 x 15 mins<br>1 session                                                                            | Pain intensity NRS                                                        | None                                                                                                                                                                                           |
| 12 |                                            |   |    |                                                                       |          |                                                   |                                                                                                         |                                                                                                              |                                                                           |                                                                                                                                                                                                |
| 13 | Shimoura et al., 2019 <sup>320</sup>       | P | E  | Osteoarthritis - knee                                                 | 50 (35W) | TENS (MF) = 25                                    | Placebo TENS = 25 (0mA)                                                                                 | Fixed<br>Details NR<br>1 session                                                                             | Pain intensity (VAS)<br>• on movement                                     | Climb test<br>Timed Up and Go (TUG)<br>6-minute walk test (6MWT)<br>Knee extensor strengths<br>2-step test<br>Stand-up test in the locomotive syndrome risk test.                              |
| 14 |                                            |   |    |                                                                       |          |                                                   |                                                                                                         |                                                                                                              |                                                                           |                                                                                                                                                                                                |
| 15 |                                            |   |    |                                                                       |          |                                                   |                                                                                                         |                                                                                                              |                                                                           |                                                                                                                                                                                                |
| 16 |                                            |   |    |                                                                       |          |                                                   |                                                                                                         |                                                                                                              |                                                                           |                                                                                                                                                                                                |
| 17 |                                            |   |    |                                                                       |          |                                                   |                                                                                                         |                                                                                                              |                                                                           |                                                                                                                                                                                                |
| 18 | Shoukry and Al-Ansary, 2019 <sup>321</sup> | P | Pr | Procedural pain - during Extracorporeal Shock-Wave Lithotripsy (ESWL) | 60 (26W) | TENS (HF) + IV fentanyl = 30                      | IV fentanyl = 30                                                                                        | Fixed<br>1 treatment<br>Duration not reported but less than 40 mins                                          | Pain intensity (VAS)                                                      | Analgesic consumption<br>Modified Post-Anaesthetic Discharge Scoring System<br>adverse effect during or after the procedure<br>Discharge time                                                  |
| 19 |                                            |   |    |                                                                       |          |                                                   |                                                                                                         |                                                                                                              |                                                                           |                                                                                                                                                                                                |
| 20 |                                            |   |    |                                                                       |          |                                                   |                                                                                                         |                                                                                                              |                                                                           |                                                                                                                                                                                                |
| 21 |                                            |   |    |                                                                       |          |                                                   |                                                                                                         |                                                                                                              |                                                                           |                                                                                                                                                                                                |
| 22 |                                            |   |    |                                                                       |          |                                                   |                                                                                                         |                                                                                                              |                                                                           |                                                                                                                                                                                                |
| 23 |                                            |   |    |                                                                       |          |                                                   |                                                                                                         |                                                                                                              |                                                                           |                                                                                                                                                                                                |
| 24 | Siemens et al., 2020 <sup>322</sup>        | C | Pr | Cancer pain - advanced cancer, inpatients                             | 25 (12W) | TENS (HF) + medication = 20                       | Placebo TENS (0mA) + medication = 20                                                                    | PRN<br>For 1 day<br>Mean $\pm$ SD = 9.1 $\pm$ 7.5h for TENS and 7 $\pm$ 5.6 for placebo<br>24 h washout<br>. | Pain intensity (NRS)                                                      | Analgesic consumption<br>Brief Pain Inventory (BPI)<br>Edmonton Classification System for Cancer Pain Douleur Neuropathique en 4 Questions<br>7-point verbal pain rating scale<br>EORTC QLQC30 |
| 25 |                                            |   |    |                                                                       |          |                                                   |                                                                                                         |                                                                                                              |                                                                           |                                                                                                                                                                                                |
| 26 |                                            |   |    |                                                                       |          |                                                   |                                                                                                         |                                                                                                              |                                                                           |                                                                                                                                                                                                |
| 27 |                                            |   |    |                                                                       |          |                                                   |                                                                                                         |                                                                                                              |                                                                           |                                                                                                                                                                                                |
| 28 |                                            |   |    |                                                                       |          |                                                   |                                                                                                         |                                                                                                              |                                                                           |                                                                                                                                                                                                |
| 29 |                                            |   |    |                                                                       |          |                                                   |                                                                                                         |                                                                                                              |                                                                           |                                                                                                                                                                                                |
| 30 | Sikiru et al., 2008 <sup>323</sup>         | P | Pr | Pelvic pain, prostatitis - chronic                                    | 24 (24M) | TENS (HF) + antibiotics = 8                       | Placebo pill + antibiotics = 8<br>Analgesics (Ibuprofen 400mg) + antibiotics (SoC, no TENS control) = 8 | Fixed<br>1 x 20 mins / day x 5 / week x 4 weeks<br>20 sessions                                               | Pain intensity (NRS)                                                      | NIH chronic prostatitis symptom index questionnaire (pain domain)                                                                                                                              |
| 31 |                                            |   |    |                                                                       |          |                                                   |                                                                                                         |                                                                                                              |                                                                           |                                                                                                                                                                                                |
| 32 |                                            |   |    |                                                                       |          |                                                   |                                                                                                         |                                                                                                              |                                                                           |                                                                                                                                                                                                |
| 33 | Silva et al., 2012 <sup>324</sup>          | P | Pr | Post-op cholecystectomy                                               | 42 (39W) | TENS (HF) + analgesics (Tramadol + Dipyron) = 21  | Placebo TENS (0mA) + analgesics (Tramadol + Dipyron) = 21                                               | PRN<br>1 x 30 mins / session as needed                                                                       | Pain intensity (VAS, verbal NRS)                                          | Occurrence of nausea and emesis                                                                                                                                                                |
| 34 |                                            |   |    |                                                                       |          |                                                   |                                                                                                         |                                                                                                              |                                                                           |                                                                                                                                                                                                |
| 35 | Silva et al., 2014 <sup>325</sup>          | P | E  | Post-mastectomy pain syndrome – chronic, intercostobrachial           | 18 (18W) | TENS (LF, burst) = 9                              | TENS (MF, acupuncture-like,) = 9                                                                        | Fixed<br>1 x 10-15 mins<br>1 session                                                                         | Pain intensity (VAS)                                                      | Electroencephalography (EEG) measures                                                                                                                                                          |
| 36 |                                            |   |    |                                                                       |          |                                                   |                                                                                                         |                                                                                                              |                                                                           |                                                                                                                                                                                                |
| 37 |                                            |   |    |                                                                       |          |                                                   |                                                                                                         |                                                                                                              |                                                                           |                                                                                                                                                                                                |
| 38 | Sim, 1991 <sup>326</sup>                   | P | Pr | Post-op cholecystectomy                                               | 30 (27W) | TENS (HF) + analgesics (Papaveretum) = 15         | Papaveretum, i.m. on demand (SoC, no TENS control) = 15                                                 | PRN<br>1 x 60 mins / day? x 5 days<br>5 sessions                                                             | Pain intensity (VAS)<br>• Resting pain<br>• Coughing<br>• Deep breathing. | Analgesic consumption<br>Spirometer function                                                                                                                                                   |
| 39 |                                            |   |    |                                                                       |          |                                                   |                                                                                                         |                                                                                                              |                                                                           |                                                                                                                                                                                                |
| 40 |                                            |   |    |                                                                       |          |                                                   |                                                                                                         |                                                                                                              |                                                                           |                                                                                                                                                                                                |
| 41 |                                            |   |    |                                                                       |          |                                                   |                                                                                                         |                                                                                                              |                                                                           |                                                                                                                                                                                                |
| 42 |                                            |   |    |                                                                       |          |                                                   |                                                                                                         |                                                                                                              |                                                                           |                                                                                                                                                                                                |
| 43 |                                            |   |    |                                                                       |          |                                                   |                                                                                                         |                                                                                                              |                                                                           |                                                                                                                                                                                                |
| 44 |                                            |   |    |                                                                       |          |                                                   |                                                                                                         |                                                                                                              |                                                                           |                                                                                                                                                                                                |
| 45 |                                            |   |    |                                                                       |          |                                                   |                                                                                                         |                                                                                                              |                                                                           |                                                                                                                                                                                                |
| 46 |                                            |   |    |                                                                       |          |                                                   |                                                                                                         |                                                                                                              |                                                                           |                                                                                                                                                                                                |

08\_OL-TABLE1\_IncludedStudies

|                                        |   |    |                                              |            |                                                           |                                                                                                                                    |                                                                                                        |                                          |                                                                                                                               |
|----------------------------------------|---|----|----------------------------------------------|------------|-----------------------------------------------------------|------------------------------------------------------------------------------------------------------------------------------------|--------------------------------------------------------------------------------------------------------|------------------------------------------|-------------------------------------------------------------------------------------------------------------------------------|
| Siqueira et al., 2019 <sup>327</sup>   | P | Pr | Musculoskeletal pain – behavioural dysphonia | 27 (27W)   | TENS (LF) + vocal training                                | Placebo TENS (0mA) + vocal therapy                                                                                                 | Fixed<br>1 x 20mins / day<br>12 sessions                                                               | Pain intensity (VAS)                     | Self-perception of musculoskeletal pain frequency (4-point Likert scale) and intensity<br>Pressure algometry - Pain Threshold |
| Sloan et al., 1986 <sup>328</sup>      | P | Pr | Rib fracture                                 | 24 (NR)    | TENS (HF) + paracetamol + dihydrocodeine as required = 12 | Naproxen + paracetamol + dihydrocodeine as required (SoC, no TENS control) = 12                                                    | PRN<br>2 post op days                                                                                  | Pain intensity (VAS)                     | Pain relief (VAS)<br>Arterial blood assays<br>Peak expiratory flow rate<br>Treatment effectiveness (VAS)                      |
| Smania et al., 2005 <sup>329</sup>     | P | Pr | Myofascial pain syndrome                     | 53 (36W)   | TENS (HF) = 18                                            | Placebo (ultrasound turned off) = 18<br>Repetitive magnetic stimulation = 17                                                       | Fixed<br>1 x 20 mins / day x 5 days / week x 2 weeks<br>10 sessions                                    | Pain intensity (Pain and disability VAS) | Pressure pain threshold (algometry)<br>Range of motion                                                                        |
| Smedley et al., 1988 <sup>330</sup>    | P | Pr | Post-op inguinal herniorrhaphy               | 62 (62W)   | TENS (HF) + Omnopon = 34                                  | Placebo TENS (0mA) + Omnopon = 28                                                                                                  | PRN<br>2 days continuously post op<br>Unclear                                                          | Pain intensity (VAS)                     | Analgesic consumption<br>Expiratory flow                                                                                      |
| Smith et al., 1983 <sup>331</sup>      | P | Pr | Osteoarthritis - knee                        | 30 (20W)   | TENS (HF) = 15                                            | Placebo TENS (0mA) = 15                                                                                                            | Fixed<br>1 x 20 mins / day x 8 occasions over 4 weeks<br>8 sessions                                    | Pain intensity (VAS)                     | Analgesic consumption<br>Pain chart<br>Sleep disturbance (VAS)                                                                |
| Smith et al., 1986 <sup>332</sup>      | P | Pr | Post-caesarean pain                          | 18 (18W)   | TENS (HF) + analgesics = 9                                | Placebo TENS (0mA) + analgesics = 9                                                                                                | PRN<br>Continuous with 15 mins rest for 3 days post up                                                 | Pain intensity (5-point scale)           | Analgesic consumption<br>McGill Pain Questionnaire                                                                            |
| Sodipo et al., 1980 <sup>333</sup>     | P | Pr | Post-op                                      | 30 (NR)    | TENS (NR) + analgesics = 15                               | Narcotic medication (SoC, no TENS control) = 15                                                                                    | PRN<br>2 days post op                                                                                  | No primary outcome                       | Analgesic consumption<br>Pulmonary function                                                                                   |
| Solak et al., 2007 <sup>334</sup>      | P | Pr | Post-op thoracotomy                          | 40 (8W)    | TENS (LF) + (no morphine PCA) = 20                        | Morphine (PCA) (SoC, no TENS control) = 20                                                                                         | Fixed<br>1 x 30 mins / day ? x 10 days<br>10 sessions                                                  | Pain intensity (VAS)                     | Analgesic consumption (Morphine - PCA)<br>Prince Henry pain scale<br>Pulmonary function                                       |
| Solak et al., 2009 <sup>335</sup>      | P | Pr | Post-op coronary bypass grafting             | 100 (13W)  | TENS (HF, continuously) + morphine (PCA) = 25             | Placebo TENS + morphine (PCA) = 25<br>Morphine (PCA)(SoC, no TENS control) = 25<br>TENS (HF, intermittently) + morphine (PCA) = 25 | PRN<br>continuously one day<br>Continuously = on for 24h without break Intermittently = 1h on 1 hr off | Pain intensity (VAS)                     | Analgesic consumption<br>Duration operation, extubation, hospital stay<br>Oximetry<br>Respiratory function                    |
| Sonde et al., 1998 <sup>336</sup>      | P | Pr | Post stroke – shoulder pain                  | 44 (17W)   | TENS (LF) + Physiotherapy (usual care) = 26               | Physiotherapy (SoC, no TENS control) = 18                                                                                          | Fixed<br>1 x 60 mins / day x 5 days / week x 12 weeks<br>60 sessions                                   | Pain intensity (VAS)                     | Fugl-Meyer Ashworth scale<br>Autonomy in activities of daily living                                                           |
| Stepanovic et al., 2015 <sup>337</sup> | P | Pr | Post-herpetic neuralgia                      | 222 (133W) | TENS (HF) = 36                                            | Analgesics (SoC, no TENS control) = 38<br>Antiviral agents = 71<br>TENS + antiviral agents = 77                                    | Fixed<br>1 x 30 mins / day<br>10 to 15 sessions                                                        | Pain intensity (VAS)                     | Analgesic consumption<br>Allodynia, hyperalgesia or paraesthesia                                                              |
| Stephoe and Bo, 1984 <sup>338</sup>    | P | Pr | Labour pain                                  | 25 (25W)   | TENS (HF + LF) = 12                                       | Placebo TENS (0mA) = 13                                                                                                            | PRN                                                                                                    | Pain intensity                           | Analgesic consumption                                                                                                         |

08\_OL-TABLE1\_IncludedStudies

|                                            |   |    |                                                      |            |                                                   |                                                                                                                                                                                                                           |                                                                   |                                                    |                                                                                                                                                                                                    |
|--------------------------------------------|---|----|------------------------------------------------------|------------|---------------------------------------------------|---------------------------------------------------------------------------------------------------------------------------------------------------------------------------------------------------------------------------|-------------------------------------------------------------------|----------------------------------------------------|----------------------------------------------------------------------------------------------------------------------------------------------------------------------------------------------------|
|                                            |   |    |                                                      |            |                                                   |                                                                                                                                                                                                                           | 1 x 30 mins?                                                      |                                                    |                                                                                                                                                                                                    |
| Stratton and Smith, 1980 <sup>339</sup>    | P | Pr | Plantar fasciitis                                    | 26 (NR)    | TENS (HF) + exercise (stretching) + orthoses = 13 | Exercise (stretching) + orthoses (SoC, no TENS control) = 13                                                                                                                                                              | Fixed<br>1 x 20 mins / day x 7 days x 4 weeks<br>28 sessions      | Pain intensity (VAS)                               | Activities of daily living subscale of Foot and Ankle Ability Measure                                                                                                                              |
| Stubbing and Jellicoe, 1988 <sup>340</sup> | P | Pr | Post-op thoracotomy                                  | 40 (12W)   | TENS (HF) + opioids (Papaveretum, i.v.) = 20      | Papaveretum (i.v.) (SoC, no TENS control) = 20                                                                                                                                                                            | PRN for 48 hours                                                  | Pain intensity (5-categories)                      | Analgesic consumption<br>Time to transfer to oral analgesia<br>Peak expiratory flow rate                                                                                                           |
| Suh et al., 2015 <sup>341</sup>            | P | Pr | Musculoskeletal pain - (various types, work-related) | 47 (36W)   | TENS (HF) = 24                                    | Placebo TENS = 23 (0mA)                                                                                                                                                                                                   | Fixed<br>1 x 60 mins<br>1 session                                 | Pain intensity (VAS)<br>• resting<br>• on movement | Pressure pain threshold (algometry)<br>Range of motion<br>Fatigue (VAS)<br>• Resting pain<br>• Pain on movement                                                                                    |
| Talbot et al., 2020 <sup>342</sup>         | P | Pr | Knee pain, Patellofemoral pain syndrome              | 130 (29W)  | TENS (HF) + exercise (home programme) = 33        | Exercise (home programme) alone (SoC) = 34<br><br>Neuromuscular electrical stimulation + exercise (home programme) = 33<br><br>Alternating Neuromuscular electrical stimulation and TENS + exercise (home programme) = 30 | Fixed<br>1x 20 mins / day<br>1 x every 2 days<br>X 9 weeks        | Pain intensity (VAS)                               | Lower Extremity Isometric Strength<br>30-Second Chair Stand Test (30-SCST)<br>Timed Stair Climb Test (SCT)<br>Forward Step-Down Test<br>Six-Minute Timed Walk Test (6-MWT)                         |
| Tantawy et al., 2018 <sup>343</sup>        | P | Pr | Chronic orchialgia                                   | 71 (0W)    | TENS (HF) + analgesic medication = 36             | Analgesic medication (SoC, no TENS control) = 35                                                                                                                                                                          | Fixed<br>1 x 30 mins / day x 5 / week x 4 weeks<br>20 sessions    | Pain intensity (VAS)                               | Pin prick<br>Quality of life                                                                                                                                                                       |
| Taylor et al., 1981 <sup>344</sup>         | C | E  | Osteoarthritis - knee                                | 10 (9W)    | TENS (Freq. PRN) = 10                             | Placebo TENS (0mA) = 10                                                                                                                                                                                                   | PRN<br>1 x 30 to 60 mins or continuously / day 2 weeks at home    | Pain intensity (5-point category scale)            | Analgesic consumption (5 categories)<br>Ambulation (5 categories)                                                                                                                                  |
| Taylor et al., 1983 <sup>345</sup>         | P | Pr | Post op abdominal surgery                            | 77 (45W)   | TENS (HF) + analgesics = 30                       | Placebo TENS (0mA) + analgesics = 22<br>Analgesic medication (SoC, no TENS control) = 25                                                                                                                                  | Fixed<br>1 x 60 mins x 4 / day (q4h) x 3 post days<br>12 sessions | Pain intensity (NRS)                               | Analgesic consumption (Morphine)<br>Physiological depression<br>Patient ambulation<br>Fluid intake                                                                                                 |
| Thakur and Patidar, 2004 <sup>346</sup>    | P | Pr | Labour pain                                          | 300 (300W) | TENS (HF) = 100                                   | No treatment = 100<br>Tramadol (100mg) = 100                                                                                                                                                                              | PRN                                                               | No primary outcome                                 | Pain relief (5 categories)<br>Time taken for onset of analgesic action<br>Duration of analgesia                                                                                                    |
| Thomas et al., 1988 <sup>347</sup>         | P | Pr | Labour pain                                          | 280 (280W) | TENS (NR) = 132                                   | Placebo TENS (0mA) = 148                                                                                                                                                                                                  | PRN                                                               | Pain intensity (VAS)                               | Analgesic consumption<br>Labour questionnaire                                                                                                                                                      |
| Thomas et al., 1995 <sup>348</sup>         | C | E  | Dysmenorrhea - primary                               | 29 (29W)   | TENS (HF) = 12                                    | Placebo TENS (0mA) = 12<br>TENS (LF) = 12                                                                                                                                                                                 | Fixed<br>1 x 20 mins / day x 2 days<br>2 sessions                 | Pain intensity (VAS)                               | Analgesic consumption<br>Patients perception of improvement (3 category scale)<br>Blood loss (3 category scale)<br>Nausea and vomiting (4 category scale)<br>Hours of work lost (3 category scale) |

08\_OL-TABLE1\_IncludedStudies

|                                           |   |    |                                        |          |                                                            |                                                                                                                                              |                                                                                                                                    |                                                                   |                                                                                                                                                                                                                 |
|-------------------------------------------|---|----|----------------------------------------|----------|------------------------------------------------------------|----------------------------------------------------------------------------------------------------------------------------------------------|------------------------------------------------------------------------------------------------------------------------------------|-------------------------------------------------------------------|-----------------------------------------------------------------------------------------------------------------------------------------------------------------------------------------------------------------|
| Thorsteinsson et al., 1978 <sup>349</sup> | C | E  | Chronic pain                           | 93 (53W) | TENS (NR) = 93                                             | Placebo TENS = 93 (0mA)                                                                                                                      | Fixed<br>1 x treatment at each of the following (i) at painful site (ii) over main nerve bundle (iii) at remote site<br>3 sessions | No primary outcomes                                               | Pain relief (4-categories)<br>• Minnesota<br>• Multiphasic<br>• Personality Inventory<br>• Duration of pain relief                                                                                              |
| Tilak et al., 2016 <sup>350</sup>         | P | Pr | Phantom limb pain                      | 26 (3W)  | TENS (LF, burst) = 13                                      | MVF = 13                                                                                                                                     | Fixed<br>1 x 20 mins x 4 days<br>4 sessions                                                                                        | Pain intensity (VAS)                                              | Universal pain score                                                                                                                                                                                            |
| Tokuda et al., 2014 <sup>351</sup>        | P | Pr | Post-op abdominal                      | 48 (19W) | TENS (HF) + Fentanyl (PCA) + No TENS (Control) = 16        | Placebo TENS (fading) + Fentanyl (PCA) = 16<br>Fentanyl (PCA) (SoC, no TENS control) = 16                                                    | PRN<br>1 x 60 min/day x 3 days                                                                                                     | Pain intensity (VAS)<br>• Resting pain<br>• Coughing<br>• Seating | Pulmonary Functions                                                                                                                                                                                             |
| Tonella et al., 2006 <sup>352</sup>       | P | E  | Post-op abdominal                      | 48 (20W) | TENS (HF) + usual care (analgesics and physiotherapy) = NR | Placebo TENS (0mA) + usual care (analgesics and physiotherapy) = NR<br>Usual care ((analgesics and physiotherapy) SoC, no TENS control) = NR | Fixed<br>1 x 30 mins for one day?<br>1 session                                                                                     | Pain intensity (VAS)                                              | Analgesic consumption                                                                                                                                                                                           |
| Topuz et al., 2004 <sup>353</sup>         | P | Pr | Back pain - chronic low non-specific   | 60 (41W) | TENS (HF, conventional) = 15                               | Placebo TENS (0mA) = 12<br>TENS (LF) = 15<br>Percutaneous neuromodulation therapy = 13                                                       | Fixed<br>1 x 20 min/day x 5 days x 2 weeks<br>10 sessions                                                                          | Pain intensity (VAS)<br>• Resting<br>• On movement                | Low back pain outcome scale<br>Oswestry disability index<br>Beck Depression Inventory                                                                                                                           |
| Tosato et al., 2007 <sup>354</sup>        | P | E  | Temporomandibular disorders            | 20 (20W) | TENS (NR) = 10                                             | Massage therapy = 10                                                                                                                         | Fixed<br>1 x 30 mins<br>1 session                                                                                                  | Pain intensity (VAS)                                              | Electromyography (EMG) measures                                                                                                                                                                                 |
| Treacy, 1999 <sup>355</sup>               | P | Pr | Bruxism                                | 23 (10W) | TENS (LF) = 8                                              | Placebo TENS (0mA) = 8<br>Relaxation (muscular awareness training) = 8                                                                       | Fixed<br>20 to 30 mins / day x 2 / week x 4 months<br>20 sessions                                                                  | No primary outcome                                                | Muscle pain from physical examination<br>Degree of discomfort (7-point scale)<br>EMG<br>Cognitive-Somatic Anxiety Questionnaire<br>Beck Depression Inventory<br>Multidimensional health locus of control scales |
| Tsen et al., 2000 <sup>356</sup>          | P | Pr | Labour pain                            | 40 (40W) | TENS (MF) = NR                                             | Placebo TENS (0mA) = NR                                                                                                                      | PRN<br>During labour<br>1 session                                                                                                  | Pain intensity (VAS)                                              | Duration of analgesia<br>Pin Prick                                                                                                                                                                              |
| Tsen et al., 2001 <sup>357</sup>          | P | Pr | Labour pain                            | 40 (40W) | TENS (MF) = NR                                             | Placebo TENS (0mA) = NR                                                                                                                      | PRN<br>During labour<br>1 session                                                                                                  | Pain intensity (VAS)                                              | Duration of analgesia<br>Pin Prick                                                                                                                                                                              |
| Tsukayama et al., 2002 <sup>358</sup>     | P | Pr | Back pain - chronic low non-specific   | 20 (16W) | TENS (LF) = 10                                             | Electroacupuncture = 9                                                                                                                       | Fixed<br>1 x 15 mins / day x 2 / week x 2 weeks<br>4 sessions                                                                      | Pain intensity (VAS)                                              | Back pain profile<br>Adverse events                                                                                                                                                                             |
| Tucker et al., 2015 <sup>359</sup>        | P | Pr | Procedural pain - bone marrow sampling | 70 (32W) | TENS (HF) = 35                                             | Placebo TENS (sub threshold) = 35                                                                                                            | Fixed                                                                                                                              | Pain intensity (NRS)                                              | Treatment perception questionnaire                                                                                                                                                                              |

08\_OL-TABLE1\_IncludedStudies

|                                           |   |    |                                         |          |                                                                                  |                                                                                                                  |                                                                                                   |                                                                                            |                                                                                                      |
|-------------------------------------------|---|----|-----------------------------------------|----------|----------------------------------------------------------------------------------|------------------------------------------------------------------------------------------------------------------|---------------------------------------------------------------------------------------------------|--------------------------------------------------------------------------------------------|------------------------------------------------------------------------------------------------------|
|                                           |   |    |                                         |          |                                                                                  |                                                                                                                  | throughout procedure<br>1 session                                                                 |                                                                                            |                                                                                                      |
| Tugay et al., 2007 <sup>360</sup>         | P | E  | Dysmenorrhea - primary                  | 32 (32W) | TENS (HF) = 17                                                                   | IFT = 15                                                                                                         | Fixed<br>1 x 20 mins<br>1 session                                                                 | Pain intensity (VAS)<br>• Menstrual pain<br>• Referred lower limbs pain<br>• Low back pain | None                                                                                                 |
| Tulgar et al., 1991 <sup>361</sup>        | C | E  | Several painful conditions              | 27 (11W) | TENS (HF, conventional) = 27                                                     | TENS (LF, burst = 27<br>TENS (modulated frequency) = 27                                                          | Fixed<br>1 x 30 mins / day<br>switch next day 3 days                                              | Pain intensity (VAS)                                                                       | None                                                                                                 |
| Tulgar et al., 1991 <sup>362</sup>        | C | E  | Several painful conditions              | 14 (7W)  | TENS (HF, conventional) = 14                                                     | TENS (LF, burst) = 27<br>TENS (high rate frequency modulation) = 27<br>TENS (low rate frequency modulation) = 27 | Fixed<br>1 x 20 mins / day<br>switch each day 4 days equals 4 tests<br>1 session                  | Pain intensity (VAS)                                                                       | Duration of pain relief                                                                              |
| Unterrainer et al., 2010 <sup>363</sup>   | P | Pr | Post-op lumbar                          | 38 (19W) | TENS + PCA = 13                                                                  | Placebo TENS + PCA (control) = 11<br><br>Placebo TENS + PCA (Pre) + TENS + PCA (post) = 14                       | Fixed<br>1 x 30 mins pre-op +<br>1 x 8 hours post-op<br>+ 1 x 30 mins post-op day 1<br>2 sessions | Pain intensity (VAS)                                                                       | Analgesic consumption<br>Mini Mental State Examination<br>The Short Cognitive Performance Test       |
| Unterrainer et al., 2012 <sup>364</sup>   | P | Pr | Post-op lumbar interbody fusion         | 35 (17W) | TENS (HF) + placebo PCA = 17                                                     | PCA (piritamide) + Placebo TENS (0mA) (SoC, sham TENS control) = 18                                              | Fixed<br>1 x 30 mins pre-op<br>1 x 24 hours post up<br>1 session                                  | Pain intensity (VAS)                                                                       | Analgesic consumption (PCA - rescue meds)                                                            |
| Upton et al., 2017 <sup>365</sup>         | C | E  | Peripheral diabetic neuropathy          | 5        | TENS (HF, conventional) = 5                                                      | TENS (LF, acupuncture-like) = 5                                                                                  | Fixed<br>1 x 30 mins / day x<br>10 days<br>10 sessions                                            | Pain intensity (NRS)                                                                       | McGill Pain Questionnaire<br>Mechanical detection threshold<br>Patient's Global Impression of Change |
| Vaidya, 2018 <sup>366</sup>               | P | Pr | Pregnancy induced posterior pelvic pain | 30 (30W) | TENS (HF) = 15                                                                   | Mobilisation of sacroiliac Joint = 15                                                                            | Fixed<br>1 x 30 mins / day x 3 / week<br>5 sessions                                               | Pain intensity (VAS)                                                                       | Roland Morris disability Questionnaire                                                               |
| Vaillancourt et al., 2019 <sup>367</sup>  | P | Pr | Chronic pain - Various                  | 18 (18W) | TENS (HF) + exercise = 7                                                         | Placebo TENS (0mA) + exercise = 8                                                                                | Fixed<br>2 x 45mins / session<br>x 2 / week<br>x 4 weeks,<br>8 sessions                           | Pain intensity (NRS)                                                                       | Short-Form<br>McGill Pain Questionnaire<br>Brief Pain Inventory<br>Beck Depression Inventory         |
| Valenza et al., 2016 <sup>368</sup>       | P | E  | Knee pain - anterior                    | 84 (52W) | TENS = 28                                                                        | No treatment = 28<br>Stretching = 28                                                                             | Fixed<br>1 x 20 mins<br>1 session                                                                 | No primary outcome                                                                         | Analgesic consumption<br>Roland Morris disability score<br>Pressure algometry                        |
| van der Ploeg et al., 1996 <sup>369</sup> | P | Pr | Labour pain                             | 94 (94W) | TENS (HF, continuous + LF, burst) + analgesics (pethidine/promethazine PCA) = 46 | Placebo TENS (NR) + analgesics (pethidine/promethazine, PCA) = 48                                                | PRN                                                                                               | Pain intensity (VAS)                                                                       | Duration of stages of labour<br>Mode of delivery,<br>Foetal status<br>Apgar scores                   |

08\_OL-TABLE1\_IncludedStudies

|                                           |   |    |                                                     |          |                                                                          |                                                                                                                                                                             |                                                                |                                                                                                         |                                                                                                                                                                                                          |
|-------------------------------------------|---|----|-----------------------------------------------------|----------|--------------------------------------------------------------------------|-----------------------------------------------------------------------------------------------------------------------------------------------------------------------------|----------------------------------------------------------------|---------------------------------------------------------------------------------------------------------|----------------------------------------------------------------------------------------------------------------------------------------------------------------------------------------------------------|
| van der Spank et al., 2000 <sup>370</sup> | P | E  | Labour pain                                         | 59 (94W) | TENS (HF, continuous, burst) + Epidural (drug NR) = 24                   | Epidural (drug NR) (SoC, no TENS control) = 35                                                                                                                              | PRN                                                            | Pain intensity (VAS)                                                                                    | Analgesic consumption<br>TENS satisfaction questionnaire                                                                                                                                                 |
| Vance et al., 2012 <sup>371</sup>         | P | E  | Osteoarthritis - knee                               | 75 (46W) | TENS (HF) = 25                                                           | Placebo TENS (Fading) = 25<br>TENS (LF) = 25                                                                                                                                | Fixed<br>1 x 40 to 50 mins<br>1 session                        | Pain intensity (VAS)<br>• Rest<br>• On movement (Timed-up-and-go)<br>• Heat evoked - temporal summation | Quantitative sensory testing<br>Pressure algometry, Cutaneous mechanical pain threshold, pressure pain threshold (PPT), heat pain threshold, heat temporal summation]<br>Timed up and go                 |
| Vitalii and Oleg, 2014 <sup>372</sup>     | P | Pr | Neuropathic pain associated with spinal cord injury | 21 (2W)  | TENS (LF) + gabapentin = 11                                              | Placebo TENS (no current stimulation) + gabapentin = 10                                                                                                                     | Fixed<br>1 x 30 mins / day x 10 days<br>10 sessions            | Pain intensity (VAS)                                                                                    | Analgesic consumption                                                                                                                                                                                    |
| Vrouva et al., 2019 <sup>373</sup>        | P | Pr | Rotator cuff                                        | 42 (20W) | TENS (HF) + kinesiotherapy                                               | microcurrent electrical nerve stimulation + kinesiotherapy                                                                                                                  | Fixed<br>1 x 20 mins / day x 5 / week x 3 weeks<br>15 sessions | Pain intensity (NRS)                                                                                    | Shoulder pain and disability index (SPADI)<br>EuroQoL-5 (Quality of life)                                                                                                                                |
| Walker et al., 1991 <sup>374</sup>        | P | Pr | Post-op (rehabilitation - total knee arthroplasty)  | 48 (NR)  | TENS (HF) + continuous passive motion + analgesic (various opioids) = 18 | TENS (subthreshold) + continuous passive motion + analgesics (various opioids) = 18<br>Continuous passive motion + analgesics (various opioids) (SoC, no TENS control) = 12 | PRN<br>continuously 3 days post op                             | No primary outcome                                                                                      | Analgesic consumption                                                                                                                                                                                    |
| Wang et al., 2009 <sup>375</sup>          | C | E  | Dysmenorrhea - primary                              | 21 (21W) | TENS (HF) = 21                                                           | Placebo TENS (0mA) = 21                                                                                                                                                     | Fixed<br>1 to 2 x 30 mins / day x 2 days                       | Pain intensity (NRS, 11-point scale)                                                                    | Pain location<br>Autonomic and related symptoms questionnaire<br>SF-36                                                                                                                                   |
| Warfield et al., 1985 <sup>376</sup>      | P | Pr | Post-op thoracotomy                                 | 24 (NR)  | TENS (NR) + opioids = 12                                                 | Placebo TENS (0mA) + opioids = 12                                                                                                                                           | PRN<br>Continuous stimulation x ? days                         | Pain intensity (NRS)                                                                                    | Analgesic consumption<br>Ability to tolerate chest physical therapy (3 categories)<br>Recovery room stay                                                                                                 |
| Warke et al., 2004 <sup>377</sup>         | P | Pr | Back pain – low, multiple sclerosis                 | 15 (NR)  | TENS (HF) = 5                                                            | Placebo TENS (0mA) = 5<br>TENS (LF) = 5                                                                                                                                     | Fixed<br>1 x > 45 mins/day x 6 weeks<br>>42 sessions           | Pain intensity (VAS)                                                                                    | Roland Morris Disability Questionnaire<br>Barthel Activities of Daily Living<br>Rivermead Mobility Index<br>McGill Pain Questionnaire<br>Leeds Multiple Sclerosis Quality of Life Questionnaire<br>SF-36 |
| Warke et al., 2006 <sup>378</sup>         | P | Pr | Back pain – low, multiple sclerosis                 | 90 (69W) | TENS (HF) = 30                                                           | Placebo TENS (0mA) = 30<br>TENS (LF) = 30                                                                                                                                   | PRN<br>>2 x 45 mins / day x 6 weeks<br>>42 sessions            | Pain intensity (VAS)                                                                                    | Analgesic consumption<br>McGill Pain Questionnaire<br>Roland Morris Disability Questionnaire<br>Barthel Index<br>Rivermead Mobility Index<br>Multiple Sclerosis Quality of Life-54 Instrument            |



08\_OL-TABLE1\_IncludedStudies

|                                            |   |    |                                                             |            |                                                |                                                                                                       |                                                                |                                                                   |                                                                                                     |
|--------------------------------------------|---|----|-------------------------------------------------------------|------------|------------------------------------------------|-------------------------------------------------------------------------------------------------------|----------------------------------------------------------------|-------------------------------------------------------------------|-----------------------------------------------------------------------------------------------------|
| Yameen et al., 2011 <sup>379</sup>         | P | Pr | Neuralgia - trigeminal                                      | 31 (20W)   | TENS (HF, continuous pattern) = 16             | TENS (LF, Burst) = 15                                                                                 | PRN x 3 weeks                                                  | Pain intensity (VAS)                                              | None                                                                                                |
| Yesil et al., 2018 <sup>380</sup>          | P | Pr | Neck pain - chronic non-specific                            | 81 (56W)   | TENS (HF) + Exercise (neck stabilisation) = 27 | Exercise (neck stabilisation) (SoC, no TENS control) = 26<br>IFT + Exercise (neck stabilisation) = 27 | Fixed<br>1 x 25 mins / day x 5 / week x 3 weeks<br>15 sessions | Pain intensity (VAS)                                              | Range of motion<br>Neck Disability index<br>SF-36<br>Beck Depression Inventory                      |
| Yilmaz et al., 2020 <sup>381</sup>         | P | Pr | Post op - inguinal herniorrhaphy                            | 52 (3W)    | TENS (HF) + intramuscular NSAID = 26           | Placebo TENS (0mA) + intramuscular NSAID = 26                                                         | Fixed<br>5 x 30 mins / day x 1 day<br>5 sessions               | Pain intensity (VAS)                                              | Analgesic consumption,<br>Newcastle Satisfaction with Nursing Care Scale<br>Vital signs             |
| Yilmazer et al., 2012 <sup>382</sup>       | P | Pr | Procedural pain - office endometrial biopsy                 | 65 (65W)   | TENS (NR) + Oral naproxen = 33                 | Placebo TENS + oral naproxen (0mA) = 32                                                               | Fixed<br>10 mins pre and during procedure<br>1 session         | Pain intensity (VAS)                                              | Blood pressure and pulse<br>Vasovagal symptoms questionnaire                                        |
| Yokoyama et al., 2004 <sup>383</sup>       | P | Pr | Back pain - chronic low non-specific                        | 53 (30W)   | TENS (HF) + analgesics = 18                    | Percutaneous electrical nerve stimulation + analgesics = 18<br>PENS + TENS + analgesics = 17          | Fixed<br>1 x 20 mins / day x 2 / week x 8 weeks<br>16 sessions | Pain intensity (VAS)                                              | Analgesic consumption<br>Degree of impairment (5 categories)                                        |
| Yoshimizu et al., 2012 <sup>384</sup>      | C | E  | Neck pain - chronic non-specific ('Shoulder and neck pain') | 90 (52W)   | TENS (LF) = 90                                 | Electroacupuncture = 90                                                                               | Fixed<br>1 x 15 mins<br>1 session                              | Pain intensity (VAS)                                              | SF-36                                                                                               |
| Yüksel et al., 2019 <sup>385</sup>         | P | E  | Fibromyalgia                                                | 42 (NR)    | TENS (HF) = 21                                 | Acupuncture = 21                                                                                      | Fixed<br>1 x 20 mins<br>1 session                              | Pain intensity (VAS)                                              | Pressure algometry pain threshold<br>Beck Depression Inventory<br>Fibromyalgia Impact Questionnaire |
| Yurtkuran and Kocagil, 1999 <sup>386</sup> | P | Pr | Osteoarthritis - knee                                       | 100 (91W)  | TENS (LF) = 25                                 | Electroacupuncture = 25<br>Ice massage = 25<br>Placebo TENS (no current) = 25                         | Fixed<br>1 x 20 mins / day x 5 / week x 2 weeks<br>10 sessions | Pain intensity (5 categories)<br>• Present pain<br>• Overall pain | 50-foot walking time<br>Quadriceps muscle strength<br>Range of motion                               |
| Zakariaee et al., 2019 <sup>387</sup>      | P | Pr | Post op - episiotomy                                        | 120 (120W) | TENS (HF) + routine care = 40                  | Placebo TENS (0mA) + routine care = 40<br>Routine care = 40                                           | Fixed<br>1 x 60 mins<br>1 session                              | Pain intensity (NRS)                                              | TENS' complications satisfaction rate                                                               |
| Zhang et al., 2020 <sup>388</sup>          | P | E  | Chronic TMJ pain (TMJ disc displacement without reduction)  | 20 (10W)   | TENS (LF, AL-TENS) = 10                        | Placebo TENS (0mA) = 10                                                                               | Fixed<br>1 x 45 mins<br>1 session                              | Pain intensity (NRS)<br>• Movement – jaw opening and closing      | Mandibular motor function using Cranio-Mandibular Evaluation System                                 |
| Zhou et al., 2018 <sup>389</sup>           | P | Pr | Hemiplegic shoulder pain                                    | 90 (19W)   | TENS (HF) + rehab programme = 32               | NMES + rehabilitation programme = 31<br>Conventional rehab programme (SoC, no TENS control) = 18      | Fixed<br>1 x 60 mins / day x 5 days x 4 weeks<br>20 sessions   | Pain intensity (NRS)                                              | Fugl-Meyer<br>Modified Ashworth scale<br>Barthel Index<br>Stroke specific quality of life scale     |

## 08\_OL-TABLE1\_IncludedStudies

- 1
- 2 • Design: P = Parallel group; C = Crossover.
- 3 • Type: E = Predominantly Explanatory; Pr = Predominantly Pragmatic (mixed).
- 4 • Sample: W = women
- 5 • Primary TENS intervention group as selected by reviewers: Size of sample arm '=' on enrolment; HF = high frequency >10 pps); LF = low frequency < 10pps or LF burst pattern. AF = alternating frequency, MF = modulated frequency;
- 6 VF = various frequencies; burst = burst pattern of pulse delivery; HI = High Intensity TENS
- 7 • Comparison Intervention(s). Listed in reviewers' order of priority; number in trial arm '='; Placebo TENS (0mA – sham device or dead batteries); Fading = TENS current administered briefly and then turned off e.g. applied for 30 seconds
- 8 and then drifted off to 0mA over a 15 second time frame; Active = Placebo TENS used currents above 0mA, >SDT- infrequent pulses = current above sensory detection threshold and time between pulses modified so that they were
- 9 delivered very infrequently (e.g. inter-pulse interval adjusted from 330 ms to 33 s to avoid any analgesic effect), >SDT- TENS remote = current above sensory detection threshold and delivered at a site considered to be completely
- 10 unrelated to the site of the pain; categorised as considered as standard of care (SoC)
- 11 • TENS regimen: Fixed = regimen either delivered as such or advice given to patient on regimen to use themselves; PRN = 'pro re nata', when necessary; Extracted elements of regimen as min. each session / no. sessions / day / session days
- 12 / week / weeks / course of treatment (no. of TENS sessions));
- 13 • Primary outcome measures in relation to this review: Pain intensity as dichotomous or continuous data
- 14 • Secondary outcomes: Analgesic consumption – general term to encompass any time of measurement associated with analgesic medication
- 15 • Other Abbreviations: IFT=Interferential current therapy; NSAID = Non-Steroidal Anti-Inflammatory Drugs; PENS = Percutaneous electrical nerve stimulation, TONS = transcutaneous occipital nerve stimulation EA = electroacupuncture;
- 16 VAS = visual analogue scale; NRS = Numerical rating scale; PCA = Patient controlled analgesia; BPI = Brief Pain Inventory LANSS = Leeds Assessment of Neuropathic Symptoms and Signs; WOMAC = Western Ontario and McMaster
- 17 Universities Osteoarthritis Index; NR = Not reported

**REFERENCES – INCLUDED STUDIES\***

\*Note: Reference numbering in this list relates only to studies cited in this table

- 19 1. Abbasi AA, Shehzad M, Hussain A. Transcutaneous electrical nerve encouragement by way of the adjunct to non-steroidal unwilling-inflammatory medicines for aching management
- 20 throughout pleurodesis. *Indo American Journal of Pharmaceutical Sciences* 2019; 6(6): 12943-7.
- 21 2. Abelson K, Langely GB, Sheppard H. Transcutaneous electrical nerve stimulation in rheumatoid arthritis. *New Zealand Medical Journal* 1983; 96(727): 156-8.
- 22 3. Abreu EA, Santos JDMd, Ventura PLJRD. Efetividade da eletroestimulação nervosa transcutânea no alívio da dor durante o trabalho de parto: um ensaio clínico controlado. 2010;
- 23 11(4): 313-8.
- 24 4. Acedo AA, Luduvic Antunes AC, Barros dos Santos A, et al. Upper trapezius relaxation induced by TENS and interferential current in computer users with chronic nonspecific neck
- 25 discomfort: An electromyographic analysis. *Journal of Back and Musculoskeletal Rehabilitation* 2015; 28(1): 19-24.
- 26 5. Adedoyin RA, Olaogun MOB, Oyeyemi AL. Transcutaneous electrical nerve stimulation and interferential current combined with exercise for the treatment of knee osteoarthritis: a
- 27 randomised controlled trial. *Hong Kong Physiotherapy Journal* 2005; 23: 13-9.
- 28 6. Ahmed MT. Effect of transcutaneous electrical nerve stimulation on postoperative pain after inguinal hernia repair: A randomized placebo-controlled trial. [Turkish]. *Turkiye Fiziksel*
- 29 *Tip ve Rehabilitasyon Dergisi* 2010; 56(4): 170-6.
- 30 7. Ahmed GM, Maher EA, Elnassag BAEMR, Sayed HM, Kabbash SI. Effects of repetitive transcranial magnetic stimulation versus transcutaneous electrical nerve stimulation to
- 31 decrease diabetic neuropathic pain. *International Journal of Therapy and Rehabilitation* 2020; 27(2).
- 32 8. Alcidi L, Beneforti E, Maresca M, Santosuosso U, Zoppi M. Low power radiofrequency electromagnetic radiation for the treatment of pain due to osteoarthritis of the knee. *Reumatismo* 2007; 59(2): 140-5.
- 33 9. Ali J, Yaffe CS, Serrette C. The effect of transcutaneous electric nerve stimulation on postoperative pain and pulmonary function. *Surgery* 1981; 89(4): 507-12.
- 34 10. Alizade MH, Ahmadzad S. A comparison of exercise therapy and transcutaneous electrical nerve stimulation for the treatment of chronic low back pain. *World J Sport Sci* 2009;
- 35 2(1): 43-7.
- 36 11. Allais G, De Lorenzo C, Quirico PE, et al. Non-pharmacological approaches to chronic headaches: Transcutaneous electrical nerve stimulation, lasertherapy and acupuncture in
- 37 transformed migraine treatment. *Neurological Sciences* 2003; 24(SUPPL. 2): S138-S42.
- 38 12. Alm WA, Gold ML, Weil LS. Evaluation of transcutaneous electrical nerve stimulation (TENS) in podiatric surgery. *Journal of the American Podiatry Association* 1979; 69(9): 537-
- 39 42.
- 40 13. Al-Smadi J, Warke K, Wilson I, et al. A pilot investigation of the hypoalgesic effects of transcutaneous electrical nerve stimulation upon low back pain in people with multiple
- 41 sclerosis. *Clinical Rehabilitation* 2003; 17(7): 742-9.

## 08\_OL-TABLE1\_IncludedStudies

14. Altay F, Durmus D, Cantürk F. Effects of TENS on pain, disability, quality of life and depression in patients with knee osteoarthritis. *Turkish Journal of Rheumatology* 2010; 25(3): 116-21.
15. Alvarez-Arenal A, Junquera LM, Fernandez JP, Gonzalez I, Olay S. Effect of occlusal splint and transcutaneous electric nerve stimulation on the signs and symptoms of temporomandibular disorders in patients with bruxism. *Journal of Oral Rehabilitation* 2002; 29(9): 858-63.
16. Alves Silverio KC, Brasolotto AG, Thais Donalson Siqueira L, Carneiro CG, Fukushiro AP, Roberto de Jesus Guirro R. Effect of application of transcutaneous electrical nerve stimulation and laryngeal manual therapy in dysphonic women: clinical trial. *Journal of Voice* 2015; 29(2): 200-8.
17. Amer-Cuenca JJ, Goicoechea C, Girona-Lopez A, et al. Pain relief by applying transcutaneous electrical nerve stimulation (TENS) during unsedated colonoscopy: a randomized double-blind placebo-controlled trial. *European Journal of Pain* 2011; 15(1): 29-35.
18. AminiSaman J, Karimpour H, Hemmatpour B, Mohammadi S, Darvishi S, Kawyannejad R. Effect of TENS on the Pain Intensity during Insertion of Needle in Patients Undergoing Spinal anesthesia: A Randomized Controlled Study. *Journal of Acupuncture and Meridian Studies* 2020.
19. Angulo DL, Colwell Jr CW. Use of postoperative TENS and continuous passive motion following total knee replacement. *Journal of Orthopaedic and Sports Physical Therapy* 1990; 11(12): 599-604.
20. Ardic F, Sarhus M, Topuz O. Comparison of two different techniques of electrotherapy on myofascial pain. *Journal of Back and Musculoskeletal Rehabilitation* 2002; 16(1): 11-6.
21. Arvidsson I, Eriksson E. Postoperative TENS pain relief after knee surgery: objective evaluation. *Orthopedics* 1986; 9(10): 1346-51.
22. Asgari Z, Tavoli Z, Hosseini R, et al. A comparative Study between Transcutaneous Electrical Nerve Stimulation and Fentanyl to Relieve Shoulder Pain during Laparoscopic Gynecologic Surgery under Spinal Anesthesia: A Randomized Clinical Trial. *Pain Research and Management* 2018; 2018: 9715142.
23. Atamaz FC, Durmaz B, Baydar M, et al. Comparison of the efficacy of transcutaneous electrical nerve stimulation, interferential currents, and shortwave diathermy in knee osteoarthritis: a double-blind, randomized, controlled, multicenter study. *Archives of Physical Medicine and Rehabilitation* 2012; 93(5): 748-56.
24. Aydin G, Tomruk S, Keles I, Demir SO, Orkun S. Transcutaneous electrical nerve stimulation versus baclofen in spasticity: Clinical and electrophysiologic comparison. *American Journal of Physical Medicine and Rehabilitation* 2005; 84(8): 584-92.
25. Azatcam G, Atalay NS, Akkaya N, et al. Comparison of effectiveness of Transcutaneous Electrical Nerve Stimulation and Kinesio Taping added to exercises in patients with myofascial pain syndrome. *Journal of Back and Musculoskeletal Rehabilitation* 2017; 30(2): 291-8.
26. Báez-Suárez A, Martín-Castillo E, García-Andújar J, García-Hernández J, Quintana-Montesdeoca MP, Loro-Ferrer JF. Evaluation of different doses of transcutaneous nerve stimulation for pain relief during labour: a randomized controlled trial. *Trials* 2018; 19(1): 652.
27. Bai HY, Bai HY, Yang ZQ. Effect of transcutaneous electrical nerve stimulation therapy for the treatment of primary dysmenorrhea. *Medicine* 2017; 96(36): e7959.
28. Baki ED, Oz G, Kokulu S, et al. Comparison of Transcutaneous Electrical Nerve Stimulation and Paravertebral Block for Postthoracotomy Pain Relief. *The Thoracic and Cardiovascular Surgeon* 2015; 63(6): 514-8.
29. Ballegaard S, Christophersen S, Dawids S, Hesse J, Olsen N. Acupuncture and transcutaneous electric nerve stimulation in the treatment of pain associated with chronic pancreatitis. A randomized study. *Scand J Gastroenterol* 1985; 20(10): 1249-54.
30. Barbarisi M, Pace MC, Passavanti MB, et al. Pregabalin and transcutaneous electrical nerve stimulation for postherpetic neuralgia treatment. *The Clinical Journal of Pain* 2010; 26(7): 567-72.
31. Barker R, Lang T, Steinlechner B, et al. Transcutaneous electrical nerve stimulation as prehospital emergency interventional care: Treating acute pelvic pain in young women. *Neuromodulation* 2006; 9(2): 136-42.
32. Barker KL, Elliott CJ, Sackley CM, Fairbank JC. Treatment of chronic back pain by sensory discrimination training. A Phase I RCT of a novel device (FairMed) vs. TENS. *BMC Musculoskeletal Disorders* 2008; 9: 97.
33. Başkurt Z, Başkurt F, Özcan A, Yılmaz Ö. The immediate effects of heat and TENS on pressure pain threshold and pain intensity in patients with Stage I shoulder impingement syndrome. *The Pain Clinic* 2006; 18(1): 81-5.
34. Bayindir O, Paker T, Akpınar B, Erenturk S, Askin D, Aytac A. Use of transcutaneous electrical nerve stimulation in the control of postoperative chest pain after cardiac surgery. *Journal of Cardiothoracic and Vascular Anesthesia* 1991; 5(6): 589-91.
35. Beckwée D, Bautmans I, Lefeber N, Lievens P, Scheerlinck T, Vaes P. Effect of Transcutaneous Electric Nerve Stimulation on Pain after Total Knee Arthroplasty: a Blind Randomized Controlled Trial. *Journal of Knee Surgery* 2018; 31(2): 189-96.

08\_OL-TABLE1\_IncludedStudies

36. Benedetti F, Amanzio M, Casadio C, et al. Control of postoperative pain by transcutaneous electrical nerve stimulation after thoracic operations. *The Annals of Thoracic Surgery* 1997; 63(3): 773-6.
37. Bennett MI, Johnson MI, Brown SR, Radford H, Brown JM, Searle RD. Feasibility study of Transcutaneous Electrical Nerve Stimulation (TENS) for cancer bone pain. *The Journal of Pain* 2010; 11(4): 351-9.
38. Bergeron-Vezina K, Filion C, Couture C, Vallee E, Laroche S, Leonard G. Adjusting Pulse Amplitude During Transcutaneous Electrical Nerve Stimulation Does Not Provide Greater Hypoalgesia. *Journal of Alternative and Complementary Medicine* 2018; 24(3): 262-7.
39. Bertalanffy A, Kober A, Bertalanffy P, et al. Transcutaneous electrical nerve stimulation reduces acute low back pain during emergency transport. *Academic Emergency Medicine* 2005; 12(7): 607-11.
40. Bi X, Lv H, Chen BL, Li X, Wang XQ. Effects of transcutaneous electrical nerve stimulation on pain in patients with spinal cord injury: a randomized controlled trial. *Journal of Physical Therapy Science* 2015; 27(1): 23-5.
41. Bilgili A, Cakir T, Dogan SK, Ercalik T, Filiz MB, Toraman F. The effectiveness of transcutaneous electrical nerve stimulation in the management of patients with complex regional pain syndrome: A randomized, double-blinded, placebo-controlled prospective study. *Journal of Back and Musculoskeletal Rehabilitation* 2016; 29(4): 661-71.
42. Binder P, Gustafsson A, Uvnas-Moberg K, Nissen E. Hi-TENS combined with PCA-morphine as post caesarean pain relief. *Midwifery* 2011; 27(4): 547-52.
43. Bjersa K, Andersson T. High frequency TENS as a complement for pain relief in postoperative transition from epidural to general analgesia after pancreatic resection. *Complementary Therapies in Clinical Practice* 2014; 20(1): 5-10.
44. Bjersa K, Jildenstaal P, Jakobsson J, Egardt M, Fagevik Olsen M. Adjunct High Frequency Transcutaneous Electric Stimulation (TENS) for Postoperative Pain Management during Weaning from Epidural Analgesia Following Colon Surgery: Results from a Controlled Pilot Study. *Pain Management Nursing* 2015; 16(6): 944-50.
45. Bloodworth DM, Nguyen BN, Garver W, et al. Comparison of stochastic vs. conventional transcutaneous electrical stimulation for pain modulation in patients with electromyographically documented radiculopathy. *American Journal of Physical Medicine and Rehabilitation* 2004; 83(8): 584-91.
46. Bolat MS, Cinar O, Asci R, BuyukalPELLI R. A novel method for pain control: infiltration free local anesthesia technique (INFLATE) for transrectal prostatic biopsy using transcutaneous electrical nerve stimulation (TENS). *International Urology and Nephrology* 2019; 51(12): 2119-26.
47. Bono F, Salvino D, Mazza MR, et al. The influence of ictal cutaneous allodynia on the response to occipital transcutaneous electrical stimulation in chronic migraine and chronic tension-type headache: a randomized, sham-controlled study. *Cephalalgia* 2015; 35(5): 389-98.
48. Borjesson M, Eriksson P, Dellborg M, Eliasson T, Mannheimer C. Transcutaneous electrical nerve stimulation in unstable angina pectoris. *Coronary Artery Disease* 1997; 8(8-9): 543-50.
49. Borjesson M, Pilhall M, Eliasson T, Norssell H, Mannheimer C, Rolny P. Esophageal visceral pain sensitivity: Effects of TENS and correlation with manometric findings. *Digestive Diseases and Sciences* 1998; 43(8): 1621-8.
50. Borup L, Wurlitzer W, Hedegaard M, Kesmodel US, Hvidman L. Acupuncture as pain relief during delivery: a randomized controlled trial. *Birth* 2009; 36(1): 5-12.
51. Breit R, Van der Wall H. Transcutaneous electrical nerve stimulation for postoperative pain relief after total knee arthroplasty. *The Journal of Arthroplasty* 2004; 19(1): 45-8.
52. Buchmuller A, Navez M, Millette-Bernardin M, et al. Value of TENS for relief of chronic low back pain with or without radicular pain. *European Journal of Pain* 2012; 16(5): 656-65.
53. Bulut M, Özcan A, Çakan T, Mektas M, Çulha C. The Comparison of Effectiveness of TENS and Placebo TENS in Peripheral Neuropathic Pain in Patients with Type II Diabetes Mellitus. *Turkiye Klinikleri Journal of Medical Sciences* 2011; 31(4): 913-8.
54. Bundsen P, Ericson K, Peterson L, Thiringer K. Pain relief in labor by transcutaneous electrical nerve stimulation. Testing of a modified stimulation technique and evaluation of the neurological and biochemical condition of the newborn infant. *Acta Obstetrica et Gynecologica Scandinavica* 1982; 61(2): 129-36.
55. Can F, Tandogan R, Yilmaz I, Dolunay E, Erden Z. Rehabilitation of patellofemoral pain syndrome: TENS versus diadynamic current therapy for pain relief. *Pain Clinic* 2003; 15(1): 61-8.
56. Casale R, Damiani C, Maestri R, Wells CD. Pain and electrophysiological parameters are improved by combined 830-1064 high-intensity LASER in symptomatic carpal tunnel syndrome versus Transcutaneous Electrical Nerve Stimulation. A randomized controlled study. *European Journal of Physical and Rehabilitation Medicine* 2013; 49(2): 205-11.
57. Çebi AT. Effects of transcutaneous electrical nerve stimulation on pain after impacted third molar surgery. *Medicina Oral Patologia Oral y Cirugia Bucal* 2019; 24(3): e404-e8.
58. Celik EC, Erhan B, Gunduz B, Lakse E. The effect of low-frequency TENS in the treatment of neuropathic pain in patients with spinal cord injury. *Spinal cord* 2013; 51(4): 334-7.
59. Cetin N, Aytar A, Atalay A, Akman M. Comparing hot pack, short-wave diathermy, ultrasound, and TENS on isokinetic strength, pain, and functional status of women with osteoarthritic knees: a single-blind, randomized, controlled trial. *American Journal of Physical Medicine and Rehabilitation* 2008; 87(6): 443-51.

## 08\_OL-TABLE1\_IncludedStudies

60. Chandra A, Banavaliker JN, Das PK, Hasti S. Use of transcutaneous electrical nerve stimulation as an adjunctive to epidural analgesia in the management of acute thoracotomy pain. *Indian J Anaesth* 2010; 54(2): 116-20.
61. Cheing GL, Hui-Chan CW. Transcutaneous electrical nerve stimulation: nonparallel antinociceptive effects on chronic clinical pain and acute experimental pain. *Archives of Physical Medicine and Rehabilitation* 1999; 80(3): 305-12.
62. Cheing GL, Luk ML. Transcutaneous electrical nerve stimulation for neuropathic pain. *Journal of Hand Surgery* 2005; 30(1): 50-5.
63. Cheing GL, Hui-Chan CW, Chan KM. Does four weeks of TENS and/or isometric exercise produce cumulative reduction of osteoarthritic knee pain? *Clinical Rehabilitation* 2002; 16(7): 749-60.
64. Cheing GL, Tsui AY, Lo SK, Hui-Chan CW. Optimal stimulation duration of tens in the management of osteoarthritic knee pain. *Journal of Rehabilitation Medicine* 2003; 35(2): 62-8.
65. Chellappa D, Thirupathy M. Comparative efficacy of low-Level laser and TENS in the symptomatic relief of temporomandibular joint disorders: a randomized clinical trial. *Indian Journal of Dental Research* 2020; 31(1): 42-7.
66. Cherian JJ, Harrison PE, Benjamin SA, Bhawe A, Harwin SF, Mont MA. Do the Effects of Transcutaneous Electrical Nerve Stimulation on Knee Osteoarthritis Pain and Function Last? *The Journal of Knee Surgery* 2016; 29(6): 497-501.
67. Cherian JJ, Kapadia BH, Bhawe A, et al. Use of Transcutaneous Electrical Nerve Stimulation Device in Early Osteoarthritis of the Knee. *The Journal of Knee Surgery* 2015; 28(4): 321-7.
68. Cherian JJ, Kapadia BH, McElroy MJ, et al. Knee Osteoarthritis: Does Transcutaneous Electrical Nerve Stimulation Work? *Orthopedics* 2016; 39(1): e180-6.
69. Chesterton LS, Lewis AM, Sim J, et al. Transcutaneous electrical nerve stimulation as adjunct to primary care management for tennis elbow: pragmatic randomised controlled trial (TATE trial). *BMJ* 2013; 347: f5160.
70. Lewis M, Chesterton LS, Sim J, Mallen CD, Hay EM, van der Windt DA. An Economic Evaluation of TENS in Addition to Usual Primary Care Management for the Treatment of Tennis Elbow: Results from the TATE Randomized Controlled Trial. *PloS one* 2015; 10(8): e0135460.
71. Chia Y, Arulkumaran S, Chua S, Ratnam S. Effectiveness of transcutaneous electric nerve stimulator for pain relief in labour. *Asia Oceania J Obstet Gynaecol* 1990; 16(2): 145-51.
72. Chiou YF, Yeh ML, Wang YJ. Transcutaneous Electrical Nerve Stimulation on Acupuncture Points Improves Myofascial Pain, Moods, and Sleep Quality. *Rehabilitation Nursing* 2020; 45(4): 225-33.
73. Chitsaz A, Janghorbani M, Shaygannejad V, Ashtari F, Heshmatipour M, Freeman J. Sensory complaints of the upper extremities in multiple sclerosis: relative efficacy of nortriptyline and transcutaneous electrical nerve stimulation. *The Clinical Journal of Pain* 2009; 25(4): 281-5.
74. Chiu TT, Hui-Chan CW, Chein G. A randomized clinical trial of TENS and exercise for patients with chronic neck pain. *Clinical Rehabilitation* 2005; 19(8): 850-60.
75. Cipriano G, Jr., de Camargo Carvalho AC, Bernardelli GF, Tayar Peres PA. Short-term transcutaneous electrical nerve stimulation after cardiac surgery: effect on pain, pulmonary function and electrical muscle activity. *Interactive Cardiovascular and Thoracic Surgery* 2008; 7(4): 539-43.
76. Cipriano G, Jr., Neder JA, Umpierre D, et al. Sympathetic ganglion transcutaneous electrical nerve stimulation after coronary artery bypass graft surgery improves femoral blood flow and exercise tolerance. *Journal of Applied Physiology* 2014; 117(6): 633-8.
77. Coelho de Amorim JS, Braz Rossetti Mr, Mendes Braga NIH. Effects of manual therapy and electrotherapy on knee osteoarthritis. *ConScientiae Saude* 2014; 13(1): 11-20.
78. Cooperman AM, Hall B, Mikalacki K, Hardy R, Sardar E. Use of transcutaneous electrical stimulation in the control of postoperative pain. *American Journal of Surgery* 1977; 133(2): 185-7.
79. Coyne PJ, MacMurren M, Izzo T, Kramer T. Transcutaneous electrical nerve stimulator for procedural pain associated with intravenous needlesticks. *Journal of Intravenous Nursing* 1995; 18(5): 263-7.
80. Crompton AC, Johnson N, Dudek U, Batra N, Tucker A. Is transcutaneous electrical nerve stimulation of any value during cervical laser treatment? *British Journal of Obstetrics and Gynaecology* 1992; 99(6): 492-4.
81. Cuschieri RJ, Morran CG, McArdle CS. Transcutaneous electrical stimulation for postoperative pain. *Annals of the Royal College of Surgeons of England* 1985; 67(2): 127-9.
82. Cuschieri RJ, Morran CG, Pollock JG. Transcutaneous electrical stimulation for ischaemic pain at rest. *British Medical Journal* 1987; 295(6593): 306.
83. da Silva TFG, Suda EY, Marçulo CA, Paes FHS, Pinheiro GT. Comparison of transcutaneous electrical nerve stimulation and hydrotherapy effects on pain, flexibility and quality of life in patients with fibromyalgia. *Fisioterapia e Pesquisa* 2008; 15(2): 118-24 p.



08\_OL-TABLE1\_IncludedStudies

- 1 84. da Silva MP, Liebano RE, Rodrigues VA, Abla LE, Ferreira LM. Transcutaneous electrical nerve stimulation for pain relief after liposuction: a randomized controlled trial. *Aesthetic plastic surgery* 2015; 39(2): 262-9.
- 2 85. Dailey DL, Rakel BA, Vance CG, et al. Transcutaneous electrical nerve stimulation reduces pain, fatigue and hyperalgesia while restoring central inhibition in primary fibromyalgia. *Pain* 2013; 154(11): 2554-62.
- 3 86. Dailey DL, Vance CGT, Rakel BA, et al. Transcutaneous Electrical Nerve Stimulation Reduces Movement-Evoked Pain and Fatigue: A Randomized, Controlled Trial. *Arthritis & Rheumatology* 2020; 72(5): 824-36.
- 4 87. Davies JR. Ineffective transcutaneous nerve stimulation following epidural anaesthesia. *Anaesthesia* 1982 Apr;37(4):453-457 1982.
- 5 88. Dawood MY, Ramos J. Transcutaneous electrical nerve stimulation (TENS) for the treatment of primary dysmenorrhea: a randomized crossover comparison with placebo TENS and ibuprofen. *Obstetrics and gynecology* 1990; 75(4): 656-60.
- 6 89. De Angelis C, Perrone G, Santoro G, Nofroni I, Zichella L. Suppression of pelvic pain during hysteroscopy with a transcutaneous electrical nerve stimulation device. *Fertility and sterility* 2003; 79(6): 1422-7.
- 7 90. De Giorgi I, Castroflorio T, Sartoris B, Deregisbus A. The use of conventional transcutaneous electrical nerve stimulation in chronic facial myalgia patients. *Clinical oral investigations* 2017; 21(1): 275-80.
- 8 91. de Oliveira RGCQ, Silva, J.C., de Almeida, J.F., de Araajo, R.C., Pitangui, A.C.R. High and low frequency TENS for primary dysmenorrhea: preliminary study. *ConScientiae Saude* 2012; 11(1): 149-58.
- 9 92. de Orange FA, Amorim MMRd, Lima L. Uso da eletroestimulação transcutânea para alívio da dor durante o trabalho de parto em uma maternidade-escola: ensaio clínico controlado %J *Revista Brasileira de Ginecologia e Obstetrícia*. 2003; 25: 45-52.
- 10 93. de Sousa L, Gomes-Sponholz FA, Nakano AM. Transcutaneous electrical nerve stimulation for the relief of post-partum uterine contraction pain during breast-feeding: a randomized clinical trial. *The journal of obstetrics and gynaecology research* 2014; 40(5): 1317-23.
- 11 94. DeSantana JM, Santana-Filho VJ, Guerra DR, Sluka KA, Gurgel RQ, da Silva Jr WM. Hypoalgesic Effect of the Transcutaneous Electrical Nerve Stimulation Following Inguinal Herniorrhaphy: A Randomized, Controlled Trial. *Journal of Pain* 2008; 9(7): 623-9.
- 12 95. DeSantana J, Sluka K, Rocha LG. High and low frequency TENS reduce postoperative pain intensity after laparoscopic tubal ligation: A randomized controlled trial. *Clinical Journal of Pain* 2009; 25(2): 12-28.
- 13 96. Dewan A, Sharma R. Effectiveness of transcutaneous electrical nerve stimulation and interferential electrotherapy in adhesive capsulitis. *Pb Journal of Orthopaedics* 2011; 21(1): 64.
- 14 97. Deyo RA, Walsh NE, Martin DC, Schoenfeld LS, Ramamurthy S. A controlled trial of transcutaneous electrical nerve stimulation (TENS) and exercise for chronic low back pain. *The New England journal of medicine* 1990; 322(23): 1627-34.
- 15 98. Dibenedetto P, Iona LG, Zidarich V. CLINICAL-EVALUATION OF S-ADENOSYL-L-METHIONINE VERSUS TRANSCUTANEOUS ELECTRICAL NERVE-STIMULATION IN PRIMARY FIBROMYALGIA. *Current Therapeutic Research-Clinical and Experimental* 1993; 53(2): 222-9.
- 16 99. Dilekci E, Alpayci M, Bayram KB, et al. The efficacy of TENS in patients with lateral epicondylitis: A randomized controlled study. [Turkish]. *Turkiye Fiziksel Tip ve Rehabilitasyon Dergisi* 2016; 62(4): 297-302.
- 17 100. Dissanayaka TD, Pallegama RW, Suraweera HJ, Johnson MI, Kariyawasam AP. Comparison of the Effectiveness of Transcutaneous Electrical Nerve Stimulation and Interferential Therapy on the Upper Trapezius in Myofascial Pain Syndrome: A Randomized Controlled Study. *American journal of physical medicine & rehabilitation* 2016; 95(9): 663-72.
- 18 101. Dogu B, Yilmaz F, Karan A, Ergoz E, Kuran B. Comparative the effectiveness of occlusal splint and TENS treatments on clinical findings and pain threshold of temporomandibular disorders secondary to bruxism. [Turkish]. *Turkiye Fiziksel Tip ve Rehabilitasyon Dergisi* 2008; 54(4): 1-7.
- 19 102. Domaille M, Reeves B. TENS and pain control after coronary artery bypass surgery. *Physiotherapy* 1997; 83(10): 510-6.
- 20 103. Ebadi S, Ansari N, Ahadi T, Fallah E, Forogh B. No immediate analgesic effect of diadynamic current in patients with nonspecific low back pain in comparison to TENS. *Journal of Bodywork and Movement Therapies* 2018; 22(3): 693-9.
- 21 104. Ekblom A, Hansson P. Thermal sensitivity is not changed by acute pain or afferent stimulation. *Journal of neurology, neurosurgery, and psychiatry* 1987; 50(9): 1216-20.
- 22 105. Ekim A, Armagan O, Oner C. [Efficiency of TENS treatment in hemiplegic shoulder pain: a placebo controlled study]. *Agri : Agri (Algoloji) Dernegi'nin Yayin organidir = The journal of the Turkish Society of Algology* 2008; 20(1): 41-6.
- 23 106. Elboim-Gabyzon M, Andrawus Najjar S, Shtarker H. Effects of transcutaneous electrical nerve stimulation (TENS) on acute postoperative pain intensity and mobility after hip fracture: a double-blinded, randomized trial. *Clinical interventions in aging* 2019; 14: 1841-50.



## 08\_OL-TABLE1\_IncludedStudies

107. Elserty N, Kattabei O, Elhafez H. Effect of Fixed Versus Adjusted Transcutaneous Electrical Nerve Stimulation Amplitude on Chronic Mechanical Low Back Pain. *Journal of alternative and complementary medicine (New York, NY)* 2016; 22(7): 557-62.
108. Emmiler M, Solak O, Kocogullari C, et al. Control of acute postoperative pain by transcutaneous electrical nerve stimulation after open cardiac operations: a randomized placebo-controlled prospective study. *The heart surgery forum* 2008; 11(5): E300-3.
109. Engen DJ, Carns PE, Allen MS, et al. Evaluating efficacy and feasibility of transcutaneous electrical nerve stimulation for postoperative pain after video-assisted thoracoscopic surgery: A randomized pilot trial. *Complementary therapies in clinical practice* 2016; 23: 141-8.
110. Erden S, Senol Celik S. The effect of transcutaneous electrical nerve stimulation on post-thoracotomy pain. *Contemporary nurse* 2015; 51(2-3): 163-70.
111. Erdogan M, Erdogan A, Erbil N, Karakaya H, Demircan A. Prospective, randomized, placebo-controlled study of the effect of TENS on postthoracotomy pain and pulmonary function. *World journal of surgery* 2005; 29(12): 1563-70.
112. Erkkola R, Pikkola P, Kanto J. Transcutaneous nerve stimulation for pain relief during labour: a controlled study. *Annales chirurgiae ET gynaecologiae* 1980; 69(6): 273-7.
113. Escortell-Mayor E, Riesgo-Fuertes R, Garrido-Elustondo S, et al. Primary care randomized clinical trial: manual therapy effectiveness in comparison with TENS in patients with neck pain. *Manual therapy* 2011; 16(1): 66-73.
114. Escortell Mayor E, Lebrijo Perez G, Perez Martin Y, Asunsolo del Barco A, Riesgo Fuertes R, Saa Requejo C. [Randomized clinical trial for primary care patients with neck pain: manual therapy versus electrical stimulation]. *Atencion primaria* 2008; 40(7): 337-43.
115. Esteban Gonzalez P, Novoa NM, Varela G. Transcutaneous Electrical Nerve Stimulation Reduces Post-Thoractomy Ipsilateral Shoulder Pain. A Prospective Randomized Study. *Archivos de bronconeumologia* 2015; 51(12): 621-6.
116. Eyigor S, Karapolat H, Ibisoglu U, Durmaz B. Does transcutaneous electrical nerve stimulation or therapeutic ultrasound increase the effectiveness of exercise for knee osteoarthritis: A randomized controlled study. [Turkish]. *Agri : Agri (Algoloji) Dernegi'nin Yayin organidir = The journal of the Turkish Society of Algology* 2008; 20(1): 32-40.
117. Eyigor C, Eyigor S, Kivilcim Korkmaz O. Are intra-articular corticosteroid injections better than conventional TENS in treatment of rotator cuff tendinitis in the short run? A randomized study. *European journal of physical and rehabilitation medicine* 2010; 46(3): 315-24.
118. Facci LM, Nowotny JP, Tormem F, Trevisani VF. Effects of transcutaneous electrical nerve stimulation (TENS) and interferential currents (IFC) in patients with nonspecific chronic low back pain: randomized clinical trial. *Sao Paulo medical journal = Revista paulista de medicina* 2011; 129(4): 206-16.
119. Farahani DM, Tavallaie SA, Ahmadi K, Ashtiani AF. Comparison of Neurofeedback and Transcutaneous Electrical Nerve Stimulation Efficacy on Treatment of Primary Headaches: A Randomized Controlled Clinical Trial. *Iranian Red Crescent Medical Journal* 2014; 16(8).
120. Farina S, Casarotto M, Benelle M, et al. A randomized controlled study on the effect of two different treatments (FREMS AND TENS) in myofascial pain syndrome. *Europa medicophysica* 2004; 40(4): 293-301.
121. Fatima N, Sarfraz N. Comparison of High Versus Low Transcutaneous Electrical Nerve Stimulation for Pain Management After Caesarean Section: A Clinical Trial. *Annals of King Edward Medical University Lahore Pakistan* 2019; 25(2).
122. Ferraz FS, Moreira CMC. Eletroanalgesia com utilizacao da TENS no pos-operatorio de cirurgia cardiaca (Electroanalgesia with TENS in postoperative of cardiac surgery) [Portuguese]. *Fisioterapia em Movimento [Physical Therapy in Movement]* 2009 Jan-Mar;22(1):133-139 2009.
123. Ferreira FC, Issy AM, Sakata RK. Assessing the effects of transcutaneous electrical nerve stimulation (TENS) in post-thoracotomy analgesia. *Revista brasileira de anestesiologia* 2011; 61(5): 561-7, 308-10.
124. Ferreira AP, Costa DR, Oliveira AI, et al. Short-term transcutaneous electrical nerve stimulation reduces pain and improves the masticatory muscle activity in temporomandibular disorder patients: a randomized controlled trial. *Journal of applied oral science : revista FOB* 2017; 25(2): 112-20.
125. Finsen V, Persen L, Lovlien M, et al. Transcutaneous electrical nerve stimulation after major amputation. *The Journal of bone and joint surgery British volume* 1988; 70(1): 109-12.
126. Fiorelli A, Morgillo F, Milione R, et al. Control of post-thoracotomy pain by transcutaneous electrical nerve stimulation: effect on serum cytokine levels, visual analogue scale, pulmonary function and medication. *European journal of cardio-thoracic surgery : official journal of the European Association for Cardio-thoracic Surgery* 2012; 41(4): 861-8; discussion 8.
127. Fodor-Sertl B, Miller K, Hohenfellner B. (Transcutaneous electric nerve block in postoperative pain-therapy) [German]. *Zeitschrift fuer Physikalische Medizin, Balneologie, Medizinische Klimatologie* 1990; 19: 132-7.
128. Forogh B, Aslanpour H, Fallah E, Babaei-Ghazani A, Ebadi S. Adding high-frequency transcutaneous electrical nerve stimulation to the first phase of post anterior cruciate ligament reconstruction rehabilitation does not improve pain and function in young male athletes more than exercise alone: a randomized single-blind clinical trial. *Disability and rehabilitation* 2019; 41(5): 514-22.

08\_OL-TABLE1\_IncludedStudies

129. Forst T, Nguyen M, Forst S, Disselhoff B, Pohlmann T, Pfutzner A. Impact of low frequency transcutaneous electrical nerve stimulation on symptomatic diabetic neuropathy using the new Salutaris (R) device. *Diabetes Nutrition & Metabolism* 2004; 17(3): 163-8.
130. Forster EL, Kramer JF, Lucy SD, Scudds RA, Novick RJ. Effect of TENS on pain, medications, and pulmonary function following coronary artery bypass graft surgery. *Chest* 1994; 106(5): 1343-8.
131. Fujii-Abe K, Umino M, Kawahara H, Terada C, Satomura K, Fukayama H. New method for postoperative pain relief using a combination of noxious and non-noxious stimuli after impacted wisdom tooth extraction. *Journal of oral science* 2019; 61(2): 364-9.
132. Galli TT, Chiavegato LD, Liebano RE. Effects of TENS in living kidney donors submitted to open nephrectomy: a randomized placebo-controlled trial. *European journal of pain (London, England)* 2015; 19(1): 67-76.
133. Galloway DJ, Boyle P, Burns HJ, Davidson PM, George WD. A clinical assessment of electroanalgesia following abdominal operations. *Surgery, gynecology & obstetrics* 1984; 159(5): 453-6.
134. Garcia-Perez S, Garcia-Rios MC, Perez-Marmol JM, et al. Effectiveness of Transcutaneous Electrical Nerve Stimulation Energy in Older Adults: A Pilot Clinical Trial. *Advances in skin & wound care* 2018; 31(10): 462-9.
135. Gerson GR, Jones RB, Luscombe DK. Studies on the concomitant use of carbamazepine and clomipramine for the relief of post-herpetic neuralgia. *Postgraduate medical journal* 1977; 53 Suppl 4: 104-9.
136. Ghoname ESA, Craig WF, White PF, et al. Percutaneous electrical stimulation for low back pain - A randomized crossover study. *Jama-Journal of the American Medical Association* 1999; 281(9): 818-23.
137. Ghoname ESA, White PF, Ahmed HE, Hamza MA, Craig WF, Noe CE. Percutaneous electrical nerve stimulation: an alternative to TENS in the management of sciatica. *Pain* 1999; 83(2): 193-9.
138. Gilbert JM, Gledhill T, Law N, George C. Controlled trial of transcutaneous electrical nerve stimulation (TENS) for postoperative pain relief following inguinal herniorrhaphy. *The British journal of surgery* 1986; 73(9): 749-51.
139. Grabiańska E, Leśniewicz J, Pieszyński I, Kostka J. Comparison of the analgesic effect of interferential current (IFC) and TENS in patients with low back pain. *Wiadomosci lekarskie (Warsaw, Poland)* 2015; 68(1): 13-9.
140. Graff-Radford S, Reeves J, Baker R, Chiu D. Effects of transcutaneous electrical nerve stimulation on myofascial pain and trigger point sensitivity. *Pain* 1989; 37(1): 1-5.
141. Grant DJ, Bishop\_Miller J, Winchester DM, Anderson M, Faulkner S. A randomized comparative trial of acupuncture versus transcutaneous electrical nerve stimulation for chronic back pain in the elderly. *Pain* 1999; 82(1): 9-13.
142. Gregorini C, Cipriano Jr G, De Aquino LM, Rodrigues Branco JN, Bernardelli GF. Short-duration transcutaneous electrical nerve stimulation in the postoperative period of cardiac surgery. [Portuguese, English]. *Arquivos brasileiros de cardiologia* 2010; 94(3): 325-31+45-51.
143. Grimmer K. A controlled double blind study comparing the effects of strong burst mode TENS and High Rate TENS on painful osteoarthritic knees. *Australian Journal of Physiotherapy* 1992; 38: 49-56.
144. Gschiel B, Kager H, Pipam W, Weichart K, Likar R. Analgesic efficacy of TENS therapy in patients with gonarthrosis. A prospective, randomised, placebo-controlled, double-blind study. [German]. *Schmerz (Berlin, Germany)* 2010; 24(5): 494-500.
145. Gunay Ucurum S, Kaya DO, Kayali Y, Askin A, Tekindal MA. Comparison of different electrotherapy methods and exercise therapy in shoulder impingement syndrome: a prospective randomized controlled trial. *Acta orthopaedica et traumatologica turcica* 2018; 52(4): 249-55.
146. Guo XJ, Jia J. Comparison of therapeutic effects on fibromyalgia syndrome between dermal-neurological electric stimulation and electric acupuncture. *Chinese Journal of Clinical Rehabilitation* 2005; 9(46): 171-3.
147. Hamza MA, White PF, Ahmed HE, Ghoname EA. Effect of the frequency of transcutaneous electrical nerve stimulation on the postoperative opioid analgesic requirement and recovery profile. *Anesthesiology* 1999; 91(5): 1232-8.
148. Hanfy HM, El-Bigawy A. Effects of transcutaneous electrical nerve stimulation versus acupressure in the treatment of primary dysmenorrhea. *Bull Fac Phys Ther Cairo Univ* 2004; 9: 2.
149. Hansson P, Eklblom A. Transcutaneous electrical nerve stimulation (TENS) as compared to placebo TENS for the relief of acute oro-facial pain. *Pain* 1983; 15(2): 157-65.
150. Hansson P, Eklblom A, Thomsson M, Fjellner B. Influence of naloxone on relief of acute oro-facial pain by transcutaneous electrical nerve stimulation (TENS) or vibration. *Pain* 1986; 24(3): 323-9.

08\_OL-TABLE1\_IncludedStudies

- 1
- 2 151. Hargreaves A, Lander J. Use of transcutaneous electrical nerve stimulation for postoperative pain. *Nursing research* 1989; 38(3): 159-61.
- 3 152. Harrison RF, Woods T, Shore M, Mathews G, Unwin A. Pain relief in labour using transcutaneous electrical nerve stimulation (TENS). A TENS/TENS placebo controlled study in  
4 two parity groups. *British journal of obstetrics and gynaecology* 1986; 93(7): 739-46.
- 5 153. Hart JM, Kuenze CM, Pietrosimone BG, Ingersoll CD. Quadriceps function in anterior cruciate ligament-deficient knees exercising with transcutaneous electrical nerve stimulation  
6 and cryotherapy: a randomized controlled study. *Clinical rehabilitation* 2012; 26(11): 974-81.
- 7 154. Hazneci B, Tan AK, Ozdem T, Dincer K, Kalyon TA. The effects of transcutaneous electroneurostimulation and ultrasound in the treatment of reflex sympathetic dystrophy  
8 syndrome. [Turkish]. *Turkiye Fiziksel Tip ve Rehabilitasyon Dergisi* 2005; 51(3): 83-9.
- 9 155. Herrera-Lasso I, Mobarak L, Fernández-Dominguez L, Cardiel MH, Alarcón-Segovia D. Comparative Effectiveness of Packages of Treatment Including Ultrasound or  
10 Transcutaneous Electrical Nerve Stimulation in Painful Shoulder Syndrome. *Physiotherapy* 1993; 79(4): 251-3.
- 11 156. Hershman M CW, Swift R, Reilly D, Gompertz H, Wood C. Transcutaneous electrical nerve stimulation as adjunctive analgesia in patients undergoing abdominal procedures. *Surg  
12 Res Commun* 1989; 7: 65-9.
- 13 157. Hokenek NM, Erdogan MO, Hokenek UD, Algin A, Tekyol D, Seyhan AU. Treatment of migraine attacks by transcutaneous electrical nerve stimulation in emergency department: A  
14 randomize controlled trial. *American Journal of Emergency Medicine* 2020.
- 15 158. Hou CR, Tsai LC, Cheng KF, Chung KC, Hong C. Immediate effects of various physical therapeutic modalities on cervical myofascial pain and trigger-point sensitivity. *Archives of  
16 physical medicine and rehabilitation* 2002; 83(10): 1406-14.
- 17 159. Hruby G, Ames C, Chen C, et al. Assessment of efficacy of transcutaneous electrical nerve stimulation for pain management during office-based flexible cystoscopy. *Urology* 2006;  
18 67(5): 914-7.
- 19 160. Hsieh RL, Lee WC. One-shot percutaneous electrical nerve stimulation vs. transcutaneous electrical nerve stimulation for low back pain: comparison of therapeutic effects. *American  
20 journal of physical medicine & rehabilitation* 2002; 81(11): 838-43.
- 21 161. Hsueh TC, Cheng PT, Kuan TS, Hong CZ. The immediate effectiveness of electrical nerve stimulation and electrical muscle stimulation on myofascial trigger points. *American  
22 journal of physical medicine & rehabilitation* 1997; 76(6): 471-6.
- 23 162. Hughes S, Dailey P, Partridge C. Transcutaneous electrical nerve stimulation for labour analgesia. *Anesthesia and analgesia* 1988; 67: S99.
- 24 163. Husch HH, Watte G, Zanon M, et al. Effects of Transcutaneous Electrical Nerve Stimulation on Pain, Pulmonary Function, and Respiratory Muscle Strength After Posterolateral  
25 Thoracotomy: A Randomized Controlled Trial. *Lung* 2020; 198(2): 345-53.
- 26 164. Ilhanli I. Conventional, Acupuncture-Like or Brief-Intense: Is There Any Difference Between TENS Modalities According to Outcomes of Chronic Low Back Pain with Lumbar Disc  
27 Herniation. *Clinical Medicine Research* 2015; 4(5): 143-50.
- 28 165. Inal EE, Eroglu P, Yucel SH, Orhan H. Which is the Appropriate Frequency of TENS in Managing Knee Osteoarthritis: High or Low Frequency? *Journal of Clinical and Analytical  
29 Medicine* 2016; 7(3): 339-44.
- 30 166. Isik M, Ugur M, Yakisan RS, Sari T, Yilmaz N. Comparison of the effectiveness of medicinal leech and TENS therapy in the treatment of primary osteoarthritis of the knee : A  
31 randomized controlled trial. *Zeitschrift fur Rheumatologie* 2017; 76(9): 798-805.
- 32 167. Jaafarpour M, Khani A, Javadifar N, Taghinejad H, Mahmoudi R, Saadipour KH. The analgesic effect of transcutaneous electrical nerve stimulation (TENS) on caesarean under spinal  
33 anaesthesia. *Journal of Clinical and Diagnostic Research* 2008; 2(3): 815-9.
- 34 168. Jamison RN, Wan L, Edwards RR, Mei A, Ross EL. Outcome of a High-Frequency Transcutaneous Electrical Nerve Stimulator (hfTENS) Device for Low Back Pain: A Randomized  
35 Controlled Trial. *Pain Practice* 2019; 19(5): 466-75.
- 36 169. Jarzem P, Harvey E, Arcaro N, Kaczorowski J. Transcutaneous electrical nerve stimulation (TENS) for short-term treatment of low back pain - randomized double blind crossover  
37 study of sham versus conventional TENS. *Journal of Musculoskeletal Pain* 2005; 13(2): 11-7.
- 38 170. Jensen JE, Conn RR, Hazelrigg G, Hewett JE. The use of transcutaneous neural stimulation and isokinetic testing in arthroscopic knee surgery. *American journal of sports medicine*  
39 1985; 13(1): 27-33.
- 40 171. Jensen H, Zesler R, Christensen T. Transcutaneous electrical nerve stimulation (TNS) for painful osteoarthritis of the knee. *International journal of rehabilitation research  
41 Internationale Zeitschrift fur Rehabilitationsforschung Revue internationale de recherches de readaptation* 1991; 14(4): 356-8.
- 42 172. Jones AYM, Hutchinson RC. A comparison of the analgesic effect of transcutaneous electrical nerve stimulation and entonox. *Physiotherapy* 1991; 77(8): 526-30.
- 43
- 44
- 45
- 46

08\_OL-TABLE1\_IncludedStudies

- 1  
2 173. Kara B, Baskurt F, Acar S, et al. The effect of TENS on pain, function, depression, and analgesic consumption in the early postoperative period with spinal surgery patients. *Turkish neurosurgery* 2011; 21(4): 618-24.
- 3  
4 174. Kararmaz A, Kaya S, Karaman H, Turhanoglu S. Effect of the frequency of transcutaneous electrical nerve stimulation on analgesia during extracorporeal shock wave lithotripsy. *Urological research* 2004; 32(6): 411-5.
- 5  
6 175. Kayman-Kose S, Arioz DT, Toktas H, et al. Transcutaneous electrical nerve stimulation (TENS) for pain control after vaginal delivery and cesarean section. *The journal of maternal-fetal & neonatal medicine : the official journal of the European Association of Perinatal Medicine, the Federation of Asia and Oceania Perinatal Societies, the International Society of Perinatal Obstet* 2014; 27(15): 1572-5.
- 7  
8 176. Keskin EA, Onur O, Keskin HL, Gumus, II, Kafali H, Turhan N. Transcutaneous electrical nerve stimulation improves low back pain during pregnancy. *Gynecologic and obstetric investigation* 2012; 74(1): 76-83.
- 9  
10 177. Kibar S, Konak HE, V SA, DoğAnay ErdoğAn B, EvcİK D. The Effectiveness of Combined Transcutaneous Electrical Nerve Stimulation and Interferential Current Therapy on Chronic Low Back Pain: A Randomized, Double-Blind, Sham-Controlled Study. *Journal of Physical Medicine & Rehabilitation Sciences / Fiziksel Tıp ve Rehabilitasyon Bilimleri Dergisi* 2020; 23(1): 32-40.
- 11  
12 178. Kim S, Park K, Son B, Jeon Y. The Effect of Transcutaneous Electrical Nerve Stimulation on Pain During Venous Cannulation. *Current Therapeutic Research* 2012; 73(4/5): 134-9.
- 13  
14 179. Kim D-H, Yoon KB, Yoon DM, et al. Comparison of NSAID Patch Given as Monotherapy and NSAID Patch in Combination with Transcutaneous Electric Nerve Stimulation, a Heating Pad, or Topical Capsaicin in the Treatment of Patients with Myofascial Pain Syndrome of the Upper Trapezius: A Pilot Study. *Pain Medicine* 2014; 15(12): 2128-38.
- 15  
16 180. Kirupa K, Divya Mary SM, Vaishnavi G, Nithya Nisha R, Rennie Mercy J, Jaiganesh G. A comparative study of ultrasound therapy and transcutaneous electrical nerve stimulation in reducing pain for temporomandibular joint disorder. *Drug invention today* 2019; 12(3): 515-7.
- 17  
18 181. Nobel R, Radiünz V, Carraro TEJT, Contexto-Enfermagem. Use of transcutaneous electric nerve stimulation for pain relief in labour: a possible way to care the child-bearer. 2005; 14(2): 229-36.
- 19  
20 182. Koca I, Boyaci A, Tutoglu A, Ucar M, Kocaturk O. Assessment of the effectiveness of interferential current therapy and TENS in the management of carpal tunnel syndrome: a randomized controlled study. *Rheumatology international* 2014; 34(12): 1639-45.
- 21  
22 183. Kofotolis ND, Vlachopoulos SP, Kellis E. Sequentially allocated clinical trial of rhythmic stabilization exercises and TENS in women with chronic low back pain. *Clinical rehabilitation* 2008; 22(2): 99-111.
- 23  
24 184. Koke AJ, Schouten JS, Lamerichs-Geelen MJ, et al. Pain reducing effect of three types of transcutaneous electrical nerve stimulation in patients with chronic pain: a randomized crossover trial. *Pain* 2004; 108(1-2): 36-42.
- 25  
26 185. Korkmaz OK, Capaci K, Eyigor C, Eyigor S. Pulsed radiofrequency versus conventional transcutaneous electrical nerve stimulation in painful shoulder: a prospective, randomized study. *Clinical rehabilitation* 2010; 24(11): 1000-8.
- 27  
28 186. Kumar S, Raje A. Effect of progressive muscular relaxation exercises versus transcutaneous electrical nerve stimulation on tension headache: A comparative study. *Hong Kong Physiotherapy Journal* 2014; 32(2): 86-91.
- 29  
30 187. Labrecque M, Nouwen A, Bergeron M, Rancourt JF. A randomized controlled trial of nonpharmacologic approaches for relief of low back pain during labor. *The Journal of family practice* 1999; 48(4): 259-63.
- 31  
32 188. Laitinen J, Nuutinen L. Failure of transcutaneous electrical nerve stimulation and indomethacin to reduce opiate requirement following cholecystectomy. *Acta anaesthesiologica Scandinavica* 1991; 35(8): 700-5.
- 33  
34 189. Lang T, Barker R, Steinlechner B, et al. TENS relieves acute posttraumatic hip pain during emergency transport. *The Journal of trauma* 2007; 62(1): 184-8; discussion 8.
- 35  
36 190. Langley GB, Sheppard H, Johnson M, Wigley RD. The analgesic effects of transcutaneous electrical nerve stimulation and placebo in chronic pain patients. A double-blind non-crossover comparison. *Rheumatology international* 1984; 4(3): 119-23.
- 37  
38 191. Lauretti GR, Chubaci EF, Mattos AL. Efficacy of the use of two simultaneously TENS devices for fibromyalgia pain. *Rheumatology international* 2013; 33(8): 2117-22.
- 39  
40 192. Lauretti GR, Oliveira R, Parada F, Mattos AL. The New Portable Transcutaneous Electrical Nerve Stimulation Device Was Efficacious in the Control of Primary Dysmenorrhea Cramp Pain. *Neuromodulation : journal of the International Neuromodulation Society* 2015; 18(6): 522-6; discussion -7.
- 41  
42 193. Law PP, Cheing GL. Optimal stimulation frequency of transcutaneous electrical nerve stimulation on people with knee osteoarthritis. *Journal of rehabilitation medicine* 2004; 36(5): 220-5.



## 08\_OL-TABLE1\_IncludedStudies

194. Law PPW, Cheing GLY, Tsui AYY. Does transcutaneous electrical nerve stimulation improve the physical performance of people with knee osteoarthritis? *Journal of Clinical Rheumatology* 2004; 10(6): 295-9.
195. Leandri M, Parodi CI, Corrieri N, Rigardo S. Comparison of TENS treatments in hemiplegic shoulder pain. *Scandinavian journal of rehabilitation medicine* 1990; 22(2): 69-71.
196. Lee E, Chung I, Lee J, Lam P, Chin R. The role of transcutaneous electrical nerve stimulation in management of labour in obstetric patients. *Asia Oceania J Obstet Gynaecol* 1990; 16(3): 247-54.
197. Lee CH, Lee TY, Her JS, Liao WL, Hsieh CL. Single-Blinded, Randomized Preliminary Study Evaluating the Effect of Transcutaneous Electrical Nerve Stimulation on Postoperative Pain in Patients with Colles' Fracture. *Journal of alternative and complementary medicine (New York, NY)* 2015; 21(12): 754-8.
198. Lee JE, Anderson CM, Perkhounkova Y, Sleuwenhoek BM, Louison RR. Transcutaneous Electrical Nerve Stimulation Reduces Resting Pain in Head and Neck Cancer Patients A Randomized and Placebo-Controlled Double-Blind Pilot Study. *Cancer Nursing* 2019; 42(3): 218-28.
199. Leo KC, Dostal WF, Bossen DG, Eldridge VL, Fairchild ML, Evans RE. Effect of transcutaneous electrical nerve stimulation characteristics on clinical pain. *Physical therapy* 1986; 66(2): 200-5.
200. Leonard G, Cloutier C, Marchand S. Reduced analgesic effect of acupuncture-like TENS but not conventional TENS in opioid-treated patients. *The journal of pain : official journal of the American Pain Society* 2011; 12(2): 213-21.
201. Lewers D, Clelland J, Jackson J, Varner R, Bergman J. Transcutaneous electrical nerve stimulation in the relief of primary dysmenorrhea. *Physical therapy* 1989; 69(1): 3-9.
202. Lewis D, Lewis B, Sturrock R. Transcutaneous electrical nerve stimulation in osteoarthritis: a therapeutic alternative? *Annals of the rheumatic diseases* 1984; 43(1): 47-9.
203. Lewis B, Lewis D, Cumming G. The comparative analgesic efficacy of transcutaneous electrical nerve stimulation and a non-steroidal anti-inflammatory drug for painful osteoarthritis. *British journal of rheumatology* 1994; 33(5): 455-60.
204. Likar R, Molnar M, Pipam W, et al. Postoperative transcutaneous electrical nerve stimulation (TENS) in shoulder surgery (randomized, double blind, placebo controlled pilot trial). [German]. *Schmerz (Berlin, Germany)* 2001; 15(3): 158-63.
205. Lim AT, Edis G, Kranz H, Mendelson G, Selwood T, Scott DF. Postoperative pain control: contribution of psychological factors and transcutaneous electrical stimulation. *Pain* 1983; 17(2): 179-88.
206. Lima PMB, Farias RTFB, Carvalho ACA, da Silva PNC, Filho NAF, de Brito RF. Transcutaneous electrical nerve stimulation after coronary artery bypass graft surgery. *Brazilian Journal of Cardiovascular Surgery* 2011; 26(4): 591-6.
207. Limoges MF, Rickabaugh B. Evaluation of TENS during screening flexible sigmoidoscopy. *Gastroenterology nursing : the official journal of the Society of Gastroenterology Nurses and Associates* 2004; 27(2): 61-8.
208. Lin ML, Luo YJ, Hsu YM, et al. Randomized controlled trial Comparing of Analgesic Effectiveness of TPRF and TENs in Clinical and Endocrinological Changes for Chronic Shoulder Pain; 2015.
209. Lin M-L, Chiu H-W, Shih Z-M, et al. Two Transcutaneous Stimulation Techniques in Shoulder Pain: Transcutaneous Pulsed Radiofrequency (TPRF) versus Transcutaneous Electrical Nerve Stimulation (TENS): A Comparative Pilot Study. *Pain research & management* 2019; 2019: 2823401.
210. Linde C, Isacsson G, Jonsson BG. Outcome of 6-week treatment with transcutaneous electric nerve stimulation compared with splint on symptomatic temporomandibular joint disk displacement without reduction. *Acta odontologica scandinavica* 1995; 53(2): 92-8.
211. Linn SL, Granat MH, Lees KR. Prevention of shoulder subluxation after stroke with electrical stimulation. *Stroke* 1999; 30(5): 963-8.
212. Lison JF, Amer-Cuenca JJ, Piquer-Marti S, Benavent-Caballer V, Bivia-Roig G, Marin-Buck A. Transcutaneous Nerve Stimulation for Pain Relief During Office Hysteroscopy: A Randomized Controlled Trial. *Obstetrics and gynecology* 2017; 129(2): 363-70.
213. Liu YC, Liao WS, Lien IN. Effect of transcutaneous electrical nerve stimulation for post-thoracotomy pain. *Taiwan I Hsueh Hui Tsa Chih* 1985; 84(7): 801-9.
214. Liu Y, Dong Z, Wang R, et al. Migraine Prevention Using Different Frequencies of Transcutaneous Occipital Nerve Stimulation: A Randomized Controlled Trial. *The journal of pain : official journal of the American Pain Society* 2017; 18(8): 1006-15.
215. Lofgren M, Norrbrink C. Pain relief in women with fibromyalgia: a cross-over study of superficial warmth stimulation and transcutaneous electrical nerve stimulation. *Journal of rehabilitation medicine* 2009; 41(7): 557-62.
216. Luchesa CA, Greca FH, Guarita-Souza LC, Luiz Verde dos Santos J, Aquim EE. The role of electroanalgesia in patients undergoing coronary artery bypass surgery. [Portuguese]. *Brazilian Journal of Cardiovascular Surgery* 2009; 24(3): 391-6.

08\_OL-TABLE1\_IncludedStudies

- 1  
2 217. Lundeberg T. A comparative study of the pain alleviating effect of vibratory stimulation, transcutaneous electrical nerve stimulation, electroacupuncture and placebo. *The American*  
3 *journal of Chinese medicine* 1984; 12(1-4): 72-9.
- 4 218. Lundeberg T, Bondesson L, Lundstrom V. Relief of primary dysmenorrhea by transcutaneous electrical nerve stimulation. *Acta obstetrica et gynecologica Scandinavica* 1985; 64(6):  
5 491-7.
- 6 219. Machado AFP, Perracini MR, Rampazo ÉP, Driusso P, Liebano RE. Effects of thermotherapy and transcutaneous electrical nerve stimulation on patients with primary dysmenorrhea:  
7 A randomized, placebo-controlled, double-blind clinical trial. *Complementary therapies in medicine* 2019; 47: N.PAG.
- 8 220. Machin D, Lewith GT, Wylson S. Pain measurement in randomized clinical trials. A comparison of two pain scales. *Clinical Journal of Pain* 1988; 4(3): 161-8.
- 9 221. Mahure SA, Rokito AS, Kwon YW. Transcutaneous electrical nerve stimulation for postoperative pain relief after arthroscopic rotator cuff repair: a prospective double-blinded  
10 randomized trial. *Journal of shoulder and elbow surgery* 2017; 26(9): 1508-13.
- 11 222. Manigandan JB, Ganesh GS, Pattnaik M, Mohanty P. Effect of electrical stimulation to long head of biceps in reducing gleno humeral subluxation after stroke. *NeuroRehabilitation*  
12 2014; 34(2): 245-52.
- 13 223. Mannheimer C, Carlsson C. The analgesic effect of transcutaneous electrical nerve stimulation (TNS) in patients with rheumatoid arthritis. A comparative study of different pulse  
14 patterns. *Pain* 1979; 6(3): 329-34.
- 15 224. Mannheimer J, Whalen E. The efficacy of transcutaneous electric nerve stimulation in dysmenorrhea. *Clinical Journal of Pain* 1985; 1: 75-83.
- 16 225. Mannheimer C, Lund S, Carlsson CA. The effect of transcutaneous electrical nerve stimulation (TNS) on joint pain in patients with rheumatoid arthritis. *Scandinavian journal of*  
17 *rheumatology* 1978; 7(1): 13-6.
- 18 226. Mannheimer C, Carlsson C, Emanuelsson H, Vedin A, Waagstein F, Wilhelmsson C. The effects of transcutaneous electrical nerve stimulation in patients with severe angina pectoris.  
19 *Circulation* 1985; 71(2): 308-16.
- 20 227. Mansourian A, Pourshahidi S, Sadrzadeh-Afshar MS, Ebrahimi H. A Comparative Study of Low-Level Laser Therapy and Transcutaneous Electrical Nerve Stimulation as an Adjunct  
21 to Pharmaceutical Therapy for Myofascial Pain Dysfunction Syndrome: A Randomized Clinical Trial. *Frontiers in dentistry* 2019; 16(4): 256-64.
- 22 228. Mansuri B, Torabinezhad F, Jamshidi AA, Dabirmoghaddam P, Vasaghi-Gharamaleki B, Ghelichi L. Application of High-Frequency Transcutaneous Electrical Nerve Stimulation in  
23 Muscle Tension Dysphonia Patients With the Pain Complaint: The Immediate Effect. *Journal of Voice* 2019.
- 24 229. Mansuri B, Torabinezhad F, Jamshidi AA, Dabirmoghaddam P, Vasaghi-Gharamaleki B, Ghelichi L. Transcutaneous Electrical Nerve Stimulation Combined With Voice Therapy in  
25 Women With Muscle Tension Dysphonia. *Journal of Voice* 2020; 34(3): 490.e111-.e21.
- 26 230. Marchand S, Charest J, Li J, Chenard J, Lavignolle B, Laurencelle L. Is TENS purely a placebo effect? A controlled study on chronic low back pain [see comments]. *Pain* 1993; 54(1):  
27 99-106.
- 28 231. Mascarin NC, Vancini RL, Andrade ML, Magalhaes Ede P, de Lira CA, Coimbra IB. Effects of kinesiotherapy, ultrasound and electrotherapy in management of bilateral knee  
29 osteoarthritis: prospective clinical trial. *BMC musculoskeletal disorders* 2012; 13: 182.
- 30 232. McCallum M, Glynn C, Moore R, Lammer P, Phillips A. Transcutaneous electrical nerve stimulation in the management of acute postoperative pain. *British journal of anaesthesia*  
31 1988; 61(3): 308-12.
- 32 233. Melzack R, Vetere P, Finch L. Transcutaneous electrical nerve stimulation for low back pain. A comparison of TENS and massage for pain and range of motion. *Physical therapy*  
33 1983; 63(4): 489-93.
- 34 234. Merrill D. Clinical evaluation of FasTENS, an inexpensive, disposable transcutaneous electrical nerve stimulator designed specifically for postoperative electroanalgesia. *Urology*  
35 1989; 33(1): 27-30.
- 36 235. Miller L, Mattison P, Paul L, Wood L. The effects of transcutaneous electrical nerve stimulation (TENS) on spasticity in multiple sclerosis. *Multiple sclerosis (Houndmills,*  
37 *Basingstoke, England)* 2007; 13(4): 527-33.
- 38 236. Milsom I, Hedner N, Mannheimer C. A comparative study of the effect of high-intensity transcutaneous nerve stimulation and oral naproxen on intrauterine pressure and menstrual  
39 pain in patients with primary dysmenorrhea. *American journal of obstetrics and gynecology* 1994; 170(1 Pt 1): 123-9.
- 40 237. Moharic M, Marincek C, Vidmar G, Burger H. TRANSCUTANEOUS ELECTRICAL NERVE STIMULATION, PREGABALIN AND THEIR COMBINATION IN PATIENTS  
41 WITH PAINFUL DIABETIC NEUROPATHY: EFFECTS ON PAIN AND QUALITY OF LIFE. *Zdravniski Vestnik-Slovenian Medical Journal* 2009; 78(8): 371-80.
- 42 238. Mondal P, Biswas M, Saha J, Middhya AK. Effect of Trigger Point Injection Vs Ultrasonic Therapy Vs Transcutaneous Electrical Nerve Stimulation in Rehabilitation of Cervical and  
43 Peri-Scapular Myofascial Pain Syndrome- a Randomized Clinical Trial. *Journal of Evolution of Medical and Dental Sciences-Jemds* 2019; 8(7): 430-6.



08\_OL-TABLE1\_IncludedStudies

- 1  
2 239. Moore SR, Shurman J. Combined neuromuscular electrical stimulation and transcutaneous electrical nerve stimulation for treatment of chronic back pain: a double-blind, repeated  
3 measures comparison. *Archives of physical medicine and rehabilitation* 1997; 78(1): 55-60.
- 4 240. Mora B, Giorni E, Dobrovits M, et al. Transcutaneous electrical nerve stimulation: an effective treatment for pain caused by renal colic in emergency care. *The Journal of urology*  
5 2006; 175(5): 1737-41; discussion 41.
- 6 241. Morgan B, Jones AR, Mulcahy KA, Finlay DB, Collett B. Transcutaneous electric nerve stimulation (TENS) during distension shoulder arthrography: a controlled trial. *Pain* 1996;  
7 64(2): 265-7.
- 8 242. Møystad A, Krogstad BS, Larheim TA. Transcutaneous nerve stimulation in a group of patients with rheumatic disease involving the temporomandibular joint. *Journal of prosthetic*  
9 *dentistry* 1990; 64(5): 596-600.
- 10 243. Murray S, Collins PD, James MA. An investigation into the 'carry over' effect of neurostimulation in the treatment of angina pectoris. *International journal of clinical practice* 2004;  
11 58(7): 669-74.
- 12 244. Mutlu B, Paker N, Bugdayci D, Tekdos D, Kesiktaş N. Efficacy of supervised exercise combined with transcutaneous electrical nerve stimulation in women with fibromyalgia: a  
13 prospective controlled study. *Rheumatology international* 2013; 33(3): 649-55.
- 14 245. Nabi BN, Sedighinejad A, Haghighi M, et al. Comparison of transcutaneous electrical nerve stimulation and pulsed radiofrequency sympathectomy for treating painful diabetic  
15 neuropathy. 2015; 5(5).
- 16 246. Nash TP, Williams JD, Machin D. TENS: Does the type of stimulus really matter? *Pain Clinic* 1990; 3(3): 161-8.
- 17 247. Navarathnam RG, Wang IY, Thomas D, Klineberg PL. Evaluation of the transcutaneous electrical nerve stimulator for postoperative analgesia following cardiac surgery. *Anaesthesia*  
18 *and intensive care* 1984; 12(4): 345-50.
- 19 248. Neary J. Transcutaneous electrical nerve stimulation for the relief of post-incisional surgical pain. *AANA J* 1981; 49(2): 151-5.
- 20 249. Neighbours LE, Clelland J, Jackson JR, Bergman J, Orr J. Transcutaneous electrical nerve stimulation for pain relief in primary dysmenorrhea. *The Clinical journal of pain* 1987; 3(1):  
21 17-22.
- 22 250. Nesheim BI. The use of transcutaneous nerve stimulation for pain relief during labor. A controlled clinical study. *Acta obstetrica et gynecologica Scandinavica* 1981; 60(1): 13-6.
- 23 251. Neumark J, Pauser G, Scherzer W. Pain relief in childbirth; an analysis of the analgesic effects of transcutaneous nerve stimulation (TNS), pethidine and placebos (author's transl).  
24 *Praktische anesthesie, wiederbelebung und intensivtherapie* 1978; 13(1): 13-20.
- 25 252. Ng MM, Leung MC, Poon DM. The effects of electro-acupuncture and transcutaneous electrical nerve stimulation on patients with painful osteoarthritic knees: a randomized  
26 controlled trial with follow-up evaluation. *Journal of alternative and complementary medicine (New York, NY)* 2003; 9(5): 641-9.
- 27 253. Nordemar R, Thorner C. Treatment of acute cervical pain - A comparative group study. *Pain* 1981; 10(1): 93-101.
- 28 254. Norrbrink C. Transcutaneous electrical nerve stimulation for treatment of spinal cord injury neuropathic pain. *Journal of rehabilitation research and development* 2009; 46(1): 85-93.
- 29 255. Olsén MF, Elden H, Janson ED, Lilja H, Stener-Victorin E. A comparison of high- versus low-intensity, high-frequency transcutaneous electric nerve stimulation for painful  
30 postpartum uterine contractions. *Acta obstetrica et gynecologica Scandinavica* 2007; 86(3): 310-4.
- 31 256. Fagevik Olsen M, Bjordahl S, Stahl A, Borjesson S, Sundemo A, Gutke A. Effects of high-intensity high-frequency transcutaneous electric nerve stimulation in primary  
32 dysmenorrhea-a randomised cross-over pilot study. *European Journal of Physiotherapy* 2019.
- 33 257. Oncel M, Sencan S, Yildiz H, Kurt N. Transcutaneous electrical nerve stimulation for pain management in patients with uncomplicated minor rib fractures. *European journal of*  
34 *cardio-thoracic surgery : official journal of the European Association for Cardio-thoracic Surgery* 2002; 22(1): 13-7.
- 35 258. Oosterhof J, De Boo TM, Oostendorp RA, Wilder-Smith OH, Crul BJ. Outcome of transcutaneous electrical nerve stimulation in chronic pain: short-term results of a double-blind,  
36 randomised, placebo-controlled trial. *The journal of headache and pain* 2006; 7(4): 196-205.
- 37 259. Oosterhof J, Samwel HJ, de Boo TM, Wilder-Smith OH, Oostendorp RA, Crul BJ. Predicting outcome of TENS in chronic pain: a prospective, randomized, placebo controlled trial.  
38 *Pain* 2008; 136(1-2): 11-20.
- 39 260. Oosterhof J, Wilder-Smith OH, de Boo T, Oostendorp RA, Crul BJ. The long-term outcome of transcutaneous electrical nerve stimulation in the treatment for patients with chronic  
40 pain: a randomized, placebo-controlled trial. *Pain practice : the official journal of World Institute of Pain* 2012; 12(7): 513-22.
- 41 261. Oosterhof J, Wilder-Smith OH, Oostendorp RA, Crul BJ. Different mechanisms for the short-term effects of real versus sham transcutaneous electrical nerve stimulation (TENS) in  
42 patients with chronic pain: a pilot study. *Journal of pain & palliative care pharmacotherapy* 2012; 26(1): 5-12.

08\_OL-TABLE1\_IncludedStudies

- 1  
2 262. Ordog GJ. Transcutaneous electrical nerve stimulation versus oral analgesic: a randomized double-blind controlled study in acute traumatic pain. *The American journal of emergency medicine* 1987; 5(1): 6-10.
- 3  
4 263. Ozkaraoglu DK, Tarakci D, Algun ZC. Comparison of two different electrotherapy methods in low back pain treatment. *Journal of Back & Musculoskeletal Rehabilitation* 2020; 33(2): 193-9.
- 5  
6 264. Ozkul C, Kilinc M, Yildirim SA, Topcuoglu EY, Akyuz M. Effects of visual illusion and transcutaneous electrical nerve stimulation on neuropathic pain in patients with spinal cord injury: A randomised controlled cross-over trial. *Journal of back and musculoskeletal rehabilitation* 2015; 28(4): 709-19.
- 7  
8 265. Oztas B, Iyigun E. The effects of two different electrical stimulation methods on the pain intensity of the patients who had undergone abdominal surgery with a midline incision: Randomized Controlled Clinical Trial. *Contemporary nurse* 2019: 1-21.
- 9  
10 266. Ozturk NK, Baki ED, Kavakli AS, et al. Comparison of Transcutaneous Electrical Nerve Stimulation and Parasternal Block for Postoperative Pain Management after Cardiac Surgery. *Pain research & management* 2016; 2016: 4261949.
- 11  
12 267. Padma, Prasanna A, Urala. Transcutaneous electrical nerve stimulation and labor pain. *Bahrain Medical Bulletin* 2000; 22(1): 13-7.
- 13  
14 268. Paker N, Tekdos D, Kesiktas N, Soy D. Comparison of the therapeutic efficacy of TENS versus intra-articular hyaluronic acid injection in patients with knee osteoarthritis: a prospective randomized study. *Advances in therapy* 2006; 23(2): 342-53.
- 15  
16 269. Palmer S, Domaille M, Cramp F, et al. Transcutaneous electrical nerve stimulation as an adjunct to education and exercise for knee osteoarthritis: a randomized controlled trial. *Arthritis care & research* 2014; 66(3): 387-94.
- 17  
18 270. Pan P, Chou C, Chiou H, Ma H, Lee H, Chan R. Extracorporeal shock wave therapy for chronic calcific tendinitis of the shoulders: a functional and sonographic study. *Archives of Physical Medicine & Rehabilitation* 2003; 84(7): 988-93.
- 19  
20 271. Park C, Choi JB, Lee YS, et al. The effect of intra-operative transcutaneous electrical nerve stimulation on posterior neck pain following thyroidectomy. *Anaesthesia* 2015; 70(4): 434-9.
- 21  
22 272. Patil SR, Aileni KR. Effect of transcutaneous electrical nerve stimulation versus home exercise programme in management of temporomandibular joint disorder. *Journal of Clinical and Diagnostic Research* 2017; 11(12): ZC19-ZC22.
- 23  
24 273. Peacock KS, Stoerkel E, Libretto S, et al. A randomized trial comparing the Tennant Biomodulator to transcutaneous electrical nerve stimulation and traditional Chinese acupuncture for the treatment of chronic pain in military service members. *Military Medical Research* 2019; 6(1): 37.
- 25  
26 274. Pietrosimone BG, Hart JM, Saliba SA, Hertel J, Ingersoll CD. Immediate effects of transcutaneous electrical nerve stimulation and focal knee joint cooling on quadriceps activation. *Medicine and science in sports and exercise* 2009; 41(6): 1175-81.
- 27  
28 275. Pietrosimone BG, Saliba SA, Hart JM, Hertel J, Kerrigan DC, Ingersoll CD. Effects of transcutaneous electrical nerve stimulation and therapeutic exercise on quadriceps activation in people with tibiofemoral osteoarthritis. *The Journal of orthopaedic and sports physical therapy* 2011; 41(1): 4-12.
- 29  
30 276. Pietrosimone BG, Saliba SA, Hart JM, Hertel J, Kerrigan DC, Ingersoll CD. Effects of disinhibitory transcutaneous electrical nerve stimulation and therapeutic exercise on sagittal plane peak knee kinematics and kinetics in people with knee osteoarthritis during gait: a randomized controlled trial. *Clinical rehabilitation* 2010; 24(12): 1091-101.
- 31  
32 277. Pietrosimone B, Luc-Harkey BA, Harkey MS, et al. Using TENS to Enhance Therapeutic Exercise in Individuals with Knee Osteoarthritis. *Medicine and science in sports and exercise* 2020.
- 33  
34 278. Pike PM. Transcutaneous electrical stimulation. Its use in the management of postoperative pain. *Anaesthesia* 1978; 33(2): 165-71.
- 35  
36 279. Pitangui AC, de Sousa L, Gomes FA, Ferreira CH, Nakano AM. High-frequency TENS in post-episiotomy pain relief in primiparous puerpere: a randomized, controlled trial. *The journal of obstetrics and gynaecology research* 2012; 38(7): 980-7.
- 37  
38 280. Pitangui AC, Araújo RC, Bezerra MJ, Ribeiro CO, Nakano AM. Low and high-frequency TENS in post-episiotomy pain relief: a randomized, double-blind clinical trial. *Brazilian journal of physical therapy* 2014; 18(1): 72-8.
- 39  
40 281. Platon B, Andrell P, Raner C, Rudolph M, Dvoretzky A, Mannheimer C. High-frequency, high-intensity transcutaneous electrical nerve stimulation as treatment of pain after surgical abortion. *Pain* 2010; 148(1): 114-9.
- 41  
42 282. Platon B, Mannheimer C, Andrell P. Effects of high-frequency, high-intensity transcutaneous electrical nerve stimulation versus intravenous opioids for pain relief after gynecologic laparoscopic surgery: a randomized controlled study. *Korean Journal of Anesthesiology* 2018; 71(2): 149-56.
- 43  
44 283. Prabhakar R, Ramteke G. Cervical Spinal Mobilization Versus TENS in the Management of Cervical Radiculopathy: A Comparative, Experimental, Randomized controlled trial. *Indian Journal of Physiotherapy and Occupational Therapy* 2011; 5(2): 128-33.
- 45  
46

## 08\_OL-TABLE1\_IncludedStudies

- 1
- 2 284. Presser M, Birkhan J, Adler R, Hanani A, Eisenberg E. Transcutaneous electrical nerve stimulation (TENS) during epidural steroids injection: a randomized controlled trial. *Pain Clinic* 2000; 12(2): 77-80.
- 3
- 4 285. Rainov NG, Heidecke V, Albertz C, Burkert W. Transcutaneous electrical nerve stimulation (TENS) for acute postoperative pain after spinal surgery. *European Journal of Pain* 1994; 15(2-3): 44-9.
- 5
- 6 286. Rajfur J, Pasternok M, Rajfur K, et al. Efficacy of Selected Electrical Therapies on Chronic Low Back Pain: a Comparative Clinical Pilot Study. *Medical science monitor* 2017; 23: 85-100.
- 7
- 8 287. Rajpurohit B, Khatri SM, Metgud D, Bagewadi A. Effectiveness of transcutaneous electrical nerve stimulation and microcurrent electrical nerve stimulation in bruxism associated with masticatory muscle pain--a comparative study. *Indian journal of dental research : official publication of Indian Society for Dental Research* 2010; 21(1): 104-6.
- 9
- 10 288. Rakel B, Frantz R. Effectiveness of transcutaneous electrical nerve stimulation on postoperative pain with movement. *The journal of pain : official journal of the American Pain Society* 2003; 4(8): 455-64.
- 11
- 12 289. Rakel BA, Zimmerman MB, Geasland K, et al. Transcutaneous electrical nerve stimulation for the control of pain during rehabilitation after total knee arthroplasty: A randomized, blinded, placebo-controlled trial. *Pain* 2014; 155(12): 2599-611.
- 13
- 14 290. Ramanathan D, Saleh A, Klika AK, Higuera CA, Barsoum WK. The Use of Transcutaneous Electrical Nerve Stimulation After Total Knee Arthroplasty: A Prospective Randomized Controlled Trial. *Surgical technology international* 2017; 30: 425-34.
- 15
- 16 291. Ramos LAV, Callegari B, Franca FJR, et al. Comparison Between Transcutaneous Electrical Nerve Stimulation and Stabilization Exercises in Fatigue and Transversus Abdominis Activation in Patients With Lumbar Disk Herniation: A Randomized Study. *Journal of manipulative and physiological therapeutics* 2018; 41(4): 323-31.
- 17
- 18 292. Rani P, Kalyani V, Goyal T, Yadav R, Mishra R. Effect of Transcutaneous Electrical Nerve Stimulation Therapy on Pain and Functional Disability Level among Patients with Rotator Cuff Disease- a Randomized Controlled Trial. *International Journal of Physiotherapy* 2020; 7(1): 7-13.
- 19
- 20 293. Ratajczak B, Hawrylak A, Demidaś A, Kuciel-Lewandowska J, Boerner E. Effectiveness of diadynamic currents and transcutaneous electrical nerve stimulation in disc disease lumbar part of spine. *Journal of Back & Musculoskeletal Rehabilitation* 2011; 24(3): 155-9.
- 21
- 22 294. Rawat B, Genz A, Fache JS, Ong M, Coldman AJ, Burhenne HJ. Effectiveness of transcutaneous electrical nerve stimulation (TENS) for analgesia during biliary lithotripsy. *Invest Radiol* 1991; 26(10): 866-9.
- 23
- 24 295. Renovato França FJ, Nogueira Burke T, Oliveira Magalhães M, et al. Motor Control Training Compared With Transcutaneous Electrical Nerve Stimulation in Patients With Disc Herniation With Associated Radiculopathy: A Randomized Controlled Trial. *American journal of physical medicine & rehabilitation* 2019; 98(3): 207-14.
- 25
- 26 296. Reuss R, Cronen P, Abplanalp L. Transcutaneous electrical nerve stimulation for pain control after cholecystectomy: lack of expected benefits. *Southern medical journal* 1988; 81(11): 1361-3.
- 27
- 28 297. Revadkar MT, Bhojwani TM. Comparison of the Effectiveness of Transcutaneous Electrical Nerve Stimulation (Tens) Vs. Interferential Therapy (Ift) for Relief of Pain in Primary Dysmenorrhea. *International Journal of Physiotherapy* 2019; 6(6): 263-7.
- 29
- 30 298. Ringel G, Taubert K. Zur effektivitat der transkutanen elektrischen nervenstimulation bei migrane (The efficacy of transcutaneous nerve stimulation in migraine) [German]. *Zeitschrift fur Physiotherapie* 1991 Jan;43(1):8-11 1991.
- 31
- 32 299. Robb KA, Newham DJ, Williams JE. Transcutaneous electrical nerve stimulation vs. transcutaneous spinal electroanalgesia for chronic pain associated with breast cancer treatments. *Journal of pain and symptom management* 2007; 33(4): 410-9.
- 33
- 34 300. Robinson R, Darlow S, Wright SJ, et al. Is transcutaneous electrical nerve stimulation an effective analgesia during colonoscopy? *Postgraduate medical journal* 2001; 77(909): 445-6.
- 35
- 36 301. Roche PA, Gijbsbers K, Belch JJ, Forbes CD. Modification of haemophilic haemorrhage pain by transcutaneous electrical nerve stimulation. *Pain* 1985; 21(1): 43-8.
- 37
- 38 302. Rooney SM, Jain S, Goldiner PL. Effect of transcutaneous nervous stimulation on postoperative pain after thoracotomy. *Anesthesia and analgesia* 1983; 62(11): 1010-2.
- 39
- 40 303. Rosenberg M, Curtis L, Bourke D. Transcutaneous electrical nerve stimulation for the relief of postoperative pain. *Pain* 1978; 5(2): 129-33.
- 41
- 42 304. Rutgers MJ, Van-Romunde L, Osman P. A small randomised comparative trial of acupuncture verses transcutaneous electrical neurostimulation in postherpetic neuralgia. *Pain Clinic* 1988; 2: 87-9.
- 43
- 44 305. Sadala AY, Machado AFP, Liebano RE. Effects of transcutaneous electrical nerve stimulation on pain intensity during application of carboxytherapy in patients with cellulite: A randomized placebo-controlled trial. *Journal of cosmetic dermatology* 2018; 17(6): 1175-81.
- 45
- 46 306. Sahin N, Albayrak I, Ugurlu H. Effect of different transcutaneous electrical stimulation modalities on cervical myofascial pain syndrome. *Journal of Musculoskeletal Pain* 2011; 19(1): 18-23.

08\_OL-TABLE1\_IncludedStudies

- 1  
2 307. Samadzadeh S, Rezavand N, Yari M, Rezaei M, Faizmahdavi H, Hematti M. Comparison of Entonox and Transcutaneous Electrical Nerve Stimulation (TENS) in labor pain. *Journal of Medical and Biomedical Sciences* 2017; 6(2): 11-6.
- 3  
4 308. Sangtong K, Chupinijrobkob C, Putthakumnerd W, Kuptniratsaikul V. Does adding transcutaneous electrical nerve stimulation to therapeutic ultrasound affect pain or function in people with osteoarthritis of the knee? A randomized controlled trial. *Clinical rehabilitation* 2019; 33(7): 1197-205.
- 5  
6 309. Santamato A, Notarnicola A, Panza F, et al. SBOTE study: Extracorporeal shock wave therapy versus electrical stimulation after botulinum toxin type a injection for post-stroke spasticity-a prospective randomized trial. *Ultrasound in Medicine and Biology* 2013; 39(2): 283-91.
- 7  
8 310. Santana LS, Gallo RB, Ferreira CH, Duarte G, Quintana SM, Marcolin AC. Transcutaneous electrical nerve stimulation (TENS) reduces pain and postpones the need for pharmacological analgesia during labour: a randomised trial. *Journal of physiotherapy* 2016; 62(1): 29-34.
- 9  
10 311. Saranya B, Ahmed J, Shenoy N, Ongole R, Sujir N, Natarajan S. Comparison of Transcutaneous Electric Nerve Stimulation (TENS) and Microcurrent Nerve Stimulation (MENS) in the Management of Masticatory Muscle Pain: A Comparative Study. *Pain research & management* 2019; 2019: 8291624.
- 11  
12 312. Sayilir S, Yildizgoren MT. The medium-term effects of diadynamic currents in chronic low back pain; TENS versus diadynamic currents: a randomised, follow-up study. *Complementary therapies in clinical practice* 2017; 29: 16-9.
- 13  
14 313. Seo HG, Bang MS, Chung SG, Jung SH, Lee S-U. Effect of Electrical Stimulation on Botulinum Toxin A Therapy in Patients With Chronic Myofascial Pain Syndrome: A 16-Week Randomized Double-Blinded Study. *Archives of Physical Medicine & Rehabilitation* 2013; 94(3): 412-8.
- 15  
16 314. Serry ZMH, Mossa G, Elhabashy H, et al. Transcutaneous nerve stimulation versus aerobic exercise in diabetic neuropathy. *Egyptian Journal of Neurology, Psychiatry and Neurosurgery* 2016; 53(2): 124-9.
- 17  
18 315. Sezen CB, Akboga SA, Celik A, Kalafat CE, Tastepe AI. Transcutaneous electrical nerve stimulation effect on postoperative complications. *Asian cardiovascular & thoracic annals* 2017; 25(4): 276-80.
- 19  
20 316. Shahoei R, Shahghebi S, Rezaei M, Naqshbandi S. The effect of transcutaneous electrical nerve stimulation on the severity of labor pain among nulliparous women: A clinical trial. *Complementary therapies in clinical practice* 2017; 28: 176-80.
- 21  
22 317. Shehab D, Adham N. Comparative effectiveness of ultrasound and transcutaneous electrical stimulation in treatment of periarticular shoulder pain. *Physiother Can* 2000; 52(3): 208-14.
- 23  
24 318. Sherry E, Kitchener P, Smart R. A prospective randomized controlled study of VAX-D and TENS for the treatment of chronic low back pain. *Neurological research* 2001; 23(7): 780-4.
- 25  
26 319. Shimoji K, Takahashi N, Nishio Y, Koyanagi M, Aida S. Pain relief by transcutaneous electric nerve stimulation with bidirectional modulated sine waves in patients with chronic back pain: a randomized, double-blind, sham-controlled study. *Neuromodulation* 2007 Jan;10(1):42-51 2007.
- 27  
28 320. Shimoura K, Iijima H, Suzuki Y, Aoyama T. Immediate Effects of Transcutaneous Electrical Nerve Stimulation on Pain and Physical Performance in Individuals With Preradiographic Knee Osteoarthritis: A Randomized Controlled Trial. *Archives of Physical Medicine & Rehabilitation* 2019; 100(2): 300-.
- 29  
30 321. Shoukry RA, Al-Ansary AM. Transcutaneous Electric Nerve Stimulation (TENS) for pain relief during Extracorporeal Shock-Wave Lithotripsy (ESWL). *Egyptian Journal of Anaesthesia* 2019; 35(1): 65-70.
- 31  
32 322. Siemens W, Boehlke C, Bennett MI, Offner K, Becker G, Gaertner J. Transcutaneous electrical nerve stimulation for advanced cancer pain inpatients in specialist palliative care—a blinded, randomized, sham-controlled pilot cross-over trial. *Supportive Care in Cancer* 2020.
- 33  
34 323. Sikiru L, Shmaila H, Muhammed SA. Transcutaneous electrical nerve stimulation (TENS) in the symptomatic management of chronic prostatitis/chronic pelvic pain syndrome: a placebo-control randomized trial. *International braz j urol : official journal of the Brazilian Society of Urology* 2008; 34(6): 708-13; discussion 14.
- 35  
36 324. Silva MB, de Melo PR, de Oliveira NM, Crema E, Fernandes LF. Analgesic effect of transcutaneous electrical nerve stimulation after laparoscopic cholecystectomy. *American journal of physical medicine & rehabilitation* 2012; 91(8): 652-7.
- 37  
38 325. Silva JG, Gonçalves Santana C, Inocencio KR, Orsini M, Machado S, Bergmann A. Electrocortical Analysis of Patients with Intercostobrachial Pain Treated with TENS after Breast Cancer Surgery. *Journal of Physical Therapy Science* 2014; 26(3): 349-53.
- 39  
40 326. Sim DT. Effectiveness of transcutaneous electrical nerve stimulation following cholecystectomy. *Physiotherapy* 1991; 77(10): 715-22.
- 41  
42 327. Siqueira LTD, Ribeiro VV, Moreira PAM, Brasolotto AG, de Jesus Guirro RR, Alves Silverio KC. Effects of transcutaneous electrical nervous stimulation (TENS) associated with vocal therapy on musculoskeletal pain of women with behavioral dysphonia: A randomized, placebo-controlled double-blind clinical trial. *Journal of communication disorders* 2019; 82: N.PAG.



## 08\_OL-TABLE1\_IncludedStudies

- 1  
2 328. Sloan JP, Muwanga CL, Waters EA, Dove AF, Dave SH. Multiple rib fractures: transcutaneous nerve stimulation versus conventional analgesia. *The Journal of trauma* 1986; 26(12):  
3 1120-2.
- 4 329. Smania N, Corato E, Fiaschi A, Pietropoli P, Aglioti SM, Tinazzi M. Repetitive magnetic stimulation: a novel therapeutic approach for myofascial pain syndrome. *Journal of*  
5 *neurology* 2005; 252(3): 307-14.
- 6 330. Smedley F, Taube M, Wastell C. Transcutaneous electrical nerve stimulation for pain relief following inguinal hernia repair: a controlled trial. *European surgical research* *Europaische*  
7 *chirurgische Forschung Recherches chirurgicales europeennes* 1988; 20(4): 233-7.
- 8 331. Smith C, Lewith G, Machin D. Preliminary study to establish a controlled method of assessing transcutaneous nerve stimulation as a treatment for the pain caused by osteoarthritis of  
9 the knee. *Physiotherapy* 1983; 69: 266-8.
- 10 332. Smith C, Guralnick M, Gelfand M, Jeans M. The effects of transcutaneous electrical nerve stimulation on post-cesarean pain. *Pain* 1986; 27(2): 181-93.
- 11 333. Sodipo JO, Adedeji SA, Olumide O. Postoperative pain relief by transcutaneous electrical nerve stimulation (TENS). *The American journal of Chinese medicine* 1980; 8(1-2): 190-4.
- 12 334. Solak O, Turna A, Pekcolaklar A, Metin M, Sayar A, Gurses A. Transcutaneous electric nerve stimulation for the treatment of postthoracotomy pain: a randomized prospective study.  
13 *The Thoracic and cardiovascular surgeon* 2007; 55(3): 182-5.
- 14 335. Solak O, Emmiler M, Ela Y, et al. Comparison of continuous and intermittent transcutaneous electrical nerve stimulation in postoperative pain management after coronary artery  
15 bypass grafting: A randomized, placebo-controlled prospective study. *Heart Surgery Forum* 2009; 12(5): E266-E71.
- 16 336. Sonde L, Gip C, Fernaeus SE, Nilsson CG, Viitanen M. Stimulation with low frequency (1.7 Hz) transcutaneous electric nerve stimulation (low-tens) increases motor function of the  
17 post-stroke paretic arm. *Scandinavian journal of rehabilitation medicine* 1998; 30(2): 95-9.
- 18 337. Stepanovic A, Kolsek M, Kersnik J, Erculj V. Prevention of post-herpetic neuralgia using transcutaneous electrical nerve stimulation. *Wiener klinische Wochenschrift* 2015; 127(9-  
19 10): 369-74.
- 20 338. Steptoe P, Bo JO. Pain-relieving effect of transcutaneous nerve stimulation during delivery. A study among primiparas. *Ugeskrift for laeger* 1984; 146(42): 3186-8.
- 21 339. Stratton S, Smith M. Postoperative thoracotomy. Effect of transcutaneous electrical nerve stimulation on forced vital capacity. *Physical therapy* 1980; 60(1): 45-7.
- 22 340. Stubbing JF, Jellicoe JA. Transcutaneous electrical nerve stimulation after thoracotomy. Pain relief and peak expiratory flow rate--a trial of transcutaneous electrical nerve stimulation.  
23 *Anaesthesia* 1988; 43(4): 296-8.
- 24 341. Suh HR, Kim TH, Han GS. The Effects of High-Frequency Transcutaneous Electrical Nerve Stimulation for Dental Professionals with Work-Related Musculoskeletal Disorders: A  
25 Single-Blind Randomized Placebo-Controlled Trial. *Evidence-Based Complementary and Alternative Medicine* 2015.
- 26 342. Talbot LA, Solomon Z, Webb L, Morrell C, Metter EJ. Electrical Stimulation Therapies for Active Duty Military with Patellofemoral Pain Syndrome: A Randomized Trial. *Military*  
27 *medicine* 2020.
- 28 343. Tantawy SA, Kamel DM, Abdelbasset WK. Does transcutaneous electrical nerve stimulation reduce pain and improve quality of life in patients with idiopathic chronic orchialgia? A  
29 randomized controlled trial. *Journal of Pain Research* 2018; 11: 77-82.
- 30 344. Taylor P, Hallett M, Flaherty L. Treatment of osteoarthritis of the knee with transcutaneous electrical nerve stimulation. *Pain* 1981; 11(2): 233-40.
- 31 345. Taylor A, West B, Simon B, Skelton J, Rowlingson J. How effective is TENS for acute pain? *Am J Nurs* 1983; 83(8): 1171-4.
- 32 346. Thakur R, Patidar RJJOGI. Comparative study of transcutaneous electrical nerve stimulation (TENS) and tramadol hydrochloride for pain relief in labor. 2004; 54(4): 346-50.
- 33 347. Thomas IL, Tyle V, Webster J, Neilson A. An evaluation of transcutaneous electrical nerve stimulation for pain relief in labour. *The Australian & New Zealand journal of obstetrics &*  
34 *gynaecology* 1988; 28(3): 182-9.
- 35 348. Thomas M, Lundeberg T, Bjork G, Lundstrom-Lindstedt V. Pain and discomfort in primary dysmenorrhea is reduced by preemptive acupuncture or low frequency TENS. *European*  
36 *Journal of Physical Medicine and Rehabilitation* 1995; 5(3): 71-6.
- 37 349. Thorsteinsson G, Stonnington HH, Stillwell GK, Elveback LR. The placebo effect of transcutaneous electrical stimulation. *Pain* 1978; 5(1): 31-41.
- 38 350. Tilak M, Isaac SA, Fletcher J, et al. Mirror Therapy and Transcutaneous Electrical Nerve Stimulation for Management of Phantom Limb Pain in Amputees - A Single Blinded  
39 Randomized Controlled Trial. *Physiotherapy research international : the journal for researchers and clinicians in physical therapy* 2016; 21(2): 109-15.
- 40 351. Tokuda M, Tabira K, Masuda T, Nishiwada T, Shomoto K. Effect of modulated-frequency and modulated-intensity transcutaneous electrical nerve stimulation after abdominal  
41 surgery: a randomized controlled trial. *The Clinical journal of pain* 2014; 30(7): 565-70.
- 42 352. Tonella RM, Araujo S, Da Silva AMO. Transcutaneous electrical nerve stimulation in the relief of pain related to physical therapy after abdominal surgery. [Portuguese, English].  
43 *Revista brasileira de anesthesiologia* 2006; 56(6): 630-42.

08\_OL-TABLE1\_IncludedStudies

- 1  
2 353. Topuz O, Ozfidan E, Ozgen M, Ardic F. Efficacy of transcutaneous electrical nerve stimulation and percutaneous neuromodulation therapy in chronic low back pain. *Journal of back and musculoskeletal rehabilitation* 2004; 17(3-4): 127-33.
- 3  
4 354. Tosato J, Biasotto-Gonzalez D, Caria PJFP. Effect of massage therapy and of transcutaneous electrical nerve stimulation on pain and electromyographic activity in patients with temporomandibular dysfunction. 2007; 14: 21-6.
- 5  
6 355. Treacy K. Awareness/relaxation training and transcutaneous electrical neural stimulation in the treatment of bruxism. *Journal of oral rehabilitation* 1999; 26(4): 280-7.
- 7  
8 356. Tsen LC, Thomas J, Segal S, Datta S, Bader AM. Transcutaneous electrical nerve stimulation does not augment combined spinal epidural labour analgesia. *Canadian journal of anaesthesia = Journal canadien d'anesthésie* 2000; 47(1): 38-42.
- 9  
10 357. Tsen LC, Thomas J, Segal S, Datta S, Bader AM. Transcutaneous electrical nerve stimulation does not augment epidural labor analgesia. *Journal of clinical anesthesia* 2001; 13(8): 571-5.
- 11  
12 358. Tsukayama H, Yamashita H, Amagai H, Tanno Y. Randomised controlled trial comparing the effectiveness of electroacupuncture and TENS for low back pain: a preliminary study for a pragmatic trial. *Acupuncture in medicine : journal of the British Medical Acupuncture Society* 2002; 20(4): 175-80.
- 13  
14 359. Tucker DL, Rockett M, Hasan M, Poplar S, Rule SA. Does transcutaneous electrical nerve stimulation (TENS) alleviate the pain experienced during bone marrow sampling in addition to standard techniques? A randomised, double-blinded, controlled trial. *Journal of clinical pathology* 2015; 68(6): 479-83.
- 15  
16 360. Tugay N, Akbayrak T, Demirturk F, et al. Effectiveness of transcutaneous electrical nerve stimulation and interferential current in primary dysmenorrhea. *Pain medicine (Malden, Mass)* 2007; 8(4): 295-300.
- 17  
18 361. Tulgar M, McGlone F, Bowsher D, Miles JB. Comparative effectiveness of different stimulation modes in relieving pain. Part I. A pilot study. *Pain* 1991; 47(2): 151-5.
- 19  
20 362. Tulgar M, McGlone F, Bowsher D, Miles JB. Comparative effectiveness of different stimulation modes in relieving pain. Part II. A double-blind controlled long-term clinical trial. *Pain* 1991; 47(2): 157-62.
- 21  
22 363. Unterrainer AF, Friedrich C, Krenn MH, Piotrowski WP, Golaszewski SM, Hitzl W. Postoperative and preincisional electrical nerve stimulation TENS reduce postoperative opioid requirement after major spinal surgery. *Journal of neurosurgical anesthesiology* 2010; 22(1): 1-5.
- 23  
24 364. Unterrainer AF, Uebles FX, Gross FA, Werner GG, Krombholz MA, Hitzl W. TENS compared to opioids in postoperative analgesic therapy after major spinal surgery with regard to cognitive function. *Middle east journal of anaesthesiology* 2012; 21(6): 815-21.
- 25  
26 365. Upton GA, Tinley P, Al-Aubaidy H, Crawford R. The influence of transcutaneous electrical nerve stimulation parameters on the level of pain perceived by participants with painful diabetic neuropathy: A crossover study. *Diabetes & metabolic syndrome* 2017; 11(2): 113-8.
- 27  
28 366. Vaidya SM. Sacroiliac joint mobilisation versus transcutaneous electrical nerve stimulation for pregnancy induced posterior pelvic pain-a randomised clinical trial. *Journal of Clinical and Diagnostic Research* 2018; 12(1): YC04-YC7.
- 29  
30 367. Vaillancourt S, Coulombe-Lévêque A, Fradette J, et al. Combining transcutaneous electrical nerve stimulation with therapeutic exercise to reduce pain in an elderly population: a pilot study. *Disability and rehabilitation* 2019: 1-8.
- 31  
32 368. Valenza MC, Torres-Sanchez I, Cabrera-Martos I, Valenza-Demet G, Cano-Cappellacci M. Acute Effects of Contract-Relax Stretching vs. TENS in Young Subjects With Anterior Knee Pain: A Randomized Controlled Trial. *Journal of strength and conditioning research* 2016; 30(8): 2271-8.
- 33  
34 369. van der Ploeg JM, Vervest HA, Liem AL, Schagen van Leeuwen JH. Transcutaneous nerve stimulation (TENS) during the first stage of labour: a randomized clinical trial. *Pain* 1996; 68(1): 75-8.
- 35  
36 370. van der Spank JT, Cambier DC, De\_Paepe HM, Danneels LA, Witvrouw EE, Beerens L. Pain relief in labour by transcutaneous electrical nerve stimulation (TENS). *Archives of gynecology and obstetrics* 2000; 264(3): 131-6.
- 37  
38 371. Vance CG, Rakel BA, Blodgett NP, et al. Effects of transcutaneous electrical nerve stimulation on pain, pain sensitivity, and function in people with knee osteoarthritis: a randomized controlled trial. *Physical therapy* 2012; 92(7): 898-910.
- 39  
40 372. Vitalii C, Oleg P. The efficiency of transcutaneous electrical nerve stimulation in association with gabapentin in the treatment of neuropathic pain in patients with spinal cord injury. *Romanian Journal of Neurology/ Revista Romana de Neurologie* 2014; 13(4): 193-6.
- 41  
42 373. Vrouva S, Batistaki C, Paraskevaidou E, et al. Comparative study of pain relief in two non-pharmacological treatments in patients with partial rotator cuff tears: A randomized trial. *Anesthesiology and Pain Medicine* 2019; 9(2).
- 43  
44 374. Walker RH, Morris BA, Angulo DL, Schneider J, Colwell CW, Jr. Postoperative use of continuous passive motion, transcutaneous electrical nerve stimulation, and continuous cooling pad following total knee arthroplasty. *The Journal of arthroplasty* 1991; 6(2): 151-6.
- 45  
46



08\_OL-TABLE1\_IncludedStudies

- 1  
2 375. Wang SF, Lee JP, Hwa HL. Effect of transcutaneous electrical nerve stimulation on primary dysmenorrhea. *Neuromodulation* 2009; 12(4): 302-9.
- 3 376. Warfield CA, Stein JM, Frank HA. The effect of transcutaneous electrical nerve stimulation on pain after thoracotomy. *The Annals of thoracic surgery* 1985; 39(5): 462-5.
- 4 377. Warke K, Al-Smadi J, Baxter GD, Walsh DM, Lowe-Strong AS. A double blind, placebo controlled, randomised, clinical trial investigating the efficacy of transcutaneous electrical  
5 nerve stimulation for low back pain in a multiple sclerosis population. *Multiple Sclerosis* 2004; 10(7032): S107-S.
- 6 378. Warke K, Al-Smadi J, Baxter D, Walsh D, Lowe-Strong A. Efficacy of transcutaneous electrical nerve stimulation (tens) for chronic low-back pain in a multiple sclerosis population:  
7 a randomized, placebo-controlled clinical trial. *Clinical Journal of Pain* 2006; 22(9): 812-9.
- 8 379. Yameen F, Shahbaz NN, Hasan Y, Fauz R, Abdullah M. Efficacy of transcutaneous electrical nerve stimulation and its different modes in patients with trigeminal neuralgia. *JPMA*  
9 *The Journal of the Pakistan Medical Association* 2011; 61(5): 437-9.
- 10 380. Yesil H, Hepguler S, Dundar U, Taravati S, Isleten B. Does the Use of Electrotherapies Increase the Effectiveness of Neck Stabilization Exercises for Improving Pain, Disability,  
11 Mood, and Quality of Life in Chronic Neck Pain?: A Randomized, Controlled, Single-Blind Study. *Spine* 2018; 43(20): E1174-e83.
- 12 381. Yilmaz M, Tarakci D, Tarakci E. Comparison of high-intensity laser therapy and combination of ultrasound treatment and transcutaneous nerve stimulation on cervical pain associated  
13 with cervical disc herniation: A randomized trial. *Complementary therapies in medicine* 2020; 49: 102295.
- 14 382. Yilmazer M, Kose S, Ario DT, Koken G, Ozbulut O. Efficacy of transcutaneous electrical nerve stimulation for pain relief in women undergoing office endometrial biopsy. *Archives*  
15 *of gynecology and obstetrics* 2012; 285(4): 1059-64.
- 16 383. Yokoyama M, Sun X, Oku S, et al. Comparison of percutaneous electrical nerve stimulation with transcutaneous electrical nerve stimulation for long-term pain relief in patients with  
17 chronic low back pain. *Anesthesia and Analgesia* 2004; 98(6): 1552-6.
- 18 384. Yoshimizu M, Teo AR, Ando M, Kiyohara K, Kawamura T. Relief of chronic shoulder and neck pain by electro-acupuncture and transcutaneous electrical nervous stimulation: A  
19 randomized crossover trial. *Medical Acupuncture* 2012; 24(2): 97-103.
- 20 385. Yüksel M, Ayaş Ş, Cabioglu MT, Yilmaz D, Cabioglu C. Quantitative Data for Transcutaneous Electrical Nerve Stimulation and Acupuncture Effectiveness in Treatment of  
21 Fibromyalgia Syndrome. *Evidence-based Complementary and Alternative Medicine* 2019; 2019.
- 22 386. Yurtkuran M, Kocagil T. TENS, electroacupuncture and ice massage: comparison of treatment for osteoarthritis of the knee. *American Journal of Acupuncture* 1999; 27(3-4): 133-40.
- 23 387. Zakariaee SS, Shahoei R, Nosab LH, Moradi G, Farshbaf M. The Effects of Transcutaneous Electrical Nerve Stimulation on Post-Episiotomy Pain Severity in Primiparous Women: A  
24 Randomized, Controlled, Placebo Clinical Trial. *Galen Medical Journal* 2019; 8: UNSP e1404.
- 25 388. Zhang Y, Zhang J, Wang L, Wang K, Svensson P. Effect of transcutaneous electrical nerve stimulation on jaw movement-evoked pain in patients with TMJ disc displacement without  
26 reduction and healthy controls. *Acta Odontologica Scandinavica* 2020; 78(4): 309-20.
- 27 389. Zhou MM, Li F, Lu WB, Wu JF, Pei S. Efficiency of Neuromuscular Electrical Stimulation and Transcutaneous Nerve Stimulation on Hemiplegic Shoulder Pain: A Randomized  
28 Controlled Trial. *Archives of Physical Medicine and Rehabilitation* 2018; 99(9): 1730-9.
- 29  
30  
31  
32  
33  
34  
35  
36  
37  
38  
39  
40  
41  
42  
43  
44  
45  
46

09\_OL-TABLE2\_AwaitingClassification

**Online Table 2****Records Awaiting Classification**

| Reference                                 | Language     | Reason             |
|-------------------------------------------|--------------|--------------------|
| Aiyejusunle et al. 2007 <sup>1</sup>      | Not reported | Need to obtain PDF |
| Chen et al. 2007 <sup>2</sup>             | Chinese      | Needs translation  |
| Houshyar et al. 2015 <sup>3</sup>         | Persian      | Needs translation  |
| Kim et al. 2020 <sup>4</sup>              | Not reported | Need to obtain PDF |
| Kumar and Rahim 2019 <sup>5</sup>         | Not reported | Need to obtain PDF |
| Mehlhorn et al. 2005 <sup>6</sup>         | German       | Needs translation  |
| Pourmomeny et al. 2009 <sup>7</sup>       | Persian      | Needs translation  |
| Renklitepe et al. 1995 <sup>8</sup>       | Not reported | Need to obtain PDF |
| Sakai et al. 2001 <sup>9</sup>            | Japanese     | Needs translation  |
| Tokuda et al. 2013 <sup>10</sup>          | Japanese     | Needs translation  |
| Tunc et al. 2002 <sup>11</sup>            | Not reported | Need to obtain PDF |
| van der Pierjil et al. 1998 <sup>12</sup> | Not reported | Needs translation  |
| Wang et al. 2005 <sup>13</sup>            | Not reported | Need to obtain PDF |
| Xiao et al. 2002 <sup>14</sup>            | Not reported | Need to obtain PDF |
| Zati et al. 2004 <sup>15</sup>            | Italian      | Needs translation  |
| Zheng et al., 2011 <sup>16</sup>          | Chinese      | Needs translation  |
| Zhang et al. 2014 <sup>17</sup>           | Chinese      | Needs translation  |
| Zhong and Zhang 2017 <sup>18</sup>        | Not reported | Need to obtain PDF |
| Zhou et al. 2009 <sup>19</sup>            | Not reported | Need to obtain PDF |

**REFERENCES – STUDIES AWAITING CLASSIFICATION\***

\*Note: Reference numbering in this list relates only to studies cited in this table

1. Aiyejusunle CB, Kola-Korolo TA, Ajiboye OA. Comparison of the effects of TENS and sodium salicylate iontophoresis in the management of osteoarthritis of the knee. *Nigerian Quarterly Journal of Hospital Medicine* 2007; 17(1): 30-4.
2. Chen L, Zhang XL, Ding H, Tao YQ, Zhan HS. Comparative study on effects of manipulation treatment and transcutaneous electrical nerve stimulation on patients with cervicogenic headache. [Chinese]. *Journal of Chinese Integrative Medicine* 2007; 5(4): 403-6.
3. Houshyar AE, Rezaie HH, Jahani Y, Kazemi M, Monfared S. Comparison of two methods of aromatherapy with lavender essence and Transcutaneous Electrical Nerve Stimulation (TENS) on cesarean postoperative pain. [Persian]. *Iranian Journal of Obstetrics, Gynecology and Infertility* 2015; 18(146): 6-12.
4. Kim B, Lohman E, Yim J. Acupuncture-like Transcutaneous Electrical Nerve Stimulation for Pain, Function, and Biochemical Inflammation After Total Knee Arthroplasty. *Alternative Therapies in Health and Medicine* 2020. [Volume, issue and pages not provided]
5. Kumar SS, Abdul Rahim A. A study on effectiveness of conventional mode TENS on trismus. *Research Journal of Pharmacy and Technology* 2019; 12(3): 1193-6.
6. Mehlhorn G, Beckmann M, Schild R, Binder HJGuF. Analgesie von schmerzhaften Nachwehen mittels transkutaner elektrischer Nervenstimulation (TENS) vs. Metamizol. 2005; 65(03): 266-71.
7. Pourmomeny AA, Amini M, Safaei H, Hassanzadeh A. The effect of electroanalgesia on pain relief in patient with diabetic neuropathy type II. [Arabic]. *Iranian Journal of Endocrinology and Metabolism* 2009; 11(4): 363-472.
8. Renklitepe N, Dogan N, Kayhan O, Ozaras N. Effects of different TENS electrode types in degenerative joint disease of the hands. [Turkish]. *Fizik Tedavi Rehabilitasyon Dergisi* 1995; 19(4): 204-8.

09\_OL-TABLE2\_AwaitingClassification

- 1
  - 2
  - 3
  - 4
  - 5
  - 6
  - 7
  - 8
  - 9
  - 10
  - 11
  - 12
  - 13
  - 14
  - 15
  - 16
  - 17
  - 18
  - 19
  - 20
  - 21
  - 22
  - 23
  - 24
  - 25
  - 26
  - 27
  - 28
  - 29
  - 30
  - 31
  - 32
  - 33
  - 34
  - 35
  - 36
  - 37
  - 38
  - 39
  - 40
  - 41
  - 42
  - 43
  - 44
  - 45
  - 46
  - 47
  - 48
  - 49
  - 50
  - 51
  - 52
  - 53
  - 54
  - 55
  - 56
  - 57
  - 58
  - 59
  - 60
9. Sakai T, Tsutani K, Tsukayama H. (Multi center randomized controlled trial of acupuncture with electric stimulation and acupuncture-like transcutaneous electrical nerve stimulation for lumbago) [Japanese]. *Zen Nippon Shinkyu Gagai Zasshi [Journal of Japan Society of Acupuncture and Moxibustion]* 2001; 51(2): 175-184.
10. Tokuda M, Tabira K, Masuda T, Nishiwada T, Shomoto K. Effect of Transcutaneous Electrical Nerve Stimulation after Abdominal Surgery-A Randomized Controlled Trial. *Rigakuryoho Kagaku* 2013; 28(4): 415-21.
11. Tunc M, Gunal H, Bilgili T, Ulus F, Tunc H, Savkiloglu E. The effect of TENS on epidural patient controlled analgesia with tramadol for postthoracotomy pain relief. [Turkish]. *Turk Anesteziyoloji ve Reanimasyon* 2002; 30(7): 315-21.
12. van dPI, Smits A, Verwer J. Elektrodeplaatsing bij TENS: een pilot-studie. *Nederlands Tijdschrift fur Fysiotherapie* 1998; 108(5): 128-31.
13. Wang N XB, Wei X, Li M, Xu Y. A clinical controlled study of immediate analgesia effect of TENS on post-operative pain after total knee replacement. *Chinese Journal of Rehabilitation Medicine* 2005; 20: 188-90.
14. Xiao H, She SZ, Xu LX. (Effects of transcutaneous electric nerve stimulation on the postoperative analgesia with PCEA and recovery after surgery) [Chinese - simplified characters]. *Zhongguo Linchuang Kangfu [Chinese Journal of Clinical Rehabilitation]* 2002; 6(12):1784-1785.
15. Zati A, Fortuna D, Valent A, Pulvirenti F, Bilotta TW. Treatment of low back pain caused by intervertebral disk displacement: comparison between high power laser, TENS and NSAIDs. *Medicina Dello Sport* 2004; 57(1): 77-82.
16. Zheng G, Huang X, Zhao X. Influence of neuromuscular electrical stimulation of muscoli quadriceps femoris on motor function rehabilitation after total knee replacement; 2011; 26: 1126-1130.
17. Zhang Q, Zhang JH, Tong PJ. [Application of transcutaneous electrical nerve stimulation to multimodal analgesia after total knee arthroplasty]. *Zhongguo Gu Shang [China Journal of Orthopaedics and Traumatology]* 2014; 27(4): 283-6.
18. Zhong J, Zhang L. [Transcutaneous electrical acupoint stimulation for pregnancy of in vitro fertilization-embryo transfer]. *Zhongguo Zhen Jiu [Chinese Acupuncture & Moxibustion]* 2017; 37(3): 253-5.
19. Zhou GY, Zhou GS, Jian-hong J. Clinical observation on transcutaneous electrical acupoint stimulation for treatment of functional dyspepsia. [Chinese]. *Zhongguo Zhen Jiu [Chinese Acupuncture & Moxibustion]* 2009; 29(6): 436-40.

10\_OL-TABLE3\_ExcludedStudies

## ONLINE TABLE 3

## Excluded studies, with reasons, based on screening full text records

| Reference                                   | Reason for exclusion                                                                             | Description of study                                                                                                                                                                                                                                                                                                                                                                                                                                            |
|---------------------------------------------|--------------------------------------------------------------------------------------------------|-----------------------------------------------------------------------------------------------------------------------------------------------------------------------------------------------------------------------------------------------------------------------------------------------------------------------------------------------------------------------------------------------------------------------------------------------------------------|
| Aguilar Ferrandiz et al., 2016 <sup>1</sup> | Not standard TENS - auto-targeted neurostimulation                                               | Evaluated Nervomatrix Soleve® auto-targeted neurostimulation device providing TENS-stimulation and mechanical pressure for chronic low back pain. Technical specifications differ from a standard TENS device                                                                                                                                                                                                                                                   |
| Albayrak, 2017 <sup>2</sup>                 | Not an RCT                                                                                       | Evaluated TENS on persistent post-surgical pain after total knee arthroplasty. Retrospective study of prospectively collected data                                                                                                                                                                                                                                                                                                                              |
| Alhusaini et al., 2019 <sup>3</sup>         | No pain outcomes – Primary outcomes grip strength and function; secondary outcome manual ability | Evaluated TENS combined with therapeutic exercises for hand function by reducing spasticity in children with hemiplegic cerebral palsy                                                                                                                                                                                                                                                                                                                          |
| Altas et al., 2019 <sup>4</sup>             | Not possible to isolate TENS                                                                     | Evaluated the effect of physical therapy modalities on pain, sleep, mental status, and quality of life of patients with osteoarthritis.                                                                                                                                                                                                                                                                                                                         |
| Al Zamil et al., 2019 <sup>5</sup>          | Not full report - Abstract of conference presentation                                            | Evaluated TENS of median nerves and acupuncture in the treatment of carpal tunnel syndrome                                                                                                                                                                                                                                                                                                                                                                      |
| Askin et al., 2014 <sup>6</sup>             | Not possible to isolate effect of TENS                                                           | Evaluated ultrasound therapy for stellate ganglion blockade in complex regional pain syndrome type I. TENS delivered in combination with drug medication, contrast bath and exercise to all groups.                                                                                                                                                                                                                                                             |
| Atalay et al., 2009 <sup>7</sup>            | No pain outcomes                                                                                 | Evaluated TENS for viability of skin flaps created during mastectomy in breast cancer patients. No pain outcomes                                                                                                                                                                                                                                                                                                                                                |
| Augustinsson et al., 1977 <sup>8</sup>      | Not an RCT                                                                                       | Evaluated TENS for pain during delivery labour pain). Open label pre-post study single group study without comparison intervention(s)                                                                                                                                                                                                                                                                                                                           |
| Avramidis et al., 2003 <sup>9</sup>         | Not standard TENS – neuromuscular electrical stimulation                                         | Evaluated electric muscle stimulation during rehabilitation after total knee arthroplasty - MicroStim 2-channel (MS-2) neuromuscular stimulator                                                                                                                                                                                                                                                                                                                 |
| Aydın et al., 2015 <sup>10</sup>            | TENS administered internally - intravaginal                                                      | Evaluated vaginal electrical stimulation for sexual function using the insertion of a vaginal probe inserted delivering medium-frequency (50 Hz) alternating current (duty cycle 5 seconds on followed by 5 seconds off) generated by a MyoBravo electro stimulation instrument (MTR+ Vertiebs GmbH, Berlin)                                                                                                                                                    |
| Aydogan et al., 2014 <sup>11</sup>          | Not standard TENS - Frequency Rhythmic Electrical Modulation System                              | Evaluated pre-emptive frequency rhythmic electrical modulation using a Phyback device (PBK2C) in patients undergoing lumbar stabilization                                                                                                                                                                                                                                                                                                                       |
| Ayyildiz et al. 2004 <sup>12</sup>          | Not an RCT                                                                                       | Evaluated TENS for pain associated with extracorporeal short-wave lithotripsy. Open label pre-post study single group study without comparison intervention(s).                                                                                                                                                                                                                                                                                                 |
| Bai et al., 2018 <sup>13</sup>              | Not standard TENS - transcutaneous electric acupoint stimulation                                 | Evaluated transcutaneous electric acupoint stimulation (TEAS) on stress response during extubation after general anaesthesia in patients undergoing elective supratentorial craniotomy. Primary purpose of TEAS was not to treat pain. TEAS was administered using a Hwato electronic acupuncture treatment instrument (model no.: SDZ-II) delivering an alternate dense- disperse frequency of 2/10 Hz (2 Hz for 10 s and 10 Hz) to various acupuncture points |
| Behm et al., 2019 <sup>14</sup>             | Not pain outcomes - Fatigue rather than pain                                                     | Evaluated if TENS-induced pain suppression would augment force output during a fatiguing protocol in the treated and contralateral muscles.                                                                                                                                                                                                                                                                                                                     |
| Belmonte et al., 2012 <sup>15</sup>         | Not standard TENS - microcurrent electrical stimulation and bioresonance device                  | Evaluated low-frequency low-intensity electrotherapy in the treatment of chronic upper limb breast cancer-related lymphoedema. Used a Flowwave2Home device delivering microcurrents via a wave of carrier frequency ranging from 0.31 to 6.16 Hz and a modulation between 400 and 2120 Hz; the low offset voltage is always between +12 and -12 V.                                                                                                              |
| Bouafif and Ellouze, 2019 <sup>16</sup>     | Not an RCT                                                                                       | Evaluated modulated PWM-TENS for non-cancer pain. PWM-TENS used sinusoidal waves sinusoidal carrier whose frequency varies according to the mode of stimulation. There was a comparison with 'classical TENS' but this was not a RCT.                                                                                                                                                                                                                           |
| Bundsen et al., 1981 <sup>17</sup>          | Not an RCT                                                                                       | Evaluated TENS for labour pain. Retrospective (stated as prospective in title) open label questionnaire with each patient matched with a control without randomisation.                                                                                                                                                                                                                                                                                         |
| Burch et al., 2008 <sup>18</sup>            | Not standard TENS - low-current TENS (0.5mA used as control)                                     | Evaluated combination of interferential and patterned muscle stimulation for osteoarthritis of knee. Control group received low-current TENS biphasic square wave with a 0.2 Hz frequency and a fixed amplitude of 60 mA, with pulse width adjusted to provide a net output of 73 nC and delivered across 300 microseconds equivalent to a peak output of 0.5 mA. This did not meet our criteria for standard TENS                                              |
| Burssens et al., 2003 <sup>19</sup>         | No pain outcomes                                                                                 | Evaluated burst TENS on the healing of Achilles tendon suture                                                                                                                                                                                                                                                                                                                                                                                                   |
| Carbonario et al., 2013 <sup>20</sup>       | Not an RCT                                                                                       | Evaluated TENS for tender points in fibromyalgia. Patients were allocated 'sequentially' and there was no mention of randomisation within the report (quasi-RCT). This was included in the Cochrane review on Fibromyalgia.                                                                                                                                                                                                                                     |

10\_OL-TABLE3\_ExcludedStudies

| Reference                               | Reason for exclusion                                                                                       | Description of study                                                                                                                                                                                                                                                                                                                                                                                               |
|-----------------------------------------|------------------------------------------------------------------------------------------------------------|--------------------------------------------------------------------------------------------------------------------------------------------------------------------------------------------------------------------------------------------------------------------------------------------------------------------------------------------------------------------------------------------------------------------|
| Chao et al., 2007 <sup>21</sup>         | TENS delivered to acupuncture points distant to pain                                                       | Evaluated TENS on acupuncture points for pain during the first stage of labour using two pairs of electrodes placed at bilateral Li 4 (Hegu) points (midpoint between first and second carpal bones, first web space dorsal side) and Sp6 (Sanyinjiao) points (5 cm above medial malleolus in lower leg)                                                                                                           |
| Chee and Walton 1986 <sup>22</sup>      | Not standard TENS - microcurrent electrical stimulation                                                    | Evaluated treatment of trigger points with micro amperage TENS using an Electro-acuscope 80 stimulator                                                                                                                                                                                                                                                                                                             |
| Cheing and Hui-Chan, 2004 <sup>23</sup> | No pain outcomes                                                                                           | Evaluated addition of TENS to exercise training for knee osteoarthritis but measured functional outcomes only. There were no pain outcomes in report                                                                                                                                                                                                                                                               |
| Chen et al., 2013 <sup>24</sup>         | Not standard TENS electrodes                                                                               | Evaluated TENS for knee osteoarthritis using silver spike point electrodes, similar to IFT suction cups, rather than self-adhering carbon-rubber TENS electrodes                                                                                                                                                                                                                                                   |
| Chen et al. 2013 <sup>25</sup>          | TENS on acupuncture points using TEAS                                                                      | Evaluated electroacupuncture, TENS and acupoint massage on peri-arthritis of shoulder.                                                                                                                                                                                                                                                                                                                             |
| Chen et al., 2015 <sup>26</sup>         | Not standard TENS - transcutaneous electric acupoint stimulation                                           | Evaluated transcutaneous electric acupoint stimulation on post-procedural abdominal pain after colonoscopy at Jiaji (EX-B2) points were located on both sides of the spinous column using a Han's Acupoint Nerve Stimulator (HANS-200A, Nanjing Jisheng Medical Technology Co., Ltd., Nanjing, China), delivering a dense-and-disperse frequency at 2/100 Hz for 30 min prior to induction.                        |
| Chen et al., 2015 <sup>27</sup>         | Not standard TENS - transcutaneous electric acupoint stimulation                                           | Evaluated transcutaneous electric acupoint stimulation for remifentanyl-induced hyperalgesia in patients undergoing thyroidectomy and delivered as 30 min of stimulation (6-9 mA, 2/10 Hz) on the Hegu (LI4) and Neiguan (PC6) before anaesthesia (pre-emptive) and terminated before the end of surgery. Stimulation was not at site of pain or over nerve bundles.                                               |
| Chen et al., 2015 <sup>28</sup>         | Not standard TENS - transcutaneous electric acupoint stimulation                                           | Evaluated transcutaneous electric acupoint stimulation on postoperative quality of recovery after thyroidectomy with general anaesthesia administered at bilateral Hegu (LI4) and Neiguan (PC6) before induction of anaesthesia (pre-emptive). TEAS was delivered at a disperse-dense frequency of 2/10 Hz and an intensity of 6-9 mA for 30 min using the Hans electronic acupuncture apparatus (HANS-100A)       |
| Chen et al., 2020 <sup>29</sup>         | Not Standard TENS -TEAS                                                                                    | Evaluated efficacy of TEAS for sedation and postoperative analgesia in lung cancer patients undergoing thoracoscopic pulmonary resection.                                                                                                                                                                                                                                                                          |
| Cheng and Pomeranz, 1986 <sup>30</sup>  | Not standard TENS - Codetron                                                                               | Evaluated 'acupuncture-like stimulation' using a Codetron device for chronic musculoskeletal pain and delivering currents randomly to acupuncture points at different locations on the body via seven electrodes.                                                                                                                                                                                                  |
| Chiu et al., 1999 <sup>31</sup>         | TENS delivered to acupuncture points distant to pain                                                       | Evaluated TENS for pain during hemorrhoidectomy. Electrodes were positioned on acupuncture points distant to the painful area (i.e. dorsal web between the first and the second metacarpal bones (Hegu, Large Intestine meridian, 4th ampoin, negative electrode) and on radial side 3 cm proximal to the wrist crease (Lieque, Lung meridian, 7th ampoin, positive electrode) using a Han Acutens, WQ1002F device |
| Coletta et al., 1988 <sup>32</sup>      | Unable to isolate TENS effects                                                                             | Evaluated TENS vs. TENS + ointment containing Etofenamate. Not possible to isolate effects of TENS                                                                                                                                                                                                                                                                                                                 |
| Conn et al., 1986 <sup>33</sup>         | Some participants not adults                                                                               | Evaluated TENS for pain following appendicectomy. Included children (minimum age = 13 years (TENS), 15 (sham) and 13 (control))                                                                                                                                                                                                                                                                                    |
| Cornell et al., 1984 <sup>34</sup>      | Not an RCT                                                                                                 | Evaluated TENS for pain following foot surgery. Data gathered prospectively during TENS was compared with retrospective data of patients that did not receive TENS harvested from medical records                                                                                                                                                                                                                  |
| Demidas et al., 2019 <sup>35</sup>      | Healthy humans                                                                                             | Evaluated touch and pain sensations and the correlation between them in diadynamic current and TENS                                                                                                                                                                                                                                                                                                                |
| Duzyj et al., 2020 <sup>36</sup>        | Not full report – Abstract of conference poster presentation                                               | Evaluated effect of TENS therapy in the pain management of women after caesarean delivery.                                                                                                                                                                                                                                                                                                                         |
| Dodick et al., 2015 <sup>37</sup>       | Not standard TENS - invasive technique                                                                     | Evaluated peripheral nerve stimulation (PNS) of the occipital nerves for managing chronic migraine using implanted with a neurostimulation system Not TENS                                                                                                                                                                                                                                                         |
| Eidy et al., 2016 <sup>38</sup>         | TENS given pre-emptive to general anaesthesia / surgery - pain measured after surgery with no TENS post op | Evaluated effects of preoperative TENS on post inguinal hernia repair pain                                                                                                                                                                                                                                                                                                                                         |
| Ertzgaard et al., 2018 <sup>39</sup>    | Not standard TENS electrodes                                                                               | Evaluation of TENS for spasticity using an AT Mollii® electrotherapy system consisting of a two-piece garment equipped with 58 electrodes and a control unit.                                                                                                                                                                                                                                                      |
| Fagade and Obilade, 2003 <sup>40</sup>  | No pain outcomes                                                                                           | Evaluated TENS on post-IMF trismus and pain in Nigerian Patients. No pain outcomes                                                                                                                                                                                                                                                                                                                                 |



10\_OL-TABLE3\_ExcludedStudies

| Reference                                 | Reason for exclusion                                                                                                                                                                                                                                                                           | Description of study                                                                                                                                                                                                                                                                                                                                                                                                                                                                                                                                                                                                                                                                                                                                                                                                                            |
|-------------------------------------------|------------------------------------------------------------------------------------------------------------------------------------------------------------------------------------------------------------------------------------------------------------------------------------------------|-------------------------------------------------------------------------------------------------------------------------------------------------------------------------------------------------------------------------------------------------------------------------------------------------------------------------------------------------------------------------------------------------------------------------------------------------------------------------------------------------------------------------------------------------------------------------------------------------------------------------------------------------------------------------------------------------------------------------------------------------------------------------------------------------------------------------------------------------|
| Fargas-Babjak et al., 1989 <sup>41</sup>  | Not standard TENS – Codetron                                                                                                                                                                                                                                                                   | Evaluated ‘acupuncture-like stimulation’ for osteoarthritis of the hip or knee using a Codetron device                                                                                                                                                                                                                                                                                                                                                                                                                                                                                                                                                                                                                                                                                                                                          |
| Fargas-Babjak et al., 1992 <sup>42</sup>  | Not standard TENS – Codetron                                                                                                                                                                                                                                                                   | Evaluated ‘acupuncture-like stimulation’ for chronic pain syndrome or osteoarthritis using a Codetron device                                                                                                                                                                                                                                                                                                                                                                                                                                                                                                                                                                                                                                                                                                                                    |
| Fary et al., 2011 <sup>43</sup>           | Not standard TENS - subsensory pulsed electrical stimulation                                                                                                                                                                                                                                   | Evaluated pulsed electrical stimulation for osteoarthritis of the knee using a commercially available TENS stimulator (Metron Digi-10s) that was modified by a biomedical engineer to deliver pulsed, asymmetrically biphasic, exponentially decreasing waveform currents with a frequency of 100 Hz and pulse width of 4 msec. Author’s state “ <i>Participants attached the device and turned the intensity up until they could feel pins and needles or a prickling sensation under one or both electrodes. After achieving sensory output, participants were instructed to turn the intensity down until they could no longer feel any electrical stimulation. At this stage, a built-in locking mechanism was engaged that prevented subsequent adjustment of intensity without restarting the device.</i> ” Thus, subsensory stimulation. |
| Fletcher-Smith et al., 2019 <sup>44</sup> | Not standard TENS - Neuromuscular Electrical Stimulation “... current intensity was increased to produce an alternating contraction of the flexors and extensors using a flex-hold-extend-hold pattern, ensuring that a pure movement was produced with no/minimal ulnar or radial deviation.” | Evaluated feasibility of initiating electrical stimulation treatment of wrist extensors and flexors in patients early after stroke to prevent muscle contractures and pain.                                                                                                                                                                                                                                                                                                                                                                                                                                                                                                                                                                                                                                                                     |
| Gadsby et al., 1997 <sup>45</sup>         | TENS delivered to acupuncture points distant to pain                                                                                                                                                                                                                                           | Evaluated acupuncture-like TENS within palliative care delivered to acupuncture points PC6 (Neiguan) and LI4 (Hegu) of the dominant hand                                                                                                                                                                                                                                                                                                                                                                                                                                                                                                                                                                                                                                                                                                        |
| Gao et al., 2017 <sup>46</sup>            | Not standard TENS - transcutaneous electric acupoint stimulation                                                                                                                                                                                                                               | Evaluated transcutaneous electric acupoint stimulation for procedural pain during and post thyroidectomy administered at PC6 (Neiguan) and LI4 (Hegu) and distant from the painful site. Full article in Chinese.                                                                                                                                                                                                                                                                                                                                                                                                                                                                                                                                                                                                                               |
| Garaud et al., 2018 <sup>47</sup>         | Cannot isolate effects of TENS                                                                                                                                                                                                                                                                 | Evaluated efficacy of TENS in the treatment LBP when associated to a therapeutic education program (TEP).                                                                                                                                                                                                                                                                                                                                                                                                                                                                                                                                                                                                                                                                                                                                       |
| Garland et al., 2007 <sup>48</sup>        | Not standard TENS - highly optimized, capacitively coupled, pulsed electrical stimulator                                                                                                                                                                                                       | Evaluated highly optimized, capacitively coupled, pulsed electrical stimulator for osteoarthritis of the knee using a knee garment with flexible, embedded electrodes and a small battery-operated generator that produced a 100-Hz, negative pulsed signal (BioniCare Medical Technologies, Inc., Sparks, Maryland). Authors state - “ <i>They then turned on the device, increased the signal amplitude to between 0 and 12 V by rotating a dial until a tingling sensation was felt over the knee or thigh, and then reducing the amplitude until this sensation disappeared. Thus, active treatment remained imperceptible and indistinguishable from placebo.</i> ” P631 and “In fact, TENS and PES differ in many ways.” P635                                                                                                             |
| Gaul et al., 2016 <sup>49</sup>           | Not standard TENS - invasive vagus nerve stimulation                                                                                                                                                                                                                                           | Evaluated non-invasive vagus nerve stimulation for prevention and acute treatment of chronic cluster headache using “... a low-voltage electrical signal (5-kHz sine wave series that occurred for 1 ms and repeated every 40 ms (25Hz)).” p 535                                                                                                                                                                                                                                                                                                                                                                                                                                                                                                                                                                                                |
| Geirsson et al., 1993 <sup>50</sup>       | Not standard TENS - posterior tibial nerve stimulation                                                                                                                                                                                                                                         | Evaluated TENS of the tibial nerve in patients with interstitial cystitis using electrodes positioned over the tibial nerve on the foot. Thus, TENS delivered distant to symptoms. Posterior tibial nerve stimulation is a neuromodulation technique to treat overactive bladder and associated symptoms. TENS is administered over tibial nerve distant from sensations associated with urinary urgency.                                                                                                                                                                                                                                                                                                                                                                                                                                       |
| Ghonomie et al., 1999c <sup>51</sup>      | Not standard TENS - percutaneous electrical nerve stimulation                                                                                                                                                                                                                                  | Evaluated the effect of stimulus frequency on response to percutaneous electrical nerve stimulation in patients with chronic low back pain delivered via ten, 32-gauge (0.2 mm) stainless steel acupuncture-like needle probes placed into soft tissue and/or muscle in the low back region to a depth of 2–4 cm.                                                                                                                                                                                                                                                                                                                                                                                                                                                                                                                               |
| Gokce et al., 2020 <sup>52</sup>          | Not RCT                                                                                                                                                                                                                                                                                        | Evaluated bilateral transcutaneous tibial nerve stimulation on constipation severity in geriatric patients with refractory chronic constipation.                                                                                                                                                                                                                                                                                                                                                                                                                                                                                                                                                                                                                                                                                                |
| Gottfried et al., 2019 <sup>53</sup>      | Not focussed on pain - Not TENS - abstract                                                                                                                                                                                                                                                     | Evaluated transcutaneous vagal nerve stimulation improves symptoms, pain, and gastric emptying in patients with idiopathic gastroparesis.                                                                                                                                                                                                                                                                                                                                                                                                                                                                                                                                                                                                                                                                                                       |
| Govil et al., 2020 <sup>54</sup>          | Not RCT                                                                                                                                                                                                                                                                                        | Evaluated extent to which genetic variability modifies Transcutaneous Electrical Nerve Stimulation (TENS) effectiveness in osteoarthritic knee pain                                                                                                                                                                                                                                                                                                                                                                                                                                                                                                                                                                                                                                                                                             |
| Gu et al., 2019 <sup>55</sup>             | Not standard TENS - TEAS                                                                                                                                                                                                                                                                       | Evaluated effects of TEAS on gastrointestinal function recovery after laparoscopic radical gastrectomy                                                                                                                                                                                                                                                                                                                                                                                                                                                                                                                                                                                                                                                                                                                                          |
| Gorodetskiy et al., 2007 <sup>56</sup>    | Not standard TENS - non-invasive interactive neurostimulation (InterX)                                                                                                                                                                                                                         | Evaluated non-invasive interactive neurostimulation in the post-operative recovery of patients with a trochanteric fracture of the femur. Currents delivered using a handheld, non-invasive, interactive neurostimulation device (InterX 5000; Neuro Resource Group, Plano, Texas) device that “ ... generates a high peak amplitude averaging 17 volts on the skin with a low current of about 6 mA, and damped biphasic electrical impulses which are delivered to the tissue through a pair of concentric electrodes placed in direct contact with the target area. The device is able to adjust its strength and damping of the biphasic stimulus changes in accordance with the impedance of the underlying tissue (Fig. 1), resulting in a highly sensitive and variable voltage in order to maintain constant peak current.”             |



10\_OL-TABLE3\_ExcludedStudies

| Reference                                   | Reason for exclusion                                                               | Description of study                                                                                                                                                                                                                                                                                                                                                                                                                                                                                                        |
|---------------------------------------------|------------------------------------------------------------------------------------|-----------------------------------------------------------------------------------------------------------------------------------------------------------------------------------------------------------------------------------------------------------------------------------------------------------------------------------------------------------------------------------------------------------------------------------------------------------------------------------------------------------------------------|
| Harrison et al., 1987 <sup>57</sup>         | Not an RCT – May also be using part of sample in Harrison 1986                     | Evaluated TENS for labour pain. Patient self-selected treatment – not random allocation/RCT “All patients were informed about the methods of analgesia available, including TENS. They were asked if they had decided upon a specific form of analgesia and what it was. Information regarding the trial and its aims was then given to all potential participants and those giving informed consent were enrolled in their specific group of choice.”                                                                      |
| Hedner et al., 1996 <sup>58</sup>           | Not an RCT – narrative review                                                      | This is a narrative overview that describes the RCT by Milson et al., 1994 - included                                                                                                                                                                                                                                                                                                                                                                                                                                       |
| Herman et al., 1994 <sup>59</sup>           | Not standard TENS - Codetron                                                       | Evaluated ‘acupuncture-like stimulation’ using a Codetron device for acute occupational low back pain. Codetron is a neuromodulation technique described as the delivery of acupuncture-like stimulation to six locations on the body in a random order.                                                                                                                                                                                                                                                                    |
| Hettrick et al., 2004 <sup>60</sup>         | No pain outcome – measured itch                                                    | Evaluated the role of TENS for the management of burn-related pruritus                                                                                                                                                                                                                                                                                                                                                                                                                                                      |
| Hsieh et al., 1992 <sup>61</sup>            | Not an RCT – analysis of scales used in an RCT by <sup>62</sup> which was excluded | Evaluated reliability of instruments used in a RCT of transcutaneous muscle stimulation on chronic low back pain. This publication pre-empted publication of RCT by Pope et al., 1994                                                                                                                                                                                                                                                                                                                                       |
| Huang et al., 2017 <sup>63</sup>            | Not standard TENS - transcutaneous electric acupoint stimulation                   | Evaluated transcutaneous electrical acupoint stimulation at different frequencies on perioperative anaesthetic dosage, recovery, complications, and prognosis in video-assisted thoracic surgical lobectomy delivered to acupoints Neiguan (PC6), Hegu (LI4), Lieque (LU7), and Quchi (LI11) distant from pain and using a HANS-200A Acupoint Stimulator and frequency set as 2/100, 2, or 100 Hz in the dense-and-disperse mode before, during and post-surgery                                                            |
| Huang et al., 2018 <sup>64</sup>            | Not standard TENS - transcutaneous electric acupoint stimulation                   | Evaluated transcutaneous electrical acupoint stimulation for recovery after laparoscopic colorectal cancer resection delivered to ST36 (leg) distant to pain before and during surgery                                                                                                                                                                                                                                                                                                                                      |
| Huang et al., 2019 <sup>65</sup>            | Not standard TENS - transcutaneous electrical acupoint stimulation                 | Evaluated transcutaneous electrical acupoint stimulation for pain in patients “in expansion process of skin soft tissue dilator on forehead by water injection applied to acupuncture points at the wrist (PC6), forehead (shangxing) and diwei points. Article in Chinese                                                                                                                                                                                                                                                  |
| Ing et al., 2015 <sup>66</sup>              | Not standard TENS - microampere rather than milliamperere                          | Evaluated TENS for chronic postherpetic neuralgia using electronic neuroadaptive regulation (SCENAR) delivered using a Tennant Biomodulator (TBM) device. The authors state “ <i>The major difference between SCENAR and TBM devices and the traditional TENS units is that the former devices utilize microamps, not the milliamps utilized by the TENS units.</i> ” P477                                                                                                                                                  |
| Issenman et al., 1985 <sup>67</sup>         | Not an RCT                                                                         | Evaluated TENS for pain control after spinal fusion with Harrington rods and assessed ‘hospital charts’ of patients who used TENS with sex and age matched controls. It was described as an evaluation of the effectiveness of their postoperative pain management programme with no statement that this was a prospective study with randomisation                                                                                                                                                                         |
| Itoh et al., 2008 <sup>68</sup>             | Not standard TENS – electrical characteristics are interferential therapy          | Evaluated TENS for osteoarthritis of the knee versus acupuncture or acupuncture combined with TENS or topical poultice. The authors describe this as TENS but inspection of the reported electric characteristics suggest this is IFT “single-channel portable TENS unit (model HVF3000, OMRON Healthcare Co Ltd, Japan), which sends between two electrodes a premixed amplitude-modulated frequency of 122 Hz (beat frequency) generated by two medium frequency sinusoidal waves of 4.0 and 4.122 kHz (feed frequency).” |
| Itoh et al., 2009 <sup>69</sup>             | Not standard TENS – electrical characteristics are interferential therapy          | Evaluated TENS for chronic low back pain versus acupuncture or acupuncture combined with TENS or topical poultice. The authors describe this as TENS but inspection of the reported electric characteristics suggest this is IFT “single-channel portable TENS unit (model HVF3000, OMRON Healthcare Co Ltd, Japan), which sends between two electrodes a premixed amplitude-modulated frequency of 122 Hz (beat frequency) generated by two medium frequency sinusoidal waves of 4.0 and 4.122 kHz (feed frequency).”      |
| Jarden et al., 1999 <sup>70</sup>           | Conference abstract - ? reporting RCT by Jarzem et al., 2005 (included)            | Evaluated conventional transcutaneous electrical nerve stimulation [TENS] with sham therapy using a randomized double-blind crossover design.<br>Transcutaneous electrical nerve stimulation for non-acute low back pain: a randomized double-blind study of conventional, nu-waveform, acupuncture-type and sham therapies.                                                                                                                                                                                                |
| Jeans et al., 1979 <sup>71</sup>            | Not an RCT                                                                         | Evaluated the effect of brief, intense transcutaneous electrical stimulation on chronic pain                                                                                                                                                                                                                                                                                                                                                                                                                                |
| Jiang et al., 2019 <sup>72</sup>            | Not standard TENS - Cefaly                                                         | Evaluated efficacy and safety of combination therapy of flunarizine plus transcutaneous supraorbital neurostimulation (tSNS) compared with either flunarizine or tSNS alone for migraine prophylaxis                                                                                                                                                                                                                                                                                                                        |
| Juarez-Albuixech et al., 2019 <sup>73</sup> | Not RCT                                                                            | Evaluated efficacy of Volta Therapy and transcutaneous electrical nerve stimulation (TENS) in the treatment of lumbosciatica                                                                                                                                                                                                                                                                                                                                                                                                |

10\_OL-TABLE3\_ExcludedStudies

| Reference                           | Reason for exclusion                                                                                                                                         | Description of study                                                                                                                                                                                                                                                                                                                                                                                                                                                                                                                                                                                                       |
|-------------------------------------|--------------------------------------------------------------------------------------------------------------------------------------------------------------|----------------------------------------------------------------------------------------------------------------------------------------------------------------------------------------------------------------------------------------------------------------------------------------------------------------------------------------------------------------------------------------------------------------------------------------------------------------------------------------------------------------------------------------------------------------------------------------------------------------------------|
| Junger et al., 2008 <sup>74</sup>   | Not standard TENS - microcurrent electrical stimulation                                                                                                      | Evaluated Local therapy and treatment costs of chronic, venous leg ulcers treated with electrical stimulation using a Dermapulse device (Gerromed, Hamburg, Germany) delivering currents with varying polarity at a pulse frequency of 128 Hz and an average current strength of 300 microamperes (initially 300 mA, if pain or paraesthesia was noted, it was reduced)                                                                                                                                                                                                                                                    |
| Kaplan et al., 1994 <sup>75</sup>   | Not an RCT                                                                                                                                                   | Evaluated TENS for dysmenorrhea. Open label single group without a comparison group                                                                                                                                                                                                                                                                                                                                                                                                                                                                                                                                        |
| Katz and Melzack 1991 <sup>76</sup> | TENS delivered to acupuncture points distant to pain                                                                                                         | Evaluated low frequency high intensity auricular TENS for phantom limb pain.                                                                                                                                                                                                                                                                                                                                                                                                                                                                                                                                               |
| Kempf et al., 2018 <sup>77</sup>    | Not standard TENS – H wave                                                                                                                                   | Evaluated short-term application of High-Tone Electrical Muscle Stimulation (HTEMS) compared to Transcutaneous Electrical Nerve Stimulation (TENS) with chronic sciatica.                                                                                                                                                                                                                                                                                                                                                                                                                                                  |
| Kho et al., 1991 <sup>78</sup>      | Unable to isolate TENS effects                                                                                                                               | Evaluated transcutaneous stimulation combined with acupuncture for surgery for retroperitoneal lymph node dissection major surgery. Not possible to isolate the effects of TENS from those of acupuncture                                                                                                                                                                                                                                                                                                                                                                                                                  |
| Kocyigit et al., 2012 <sup>79</sup> | Not an RCT – experimental study                                                                                                                              | Evaluated effects of Low-frequency Transcutaneous Electrical Nerve Stimulation on Central Pain Modulation in patients with subacromial impingement syndrome of the shoulder. The experimental paradigm was to evaluate pain-induced activation in the brain during low-frequency TENS application in response to experimentally induced painful stimuli although the nature of the stimuli unclear “ <i>The involved arm of the patient was grasped by the researcher</i> ”                                                                                                                                                |
| Kolen et al., 2012 <sup>80</sup>    | Not standard TENS device or electrodes                                                                                                                       | Evaluated different ways of delivering TENS for osteoarthritis of the knee. Used a prototype TENS device with a matrix electrode array.                                                                                                                                                                                                                                                                                                                                                                                                                                                                                    |
| Kolu et al., 2018 <sup>81</sup>     | Unable to isolate TENS effects                                                                                                                               | Evaluated transcutaneous nerve stimulation combined with high-intensity laser therapy and ultrasound treatment in patients with chronic lumbar radiculopathy. Not possible to isolate TENS                                                                                                                                                                                                                                                                                                                                                                                                                                 |
| Koo et al., 2015 <sup>82</sup>      | Unable to isolate TENS effects                                                                                                                               | Evaluated Noxipoint Therapy to conventional physiotherapy that consisted of TENS, exercise, and manual and heat therapies for the treatment of chronic neck and shoulder. Noxipoint Therapy is a modified technique to deliver TENS over tender muscle points to produce a sore pain and does not meet our criteria for standard TENS and the comparator group included TENS combined with other treatments                                                                                                                                                                                                                |
| Kumar et al., 1997 <sup>83</sup>    | Not standard TENS – H-wave therapy                                                                                                                           | Evaluated transcutaneous electrostimulation for chronic painful peripheral neuropathy. The authors state “Electrotherapy was given by a portable, rechargeable unit, the H-Wave machine (Electronic Waveform Lab, Huntington Beach, CA), which has output parameters that are distinct from the other available transcutaneous electrical nerve stimulation (TENS) modalities.” P 1703 Current is biphasic, exponentially decaying waveform with pulse widths of 4 ms and $\leq 35$ V The electric current strength varies with voltage setup to a maximum of 35 mA, and the pulse frequency is user adjustable (2-70 Hz). |
| Kumar et al., 1998 <sup>84</sup>    | Not standard TENS - H-wave therapy                                                                                                                           | Evaluated transcutaneous electrostimulation for chronic painful peripheral neuropathy using H-Wave device with parameters distinct from standard TENS.                                                                                                                                                                                                                                                                                                                                                                                                                                                                     |
| Labrune et al., 2015 <sup>85</sup>  | No pain outcomes                                                                                                                                             | Evaluated randomized placebo control study to determine whether applying TENS before exercise in PAD patients could delay onset of pain and lead to longer walking distances                                                                                                                                                                                                                                                                                                                                                                                                                                               |
| Lan et al., 2012 <sup>86</sup>      | TENS delivered to acupuncture points distant to pain                                                                                                         | Evaluated TENS on six acupuncture points for pain after total hip arthroplasty for elderly patients. Acupuncture points were generally distant to the site of pain (bilateral P6 on anterior surface of the forearm; L14 on dorsum of hand; ipsilateral to the surgery ST36 anterior crest of the tibia; GB31 between greater trochanter of femur and hiatus of sacrum).                                                                                                                                                                                                                                                   |
| Lanham et al., 1984 <sup>87</sup>   | Not an RCT                                                                                                                                                   | Evaluated TENS combined with hypothermia in podiatric surgery by describing a series of 69 patients that received treatment. There was no comparison group                                                                                                                                                                                                                                                                                                                                                                                                                                                                 |
| Lee et al., 1997 <sup>88</sup>      | Not standard TENS - medium frequency AC plus galvanic                                                                                                        | Evaluated electrical stimulation for pain associated with myofascial trigger points. The type of current was a combination of medium-frequency AC current and Galvanic current at a frequency of 50-100Hz Not standard TENS - combination of medium frequency AC plus galvanic                                                                                                                                                                                                                                                                                                                                             |
| Lee et al., 2015 <sup>89</sup>      | Unable to isolate TENS effects                                                                                                                               | Evaluated effect of a device combining high-frequency transcutaneous electrical nerve stimulation and thermotherapy (I-Rune I-200L, Midirune Co.) for primary dysmenorrhea. Not possible to isolate TENS because TENS and thermal therapies combined                                                                                                                                                                                                                                                                                                                                                                       |
| Lehmann et al., 1983 <sup>90</sup>  | Not standard TENS characteristics – delivered below sensory detection threshold (subthreshold TENS – reporting data from same sample as Lehmann et al., 1986 | Evaluated subthreshold TENS versus placebo TENS and electroacupuncture for chronic low back pain. Analysis of nonorganic findings.                                                                                                                                                                                                                                                                                                                                                                                                                                                                                         |
| Lehmann et al., 1986 <sup>91</sup>  | Not standard TENS characteristics – delivered below sensory detection threshold (subthreshold TENS – probably reporting same data as Lehmann et al., 1983    | Evaluated subthreshold TENS versus placebo TENS and electroacupuncture for chronic low back pain. Analysis of efficacy.                                                                                                                                                                                                                                                                                                                                                                                                                                                                                                    |

10\_OL-TABLE3\_ExcludedStudies

| Reference                                                                                                                                                                                                                                                                     | Reason for exclusion                                                                                                                                                                                                                                                          | Description of study                                                                                                                                                                                                                                                          |
|-------------------------------------------------------------------------------------------------------------------------------------------------------------------------------------------------------------------------------------------------------------------------------|-------------------------------------------------------------------------------------------------------------------------------------------------------------------------------------------------------------------------------------------------------------------------------|-------------------------------------------------------------------------------------------------------------------------------------------------------------------------------------------------------------------------------------------------------------------------------|
| 1<br>2<br>3<br>4<br>5<br>6<br>7<br>8<br>9<br>10<br>11<br>12<br>13<br>14<br>15<br>16<br>17<br>18<br>19<br>20<br>21<br>22<br>23<br>24<br>25<br>26<br>27<br>28<br>29<br>30<br>31<br>32<br>33<br>34<br>35<br>36<br>37<br>38<br>39<br>40<br>41<br>42                               | <p>4<br/>5<br/>6<br/>7<br/>8<br/>9<br/>10<br/>11<br/>12<br/>13<br/>14<br/>15<br/>16<br/>17<br/>18<br/>19<br/>20<br/>21<br/>22<br/>23<br/>24<br/>25<br/>26<br/>27<br/>28<br/>29<br/>30<br/>31<br/>32<br/>33<br/>34<br/>35<br/>36<br/>37<br/>38<br/>39<br/>40<br/>41<br/>42</p> | <p>4<br/>5<br/>6<br/>7<br/>8<br/>9<br/>10<br/>11<br/>12<br/>13<br/>14<br/>15<br/>16<br/>17<br/>18<br/>19<br/>20<br/>21<br/>22<br/>23<br/>24<br/>25<br/>26<br/>27<br/>28<br/>29<br/>30<br/>31<br/>32<br/>33<br/>34<br/>35<br/>36<br/>37<br/>38<br/>39<br/>40<br/>41<br/>42</p> |
| <p>4<br/>5<br/>6<br/>7<br/>8<br/>9<br/>10<br/>11<br/>12<br/>13<br/>14<br/>15<br/>16<br/>17<br/>18<br/>19<br/>20<br/>21<br/>22<br/>23<br/>24<br/>25<br/>26<br/>27<br/>28<br/>29<br/>30<br/>31<br/>32<br/>33<br/>34<br/>35<br/>36<br/>37<br/>38<br/>39<br/>40<br/>41<br/>42</p> | <p>4<br/>5<br/>6<br/>7<br/>8<br/>9<br/>10<br/>11<br/>12<br/>13<br/>14<br/>15<br/>16<br/>17<br/>18<br/>19<br/>20<br/>21<br/>22<br/>23<br/>24<br/>25<br/>26<br/>27<br/>28<br/>29<br/>30<br/>31<br/>32<br/>33<br/>34<br/>35<br/>36<br/>37<br/>38<br/>39<br/>40<br/>41<br/>42</p> | <p>4<br/>5<br/>6<br/>7<br/>8<br/>9<br/>10<br/>11<br/>12<br/>13<br/>14<br/>15<br/>16<br/>17<br/>18<br/>19<br/>20<br/>21<br/>22<br/>23<br/>24<br/>25<br/>26<br/>27<br/>28<br/>29<br/>30<br/>31<br/>32<br/>33<br/>34<br/>35<br/>36<br/>37<br/>38<br/>39<br/>40<br/>41<br/>42</p> |
| <p>4<br/>5<br/>6<br/>7<br/>8<br/>9<br/>10<br/>11<br/>12<br/>13<br/>14<br/>15<br/>16<br/>17<br/>18<br/>19<br/>20<br/>21<br/>22<br/>23<br/>24<br/>25<br/>26<br/>27<br/>28<br/>29<br/>30<br/>31<br/>32<br/>33<br/>34<br/>35<br/>36<br/>37<br/>38<br/>39<br/>40<br/>41<br/>42</p> | <p>4<br/>5<br/>6<br/>7<br/>8<br/>9<br/>10<br/>11<br/>12<br/>13<br/>14<br/>15<br/>16<br/>17<br/>18<br/>19<br/>20<br/>21<br/>22<br/>23<br/>24<br/>25<br/>26<br/>27<br/>28<br/>29<br/>30<br/>31<br/>32<br/>33<br/>34<br/>35<br/>36<br/>37<br/>38<br/>39<br/>40<br/>41<br/>42</p> | <p>4<br/>5<br/>6<br/>7<br/>8<br/>9<br/>10<br/>11<br/>12<br/>13<br/>14<br/>15<br/>16<br/>17<br/>18<br/>19<br/>20<br/>21<br/>22<br/>23<br/>24<br/>25<br/>26<br/>27<br/>28<br/>29<br/>30<br/>31<br/>32<br/>33<br/>34<br/>35<br/>36<br/>37<br/>38<br/>39<br/>40<br/>41<br/>42</p> |

10\_OL-TABLE3\_ExcludedStudies

| Reference                                  | Reason for exclusion                                                                                                           | Description of study                                                                                                                                                                                                                                                                                                                                                                                                                                                                                                                                                                                       |
|--------------------------------------------|--------------------------------------------------------------------------------------------------------------------------------|------------------------------------------------------------------------------------------------------------------------------------------------------------------------------------------------------------------------------------------------------------------------------------------------------------------------------------------------------------------------------------------------------------------------------------------------------------------------------------------------------------------------------------------------------------------------------------------------------------|
| Mucuk and Baser, 2014 <sup>112</sup>       | Not standard TENS - TENS-acupuncture pen                                                                                       | Evaluated non-invasive electroacupuncture on labour pain using a TENS-acupuncture pen with a maximum output of 0.6mA administered to acupuncture points LI4 (hand)SP6 (leg/foot)                                                                                                                                                                                                                                                                                                                                                                                                                           |
| Mummolo et al., 2019 <sup>113</sup>        | Not RCT – retrospective evaluation                                                                                             | Evaluated effects of ultra-low-frequency transcutaneous electrical nerve stimulation (ULF-TENS) on pain and electromyographic values in subjects affected by temporomandibular disorder                                                                                                                                                                                                                                                                                                                                                                                                                    |
| Murina et al., 2008 <sup>114</sup>         | TENS administered internally - intravaginal                                                                                    | Evaluated TENS to treat vestibulodynia using a dual channel portable TENS unit (YSY-EST device) and a commercially available plastic vaginal probe with two gold metallic transversal rings as electrodes (Periprobe VAG2ST Beac, Pavia, Italy) inserted 20 mm into the vagina                                                                                                                                                                                                                                                                                                                             |
| Murina et al., 2018 <sup>115</sup>         | TENS administered internally - intravaginal                                                                                    | Evaluated TENS plus diazepam to treat vestibulodynia using a dual channel portable TENS unit (NeuroTrac Continence; VerityMedical, London, UK) and a commercially available plastic vaginal probe with two gold metallic transversal rings (Periprobe VAG2ST Beac, Pavia, Italy) inserted 20 mm into the vagina                                                                                                                                                                                                                                                                                            |
| Mysliwiec et al., 2011 <sup>116</sup>      | No pain outcomes                                                                                                               | Evaluated effect of cervical traction and TENS on strength of painless grip                                                                                                                                                                                                                                                                                                                                                                                                                                                                                                                                |
| Naeser et al., 2002 <sup>117</sup>         | Not standard TENS – microcurrent electrical stimulation                                                                        | Evaluated carpal tunnel syndrome pain treated with low-level laser and microamperes transcutaneous electric nerve stimulation                                                                                                                                                                                                                                                                                                                                                                                                                                                                              |
| Nakano et al., 2019 <sup>118</sup>         | Not RCT                                                                                                                        | Evaluated effects of TENS on pain and other physical symptoms in 20 in-patients with advanced cancer receiving palliative care                                                                                                                                                                                                                                                                                                                                                                                                                                                                             |
| Ngai et al., 2010 <sup>119</sup>           | Not clinical pain                                                                                                              | Evaluated Acu-TENS on functional capacity and beta-endorphin level in subjects with chronic obstructive pulmonary disease                                                                                                                                                                                                                                                                                                                                                                                                                                                                                  |
| Noehren et al., 2015 <sup>120</sup>        | Protocol – ongoing study                                                                                                       | Protocol of an RCT to evaluate TENS for fibromyalgia: a double-blind randomized clinical trial. Full RCT published <b>after our search</b> Dailey et al., 2019 <i>Arthritis Rheumatol.</i> 2019 Nov 18. doi: 10.1002/art.41170.                                                                                                                                                                                                                                                                                                                                                                            |
| Nourbakhsh and Fearon, 2008 <sup>121</sup> | Not standard TENS device or electrodes                                                                                         | Evaluation of noxious level electrical stimulation on chronic lateral epicondylitis administered using a MRL Neuroprobe System V (CR Kesner Company, Geneva, IL, USA) as painful stimulation of trigger points for 30s using 4Hz interrupted DC current and a probe electrode                                                                                                                                                                                                                                                                                                                              |
| Okonkwo et al., 2018 <sup>122</sup>        | Not an RCT                                                                                                                     | Evaluation of TENS for post-injection sciatic pain in a non-randomized controlled clinical trial.                                                                                                                                                                                                                                                                                                                                                                                                                                                                                                          |
| Oyibo et al., 2004 <sup>123</sup>          | Not standard TENS - microcurrent electrical stimulation                                                                        | Evaluated electrical stimulation therapy through silver-plated nylon-Dacron™ stocking electrodes (Micro-Z, Prizm Medical, Duluth, GA, USA) for painful diabetic neuropathy. Pulsed electric current were delivered a subsensory dose approximately 50 micro amps at 80 pulses per second for the first 10 min, then 8 pulses per second for the next 10 min each hour over an 8-h period.                                                                                                                                                                                                                  |
| Ozen et al., 2019 <sup>124</sup>           | Cannot isolate TENS - hotpack, transcutaneous electrical nerve stimulation (TENS), and ultrasound                              | Evaluated effects of physiotherapy modalities with those of acupuncture on pain, daily function, and quality of life in FMS patients.                                                                                                                                                                                                                                                                                                                                                                                                                                                                      |
| Park et al., 2014 <sup>125</sup>           | No pain outcomes                                                                                                               | Evaluated TENS with exercise on spasticity, balance, and gait in patients with chronic stroke. No pain outcomes.                                                                                                                                                                                                                                                                                                                                                                                                                                                                                           |
| Patel et al., 2016 <sup>126</sup>          | Unable to isolate TENS effects                                                                                                 | Evaluated TENS with McKenzie method for lumbar radiculopathy. Not possible to isolate the effects of TENS from McKenzie                                                                                                                                                                                                                                                                                                                                                                                                                                                                                    |
| Peng et al., 2010 <sup>127</sup>           | Not an RCT                                                                                                                     | Evaluated TENS on Acupoints for labour pain. Stated a Non-randomized Controlled Study                                                                                                                                                                                                                                                                                                                                                                                                                                                                                                                      |
| Polat et al., 2017 <sup>128</sup>          | Not an RCT                                                                                                                     | Evaluated TENS combined with hot pack and home exercise program for osteoarthritis of the knee with and without neuropathic pain. There was no comparison intervention                                                                                                                                                                                                                                                                                                                                                                                                                                     |
| Pope et al., 1994 <sup>129</sup>           | Not standard TENS - neuromuscular electrical stimulation                                                                       | Evaluated transcutaneous muscle stimulation for sub-acute low back pain using a Myocare PLUS device which is considered to be a neuromuscular stimulator and thus excluded. Note: Currents produced physiological stimulation that could be considered within the scope of 'standard TENS' Biphasic pulses 37pps pulse duration 225 us with pulse amplitude modulated (ramped up in 2 s held for 6s then ramped off in 2s ... then a pause before cycle repeated. 4 electrodes placed on back around pain and current delivered to maintain sensation as high as possible – no mention of muscle twitching |
| Pour et al., 2012 <sup>130</sup>           | TENS applied to acupuncture points away from painful area [TENS applied to acupuncture points on foot and SP6 for labour pain] | Evaluated effect of two methods of compressive medicine and electrical stimulation of the skin on the severity of labour pains in the first pregnant women.                                                                                                                                                                                                                                                                                                                                                                                                                                                |
| Quinton et al., 1987 <sup>131</sup>        | Some participants not adults                                                                                                   | Evaluated TENS in acute hand infections. Sample included at least one child under 16years of age (age range from 15 to 66 years).                                                                                                                                                                                                                                                                                                                                                                                                                                                                          |
| Radhakrishna et al., 2020 <sup>132</sup>   | TENS applied pre-emptive before general surgery and pain measured post operatively without TENS                                | Evaluated the effect of immediate preoperative TENS on intraoperative anaesthetic drug consumption in patients undergoing lumbar discectomy under general anaesthesia                                                                                                                                                                                                                                                                                                                                                                                                                                      |

## 10\_OL-TABLE3\_ExcludedStudies

| Reference                                       | Reason for exclusion                                                                                  | Description of study                                                                                                                                                                                                                                                                                                                                                                                                                                                                                                                                                                                                                                                                                                                                                                                                                                                                                                                                             |
|-------------------------------------------------|-------------------------------------------------------------------------------------------------------|------------------------------------------------------------------------------------------------------------------------------------------------------------------------------------------------------------------------------------------------------------------------------------------------------------------------------------------------------------------------------------------------------------------------------------------------------------------------------------------------------------------------------------------------------------------------------------------------------------------------------------------------------------------------------------------------------------------------------------------------------------------------------------------------------------------------------------------------------------------------------------------------------------------------------------------------------------------|
| Rapoport et al., 2019 <sup>133</sup>            | Not TENS - secondary report of Yartisky                                                               | Performed a post-hoc analysis on a subgroup of participants with migraine from a randomized, double-blind, parallel-group, sham-controlled, multicentre study                                                                                                                                                                                                                                                                                                                                                                                                                                                                                                                                                                                                                                                                                                                                                                                                    |
| Razavi and Jansen, 2004 <sup>134</sup>          | Not standard TENS - placebo TENS only                                                                 | Evaluated acupuncture and placebo TENS in addition to exercise in treatment of rotator cuff tendinitis. No active TENS intervention.                                                                                                                                                                                                                                                                                                                                                                                                                                                                                                                                                                                                                                                                                                                                                                                                                             |
| Reich et al., 1989 <sup>135</sup>               | Unable to isolate TENS effects                                                                        | Evaluated various non-invasive treatments for vascular and muscle contraction headache including an 'Electrical Group' that received either traditional TENS or electrical neurotransmitter modulation, either singly or in combination. Data was analysed at group rather than modality level.                                                                                                                                                                                                                                                                                                                                                                                                                                                                                                                                                                                                                                                                  |
| Reichstein et al., 2005 <sup>136</sup>          | Not standard TENS – H wave characteristics delivered using a CEFAR Dumo TENS device                   | Evaluated effects of high-frequency external muscle stimulation (HF) with those of TENS in patients with diabetic distal symmetrical sensory polyneuropathy.                                                                                                                                                                                                                                                                                                                                                                                                                                                                                                                                                                                                                                                                                                                                                                                                     |
| Rodriguez-Fernandez et al., 2011 <sup>137</sup> | Not clinical pain - sample of pain-free participants                                                  | Evaluated burst-type TENS on cervical range of motion and latent myofascial trigger point sensitivity in a sample of individuals recruited from a pain-free population with at least 1 latent myofascial trigger point in their upper trapezius. Sample not recruited from clinical pain population.                                                                                                                                                                                                                                                                                                                                                                                                                                                                                                                                                                                                                                                             |
| Rooney et al., 1986 <sup>138</sup>              | No pain outcomes                                                                                      | Evaluated cryoanalgesia and TENS on pulmonary function tests post thoracotomy. No pain outcome                                                                                                                                                                                                                                                                                                                                                                                                                                                                                                                                                                                                                                                                                                                                                                                                                                                                   |
| Roth and Thrash, 1986 <sup>139</sup>            | Not standard TENS - microampere currents, and not standard electrodes and invasive technique          | Evaluated TENS for pain associated with orthodontic tooth movement. In one group TENS was applied externally over zygomatic arches using sponge pad electrodes – not standard TENS electrodes (0.5 Hz with an intensity of 500 mA). In one group TENS was applied internally (intraoral) directly to teeth using one probe electrode on the crown of each tooth and the other electrode on the palatal mucosa adjacent to the tooth (0.5 Hz, intensity of 50 mA) – Internal Currents were delivered using Alpha-Stim model 2000 which produces a biphasic waveform with varying pulse widths in the millisecond range and intensities in the microampere range (i.e. microcurrent). It is probable that 500mA and 50mA were typographical errors that should read 500 microampere and 50 microamperes. "Both groups were told that the intensity of the current was so small that the most they would feel was a very slight tingling, if anything at all." p133 |
| Santiesteban et al., 1985 <sup>140</sup>        | TENS delivered to acupuncture points distant to pain                                                  | Evaluated TENS on acupuncture points for primary spasmodic dysmenorrhea using a MRL pain control system (5Hz, 250us, intensity to patient tolerance). Acupuncture points were not covering painful site (GB34, Sp6, (leg).                                                                                                                                                                                                                                                                                                                                                                                                                                                                                                                                                                                                                                                                                                                                       |
| Sari et al., 2019 <sup>141</sup>                | Unable to isolate TENS                                                                                | Evaluated intermittent pneumatic compression along with conventional treatment with cold pack treatment along with conventional treatment on clinical outcomes in patients with knee osteoarthritis                                                                                                                                                                                                                                                                                                                                                                                                                                                                                                                                                                                                                                                                                                                                                              |
| Schuster et al., 1980 <sup>142</sup>            | Not an RCT - 26 control patients were selected at random. Records were matched as closely as possible | Evaluated use of TENS and narcotic analgesics in relieving post-operative pain.                                                                                                                                                                                                                                                                                                                                                                                                                                                                                                                                                                                                                                                                                                                                                                                                                                                                                  |
| Schoenen et al., 2013 <sup>143</sup>            | Not standard TENS - supraorbital transcutaneous stimulator                                            | Evaluated trigeminal neurostimulation with a supraorbital transcutaneous stimulator (Cefaly, STX-Med., Herstal, Belgium) for migraine prevention. Neurostimulation delivered with one 30 mm 3x94 mm self-adhesive electrode on forehead and delivery of biphasic rectangular pulsed currents (250 µs, 60 Hz, 16 mA).                                                                                                                                                                                                                                                                                                                                                                                                                                                                                                                                                                                                                                             |
| Schomburg and Carter-Baker, 1983 <sup>144</sup> | Not an RCT                                                                                            | Evaluated TENS for post laparotomy pain compared with chart review to 75 patients who had undergone similar surgical procedures performed by the same surgeon before TENS postoperative pain management had been instituted.                                                                                                                                                                                                                                                                                                                                                                                                                                                                                                                                                                                                                                                                                                                                     |
| Selfe et al., 2008 <sup>145</sup>               | Not standard TENS - noninvasive interactive neurostimulation (InterX5000 device)                      | Evaluated Noninvasive Interactive Neurostimulation on Symptoms of Osteoarthritis of the Knee using an InterX5000 device (Neuro Resource Group, Plano, TX)                                                                                                                                                                                                                                                                                                                                                                                                                                                                                                                                                                                                                                                                                                                                                                                                        |
| Shirazi et al., 2014 <sup>146</sup>             | Not an RCT                                                                                            | Evaluated TENS on joint position sense in patients with knee joint osteoarthritis. Pre-post study without a comparison group.                                                                                                                                                                                                                                                                                                                                                                                                                                                                                                                                                                                                                                                                                                                                                                                                                                    |
| Silberstein et al., 2016 <sup>147</sup>         | Not standard TENS - 5KHz sine wave                                                                    | Evaluated non-invasive vagus nerve stimulation for chronic migraine headache prevention using low voltage 5KHz sine wave lasting 1 millisecond with such bursts repeated every 40 milliseconds (Electrocore Ltd)                                                                                                                                                                                                                                                                                                                                                                                                                                                                                                                                                                                                                                                                                                                                                 |
| Silberstein et al., 2016 <sup>148</sup>         | Not standard TENS - 5KHz sine wave                                                                    | Evaluated non-invasive vagus nerve stimulation for the acute cluster headache using low voltage 5KHz sine wave lasting 1 millisecond with such bursts repeated every 40 milliseconds (Electrocore Ltd)                                                                                                                                                                                                                                                                                                                                                                                                                                                                                                                                                                                                                                                                                                                                                           |
| Simon et al., 2015 <sup>149</sup>               | Not an RCT                                                                                            | Evaluated TENS for chronic axial low back pain on a single cohort stratified for age. Dose-response study with no other intervention comparison groups.                                                                                                                                                                                                                                                                                                                                                                                                                                                                                                                                                                                                                                                                                                                                                                                                          |
| Simpson and Ward, 2004 <sup>150</sup>           | Not standard TENS - transcutaneous spinal electroanalgesia                                            | Evaluated transcutaneous spinal electroanalgesia for pain from chronic critical limb ischemia. Transcutaneous spinal electroanalgesia uses two electrodes placed over dorsal spine and delivers currents that do not cause action potentials in peripheral nerves and no sensation of paraesthesia (4 us, 1800–2500 Hz, 100–300 V, Advanced Pain Management)                                                                                                                                                                                                                                                                                                                                                                                                                                                                                                                                                                                                     |



## 10\_OL-TABLE3\_ExcludedStudies

| Reference                                       | Reason for exclusion                                                      | Description of study                                                                                                                                                                                                                                                                                                                                                                                                                                                                                        |
|-------------------------------------------------|---------------------------------------------------------------------------|-------------------------------------------------------------------------------------------------------------------------------------------------------------------------------------------------------------------------------------------------------------------------------------------------------------------------------------------------------------------------------------------------------------------------------------------------------------------------------------------------------------|
| Solomon and Guglielmo, 1985 <sup>151</sup>      | Not standard TENS - microcurrent electrical stimulation                   | Evaluated TENS for headache using a device that "... differs from most other TENS equipment by its low amperage (maximum 4 milliamperes), high frequency (12,000 to 20,000 Hz rectified to monophasic wave form) and short pulse width (approximately 30 microsec)" p 12                                                                                                                                                                                                                                    |
| Solomon et al., 1989 <sup>152</sup>             | Not standard TENS - microcurrent electrical stimulation                   | Evaluated Cranial Electrotherapy in the Treatment of Tension Headache using "... extremely low level, high frequency current applied transcranially" – microcurrent p 445                                                                                                                                                                                                                                                                                                                                   |
| Sonde et al., 2000 <sup>153</sup>               | No pain outcomes                                                          | Evaluated TENS for post-stroke paretic arm on functional outcomes including spasticity and activities of daily function but not pain                                                                                                                                                                                                                                                                                                                                                                        |
| Stralka et al., 1998 <sup>154</sup>             | Not standard TENS - high voltage pulsed direct current                    | Evaluated high voltage pulsed direct current built into a wrist splint for hand and wrist pain                                                                                                                                                                                                                                                                                                                                                                                                              |
| Stratton and Smith, 1980 <sup>155</sup>         | No pain outcomes                                                          | Evaluated TENS for postoperative thoracotomy on ventilatory function including forced vital capacity but not pain                                                                                                                                                                                                                                                                                                                                                                                           |
| Strayhorn et al., 1983 <sup>156</sup>           | Not an RCT                                                                | Evaluated TENS on use of narcotic analgesics and occurrence of postoperative complications following gastric bypass surgery for control of obesity from chart review                                                                                                                                                                                                                                                                                                                                        |
| Sun et al., 2017 <sup>157</sup>                 | Not standard TENS - transcutaneous electric acupoint stimulation          | Evaluated Perioperative Transcutaneous Electrical Acupoint Stimulation for Postoperative Pain Relief Following Laparoscopic Surgery using a HANS Acupoint Nerve Stimulator (HANS-200A, Nanjing Jisheng Medical Technology Company, Nanjing, China) delivering an alternating dense and disperse stimulation (2Hz (0.6 ms pulse width) alternated with 100 Hz stimulation (0.2 ms pulse width) every 3 seconds to maximum current tolerated but subnoxious) to Hegu (LI4) and Neiguan (P6) distant from pain |
| Sunshine et al., 1996 <sup>158</sup>            | Not standard TENS – microcurrent electrical stimulation                   | Evaluated microcurrent TENS and massage for fibromyalgia (Electroacustope device)                                                                                                                                                                                                                                                                                                                                                                                                                           |
| Takla and Rezk-Allah, 2018 <sup>159</sup>       | Not standard TENS - combination therapy, unable to isolate effect of TENS | Evaluated simultaneous application of TENS and ultrasound phonophoresis on active myofascial trigger points as a combined therapy using an Intellect Advanced Combo therapy system (2752CC; Chattanooga DJO France SAS Industries; Mexico) device. Using an ultrasound treatment head as an electrode and not possible to isolate TENS - Combined therapy                                                                                                                                                   |
| Takla et al., 2018 <sup>160</sup>               | Not standard TENS - combination therapy, unable to isolate effect of TENS | Evaluated low-frequency high-intensity versus medium-frequency low-intensity TENS delivered as combined therapy with ultrasound phonophoresis for management of active myofascial trigger points using an Intellect Advanced Combo therapy system (2752CC; Chattanooga DJO France SAS Industries; Mexico) device. Using an ultrasound treatment head as an electrode and not possible to isolate TENS - Combined therapy                                                                                    |
| Thiese et al., 2013 <sup>161</sup>              | Not an RCT                                                                | Evaluated electrical stimulation for chronic non-specific low back pain in a working-age population – Report of a Protocol                                                                                                                                                                                                                                                                                                                                                                                  |
| Thompson et al., 2008 <sup>162</sup>            | Not standard TENS - transcutaneous spinal electroanalgesia                | Evaluated transcutaneous spinal electroanalgesia (TSE) on low back pain. "...TSE bears a superficial resemblance to transcutaneous electrical nerve stimulation (TENS) but differs in that it is applied to the skin overlying the vertebral spine and uses stimulation frequencies far higher (2500+ Hz) than those used for TENS (circa 1–150 Hz).... The pulse widths used for the two systems are also substantially different (4 ls for TSE compared with 50–200 ls for TENS)."                        |
| Tok et al., 2011 <sup>163</sup>                 | Unable to isolate TENS effects                                            | Evaluated electrical stimulation combined with continuous passive motion on symptoms, functional capacity, quality of life and balance in knee osteoarthritis. Combination therapy not possible to isolate contribution of TENS.                                                                                                                                                                                                                                                                            |
| Tousignant-Laflamme et al., 2017 <sup>164</sup> | Not an RCT - only one intervention                                        | Evaluated acupuncture-like TENS for chronic low back pain. Design was a randomized, crossover study to determine the duration of analgesia following 15- and 30-minute treatment. No comparison intervention group.                                                                                                                                                                                                                                                                                         |
| Tu et al., 2019 <sup>165</sup>                  | TENS delivered to acupuncture points distant to pain                      | Evaluated transcutaneous electrical acupoint stimulation on postoperative analgesia after ureteroscopic lithotripsy delivered to bilateral Shenyu (BL23) outside spinous process of L2 and SP9 between posterior tibia border and gastrocnemius muscle using a HANS LH-202 electrical stimulator.                                                                                                                                                                                                           |
| Vance et al., 2018 <sup>166</sup>               | Not an RCT                                                                | Development of a method to maximize intensity of TENS used for fibromyalgia by analysing baseline data from an ongoing clinical RCT investigating the effects of TENS in women with fibromyalgia – the Fibromyalgia Activity Study with TENS (FAST; NCT01888640).                                                                                                                                                                                                                                           |
| VanderArk and McGrath, 1975 <sup>167</sup>      | Some participants not adults                                              | Evaluated TENS for post-operative pain. Some participants were not adults (13 years to 87 years).                                                                                                                                                                                                                                                                                                                                                                                                           |
| Vincenti et al., 1982 <sup>168</sup>            | Not an RCT                                                                | Evaluated TENS for labour pain.                                                                                                                                                                                                                                                                                                                                                                                                                                                                             |
| Vinterberg et al. 1978 <sup>169</sup>           | Not an RCT                                                                | Evaluated TENS for rheumatoid arthritis.                                                                                                                                                                                                                                                                                                                                                                                                                                                                    |



## 10\_OL-TABLE3\_ExcludedStudies

| Reference                                      | Reason for exclusion                                                               | Description of study                                                                                                                                                                                                                                                                                                                                                                       |
|------------------------------------------------|------------------------------------------------------------------------------------|--------------------------------------------------------------------------------------------------------------------------------------------------------------------------------------------------------------------------------------------------------------------------------------------------------------------------------------------------------------------------------------------|
| Wang et al., 1988 <sup>170</sup>               | Some participants not adults                                                       | Evaluated TENS for sickle cell pain crises. Some participants were not adults (12years to 27 years)                                                                                                                                                                                                                                                                                        |
| Wang, 1997 <sup>171</sup>                      | Not standard TENS - transcutaneous electric acupoint stimulation                   | Evaluated transcutaneous electrical acupoint stimulation on analgesic consumption post operation lower abdomen surgery at acupuncture points (Hegu (LI14) and either side of the incision site) using dense-disperse current.                                                                                                                                                              |
| Wang et al., 2007 <sup>172</sup>               | Not standard TENS - acupuncture acupoint stimulator                                | Evaluated TENS applied to acupoints for labour pain using an acupuncture acupoint stimulator (G-6502-2A). Acupuncture points LI4 PC6 SP6 LR3 not at site of pain.                                                                                                                                                                                                                          |
| Wang et al., 2007 <sup>173</sup>               | TENS delivered to acupuncture points distant to pain                               | Evaluated abdominal acupuncture TENS on leg shoulder loin and neck pain using acupuncture points that are distant from pain LI4 PC6 SP6 LR3 – in Chinese Excluded based on abstract.                                                                                                                                                                                                       |
| Wang et al., 2007 <sup>174</sup>               | Not standard TENS - 'pen shaped' electrodes                                        | Evaluated acupuncture-like electrical stimulation on chronic tension-type headache using a 'pen shaped' electrode with a tip diameter of 1mm delivering dense-and-disperse currents (TAO, MibiTech ApS, Helsingør, Denmark) to six acupoints distant to the pain , bilateral EX-HN5, GB 20, LI 4                                                                                           |
| Wang et al., 2008 <sup>175</sup>               | Not standard TENS - transcutaneous electric acupoint stimulation                   | Evaluated pre and during surgery TEAS on blood bioactive compounds involving cerebral injury during craniotomy at LI4, LI11 ST36 SP6 distant to pain not at site of pain. No pain measure in Chinese Excluded based on abstract.                                                                                                                                                           |
| Wang et al., 2009 <sup>176</sup>               | Not standard TENS - transcutaneous electric acupoint stimulation                   | Wang, Z. X. (2009) Clinical observation on electroacupuncture at acupoints for treatment of senile radical sciatica. [Chinese]. Zhongguo zhen jiu = Chinese acupuncture & moxibustion 29 (2), 126-128.                                                                                                                                                                                     |
| Wang et al., 2014 <sup>177</sup>               | Not standard TENS - transcutaneous electric acupoint stimulation                   | Evaluated transcutaneous electric acupoint stimulation on intra-operative remifentanyl consumption and postoperative side-effects in patients undergoing sinusotomy delivered to Hegu (LI4), Neiguan (PC6), and Zusanli (ST36) a 6–9mA, 2/10 Hz before anaesthesia.                                                                                                                        |
| Ward et al., 2009 <sup>178</sup>               | Not clinical pain - sample of pain-free participants                               | Evaluated A efficacy of medium frequency alternating current and TENS on healthy participants.                                                                                                                                                                                                                                                                                             |
| Wattrisse et al., 1993 <sup>179</sup>          | Not standard TENS - Limoges currents                                               | Evaluated effect of transcutaneous cranial electrical stimulation with Limoges currents – French. Excluded based on abstract.                                                                                                                                                                                                                                                              |
| Weng et al., 2005 <sup>180</sup>               | Not standard TENS - 5KHz currents modulated at lower frequencies                   | <i>Evaluated modulated-frequency mode of AL-TENS on tennis elbow pain. "... treated with either 5 KHz modulated by 2 Hz frequency mode (LF group), 5 KHz modulated by 100 Hz frequency mode of TENS (HF group) on acupuncture points (LI10 and LI11)". Output characteristics seems to be a carrier wave of 5KHz modulated at 2Hz or 100Hz.</i>                                            |
| Whitehair et al., 2019 <sup>181</sup>          | Not TENS                                                                           | Evaluated acute effects of TENS, transcutaneous neuromuscular electrical stimulation and no stimulation on pain-free passive range of motion of the shoulder in subjects with hemiplegic shoulder pain                                                                                                                                                                                     |
| Wieselmann-Penkner et al., 2001 <sup>182</sup> | No pain outcomes                                                                   | Evaluated TENS and EMG-biofeedback on muscular relaxation in bruxism.                                                                                                                                                                                                                                                                                                                      |
| Williams et al., 2019 <sup>183</sup>           | Not TENS Not RCT - healthy humans                                                  | Evaluated conditioned pain modulation efficiency in persons with and without migraine headaches                                                                                                                                                                                                                                                                                            |
| Williams 2019 <sup>184</sup>                   | Not RCT - Abstract                                                                 | Evaluated feasibility of TENS as adjunctive treatment for post-operative orthopaedic pain.                                                                                                                                                                                                                                                                                                 |
| Wilson and Stanczak, 2020 <sup>185</sup>       | Not an RCT - Review                                                                | Round-up of the current body of evidence of using TENS for pain control in patients with advanced cancer and palliative pain.                                                                                                                                                                                                                                                              |
| Wong et al., 2003 <sup>186</sup>               | Not standard TENS - Codetron                                                       | Evaluated acupuncture-like TENS for radiation-induced xerostomia associated with radical radiotherapy using Codetron device that delivers electrical currents randomly between 6 electrodes. Report of phase 1 of the RCT trial. Not an RCT                                                                                                                                                |
| Wong et al., 2012 <sup>187</sup>               | Not standard TENS - Codetron                                                       | Evaluated acupuncture-like TENS for radiation-induced xerostomia associated with radical radiotherapy using Codetron device. "... This particular TENS device ...differs from conventional TENS units, because it embeds a random circuit that enables random switching among 6 electrodes to prevent brain habituation to continuous stimulation" page 4245. Report of phase 2 of the RCT |
| Wu et al., 2012 <sup>188</sup>                 | Not standard TENS - middle frequency electrical stimulation                        | Evaluation of middle frequency electrical stimulation for dysmenorrhea. Currents delivered at frequency of 1000 -10,0000 Hz to acupuncture points not covering pain site (LI4 SP6) using a GM390TE, GEMORE device                                                                                                                                                                          |
| Xu et al., 2014 <sup>189</sup>                 | Cannot isolate TENS because all groups received identical TENS as combined therapy | Evaluated TENS in combination with cobalamin injection for postherpetic neuralgia.                                                                                                                                                                                                                                                                                                         |
| Xie et al., 2017 <sup>190</sup>                | Not standard TENS - transcutaneous electric acupoint stimulation                   | Evaluated transcutaneous electrical acupoint stimulation combined with palonosetron on chemotherapy-induced nausea and vomiting. No pain outcomes.                                                                                                                                                                                                                                         |
| Yang et al., 2017 <sup>191</sup>               | Not an RCT                                                                         | Evaluated acupuncture like TENS on knee osteoarthritis (KOA) with low pain. Single intervention group divided according to low and high pain                                                                                                                                                                                                                                               |

10\_OL-TABLE3\_ExcludedStudies

| Reference                              | Reason for exclusion                                                             | Description of study                                                                                                                                                                                                                                                                                                                                                                                                                                                                                                    |
|----------------------------------------|----------------------------------------------------------------------------------|-------------------------------------------------------------------------------------------------------------------------------------------------------------------------------------------------------------------------------------------------------------------------------------------------------------------------------------------------------------------------------------------------------------------------------------------------------------------------------------------------------------------------|
| Yang et al., 2017 <sup>192</sup>       | Not clinical pain - slow-transit constipation                                    | Evaluated transcutaneous electrical stimulation in women with slow-transit constipation. Primary purpose of study was to evaluate slow-transit constipation and associated symptoms of constipation, including abdominal pain as a secondary outcome. Target sample was women with slow-transit constipation rather than patients with clinical pain.                                                                                                                                                                   |
| Yao et al., 2015 <sup>193</sup>        | Not standard TENS - transcutaneous electric acupoint stimulation                 | Evaluated transcutaneous electric acupoint stimulation on quality of recovery and postoperative analgesia after gynaecological laparoscopic surgery to Hegu (LI4), Neiguan (PC6), Zusanli (ST36), and Sanyinjiao (SP6) acupoints distant from pain using a Hans electronic acupuncture apparatus (dense-disperse frequency (2/10 Hz), 6–9mA, HANS-100B, Nanjing Jisheng Medical Technology Company, Nanjing, China).                                                                                                    |
| Yarnitsky et al., 2017) <sup>194</sup> | Not standard TENS - Remote Electrical Neuromodulation                            | Evaluated remote nonpainful electrical upper arm skin stimulation for reducing migraine attack pain. Remote Electrical Neuromodulation uses the principles of conditioned pain modulation applying high intensity TENS to the arm for migraine. Authors argue that REN on arm has neural relationship to migraine pain - we exclude because authors do not call this technique TENS, location of electrodes are remote, and currents delivered using parameters to simulate elicit conditioned pain modulation systems. |
| Yarnitsky et al., 2019) <sup>195</sup> | Not standard TENS and not at site of pain ... much debate in team on this though | Evaluated efficacy and safety of a remote electrical neuromodulation (REN) device for the acute treatment of migraine.                                                                                                                                                                                                                                                                                                                                                                                                  |
| Yeh et al., 2010 <sup>196</sup>        | Not standard TENS - transcutaneous electric acupoint stimulation                 | Evaluated transcutaneous acupoint electrical stimulation for postoperative pain in patients with patient-controlled analgesia. TEAS delivered at acupoints distant from pain, BL40, GB34, HT7, P6                                                                                                                                                                                                                                                                                                                       |
| Yeh et al., 2018 <sup>197</sup>        | Not standard TENS - transcutaneous electric acupoint stimulation                 | Evaluated transcutaneous acupoint electrical stimulation on post-hemorrhoidectomy-associated pain, anxiety, and heart rate variability at acupoints distant from pain, <i>chengshan</i> (BL57) and <i>erbai</i> (EX-UE2) and a stimulator (D0205KL, Ching-Ming Co., Taiwan) delivering dense disperse currents                                                                                                                                                                                                          |
| Yilmaz et al., 2020 <sup>198</sup>     | Not possible to isolate the effects of TENS - "a combination of US, TENS"        | Evaluated high-intensity laser therapy (HILT) and a combination of transcutaneous nerve stimulation (TENS) and ultrasound (US) treatment on pain, range of motion (ROM) and functional activity on cervical pain associated with cervical disc herniation (CDH).                                                                                                                                                                                                                                                        |
| Yip et al., 2007 <sup>199</sup>        | Unable to isolate TENS effects                                                   | Evaluated combined transcutaneous acupoint electrical stimulation and electromagnetic millimetre waves for spinal pain. Not possible to isolate TENS                                                                                                                                                                                                                                                                                                                                                                    |
| Yousef et al., 2015 <sup>200</sup>     | Not standard TENS - posterior tibial nerve stimulation                           | Evaluated transcutaneous electrical posterior tibial nerve stimulation versus lateral internal sphincterotomy for treatment of chronic anal fissure. Transcutaneous electrical nerve stimulation of posterior tibial nerve is used for faecal and urinary incontinence and was applied using an Endomed 182 device (Enraf Nonius, Holland) with the negative contact electrode on the ankle skin behind the medial malleolus, and the positive electrode, 10 cm above the negative electrode.                           |
| Yu et al., 2019 <sup>201</sup>         | Not standard TENS - TEAS                                                         | Evaluated TEAS on early recovery in patients undergoing gynaecological laparoscopic surgery.                                                                                                                                                                                                                                                                                                                                                                                                                            |
| Zeb et al., 2019 <sup>202</sup>        | Not RCT                                                                          | Evaluated effectiveness TENS in management of neuropathic pain in post-traumatic incomplete spinal cord injury patients.                                                                                                                                                                                                                                                                                                                                                                                                |
| Zhan and Tian 2019 <sup>203</sup>      | Not standard TENS - TEAS                                                         | Evaluated effect and adverse effects of transverse abdominis plane block and TEAS on postoperative outcomes.                                                                                                                                                                                                                                                                                                                                                                                                            |
| Zhang et al., 2014 <sup>204</sup>      | Not standard TENS - transcutaneous electric acupoint stimulation                 | Evaluated pre-treatment with transcutaneous electrical acupoint stimulation on the quality of recovery after ambulatory breast surgery. Transcutaneous electrical acupoint stimulation was delivered at acupoints distant from pain LI4, PC4, ST36 (hand and arm) using a TEAS - SDZ-V dense and disperse device.                                                                                                                                                                                                       |
| Zhang et al., 2016 <sup>205</sup>      | Not standard TENS - transcutaneous electric acupoint stimulation                 | Evaluated TEAS before the anaesthesia induction on opioids consumption in patients undergoing off-pump coronary artery bypass grafting at distal-proximal acupoints combination (LI4 and CV17) and regional acupoints combination (CV17 and CV14) using a <i>Hwato</i> electronic acupuncture treatment instrument (model No. SDZ-V, Suzhou Medical Appliances Co., Ltd, Suzhou, China). - - <i>InJ Clin Exp Med</i> 9(12)                                                                                              |
| Zhang et al., 2017 <sup>206</sup>      | TENS delivered to body sites distant to pain                                     | Evaluated TENS of foot for postoperative bladder spasms and pain. Stimulation not on pain site                                                                                                                                                                                                                                                                                                                                                                                                                          |
| Zhang et al., 2020 <sup>207</sup>      | E - Not pain                                                                     | Evaluated effect of transcutaneous electrical stimulation treatment in combination with intraoperative nerve staining on sexual function after radical surgery.                                                                                                                                                                                                                                                                                                                                                         |
| Zhao et al., 2015 <sup>208</sup>       | Not standard TENS - transcutaneous electric acupoint stimulation                 | Evaluated transcutaneous electrical acupoint stimulation for spasticity following Brain Injury using an acupoint nerve electrical stimulator (HANS-100A, Nanjing Gensun medical technology company, Nanjing, China) at Hegu (LI4)–Yuji (LU10) and Zusanli (ST36)–Chengshan (BL57). Pain on Disability Assessment Scale was a secondary outcome.                                                                                                                                                                         |
| Zhou et al., 2018 <sup>209</sup>       | Not standard TENS - transcutaneous electric acupoint stimulation                 | Evaluated Transcutaneous Electrical Acupoint Stimulation for gastrointestinal dysfunction after caesarean section SP6 and ST36 acupoints using a <i>Hwato</i> electric acupuncture treatment instrument (model No. SDZV; Suzhou Medical Appliances Co. Ltd, Suzhou, China) with a dilatational wave of 2/10 Hz (2-second cycle) for 30 min. TEAS delivered at acupoints distant from pain.                                                                                                                              |

10\_OL-TABLE3\_ExcludedStudies

| Reference                         | Reason for exclusion                                    | Description of study                                                                                                                                                                                                                           |
|-----------------------------------|---------------------------------------------------------|------------------------------------------------------------------------------------------------------------------------------------------------------------------------------------------------------------------------------------------------|
| Zizic et al., 1995 <sup>210</sup> | Not standard TENS – microcurrent electrical stimulation | Evaluated pulsed electrical stimulation for osteoarthritis of the knee using low voltage (mean = 6.2V peak volts). Characteristics like those of microcurrent electrical stimulation although no overt statement to this effect in the report. |

## REFERENCES – EXCLUDED STUDIES WITH REASONS\*

\*Note: Reference numbering in this list relates only to studies cited in this table

- Aguilar Ferrandiz ME, Nijs J, Gidron Y, et al. Auto-Targeted Neurostimulation Is Not Superior to Placebo in Chronic Low Back Pain: A Fourfold Blind Randomized Clinical Trial. *Pain physician* 2016; **19**(5): E707-19.
- Albayrak I, Apiliogullari S, Dal CN, Levendoglu F, Ozerbil OM. Efficacy of Pulsed Radiofrequency Therapy to Dorsal Root Ganglion Adding to TENS and Exercise for Persistent Pain after Total Knee Arthroplasty. *Journal of Knee Surgery* 2017; **30**(2): 134-42.
- Alhusaini AA, Fallatah S, Melam GR, Buragadda S. Efficacy of transcutaneous electrical nerve stimulation combined with therapeutic exercise on hand function in children with hemiplegic cerebral palsy. *Somatosensory & motor research* 2019; **36**(1): 49-55.
- Altas EU, Demirdal U. The effect of physical therapy and rehabilitation modalities on sleep quality in patients with primary knee osteoarthritis: A single-blind, prospective, randomized-controlled study. *Turkish journal of physical medicine and rehabilitation* 2020; **66**(1): 73-83.
- Al Zamil M, Kulikova N, Bezrukova O, Volkova I, Stahurlova V. Comparative analysis between transcutaneous electroneurostimulation and acupuncture in treatment of carpal tunnel syndrome. *European Journal of Neurology* 2019; **26**: 729.
- Askin A, Savas S, Koyuncuoglu HR, Baloglu HH, Inci MF. Low dose high frequency ultrasound therapy for stellate ganglion blockade in complex regional pain syndrome type I: a randomised placebo controlled trial. *International Journal of Clinical and Experimental Medicine* 2014; **7**(12): 5603-11.
- Atalay C, Yilmaz KB. The effect of transcutaneous electrical nerve stimulation on postmastectomy skin flap necrosis. *Breast cancer research and treatment* 2009; **117**(3): 611-4.
- Augustinsson L, Bohlin P, Bundsen P, et al. Pain relief during delivery by transcutaneous electrical nerve stimulation. *Pain* 1977; **4**(1): 59-65.
- Avramidis K, Strike PW, Taylor PN, Swain ID. Effectiveness of electric stimulation of the vastus medialis muscle in the rehabilitation of patients after total knee arthroplasty. *Archives of physical medicine and rehabilitation* 2003; **84**(12): 1850-3.
- Aydin S, Arıoğlu Aydın Ç, Batmaz G, Dansuk R. Effect of vaginal electrical stimulation on female sexual functions: a randomized study. *Journal of sexual medicine* 2015; **12**(2): 463-9.
- Aydogan S, Er U, Ozlu O. Effectiveness of preemptive analgesia using a frequency rhythmic electrical modulation system in patients having instrumented fusion for lumbar stenosis. *Asian spine journal* 2014; **8**(2): 190-6.
- Ayyildiz A, Nuhoglu B, Huri E, Huri M, Gurdal M, Germiyanoglu C. Transcutaneous electrical nerve stimulation (TENS): Decreased of pain when extracorporeal shock wave lithotripsy. [Turkish]. *Turk Uroloji Dergisi* 2004; **30**(4): 446-50.
- Bai WY, Yang YC, Teng XF, Wan YX, Wei W, Zhu JC. Effects of Transcutaneous Electrical Acupoint Stimulation on the Stress Response During Extubation After General Anesthesia in Elderly Patients Undergoing Elective Supratentorial Craniotomy: a Prospective Randomized Controlled Trial. *Journal of neurosurgical anesthesiology* 2018; **30**(4): 337-46.
- Behm DG, Colwell EM, Power GMJ, et al. Transcutaneous electrical nerve stimulation improves fatigue performance of the treated and contralateral knee extensors. *European journal of applied physiology* 2019; **119**(11-12): 2745-55.
- Belmonte R, Tejero M, Ferrer M, et al. Efficacy of low-frequency low-intensity electrotherapy in the treatment of breast cancer-related lymphoedema: a cross-over randomized trial. *Clinical rehabilitation* 2012; **26**(7): 607-18.
- Bouafif L, Ellouze N. Design and evaluation of a modulated TENS stimulation in medical pain therapy. *Current Signal Transduction Therapy* 2019; **14**(1): 75-83.
- Bundsen P, Peterson L, Selstam U. Pain relief in labor by transcutaneous electrical nerve stimulation. A prospective matched study. *Acta obstetrica et gynecologica Scandinavica* 1981; **60**(5): 459-68.

## 10\_OL-TABLE3\_ExcludedStudies

18. Burch FX, Tarro JN, Greenberg JJ, Carroll WJ. Evaluating the benefits of patterned stimulation in the treatment of osteoarthritis of the knee: a multi-center, randomized, single-blind, controlled study with an independent masked evaluator. *Osteoarthritis and cartilage* 2008; **16**(8): 865-72.
19. Burssens P, Forsyth R, Steyaert A, van Ovost E, Praet M, Verdonk R. Influence of burst TENS stimulation on the healing of Achilles tendon suture in man. *Acta Orthopaedica Belgica* 2003 Dec;69(6):528-532 2003.
20. Carbonario F, Matsutani L, Yuan S, Marques A. Effectiveness of high-frequency transcutaneous electrical nerve stimulation at tender points as adjuvant therapy for patients with fibromyalgia. *European journal of physical and rehabilitation medicine* 2013; **49**(2): 197-204.
21. Chao A-S, Chao A, Wang T-H, et al. Pain relief by applying transcutaneous electrical nerve stimulation (TENS) on acupuncture points during the first stage of labor: A randomized double-blind placebo-controlled trial. *Pain* 2007; **127**(3): 214-20.
22. Chee EK, Walton H. Treatment of trigger points with microamperage transcutaneous electrical nerve stimulation (TENS)--(the Electro-Acuscope 80). *Journal of manipulative and physiological therapeutics* 1986; **9**(2): 131-4.
23. Cheing GL, Hui-Chan CW. Would the addition of TENS to exercise training produce better physical performance outcomes in people with knee osteoarthritis than either intervention alone? *Clinical rehabilitation* 2004; **18**(5): 487-97.
24. Chen WL, Hsu WC, Lin YJ, Hsieh LF. Comparison of intra-articular hyaluronic acid injections with transcutaneous electric nerve stimulation for the management of knee osteoarthritis: a randomized controlled trial. *Archives of physical medicine and rehabilitation* 2013; **94**(8): 1482-9.
25. Chen MY, Pu QQ, Liu SY, Jiang ZY. [Efficacy comparison of different stimulation therapies for peri-arthritis of shoulder]. *Zhongguo zhen jiu = Chinese acupuncture & moxibustion* 2013; **33**(2): 109-12.
26. Chen YQ, Wu WL, Yao YS, Yang Y, Zhao QY, Qiu LC. Transcutaneous electric acupoint stimulation at Jiaji points reduce abdominal pain after colonoscopy: a randomized controlled trial. *International Journal of Clinical and Experimental Medicine* 2015; **8**(4): 5972-7.
27. Chen YQ, Yao YS, Wu YH, Dai DS, Zhao QY, Qiu LC. Transcutaneous electric acupoint stimulation alleviates remifentanyl-induced hyperalgesia in patients undergoing thyroidectomy: a randomized controlled trial. *International Journal of Clinical and Experimental Medicine* 2015; **8**(4): 5781-7.
28. Chen YQ, Yang Y, Yao YS, Dai DS, Qian B, Liu PP. Does transcutaneous electric acupoint stimulation improve the quality of recovery after thyroidectomy? A prospective randomized controlled trial. *International Journal of Clinical and Experimental Medicine* 2015; **8**(8): 13622-7.
29. Chen J, Zhang Y, Li X, et al. Efficacy of transcutaneous electrical acupoint stimulation combined with general anesthesia for sedation and postoperative analgesia in minimally invasive lung cancer surgery: a randomized, double-blind, placebo-controlled trial. *Thoracic cancer* 2020.
30. Cheng RSS, Pomeranz B. Electrotherapy of chronic musculoskeletal pain: Comparison of electroacupuncture and acupuncture-like transcutaneous electrical nerve stimulation. *Clinical Journal of Pain* 1986; **2**(3): 143-9.
31. Chiu JH, Chen WS, Chen CH, et al. Effect of transcutaneous electrical nerve stimulation for pain relief on patients undergoing hemorrhoidectomy: prospective, randomized, controlled trial. *Diseases of the colon and rectum* 1999; **42**(2): 180-5.
32. Coletta R, Maggiolo F, Di Tizio S. Etofenamate and transcutaneous electrical nerve stimulation treatment of painful spinal syndromes. *International journal of clinical pharmacology research* 1988; **8**(4): 295-8.
33. Conn IG, Marshall AH, Yadav SN, Daly JC, Jaffer M. Transcutaneous electrical nerve stimulation following appendicectomy: the placebo effect. *Annals of the Royal College of Surgeons of England* 1986; **68**(4): 191-2.
34. Cornell P, Lopez A, Malofsky H. Pain reduction with transcutaneous electrical nerve stimulation after foot surgery. *J Foot Surg* 1984; **23**(4): 326-33.
35. Demidas A, Zarzycki M. Touch and Pain Sensations in Diadynamic Current (DD) and Transcutaneous Electrical Nerve Stimulation (TENS): A Randomized Study. *Biomed Research International* 2019; **2019**: 9073073.
36. Duzyj CM, Simonds A, Jones I, Hill JM, Khan S, Parrott JS. 281: transcutaneous electrical nerve stimulation to reduce pain and opioid use after cesarean: a pilot study. *American journal of obstetrics and gynecology* 2020; **222**(1): S190-.
37. Dodick DW, Lipton RB, Goadsby PJ, et al. Predictors of Migraine Headache Recurrence: A Pooled Analysis From the Eletriptan Database. *Headache: The Journal of Head & Face Pain* 2008; **48**(2): 184-93.
38. Eidy M, Fazel MR, Janzamani M, Rezaei MH, Moravveji AR. Preemptive Analgesic Effects of Transcutaneous Electrical Nerve Stimulation (TENS) on Postoperative Pain: A Randomized, Double-Blind, Placebo-Controlled Trial. *Iranian Red Crescent Medical Journal* 2016; **18**(4).



## 10\_OL-TABLE3\_ExcludedStudies

- 1  
2 39. Ertzgaard P, Alwin J, Sorbo A, Lindgren M, Sandsjo L. Evaluation of a self-administered transcutaneous electrical stimulation concept for the treatment of spasticity: a randomized  
3 placebo-controlled trial. *European journal of physical and rehabilitation medicine* 2018; **54**(4): 507-17.
- 4 40. Fagade OO, Obilade TO. Therapeutic effect of TENS on post-IMF trismus and pain. *African journal of medicine and medical sciences* 2003; **32**(4): 391-4.
- 5 41. Fargas-Babjak A, Rooney P, Gerecz E. Randomized trial of Codetron for pain control in osteoarthritis of the hip/knee. *Clinical journal of pain* 1989; **5**(2): 137-41.
- 6 42. Fargas-Babjak AM, Pomeranz B, Rooney PJ. Acupuncture-like stimulation with codetron for rehabilitation of patients with chronic pain syndrome and osteoarthritis. *Acupuncture &*  
7 *electro-therapeutics research* 1992; **17**(2): 95-105.
- 8 43. Fary RE, Carroll GJ, Briffa TG, Briffa NK. The effectiveness of pulsed electrical stimulation in the management of osteoarthritis of the knee: results of a double-blind, randomized,  
9 placebo-controlled, repeated-measures trial. *Arthritis Rheum* 2011; **63**(5): 1333-42.
- 10 44. Fletcher-Smith JC, Walker DM, Allatt K, et al. The ESCAPS study: a feasibility randomized controlled trial of early electrical stimulation to the wrist extensors and flexors to prevent  
11 post-stroke complications of pain and contractures in the paretic arm. *Clinical rehabilitation* 2019; **33**(12): 1919-30.
- 12 45. Gadsby JG, Franks A, Jarvis P, Dewhurst F. Acupuncture-like transcutaneous electrical nerve stimulation within palliative care: a pilot study. *Complementary therapies in medicine*  
13 1997; **5**(1): 13-8.
- 14 46. Gao YQ, Jia Q, Xie S, et al. Clinical Trials for Thyroidectomy Under Acupuncture-aided Anesthesia by Using Electroacupuncture or Transcutaneous Acupoint Electrical Stimulation  
15 of Different Acupoints. *Zhen ci yan jiu = Acupuncture research* 2017; **42**(4): 332-7.
- 16 47. Garaud T, Gervais C, Szekely B, et al. Randomized study of the impact of a therapeutic education program on patients suffering from chronic low-back pain who are treated with  
17 transcutaneous electrical nerve stimulation. *Medicine* 2018; **97**(52): e13782-e.
- 18 48. Garland D, Holt P, Harrington JT, Caldwell J, Zizic T, Cholewczynski J. A 3-month, randomized, double-blind, placebo-controlled study to evaluate the safety and efficacy of a  
19 highly optimized, capacitively coupled, pulsed electrical stimulator in patients with osteoarthritis of the knee. *Osteoarthritis and cartilage* 2007; **15**(6): 630-7.
- 20 49. Gaul C, Diener HC, Silver N, et al. Non-invasive vagus nerve stimulation for PREvention and Acute treatment of chronic cluster headache (PREVA): A randomised controlled study.  
21 *Cephalalgia* 2016; **36**(6): 534-46.
- 22 50. Geirsson G, Wang Y, Lindstrom S, Fall M. Traditional acupuncture and electrical stimulation of the posterior tibial nerve. A trial in chronic interstitial cystitis. *Scand J Urol Nephrol*  
23 1993; **27**(1): 67-70.
- 24 51. Ghoname EA, Craig WF, White PF, et al. Effectiveness of PENS for lower back pain. *Integrative Medicine* 1999; **2**(1): 19-21.
- 25 52. Gokce AH, Gokce FS. Effects of bilateral transcutaneous tibial nerve stimulation on constipation severity in geriatric patients: A prospective clinical study. *Geriatrics & Gerontology*  
26 *International* 2020; **20**(2): 101-5.
- 27 53. Gottfried AC, Adler EP, Fernandez-Becker N, Clarke JO, Habtezion A, Nguyen LAB. Transcutaneous vagal nerve stimulation improves symptoms and gastric emptying in patients  
28 with idiopathic gastroparesis. *Gastroenterology* 2019; **156**(6): S-789-S-90.
- 29 54. Govil M, Mukhopadhyay N, Holwerda T, Sluka K, Rakel B, Schutte DL. Effects of genotype on TENS effectiveness in controlling knee pain in persons with mild to moderate  
30 osteoarthritis. *European Journal of Pain* 2020; **24**(2): 398-412.
- 31 55. Gu S, Lang H, Gan J, Zheng Z, Zhao F, Tu Q. Effect of transcutaneous electrical acupoint stimulation on gastrointestinal function recovery after laparoscopic radical gastrectomy – A  
32 randomized controlled trial. *European journal of integrative medicine* 2019; **26**: 11-7.
- 33 56. Gorodetskiy IG, Gorodnichenko AI, Tursin PS, Reshetnyak VK, Uskov ON. Non-invasive interactive neurostimulation in the post-operative recovery of patients with a trochanteric  
34 fracture of the femur: a randomised, controlled trial. *Journal of Bone & Joint Surgery, British Volume* 2007; **89**(11): 1488-94.
- 35 57. Harrison R, Shore M, Woods T, Mathews G, Gardiner J, Unwin A. A comparative study of transcutaneous electrical nerve stimulation (TENS), entonox, pethidine + promazine and  
36 lumbar epidural for pain relief in labor. *Acta obstetricia et gynecologica Scandinavica* 1987; **66**(1): 9-14.
- 37 58. Hedner N, Milsom I, Eliasson T, Mannheimer C. [TENS is effective in painful menstruation]. *Lakartidningen* 1996; **93**(13): 1219-22.
- 38 59. Herman E, Williams R, Stratford P, Fargas-Babjak A, Trott M. A randomized controlled trial of transcutaneous electrical nerve stimulation (CODETRON) to determine its benefits in  
39 a rehabilitation program for acute occupational low back pain. *Spine* 1994; **19**(5): 561-8.
- 40 60. Hettrick HH, O'Brien K, Laznick H, et al. Effect of transcutaneous electrical nerve stimulation for the management of burn pruritus: a pilot study. *The Journal of burn care &*  
41 *rehabilitation* 2004; **25**(3): 236-40.
- 42 61. Hsieh CYJ, Phillips RB, Adams AH, Pope MH. First prize: Functional outcomes of low back pain: Comparison of four treatment groups in a randomized controlled trial. *Journal of*  
43 *manipulative and physiological therapeutics* 1992; **15**(1): 4-9.
- 44  
45  
46

## 10\_OL-TABLE3\_ExcludedStudies

62. Pope MH, Phillips RB, Haugh LD, Hsieh CY, MacDonald L, Haldeman S. A prospective randomized three-week trial of spinal manipulation, transcutaneous muscle stimulation, massage and corset in the treatment of subacute low back pain. *Spine* 1994; **19**(22): 2571-7.
63. Huang S, Peng W, Tian X, et al. Effects of transcutaneous electrical acupoint stimulation at different frequencies on perioperative anesthetic dosage, recovery, complications, and prognosis in video-assisted thoracic surgical lobectomy: a randomized, double-blinded, placebo-controlled trial. *Journal of anesthesia* 2017; **31**(1): 58-65.
64. Huang W, Yu TY, Long WF, Xiao JB. [Application of Transcutaneous Electrical Acupoint Stimulation Combined with Transversus Abdominis Plane Block to Enhanced Recovery After Surgery in Patients Undergoing Laparoscopic Colorectal Cancer Resection: A Randomized Controlled Clinical Trial]. *Zhen ci yan jiu = Acupuncture research* 2018; **43**(10): 611-5.
65. Huang Y, Bian WW, Hou LL. [Effects of transcutaneous electrical acupoint stimulation on pain of patients in expansion process of skin soft tissue dilator on forehead by water injection]. *Zhonghua shao shang za zhi = Zhonghua shaoshang zazhi = Chinese journal of burns* 2019; **35**(3): 193-7.
66. Ing MR, Hellreich PD, Johnson DW, Chen JJ. Transcutaneous electrical nerve stimulation for chronic post-herpetic neuralgia. *International journal of dermatology* 2015; **54**(4): 476-80.
67. Isсенman J, Nolan M, Rowley J, Hobby R. Transcutaneous electrical nerve stimulation for pain control after spinal fusion with Harrington rods. A clinical report. *Physical therapy* 1985; **65**(10): 1517-20.
68. Itoh K, Hirota S, Katsumi Y, Ochi H, Kitakoji H. A pilot study on using acupuncture and transcutaneous electrical nerve stimulation (TENS) to treat knee osteoarthritis (OA). *Chin Med* 2008; **3**: 2.
69. Itoh K, Itoh S, Katsumi Y, Kitakoji H. A pilot study on using acupuncture and transcutaneous electrical nerve stimulation to treat chronic non-specific low back pain. *Complementary therapies in clinical practice* 2009; **15**(1): 22-5.
70. Jardim P. Transcutaneous electrical nerve stimulation for non-acute low back pain: a randomized double-blind study of conventional, nu-waveform, acupuncture-type and sham therapies. Annual Meeting, American Academy of Orthopaedic Surgeons, 1997; 1997; 1997.
71. Jeans M. Relief of chronic pain by brief, intense transcutaneous electrical stimulation - a double blind study. In: Bonica J, Liebeskind J, Albe-Fessard D, eds. *Advances in Pain Research and Therapy*. New York: Raven Press; 1979: 601-6.
72. Jiang L, Yuan DL, Li M, et al. Combination of flunarizine and transcutaneous supraorbital neurostimulation improves migraine prophylaxis. *Acta Neurologica Scandinavica* 2019; **139**(3): 276-83.
73. Juárez-Albuixech ML, Redondo-González O, Tello I, Collado-Vázquez S, Jiménez-Antona C. Vojta Therapy versus transcutaneous electrical nerve stimulation for lumbosciatica syndrome: A quasi-experimental pilot study. *Journal of Bodywork & Movement Therapies* 2020; **24**(1): 39-46.
74. Jünger M, Arnold A, Zuder D, Stahl HW, Heising S. Local therapy and treatment costs of chronic, venous leg ulcers with electrical stimulation (Dermapulse): a prospective, placebo controlled, double blind trial. *Wound repair and regeneration* 2008; **16**(4): 480-7.
75. Kaplan B, Peled Y, Pardo J, et al. Transcutaneous electrical nerve stimulation (TENS) as a relief for dysmenorrhea. *Clinical and Experimental Obstetrics and Gynecology* 1994; **21**(2): 87-90.
76. Katz J, Melzack R. Auricular transcutaneous electrical nerve stimulation (TENS) reduces phantom limb pain. *Journal of pain and symptom management* 1991; **6**(2): 73-83.
77. Kempf K, Rohling M, Darwish E, et al. High-tone external muscle stimulation for the treatment of chronic sciatica - A randomized controlled crossover trial. *Open Pain Journal* 2018; **11**(1): 21-30.
78. Kho HG, Eijk RJ, Kapteijns WM, van Egmond J. Acupuncture and transcutaneous stimulation analgesia in comparison with moderate-dose fentanyl anaesthesia in major surgery. Clinical efficacy and influence on recovery and morbidity. *Anaesthesia* 1991; **46**(2): 129-35.
79. Kocyigit F, Akalin E, Gezer NS, Orbay O, Kocyigit A, Ada E. Functional magnetic resonance imaging of the effects of low-frequency transcutaneous electrical nerve stimulation on central pain modulation: a double-blind, placebo-controlled trial. *The Clinical journal of pain* 2012; **28**(7): 581-8.
80. Kolen AF, de Nijs RN, Wagemakers FM, Meier AJ, Johnson MI. Effects of spatially targeted transcutaneous electrical nerve stimulation using an electrode array that measures skin resistance on pain and mobility in patients with osteoarthritis in the knee: a randomized controlled trial. *Pain* 2012; **153**(2): 373-81.
81. Kolu E, Buyukavci R, Akturk S, Eren F, Ersoy Y. Comparison of high-intensity laser therapy and combination of transcutaneous nerve stimulation and ultrasound treatment in patients with chronic lumbar radiculopathy: A randomized single-blind study. *Pakistan Journal of Medical Sciences* 2018; **34**(3): 530-4.
82. Koo CC, Lin RS, Wang TG, et al. Novel Noxipoint Therapy versus Conventional Physical Therapy for Chronic Neck and Shoulder Pain: Multicentre Randomised Controlled Trials. *Scientific reports* 2015; **5**: 16342.
83. Kumar D, Marshall HJ. Diabetic peripheral neuropathy: amelioration of pain with transcutaneous electrostimulation. *Diabetes care* 1997; **20**(11): 1702-5.



## 10\_OL-TABLE3\_ExcludedStudies

- 1  
2 84. Kumar D, Alvaro MS, Julka IS, Marshall HJ. Diabetic peripheral neuropathy. Effectiveness of electrotherapy and amitriptyline for symptomatic relief. *Diabetes Care* 1998; **21**(8):  
3 1322-5.
- 4 85. Labrunée M, Boned A, Granger R, et al. Improved Walking Claudication Distance with Transcutaneous Electrical Nerve Stimulation: an Old Treatment with a New Indication in  
5 Patients with Peripheral Artery Disease. *American journal of physical medicine & rehabilitation* 2015; **94**(11): 941-9.
- 6 86. Lan F, Ma YH, Xue JX, Wang TL, Ma DQ. Transcutaneous electrical nerve stimulation on acupoints reduces fentanyl requirement for postoperative pain relief after total hip  
7 arthroplasty in elderly patients. *Minerva anesthesiologica* 2012; **78**(8): 887-95.
- 8 87. Lanham RH, Powell S, Hendrix BE. Efficacy of hypothermia and transcutaneous electrical nerve stimulation in podiatric surgery. *J Foot Surg* 1984; **23**  
9 (2): 152-8.
- 10 88. Lee JC, Lin DT, Hong CZ. The effectiveness of simultaneous thermotherapy with ultrasound and electrotherapy with combined AC and DC current on the immediate pain relief of  
11 myofascial trigger points. *Journal of Musculoskeletal Pain* 1997; **5**(1): 81-90.
- 12 89. Lee B, Hong SH, Kim K, et al. Efficacy of the device combining high-frequency transcutaneous electrical nerve stimulation and thermotherapy for relieving primary dysmenorrhea: a  
13 randomized, single-blind, placebo-controlled trial. *European journal of obstetrics, gynecology, and reproductive biology* 2015; **194**: 58-63.
- 14 90. Lehmann TR, Russell DW, Spratt KF. The impact of patients with nonorganic physical findings on a controlled trial of transcutaneous electrical nerve stimulation and  
15 electroacupuncture. *Spine* 1983; **8**(6): 625-34.
- 16 91. Lehmann TR, Russell DW, Spratt KF, et al. Efficacy of electroacupuncture and TENS in the rehabilitation of chronic low back pain patients. *Pain* 1986; **26**(3): 277-90.
- 17 92. Lerma K, Goldthwaite LM, Blumenthal PD, Shaw KA. Transcutaneous electrical nerve stimulation (TENS) for pain control during first-trimester abortion: A single-blinded  
18 randomized controlled trial. *Contraception* 2020; **101**(5): 357.
- 19 93. Li M, Xu F, Liu M, Li Y, Lin L, Chen J. Promoting effects and autonomic mechanisms of transcutaneous electrical acustimulation on the postoperative recovery after caesarian  
20 section *Gastroenterology* 2019; **156**(6): S-584-S-5.
- 21 94. Lin Y, Yang W, Li Y, et al. Mechanism of acupoint transcutaneous electric stimulation on analgesic anesthesia in the patients undergoing general anesthesia anorectal operation.  
22 *Zhongguo zhen jiu [Chinese acupuncture & moxibustion]* 2017; **37**(7): 747-52.
- 23 95. Liu X, Li S, Wang B, An L, Ren X, Wu H. Intraoperative and postoperative anaesthetic and analgesic effect of multipoint transcutaneous electrical acupuncture stimulation combined  
24 with sufentanil anaesthesia in patients undergoing supratentorial craniotomy. *Acupuncture in medicine : journal of the British Medical Acupuncture Society* 2015; **33**(4): 270-6.
- 25 96. Loeser J, Black R, Christman A. Relief of pain by transcutaneous electrical nerve stimulation. *Journal of neurosurgery* 1975; **42**: 308-14.
- 26 97. Lone AR, Wafai ZA, Buth BA, Wani TA, Koul PA, Khan SH. Analgesic efficacy of transcutaneous electrical nerve stimulation compared with diclofenac sodium in osteo-arthritis of  
27 the knee. *Physiotherapy* 2003; **89**(8): 478-85.
- 28 98. Lorenzana FD. A randomized controlled trial of the efficacy of transcutaneous electrical nerve stimulation (TENS) versus lidocaine in the relief of episiotomy pain. *Philippine journal*  
29 *of obstetrics & gynecology : official publication, Philippine Obstetrical and Gynecological Society* 1999; **23**(4): 135-42.
- 30 99. Lv Y, He H, Xie J, et al. Effects of transcutaneous acupoint electrical stimulation combined with low-dose sufentanil pretreatment on the incidence and severity of etomidate-induced  
31 myoclonus: a randomized controlled trial. *Medicine* 2018; **97**(23): e10969.
- 32 100. Macdonald AJR, Coates TW. The discovery of transcutaneous spinal electroanalgesia and its relief of chronic pain. *Physiotherapy* 1995; **81**(11): 653-61.
- 33 101. Malmir K, Ghotbi N, Mir SM, Moradi B. Comparing effects of cryotherapy and transcutaneous electrical nerve stimulation on signs and symptoms of delayed onset muscle soreness  
34 in amateur athletes. *Open Pain Journal* 2017; **10**: 73-80.
- 35 102. Maria Fernandez-Seguín L, Marcos Heredia-Rizo A, Antonio Diaz-Mancha J, Gonzalez-Garcia P, Ramos-Ortega J, Munuera-Martinez PV. Immediate and short-term radiological  
36 changes after combining static stretching and transcutaneous electrical stimulation in adults with cavus foot A randomized controlled trial. *Medicine* 2019; **98**(46): e18018.
- 37 103. Matsuse H, Segal NA, Rabe KG, Shiba N. The Effect of Neuromuscular Electrical Stimulation During Walking on Muscle Strength and Knee Pain in Obese Women With Knee Pain:  
38 A Randomized Controlled Trial. *American journal of physical medicine & rehabilitation* 2020; **99**(1): 56-64.
- 39 104. McGough JJ, Sturm A, Cowen J, et al. Double-Blind, Sham-Controlled, Pilot Study of Trigeminal Nerve Stimulation for mumm. *Journal of the American Academy of Child and*  
40 *Adolescent Psychiatry* 2019; **58**(4): 403-11.e3.
- 41 105. Meade CS, Lukas SE, McDonald LJ, et al. A randomized trial of transcutaneous electric acupoint stimulation as adjunctive treatment for opioid detoxification. *Journal of substance*  
42 *abuse treatment* 2010; **38**(1): 12-21.

## 10\_OL-TABLE3\_ExcludedStudies

106. Meechan JG, Gowans AJ, Welbury RR. The use of patient-controlled transcutaneous electronic nerve stimulation (TENS) to decrease the discomfort of regional anaesthesia in dentistry: a randomised controlled clinical trial. *Journal of dentistry* 1998; **26**(5-6): 417-20.
107. Melzack R. Prolonged relief of pain by brief, intense transcutaneous somatic stimulation. *Pain* 1975; **1**(4): 357-73.
108. Melzack R, Jeans ME, Stratford JG, Monks RC. Ice massage and transcutaneous electrical stimulation: comparison of treatment for low-back pain. *Pain* 1980; **9**(2): 209-17.
109. Mi Z, Gao J, Chen X, Ge Y, Lu K. [Effects of transcutaneous electrical acupoint stimulation on quality of recovery during early period after laparoscopic cholecystectomy]. *Zhongguo zhen jiu = Chinese acupuncture & moxibustion* 2018; **38**(3): 256-60.
110. Miller Jones CM. Transcutaneous nerve stimulation in labour. *Anaesthesia* 1980; **35**(4): 372-5.
111. Monaco A, Sgolastra F, Pietropaoli D, Giannoni M, Cattaneo R. Comparison between sensory and motor transcutaneous electrical nervous stimulation on electromyographic and kinesigraphic activity of patients with temporomandibular disorder: a controlled clinical trial. *BMC musculoskeletal disorders* 2013; **14**.
112. Mucuk S, Baser M. Effects of noninvasive electroacupuncture on labour pain and duration. *Journal of clinical nursing* 2014; **23**(11-12): 1603-10.
113. Mummolo S Dds P, Nota A Dds P, Tecco S, et al. Ultra-low-frequency transcutaneous electric nerve stimulation (ULF-TENS) in subjects with craniofacial pain: A retrospective study. *Cranio : the journal of craniomandibular practice* 2018; 1-6.
114. Murina F, Bernorio R, Palmiotto R. The use of amielle vaginal trainers as adjuvant in the treatment of vestibulodynia: An observational multicentric study. *MedGenMed Medscape General Medicine* 2008; **10** (1) (no pagination)(23).
115. Murina F, Felice R, Di Francesco S, Oneda S. Vaginal diazepam plus transcutaneous electrical nerve stimulation to treat vestibulodynia: A randomized controlled trial. *European journal of obstetrics, gynecology, and reproductive biology* 2018; **228**: 148-53.
116. Mysliwiec A, Saulicz E, Kuszewski M, Kokosz M, Wolny T. Assessment of the influence of Saunders traction and transcutaneous electrical nerve stimulation on hand grip force in patients with neck pain. *Ortopedia, traumatologia, rehabilitacja* 2011; **13**(1): 37-44.
117. Naeser MA, Hahn KA, Lieberman BE, Branco KF. Carpal tunnel syndrome pain treated with low-level laser and microamperes transcutaneous electric nerve stimulation: a controlled study. *Archives of physical medicine and rehabilitation* 2002; **83**(7): 978-88.
118. Nakano J, Ishii K, Fukushima T, et al. Effects of transcutaneous electrical nerve stimulation on physical symptoms in advanced cancer patients receiving palliative care. *International Journal of Rehabilitation Research* 2020; **43**(1): 62-8.
119. Ngai SPC, Jones AYM, Hui-Chan CWY, Ko FWS, Hui DSC. Effect of 4 weeks of Acu-TENS on functional capacity and beta-endorphin level in subjects with chronic obstructive pulmonary disease: A randomized controlled trial. *Respiratory Physiology & Neurobiology* 2010; **173**(1): 29-36.
120. Noehren B, Dailey DL, Rakel BA, et al. Effect of transcutaneous electrical nerve stimulation on pain, function, and quality of life in fibromyalgia: a double-blind randomized clinical trial. *Physical therapy* 2015; **95**(1): 129-40.
121. Nourbakhsh MR, Fearon FJ. An alternative approach to treating lateral epicondylitis. A randomized, placebo-controlled, double-blinded study. *Clinical rehabilitation* 2008; **22**(7): 601-9.
122. Okonkwo UP, Ibeneme SC, Ihegihu EY, et al. Effects of transcutaneous electrical nerve stimulation in the Management of Post-Injection Sciatic Pain in a non-randomized controlled clinical trial in Nnewi, Nigeria. *BMC complementary and alternative medicine* 2018; **18**.
123. Oyibo SO, Breislin K, Boulton AJM. Electrical stimulation therapy through stocking electrodes for painful diabetic neuropathy: A double blind, controlled crossover study. *Diabetic Medicine* 2004; **21**(8): 940-4.
124. Ozen S, Cosar SNS, Cabioglu MT, Cetin N. A Comparison of Physical Therapy Modalities Versus Acupuncture in the Treatment of Fibromyalgia Syndrome: A Pilot Study. *Journal of Alternative and Complementary Medicine* 2019; **25**(3): 296-304.
125. Park J, Seo D, Choi W, Lee SW. The effects of exercise with TENS on spasticity, balance, and gait in patients with chronic stroke: A randomized controlled trial. *Medical Science Monitor* 2014; **20**: 1890-6.
126. Patel JI, Kumar BNP, Ravish VN. EFFECT OF MCKENZIE METHOD WITH TENS ON LUMBAR RADICULOPATHY - A RANDOMIZED CONTROLLED TRIAL. *International Journal of Physiotherapy* 2016; **3**(1): 94-9.
127. Peng T, Li XT, Zhou SF, Xiong Y, Kang Y, Cheng HD. Transcutaneous Electrical Nerve Stimulation on Acupoints Relieves Labor Pain: A Non-randomized Controlled Study. *Chinese Journal of Integrative Medicine* 2010; **16**(3): 234-8.
128. Polat CS, Dogan A, Ozcan DS, Koseoglu BF, Akselim SK, Onat SS. The Effectiveness of Transcutaneous Electrical Nerve Stimulation in Knee Osteoarthritis with Neuropathic Pain Component: A Randomized Controlled Study. *Turk Osteoporoz Dergisi-Turkish Journal of Osteoporosis* 2017; **23**(2): 47-51.

## 10\_OL-TABLE3\_ExcludedStudies

- 1  
2 129. Pope M, Phillips R, Haugh L, Hsieh C, MacDonald L, Haldeman S. A prospective randomized three-week trial of spinal manipulation, transcutaneous muscle stimulation, massage  
3 and corset in the treatment of subacute low back pain. *Spine* 1994; **19**(22): 2571-7.
- 4 130. Pour NH, Kaviani M, Razeghi M. Comparison of effect of transcutaneous electrical nerve stimulation and acupressure in decreasing labor pain in primiparous women. [Persian].  
5 *Iranian Journal of Obstetrics, Gynecology and Infertility* 2012; **15**(12): 27-33.
- 6 131. Quinton DN, Sloan JP, Theakstone J. Transcutaneous electrical nerve stimulation in acute hand infections. *Journal of hand surgery (Edinburgh, Scotland)* 1987; **12**(2): 267-8.
- 7 132. Radhakrishna N, Rajagopalan V, Chouhan RS, Singh S, MP P. Effect of Preoperative Transcutaneous Electrical Nerve Stimulation on Intraoperative Anesthetic Drug Consumption  
8 and Pain Scores in Patients Undergoing Lumbar Discectomy under General Anesthesia. *Indian J Pain* 2020; **34**: 22-6.
- 9 133. Rapoport AM, Bonner JH, Lin T, et al. Remote electrical neuromodulation (REN) in the acute treatment of migraine: a comparison with usual care and acute migraine medications.  
10 *Journal of Headache & Pain* 2019; **20**(1): N.PAG.
- 11 134. Razavi M, Jansen GB. Effects of acupuncture and placebo TENS in addition to exercise in treatment of rotator cuff tendinitis. *Clinical rehabilitation* 2004; **18**(8): 872-8.
- 12 135. Reich BA. Non-invasive treatment of vascular and muscle contraction headache: a comparative longitudinal clinical study. *Headache* 1989; **29**(1): 34-41.
- 13 136. Reichstein L, Labrenz S, Ziegler D, Martin S. Effective treatment of symptomatic diabetic polyneuropathy by high-frequency external muscle stimulation. *Diabetologia* 2005; **48**(5):  
14 824-8.
- 15 137. Rodriguez-Fernandez AL, Garrido-Santofimia V, Geita-Rodriguez J, Fernandez-De-Las-Peas C. Effects of burst-type transcutaneous electrical nerve stimulation on cervical range of  
16 motion and latent myofascial trigger point pain sensitivity. *Archives of physical medicine and rehabilitation* 2011; **92**(9): 1353-8.
- 17 138. Rooney SM, Jain S, McCormack P, Bains MS, Martini N, Goldiner PL. A comparison of pulmonary function tests for postthoracotomy pain using cryoanalgesia and transcutaneous  
18 nerve stimulation. *Annals of Thoracic Surgery* 1986; **41**(2): 204-7.
- 19 139. Roth PM, Thrash WJ. Effect of transcutaneous electrical nerve stimulation for controlling pain associated with orthodontic tooth movement. *American journal of orthodontics and*  
20 *dentofacial orthopedics : official publication of the American Association of Orthodontists, its constituent societies, and the American Board of Orthodontics* 1986; **90**(2): 132-8.
- 21 140. Santiesteban AJ, Burnham TL, George KL. Primary spasmodic dysmenorrhea: The use of TENS on acupuncture points. *American Journal of Acupuncture* 1985; **13**(1): 35-42.
- 22 141. Sari Z, Aydoğdu O, Demirbüken İ, Yurdalan SU, Polat MG. A Better Way to Decrease Knee Swelling in Patients with Knee Osteoarthritis: a Single-Blind Randomised Controlled  
23 Trial. *Pain research & management* 2019; **2019**: 8514808.
- 24 142. Schuster GD, Infante MC. Pain relief after low back surgery: the efficacy of transcutaneous electrical nerve stimulation. *Pain* 1980; **8**(3): 299-302.
- 25 143. Schoenen J, Jensen RH, Lantéri-Minet M, et al. Stimulation of the sphenopalatine ganglion (SPG) for cluster headache treatment. Pathway CH-1: a randomized, sham-controlled  
26 study. *Cephalalgia* 2013; **33**(10): 816-30.
- 27 144. Schomburg F, Carter-Baker S. Transcutaneous electrical nerve stimulation for postlaparotomy pain. *Physical therapy* 1983; **63**(2): 188-93.
- 28 145. Selfe TK, Bourguignon C, Taylor AG. Effects of noninvasive interactive neurostimulation on symptoms of osteoarthritis of the knee: a randomized, sham-controlled pilot study.  
29 *Journal of alternative and complementary medicine (New York, NY)* 2008; **14**(9): 1075-81.
- 30 146. Shirazi ZR, Shafae R, Abbasi L. The effects of transcutaneous electrical nerve stimulation on joint position sense in patients with knee joint osteoarthritis. *Physiotherapy theory and*  
31 *practice* 2014; **30**(7): 495-9.
- 32 147. Silberstein SD, Mechtler LL, Kudrow DB, et al. Non-Invasive Vagus Nerve Stimulation for the ACute Treatment of Cluster Headache: Findings From the Randomized, Double-  
33 Blind, Sham-Controlled ACT1 Study. 2016; **56**(8): 1317-32.
- 34 148. Silberstein SD, Calhoun AH, Lipton RB, et al. Chronic migraine headache prevention with noninvasive vagus nerve stimulation: The EVENT study. *Neurology* 2016; **87**(5): 529-38.
- 35 149. Simon CB, Riley JL, Fillingim RB, Bishop MD, George SZ. Age Group Comparisons of TENS Response Among Individuals With Chronic Axial Low Back Pain. *Journal of Pain*  
36 2015; **16**(12): 1268-79.
- 37 150. Simpson KH, Ward J. A randomized, double-blind, crossover study of the use of transcutaneous spinal electroanalgesia in patients with pain from chronic critical limb ischemia.  
38 *Journal of pain and symptom management* 2004; **28**(5): 511-6.
- 39 151. Solomon S, Guglielmo KM. Treatment of headache by transcutaneous electrical stimulation. *Headache* 1985; **25**(1): 12-5.
- 40 152. Solomon S, Elkind A, Freitag F, et al. Safety and effectiveness of cranial electrotherapy in the treatment of tension headache. *Headache* 1989; **29**(7): 445-50.
- 41 153. Sonde L, Kalimo H, Fernaeus SE, Viitanen M. Low TENS treatment on post-stroke paretic arm: a three-year follow-up. *Clinical rehabilitation* 2000; **14**(1): 14-9.
- 42 154. Stralka SW, Jackson JA, Lewis AR. Treatment of hand and wrist pain: A randomized clinical trial of high voltage pulsed, direct current built into a wrist splint. *AAOHN Journal* 1998;  
43 **46**(5): 233-6.

## 10\_OL-TABLE3\_ExcludedStudies

- 1  
2 155. Stratton S, Smith M. Postoperative thoracotomy. Effect of transcutaneous electrical nerve stimulation on forced vital capacity. *Physical therapy* 1980; **60**(1): 45-7.
- 3 156. Strayhorn G. Transcutaneous electrical nerve stimulation and postoperative use of narcotic analgesics. *J Natl Med Assoc* 1983; **75**(8): 811-6.
- 4 157. Sun K, Xing T, Zhang F, et al. Perioperative Transcutaneous Electrical Acupoint Stimulation for Postoperative Pain Relief Following Laparoscopic Surgery: A Randomized  
5 Controlled Trial. *The Clinical journal of pain* 2017; **33**(4): 340-7.
- 6 158. Sunshine W, Field TM, Quintino O, et al. Fibromyalgia benefits from massage therapy and transcutaneous electrical stimulation. *Journal of Clinical Rheumatology* 1996; **2**(1): 18-22.
- 7 159. Takla MKN, Rezk-Allah SS. Immediate Effects of Simultaneous Application of Transcutaneous Electrical Nerve Stimulation and Ultrasound Phonophoresis on Active Myofascial  
8 Trigger Points: A Randomized Controlled Trial. *American journal of physical medicine & rehabilitation* 2018; **97**(5): 332-8.
- 9 160. Takla MKN. Low-frequency high-intensity versus medium-frequency low-intensity combined therapy in the management of active myofascial trigger points: A randomized controlled  
10 trial. *Physiotherapy research international : the journal for researchers and clinicians in physical therapy* 2018; **23**(4): e1737.
- 11 161. Thiese MS, Hughes M, Biggs J. Electrical stimulation for chronic non-specific low back pain in a working-age population: a 12-week double blinded randomized controlled trial.  
12 *BMC musculoskeletal disorders* 2013; **14**: 117.
- 13 162. Thompson JW, Bower S, Tyrer SP. A double blind randomised controlled clinical trial on the effect of transcutaneous spinal electroanalgesia (TSE) on low back pain. *European  
14 journal of pain (London, England)* 2008; **12**(3): 371-7.
- 15 163. Tok F, Aydemir K, Peker F, Safaz I, Taskaynatan MA, Ozgul A. The effects of electrical stimulation combined with continuous passive motion versus isometric exercise on  
16 symptoms, functional capacity, quality of life and balance in knee osteoarthritis: Randomized clinical trial. *Rheumatology international* 2011; **31**(2): 177-81.
- 17 164. Tousignant-Laflamme Y, Laroche C, Beaulieu C, Bouchard AJ, Boucher S, Michaud-Létourneau M. A randomized trial to determine the duration of analgesia following a 15- and a  
18 30-minute application of acupuncture-like TENS on patients with chronic low back pain. *Physiotherapy theory and practice* 2017; **33**(5): 361-9.
- 19 165. Tu Q, Gan J, Shi J, Yu H, He S, Zhang J. Effect of transcutaneous electrical acupoint stimulation on postoperative analgesia after ureteroscopic lithotripsy: a randomized controlled  
20 trial. *Urolithiasis* 2019; **47**(3): 279-87.
- 21 166. Vance CG, Chimenti RL, Dailey DL, et al. Development of a method to maximize the transcutaneous electrical nerve stimulation intensity in women with fibromyalgia. *Journal of  
22 pain research* 2018; **11**: 2269-78.
- 23 167. VanderArk GD, McGrath KA. Transcutaneous electrical stimulation in treatment of postoperative pain. *American journal of surgery* 1975; **130**(3): 338-40.
- 24 168. Vincenti E, Cervellin A, Mega M. Comparative study between patients treated with transcutaneous electric stimulation and controls during labour. *Clin Exp Obstet Gynaecol* 1982; **9**:  
25 95-7.
- 26 169. Vinterberg H, Donde R, Andersen RB. Transcutaneous nerve-stimulation for relief of pain in patients with rheumatoid arthritis. *Ugeskrift for laeger* 1978; **140**(20): 1149-50.
- 27 170. Wang W, George S, Wilimas J. Transcutaneous electrical nerve stimulation treatment of sickle cell pain crises. *Acta haematologica* 1988; **80**(2): 99-102.
- 28 171. Wang B, Tang J, White PF, et al. Effect of the intensity of transcutaneous acupoint electrical stimulation on the postoperative analgesic requirement. *Anesthesia and analgesia* 1997;  
29 **85**(2): 406-13.
- 30 172. Wang B, Xiong X, Li WJJoCA. Study on Transcutaneous Electrical Nerve Stimulation (TENS) Applied to Acupoints for Relieving Labor Pain. 2007; **16**(1): 7.
- 31 173. Wang ZL, Chen LF, Zhu WM. Observation on the transient analgesic effect of abdominal acupuncture TENS on pain of neck, shoulder, loin and legs. [Chinese]. *Zhongguo zhen jiu =  
32 Chinese acupuncture & moxibustion* 2007; **27**(9): 657-9.
- 33 174. Wang K, Svensson P, Arendt-Nielsen L. Effect of acupuncture-like electrical stimulation on chronic tension-type headache: a randomized, double-blinded, placebo-controlled trial.  
34 *Clinical Journal of Pain* 2007; **23**(4): 316-22.
- 35 175. Wang JL, Ren QS, Shen CC, Xie WX, Zheng RX, Ni JW. [Effect of transcutaneous acupoint electrical stimulation on blood bioactive compounds involving cerebral injury during  
36 craniotomy]. *Zhen ci yan jiu = Acupuncture research* 2008; **33**(1): 26-30.
- 37 176. Wang ZX. Clinical observation on electroacupuncture at acupoints for treatment of senile radical sciatica. [Chinese]. *Zhongguo zhen jiu = Chinese acupuncture & moxibustion* 2009;  
38 **29**(2): 126-8.
- 39 177. Wang H, Xie Y, Zhang Q, et al. Transcutaneous electric acupoint stimulation reduces intra-operative remifentanyl consumption and alleviates postoperative side-effects in patients  
40 undergoing sinusotomy: a prospective, randomized, placebo-controlled trial. *British journal of anaesthesia* 2014; **112**(6): 1075-82.
- 41 178. Ward AR, Lucas-Toumbourou S, McCarthy B. A comparison of the analgesic efficacy of medium-frequency alternating current and TENS. *Physiotherapy* 2009; **95**(4): 280-8.
- 42 179. Wattrisse G, Leroy B, Dufosse F, Bui Huu Tai R. Transcutaneous electric stimulation of the brain: a comparative study of the effects of its combination with peridural anesthesia  
43 using bupivacaine-fentanyl during obstetrical analgesia. *Cahiers d'anesthesiologie* 1993; **41**(5): 489-95.



## 10\_OL-TABLE3\_ExcludedStudies

180. Weng CS, Shu SH, Chen CC, Tsai YS, Hu WC, Chang YH. The evaluation of two modulated frequency modes of acupuncture-like tens on the treatment of tennis elbow pain. *Biomedical Engineering - Applications, Basis and Communications* 2005; **17**(5): 236-42.
181. Whitehair VC, Chae J, Hisel T, Wilson RD. The effect of electrical stimulation on impairment of the painful post-stroke shoulder. *Topics in Stroke Rehabilitation* 2019; **26**(7): 544-7.
182. Wieselmann-Penkner K, Janda M, Lorenzoni M, Polansky R. A comparison of the muscular relaxation effect of TENS and EMG-biofeedback in patients with bruxism. *Journal of oral rehabilitation* 2001; **28**(9): 849-53.
183. Williams AE, Miller MM, Bartley EJ, McCabe KM, Kerr KL, Rhudy JL. Impairment of Inhibition of Trigeminal Nociception via Conditioned Pain Modulation in Persons with Migraine Headaches. *Pain Medicine* 2019; **20**(8): 1600-10.
184. Williams KM. Is TENS a Feasible Non-Pharmacologic Adjunctive Treatment for Post-operative Orthopedic Pain? *Pain Management Nursing* 2020; **21**(2): 219.
185. Wilson CM, Stanczak JF. Palliative Pain Management Using Transcutaneous Electrical Nerve Stimulation (TENS). *Rehabilitation Oncology* 2020; **38**(1): E1-E6.
186. Wong RKW, Jones GW, Sagar SM, Babjak AF, Whelan T. A phase I-II study in the use of acupuncture-like transcutaneous nerve stimulation in the treatment of radiation-induced xerostomia in head-and-neck cancer patients treated with radical radiotherapy. *International Journal of Radiation Oncology Biology Physics* 2003; **57**(2): 472-80.
187. Wong RK, James JL, Sagar S, et al. Phase 2 results from Radiation Therapy Oncology Group Study 0537: a phase 2/3 study comparing acupuncture-like transcutaneous electrical nerve stimulation versus pilocarpine in treating early radiation-induced xerostomia. *Cancer* 2012; **118**(17): 4244-52.
188. Wu LL, Su CH, Liu CF. Effects of noninvasive electroacupuncture at Hegu (LI4) and Sanyinjiao (SP6) acupoints on dysmenorrhea: a randomized controlled trial. *Journal of alternative and complementary medicine (New York, NY)* 2012; **18**(2): 137-42.
189. Xu G, Feng Y, Tang WZ, Lv ZW. Transcutaneous electrical nerve stimulation in combination with cobalamin injection for postherpetic neuralgia: a single-center randomized controlled trial. *American journal of physical medicine & rehabilitation / Association of Academic Physiatrists* 2014; **93**(4): 287-98.
190. Xie J, Chen LH, Ning ZY, et al. Effect of transcutaneous electrical acupoint stimulation combined with palonosetron on chemotherapy-induced nausea and vomiting: a single-blind, randomized, controlled trial. *Chinese journal of cancer* 2017; **36**(1): 6.
191. Yang G, Su YX, Guo YX. Acupuncture like transcutaneous electrical nerve stimulation (Tens) on knee osteoarthritis (KOA) with low pain: a pilot study. *International Journal of Clinical and Experimental Medicine* 2017; **10**(1): 1059-65.
192. Yang Y, Yim J, Choi W, Lee S. Improving slow-transit constipation with transcutaneous electrical stimulation in women: A randomized, comparative study. *Women & health* 2017; **57**(4): 494-507.
193. Yao Y, Zhao Q, Gong C, et al. Transcutaneous Electrical Acupoint Stimulation Improves the Postoperative Quality of Recovery and Analgesia after Gynecological Laparoscopic Surgery: A Randomized Controlled Trial. *Evid Based Complement Alternat Med* 2015; **2015**: 324360.
194. Yarnitsky D, Volokh L, Ironi A, et al. Nonpainful remote electrical stimulation alleviates episodic migraine pain. *Neurology* 2017; **88**(13): 1250-5.
195. Yarnitsky D, Dodick DW, Grosberg BM, et al. Remote Electrical Neuromodulation (REN) Relieves Acute Migraine: a Randomized, Double-Blind, Placebo-Controlled, Multicenter Trial. *Headache* 2019.
196. Yeh ML, Chung YC, Chen KM, Tsou MY, Chen HH. Acupoint electrical stimulation reduces acute postoperative pain in surgical patients with patient-controlled analgesia: a randomized controlled study. *Alternative therapies in health and medicine* 2010; **16**(6): 10-8.
197. Yeh M-L, Chung Y-C, Hsu L-C, Hung S-H. Effect of transcutaneous acupoint electrical stimulation on post-hemorrhoidectomy-associated pain, anxiety, and heart rate variability: A randomized-controlled study. *Clinical Nursing Research* 2018; **27**(4): 450-66.
198. Yilmaz M, Tarakci D, Tarakci E. Comparison of high-intensity laser therapy and combination of ultrasound treatment and transcutaneous nerve stimulation on cervical pain associated with cervical disc herniation: A randomized trial. *Complementary therapies in medicine* 2020; **49**: 102295.
199. Yip YB, Sonny Tse HM, Wu KK. An experimental study comparing the effects of combined transcutaneous acupoint electrical stimulation and electromagnetic millimeter waves for spinal pain in Hong Kong. *Complementary therapies in clinical practice* 2007; **13**(1): 4-14.
200. Youssef T, Youssef M, Thabet W, et al. Randomized clinical trial of transcutaneous electrical posterior tibial nerve stimulation versus lateral internal sphincterotomy for treatment of chronic anal fissure. *International journal of surgery (London, England)* 2015; **22**: 143-8.
201. Yu X, Zhang F, Chen B. The effect of TEAS on the quality of early recovery in patients undergoing gynecological laparoscopic surgery: a prospective, randomized, placebo-controlled trial. *Trials* 2020; **21**(1).
202. Zeb A, Arsh A, Bahadur S, Ilyas SM. Effectiveness of transcutaneous electrical nerve stimulation in management of neuropathic pain in patients with post traumatic incomplete spinal cord injuries. *Pakistan journal of medical sciences* 2018; **34**(5): 1177-80.

## 10\_OL-TABLE3\_ExcludedStudies

- 1  
2 203. Zhan W, Tian W. Addition of transcutaneous electric acupoint stimulation to transverse abdominis plane block for postoperative analgesia in abdominal surgery: A randomized  
3 controlled trial. *European Journal of Integrative Medicine* 2020; **35**.
- 4 204. Zhang Q, Gao Z, Wang H, et al. The effect of pre-treatment with transcutaneous electrical acupoint stimulation on the quality of recovery after ambulatory breast surgery: a  
5 prospective, randomised controlled trial. *Anaesthesia* 2014; **69**(8): 832-9.
- 6 205. Zhang H, Lei C, Zhang TY, et al. Randomized controlled trial of TEAS with different acupoints combination on opioids consumption in patients undergoing off-pump coronary artery  
7 bypass grafting. *International Journal of Clinical and Experimental Medicine* 2016; **9**(12): 23060-71.
- 8 206. Zhang C, Xiao Z, Zhang X, et al. Transcutaneous electrical stimulation of somatic afferent nerves in the foot relieved symptoms related to postoperative bladder spasms. *BMC urology*  
9 2017; **17**(1): 58.
- 10 207. Zhang XY, Fu Y, Zhang XD, Ding JX, Hua KQ. The effect of transcutaneous electrical stimulation treatment in combination with intraoperative nerve staining on sexual function  
11 after radical hysterectomy: a pilot study. *European journal of gynaecological oncology* 2020; **41**(2): 188-91.
- 12 208. Zhao WL, Wang C, Li ZZ, et al. Efficacy and Safety of Transcutaneous Electrical Acupoint Stimulation to Treat Muscle Spasticity following Brain Injury: A Double-Blinded,  
13 Multicenter, Randomized Controlled Trial. *PloS one* 2015; **10**(2).
- 14 209. Zhou D, Hu B, He S, et al. Transcutaneous electrical acupoint stimulation accelerates the recovery of gastrointestinal function after cesarean section: A randomized controlled trial.  
15 *Evidence-Based Complementary and Alternative Medicine* 2018; **2018**: 7341920.
- 16 210. Zizic TM, Hoffman KC, Holt PA, et al. The treatment of osteoarthritis of the knee with pulsed electrical stimulation. *The Journal of rheumatology* 1995; **22**(9): 1757-61.
- 17  
18  
19  
20  
21  
22  
23  
24  
25  
26  
27  
28  
29  
30  
31  
32  
33  
34  
35  
36  
37  
38  
39  
40  
41  
42  
43  
44  
45  
46



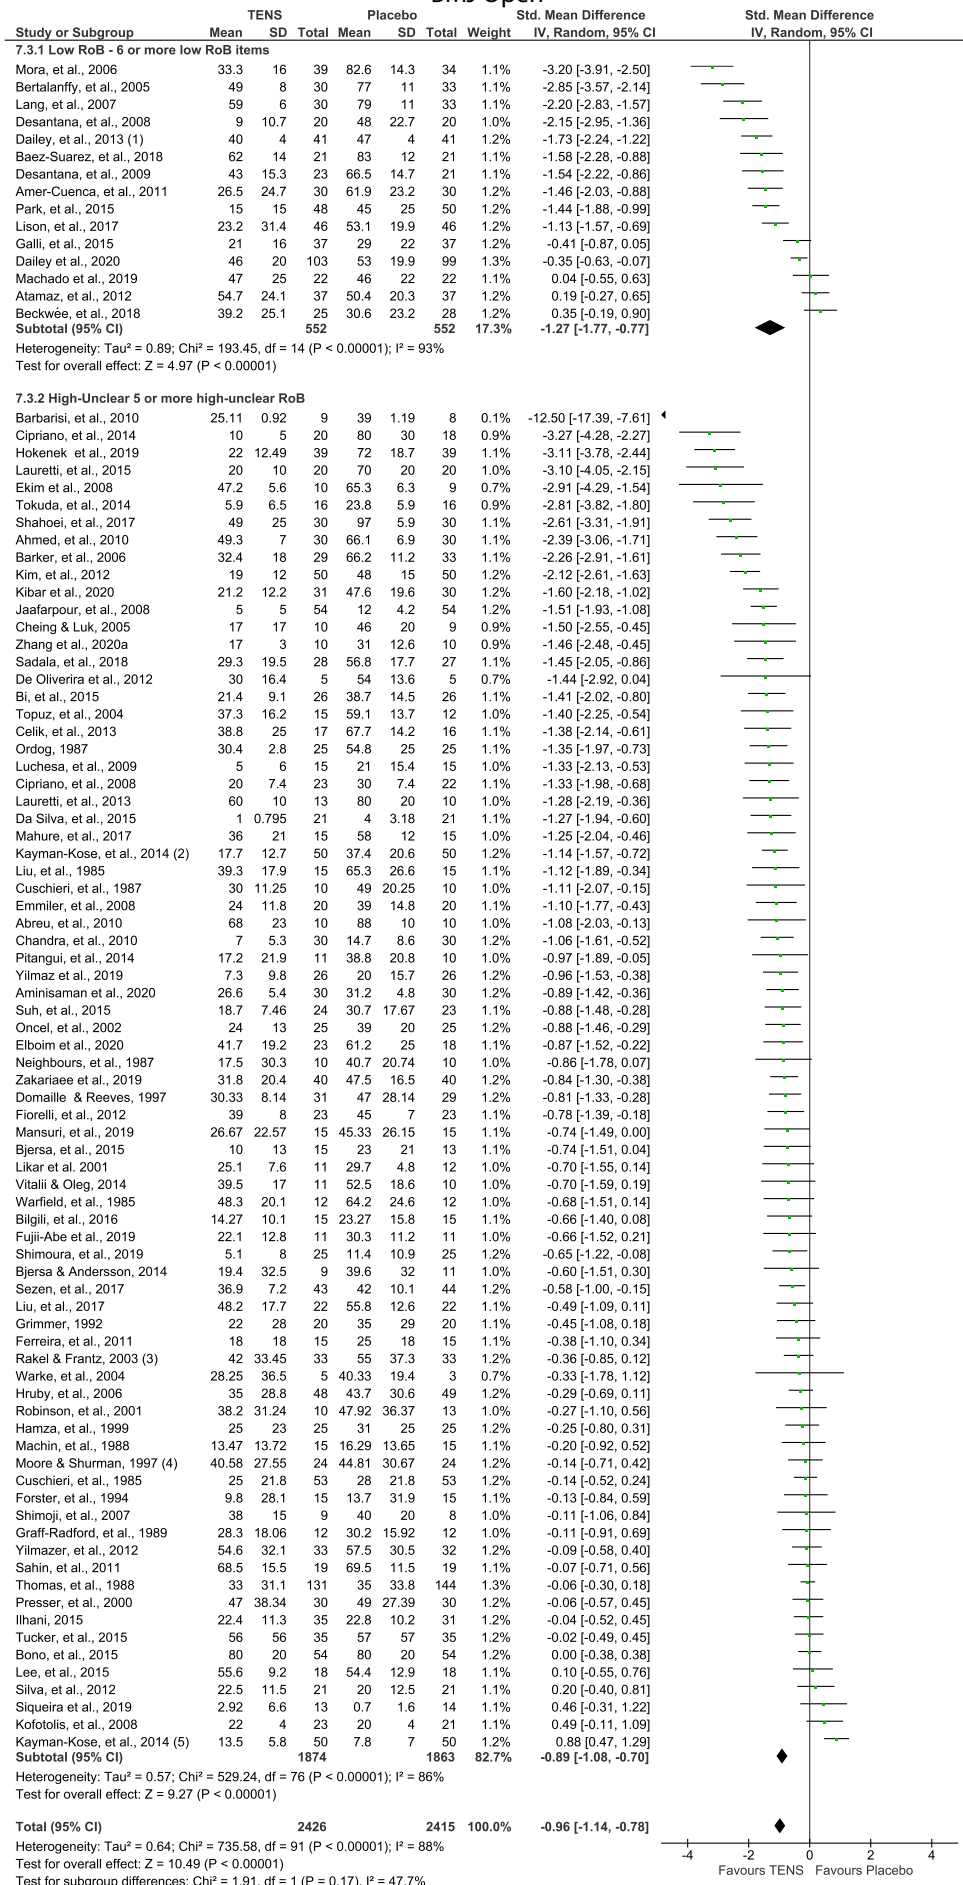

Footnotes

- (1) \*Crossover
- (2) Caesarian delivery sample
- (3) \*Crossover
- (4) \*Crossover
- (5) Vaginal delivery sample

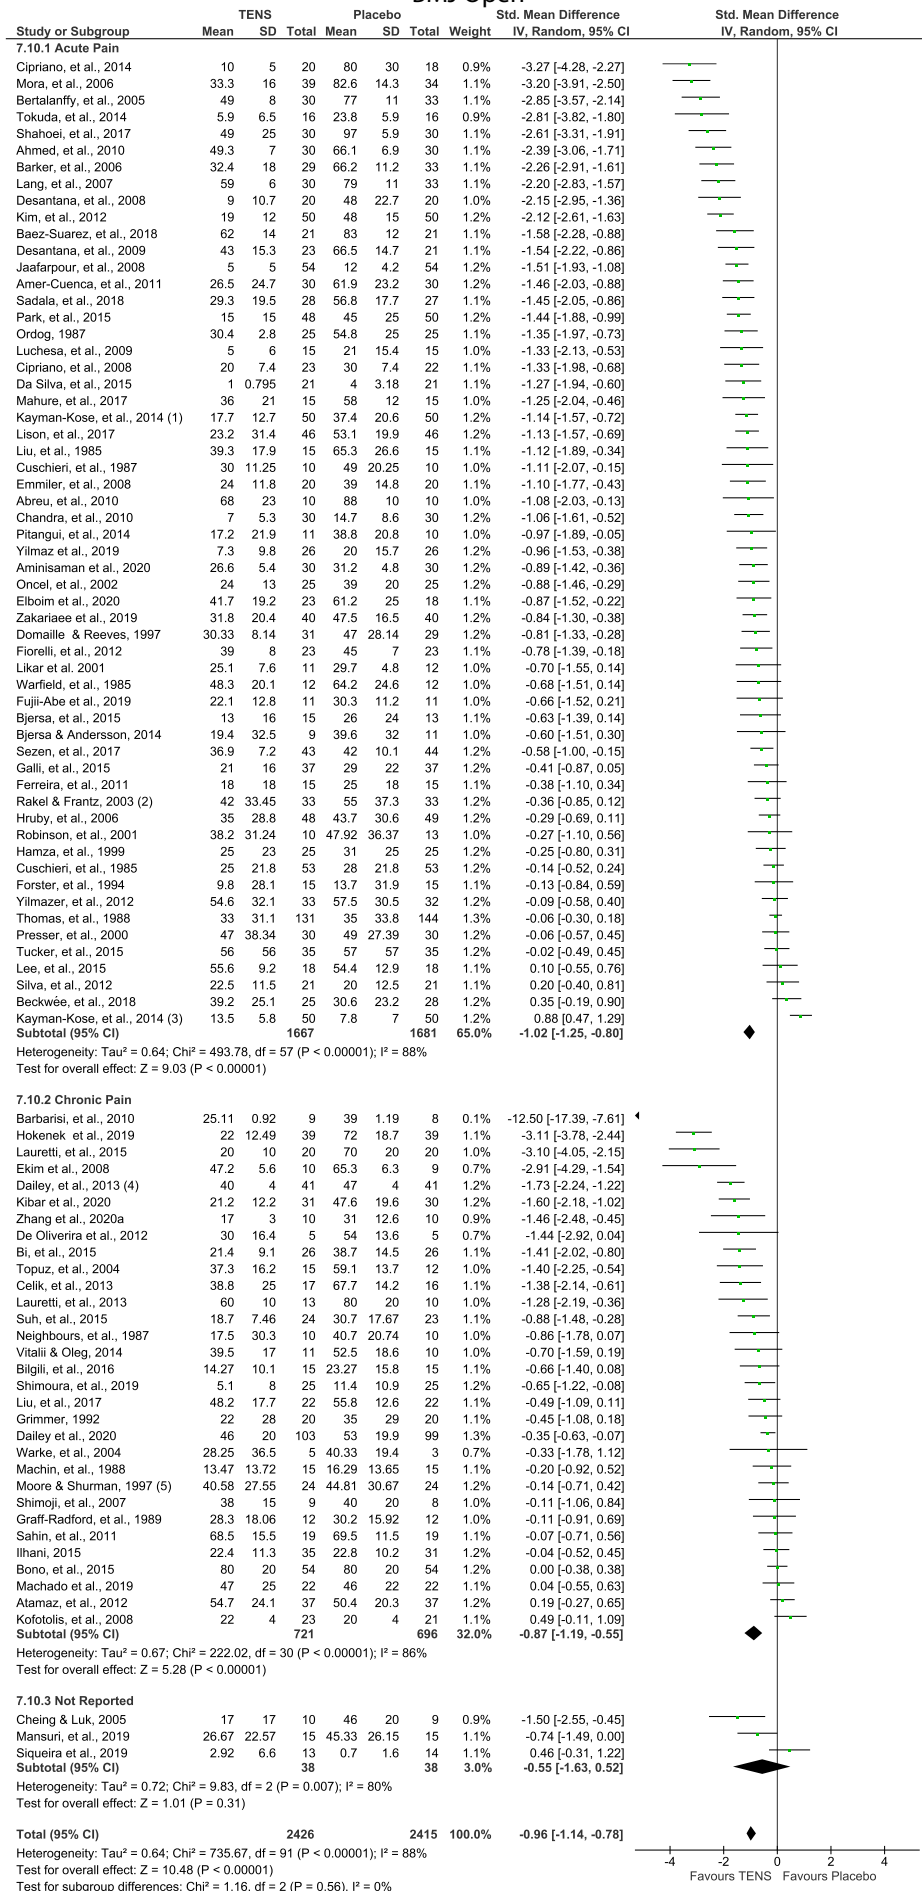

Footnotes

- (1) Caesarian delivery sample
- (2) \*Crossover
- (3) Vaginal delivery sample
- (4) \*Crossover
- (5) \*Crossover

## Adverse Events

ONLINE TABLE 4

| Reference                      | Reference number | Extracted Text                                                                                                                                                                                                 | AEs related to TENS               | Statement   | Extractable Data | Comment                                                                               |
|--------------------------------|------------------|----------------------------------------------------------------------------------------------------------------------------------------------------------------------------------------------------------------|-----------------------------------|-------------|------------------|---------------------------------------------------------------------------------------|
| (Abbasi et al., 2019)          | <sup>1</sup>     | No statements present                                                                                                                                                                                          | No information to extract         | N           | N                |                                                                                       |
| (Abelson et al., 1983)         | <sup>2</sup>     | The only side effect was a slight skin irritation at the site of electrode placement in some of the patients in the transcutaneous electrical nerve stimulation treated group                                  | Skin irritation due to electrodes | Y           | N                | No numerical data to extract                                                          |
| (Abreu et al., 2010)           | <sup>3</sup>     | No statements present                                                                                                                                                                                          | No information to extract         | N           | N                |                                                                                       |
| (Acedo et al., 2015)           | <sup>4</sup>     | No statements present                                                                                                                                                                                          | No information to extract         | N           | N                |                                                                                       |
| (Adedoyin et al., 2005)        | <sup>5</sup>     | No statements present                                                                                                                                                                                          | No information to extract         | N           | N                |                                                                                       |
| (Ahmed, 2010)                  | <sup>6</sup>     | Due to the absence of complications and adverse effects of TENS compared to conventional opioids and non-opioid analgesics, we suggest that TENS is a safe and reliable therapeutic procedure. – in Discussion | No information to extract         | Y – 0 tally | N – 0 tally      | Unclear whether the statement on AEs was generic or in relation to the study findings |
| (Ahmed et al., 2020)           | <sup>7</sup>     | No statements present                                                                                                                                                                                          | No information to extract         | N           | N                |                                                                                       |
| (Alcidi et al., 2007)          | <sup>8</sup>     | No statements present                                                                                                                                                                                          | No information to extract         | N           | N                |                                                                                       |
| (Ali et al., 1981)             | <sup>9</sup>     | No statements present                                                                                                                                                                                          | No information to extract         | N           | N                |                                                                                       |
| (Alizade and Ahmadizad, 2009)  | <sup>10</sup>    | No statements present                                                                                                                                                                                          | No information to extract         | N           | N                | Only mentions potential irritation of skin in introductory section                    |
| (Allais et al., 2003)          | <sup>11</sup>    | No serious side effects occurred in any group during the study.                                                                                                                                                | Reported no adverse events        | Y – 0 tally | N – 0 tally      |                                                                                       |
| (Alm et al., 1979)             | <sup>12</sup>    | In our group of 75 patients we found no significant skin reactions                                                                                                                                             | No information to extract         | N           | N                | Only relates to skin reaction, not other AEs                                          |
| (Al-Smadi et al., 2003)        | <sup>13</sup>    | No statements present                                                                                                                                                                                          | No information to extract         | N           | N                |                                                                                       |
| (Altay et al., 2010)           | <sup>14</sup>    | No statements present                                                                                                                                                                                          | No information to extract         | N           | N                |                                                                                       |
| (Alvarez-Arenal et al., 2002)  | <sup>15</sup>    | No statements present                                                                                                                                                                                          | No information to extract         | N           | N                |                                                                                       |
| (Alves Silverio et al., 2015)  | <sup>16</sup>    | No statements present                                                                                                                                                                                          | No information to extract         | N           | N                |                                                                                       |
| (Amer-Cuenca et al., 2011)     | <sup>17</sup>    | No subject reported adverse events such as skin allergy, pain or burning at the electrode site in either active TENS or placebo TENS groups.                                                                   | Reported no adverse events        | Y – 0 tally | N – 0 tally      |                                                                                       |
| (AminiSaman et al., 2020)      | <sup>18</sup>    | No statements present                                                                                                                                                                                          | No information to extract         | N           | N                |                                                                                       |
| (Angulo and Colwell Jr, 1990)  | <sup>19</sup>    | No statement present                                                                                                                                                                                           | No information to extract         | N           | N                |                                                                                       |
| (Ardic et al., 2002)           | <sup>20</sup>    | No statements present                                                                                                                                                                                          | No information to extract         | N           | N                |                                                                                       |
| (Arvidsson and Eriksson, 1986) | <sup>21</sup>    | No statements present                                                                                                                                                                                          | No information to extract         | N           | N                | Conclusion states that TENS lacks side-effects.                                       |
| (Asgari et al., 2018)          | <sup>22</sup>    | Student's <i>t</i> -test and chi-square were applied to compare baseline characteristics and side effects among groups.                                                                                        | No information to extract         | N           | N                | No mention of adverse events in results or discussion despite                         |

| Reference                  | Reference number | Extracted Text                                                                                                                                                                                                                       | AEs related to TENS                                      | Statement   | Extractable Data | Comment                                                                                                                                                        |
|----------------------------|------------------|--------------------------------------------------------------------------------------------------------------------------------------------------------------------------------------------------------------------------------------|----------------------------------------------------------|-------------|------------------|----------------------------------------------------------------------------------------------------------------------------------------------------------------|
| (Atamaz et al., 2012)      | <sup>23</sup>    | No statements present                                                                                                                                                                                                                | No information to extract                                | N           | N                | the method describing how these would be analysed<br>Flow chart in Fig 1 shows that 6 participants in TENS groups dropped out because of worsening symptoms    |
| (Aydin et al., 2005)       | <sup>24</sup>    | No complications occurred as a result of the treatments given.                                                                                                                                                                       | Reported no adverse events                               | Y – 0 tally | N – 0 tally      |                                                                                                                                                                |
| (Azatcam et al., 2017)     | <sup>25</sup>    | No statements present                                                                                                                                                                                                                | No information to extract                                | N           | N                |                                                                                                                                                                |
| (Báez-Suárez et al., 2018) | <sup>26</sup>    | No patients in any group reported adverse events such as skin allergy or burning at the electrode site.                                                                                                                              | Reported no adverse events on mothers or new-born babies | Y – 0 tally | N – 0 tally      |                                                                                                                                                                |
| (Bai et al., 2017)         | <sup>27</sup>    | The results of the present study demonstrate that TENS can reduce the intensity of the pain associated with PD without any AEs.                                                                                                      | Reported no adverse events                               | Y – 0 tally | N – 0 tally      |                                                                                                                                                                |
| (Baki et al., 2015)        | <sup>28</sup>    | In our study, TENS has beneficial effects for pain relief after thoracotomy without any side effects; ...                                                                                                                            | Reported no adverse events                               | Y – 0 tally | N – 0 tally      |                                                                                                                                                                |
| (Ballegaard et al., 1985)  | <sup>29</sup>    | No statements present                                                                                                                                                                                                                | No information to extract                                | N           | N                |                                                                                                                                                                |
| (Barbarisi et al., 2010)   | <sup>30</sup>    | No statements present                                                                                                                                                                                                                | No information to extract                                | N           | N                | In the final visit (visit IX), all the groups underwent a clinical-neurologic examination and routine blood tests to evaluate the possibility of side effects. |
| (Barker et al., 2006)      | <sup>31</sup>    | We can recommend this technique because of its simple use and the lack of side-effects in our study population.                                                                                                                      | Reported no adverse events                               | Y – 0 tally | N – 0 tally      |                                                                                                                                                                |
| (Barker et al., 2008)      | <sup>32</sup>    | No statements present                                                                                                                                                                                                                | No information to extract                                | N           | N                | Authors state that patients were asked to report adverse events but these were not recorded in results.                                                        |
| (Başkurt et al., 2006)     | <sup>33</sup>    | No statements present                                                                                                                                                                                                                | No information to extract                                | N           | N                |                                                                                                                                                                |
| (Bayindir et al., 1991)    | <sup>34</sup>    | No statements present<br>Low cost, lack of undesirable side effects, and ease of application can make TENS an acceptable method of reducing postoperative chest pain.....                                                            | No information to extract                                | N           | N                | No specific mention of monitoring adverse events in methods or results                                                                                         |
| (Beckwée et al., 2018)     | <sup>35</sup>    | No statements present<br>.... TENS could be experienced as painful instead of pain relieving, and thus, TENS could have an adverse effect on pain in a subgroup of patients.                                                         | No information to extract                                | N           | N                | Authors comments refer to patients with central sensitisation                                                                                                  |
| (Benedetti et al., 1997)   | <sup>36</sup>    | No statements present.<br>We emphasize that the absence of complications and side effects of TENS compared with conventional opioid and nonopioid analgesics makes electrical stimulation a safe and reliable therapeutic procedure. | No information to extract                                | N           | N                |                                                                                                                                                                |

| Reference                      | Reference number | Extracted Text                                                                                                                                                                                                                                                                                                                                                                            | AEs related to TENS                                                                                                 | Statement   | Extractable Data | Comment                                                                                                                     |
|--------------------------------|------------------|-------------------------------------------------------------------------------------------------------------------------------------------------------------------------------------------------------------------------------------------------------------------------------------------------------------------------------------------------------------------------------------------|---------------------------------------------------------------------------------------------------------------------|-------------|------------------|-----------------------------------------------------------------------------------------------------------------------------|
| (Bennett et al., 2010)         | 37               | Overall, 9 patients experienced adverse events and median number of adverse events per patient was 2 (range 1, 6). Distribution of adverse events was similar following active or placebo TENS applications (describe in Table 4 of their report)                                                                                                                                         | One adverse event directly related to placebo TENS treatment. Two participants withdrew because of increasing pain. | Y           | Y                | Authors do not describe nature of adverse events reported in table 4.<br><br>Data:<br>TENS = 3 events<br>Placebo = 2 events |
| (Bergeron-Vezina et al., 2018) | 38               | No harms or unintended effects were reported by the participants.                                                                                                                                                                                                                                                                                                                         | Reported no adverse events                                                                                          | Y – 0 tally | N – 0 tally      |                                                                                                                             |
| (Bertalanffy et al., 2005)     | 39               | No statements present<br>Due to its simplicity and lack of side effects, this method should be considered in these patients.                                                                                                                                                                                                                                                              | No information to extract                                                                                           | N           | N                |                                                                                                                             |
| (Bi et al., 2015)              | 40               | No statements present                                                                                                                                                                                                                                                                                                                                                                     | No information to extract                                                                                           | N           | N                |                                                                                                                             |
| (Bilgili et al., 2016)         | 41               | No statements present                                                                                                                                                                                                                                                                                                                                                                     | No information to extract                                                                                           | N           | N                |                                                                                                                             |
| (Binder et al., 2011)          | 42               | No statements present                                                                                                                                                                                                                                                                                                                                                                     | No information to extract                                                                                           | N           | N                |                                                                                                                             |
| (Bjersa and Andersson, 2014)   | 43               | No statements present                                                                                                                                                                                                                                                                                                                                                                     | No information to extract                                                                                           | N           | N                |                                                                                                                             |
| (Bjersa et al., 2015)          | 44               | No statements present                                                                                                                                                                                                                                                                                                                                                                     | No information to extract                                                                                           | N           | N                |                                                                                                                             |
| (Bloodworth et al., 2004)      | 45               | No statements present                                                                                                                                                                                                                                                                                                                                                                     | No information to extract                                                                                           | N           | N                |                                                                                                                             |
| (Bolat et al., 2019)           | 46               | “... prevention of unpleasant feelings or complications. A reddish coloration and burning or itching at the electrode–skin junction can occur due to increased blood circulation. However, we observed none of these side effects in the present study”.                                                                                                                                  | Reported no adverse events                                                                                          | Y - 0 tally | N                |                                                                                                                             |
| (Bono et al., 2015)            | 47               | Neither adverse events nor side effects occurred in the real or sham group.                                                                                                                                                                                                                                                                                                               | Reported no adverse events                                                                                          | Y – 0 tally | N – 0 tally      |                                                                                                                             |
| (Borjesson et al., 1997)       | 48               | No adverse effects were seen.....                                                                                                                                                                                                                                                                                                                                                         | Reported no adverse events                                                                                          | Y = 0 tally | N = 0 tally      |                                                                                                                             |
| (Borjesson et al., 1998)       | 49               | No statements present                                                                                                                                                                                                                                                                                                                                                                     | No information to extract                                                                                           | N           | N                |                                                                                                                             |
| (Borup et al., 2009)           | 50               | No signs of serious or prolonged side effects were found, neither by using acupuncture nor TENS.                                                                                                                                                                                                                                                                                          | 84% of TENS group stated it had no side-effects.                                                                    | Y = 0 tally | N = 0 tally      | No information included on any participants who did experience side-effects.                                                |
| (Breit and Van der Wall, 2004) | 51               | No statements present                                                                                                                                                                                                                                                                                                                                                                     | No information to extract                                                                                           | N           | N                |                                                                                                                             |
| (Buchmuller et al., 2012)      | 52               | Twelve patients presented a serious adverse event during the study: five in the active TENS group and seven in the sham TENS group. None of these events was considered to be attributable to the treatment studied. Skin irritation was observed in 11 patients in the active TENS group (leading to study discontinuation in one patient) and in three patients in the sham TENS group. | No details about adverse events included in report (except for skin irritation)                                     | Y           | Y                | Data:<br>TENS = 11 events<br>Placebo = 3 events                                                                             |
| (Bulut et al., 2011)           | 53               | When side effects were compared, there was no difference between the groups, except skin irritation only in one patient in Group A (p> 0.05).                                                                                                                                                                                                                                             | One patient with skin irritation.                                                                                   | Y           | N                | No numerical data – implies all groups were zero except for                                                                 |

| Reference                                                                                | Reference number                                                            | Extracted Text                                                                                                                                                                                                                                                                                                                                                                                                                                                                                                                                                                                                                                                                            | AEs related to TENS                      | Statement   | Extractable Data | Comment                                                       |
|------------------------------------------------------------------------------------------|-----------------------------------------------------------------------------|-------------------------------------------------------------------------------------------------------------------------------------------------------------------------------------------------------------------------------------------------------------------------------------------------------------------------------------------------------------------------------------------------------------------------------------------------------------------------------------------------------------------------------------------------------------------------------------------------------------------------------------------------------------------------------------------|------------------------------------------|-------------|------------------|---------------------------------------------------------------|
|                                                                                          |                                                                             |                                                                                                                                                                                                                                                                                                                                                                                                                                                                                                                                                                                                                                                                                           |                                          |             |                  | Group A but cannot be certain so not extracting               |
| (Bundsen et al., 1982)                                                                   | <sup>54</sup>                                                               | It can thus be concluded that no adverse effect of TNS is demonstrable by clinical, laboratory or neurological examination of the infants after pain relief by TNS                                                                                                                                                                                                                                                                                                                                                                                                                                                                                                                        | Reported no adverse events               | Y = 0 tally | N = 0 TENS ONLY  |                                                               |
| (Can et al., 2003)                                                                       | <sup>55</sup>                                                               | No statements present                                                                                                                                                                                                                                                                                                                                                                                                                                                                                                                                                                                                                                                                     | No information to extract                | N           | N                |                                                               |
| (Casale et al., 2013)                                                                    | <sup>56</sup>                                                               | No statements present                                                                                                                                                                                                                                                                                                                                                                                                                                                                                                                                                                                                                                                                     | No information to extract                | N           | N                |                                                               |
| (Çebi, 2019)                                                                             | <sup>57</sup>                                                               | No statements present                                                                                                                                                                                                                                                                                                                                                                                                                                                                                                                                                                                                                                                                     | No information to extract                | N           | N                |                                                               |
| (Celik et al., 2013)                                                                     | <sup>58</sup>                                                               | No side effects of low frequency TENS were seen                                                                                                                                                                                                                                                                                                                                                                                                                                                                                                                                                                                                                                           | Reported no adverse events               | Y           | Y                | No numerical data                                             |
| (Cetin et al., 2008)                                                                     | <sup>59</sup>                                                               | No statements present                                                                                                                                                                                                                                                                                                                                                                                                                                                                                                                                                                                                                                                                     | No information to extract                | N           | N                |                                                               |
| (Chandra et al., 2010)                                                                   | <sup>60</sup>                                                               | The incidence of side effects was negligible in both the groups.                                                                                                                                                                                                                                                                                                                                                                                                                                                                                                                                                                                                                          | Reported no adverse events               | Y = 0 tally | N = 0 tally      |                                                               |
| (Cheing and Hui-Chan, 1999)                                                              | <sup>61</sup>                                                               | No statements present                                                                                                                                                                                                                                                                                                                                                                                                                                                                                                                                                                                                                                                                     | No information to extract                | N           | N                |                                                               |
| (Cheing and Luk, 2005)                                                                   | <sup>62</sup>                                                               | No statements present                                                                                                                                                                                                                                                                                                                                                                                                                                                                                                                                                                                                                                                                     | No information to extract                | N           | N                |                                                               |
| (Cheing et al., 2002)                                                                    | <sup>63</sup>                                                               | No statements present                                                                                                                                                                                                                                                                                                                                                                                                                                                                                                                                                                                                                                                                     | No information to extract                | N           | N                |                                                               |
| (Cheing et al., 2003)                                                                    | <sup>64</sup>                                                               | No statements present                                                                                                                                                                                                                                                                                                                                                                                                                                                                                                                                                                                                                                                                     | No information to extract                | N           | N                |                                                               |
| (Chellappa and Thirupathy, 2020)                                                         | <sup>65</sup>                                                               | No statements present                                                                                                                                                                                                                                                                                                                                                                                                                                                                                                                                                                                                                                                                     | No information to extract                | N           | N                |                                                               |
| (Cherian et al., 2016a) – Primary Report<br><br>Secondary Report (Cherian et al., 2016b) | <sup>66</sup> – Primary Report<br><br>Secondary Report<br><br><sup>67</sup> | Patients were observed for adverse effects due to the TENS device throughout the study. Reports were rare but included local irritation at site of pad placement (n = 2) and irritation due to improper brace fitting (n = 1). All of these were minor and self-limited and did not prevent any patients from continuing a full course of TENS treatment (3 months). There were no serious adverse reactions reported. In addition, patients were evaluated for the need for surgery, either total knee arthroplasty or arthroscopy.<br><br>From <sup>67</sup> secondary report: Adverse events seen during the trial included skin irritation, increased pain, and local skin breakdown. | Skin irritation – no further information | Y           | N                | No numerical data from the control group means cannot extract |
| (Chesterton et al., 2013)<br><br>Secondary Report (Lewis et al., 2015)                   | <sup>68</sup><br><br>Secondary Report<br><br><sup>69</sup>                  | No adverse reactions to treatment were recorded.                                                                                                                                                                                                                                                                                                                                                                                                                                                                                                                                                                                                                                          | Reported no adverse events               | Y = 0 tally | N = 0 tally      |                                                               |
| (Chia et al., 1990)                                                                      | <sup>70</sup>                                                               | No statements present                                                                                                                                                                                                                                                                                                                                                                                                                                                                                                                                                                                                                                                                     | No information to extract                | N           | N                |                                                               |
| (Chiou et al., 2019)                                                                     | <sup>71</sup>                                                               | No statements present                                                                                                                                                                                                                                                                                                                                                                                                                                                                                                                                                                                                                                                                     | No information to extract                | N           | N                |                                                               |



| Reference                       | Reference number | Extracted Text                                                                                                                                                                                                                                                                                                                                                                                                                                                                                                                                                                                                                                         | AEs related to TENS                                                | Statement   | Extractable Data | Comment                                                                                                                                                                                                                   |
|---------------------------------|------------------|--------------------------------------------------------------------------------------------------------------------------------------------------------------------------------------------------------------------------------------------------------------------------------------------------------------------------------------------------------------------------------------------------------------------------------------------------------------------------------------------------------------------------------------------------------------------------------------------------------------------------------------------------------|--------------------------------------------------------------------|-------------|------------------|---------------------------------------------------------------------------------------------------------------------------------------------------------------------------------------------------------------------------|
| (Chitsaz et al., 2009)          | 72               | TENS: Lost to follow-up (n=1) due to difficulties keeping appointments. Nortriptyline: Withdrawal (n=3) due to adverse effects. Nortriptyline was generally well tolerated and most of the adverse events reported were mild in severity. The most common side effects of nortriptyline were dry mouth (n=13), dizziness (n=6), constipation (n=5), urinary retention (n=5), nausea and headache (n=4). In 3 participants, this resulted in early discontinuation of nortriptyline and the dose of nortriptyline could not be increased per protocol due to these side effects.<br><br>There were no statements about adverse events for TENS present. | Adverse events only in Nortriptyline group.                        | Y           | Y                | Data:<br>Use dropout data resulting from AEs<br><br>TENS = 0<br>Nortriptyline = 3                                                                                                                                         |
| (Chiu et al., 2005)             | 73               | No complications occurred because of any of the treatments given. The reasons for the withdrawals included insufficient time, dissatisfaction with treatment outcome and worsening of symptoms (Figure 2). 1 withdrawal from TENS group due to worsening of symptoms                                                                                                                                                                                                                                                                                                                                                                                   | Reported no adverse events                                         | Y = 0 tally | N = 0 tally      |                                                                                                                                                                                                                           |
| (Cipriano et al., 2008)         | 74               | Electrical stimulation was well-tolerated by all patients and no relevant side effect was observed.                                                                                                                                                                                                                                                                                                                                                                                                                                                                                                                                                    | Reported no adverse events                                         | Y = 0 tally | N = 0 TENS ONLY  |                                                                                                                                                                                                                           |
| (Cipriano et al., 2014)         | 75               | TENS was well tolerated by all patients with no reported side effects.                                                                                                                                                                                                                                                                                                                                                                                                                                                                                                                                                                                 | Reported no adverse events                                         | Y = 0 tally | N = 0 TENS ONLY  |                                                                                                                                                                                                                           |
| (Coelho de Amorim et al., 2014) | 76               | No statements present                                                                                                                                                                                                                                                                                                                                                                                                                                                                                                                                                                                                                                  | No information to extract                                          | N           | N                |                                                                                                                                                                                                                           |
| (Cooperman et al., 1977)        | 77               | No statements present                                                                                                                                                                                                                                                                                                                                                                                                                                                                                                                                                                                                                                  | No information to extract                                          | N           | N                |                                                                                                                                                                                                                           |
| (Coyne et al., 1995)            | 78               | No statements present                                                                                                                                                                                                                                                                                                                                                                                                                                                                                                                                                                                                                                  | No information to extract                                          | N           | N                |                                                                                                                                                                                                                           |
| (Crompton et al., 1992)         | 79               | However, a substantial proportion of women who used the device found it frightening or unpleasant, which we consider unacceptable in the absence of an improvement in pain scores.                                                                                                                                                                                                                                                                                                                                                                                                                                                                     | Participants found the TENS device 'frightening' and 'unpleasant'. | Y           | N                | No numerical data                                                                                                                                                                                                         |
| (Cuschieri et al., 1985)        | 80               | All patients tolerated the TES device well.                                                                                                                                                                                                                                                                                                                                                                                                                                                                                                                                                                                                            | Reported no adverse events                                         | Y = 0 tally | N = 0 TENS ONLY  |                                                                                                                                                                                                                           |
| (Cuschieri et al., 1987)        | 81               | No untoward side effects were noted.                                                                                                                                                                                                                                                                                                                                                                                                                                                                                                                                                                                                                   | Reported no adverse events                                         | Y = 0 tally | N = 0 tally      |                                                                                                                                                                                                                           |
| (da Silva et al., 2008)         | 82               | No statements present                                                                                                                                                                                                                                                                                                                                                                                                                                                                                                                                                                                                                                  | No information to extract                                          | N           | N                |                                                                                                                                                                                                                           |
| (da Silva et al., 2015)         | 83               | No adverse effects were observed in the TENS group, but 33.3 % of patients in the control group reported drowsiness and nausea.                                                                                                                                                                                                                                                                                                                                                                                                                                                                                                                        | Reported no adverse events in TENS group                           | Y           | Y                | The authors reported stated that 'adverse events for TENS' was an outcome and they presented this data as AEs attributable to the interventions per se. For this reason, we have extracted the data. Nevertheless, we are |

| Reference             | Reference number | Extracted Text                                                                                                                                                                                                                                                                                                                                                                                                                                                                                                                                                                                                                                                                                                                                                                                                                                                                                                                                                                                                                                                                                                                                                                                                                                                                                                                                                                                                                                                                                                                                                                                                                                                                                                                                                                                                                                          | AEs related to TENS       | Statement | Extractable Data | Comment                                                                                                                                                                                                                                                                                                                                                                                                                                                                                                                                                                                    |
|-----------------------|------------------|---------------------------------------------------------------------------------------------------------------------------------------------------------------------------------------------------------------------------------------------------------------------------------------------------------------------------------------------------------------------------------------------------------------------------------------------------------------------------------------------------------------------------------------------------------------------------------------------------------------------------------------------------------------------------------------------------------------------------------------------------------------------------------------------------------------------------------------------------------------------------------------------------------------------------------------------------------------------------------------------------------------------------------------------------------------------------------------------------------------------------------------------------------------------------------------------------------------------------------------------------------------------------------------------------------------------------------------------------------------------------------------------------------------------------------------------------------------------------------------------------------------------------------------------------------------------------------------------------------------------------------------------------------------------------------------------------------------------------------------------------------------------------------------------------------------------------------------------------------|---------------------------|-----------|------------------|--------------------------------------------------------------------------------------------------------------------------------------------------------------------------------------------------------------------------------------------------------------------------------------------------------------------------------------------------------------------------------------------------------------------------------------------------------------------------------------------------------------------------------------------------------------------------------------------|
|                       |                  |                                                                                                                                                                                                                                                                                                                                                                                                                                                                                                                                                                                                                                                                                                                                                                                                                                                                                                                                                                                                                                                                                                                                                                                                                                                                                                                                                                                                                                                                                                                                                                                                                                                                                                                                                                                                                                                         |                           |           |                  | concerned that this data reflects efficacy of interventions to reduce AEs (drowsiness, nausea,) associated with drugs (morphine, Dipyron) rather than TENS<br><br>Data:<br>TENS = 0 events / 21<br>Control = 7 events / 21 participants                                                                                                                                                                                                                                                                                                                                                    |
| (Dailey et al., 2013) | <sup>84</sup>    | No statements present                                                                                                                                                                                                                                                                                                                                                                                                                                                                                                                                                                                                                                                                                                                                                                                                                                                                                                                                                                                                                                                                                                                                                                                                                                                                                                                                                                                                                                                                                                                                                                                                                                                                                                                                                                                                                                   | No information to extract | N         | N                |                                                                                                                                                                                                                                                                                                                                                                                                                                                                                                                                                                                            |
| (Dailey et al., 2020) | <sup>85</sup>    | <p>There were 30 adverse events related to TENS intervention in 30 participants on visits 1, 2, or 3. The most common adverse events were pain with TENS (4.8% in the active TENS group, 4% in the placebo TENS group, and 1% in the no TENS group) and skin irritation with electrodes (4.8% in the active TENS group, 1% in the placebo TENS group, and 0% in the no TENS group). Adverse events reported on visit 2 occurred during the first treatment at that visit, and adverse events reported on visit 3 were during treatment at that visit and during the 4-week period of home use.</p> <p>Serious Adverse Events.<br/>In the course of the trial, four serious adverse events (study related, n=1 and non-study related, n=3) were reported between April 2014 and April 2016 and all were categorized as hospitalization. For the study related event, the participant complained of chest pain during the 6MWT, was admitted to ER, hospitalized without diagnosed myocardial damage and recovered with treatment. For the three participant's categorized as non-study related: (1) report of chest pain at home, referred to primary care provider, admitted to ER and hospitalized with changes for thyroid medication and recovered with treatment (2) report of GI symptoms, admitted to hospital for dehydration and recovered with treatment and (3) report of depression, admitted to hospital for treatment and condition was still present and being treated at the end of her participation in the study. As a group, for these four participants, the average age was 49.75 years, ranging from 40 to 59 years. With respect to treatment group, one event occurred prior to randomization and three occurred after randomization to treatment groups (placebo-TENS, n=1 and no-TENS, n=2). The participants were further</p> | Y                         | Y         | Y                | <p>TENS = 17/103<br/>Placebo = 3/119</p> <p>Taken from data in Supplementary Table 7, available on the Arthritis &amp; Rheumatology web site at <a href="http://onlinelibrary.wiley.com/doi/10.1002/art.41170/abstract">http://onlinelibrary.wiley.com/doi/10.1002/art.41170/abstract</a>, shows rates of TENS-related Adverse events by visit. There were 4 serious adverse events, with none related to TENS use (Supplementary Results, <a href="http://onlinelibrary.wiley.com/doi/10.1002/art.41170/abstract">http://onlinelibrary.wiley.com/doi/10.1002/art.41170/abstract</a>).</p> |

| Reference                  | Reference number                  | Extracted Text                                                                                                                                                                                                                                                                                                                                                                                                                                                                                                                                                                                                                                                                                                                                                                                                                                                                                                                                                                                                                | AEs related to TENS                                                                                                      | Statement      | Extractable Data   | Comment                                                                                                                                                               |
|----------------------------|-----------------------------------|-------------------------------------------------------------------------------------------------------------------------------------------------------------------------------------------------------------------------------------------------------------------------------------------------------------------------------------------------------------------------------------------------------------------------------------------------------------------------------------------------------------------------------------------------------------------------------------------------------------------------------------------------------------------------------------------------------------------------------------------------------------------------------------------------------------------------------------------------------------------------------------------------------------------------------------------------------------------------------------------------------------------------------|--------------------------------------------------------------------------------------------------------------------------|----------------|--------------------|-----------------------------------------------------------------------------------------------------------------------------------------------------------------------|
|                            |                                   | categorized by medication (opioid, n=1 and non-opioid, n=3) and location (TN, n=3 and IA, n=1).                                                                                                                                                                                                                                                                                                                                                                                                                                                                                                                                                                                                                                                                                                                                                                                                                                                                                                                               |                                                                                                                          |                |                    |                                                                                                                                                                       |
| (Davies, 1982)             | <sup>86</sup>                     | No statements present                                                                                                                                                                                                                                                                                                                                                                                                                                                                                                                                                                                                                                                                                                                                                                                                                                                                                                                                                                                                         | No information to extract                                                                                                | N              | N                  |                                                                                                                                                                       |
| (Dawood and Ramos, 1990)   | <sup>87</sup>                     | Four subjects noticed muscle vibrations, change in stimulation with movements, tightness, headaches after use, and a slight redness or a burning sensation with TENS treatment. No mention of AEs in the Ibuprofen group                                                                                                                                                                                                                                                                                                                                                                                                                                                                                                                                                                                                                                                                                                                                                                                                      | Reported no adverse events                                                                                               | Y              | N = 0<br>TENS ONLY | No numerical data for the comparison groups (placebo, ibuprofen)                                                                                                      |
| (De Angelis et al., 2003)  | <sup>88</sup>                     | No differences in side effects were observed between TENS versus no TENS groups.<br>... the incidence of nausea was quite high in this patient sample as compared with other studies (group TENS, 8.5%; group No TENS, 11.3%) (11, 12), but this symptom was mentioned by the patient only when specifically elicited and it was probably the result of psychosomatic factors or emotional stress. However, shoulder pain was more frequent, albeit not significantly, in group TENS than in group Control (group A, 3%; group B, 0%). This is probably due to the fact that the examination lasted longer in group A than in group B (group A, 134.1 60 seconds; group B, 117 49 seconds; P .054) (using the same CO2 flow) and that the patients' acceptance of the procedure was higher with the use of the TENS device. It is completely safe, noninvasive, and free from any side effects ... as far as side effects are concerned, there were no statistically significant differences in favor of the TENS device..... | Coded as: Reported no adverse events<br><br>Extract data<br>AEs = Nausea and<br>Shoulder pain but not attributed to pain | Y = 0<br>tally | N = 0<br>tally     | No data extracted<br><br>It is difficult to ascertain whether these symptoms were AEs or due to treatment intervention of surgical procedure<br><br>No data extracted |
| (De Giorgi et al., 2017)   | <sup>89</sup>                     | No side effects were referred by the patients during the 10-week TENS treatment.                                                                                                                                                                                                                                                                                                                                                                                                                                                                                                                                                                                                                                                                                                                                                                                                                                                                                                                                              | Reported no adverse events                                                                                               | Y = 0<br>tally | N = 0<br>TENS ONLY |                                                                                                                                                                       |
| (de Oliveira, 2012)        | <sup>90</sup>                     | No statements present                                                                                                                                                                                                                                                                                                                                                                                                                                                                                                                                                                                                                                                                                                                                                                                                                                                                                                                                                                                                         | No information to extract                                                                                                | N              | N                  |                                                                                                                                                                       |
| (de Orange et al., 2003)   | <sup>91</sup>                     | No statements present                                                                                                                                                                                                                                                                                                                                                                                                                                                                                                                                                                                                                                                                                                                                                                                                                                                                                                                                                                                                         | No information to extract                                                                                                | N              | N                  |                                                                                                                                                                       |
| (de Sousa et al., 2014)    | <sup>92</sup>                     | No statements present                                                                                                                                                                                                                                                                                                                                                                                                                                                                                                                                                                                                                                                                                                                                                                                                                                                                                                                                                                                                         | No information to extract                                                                                                | N              | N                  |                                                                                                                                                                       |
| (DeSantana et al., 2008)   | <sup>93</sup>                     | We reinforce that the absence of complications and adverse effects of TENS compared with conventional opioids and nonopioid analgesics makes TENS a safe and reliable therapeutic procedure.                                                                                                                                                                                                                                                                                                                                                                                                                                                                                                                                                                                                                                                                                                                                                                                                                                  | Reported no adverse events                                                                                               | Y = 0<br>tally | N = 0<br>TENS ONLY |                                                                                                                                                                       |
| (DeSantana et al., 2009)   | <sup>94</sup>                     | We conclude that the absence of complications and adverse effects of TENS compared with conventional opioids and nonopioid analgesics makes TENS a safe and reliable therapeutic procedure.                                                                                                                                                                                                                                                                                                                                                                                                                                                                                                                                                                                                                                                                                                                                                                                                                                   | Reported no adverse events                                                                                               | Y = 0<br>tally | N = 0<br>TENS ONLY |                                                                                                                                                                       |
| (Dewan and Sharma, 2011)   | <sup>95</sup>                     | No statements present                                                                                                                                                                                                                                                                                                                                                                                                                                                                                                                                                                                                                                                                                                                                                                                                                                                                                                                                                                                                         | No information to extract                                                                                                | N              | N                  |                                                                                                                                                                       |
| Deyo et al. (1990)         | Deyo ,<br>Wals<br>h <sup>96</sup> | Approximately one-third of the subjects reported minor skin irritation at the sites of electrode placement, with equal proportions in the true-TENS and sham-TENS groups.                                                                                                                                                                                                                                                                                                                                                                                                                                                                                                                                                                                                                                                                                                                                                                                                                                                     | Skin irritation.<br>One subject had to discontinue due to severe dermatitis.                                             | Y              | N                  | No numerical data                                                                                                                                                     |
| (Dibenedetto et al., 1993) | <sup>97</sup>                     | Both treatments were well-tolerated and no side-effects reported.                                                                                                                                                                                                                                                                                                                                                                                                                                                                                                                                                                                                                                                                                                                                                                                                                                                                                                                                                             | Reported no adverse events                                                                                               | Y = 0<br>tally | N = 0<br>tally     |                                                                                                                                                                       |

| Reference                                       | Reference number                | Extracted Text                                                                                                                                                                                                                                                                                                                                                                                                                                              | AEs related to TENS                                | Statement   | Extractable Data | Comment                                                                                           |
|-------------------------------------------------|---------------------------------|-------------------------------------------------------------------------------------------------------------------------------------------------------------------------------------------------------------------------------------------------------------------------------------------------------------------------------------------------------------------------------------------------------------------------------------------------------------|----------------------------------------------------|-------------|------------------|---------------------------------------------------------------------------------------------------|
| (Dilekci et al., 2016)                          | <sup>98</sup>                   | No statements present                                                                                                                                                                                                                                                                                                                                                                                                                                       | No information to extract                          | N           |                  |                                                                                                   |
| (Dissanayaka et al., 2016)                      | <sup>99</sup>                   | No statements present                                                                                                                                                                                                                                                                                                                                                                                                                                       | No information to extract                          | N           | N                |                                                                                                   |
| (Dogu et al., 2008)                             | <sup>100</sup>                  | No statements present                                                                                                                                                                                                                                                                                                                                                                                                                                       | No information to extract                          | N           | N                |                                                                                                   |
| (Domaille and Reeves, 1997)                     | <sup>101</sup>                  | No statements present                                                                                                                                                                                                                                                                                                                                                                                                                                       | No information to extract                          | N           | N                |                                                                                                   |
| (Ebadi et al., 2018)                            | <sup>102</sup>                  | As for side effects, 8 patients in the Diadynamic group reported a burning sensation in the first 3-4 min of the treatment.                                                                                                                                                                                                                                                                                                                                 | Reported no adverse events in TENS group.          | Y           | N                | No numerical data for TENS                                                                        |
| (Ekblom and Hansson, 1987)                      | <sup>103</sup>                  | No statements present                                                                                                                                                                                                                                                                                                                                                                                                                                       | No information to extract                          | N           | N                |                                                                                                   |
| (Ekim et al., 2008)                             | <sup>104</sup>                  | No statements present                                                                                                                                                                                                                                                                                                                                                                                                                                       | No information to extract                          | N           | N                |                                                                                                   |
| (Elboim-Gabyzon et al., 2019)                   | <sup>105</sup>                  | No statements present                                                                                                                                                                                                                                                                                                                                                                                                                                       | No information to extract                          | N           | N                |                                                                                                   |
| (Elserty et al., 2016)                          | <sup>106</sup>                  | No statements present                                                                                                                                                                                                                                                                                                                                                                                                                                       | No information to extract                          | N           | N                |                                                                                                   |
| (Emmiler et al., 2008)                          | <sup>107</sup>                  | Post-op complications (atelectasia) were tabulated but not stated whether these were attributed to the intervention<br>TENS = 1/20(5%)<br>Placebo = 1/20(5%)<br>Control = 4/20 (20%)                                                                                                                                                                                                                                                                        | Reported adverse events (complication) atelectasis | Y           | N                | No data extracted – unclear whether ‘complications’ attributable to the treatment                 |
| (Engen et al., 2016)                            | <sup>108</sup>                  | No statements present                                                                                                                                                                                                                                                                                                                                                                                                                                       | No information to extract                          | N           | N                |                                                                                                   |
| (Erden and Senol Celik, 2015)                   | <sup>109</sup>                  | No statements present                                                                                                                                                                                                                                                                                                                                                                                                                                       | No information to extract                          | N           | N                |                                                                                                   |
| (Erdogan et al., 2005)                          | <sup>110</sup>                  | We did not observe any side effects using TENS, although we did not use TENS in patients who had cardiac disease.                                                                                                                                                                                                                                                                                                                                           | Reported no adverse events                         | Y = 0 tally | N = 0 TENS ONLY  |                                                                                                   |
| (Erkkola et al., 1980)                          | <sup>111</sup>                  | No statements present                                                                                                                                                                                                                                                                                                                                                                                                                                       | No information to extract                          | N           | N                |                                                                                                   |
| (Escortell-Mayor et al., 2011)                  | <sup>112</sup>                  | It is remarkable, as it is described in a publication done by this group, that no important adverse effects were observed from either therapy - Reported no adverse events <sup>112</sup> p70                                                                                                                                                                                                                                                               | Information to extract                             | Y           | Y                | Data extracted from secondary report <sup>113</sup> :<br>TENS = 7 events<br>Manual Therapy = 3    |
| Secondary Report (Escortell Mayor et al., 2008) | Secondary Report <sup>113</sup> | Translated from <sup>113</sup> p340<br>16.3% of treated patients with TENS (n = 7) and 6.4% of those treated with manual therapy (n = 3) reported adverse effects related to treatment. Three of them presented increased pain in the treated area and 1, general poor physical condition in the group treated with TENS Of those who received therapy manual, 1 patient referred a clinical worsening the first days and the rest did not detail symptoms. |                                                    |             |                  | The statement on AEs in <sup>112</sup> p70 appears to contradict data presented in <sup>113</sup> |
| (Esteban Gonzalez et al., 2015)                 | <sup>114</sup>                  | There were no complications, intolerances or other problems that required the intervention with TENS to be suspended in any of the 50 patients.                                                                                                                                                                                                                                                                                                             | Reported no adverse events                         | Y = 0 tally | N = 0 TENS ONLY  |                                                                                                   |
| (Eyigor et al., 2008)                           | <sup>115</sup>                  | No statements present                                                                                                                                                                                                                                                                                                                                                                                                                                       | No information to extract                          | N           | N                |                                                                                                   |

| Reference                    | Reference number | Extracted Text                                                                                                                                                                                                                                                        | AEs related to TENS                         | Statement   | Extractable Data | Comment                                                       |
|------------------------------|------------------|-----------------------------------------------------------------------------------------------------------------------------------------------------------------------------------------------------------------------------------------------------------------------|---------------------------------------------|-------------|------------------|---------------------------------------------------------------|
| (Eyigor et al., 2010)        | <sup>116</sup>   | No significant adverse event was reported in either of the two groups (p>0.05).                                                                                                                                                                                       | Reported no adverse events                  | Y = 0 tally | N = 0 tally      |                                                               |
| (Facci et al., 2011)         | <sup>117</sup>   | No statements present                                                                                                                                                                                                                                                 | No information to extract                   | N           | N                |                                                               |
| (Farahani et al., 2014)      | <sup>118</sup>   | No statements present                                                                                                                                                                                                                                                 | No information to extract                   | N           | N                |                                                               |
| (Farina et al., 2004)        | <sup>119</sup>   | No statements present                                                                                                                                                                                                                                                 | No information to extract                   | N           | N                |                                                               |
| (Fatima and Sarfraz, 2019)   | <sup>120</sup>   | No statements present                                                                                                                                                                                                                                                 | No information to extract                   | N           | N                |                                                               |
| (Ferraz and Moreira, 2009)   | <sup>121</sup>   | No statements present                                                                                                                                                                                                                                                 | No information to extract                   | N           | N                |                                                               |
| (Ferreira et al., 2011)      | <sup>122</sup>   | No statements present                                                                                                                                                                                                                                                 | No information to extract                   | N           | N                |                                                               |
| (Ferreira et al., 2017)      | <sup>123</sup>   | No statements present                                                                                                                                                                                                                                                 | No information to extract                   | N           | N                | Dropouts reported but reasons not given                       |
| (Finsen et al., 1988)        | <sup>124</sup>   | No statements present                                                                                                                                                                                                                                                 | No information to extract                   | N           | N                |                                                               |
| (Fiorelli et al., 2012)      | <sup>125</sup>   | We did not observe any side effects; thus, TENS may be particularly useful for patients that have liver or kidney disease.....                                                                                                                                        | Reported no adverse events                  | Y = 0 tally | N = 0 tally      |                                                               |
| (Fodor-Sertl et al., 1990)   | <sup>126</sup>   | No statements present                                                                                                                                                                                                                                                 | No information to extract                   | N           | N                |                                                               |
| (Forogh et al., 2019)        | <sup>127</sup>   | No adverse events occurred and the rate of compliance to the exercise program was high in both groups                                                                                                                                                                 | Reported no adverse events                  | Y = 0 tally | N = 0 tally      |                                                               |
| (Forst et al., 2004)         | <sup>128</sup>   | No statements present                                                                                                                                                                                                                                                 | No information to extract                   | N           | N                |                                                               |
| (Forster et al., 1994)       | <sup>129</sup>   | No statements present                                                                                                                                                                                                                                                 | No information to extract                   | N           | N                |                                                               |
| (Fujii-Abe et al., 2019)     | <sup>130</sup>   | None of the study patients suffered any abnormal or harmful effects.                                                                                                                                                                                                  | Reported no adverse events                  | Y = 0 tally | N                |                                                               |
| (Galli et al., 2015)         | <sup>131</sup>   | No statements present                                                                                                                                                                                                                                                 | No information to extract                   | N           | N                |                                                               |
| (Galloway et al., 1984)      | <sup>132</sup>   | Only one of our patients demonstrated any adverse effects of the treatment in the form of an allergic rash with blistering which, in patter, was seen to correspond exactly with the areas of contact with the adhesive incorporated in the sterile wound electrodes. | Allergic skin irritation in one participant | Y           | N                | No numerical data                                             |
| (Garcia-Perez et al., 2018)  | <sup>133</sup>   | No statements present                                                                                                                                                                                                                                                 | No information to extract                   | N           | N                |                                                               |
| (Gerson et al., 1977)        | <sup>134</sup>   | No statements present                                                                                                                                                                                                                                                 | No information to extract                   | N           | N                |                                                               |
| (Ghoname et al., 1999a)      | <sup>135</sup>   | No statements present                                                                                                                                                                                                                                                 | No information to extract                   | N           | N                |                                                               |
| (Ghoname et al., 1999b)      | <sup>136</sup>   | No statements present                                                                                                                                                                                                                                                 | No information to extract                   | N           | N                |                                                               |
| (Gilbert et al., 1986)       | <sup>137</sup>   | No statements present                                                                                                                                                                                                                                                 | No information to extract                   | N           | N                |                                                               |
| (Grabiańska et al., 2015)    | <sup>138</sup>   | No statements present                                                                                                                                                                                                                                                 | No information to extract                   | N           | N                |                                                               |
| (Graff-Radford et al., 1989) | <sup>139</sup>   | No statements present                                                                                                                                                                                                                                                 | No information to extract                   | N           | N                | Patients were informed about possible side-effects beforehand |
| (Grant et al., 1999)         | <sup>140</sup>   | .....three TENS patients developed skin reactions. Other than these, reported side effects were minimal: three acupuncture patients reported dizziness and three TENS patients developed skin reactions.                                                              | Skin reactions in 3 participants            | Y           | Y                | Data extracted:<br>TENS = 3 events<br>Acupuncture = 3 events  |
| (Gregorini et al., 2010)     | <sup>141</sup>   | No statements present                                                                                                                                                                                                                                                 | No information to extract                   | N           | N                |                                                               |
| (Grimmer, 1992)              | <sup>142</sup>   | No statements present                                                                                                                                                                                                                                                 | No information to extract                   | N           | N                |                                                               |
| (Gschiel et al., 2010)       | <sup>143</sup>   | Overall, there were no side effects.                                                                                                                                                                                                                                  | Inferred no adverse events                  | Y           | N = 0 tally      | No numerical data                                             |

| Reference                     | Reference number | Extracted Text                                                                                                                                                                                                                                                                                                                                                                                          | AEs related to TENS                                                                                                  | Statement | Extractable Data | Comment                                                                                |
|-------------------------------|------------------|---------------------------------------------------------------------------------------------------------------------------------------------------------------------------------------------------------------------------------------------------------------------------------------------------------------------------------------------------------------------------------------------------------|----------------------------------------------------------------------------------------------------------------------|-----------|------------------|----------------------------------------------------------------------------------------|
| (Gunay Ucurum et al., 2018)   | <sup>144</sup>   | No statements present                                                                                                                                                                                                                                                                                                                                                                                   | No information to extract                                                                                            | N         | N                |                                                                                        |
| (Guo and Jia, 2005)           | <sup>145</sup>   | No statements present                                                                                                                                                                                                                                                                                                                                                                                   | No information to extract                                                                                            | N         | N                |                                                                                        |
| (Hamza et al., 1999)          | <sup>146</sup>   | ...16 -20% of the patients in each of the four groups complained that the TENS adversely influenced their quality of sleep because of the presence of the cutaneous electrodes and wires.                                                                                                                                                                                                               | Sleep interference because of electrodes/wires.                                                                      | Y         | N                | No numerical data for other groups                                                     |
| (Hanfy and El-Bigawy, 2004)   | <sup>147</sup>   | No statements present<br>During the study TENS therapy was safe and allowed the patients to remain ambulatory.                                                                                                                                                                                                                                                                                          | No information to extract                                                                                            | N         | N                | No specific comments on adverse events included                                        |
| (Hansson and Ekblom, 1983)    | <sup>148</sup>   | ... it should be noted that most patients found the muscle twitches produced by the low frequency TENS uncomfortable.                                                                                                                                                                                                                                                                                   | No information to extract                                                                                            | N         | N                | No specific comments on adverse events included                                        |
| (Hansson et al., 1986)        | <sup>149</sup>   | No statements present                                                                                                                                                                                                                                                                                                                                                                                   | No information to extract                                                                                            | N         | N                |                                                                                        |
| (Hargreaves and Lander, 1989) | <sup>150</sup>   | No statements present                                                                                                                                                                                                                                                                                                                                                                                   | No information to extract                                                                                            | N         | N                | Authors state that TENS is safe but no specific comments on side-effects in this study |
| (Harrison et al., 1986)       | <sup>151</sup>   | In the present study, like all others reported to-date, no side-effects were noted from the therapy.                                                                                                                                                                                                                                                                                                    | Reported no adverse events                                                                                           | Y         | N = 0 tally      | No numerical data                                                                      |
| (Hart et al., 2012)           | <sup>152</sup>   | No statements present                                                                                                                                                                                                                                                                                                                                                                                   | No information to extract                                                                                            | N         | N                |                                                                                        |
| (Hazneci et al., 2005)        | <sup>153</sup>   | No statements present                                                                                                                                                                                                                                                                                                                                                                                   | No information to extract                                                                                            | N         | N                |                                                                                        |
| (Herrera-Lasso et al., 1993)  | <sup>154</sup>   | No statements present                                                                                                                                                                                                                                                                                                                                                                                   | No information to extract                                                                                            | N         | N                |                                                                                        |
| (Hershman M, 1989)            | <sup>155</sup>   | No statements present                                                                                                                                                                                                                                                                                                                                                                                   | No information to extract                                                                                            | N         | N                |                                                                                        |
| (Hou et al., 2002)            | <sup>156</sup>   | No statements present                                                                                                                                                                                                                                                                                                                                                                                   | No information to extract                                                                                            | N         | N                |                                                                                        |
| (Hokenek et al., 2020)        | <sup>157</sup>   | No treatment-related skin reactions or unwanted effects were encountered during the trial. Of the verum group, 3 patients declined continuation of treatment due to intolerance to paresthesia, and 2 patients in the sham group declined to continue treatment due to intolerable pain. These patients opted to instead receive 0.75 mg/kg meperidine rescue therapy and were excluded from the trial. | Unclear whether these are adverse events or dislike of TENS sensation and worsening pain due to non response to sham | Y         | N                |                                                                                        |
| (Hruby et al., 2006)          | <sup>158</sup>   | No statements present                                                                                                                                                                                                                                                                                                                                                                                   | No information to extract                                                                                            | N         | N                |                                                                                        |
| (Hsieh et al., 1992)          | <sup>159</sup>   | No statements present<br>... One-shot TENS treatment may be recommended due to the rarity of side effects and its convenient application.                                                                                                                                                                                                                                                               | No information to extract                                                                                            | N         | N                |                                                                                        |
| (Hsueh et al., 1997)          | <sup>160</sup>   | No statements present                                                                                                                                                                                                                                                                                                                                                                                   | No information to extract                                                                                            | N         | N                |                                                                                        |
| (Hughes et al., 1988)         | <sup>161</sup>   | The use of TENS had no adverse effects upon the newborn                                                                                                                                                                                                                                                                                                                                                 | Reported no adverse events                                                                                           | Y         | N = 0 TENS ONLY  | No numerical data                                                                      |
| (Husch et al., 2020)          | <sup>162</sup>   | No statements present                                                                                                                                                                                                                                                                                                                                                                                   | No information to extract                                                                                            | N         | N                |                                                                                        |
| (Ilhanli, 2015)               | <sup>163</sup>   | There were no adverse events due to treatment regimens.                                                                                                                                                                                                                                                                                                                                                 | Reported no adverse events                                                                                           | Y         | N = 0            |                                                                                        |
| (Inal et al., 2016)           | <sup>164</sup>   | No statements present                                                                                                                                                                                                                                                                                                                                                                                   | No information to extract                                                                                            | N         | N                |                                                                                        |



| Reference                    | Reference number | Extracted Text                                                                                                                                                                                                                                                                                                                                                                                                                                              | AEs related to TENS           | Statement | Extractable Data   | Comment                                                                                                                                        |
|------------------------------|------------------|-------------------------------------------------------------------------------------------------------------------------------------------------------------------------------------------------------------------------------------------------------------------------------------------------------------------------------------------------------------------------------------------------------------------------------------------------------------|-------------------------------|-----------|--------------------|------------------------------------------------------------------------------------------------------------------------------------------------|
| (Isik et al., 2017)          | <sup>165</sup>   | There were no serious side effects in both groups. In the TENS group no side effects were reported although 21 of the patients reported the treatment as boring due to the long hospital stay.<br>In the leech therapy group, there was a mild local itching and skin redness in 31 patients (12 patients required topical antihistamine therapy) and severe local itching and reddening in 3 patients (requiring oral plus topical antihistamine therapy). | Reported no adverse events    | Y         | Y                  | TENS = 0 events / 53 participants<br>Leech = 34 events / 52 participants                                                                       |
| (Jaafarpour et al., 2008)    | <sup>166</sup>   | No statements present                                                                                                                                                                                                                                                                                                                                                                                                                                       | No information to extract     | N         | N                  |                                                                                                                                                |
| (Jamison et al., 2019)       | <sup>167</sup>   | None of the participants reported experiencing any long-term adverse effects from using the hfTENS.                                                                                                                                                                                                                                                                                                                                                         | Reported no adverse events    | Y         | N = 0<br>TENS ONLY | No numerical data                                                                                                                              |
| (Jarzem et al., 2005)        | <sup>168</sup>   | No statements present                                                                                                                                                                                                                                                                                                                                                                                                                                       | No information to extract     | N         | N                  |                                                                                                                                                |
| (Jensen et al., 1985)        | <sup>169</sup>   | No statements present                                                                                                                                                                                                                                                                                                                                                                                                                                       | No information to extract     | N         | N                  |                                                                                                                                                |
| (Jensen et al., 1991)        | <sup>170</sup>   | No statements present                                                                                                                                                                                                                                                                                                                                                                                                                                       | No information to extract     | N         | N                  |                                                                                                                                                |
| (Jones and Hutchinson, 1991) | <sup>171</sup>   | Three patients complained of dizziness after Entonox inhalation. There were no other side-effects of any of the treatments. TENS produced no side-effects, is easier to handle and was subjectively preferred by the patients.                                                                                                                                                                                                                              | Reported no adverse events    | Y         | N = 0              | No data extracted<br>Multiple cross over study with possibility of contamination between treatments                                            |
| (Kara et al., 2011)          | <sup>172</sup>   | Furthermore, there were no adverse effects or negative results related to TENS application.                                                                                                                                                                                                                                                                                                                                                                 | Reported no adverse events    | Y         | N = 0<br>TENS ONLY | No numerical data                                                                                                                              |
| (Kararmaz et al., 2004)      | <sup>173</sup>   | TENS is a non-invasive, safe, and simple treatment method, which does not have any systemic side effects. We did not observe any difficulties in the use of TENS. NOTE: Table 4 records side effects associated with ESWL procedure as an efficacy measure                                                                                                                                                                                                  | Reported no adverse events    | Y         | N = 0<br>TENS ONLY | No numerical data associated with AEs due to treatment interventions under study<br><br>The only side-effects reported were medication-induced |
| (Kayman-Kose et al., 2014)   | <sup>174</sup>   | No adverse effects due to TENS occurred during the study period - for both Cesarean and vaginal delivery data                                                                                                                                                                                                                                                                                                                                               | Reported no adverse events    | Y         | N = 0<br>TENS ONLY | No numerical data                                                                                                                              |
| (Keskin et al., 2012)        | <sup>175</sup>   | No adverse effect of TENS application on pregnant women was observed during the study.                                                                                                                                                                                                                                                                                                                                                                      | Reported no adverse events    | Y         | N                  | No numerical data for comparison group                                                                                                         |
| (Kibar et al., 2020)         | <sup>176</sup>   | No statements present                                                                                                                                                                                                                                                                                                                                                                                                                                       | No information to extract     | N         | N                  |                                                                                                                                                |
| (Kim et al., 2012)           | <sup>177</sup>   | There were no significant differences in the incidences of side effects such as erythema and itching between the groups ( $P > 0.05$ ). TENS Group 7/50 (14%) had erythema and 1/50 (2%) had itching. Table II of their report                                                                                                                                                                                                                              | Erythema and itching.         | Y         | Y                  | Data extracted:<br>TENS = 8 events / 50 participants<br>Placebo = 7 / 50 participants                                                          |
| (Kim et al., 2014)           | <sup>178</sup>   | No major adverse effects were reported by participants in any treatment group. One patient in the monotherapy group, one patient in the TENS+Np group, and one patient in the CAP+Np group experienced skin itching. One patient in the TENS+Np group and one patient in the HEAT+Np group                                                                                                                                                                  | Itching and sleep disturbance | Y         | Y                  | Data extracted (skin itching):<br>TENS + NSAID patch = 1 event / 24 participants                                                               |

| Reference                     | Reference number | Extracted Text                                                                                                                                                                                                                                                                                                                                                                                                                                                                                                                                                                                                                                                                                                                               | AEs related to TENS                              | Statement   | Extractable Data | Comment                                                                                                                                                                                                                                                                                                           |
|-------------------------------|------------------|----------------------------------------------------------------------------------------------------------------------------------------------------------------------------------------------------------------------------------------------------------------------------------------------------------------------------------------------------------------------------------------------------------------------------------------------------------------------------------------------------------------------------------------------------------------------------------------------------------------------------------------------------------------------------------------------------------------------------------------------|--------------------------------------------------|-------------|------------------|-------------------------------------------------------------------------------------------------------------------------------------------------------------------------------------------------------------------------------------------------------------------------------------------------------------------|
|                               |                  | reported sleep disturbance. Light somnolence was reported by one patient in the monotherapy group. However, all adverse effects had spontaneously resolved by the end of this study without any treatment. Participants' vital signs were in the normal                                                                                                                                                                                                                                                                                                                                                                                                                                                                                      |                                                  |             |                  | NSAID patch alone = 1 event / 25 participants                                                                                                                                                                                                                                                                     |
| (Kirupa et al., 2019)         | <sup>179</sup>   | No statements present                                                                                                                                                                                                                                                                                                                                                                                                                                                                                                                                                                                                                                                                                                                        | No information to extract                        | N           | N                |                                                                                                                                                                                                                                                                                                                   |
| (Knobel et al., 2005)         | <sup>180</sup>   | In this survey, more than 50% of women reported some discomfort in the use of electrodes type SSP and 25% in the use of electrodes plate type (Tab. 4). In the application of stimulation, no woman reported discomfort in none of the study groups. To assess the effectiveness of this care, therefore, research is needed to reveal the woman's opinion about the method                                                                                                                                                                                                                                                                                                                                                                  | Discomfort during stimulation                    | Y           | N                | No data extracted<br>Discomfort was an outcome measure – comparing two TENS electrodes.<br>We did not consider discomfort as an adverse event in this study                                                                                                                                                       |
| (Koca et al., 2014)           | <sup>181</sup>   | No serious complication was associated with the treatments in any group, and all patients generally tolerated the treatments well. Only two patients in the TENS group experienced mild tenderness at the application site.                                                                                                                                                                                                                                                                                                                                                                                                                                                                                                                  | Mild tenderness                                  | Y           | N                | No numerical data                                                                                                                                                                                                                                                                                                 |
| (Kofotolis et al., 2008)      | <sup>182</sup>   | No statements present                                                                                                                                                                                                                                                                                                                                                                                                                                                                                                                                                                                                                                                                                                                        | No information to extract                        |             | N                |                                                                                                                                                                                                                                                                                                                   |
| (Koke et al., 2004)           | <sup>183</sup>   | During the first period, skin irritation occurred in 9.4% (17/180) of all patients, adherence problems of electrodes in 12.2% (22/180) and problems attaching electrodes in 2.2% (4/180). In four patients, the adverse effects resulted in withdrawal from the study (skin-irritation 2X, problems attaching electrodes 2 X). During the second period, skin irritation was reported by 5.8% (10/171), adherence problems of electrodes 4.7% (8/171), and problems attaching electrodes body 2.9% (5/171). No significant differences in adverse effects were found between groups. At 6 months follow-up, 6 patients (3 in HFT–COT group and 3 in HIT–COT group) reported skin irritation due to TENS, but still could use TENS regularly. | Skin irritation<br>Problems attaching electrodes | Y           | N                | Could not extract data at 6 months follow-up (skin irritation) because could not ascertain the number of participants remaining in each group<br><br>High frequency TENS = 3 events<br>High intensity = 3<br><br>Cross-over study whereby all participants received an active TENS for all possible interventions |
| (Korkmaz et al., 2010)        | <sup>184</sup>   | No serious side-effects or complications were observed in either of the two groups (P>0.05).                                                                                                                                                                                                                                                                                                                                                                                                                                                                                                                                                                                                                                                 | Reported no adverse events                       | Y = 0 tally | N = 0 tally      | No numerical data                                                                                                                                                                                                                                                                                                 |
| (Kumar and Raje, 2014)        | <sup>185</sup>   | No statements present                                                                                                                                                                                                                                                                                                                                                                                                                                                                                                                                                                                                                                                                                                                        | No information to extract                        | N           | N                |                                                                                                                                                                                                                                                                                                                   |
| (Labrecque et al., 1999)      | <sup>186</sup>   | No statements present                                                                                                                                                                                                                                                                                                                                                                                                                                                                                                                                                                                                                                                                                                                        | No information to extract                        | N           | N                |                                                                                                                                                                                                                                                                                                                   |
| (Laitinen and Nuutinen, 1991) | <sup>187</sup>   | No statements present                                                                                                                                                                                                                                                                                                                                                                                                                                                                                                                                                                                                                                                                                                                        | No information to extract                        | N           | N                |                                                                                                                                                                                                                                                                                                                   |
| (Lang et al., 2007)           | <sup>188</sup>   | Because of its simple use and lack of side effects in our study population, we can recommend this technique for pain therapy.                                                                                                                                                                                                                                                                                                                                                                                                                                                                                                                                                                                                                | Reported no adverse events                       | Y           | N = 0 TENS ONLY  | No numerical data                                                                                                                                                                                                                                                                                                 |

| Reference                      | Reference number | Extracted Text                                                                                                                                                                                                                                                                                    | AEs related to TENS                        | Statement   | Extractable Data | Comment                                                                                                                                                                                                                                              |
|--------------------------------|------------------|---------------------------------------------------------------------------------------------------------------------------------------------------------------------------------------------------------------------------------------------------------------------------------------------------|--------------------------------------------|-------------|------------------|------------------------------------------------------------------------------------------------------------------------------------------------------------------------------------------------------------------------------------------------------|
| (Langley et al., 1984)         | <sup>189</sup>   | No adverse side-effects were reported by patients receiving TNS or placebo.                                                                                                                                                                                                                       | Reported no adverse events                 | Y = 0 tally | N = 0 tally      |                                                                                                                                                                                                                                                      |
| (Lauretti et al., 2013)        | <sup>190</sup>   | Concerning adverse effects, 2 patients from the STG got in sleep after the device application and complained of muscle sore due to more than 70-min active device application, which was subsequently improved by local hot application.                                                          | Muscle soreness in TENS group (2 patients) | Y           | N                | Note: the poor English in the quotation is how the text was written!                                                                                                                                                                                 |
| (Lauretti et al., 2015)        | <sup>191</sup>   | In conclusion, the portable TENS device demonstrated to be efficacious for pain relief and improvement of quality of life with no adverse effects for control of menstruation cramp pain.                                                                                                         | Reported no adverse events                 | Y           | N = 0 TENS ONLY  |                                                                                                                                                                                                                                                      |
| (Law and Cheing, 2004)         | <sup>192</sup>   | No statements present                                                                                                                                                                                                                                                                             | No information to extract                  | N           | N                |                                                                                                                                                                                                                                                      |
| (Law et al., 2004)             | <sup>193</sup>   | No statements present                                                                                                                                                                                                                                                                             | No information to extract                  | N           | N                |                                                                                                                                                                                                                                                      |
| (Leandri et al., 1990)         | <sup>194</sup>   | No statements present                                                                                                                                                                                                                                                                             | No information to extract                  | N           | N                |                                                                                                                                                                                                                                                      |
| (Lee et al., 1990)             | <sup>195</sup>   | No negative effects on the mothers and babies were reported.                                                                                                                                                                                                                                      | Reported no adverse events                 | Y = 0 tally | N = 0 tally      |                                                                                                                                                                                                                                                      |
| (Lee et al., 2015)             | <sup>196</sup>   | Neither expected nor unexpected AEs occurred in the study and control groups.                                                                                                                                                                                                                     | Reported no adverse events                 | Y = 0 tally | N = 0 tally      |                                                                                                                                                                                                                                                      |
| (Lee et al., 2019)             | <sup>197</sup>   | No statements present                                                                                                                                                                                                                                                                             | No information to extract                  | N           | N                |                                                                                                                                                                                                                                                      |
| (Leo et al., 1986)             | <sup>198</sup>   | No statements present                                                                                                                                                                                                                                                                             | No information to extract                  | N           | N                |                                                                                                                                                                                                                                                      |
| (Leonard et al., 2011)         | <sup>199</sup>   | No statements present                                                                                                                                                                                                                                                                             | No information to extract                  | N           | N                |                                                                                                                                                                                                                                                      |
| (Lewers et al., 1989)          | <sup>200</sup>   | No statements present                                                                                                                                                                                                                                                                             | No information to extract                  | N           | N                |                                                                                                                                                                                                                                                      |
| (Lewis et al., 1984)           | <sup>201</sup>   | No statements present                                                                                                                                                                                                                                                                             | No information to extract                  | N           | N                | One patient dropped out because of worsening pain.                                                                                                                                                                                                   |
| (Lewis et al., 1994)           | <sup>202</sup>   | No statements present                                                                                                                                                                                                                                                                             | No information to extract                  | N           | N                |                                                                                                                                                                                                                                                      |
| (Likar et al., 2001)           | <sup>203</sup>   | The side effects 1 patient in the Verum group about vomiting, 5 patients in the placebo group suffered from nausea and vomiting that are considered easy and were classified as medium.<br>TENS + analgesics = 1 event / 11 participants<br>Placebo TENS + analgesics = 5 event / 12 participants |                                            | Y           | N                | Data related to nausea and vomiting. Debatably this is related to AE associated with post op drugs rather than TENS.<br>We decided not to extract this data because nausea and vomiting AE of drugs reflects efficacy of TENS rather than AE of TENS |
| (Lim et al., 1983)             | <sup>204</sup>   | No statements present                                                                                                                                                                                                                                                                             | No information to extract                  | N           | N                |                                                                                                                                                                                                                                                      |
| (Lima et al., 2011)            | <sup>205</sup>   | No statements present                                                                                                                                                                                                                                                                             | No information to extract                  | N           | N                |                                                                                                                                                                                                                                                      |
| (Limoges and Rickabaugh, 2004) | <sup>206</sup>   | In addition, no adverse events secondary to TENS use or procedural complications occurred.                                                                                                                                                                                                        | Reported no adverse events                 | Y           | N = 0 TENS ONLY  | No numerical data                                                                                                                                                                                                                                    |
| (Lin et al., 2015)             | <sup>207</sup>   | No statements present                                                                                                                                                                                                                                                                             | No information to extract                  | N           | N                |                                                                                                                                                                                                                                                      |
| (Lin et al., 2019)             | <sup>208</sup>   | First, there were no adverse events (such as discomfort, hematoma, injury, or hyperalgia) throughout this study.                                                                                                                                                                                  | Reported no adverse events                 | Y = 0 tally | N = 0 tally      |                                                                                                                                                                                                                                                      |

| Reference                       | Reference number | Extracted Text                                                                                                                                                                                                                                                                                                                                                                                                                                                                      | AEs related to TENS                                 | Statement   | Extractable Data | Comment                                                                                                            |
|---------------------------------|------------------|-------------------------------------------------------------------------------------------------------------------------------------------------------------------------------------------------------------------------------------------------------------------------------------------------------------------------------------------------------------------------------------------------------------------------------------------------------------------------------------|-----------------------------------------------------|-------------|------------------|--------------------------------------------------------------------------------------------------------------------|
| (Linde et al., 1995)            | <sup>209</sup>   | The most common side effect during TENS treatment is some type of hypersensitivity reaction of the skin. It was mostly seen in slightly underweight patients, in whom contact between skin and electrode was not at its maximum, especially in the area of the TMJ                                                                                                                                                                                                                  | Skin reaction (no other details)                    | Y           | N                | No numerical data                                                                                                  |
| (Linn et al., 1999)             | <sup>210</sup>   | No statements present                                                                                                                                                                                                                                                                                                                                                                                                                                                               | No information to extract                           | N           | N                |                                                                                                                    |
| (Lison et al., 2017)            | <sup>211</sup>   | No patients in either the active or placebo TENS groups reported adverse events such as skin allergy, pain, or burning at the electrode site.                                                                                                                                                                                                                                                                                                                                       | Reported no adverse events                          | Y = 0 tally | N = 0 tally      |                                                                                                                    |
| (Liu et al., 1985)              | <sup>212</sup>   | No statements present                                                                                                                                                                                                                                                                                                                                                                                                                                                               | No information to extract                           | N           | N                |                                                                                                                    |
| (Liu et al., 2017)              | <sup>213</sup>   | During treatment, only 1 patient in the 2-Hz tONS group reported an adverse event. This was intolerance to a form of pinch pain induced by electrical stimulation. However, when the intensity of stimulation was reduced from 10 to 9 mA, the uncomfortable feeling subsided. In the TPM group, 9 of 22 patients experienced (mostly mild) paresthesia, especially of the hands and feet. No other adverse events were reported. tONS = transcutaneous occipital nerve stimulation | Pain at 10mA. Pain lessened when intensity reduced. | Y           | Y                | Data extracted<br>TENS = 1 event / 22 - Pinch pain<br>Topiramate = 9 / 22 - Mild paraesthesia of hands             |
| (Lofgren and Norrbrink, 2009)   | <sup>214</sup>   | In this study few side-effects were reported. Three patients reported increased pain, 2 after TENS and one after warmth.                                                                                                                                                                                                                                                                                                                                                            | Increased pain in 2 patients                        | Y           | Y                | Data extracted (increased pain)<br>TENS = 2 events / 32 participants<br>Warmth therapy = 1 event / 32 participants |
| (Luchesa et al., 2009)          | <sup>215</sup>   | No statements present                                                                                                                                                                                                                                                                                                                                                                                                                                                               | No information to extract                           | N           | N                |                                                                                                                    |
| (Lundeberg, 1984)               | <sup>216</sup>   | No statements present                                                                                                                                                                                                                                                                                                                                                                                                                                                               | No information to extract                           | N           | N                |                                                                                                                    |
| (Lundeberg et al., 1985)        | <sup>217</sup>   | No statements present                                                                                                                                                                                                                                                                                                                                                                                                                                                               | No information to extract                           | N           | N                |                                                                                                                    |
| (Machado et al., 2019)          | <sup>218</sup>   | No statements present                                                                                                                                                                                                                                                                                                                                                                                                                                                               | No information to extract                           | N           | N                |                                                                                                                    |
| (Machin et al., 1988)           | <sup>219</sup>   | No statements present                                                                                                                                                                                                                                                                                                                                                                                                                                                               | No information to extract                           | N           | N                |                                                                                                                    |
| (Mahure et al., 2017)           | <sup>220</sup>   | No TENS machine-related complication, such as localized pain or erythema at the electrode site, occurred in either group of patients.                                                                                                                                                                                                                                                                                                                                               | Reported no adverse events                          | Y           | N = 0 Tally      | No numerical data despite clear statement of no events in both groups                                              |
| (Manigandan et al., 2014)       | <sup>221</sup>   | No statements present                                                                                                                                                                                                                                                                                                                                                                                                                                                               | No information to extract                           | N           | N                |                                                                                                                    |
| (Mannheimer and Carlsson, 1979) | <sup>222</sup>   | No side effects were observed.                                                                                                                                                                                                                                                                                                                                                                                                                                                      | Reported no adverse events                          | Y = 0 tally | N = 0 tally      |                                                                                                                    |
| (Mannheimer and Whalen, 1985)   | <sup>223</sup>   | No statements present                                                                                                                                                                                                                                                                                                                                                                                                                                                               | No information to extract                           | N           | N                |                                                                                                                    |
| (Mannheimer et al., 1978)       | <sup>224</sup>   | No side effects of the treatment were observed. One patient reported that when the pain recurred it was more severe than before TNS, however.                                                                                                                                                                                                                                                                                                                                       | Pain recurred more severe than before TNS           | Y           | N                |                                                                                                                    |
| (Mannheimer et al., 1985)       | <sup>225</sup>   | One patient in the treatment group was excluded because of skin irritation from the electrodes....                                                                                                                                                                                                                                                                                                                                                                                  | Skin irritation                                     | Y           | N                |                                                                                                                    |
| (Mansourian et al., 2019)       | <sup>226</sup>   | No statements present                                                                                                                                                                                                                                                                                                                                                                                                                                                               | No information to extract                           | N           | N                |                                                                                                                    |
| (Mansuri et al., 2019)          | <sup>227</sup>   | No statements present                                                                                                                                                                                                                                                                                                                                                                                                                                                               | No information to extract                           | N           | N                |                                                                                                                    |
| (Mansuri et al., 2020)          | <sup>228</sup>   | No statements present                                                                                                                                                                                                                                                                                                                                                                                                                                                               | No information to extract                           | N           | N                |                                                                                                                    |
| (Marchand et al., 1993)         | <sup>229</sup>   | No statements present                                                                                                                                                                                                                                                                                                                                                                                                                                                               | No information to extract                           | N           | N                |                                                                                                                    |

| Reference                 | Reference number | Extracted Text                                                                                                                                                                                                                                                                                                                                                                                                                                                                                                                                                                                                                                                                                                            | AEs related to TENS                           | Statement   | Extractable Data | Comment                                                                                                                                                             |
|---------------------------|------------------|---------------------------------------------------------------------------------------------------------------------------------------------------------------------------------------------------------------------------------------------------------------------------------------------------------------------------------------------------------------------------------------------------------------------------------------------------------------------------------------------------------------------------------------------------------------------------------------------------------------------------------------------------------------------------------------------------------------------------|-----------------------------------------------|-------------|------------------|---------------------------------------------------------------------------------------------------------------------------------------------------------------------|
| (Mascarin et al., 2012)   | <sup>230</sup>   | No statements present                                                                                                                                                                                                                                                                                                                                                                                                                                                                                                                                                                                                                                                                                                     | No information to extract                     | N           | N                |                                                                                                                                                                     |
| (McCallum et al., 1988)   | <sup>231</sup>   | No statements present                                                                                                                                                                                                                                                                                                                                                                                                                                                                                                                                                                                                                                                                                                     | No information to extract                     | N           | N                |                                                                                                                                                                     |
| (Melzack et al., 1983)    | <sup>232</sup>   | No statements present                                                                                                                                                                                                                                                                                                                                                                                                                                                                                                                                                                                                                                                                                                     | No information to extract                     | N           | N                |                                                                                                                                                                     |
| (Merrill, 1989)           | <sup>233</sup>   | No statements present                                                                                                                                                                                                                                                                                                                                                                                                                                                                                                                                                                                                                                                                                                     | No information to extract                     | N           | N                |                                                                                                                                                                     |
| (Miller et al., 2007)     | <sup>234</sup>   | No statements present                                                                                                                                                                                                                                                                                                                                                                                                                                                                                                                                                                                                                                                                                                     | No information to extract                     | N           | N                |                                                                                                                                                                     |
| (Milsom et al., 1994)     | <sup>235</sup>   | Ten of the 12 women considered the high-intensity transcutaneous nerve stimulation to be painful. However, stimulation lasted only a few seconds, and all the women were prepared to accept again this short period of pain to obtain pain relief from dysmenorrhea.                                                                                                                                                                                                                                                                                                                                                                                                                                                      | Painful at high-intensity stimulation         | Y           | N                |                                                                                                                                                                     |
| (Moharic et al., 2009)    | <sup>236</sup>   | As already indicated in the Methods section, three patients in the pregabalin group experienced such severe somnolence and dizziness that they had to withdraw from the study. Complaints in the combined group beside somnolence and dizziness included peripheral oedema, weight gain, elevated blood glucose values and withdrawal headache, while one patient from the combined group withdrew from the study because of a traffic accident (tractor overturning) caused by somnolence induced (with all likelihood) by pregabalin. In the TENS group, none of the patients reported any local or systemic side effects, neither did they report any problems with continuous TENS application for three hours daily. | Reported no adverse events                    | Y           | Y                | Data extracted (severe somnolence and dizziness)<br>TENS = 0 events / 46 participants<br>Pregabalin alone = 3 events / 8 participants resulting in study withdrawal |
| (Mondal et al., 2019)     | <sup>237</sup>   | No statements present                                                                                                                                                                                                                                                                                                                                                                                                                                                                                                                                                                                                                                                                                                     | No information to extract                     | N           | N                |                                                                                                                                                                     |
| (Moore and Shurman, 1997) | <sup>238</sup>   | No adverse treatment effects were reported and no subject reported the addition of any new pain medication, physical therapy, or other pain-related treatment during the course of their study participation.                                                                                                                                                                                                                                                                                                                                                                                                                                                                                                             | Reported no adverse events                    | Y = 0 tally | N = 0 tally      |                                                                                                                                                                     |
| (Mora et al., 2006)       | <sup>239</sup>   | We can recommend this technique due to its simple use and the lack of side effects in our study population.                                                                                                                                                                                                                                                                                                                                                                                                                                                                                                                                                                                                               | Reported no adverse events                    | Y = 0 tally | N = 0 TENS ONLY  |                                                                                                                                                                     |
| (Morgan et al., 1996)     | <sup>240</sup>   | No statements present                                                                                                                                                                                                                                                                                                                                                                                                                                                                                                                                                                                                                                                                                                     | No information to extract                     | N           | N                |                                                                                                                                                                     |
| (Møystad et al., 1990)    | <sup>241</sup>   | No statements present. TNS may have advantages as a non-invasive method with few side effects that is simple to administer for the patients themselves.                                                                                                                                                                                                                                                                                                                                                                                                                                                                                                                                                                   | No information to extract                     | N           | N                |                                                                                                                                                                     |
| (Murray et al., 2004)     | <sup>242</sup>   | No statements present                                                                                                                                                                                                                                                                                                                                                                                                                                                                                                                                                                                                                                                                                                     | No information to extract                     | N           | N                |                                                                                                                                                                     |
| (Mutlu et al., 2013)      | <sup>243</sup>   | No statements present                                                                                                                                                                                                                                                                                                                                                                                                                                                                                                                                                                                                                                                                                                     | No information to extract                     | N           | N                | There were dropouts to follow-up but no explanation for these.                                                                                                      |
| (Nabi et al., 2015)       | <sup>244</sup>   | The therapeutic methods studied here were well tolerated were not associated with any serious adverse effects. However, skin irritation was reported in a few TENS group subjects.                                                                                                                                                                                                                                                                                                                                                                                                                                                                                                                                        | Skin irritation                               | Y           | N                | No numerical data                                                                                                                                                   |
| (Nash et al., 1990)       | <sup>245</sup>   | The only side effected noted in the series were occasional skin rashes due to allergy to the electrode jelly or fixing tape, and occasional patients had transient increase in pain which settled to previous levels with cessation of treatment.                                                                                                                                                                                                                                                                                                                                                                                                                                                                         | Skin irritation<br>Transient increase in pain | Y           | N                | No numerical data                                                                                                                                                   |

| Reference                                                                                             | Reference number                        | Extracted Text                                                                                                                                                                                                                                                                                                                                                                                                                                                                                                                                                                                 | AEs related to TENS                                                                 | Statement   | Extractable Data | Comment                                                                            |
|-------------------------------------------------------------------------------------------------------|-----------------------------------------|------------------------------------------------------------------------------------------------------------------------------------------------------------------------------------------------------------------------------------------------------------------------------------------------------------------------------------------------------------------------------------------------------------------------------------------------------------------------------------------------------------------------------------------------------------------------------------------------|-------------------------------------------------------------------------------------|-------------|------------------|------------------------------------------------------------------------------------|
| (Navarathnam et al., 1984)                                                                            | <sup>246</sup>                          | Some of the patients in both groups developed blisters around the electrode edges in the distribution of the adhesives. In addition, two patients developed small areas of pressure necrosis in the region of the lumbosacral electrodes which might be avoided by more attention to posture of the patients with these electrodes.                                                                                                                                                                                                                                                            | Skin irritation<br>Lumbosacral pressure necrosis                                    | Y           | N                | No numerical data                                                                  |
| (Neary, 1981)                                                                                         | <sup>247</sup>                          | No cases of infection or skin reaction were observed. TENS did not mask the pain symptoms from complications.                                                                                                                                                                                                                                                                                                                                                                                                                                                                                  | Reported no adverse events                                                          | Y = 0 tally | N = 0 tally      |                                                                                    |
| (Neighbours et al., 1987)                                                                             | <sup>248</sup>                          | No statements present                                                                                                                                                                                                                                                                                                                                                                                                                                                                                                                                                                          | No information to extract                                                           | N           | N                |                                                                                    |
| (Nesheim, 1981)                                                                                       | <sup>249</sup>                          | No statements present                                                                                                                                                                                                                                                                                                                                                                                                                                                                                                                                                                          | No information to extract                                                           | N           | N                |                                                                                    |
| (Neumark et al., 1978)                                                                                | <sup>250</sup>                          | No statements present                                                                                                                                                                                                                                                                                                                                                                                                                                                                                                                                                                          | No information to extract                                                           | N           | N                |                                                                                    |
| (Ng et al., 2003)                                                                                     | <sup>251</sup>                          | No statements present                                                                                                                                                                                                                                                                                                                                                                                                                                                                                                                                                                          | No information to extract                                                           | N           | N                |                                                                                    |
| (Nordemar and Thorner, 1981)                                                                          | <sup>252</sup>                          | No statements present                                                                                                                                                                                                                                                                                                                                                                                                                                                                                                                                                                          | No information to extract                                                           | N           | N                |                                                                                    |
| (Norrbrink, 2009)                                                                                     | <sup>253</sup>                          | Three patients experienced discomfort or increased pain during treatment, and one patient experienced local muscle spasms.                                                                                                                                                                                                                                                                                                                                                                                                                                                                     | Increased pain during treatment<br>Local muscle spasms                              | Y           | N                | No numerical data<br>Unclear which group experienced side effects                  |
| (Olsén et al., 2007)                                                                                  | <sup>254</sup>                          | No adverse effects except for discomfort during stimulation were recorded. Discomfort from the stimulation itself was greater in the HI TENS group than in the LI TENS group (pB/0.01). In the HI TENS group, two women experienced severe discomfort, two women experienced moderate discomfort, five women experienced mild discomfort, and two women experienced no discomfort. Seven women in the LI TENS group experienced no discomfort and one woman experienced mild discomfort from the stimulation given. No adverse effects except for discomfort during stimulation were recorded. | Discomfort during stimulation                                                       | Y           | N                | No numerical data other than stimulation discomfort<br>Decided not to extract this |
| (Fagevik Olsen et al., 2019)                                                                          | <sup>255</sup>                          | No statements present                                                                                                                                                                                                                                                                                                                                                                                                                                                                                                                                                                          | No information to extract                                                           | N           | N                | Dropouts recorded but reasons not given                                            |
| (Oncel et al., 2002)                                                                                  | <sup>256</sup>                          | No complications due to TENS therapy or Naproxen sodium were seen during the study.                                                                                                                                                                                                                                                                                                                                                                                                                                                                                                            | Reported no adverse events                                                          | Y = 0 tally | N = 0 tally      |                                                                                    |
| (Oosterhof et al., 2006)                                                                              | <sup>257</sup>                          | No statements present in <sup>257</sup> .<br>No statements present in secondary report <sup>259</sup>                                                                                                                                                                                                                                                                                                                                                                                                                                                                                          | Skin irritation                                                                     | Y           | N                | No numerical data                                                                  |
| Secondary reports<br>(Oosterhof et al., 2008,<br>Oosterhof et al., 2012a,<br>Oosterhof et al., 2012b) | Secondary reports<br><sup>258-260</sup> | Secondary report - <sup>260</sup><br>Skin irritation occurred at some time point in half of the patients but could easily be cured by changing the type of electrode, except for 4 patients who had to stop treatment. Because there was no difference between TENS and sham TENS, we assume there was no interaction of the electric current with electrode material, which has been suggested.                                                                                                                                                                                               |                                                                                     |             |                  |                                                                                    |
| (Ordog, 1987)                                                                                         | <sup>261</sup>                          | No complications of treatment were found. No side effects were reported, except a mild tingling sensation at higher TENS-PAC® output levels.                                                                                                                                                                                                                                                                                                                                                                                                                                                   | Reported no adverse events<br>Mild tingling sensation is part of the TENS treatment | Y = 0 tally | N = 0 TENS ONLY  |                                                                                    |



| Reference                                                                | Reference number                                     | Extracted Text                                                                                                                                                                                                                                                                                                                                    | AEs related to TENS                      | Statement   | Extractable Data | Comment                                                                                         |
|--------------------------------------------------------------------------|------------------------------------------------------|---------------------------------------------------------------------------------------------------------------------------------------------------------------------------------------------------------------------------------------------------------------------------------------------------------------------------------------------------|------------------------------------------|-------------|------------------|-------------------------------------------------------------------------------------------------|
|                                                                          |                                                      | Overall, 20% of the patients reported this effect, but none had to discontinue usage of the TENS-PAC® because of it.                                                                                                                                                                                                                              |                                          |             |                  |                                                                                                 |
| (Ozkaraoglu et al., 2020)                                                | <sup>262</sup>                                       | No statements present                                                                                                                                                                                                                                                                                                                             | No information to extract                | N           | N                |                                                                                                 |
| (Ozkul et al., 2015)                                                     | <sup>263</sup>                                       | No unwanted effects occurred during the application of both treatments.                                                                                                                                                                                                                                                                           | Reported no adverse events               | Y = 0 tally | N = 0 tally      |                                                                                                 |
| (Oztas and Iyigun, 2019)                                                 | <sup>264</sup>                                       | No statements present                                                                                                                                                                                                                                                                                                                             | No information to extract                | N           | N                |                                                                                                 |
| (Ozturk et al., 2016)                                                    | <sup>265</sup>                                       | No statements present                                                                                                                                                                                                                                                                                                                             | No information to extract                | N           | N                |                                                                                                 |
| (Padma et al., 2000)                                                     | <sup>266</sup>                                       | In the present study, no side effects were noted, and the stimulation was acceptable to all the patients, but the willingness to accept TENS as a mode of relief was equivocal.                                                                                                                                                                   | Reported no adverse events               | Y = 0 tally | N = 0 TENS ONLY  |                                                                                                 |
| (Paker et al., 2006)                                                     | <sup>267</sup>                                       | In the present study, no serious adverse effects were reported in the intra-articular hyaluron group or in the TENS group.                                                                                                                                                                                                                        | Reported no adverse events               | Y           | N = 0 Tally      | One dropout due to worsening pain – not attributable to treatment                               |
| (Palmer et al., 2014)                                                    | <sup>268</sup>                                       | No statements present                                                                                                                                                                                                                                                                                                                             | No information to extract                | N           | N                |                                                                                                 |
| (Pan et al., 2003)                                                       | <sup>269</sup>                                       | Five patients complained of soreness in the upper arm after ESWT, but this soreness had subsided before their next visit. One patient had cardiac palpitations during the first ESWT session as a result of anxiety but was calm after taking a break. Otherwise, no specific side effect (e.g., hematoma, paresthesia) occurred in either group. | No adverse events recorded in TENS group | Y           | Y                | Extractable data: (soreness) TENS = 0 events /30 participants ESWT = 5 events / 33 participants |
| (Park et al., 2015)                                                      | <sup>270</sup>                                       | No adverse reactions related to TENS were observed.                                                                                                                                                                                                                                                                                               | Reported no adverse events               | Y           | N = 0 TENS ONLY  | No numerical data                                                                               |
| (Patil and Aileni, 2017)                                                 | <sup>271</sup>                                       | No statements present                                                                                                                                                                                                                                                                                                                             | No information to extract                | N           | N                |                                                                                                 |
| (Peacock et al., 2019)                                                   | <sup>272</sup>                                       | ... and no adverse events were reported in relation to the administration of the Biomodulator, traditional Chinese acupuncture, or TENS device in the study.                                                                                                                                                                                      | Reported no adverse events               | Y = 0 tally | N = 0 tally      | No numerical data                                                                               |
| (Pietrosimone et al., 2009)                                              | <sup>273</sup>                                       | No statements present                                                                                                                                                                                                                                                                                                                             | No information to extract                | N           | N                |                                                                                                 |
| (Pietrosimone et al., 2011) Secondary Report (Pietrosimone et al., 2010) | <sup>274</sup><br>Secondary Report<br><sup>275</sup> | No adverse events were reported to the study personnel regarding TENS or placebo usage.                                                                                                                                                                                                                                                           | Reported no adverse events               | Y = 0 tally | N = 0 tally      |                                                                                                 |
| (Pietrosimone et al., 2020)                                              | <sup>276</sup>                                       | No statements present                                                                                                                                                                                                                                                                                                                             | No information to extract                | N           | N                |                                                                                                 |
| (Pike, 1978)                                                             | <sup>277</sup>                                       | The duration of stimulation, whether intermittent or continuous, is unimportant since neither tachyphylaxis nor side-effects occurred.                                                                                                                                                                                                            | Reported no adverse events               | Y           | N = 0 TENS ONLY  | No numerical data                                                                               |
| (Pitangui et al., 2012)                                                  | <sup>278</sup>                                       | No reports of side effects or dissatisfaction were made, supporting the results of other studies.                                                                                                                                                                                                                                                 | Reported no adverse events               | Y = 0 tally | N = 0 tally      |                                                                                                 |

| Reference                      | Reference number | Extracted Text                                                                                                                                                                                                                                                                                                                                                                                                                                                                                                                    | AEs related to TENS                           | Statement   | Extractable Data | Comment                                                                                     |
|--------------------------------|------------------|-----------------------------------------------------------------------------------------------------------------------------------------------------------------------------------------------------------------------------------------------------------------------------------------------------------------------------------------------------------------------------------------------------------------------------------------------------------------------------------------------------------------------------------|-----------------------------------------------|-------------|------------------|---------------------------------------------------------------------------------------------|
| (Pitangui et al., 2014)        | <sup>279</sup>   | HFT and LFT are safe and effective resources without side effects and presenting good acceptance.....                                                                                                                                                                                                                                                                                                                                                                                                                             | Reported no adverse events                    | Y = 0 tally | N = 0 tally      |                                                                                             |
| (Platon et al., 2010)          | <sup>280</sup>   | The only reported side effect of TENS during the study was discomfort during 1 min of the initial stimulation, which was noticed in some patients.                                                                                                                                                                                                                                                                                                                                                                                | Slight discomfort during stimulation          | Y           | N                | No numerical data                                                                           |
| (Platon et al., 2018)          | <sup>281</sup>   | Some patients reported an uncomfortable stimulation during the 1 min of the initial stimulation with TENS as a side effect.                                                                                                                                                                                                                                                                                                                                                                                                       | Slight discomfort during stimulation          | Y           | N                | No numerical data                                                                           |
| (Prabhakar and Ramteke, 2011)  | <sup>282</sup>   | No statements present                                                                                                                                                                                                                                                                                                                                                                                                                                                                                                             | No information to extract                     | N           | N                |                                                                                             |
| (Presser et al., 2000)         | <sup>283</sup>   | No statements present                                                                                                                                                                                                                                                                                                                                                                                                                                                                                                             | No information to extract                     | N           | N                |                                                                                             |
| (Rainov et al., 1994)          | <sup>284</sup>   | No statements present                                                                                                                                                                                                                                                                                                                                                                                                                                                                                                             | No information to extract                     | N           | N                |                                                                                             |
| (Rajfur et al., 2017)          | <sup>285</sup>   | No statements present                                                                                                                                                                                                                                                                                                                                                                                                                                                                                                             | No information to extract                     | N           | N                |                                                                                             |
| (Rajpurohit et al., 2010)      | <sup>286</sup>   | No statements present                                                                                                                                                                                                                                                                                                                                                                                                                                                                                                             | No information to extract                     | N           | N                |                                                                                             |
| (Rakel and Frantz, 2003)       | <sup>287</sup>   | No statements present                                                                                                                                                                                                                                                                                                                                                                                                                                                                                                             | No information to extract                     | N           | N                |                                                                                             |
| (Rakel et al., 2014)           | <sup>288</sup>   | No statements present                                                                                                                                                                                                                                                                                                                                                                                                                                                                                                             | No information to extract                     | N           | N                |                                                                                             |
| (Ramanathan et al., 2017)      | <sup>289</sup>   | Consort identifies lost to follow due to AE in TENS and placebo group – but numerical data not clear<br>Of note, 11 patients (9.48%) reported popular rash and/or cutaneous blistering around the placement site of adhesive electrodes.....<br>Two patients were withdrawn for persistent cutaneous blistering.<br>Other reasons for withdrawal were ... and skin hypersensitivity to adhesive electrodes (n=3, 6.81%)<br>Authors note that withdrawals due to 'device-related discomfort' were in the active group (n=3 6.81%). | Skin irritation/blistering at electrode sites | Y           | N                | No data extracted because no clear numerical data between the different intervention groups |
| (Ramos et al., 2018)           | <sup>290</sup>   | No statements present                                                                                                                                                                                                                                                                                                                                                                                                                                                                                                             | No information to extract                     | N           | N                |                                                                                             |
| (Rani et al., 2020)            | <sup>291</sup>   | No statements present                                                                                                                                                                                                                                                                                                                                                                                                                                                                                                             | No information to extract                     | N           | N                |                                                                                             |
| (Ratajczak et al., 2011)       | <sup>292</sup>   | No statements present                                                                                                                                                                                                                                                                                                                                                                                                                                                                                                             | No information to extract                     | N           | N                |                                                                                             |
| (Rawat et al., 1991)           | <sup>293</sup>   | No statements present                                                                                                                                                                                                                                                                                                                                                                                                                                                                                                             | No information to extract                     | N           | N                |                                                                                             |
| (Renovato França et al., 2019) | <sup>294</sup>   | No adverse events were observed in this study.                                                                                                                                                                                                                                                                                                                                                                                                                                                                                    | Reported no adverse events                    | Y = 0 tally | N = 0 tally      |                                                                                             |
| (Reuss et al., 1988)           | <sup>295</sup>   | No statements present                                                                                                                                                                                                                                                                                                                                                                                                                                                                                                             | No information to extract                     | N           | N                |                                                                                             |
| (Revadkar and Bhojwani, 2019)  | <sup>296</sup>   | No statements present                                                                                                                                                                                                                                                                                                                                                                                                                                                                                                             | No information to extract                     | N           | N                |                                                                                             |
| (Ringel and Taubert, 1991)     | <sup>297</sup>   | No statements present                                                                                                                                                                                                                                                                                                                                                                                                                                                                                                             | No information to extract                     | N           | N                |                                                                                             |
| (Robb et al., 2007)            | <sup>298</sup>   | No statements present                                                                                                                                                                                                                                                                                                                                                                                                                                                                                                             | No information to extract                     | N           | N                |                                                                                             |
| (Robinson et al., 2001)        | <sup>299</sup>   | No statements present                                                                                                                                                                                                                                                                                                                                                                                                                                                                                                             | No information to extract                     | N           | N                |                                                                                             |
| (Roche et al., 1985)           | <sup>300</sup>   | No statements present                                                                                                                                                                                                                                                                                                                                                                                                                                                                                                             | No information to extract                     | N           | N                |                                                                                             |
| (Rooney et al., 1983)          | <sup>301</sup>   | No statements present. Authors state that TENS is 'safe' in the conclusion. No further info.                                                                                                                                                                                                                                                                                                                                                                                                                                      | No information to extract                     | N           | N                |                                                                                             |
| (Rosenberg et al., 1978)       | <sup>302</sup>   | No complications were observed in this study from the use of TENS and the only morbidity reported has involved skin reactions at the electrode sites                                                                                                                                                                                                                                                                                                                                                                              | Skin reaction at electrode sites              | Y           | N                | No numerical data                                                                           |
| (Rutgers et al., 1988)         | <sup>303</sup>   | No statements present                                                                                                                                                                                                                                                                                                                                                                                                                                                                                                             | No information to extract                     | N           | N                |                                                                                             |

| Reference                       | Reference number | Extracted Text                                                                                                                                                                                                                                                                                                                                                                                                                                                                                                                                                                                                               | AEs related to TENS                                                                              | Statement   | Extractable Data | Comment                                                                                                                                                                                                                                                                                                                                                        |
|---------------------------------|------------------|------------------------------------------------------------------------------------------------------------------------------------------------------------------------------------------------------------------------------------------------------------------------------------------------------------------------------------------------------------------------------------------------------------------------------------------------------------------------------------------------------------------------------------------------------------------------------------------------------------------------------|--------------------------------------------------------------------------------------------------|-------------|------------------|----------------------------------------------------------------------------------------------------------------------------------------------------------------------------------------------------------------------------------------------------------------------------------------------------------------------------------------------------------------|
| (Sadala et al., 2018)           | <sup>304</sup>   | No statements present                                                                                                                                                                                                                                                                                                                                                                                                                                                                                                                                                                                                        | No information to extract                                                                        | N           | N                |                                                                                                                                                                                                                                                                                                                                                                |
| (Sahin et al., 2011)            | <sup>305</sup>   | No statements present                                                                                                                                                                                                                                                                                                                                                                                                                                                                                                                                                                                                        | No information to extract                                                                        | N           | N                |                                                                                                                                                                                                                                                                                                                                                                |
| (Samadzadeh et al., 2017)       | <sup>306</sup>   | No statements present                                                                                                                                                                                                                                                                                                                                                                                                                                                                                                                                                                                                        | No information to extract                                                                        | N           | N                | States in conclusion that TENS is safe but no info on adverse events in main text.                                                                                                                                                                                                                                                                             |
| (Sangtong et al., 2019)         | <sup>307</sup>   | Table 3 shows adverse events, patient global assessment, and patient satisfaction after treatment. More subjects in the study group had increased knee swelling than subjects in the control group (four patients (6.3%) vs. two patients (2.9%), respectively), but no significant difference ( $P = 0.430$ ). Table 3 of their report                                                                                                                                                                                                                                                                                      | Joint swelling<br>Rash                                                                           | Y           | Y                | Data extracted (joint swelling and skin rash)<br>TENS + US = 4 events / 64 participants<br>US alone = 3 events / 68 participants                                                                                                                                                                                                                               |
| (Santamato et al., 2013)        | <sup>308</sup>   | None of the patients reported adverse effects during the study period.                                                                                                                                                                                                                                                                                                                                                                                                                                                                                                                                                       | Reported no adverse events                                                                       | Y = 0 tally | N = 0 tally      |                                                                                                                                                                                                                                                                                                                                                                |
| (Santana et al., 2016)          | <sup>309</sup>   | No statements present                                                                                                                                                                                                                                                                                                                                                                                                                                                                                                                                                                                                        | No information to extract                                                                        | N           | N                |                                                                                                                                                                                                                                                                                                                                                                |
| (Saranya et al., 2019)          | <sup>310</sup>   | No statements present                                                                                                                                                                                                                                                                                                                                                                                                                                                                                                                                                                                                        | No information to extract                                                                        | N           | N                |                                                                                                                                                                                                                                                                                                                                                                |
| (Sayilir and Yildizgoren, 2017) | <sup>311</sup>   | No statements present                                                                                                                                                                                                                                                                                                                                                                                                                                                                                                                                                                                                        | No information to extract                                                                        | N           | N                |                                                                                                                                                                                                                                                                                                                                                                |
| (Seo et al., 2013)              | <sup>312</sup>   | A total of 7 adverse events that required admission in 6 participants were reported during the study. The adverse events included a traffic accident, acute appendicitis, cellulitis, worsening of lower back pain, shoulder pain, uterine myoma, and spontaneous abortion. There was a possible relationship between the treatment and spontaneous abortion ... that occurred 21 days after BTX-A injection and electrical stimulation. She answered "no" to the question "Are you pregnant or do you have a plan for pregnancy?" before study enrolment. The other events were not related to the treatment in this study. | Spontaneous abortion possibly related to treatment. Other adverse events unrelated to treatment. | Y           | N                | Numerical data not necessarily related to TENS/intervention                                                                                                                                                                                                                                                                                                    |
| (Serry et al., 2016)            | <sup>313</sup>   | No statements present                                                                                                                                                                                                                                                                                                                                                                                                                                                                                                                                                                                                        | No information to extract                                                                        | N           | N                |                                                                                                                                                                                                                                                                                                                                                                |
| (Sezen et al., 2017)            | <sup>314</sup>   | We observed a small number of complications in the patients who were administered TENS in our study, but there was no statistically significant difference between the two groups. Table 4 of their report                                                                                                                                                                                                                                                                                                                                                                                                                   | Authors do not say whether complications were felt to be due to TENS                             | Y           | N                | Data related to post-operative complications. Debatably this is related to AE associated with op procedures rather than TENS.<br>We decided not to extract this data because AE from operation reflects efficacy of TENS rather than AE of TENS<br><br>Not extracted data (complications)<br>TENS (T) = 6 events / 43<br>Control placebo TENS = 10 events / 44 |

| Reference                     | Reference number | Extracted Text                                                                                                                                                                                                                                                                                                                                                                                                                                                                                                                                                                                                                                                                                                                                                                                                                                        | AEs related to TENS                                 | Statement   | Extractable Data | Comment                                                                                                                               |
|-------------------------------|------------------|-------------------------------------------------------------------------------------------------------------------------------------------------------------------------------------------------------------------------------------------------------------------------------------------------------------------------------------------------------------------------------------------------------------------------------------------------------------------------------------------------------------------------------------------------------------------------------------------------------------------------------------------------------------------------------------------------------------------------------------------------------------------------------------------------------------------------------------------------------|-----------------------------------------------------|-------------|------------------|---------------------------------------------------------------------------------------------------------------------------------------|
|                               |                  |                                                                                                                                                                                                                                                                                                                                                                                                                                                                                                                                                                                                                                                                                                                                                                                                                                                       |                                                     |             |                  | Not definitely attributed to the intervention                                                                                         |
| (Shahoei et al., 2017)        | <sup>315</sup>   | No statements present<br>... Since it has no negative consequences for mothers and their fetus, it is considered a safe pain relief method.                                                                                                                                                                                                                                                                                                                                                                                                                                                                                                                                                                                                                                                                                                           | No information to extract                           | N           | N                |                                                                                                                                       |
| (Shehab and Adham, 2000)      | <sup>316</sup>   | No statements present                                                                                                                                                                                                                                                                                                                                                                                                                                                                                                                                                                                                                                                                                                                                                                                                                                 | No information to extract                           | N           | N                |                                                                                                                                       |
| (Sherry et al., 2001)         | <sup>317</sup>   | No statements present                                                                                                                                                                                                                                                                                                                                                                                                                                                                                                                                                                                                                                                                                                                                                                                                                                 | No information to extract                           | N           | N                |                                                                                                                                       |
| (Shimoji et al., 2007)        | <sup>318</sup>   | There were three cases of skin flash at sites of electrode placement in subjects treated with TENS using CPWs, but these disappeared within a day without intervention. No such skin irritation occurred in subjects who received TENS using BMWs. No other complications were reported in both groups.<br>There was also a sham TENS group but no mention of AEs/complications                                                                                                                                                                                                                                                                                                                                                                                                                                                                       | 'Skin flash' (3 cases) in CPW group                 | Y           | Y                | Data extracted (skin irritation) TENS (CPWs) = 3 / 9<br>BMWs (bidirectional modulated sine waves) = 0 events / 11                     |
| (Shimoura et al., 2019)       | <sup>319</sup>   | No adverse effect was noted with the TENS or sham-TENS treatment.                                                                                                                                                                                                                                                                                                                                                                                                                                                                                                                                                                                                                                                                                                                                                                                     | Reported no adverse events                          | Y = 0 tally | N = 0 tally      |                                                                                                                                       |
| (Shoukry and Al-Ansary, 2019) | <sup>320</sup>   | Adverse effect during or after the procedure was recorded and treated. Table 3 shows that adverse effects [were significantly less frequent among group-A [TENS + i.v. fentanyl] compared to group-B [i.v. fentanyl]. These statements relate to adverse effects associated with ESWT procedure rather than TENS                                                                                                                                                                                                                                                                                                                                                                                                                                                                                                                                      | O2 desaturation<br>Nausea and vomiting<br>Dizziness | N           |                  | The data provides information about effect of TENS on incidence of adverse events associated with ESWT procedure + fentanyl treatment |
| (Siemens et al., 2020)        | <sup>321</sup>   | Two patients experienced an uncomfortable feeling caused by the current, one after IMT and one after PBT<br><br>One out of 20 (5%) patients perceived the electric current as uncomfortable after the IMT phase and 1/20 (5%) after the PBT phase. No other TENS-related adverse events were reported. Four patients (20%) generally criticized that cables were impractical and one (5%) patient felt disturbed by the electrodes. After testing both TENS modes, 7/20 (35%) patients requested a prescription for the TENS device in order to use TENS after discharge.<br><br>A usability problem rather than a safety problem was the fact that the main reason for stopping the study after period 2 was the burden in using TENS (5/15, 33%), e.g., because of the disturbing cables of the device (see Online Resource 5 for further reasons). |                                                     | N           | N                | Frequency data between placebo and TENS interventions not provided                                                                    |
| (Sikiru et al., 2008)         | <sup>322</sup>   | The results demonstrated a significant decrease in the NIH-CPSI (P = 0.0002) with no urethral, anal complaints or other side effects                                                                                                                                                                                                                                                                                                                                                                                                                                                                                                                                                                                                                                                                                                                  | Reported no adverse events                          | Y = 0 tally | N = 0 tally      |                                                                                                                                       |
| (Silva et al., 2012)          | <sup>323</sup>   | No statements present                                                                                                                                                                                                                                                                                                                                                                                                                                                                                                                                                                                                                                                                                                                                                                                                                                 | No information to extract                           | N           | N                |                                                                                                                                       |
| (Silva et al., 2014)          | <sup>324</sup>   | No statements present                                                                                                                                                                                                                                                                                                                                                                                                                                                                                                                                                                                                                                                                                                                                                                                                                                 | No information to extract                           | N           | N                |                                                                                                                                       |
| (Sim, 1991)                   | <sup>325</sup>   | No statements present                                                                                                                                                                                                                                                                                                                                                                                                                                                                                                                                                                                                                                                                                                                                                                                                                                 | No information to extract                           | N           | N                |                                                                                                                                       |
| (Siqueira et al., 2019)       | <sup>326</sup>   | No statements present                                                                                                                                                                                                                                                                                                                                                                                                                                                                                                                                                                                                                                                                                                                                                                                                                                 | No information to extract                           | N           | N                |                                                                                                                                       |
| (Sloan et al., 1986)          | <sup>327</sup>   | No statements present                                                                                                                                                                                                                                                                                                                                                                                                                                                                                                                                                                                                                                                                                                                                                                                                                                 | No information to extract                           | N           | N                |                                                                                                                                       |

| Reference                     | Reference number | Extracted Text                                                                                                                                                                                                                                        | AEs related to TENS           | Statement | Extractable Data   | Comment                                                                                                                                                                                                                                                                                          |
|-------------------------------|------------------|-------------------------------------------------------------------------------------------------------------------------------------------------------------------------------------------------------------------------------------------------------|-------------------------------|-----------|--------------------|--------------------------------------------------------------------------------------------------------------------------------------------------------------------------------------------------------------------------------------------------------------------------------------------------|
| (Smania et al., 2005)         | <sup>328</sup>   | No statements present                                                                                                                                                                                                                                 | No information to extract     | N         | N                  | There was data missing from final analysis but no explanation given                                                                                                                                                                                                                              |
| (Smedley et al., 1988)        | <sup>329</sup>   | No statements present                                                                                                                                                                                                                                 | No information to extract     | N         | N                  |                                                                                                                                                                                                                                                                                                  |
| (Smith et al., 1983)          | <sup>330</sup>   | Only one patient noticed any adverse effects from the treatment, a mild skin reaction to the electrode jelly.                                                                                                                                         | Skin irritation in 1 patient. | Y         | N                  | No numerical data to extract                                                                                                                                                                                                                                                                     |
| (Smith et al., 1986)          | <sup>331</sup>   | No statements present                                                                                                                                                                                                                                 | No information to extract     | N         | N                  |                                                                                                                                                                                                                                                                                                  |
| (Sodipo et al., 1980)         | <sup>332</sup>   | No statements present                                                                                                                                                                                                                                 | No information to extract     | N         | N                  |                                                                                                                                                                                                                                                                                                  |
| (Solak et al., 2007)          | <sup>333</sup>   | No statements present                                                                                                                                                                                                                                 | No information to extract     | N         | N                  |                                                                                                                                                                                                                                                                                                  |
| (Solak et al., 2009)          | <sup>334</sup>   | No statements present                                                                                                                                                                                                                                 | No information to extract     | N         | N                  |                                                                                                                                                                                                                                                                                                  |
| (Sonde et al., 1998)          | <sup>335</sup>   | No statements present                                                                                                                                                                                                                                 | No information to extract     | N         | N                  |                                                                                                                                                                                                                                                                                                  |
| (Stepanovic et al., 2015)     | <sup>336</sup>   | Adverse effects were associated with a specific treatment of herpes zoster ( $n = 5$ ) and analgesics prescribed ( $n = 20$ ). Most common complication was a bacterial superinfection, in either group there was no serious complication.            | Reported no adverse events    | Y         | N = 0<br>TENS ONLY |                                                                                                                                                                                                                                                                                                  |
| (Steptoe and Bo, 1984)        | <sup>337</sup>   | TENS is almost free from adverse events                                                                                                                                                                                                               | No information to extract     | N         | N                  |                                                                                                                                                                                                                                                                                                  |
| (Stratton and Smith, 1980)    | <sup>338</sup>   | No statements present                                                                                                                                                                                                                                 | No information to extract     | N         | N                  |                                                                                                                                                                                                                                                                                                  |
| (Stubbing and Jellicoe, 1988) | <sup>339</sup>   | No statements present                                                                                                                                                                                                                                 | No information to extract     | N         | N                  |                                                                                                                                                                                                                                                                                                  |
| (Suh et al., 2015)            | <sup>340</sup>   | No statements present                                                                                                                                                                                                                                 | No information to extract     | N         | N                  |                                                                                                                                                                                                                                                                                                  |
| (Talbot et al., 2020)         | <sup>341</sup>   | No statements present                                                                                                                                                                                                                                 | No information to extract     | N         | N                  |                                                                                                                                                                                                                                                                                                  |
| (Tantawy et al., 2018)        | <sup>342</sup>   | No statements present                                                                                                                                                                                                                                 | No information to extract     | N         | N                  |                                                                                                                                                                                                                                                                                                  |
| (Taylor et al., 1981)         | <sup>343</sup>   | No statements present                                                                                                                                                                                                                                 | No information to extract     | N         | N                  |                                                                                                                                                                                                                                                                                                  |
| (Taylor et al., 1983)         | <sup>344</sup>   | No statements present                                                                                                                                                                                                                                 | No information to extract     | N         | N                  |                                                                                                                                                                                                                                                                                                  |
| (Thakur and Patidar, 2004)    | <sup>345</sup>   | Side effects were more in the tramadol group in the form of nausea 7%, vomiting 3%, drowsiness 2% and fetal distress 2%, what while in the control group only one percent had fetal distress. Intense group none had any side effects Data in Table 6 | Reported no adverse events    | Y         | Y                  | Data extracted<br>TENS = 0 events / 100<br>Control (no intervention) = 1 event / 100 participants (Fetal distress)<br><br>Also: Tramadol = 14 / 100 participants (nausea, vomiting, drowsiness, fetal distress)<br>– did not add to forest plot to prevent double counting in sub group analysis |
| (Thomas et al., 1988)         | <sup>346</sup>   | No statements present                                                                                                                                                                                                                                 | No information to extract     | N         | N                  |                                                                                                                                                                                                                                                                                                  |
| (Thomas et al., 1995)         | <sup>347</sup>   | No statements present                                                                                                                                                                                                                                 | No information to extract     | N         | N                  |                                                                                                                                                                                                                                                                                                  |
| (Thorsteinsson et al., 1978)  | <sup>348</sup>   | No statements present                                                                                                                                                                                                                                 | No information to extract     | N         | N                  |                                                                                                                                                                                                                                                                                                  |
| (Tilak et al., 2016)          | <sup>349</sup>   | No statements present                                                                                                                                                                                                                                 | No information to extract     | N         | N                  |                                                                                                                                                                                                                                                                                                  |

| Reference                   | Reference number | Extracted Text                                                                                                                                                                                                                                                                                                                                                                                                                                                                                                  | AEs related to TENS                                                | Statement   | Extractable Data | Comment                                                                                                                                             |
|-----------------------------|------------------|-----------------------------------------------------------------------------------------------------------------------------------------------------------------------------------------------------------------------------------------------------------------------------------------------------------------------------------------------------------------------------------------------------------------------------------------------------------------------------------------------------------------|--------------------------------------------------------------------|-------------|------------------|-----------------------------------------------------------------------------------------------------------------------------------------------------|
| (Tokuda et al., 2014)       | <sup>350</sup>   | We observed no side effects; thus, TENS may be particularly useful for patients who have liver or kidney disease considering that analgesics are excreted through the kidney.                                                                                                                                                                                                                                                                                                                                   | Reported no adverse events                                         | Y = 0 tally | N = 0 tally      |                                                                                                                                                     |
| (Tonella et al., 2006)      | <sup>351</sup>   | No statements present                                                                                                                                                                                                                                                                                                                                                                                                                                                                                           | No information to extract                                          |             | N                |                                                                                                                                                     |
| (Topuz et al., 2004)        | <sup>352</sup>   | No statements present                                                                                                                                                                                                                                                                                                                                                                                                                                                                                           | No information to extract                                          | N           | N                |                                                                                                                                                     |
| (Tosato et al., 2007)       | <sup>353</sup>   | No statements present                                                                                                                                                                                                                                                                                                                                                                                                                                                                                           | No information to extract                                          | N           | N                |                                                                                                                                                     |
| (Treacy, 1999)              | <sup>354</sup>   | No statements present                                                                                                                                                                                                                                                                                                                                                                                                                                                                                           | No information to extract                                          | N           | N                |                                                                                                                                                     |
| (Tsen et al., 2000)         | <sup>355</sup>   | Some have raised the concern that TENS could interfere with fetal heart rate tracings,1 1 however, this was not witnessed in our review of fetal tracings, nor did we observe any incidents of non-reassuring fetal tracings2 4 subsequent to the CSE placement in either group.                                                                                                                                                                                                                                | Reported no adverse events.                                        | Y = 0 tally | N = 0 tally      |                                                                                                                                                     |
| (Tsen et al., 2001)         | <sup>356</sup>   | No statements present                                                                                                                                                                                                                                                                                                                                                                                                                                                                                           | No information to extract                                          | N           | N                | Authors stated they would record adverse events but no comments included in results or discussion.                                                  |
| (Tsukayama et al., 2002)    | <sup>357</sup>   | No adverse events were reported by the evaluator. The therapists reported some transient adverse events, for the EA group: transient aggravation of LBP (1 case), discomfort due to press tack needles (1 case), pain on needle insertion (1 case) and small subcutaneous bleeding (10mm in diameter, 1 case); in the TENS group: transient aggravation of back pain (1 case), transient fatigue (1 case), itching with electrode (1 case). Seven patients in each group did not experience any adverse events. | Increased back pain<br>Transient fatigue<br>Itching with electrode | Y           | Y                | Data extracted (symptom aggravation, skin reaction, fatigue)<br>TENS = 3 events / 10 participants<br>Electroacupuncture = 4 events / 9 participants |
| (Tucker et al., 2015)       | <sup>358</sup>   | There were no clinically significant adverse events related to TENS in either group. In table 2 of their report                                                                                                                                                                                                                                                                                                                                                                                                 | Reported no adverse events                                         | Y = 0 tally | N = 0 tally      |                                                                                                                                                     |
| (Tugay et al., 2007)        | <sup>359</sup>   | No adverse effects were observed, supporting the findings of the related literature.                                                                                                                                                                                                                                                                                                                                                                                                                            | Reported no adverse events                                         | Y = 0 tally | N = 0 TENS ONLY  |                                                                                                                                                     |
| (Tulgar et al., 1991a)      | <sup>360</sup>   | No statements present                                                                                                                                                                                                                                                                                                                                                                                                                                                                                           | No information to extract                                          | N           | N                |                                                                                                                                                     |
| (Tulgar et al., 1991b)      | <sup>361</sup>   | No statements present                                                                                                                                                                                                                                                                                                                                                                                                                                                                                           | No information to extract                                          | N           | N                |                                                                                                                                                     |
| (Unterrainer et al., 2010)  | <sup>362</sup>   | In conclusion, the use of TENS before skin incision and postoperative is noninvasive, safe, simple, and free of systemic side effects in postoperative pain treatment after major spinal surgery.                                                                                                                                                                                                                                                                                                               | Reported no adverse events                                         | Y = 0 tally | N = 0 TENS ONLY  |                                                                                                                                                     |
| (Unterrainer et al., 2012)  | <sup>363</sup>   | No statements present                                                                                                                                                                                                                                                                                                                                                                                                                                                                                           | No information to extract                                          | N           | N                |                                                                                                                                                     |
| (Upton et al., 2017)        | <sup>364</sup>   | No adverse effects reported during the study.                                                                                                                                                                                                                                                                                                                                                                                                                                                                   | Reported no adverse events                                         | Y = 0 tally | N = 0 tally      |                                                                                                                                                     |
| (Vaidya, 2018)              | <sup>365</sup>   | However, no negative effects were found with the use of TENS in any stage of pregnancy which supports the finding of our study [9]. No negative effects were reported for any of the patients.                                                                                                                                                                                                                                                                                                                  | Reported no adverse events                                         | Y = 0 tally | N = 0 tally      |                                                                                                                                                     |
| (Vaillancourt et al., 2019) | <sup>366</sup>   | No statements present                                                                                                                                                                                                                                                                                                                                                                                                                                                                                           | No information to extract                                          | N           | N                |                                                                                                                                                     |



| Reference                    | Reference number | Extracted Text                                                                                                                                                                                                                                                                                                                                                                                                                                                                                                                                                                          | AEs related to TENS        | Statement   | Extractable Data | Comment                                                                                                                                                                                                                                                                                                       |
|------------------------------|------------------|-----------------------------------------------------------------------------------------------------------------------------------------------------------------------------------------------------------------------------------------------------------------------------------------------------------------------------------------------------------------------------------------------------------------------------------------------------------------------------------------------------------------------------------------------------------------------------------------|----------------------------|-------------|------------------|---------------------------------------------------------------------------------------------------------------------------------------------------------------------------------------------------------------------------------------------------------------------------------------------------------------|
| (Valenza et al., 2016)       | <sup>367</sup>   | No adverse effects were reported by any participant after any of the interventions.                                                                                                                                                                                                                                                                                                                                                                                                                                                                                                     | Reported no adverse events | Y = 0 tally | N = 0 tally      |                                                                                                                                                                                                                                                                                                               |
| (van der Ploeg et al., 1996) | <sup>368</sup>   | No adverse side-effects occurred.                                                                                                                                                                                                                                                                                                                                                                                                                                                                                                                                                       | Reported no adverse events | Y = 0 tally | N = 0 tally      |                                                                                                                                                                                                                                                                                                               |
| (van der Spank et al., 2000) | <sup>369</sup>   | No statements present                                                                                                                                                                                                                                                                                                                                                                                                                                                                                                                                                                   | No information to extract  | N           | N                |                                                                                                                                                                                                                                                                                                               |
| (Vance et al., 2012)         | <sup>370</sup>   | No statements present                                                                                                                                                                                                                                                                                                                                                                                                                                                                                                                                                                   | No information to extract  | N           | N                |                                                                                                                                                                                                                                                                                                               |
| (Vitalii and Oleg, 2014)     | <sup>371</sup>   | No side effects of LF-TENS were seen. Mean gabapentin dose was 1036.36 mg in the study group and 1560 mg in the control group, thus the basic dose was increased by 136.36 mg of gabapentin in the study group and by 560 mg in the control group (P=0.004; Fig. 2). Three patients from the control group reported drowsiness and dizziness on the ninth day of treatment (doses of gabapentin increased to 2700, 2400 and 1800 mg) and one patient reported blurred vision (dose of gabapentin increased to 2700 mg). No side effects of gabapentin were reported in the study group. | Reported no adverse events | Y           | N                | No data extracted because AEs due to the higher doses of gabapentin in control group. Thus, data reflects TENS efficacy in reducing AEs associated with gabapentin<br><br>TENS + gabapentin = 0 events<br>Placebo TENS + gabapentin = 4 events (drowsiness + dizziness, blurred vision related to gabapentin) |
| (Vrouva et al., 2019)        | <sup>372</sup>   | No statements present                                                                                                                                                                                                                                                                                                                                                                                                                                                                                                                                                                   | No information to extract  | N           | N                |                                                                                                                                                                                                                                                                                                               |
| (Walker et al., 1991)        | <sup>373</sup>   | No statements present                                                                                                                                                                                                                                                                                                                                                                                                                                                                                                                                                                   | No information to extract  | N           | N                |                                                                                                                                                                                                                                                                                                               |
| (Wang et al., 2009)          | <sup>374</sup>   | No statements present                                                                                                                                                                                                                                                                                                                                                                                                                                                                                                                                                                   | No information to extract  | N           | N                |                                                                                                                                                                                                                                                                                                               |
| (Warfield et al., 1985)      | <sup>375</sup>   | There were no complications in either group as a result of TENS. We conclude that TENS is a safe, effective adjunctive therapy for post thoracotomy pain.                                                                                                                                                                                                                                                                                                                                                                                                                               | Reported no adverse events | Y = 0 tally | N = 0 tally      |                                                                                                                                                                                                                                                                                                               |
| (Warke et al., 2004)         | <sup>376</sup>   | No statements present                                                                                                                                                                                                                                                                                                                                                                                                                                                                                                                                                                   | No information to extract  | N           | N                |                                                                                                                                                                                                                                                                                                               |
| (Warke et al., 2006)         | <sup>377</sup>   | No statements present                                                                                                                                                                                                                                                                                                                                                                                                                                                                                                                                                                   | No information to extract  | N           | N                |                                                                                                                                                                                                                                                                                                               |
| (Yameen et al., 2011)        | <sup>378</sup>   | No statements present                                                                                                                                                                                                                                                                                                                                                                                                                                                                                                                                                                   | No information to extract  | N           |                  | Transcutaneous electrical nerve stimulation is an effective, easy to use and with minimal side effects in patients suffering from trigeminal neuralgia not responding to conventional therapy.                                                                                                                |
| (Yesil et al., 2018)         | <sup>379</sup>   | No adverse events due to electrotherapy such as irritation or burning of the skin were observed.                                                                                                                                                                                                                                                                                                                                                                                                                                                                                        | Reported no adverse events | Y = 0 tally | N = 0 TENS ONLY  |                                                                                                                                                                                                                                                                                                               |
| (Yilmaz et al., 2020)        | <sup>380</sup>   | We did not observe any side effects or intolerance associated with TENS in our patients. Also, TENS application did not cause any negative changes in vital signs. This result indicates that TENS is easily applied, and its efficacy and safety could help in pain relief for inguinal herniorrhaphy.                                                                                                                                                                                                                                                                                 | Reported no adverse events | Y = 0 tally | N = 0 TENS ONLY  |                                                                                                                                                                                                                                                                                                               |

| Reference                     | Reference number | Extracted Text                                                                       | AEs related to TENS         | Statement   | Extractable Data | Comment                                                                                                                     |
|-------------------------------|------------------|--------------------------------------------------------------------------------------|-----------------------------|-------------|------------------|-----------------------------------------------------------------------------------------------------------------------------|
| (Yilmazer et al., 2012)       | <sup>381</sup>   | No statements present                                                                | No information to extract   | N           | N                |                                                                                                                             |
| (Yokoyama et al., 2004)       | <sup>382</sup>   | No statements present                                                                | No information to extract   | N           | N                |                                                                                                                             |
| (Yoshimizu et al., 2012)      | <sup>383</sup>   | No adverse effects or carryover effect were detected.                                | Reported no adverse events  | Y = 0 tally | N = 0 tally      |                                                                                                                             |
| (Yüksel et al., 2019)         | <sup>384</sup>   | No statements present                                                                | No information to extract   | N           | N                |                                                                                                                             |
| (Yurtkuran and Kocagil, 1999) | <sup>385</sup>   | No statements present                                                                | No information to extract   | N           | N                |                                                                                                                             |
| (Zakariaee et al., 2019)      | <sup>386</sup>   | No statements present                                                                | No information to extract   | N           | N                | Mentions that adverse events will be documented but then fails to provide data or clear statement in results nor discussion |
| (Zhang et al., 2020)          | <sup>387</sup>   | No statements present                                                                | No information to extract   | N           | N                |                                                                                                                             |
| (Zhou et al., 2018)           | <sup>388</sup>   | No adverse events were observed in either of the groups during the 8-week follow-up. | Reported no adverse events. | Y = 0 tally | N = 0 tally      |                                                                                                                             |

### Legend

Information was identified by searching for text and/or numerical data that referred to adverse events. Information was ‘cut and pasted’ into this Table. Where available, data on the occurrence of adverse events in each intervention arm was tallied as events (irrespective of severity) per number participants exposed (i.e. number in intervention arm), pooled and meta-analysed. If trial reports included a statement that no adverse events were observed during the study this was identified as such in our table. We only extracted data as ‘zero’ when the RCT report included numerical data for the presence of at least one adverse event in one of the trial arms and clearly stated that no adverse events had occurred in the other trial arm(s), in line with advice from the Cochrane Collaboration. Y, yes; N, no; TENS, transcutaneous electrical nerve stimulation.

### REFERENCES\*

\*Note: Reference numbering in this list relates only to studies cited in this table

1. Abbasi AA, Shehzad M, Hussain A. Transcutaneous Electrical Nerve Encouragement by Way of the Adjunct to Non-Steroidal Unwilling-Inflammatory Medicines for Aching Management Throughout Pleurodesis. *Indo American Journal of Pharmaceutical Sciences* 2019; **6**(6): 12943-7.
2. Abelson K, Langely GB, Sheppard H. Transcutaneous electrical nerve stimulation in rheumatoid arthritis. *New Zealand Medical Journal* 1983; **96**(727): 156-8.
3. Abreu EA, Santos JDMd, Ventura PLJRD. Efetividade da eletroestimulação nervosa transcutânea no alívio da dor durante o trabalho de parto: um ensaio clínico controlado. 2010; **11**(4): 313-8.
4. Acedo AA, Ludovice Antunes AC, Barros dos Santos A, et al. Upper trapezius relaxation induced by TENS and interferential current in computer users with chronic nonspecific neck discomfort: An electromyographic analysis. *Journal of back and musculoskeletal rehabilitation* 2015; **28**(1): 19-24.
5. Adedoyin RA, Olaogun MOB, Oyeyemi AL. Transcutaneous electrical nerve stimulation and interferential current combined with exercise for the treatment of knee osteoarthritis: a randomised controlled trial. *Hong Kong Physiotherapy Journal* 2005; **23**: 13-9.

6. Ahmed MT. Effect of transcutaneous electrical nerve stimulation on postoperative pain after inguinal hernia repair: A randomized placebo-controlled trial. [Turkish]. *Turkiye Fiziksel Tip ve Rehabilitasyon Dergisi* 2010; **56**(4): 170-6.
7. Ahmed GM, Maher EA, Elnassag BAEMR, Sayed HM, Kabbash SI. Effects of repetitive transcranial magnetic stimulation versus transcutaneous electrical nerve stimulation to decrease diabetic neuropathic pain. *International Journal of Therapy and Rehabilitation* 2020; **27**(2).
8. Alcidi L, Beneforti E, Maresca M, Santosuosso U, Zoppi M. Low power radiofrequency electromagnetic radiation for the treatment of pain due to osteoarthritis of the knee. *Reumatismo* 2007; **59**(2): 140-5.
9. Ali J, Yaffe CS, Serrette C. The effect of transcutaneous electric nerve stimulation on postoperative pain and pulmonary function. *Surgery* 1981; **89**(4): 507-12.
10. Alizade MH, Ahmadizad S. A comparison of exercise therapy and transcutaneous electrical nerve stimulation for the treatment of chronic low back pain. *Word J Sport Sci* 2009; **2**(1): 43-7.
11. Allais G, De Lorenzo C, Quirico PE, et al. Non-pharmacological approaches to chronic headaches: Transcutaneous electrical nerve stimulation, lasertherapy and acupuncture in transformed migraine treatment. *Neurological Sciences* 2003; **24**(SUPPL. 2): S138-S42.
12. Alm WA, Gold ML, Weil LS. Evaluation of transcutaneous electrical nerve stimulation (TENS) in podiatric surgery. *Journal of the American Podiatry Association* 1979; **69**(9): 537-42.
13. Al-Smadi J, Warke K, Wilson I, et al. A pilot investigation of the hypoalgesic effects of transcutaneous electrical nerve stimulation upon low back pain in people with multiple sclerosis. *Clinical rehabilitation* 2003; **17**(7): 742-9.
14. Altay F, Durmus D, Cantürk F. Effects of TENS on pain, disability, quality of life and depression in patients with knee osteoarthritis. *Turkish Journal of Rheumatology* 2010; **25**(3): 116-21.
15. Alvarez-Arenal A, Junquera LM, Fernandez JP, Gonzalez I, Olay S. Effect of occlusal splint and transcutaneous electric nerve stimulation on the signs and symptoms of temporomandibular disorders in patients with bruxism. *Journal of oral rehabilitation* 2002; **29**(9): 858-63.
16. Alves Silverio KC, Brasolotto AG, Thais Donalson Siqueira L, Carneiro CG, Fukushiro AP, Roberto de Jesus Guirro R. Effect of application of transcutaneous electrical nerve stimulation and laryngeal manual therapy in dysphonic women: clinical trial. *Journal of voice : official journal of the Voice Foundation* 2015; **29**(2): 200-8.
17. Amer-Cuenca JJ, Goicoechea C, Girona-Lopez A, et al. Pain relief by applying transcutaneous electrical nerve stimulation (TENS) during unsedated colonoscopy: a randomized double-blind placebo-controlled trial. *European journal of pain (London, England)* 2011; **15**(1): 29-35.
18. AminiSaman J, Karimpour H, Hemmatpour B, Mohammadi S, Darvishi S, Kawyannejad R. Effect of TENS on the Pain Intensity during Insertion of Needle in Patients Undergoing Spinal anesthesia: A Randomized Controlled Study. *Journal of acupuncture and meridian studies* 2020.
19. Angulo DL, Colwell Jr CW. Use of postoperative TENS and continuous passive motion following total knee replacement. *Journal of Orthopaedic and Sports Physical Therapy* 1990; **11**(12): 599-604.
20. Ardic F, Sarhus M, Topuz O. Comparison of two different techniques of electrotherapy on myofascial pain. *Journal of back and musculoskeletal rehabilitation* 2002; **16**(1): 11-6.
21. Arvidsson I, Eriksson E. Postoperative TENS pain relief after knee surgery: objective evaluation. *Orthopedics* 1986; **9**(10): 1346-51.
22. Asgari Z, Tavoli Z, Hosseini R, et al. A Comparative Study between Transcutaneous Electrical Nerve Stimulation and Fentanyl to Relieve Shoulder Pain during Laparoscopic Gynecologic Surgery under Spinal Anesthesia: A Randomized Clinical Trail. *Pain research & management* 2018; **2018**: 9715142.
23. Atamaz FC, Durmaz B, Baydar M, et al. Comparison of the efficacy of transcutaneous electrical nerve stimulation, interferential currents, and shortwave diathermy in knee osteoarthritis: a double-blind, randomized, controlled, multicenter study. *Archives of physical medicine and rehabilitation* 2012; **93**(5): 748-56.
24. Aydin G, Tomruk S, Keles I, Demir SO, Orkun S. Transcutaneous electrical nerve stimulation versus baclofen in spasticity: Clinical and electrophysiologic comparison. *American Journal of Physical Medicine and Rehabilitation* 2005; **84**(8): 584-92.
25. Azatcam G, Atalay NS, Akkaya N, et al. Comparison of effectiveness of Transcutaneous Electrical Nerve Stimulation and Kinesio Taping added to exercises in patients with myofascial pain syndrome. *Journal of back and musculoskeletal rehabilitation* 2017; **30**(2): 291-8.

- 1  
2  
3 26. Báez-Suárez A, Martín-Castillo E, García-Andújar J, García-Hernández J, Quintana-Montesdeoca MP, Loro-Ferrer JF. Evaluation of different doses of  
4 transcutaneous nerve stimulation for pain relief during labour: a randomized controlled trial. *Trials* 2018; **19**(1): 652.
- 5 27. Bai HY, Bai HY, Yang ZQ. Effect of transcutaneous electrical nerve stimulation therapy for the treatment of primary dysmenorrhea. *Medicine* 2017; **96**(36): e7959.
- 6 28. Baki ED, Oz G, Kokulu S, et al. Comparison of Transcutaneous Electrical Nerve Stimulation and Paravertebral Block for Postthoracotomy Pain Relief. *The  
7 Thoracic and cardiovascular surgeon* 2015; **63**(6): 514-8.
- 8 29. Ballegaard S, Christophersen S, Dawids S, Hesse J, Olsen N. Acupuncture and transcutaneous electric nerve stimulation in the treatment of pain associated with  
9 chronic pancreatitis. A randomized study. *Scand J Gastroenterol* 1985; **20**(10): 1249-54.
- 10 30. Barbarisi M, Pace MC, Passavanti MB, et al. Pregabalin and transcutaneous electrical nerve stimulation for postherpetic neuralgia treatment. *The Clinical journal of  
11 pain* 2010; **26**(7): 567-72.
- 12 31. Barker R, Lang T, Steinlechner B, et al. Transcutaneous electrical nerve stimulation as prehospital emergency interventional care: Treating acute pelvic pain in  
13 young women. *Neuromodulation : journal of the International Neuromodulation Society* 2006; **9**(2): 136-42.
- 14 32. Barker KL, Elliott CJ, Sackley CM, Fairbank JC. Treatment of chronic back pain by sensory discrimination training. A Phase I RCT of a novel device (FairMed) vs.  
15 TENS. *BMC musculoskeletal disorders* 2008; **9**: 97.
- 16 33. Başkurt Z, Başkurt F, Özcan A, Yılmaz Ö. The immediate effects of heat and TENS on pressure pain threshold and pain intensity in patients with Stage I shoulder  
17 impingement syndrome. *The Pain Clinic* 2006; **18**(1): 81-5.
- 18 34. Bayindir O, Paker T, Akpınar B, Erenturk S, Askin D, Aytac A. Use of transcutaneous electrical nerve stimulation in the control of postoperative chest pain after  
19 cardiac surgery. *Journal of cardiothoracic and vascular anesthesia* 1991; **5**(6): 589-91.
- 20 35. Beckwée D, Bautmans I, Lefeber N, Lievens P, Scheerlinck T, Vaes P. Effect of Transcutaneous Electric Nerve Stimulation on Pain after Total Knee Arthroplasty: a  
21 Blind Randomized Controlled Trial. *Journal of knee surgery* 2018; **31**(2): 189-96.
- 22 36. Benedetti F, Amanzio M, Casadio C, et al. Control of postoperative pain by transcutaneous electrical nerve stimulation after thoracic operations. *The Annals of  
23 thoracic surgery* 1997; **63**(3): 773-6.
- 24 37. Bennett MI, Johnson MI, Brown SR, Radford H, Brown JM, Searle RD. Feasibility study of Transcutaneous Electrical Nerve Stimulation (TENS) for cancer bone  
25 pain. *The journal of pain : official journal of the American Pain Society* 2010; **11**(4): 351-9.
- 26 38. Bergeron-Vezina K, Filion C, Couture C, Vallee E, Laroche S, Leonard G. Adjusting Pulse Amplitude During Transcutaneous Electrical Nerve Stimulation Does  
27 Not Provide Greater Hypoalgesia. *Journal of alternative and complementary medicine (New York, NY)* 2018; **24**(3): 262-7.
- 28 39. Bertalanffy A, Kober A, Bertalanffy P, et al. Transcutaneous electrical nerve stimulation reduces acute low back pain during emergency transport. *Academic  
29 emergency medicine : official journal of the Society for Academic Emergency Medicine* 2005; **12**(7): 607-11.
- 30 40. Bi X, Lv H, Chen BL, Li X, Wang XQ. Effects of transcutaneous electrical nerve stimulation on pain in patients with spinal cord injury: a randomized controlled  
31 trial. *Journal of Physical Therapy Science* 2015; **27**(1): 23-5.
- 32 41. Bilgili A, Cakir T, Dogan SK, Ercalik T, Filiz MB, Toraman F. The effectiveness of transcutaneous electrical nerve stimulation in the management of patients with  
33 complex regional pain syndrome: A randomized, double-blinded, placebo-controlled prospective study. *Journal of back and musculoskeletal rehabilitation* 2016; **29**(4): 661-  
34 71.
- 35 42. Binder P, Gustafsson A, Uvnas-Moberg K, Nissen E. Hi-TENS combined with PCA-morphine as post caesarean pain relief. *Midwifery* 2011; **27**(4): 547-52.
- 36 43. Bjersa K, Andersson T. High frequency TENS as a complement for pain relief in postoperative transition from epidural to general analgesia after pancreatic  
37 resection. *Complementary therapies in clinical practice* 2014; **20**(1): 5-10.
- 38 44. Bjersa K, Jildenstaal P, Jakobsson J, Egardt M, Fagevik Olsen M. Adjunct High Frequency Transcutaneous Electric Stimulation (TENS) for Postoperative Pain  
39 Management during Weaning from Epidural Analgesia Following Colon Surgery: Results from a Controlled Pilot Study. *Pain management nursing : official journal of the  
40 American Society of Pain Management Nurses* 2015; **16**(6): 944-50.
- 41  
42  
43  
44  
45  
46

- 1  
2  
3 45. Bloodworth DM, Nguyen BN, Garver W, et al. Comparison of stochastic vs. conventional transcutaneous electrical stimulation for pain modulation in patients with  
4 electromyographically documented radiculopathy. *American journal of physical medicine & rehabilitation* 2004; **83**(8): 584-91.
- 5 46. Bolat MS, Cinar O, Asci R, Buyukalpelli R. A novel method for pain control: infiltration free local anesthesia technique (INFLATE) for transrectal prostatic biopsy  
6 using transcutaneous electrical nerve stimulation (TENS). *International urology and nephrology* 2019; **51**(12): 2119-26.
- 7 47. Bono F, Salvino D, Mazza MR, et al. The influence of ictal cutaneous allodynia on the response to occipital transcutaneous electrical stimulation in chronic migraine  
8 and chronic tension-type headache: a randomized, sham-controlled study. *Cephalalgia* 2015; **35**(5): 389-98.
- 9 48. Borjesson M, Eriksson P, Dellborg M, Eliasson T, Mannheimer C. Transcutaneous electrical nerve stimulation in unstable angina pectoris. *Coronary artery disease*  
10 1997; **8**(8-9): 543-50.
- 11 49. Borjesson M, Pilhall M, Eliasson T, Norrsell H, Mannheimer C, Rolny P. Esophageal visceral pain sensitivity: Effects of TENS and correlation with manometric  
12 findings. *Digestive Diseases and Sciences* 1998; **43**(8): 1621-8.
- 13 50. Borup L, Wurlitzer W, Hedegaard M, Kesmodel US, Hvidman L. Acupuncture as pain relief during delivery: a randomized controlled trial. *Birth (berkeley, calif)*  
14 2009; **36**(1): 5-12.
- 15 51. Breit R, Van der Wall H. Transcutaneous electrical nerve stimulation for postoperative pain relief after total knee arthroplasty. *The Journal of arthroplasty* 2004;  
16 **19**(1): 45-8.
- 17 52. Buchmuller A, Navez M, Milletre-Bernardin M, et al. Value of TENS for relief of chronic low back pain with or without radicular pain. *European journal of pain*  
18 *(London, England)* 2012; **16**(5): 656-65.
- 19 53. Bulut M, Özcan A, Çakan T, Mektas M, Çulha C. The Comparison of Effectiveness of TENS and Placebo TENS in Peripheral Neuropathic Pain in Patients with  
20 Type II Diabetes Mellitus. *Turkiye Klinikleri Journal of Medical Sciences* 2011; **31**(4): 913-8.
- 21 54. Bundsen P, Ericson K, Peterson L, Thiringer K. Pain relief in labor by transcutaneous electrical nerve stimulation. Testing of a modified stimulation technique and  
22 evaluation of the neurological and biochemical condition of the newborn infant. *Acta obstetrica et gynecologica Scandinavica* 1982; **61**(2): 129-36.
- 23 55. Can F, Tandogan R, Yilmaz I, Dolunay E, Erden Z. Rehabilitation of patellofemoral pain syndrome: TENS versus diadynamic current therapy for pain relief. *Pain*  
24 *Clinic* 2003; **15**(1): 61-8.
- 25 56. Casale R, Damiani C, Maestri R, Wells CD. Pain and electrophysiological parameters are improved by combined 830-1064 high-intensity LASER in symptomatic  
26 carpal tunnel syndrome versus Transcutaneous Electrical Nerve Stimulation. A randomized controlled study. *European journal of physical and rehabilitation medicine* 2013;  
27 **49**(2): 205-11.
- 28 57. Çebi AT. Effects of transcutaneous electrical nerve stimulation on pain after impacted third molar surgery. *Medicina Oral Patologia Oral y Cirugia Bucal* 2019;  
29 **24**(3): e404-e8.
- 30 58. Celik EC, Erhan B, Gunduz B, Lakse E. The effect of low-frequency TENS in the treatment of neuropathic pain in patients with spinal cord injury. *Spinal cord*  
31 2013; **51**(4): 334-7.
- 32 59. Cetin N, Aytar A, Atalay A, Akman M. Comparing hot pack, short-wave diathermy, ultrasound, and TENS on isokinetic strength, pain, and functional status of  
33 women with osteoarthritic knees: a single-blind, randomized, controlled trial. *American Journal of Physical Medicine and Rehabilitation* 2008; **87**(6): 443-51.
- 34 60. Chandra A, Banavaliker JN, Das PK, Hasti S. Use of transcutaneous electrical nerve stimulation as an adjunctive to epidural analgesia in the management of acute  
35 thoracotomy pain. *Indian J Anaesth* 2010; **54**(2): 116-20.
- 36 61. Cheing GL, Hui-Chan CW. Transcutaneous electrical nerve stimulation: nonparallel antinociceptive effects on chronic clinical pain and acute experimental pain.  
37 *Archives of physical medicine and rehabilitation* 1999; **80**(3): 305-12.
- 38 62. Cheing GL, Luk ML. Transcutaneous electrical nerve stimulation for neuropathic pain. *Journal of hand surgery (Edinburgh, Scotland)* 2005; **30**(1): 50-5.
- 39 63. Cheing GL, Hui-Chan CW, Chan KM. Does four weeks of TENS and/or isometric exercise produce cumulative reduction of osteoarthritic knee pain? *Clinical*  
40 *rehabilitation* 2002; **16**(7): 749-60.
- 41  
42  
43  
44  
45  
46



- 1  
2  
3 64. Cheing GL, Tsui AY, Lo SK, Hui-Chan CW. Optimal stimulation duration of tens in the management of osteoarthritic knee pain. *Journal of rehabilitation medicine* 2003; **35**(2): 62-8.
- 4 65. Chellappa D, Thirupathy M. Comparative efficacy of low-Level laser and TENS in the symptomatic relief of temporomandibular joint disorders: a randomized clinical trial. *Indian journal of dental research* 2020; **31**(1): 42-7.
- 5 66. Cherian JJ, Harrison PE, Benjamin SA, Bhave A, Harwin SF, Mont MA. Do the Effects of Transcutaneous Electrical Nerve Stimulation on Knee Osteoarthritis Pain and Function Last? *The journal of knee surgery* 2016; **29**(6): 497-501.
- 6 67. Cherian JJ, Kapadia BH, McElroy MJ, et al. Knee Osteoarthritis: Does Transcutaneous Electrical Nerve Stimulation Work? *Orthopedics* 2016; **39**(1): e180-6.
- 7 68. Chesterton LS, Lewis AM, Sim J, et al. Transcutaneous electrical nerve stimulation as adjunct to primary care management for tennis elbow: pragmatic randomised controlled trial (TATE trial). *BMJ (Clinical research ed)* 2013; **347**: f5160.
- 8 69. Lewis M, Chesterton LS, Sim J, Mallen CD, Hay EM, van der Windt DA. An Economic Evaluation of TENS in Addition to Usual Primary Care Management for the Treatment of Tennis Elbow: Results from the TATE Randomized Controlled Trial. *PloS one* 2015; **10**(8): e0135460.
- 9 70. Chia Y, Arulkumaran S, Chua S, Ratnam S. Effectiveness of transcutaneous electric nerve stimulator for pain relief in labour. *Asia Oceania J Obstet Gynaecol* 1990; **16**(2): 145-51.
- 10 71. Chiou YF, Yeh ML, Wang YJ. Transcutaneous Electrical Nerve Stimulation on Acupuncture Points Improves Myofascial Pain, Moods, and Sleep Quality. *Rehabil Nurs* 2019.
- 11 72. Chitsaz A, Janghorbani M, Shaygannejad V, Ashtari F, Heshmatipour M, Freeman J. Sensory complaints of the upper extremities in multiple sclerosis: relative efficacy of nortriptyline and transcutaneous electrical nerve stimulation. *The Clinical journal of pain* 2009; **25**(4): 281-5.
- 12 73. Chiu TT, Hui-Chan CW, Chein G. A randomized clinical trial of TENS and exercise for patients with chronic neck pain. *Clinical rehabilitation* 2005; **19**(8): 850-60.
- 13 74. Cipriano G, Jr., de Camargo Carvalho AC, Bernardelli GF, Tayar Peres PA. Short-term transcutaneous electrical nerve stimulation after cardiac surgery: effect on pain, pulmonary function and electrical muscle activity. *Interactive cardiovascular and thoracic surgery* 2008; **7**(4): 539-43.
- 14 75. Cipriano G, Jr., Neder JA, Umpierre D, et al. Sympathetic ganglion transcutaneous electrical nerve stimulation after coronary artery bypass graft surgery improves femoral blood flow and exercise tolerance. *Journal of applied physiology (Bethesda, Md : 1985)* 2014; **117**(6): 633-8.
- 15 76. Coelho de Amorim JS, Braz Rossetti Mr, Mendes Braga NIH. Effects of manual therapy and electrotherapy on knee osteoarthritis. *ConScientiae Saude* 2014; **13**(1): 11-20.
- 16 77. Cooperman AM, Hall B, Mikalacki K, Hardy R, Sardar E. Use of transcutaneous electrical stimulation in the control of postoperative pain. *American journal of surgery* 1977; **133**(2): 185-7.
- 17 78. Coyne PJ, MacMurren M, Izzo T, Kramer T. Transcutaneous electrical nerve stimulator for procedural pain associated with intravenous needlesticks. *Journal of intravenous nursing* 1995; **18**(5): 263-7.
- 18 79. Crompton AC, Johnson N, Dudek U, Batra N, Tucker A. Is transcutaneous electrical nerve stimulation of any value during cervical laser treatment? *British journal of obstetrics and gynaecology* 1992; **99**(6): 492-4.
- 19 80. Cuschieri RJ, Morran CG, McArdle CS. Transcutaneous electrical stimulation for postoperative pain. *Annals of the Royal College of Surgeons of England* 1985; **67**(2): 127-9.
- 20 81. Cuschieri RJ, Morran CG, Pollock JG. Transcutaneous electrical stimulation for ischaemic pain at rest. *British medical journal (Clinical research ed)* 1987; **295**(6593): 306.
- 21 82. da Silva TFG, Suda EY, Marçulo CA, Paes FHS, Pinheiro GT. Comparison of transcutaneous electrical nerve stimulation and hydrotherapy effects on pain, flexibility and quality of life in patients with fibromyalgia. *Fisioterapia e Pesquisa* 2008; **15**(2): 118-24 7p.
- 22 83. da Silva MP, Liebano RE, Rodrigues VA, Abla LE, Ferreira LM. Transcutaneous electrical nerve stimulation for pain relief after liposuction: a randomized controlled trial. *Aesthetic plastic surgery* 2015; **39**(2): 262-9.
- 23  
24  
25  
26  
27  
28  
29  
30  
31  
32  
33  
34  
35  
36  
37  
38  
39  
40  
41  
42  
43  
44  
45  
46



- 1  
2  
3 84. Dailey DL, Rakel BA, Vance CG, et al. Transcutaneous electrical nerve stimulation reduces pain, fatigue and hyperalgesia while restoring central inhibition in  
4 primary fibromyalgia. *Pain* 2013; **154**(11): 2554-62.
- 5 85. Dailey DL, Vance CGT, Rakel BA, et al. Transcutaneous Electrical Nerve Stimulation Reduces Movement-Evoked Pain and Fatigue: A Randomized, Controlled  
6 Trial. *Arthritis & Rheumatology* 2020; **72**(5): 824-36.
- 7 86. Davies JR. Ineffective transcutaneous nerve stimulation following epidural anaesthesia. *Anaesthesia* 1982 Apr; **37**(4):453-457 1982.
- 8 87. Dawood MY, Ramos J. Transcutaneous electrical nerve stimulation (TENS) for the treatment of primary dysmenorrhea: a randomized crossover comparison with  
9 placebo TENS and ibuprofen. *Obstetrics and gynecology* 1990; **75**(4): 656-60.
- 10 88. De Angelis C, Perrone G, Santoro G, Nofroni I, Zichella L. Suppression of pelvic pain during hysteroscopy with a transcutaneous electrical nerve stimulation device.  
11 *Fertility and sterility* 2003; **79**(6): 1422-7.
- 12 89. De Giorgi I, Castorflorio T, Sartoris B, Deregibus A. The use of conventional transcutaneous electrical nerve stimulation in chronic facial myalgia patients. *Clinical*  
13 *oral investigations* 2017; **21**(1): 275-80.
- 14 90. de Oliveira RGCQ, Silva, J.C., de Almeida, J.F., de Araajo, R.C., Pitangui, A.C.R. High and low frequency TENS for primary dysmenorrhea: preliminary study.  
15 *ConScientiae Saude* 2012; **11**(1): 149-58.
- 16 91. de Orange FA, Amorim MMRd, Lima L. Uso da eletroestimulação transcutânea para alívio da dor durante o trabalho de parto em uma maternidade-escola: ensaio  
17 clínico controlado %J Revista Brasileira de Ginecologia e Obstetrícia. 2003; **25**: 45-52.
- 18 92. de Sousa L, Gomes-Sponholz FA, Nakano AM. Transcutaneous electrical nerve stimulation for the relief of post-partum uterine contraction pain during breast-  
19 feeding: a randomized clinical trial. *The journal of obstetrics and gynaecology research* 2014; **40**(5): 1317-23.
- 20 93. DeSantana JM, Santana-Filho VJ, Guerra DR, Sluka KA, Gurgel RQ, da Silva Jr WM. Hypoalgesic Effect of the Transcutaneous Electrical Nerve Stimulation  
21 Following Inguinal Herniorrhaphy: A Randomized, Controlled Trial. *Journal of Pain* 2008; **9**(7): 623-9.
- 22 94. DeSantana J, Sluka K, Rocha LG. High and low frequency TENS reduce postoperative pain intensity after laparoscopic tubal ligation: A randomized controlled trial.  
23 *Clinical Journal of Pain* 2009; **25**(2): 12-28.
- 24 95. Dewan A, Sharma R. Effectiveness of transcutaneous electrical nerve stimulation and interferential electrotherapy in adhesive capsulitis. *Pb Journal of Orthopaedics*  
25 2011; **21**(1): 64.
- 26 96. Deyo RA, Walsh NE, Martin DC, Schoenfeld LS, Ramamurthy S. A controlled trial of transcutaneous electrical nerve stimulation (TENS) and exercise for chronic  
27 low back pain. *The New England journal of medicine* 1990; **322**(23): 1627-34.
- 28 97. Dibenedetto P, Iona LG, Zidarich V. CLINICAL-EVALUATION OF S-ADENOSYL-L-METHIONINE VERSUS TRANSCUTANEOUS ELECTRICAL NERVE-  
29 STIMULATION IN PRIMARY FIBROMYALGIA. *Current Therapeutic Research-Clinical and Experimental* 1993; **53**(2): 222-9.
- 30 98. Dilekci E, Alpayci M, Bayram KB, et al. The efficacy of TENS in patients with lateral epicondylitis: A randomized controlled study. [Turkish]. *Turkiye Fiziksel Tip*  
31 *ve Rehabilitasyon Dergisi* 2016; **62**(4): 297-302.
- 32 99. Dissanayaka TD, Pallegama RW, Suraweera HJ, Johnson MI, Kariyawasam AP. Comparison of the Effectiveness of Transcutaneous Electrical Nerve Stimulation  
33 and Interferential Therapy on the Upper Trapezius in Myofascial Pain Syndrome: A Randomized Controlled Study. *American journal of physical medicine & rehabilitation*  
34 2016; **95**(9): 663-72.
- 35 100. Dogu B, Yilmaz F, Karan A, Ergoz E, Kuran B. Comparative the effectiveness of occlusal splint and TENS treatments on clinical findings and pain threshold of  
36 temporomandibular disorders secondary to bruxism. [Turkish]. *Turkiye Fiziksel Tip ve Rehabilitasyon Dergisi* 2008; **54**(4): 1-7.
- 37 101. Domaille M, Reeves B. TENS and pain control after coronary artery bypass surgery. *Physiotherapy* 1997; **83**(10): 510-6.
- 38 102. Ebadi S, Ansari N, Ahadi T, Fallah E, Forogh B. No immediate analgesic effect of diadynamic current in patients with nonspecific low back pain in comparison to  
39 TENS. *Journal of Bodywork and Movement Therapies* 2018; **22**(3): 693-9.
- 40 103. Ekblom A, Hansson P. Thermal sensitivity is not changed by acute pain or afferent stimulation. *Journal of neurology, neurosurgery, and psychiatry* 1987; **50**(9):  
41 1216-20.
- 42  
43  
44  
45  
46

- 1  
2  
3 104. Ekim A, Armagan O, Oner C. [Efficiency of TENS treatment in hemiplegic shoulder pain: a placebo controlled study]. *Agri : Agri (Algoloji) Derneği'nin Yayın*  
4 *organidir = The journal of the Turkish Society of Algology* 2008; **20**(1): 41-6.
- 5 105. Elboim-Gabyzon M, Andrawus Najjar S, Shtarker H. Effects of transcutaneous electrical nerve stimulation (TENS) on acute postoperative pain intensity and  
6 mobility after hip fracture: a double-blinded, randomized trial. *Clinical interventions in aging* 2019; **14**: 1841-50.
- 7 106. Elserty N, Kattabei O, Elhafez H. Effect of Fixed Versus Adjusted Transcutaneous Electrical Nerve Stimulation Amplitude on Chronic Mechanical Low Back Pain.  
8 *Journal of alternative and complementary medicine (New York, NY)* 2016; **22**(7): 557-62.
- 9 107. Emmiler M, Solak O, Kocogullari C, et al. Control of acute postoperative pain by transcutaneous electrical nerve stimulation after open cardiac operations: a  
10 randomized placebo-controlled prospective study. *The heart surgery forum* 2008; **11**(5): E300-3.
- 11 108. Engen DJ, Carns PE, Allen MS, et al. Evaluating efficacy and feasibility of transcutaneous electrical nerve stimulation for postoperative pain after video-assisted  
12 thoroscopic surgery: A randomized pilot trial. *Complementary therapies in clinical practice* 2016; **23**: 141-8.
- 13 109. Erden S, Senol Celik S. The effect of transcutaneous electrical nerve stimulation on post-thoracotomy pain. *Contemporary nurse* 2015; **51**(2-3): 163-70.
- 14 110. Erdogan M, Erdogan A, Erbil N, Karakaya H, Demircan A. Prospective, randomized, placebo-controlled study of the effect of TENS on postthoracotomy pain and  
15 pulmonary function. *World journal of surgery* 2005; **29**(12): 1563-70.
- 16 111. Erkkola R, Pikkola P, Kanto J. Transcutaneous nerve stimulation for pain relief during labour: a controlled study. *Annales chirurgiae ET gynaecologiae* 1980; **69**(6):  
17 273-7.
- 18 112. Escortell-Mayor E, Riesgo-Fuertes R, Garrido-Elustondo S, et al. Primary care randomized clinical trial: manual therapy effectiveness in comparison with TENS in  
19 patients with neck pain. *Manual therapy* 2011; **16**(1): 66-73.
- 20 113. Escortell Mayor E, Lebrijo Perez G, Perez Martin Y, Asunsolo del Barco A, Riesgo Fuertes R, Saa Requejo C. [Randomized clinical trial for primary care patients  
21 with neck pain: manual therapy versus electrical stimulation]. *Atencion primaria* 2008; **40**(7): 337-43.
- 22 114. Esteban Gonzalez P, Novoa NM, Varela G. Transcutaneous Electrical Nerve Stimulation Reduces Post-Thoracotomy Ipsilateral Shoulder Pain. A Prospective  
23 Randomized Study. *Archivos de bronconeumologia* 2015; **51**(12): 621-6.
- 24 115. Eyigor S, Karapolat H, Ibisoglu U, Durmaz B. Does transcutaneous electrical nerve stimulation or therapeutic ultrasound increase the effectiveness of exercise for  
25 knee osteoarthritis: A randomized controlled study. [Turkish]. *Agri : Agri (Algoloji) Derneği'nin Yayın organidir = The journal of the Turkish Society of Algology* 2008;  
26 **20**(1): 32-40.
- 27 116. Eyigor C, Eyigor S, Kivilcim Korkmaz O. Are intra-articular corticosteroid injections better than conventional TENS in treatment of rotator cuff tendinitis in the  
28 short run? A randomized study. *European journal of physical and rehabilitation medicine* 2010; **46**(3): 315-24.
- 29 117. Facci LM, Nowotny JP, Tormem F, Trevisani VF. Effects of transcutaneous electrical nerve stimulation (TENS) and interferential currents (IFC) in patients with  
30 nonspecific chronic low back pain: randomized clinical trial. *Sao Paulo medical journal = Revista paulista de medicina* 2011; **129**(4): 206-16.
- 31 118. Farahani DM, Tavallaie SA, Ahmadi K, Ashtiani AF. Comparison of Neurofeedback and Transcutaneous Electrical Nerve Stimulation Efficacy on Treatment of  
32 Primary Headaches: A Randomized Controlled Clinical Trial. *Iranian Red Crescent Medical Journal* 2014; **16**(8).
- 33 119. Farina S, Casarotto M, Benelle M, et al. A randomized controlled study on the effect of two different treatments (FREMS AND TENS) in myofascial pain  
34 syndrome. *Europa medicophysica* 2004; **40**(4): 293-301.
- 35 120. Fatima N, Sarfraz N. Comparison of High Versus Low Transcutaneous Electrical Nerve Stimulation for Pain Management After Caesarean Section: A Clinical Trial.  
36 *Annals of King Edward Medical University Lahore Pakistan* 2019; **25**(2).
- 37 121. Ferraz FS, Moreira CMC. Eletroanalgesia com utilizacao da TENS no pos-operatorio de cirurgia cardiaca (Electroanalgesia with TENS in postoperative of cardiac  
38 surgery) [Portuguese]. *Fisioterapia em Movimento [Physical Therapy in Movement]* 2009 Jan-Mar; **22**(1):133-139 2009.
- 39 122. Ferreira FC, Issy AM, Sakata RK. Assessing the effects of transcutaneous electrical nerve stimulation (TENS) in post-thoracotomy analgesia. *Revista brasileira de*  
40 *anestesiologia* 2011; **61**(5): 561-7, 308-10.
- 41  
42  
43  
44  
45  
46

- 1  
2  
3 123. Ferreira AP, Costa DR, Oliveira AI, et al. Short-term transcutaneous electrical nerve stimulation reduces pain and improves the masticatory muscle activity in  
4 temporomandibular disorder patients: a randomized controlled trial. *Journal of applied oral science : revista FOB* 2017; **25**(2): 112-20.
- 5 124. Finsen V, Persen L, Lovlien M, et al. Transcutaneous electrical nerve stimulation after major amputation. *The Journal of bone and joint surgery British volume*  
6 1988; **70**(1): 109-12.
- 7 125. Fiorelli A, Morgillo F, Milione R, et al. Control of post-thoracotomy pain by transcutaneous electrical nerve stimulation: effect on serum cytokine levels, visual  
8 analogue scale, pulmonary function and medication. *European journal of cardio-thoracic surgery : official journal of the European Association for Cardio-thoracic Surgery*  
9 2012; **41**(4): 861-8; discussion 8.
- 10 126. Fodor-Sertl B, Miller K, Hohenfellner B. (Transcutaneous electric nerve block in postoperative pain-therapy) [German]. *Zeitschrift fuer Physikalische Medizin,*  
11 *Balneologie, Medizinische Klimatologie* 1990; **19**: 132-7.
- 12 127. Forogh B, Aslanpour H, Fallah E, Babaei-Ghazani A, Ebadi S. Adding high-frequency transcutaneous electrical nerve stimulation to the first phase of post anterior  
13 cruciate ligament reconstruction rehabilitation does not improve pain and function in young male athletes more than exercise alone: a randomized single-blind clinical trial.  
14 *Disability and rehabilitation* 2019; **41**(5): 514-22.
- 15 128. Forst T, Nguyen M, Forst S, Disselhoff B, Pohlmann T, Pftzner A. Impact of low frequency transcutaneous electrical nerve stimulation on symptomatic diabetic  
16 neuropathy using the new Salutaris (R) device. *Diabetes Nutrition & Metabolism* 2004; **17**(3): 163-8.
- 17 129. Forster EL, Kramer JF, Lucy SD, Scudds RA, Novick RJ. Effect of TENS on pain, medications, and pulmonary function following coronary artery bypass graft  
18 surgery. *Chest* 1994; **106**(5): 1343-8.
- 19 130. Fujii-Abe K, Umino M, Kawahara H, Terada C, Satomura K, Fukayama H. New method for postoperative pain relief using a combination of noxious and non-  
20 noxious stimuli after impacted wisdom tooth extraction. *Journal of oral science* 2019; **61**(2): 364-9.
- 21 131. Galli TT, Chiavegato LD, Liebano RE. Effects of TENS in living kidney donors submitted to open nephrectomy: a randomized placebo-controlled trial. *European*  
22 *journal of pain (London, England)* 2015; **19**(1): 67-76.
- 23 132. Galloway DJ, Boyle P, Burns HJ, Davidson PM, George WD. A clinical assessment of electroanalgesia following abdominal operations. *Surgery, gynecology &*  
24 *obstetrics* 1984; **159**(5): 453-6.
- 25 133. Garcia-Perez S, Garcia-Rios MC, Perez-Marmol JM, et al. Effectiveness of Transcutaneous Electrical Nerve Stimulation Energy in Older Adults: A Pilot Clinical  
26 Trial. *Advances in skin & wound care* 2018; **31**(10): 462-9.
- 27 134. Gerson GR, Jones RB, Luscombe DK. Studies on the concomitant use of carbamazepine and clomipramine for the relief of post-herpetic neuralgia. *Postgraduate*  
28 *medical journal* 1977; **53 Suppl 4**: 104-9.
- 29 135. Ghoname ESA, Craig WF, White PF, et al. Percutaneous electrical nerve stimulation for low back pain - A randomized crossover study. *Jama-Journal of the*  
30 *American Medical Association* 1999; **281**(9): 818-23.
- 31 136. Ghoname ESA, White PF, Ahmed HE, Hamza MA, Craig WF, Noe CE. Percutaneous electrical nerve stimulation: an alternative to TENS in the management of  
32 sciatica. *Pain* 1999; **83**(2): 193-9.
- 33 137. Gilbert JM, Gledhill T, Law N, George C. Controlled trial of transcutaneous electrical nerve stimulation (TENS) for postoperative pain relief following inguinal  
34 herniorrhaphy. *The British journal of surgery* 1986; **73**(9): 749-51.
- 35 138. Grabiańska E, Leśniewicz J, Pieszyński I, Kostka J. Comparison of the analgesic effect of interferential current (IFC) and TENS in patients with low back pain.  
36 *Wiadomości lekarskie (Warsaw, Poland)* 2015; **68**(1): 13-9.
- 37 139. Graff-Radford S, Reeves J, Baker R, Chiu D. Effects of transcutaneous electrical nerve stimulation on myofascial pain and trigger point sensitivity. *Pain* 1989;  
38 **37**(1): 1-5.
- 39 140. Grant DJ, Bishop\_Miller J, Winchester DM, Anderson M, Faulkner S. A randomized comparative trial of acupuncture versus transcutaneous electrical nerve  
40 stimulation for chronic back pain in the elderly. *Pain* 1999; **82**(1): 9-13.
- 41  
42  
43  
44  
45  
46

- 1  
2  
3 141. Gregorini C, Cipriano Jr G, De Aquino LM, Rodrigues Branco JN, Bernardelli GF. Short-duration transcutaneous electrical nerve stimulation in the postoperative  
4 period of cardiac surgery. [Portuguese, English]. *Arquivos brasileiros de cardiologia* 2010; **94**(3): 325-31+45-51.
- 5 142. Grimmer K. A controlled double blind study comparing the effects of strong burst mode TENS and High Rate TENS on painful osteoarthritic knees. *Australian  
6 Journal of Physiotherapy* 1992; **38**: 49-56.
- 7 143. Gschiel B, Kager H, Pipam W, Weichart K, Likar R. Analgesic efficacy of TENS therapy in patients with gonarthrosis. A prospective, randomised, placebo-  
8 controlled, double-blind study. [German]. *Schmerz (Berlin, Germany)* 2010; **24**(5): 494-500.
- 9 144. Gunay Ucurum S, Kaya DO, Kayali Y, Askin A, Tekindal MA. Comparison of different electrotherapy methods and exercise therapy in shoulder impingement  
10 syndrome: a prospective randomized controlled trial. *Acta orthopaedica et traumatologica turcica* 2018; **52**(4): 249-55.
- 11 145. Guo XJ, Jia J. Comparison of therapeutic effects on fibromyalgia syndrome between dermal-neurological electric stimulation and electric acupuncture. *Chinese  
12 Journal of Clinical Rehabilitation* 2005; **9**(46): 171-3.
- 13 146. Hamza MA, White PF, Ahmed HE, Ghoname EA. Effect of the frequency of transcutaneous electrical nerve stimulation on the postoperative opioid analgesic  
14 requirement and recovery profile. *Anesthesiology* 1999; **91**(5): 1232-8.
- 15 147. Hanfy HM, El-Bigawy A. Effects of transcutaneous electrical nerve stimulation versus acupressure in the treatment of primary dysmenorrhea. *Bull Fac Phys Ther  
16 Cairo Univ* 2004; **9**: 2.
- 17 148. Hansson P, Eklblom A. Transcutaneous electrical nerve stimulation (TENS) as compared to placebo TENS for the relief of acute oro-facial pain. *Pain* 1983; **15**(2):  
18 157-65.
- 19 149. Hansson P, Eklblom A, Thomsson M, Fjellner B. Influence of naloxone on relief of acute oro-facial pain by transcutaneous electrical nerve stimulation (TENS) or  
20 vibration. *Pain* 1986; **24**(3): 323-9.
- 21 150. Hargreaves A, Lander J. Use of transcutaneous electrical nerve stimulation for postoperative pain. *Nursing research* 1989; **38**(3): 159-61.
- 22 151. Harrison RF, Woods T, Shore M, Mathews G, Unwin A. Pain relief in labour using transcutaneous electrical nerve stimulation (TENS). A TENS/TENS placebo  
23 controlled study in two parity groups. *British journal of obstetrics and gynaecology* 1986; **93**(7): 739-46.
- 24 152. Hart JM, Kuenze CM, Pietrosimone BG, Ingersoll CD. Quadriceps function in anterior cruciate ligament-deficient knees exercising with transcutaneous electrical  
25 nerve stimulation and cryotherapy: a randomized controlled study. *Clinical rehabilitation* 2012; **26**(11): 974-81.
- 26 153. Hazneci B, Tan AK, Ozdem T, Dincer K, Kalyon TA. The effects of transcutaneous electroneurostimulation and ultrasound in the treatment of reflex sympathetic  
27 dystrophy syndrome. [Turkish]. *Turkiye Fiziksel Tip ve Rehabilitasyon Dergisi* 2005; **51**(3): 83-9.
- 28 154. Herrera-Lasso I, Mobarak L, Fernández-Dominguez L, Cardiel MH, Alarcón-Segovia D. Comparative Effectiveness of Packages of Treatment Including Ultrasound  
29 or Transcutaneous Electrical Nerve Stimulation in Painful Shoulder Syndrome. *Physiotherapy* 1993; **79**(4): 251-3.
- 30 155. Hershman M CW, Swift R, Reilly D, Gompertz H, Wood C. Transcutaneous electrical nerve stimulation as adjunctive analgesia in patients undergoing abdominal  
31 procedures. *Surg Res Commun* 1989; **7**: 65-9.
- 32 156. Hou CR, Tsai LC, Cheng KF, Chung KC, Hong C. Immediate effects of various physical therapeutic modalities on cervical myofascial pain and trigger-point  
33 sensitivity. *Archives of physical medicine and rehabilitation* 2002; **83**(10): 1406-14.
- 34 157. Hokenek NM, Erdogan MO, Hokenek UD, Algin A, Tekyol D, Seyhan AU. Treatment of migraine attacks by transcutaneous electrical nerve stimulation in  
35 emergency department: A randomize controlled trial. *American Journal of Emergency Medicine* 2020.
- 36 158. Hruby G, Ames C, Chen C, et al. Assessment of efficacy of transcutaneous electrical nerve stimulation for pain management during office-based flexible  
37 cystoscopy. *Urology* 2006; **67**(5): 914-7.
- 38 159. Hsieh CYJ, Phillips RB, Adams AH, Pope MH. First prize: Functional outcomes of low back pain: Comparison of four treatment groups in a randomized controlled  
39 trial. *Journal of manipulative and physiological therapeutics* 1992; **15**(1): 4-9.
- 40 160. Hsueh TC, Cheng PT, Kuan TS, Hong CZ. The immediate effectiveness of electrical nerve stimulation and electrical muscle stimulation on myofascial trigger  
41 points. *American journal of physical medicine & rehabilitation* 1997; **76**(6): 471-6.
- 42  
43  
44  
45  
46



- 1  
2  
3 161. Hughes S, Dailey P, Partridge C. Transcutaneous electrical nerve stimulation for labour analgesia. *Anesthesia and analgesia* 1988; **67**: S99.
- 4 162. Husch HH, Watte G, Zanon M, et al. Effects of Transcutaneous Electrical Nerve Stimulation on Pain, Pulmonary Function, and Respiratory Muscle Strength After  
5 Posterolateral Thoracotomy: A Randomized Controlled Trial. *Lung* 2020; **198**(2): 345-53.
- 6 163. Ilhanli I. Conventional, Acupuncture-Like or Brief-Intense: Is There Any Difference Between TENS Modalities According to Outcomes of Chronic Low Back Pain  
7 with Lumbar Disc Herniation. *Clinical Medicine Research* 2015; **4**(5): 143-50.
- 8 164. Inal EE, Eroglu P, Yucel SH, Orhan H. Which is the Appropriate Frequency of TENS in Managing Knee Osteoarthritis: High or Low Frequency? *Journal of*  
9 *Clinical and Analytical Medicine* 2016; **7**(3): 339-44.
- 10 165. Isik M, Ugur M, Yakisan RS, Sari T, Yilmaz N. Comparison of the effectiveness of medicinal leech and TENS therapy in the treatment of primary osteoarthritis of  
11 the knee : A randomized controlled trial. *Zeitschrift fur Rheumatologie* 2017; **76**(9): 798-805.
- 12 166. Jaafarpour M, Khani A, Javadifar N, Taghinejad H, Mahmoudi R, Saadipour KH. The analgesic effect of transcutaneous electrical nerve stimulation (TENS) on  
13 caesarean under spinal anaesthesia. *Journal of Clinical and Diagnostic Research* 2008; **2**(3): 815-9.
- 14 167. Jamison RN, Wan L, Edwards RR, Mei A, Ross EL. Outcome of a High-Frequency Transcutaneous Electrical Nerve Stimulator (hfTENS) Device for Low Back  
15 Pain: A Randomized Controlled Trial. *Pain Practice* 2019; **19**(5): 466-75.
- 16 168. Jarzem P, Harvey E, Arcaro N, Kaczorowski J. Transcutaneous electrical nerve stimulation (TENS) for short-term treatment of low back pain - randomized double  
17 blind crossover study of sham versus conventional TENS. *Journal of Musculoskeletal Pain* 2005; **13**(2): 11-7.
- 18 169. Jensen JE, Conn RR, Hazelrigg G, Hewett JE. The use of transcutaneous neural stimulation and isokinetic testing in arthroscopic knee surgery. *American journal of*  
19 *sports medicine* 1985; **13**(1): 27-33.
- 20 170. Jensen H, Zesler R, Christensen T. Transcutaneous electrical nerve stimulation (TNS) for painful osteoarthritis of the knee. *International journal of rehabilitation*  
21 *research Internationale Zeitschrift fur Rehabilitationsforschung Revue internationale de recherches de readaptation* 1991; **14**(4): 356-8.
- 22 171. Jones AYM, Hutchinson RC. A comparison of the analgesic effect of transcutaneous electrical nerve stimulation and entonox. *Physiotherapy* 1991; **77**(8): 526-30.
- 23 172. Kara B, Baskurt F, Acar S, et al. The effect of TENS on pain, function, depression, and analgesic consumption in the early postoperative period with spinal surgery  
24 patients. *Turkish neurosurgery* 2011; **21**(4): 618-24.
- 25 173. Karamaz A, Kaya S, Karaman H, Turhanoglu S. Effect of the frequency of transcutaneous electrical nerve stimulation on analgesia during extracorporeal shock  
26 wave lithotripsy. *Urological research* 2004; **32**(6): 411-5.
- 27 174. Kayman-Kose S, Ario DT, Toktas H, et al. Transcutaneous electrical nerve stimulation (TENS) for pain control after vaginal delivery and cesarean section. *The*  
28 *journal of maternal-fetal & neonatal medicine : the official journal of the European Association of Perinatal Medicine, the Federation of Asia and Oceania Perinatal*  
*Societies, the International Society of Perinatal Obstet* 2014; **27**(15): 1572-5.
- 29 175. Keskin EA, Onur O, Keskin HL, Gumus, II, Kafali H, Turhan N. Transcutaneous electrical nerve stimulation improves low back pain during pregnancy.  
30 *Gynecologic and obstetric investigation* 2012; **74**(1): 76-83.
- 31 176. Kibar S, Konak HE, V SA, DoĖAnay ErdoĖAn B, EvcİK D. The Effectiveness of Combined Transcutaneous Electrical Nerve Stimulation and Interferential  
32 Current Therapy on Chronic Low Back Pain: A Randomized, Double-Blind, Sham-Controlled Study. *Journal of Physical Medicine & Rehabilitation Sciences / Fiziksel Tıp*  
33 *ve Rehabilitasyon Bilimleri Dergisi* 2020; **23**(1): 32-40.
- 34 177. Kim S, Park K, Son B, Jeon Y. The Effect of Transcutaneous Electrical Nerve Stimulation on Pain During Venous Cannulation. *Current Therapeutic Research*  
35 2012; **73**(4/5): 134-9.
- 36 178. Kim D-H, Yoon KB, Yoon DM, et al. Comparison of NSAID Patch Given as Monotherapy and NSAID Patch in Combination with Transcutaneous Electric Nerve  
37 Stimulation, a Heating Pad, or Topical Capsaicin in the Treatment of Patients with Myofascial Pain Syndrome of the Upper Trapezius: A Pilot Study. *Pain Medicine* 2014;  
38 **15**(12): 2128-38.
- 39 179. Kirupa K, Divya Mary SM, Vaishnavi G, Nithya Nisha R, Rennie Mercy J, Jaiganesh G. A comparative study of ultrasound therapy and transcutaneous electrical  
40 nerve stimulation in reducing pain for temporomandibular joint disorder. *Drug invention today* 2019; **12**(3): 515-7.
- 41  
42  
43  
44  
45  
46

- 1  
2  
3 180. Knobel R, Radünz V, Carraro TEJT, Contexto-Enfermagem. Use of transcutaneous electric nerve stimulation for pain relief in labour: a possible way to care the  
4 child-bearer. 2005; **14**(2): 229-36.
- 5 181. Koca I, Boyaci A, Tutoglu A, Ucar M, Kocaturk O. Assessment of the effectiveness of interferential current therapy and TENS in the management of carpal tunnel  
6 syndrome: a randomized controlled study. *Rheumatology international* 2014; **34**(12): 1639-45.
- 7 182. Kofotolis ND, Vlachopoulos SP, Kellis E. Sequentially allocated clinical trial of rhythmic stabilization exercises and TENS in women with chronic low back pain.  
8 *Clinical rehabilitation* 2008; **22**(2): 99-111.
- 9 183. Koke AJ, Schouten JS, Lamerichs-Geelen MJ, et al. Pain reducing effect of three types of transcutaneous electrical nerve stimulation in patients with chronic pain: a  
10 randomized crossover trial. *Pain* 2004; **108**(1-2): 36-42.
- 11 184. Korkmaz OK, Capaci K, Eyigor C, Eyigor S. Pulsed radiofrequency versus conventional transcutaneous electrical nerve stimulation in painful shoulder: a  
12 prospective, randomized study. *Clinical rehabilitation* 2010; **24**(11): 1000-8.
- 13 185. Kumar S, Rajee A. Effect of progressive muscular relaxation exercises versus transcutaneous electrical nerve stimulation on tension headache: A comparative study.  
14 *Hong Kong Physiotherapy Journal* 2014; **32**(2): 86-91.
- 15 186. Labrecque M, Nouwen A, Bergeron M, Rancourt JF. A randomized controlled trial of nonpharmacologic approaches for relief of low back pain during labor. *The*  
16 *Journal of family practice* 1999; **48**(4): 259-63.
- 17 187. Laitinen J, Nuutinen L. Failure of transcutaneous electrical nerve stimulation and indomethacin to reduce opiate requirement following cholecystectomy. *Acta*  
18 *anaesthesiologica Scandinavica* 1991; **35**(8): 700-5.
- 19 188. Lang T, Barker R, Steinlechner B, et al. TENS relieves acute posttraumatic hip pain during emergency transport. *The Journal of trauma* 2007; **62**(1): 184-8;  
20 discussion 8.
- 21 189. Langley GB, Sheppard H, Johnson M, Wigley RD. The analgesic effects of transcutaneous electrical nerve stimulation and placebo in chronic pain patients. A  
22 double-blind non-crossover comparison. *Rheumatology international* 1984; **4**(3): 119-23.
- 23 190. Lauretti GR, Chubaci EF, Mattos AL. Efficacy of the use of two simultaneously TENS devices for fibromyalgia pain. *Rheumatology international* 2013; **33**(8):  
24 2117-22.
- 25 191. Lauretti GR, Oliveira R, Parada F, Mattos AL. The New Portable Transcutaneous Electrical Nerve Stimulation Device Was Efficacious in the Control of Primary  
26 Dysmenorrhea Cramp Pain. *Neuromodulation : journal of the International Neuromodulation Society* 2015; **18**(6): 522-6; discussion -7.
- 27 192. Law PP, Cheing GL. Optimal stimulation frequency of transcutaneous electrical nerve stimulation on people with knee osteoarthritis. *Journal of rehabilitation*  
28 *medicine* 2004; **36**(5): 220-5.
- 29 193. Law PPW, Cheing GLY, Tsui AYY. Does transcutaneous electrical nerve stimulation improve the physical performance of people with knee osteoarthritis? *Journal*  
30 *of Clinical Rheumatology* 2004; **10**(6): 295-9.
- 31 194. Leandri M, Parodi CI, Corrieri N, Rigardo S. Comparison of TENS treatments in hemiplegic shoulder pain. *Scandinavian journal of rehabilitation medicine* 1990;  
32 **22**(2): 69-71.
- 33 195. Lee E, Chung I, Lee J, Lam P, Chin R. The role of transcutaneous electrical nerve stimulation in management of labour in obstetric patients. *Asia Oceania J Obstet*  
34 *Gynaecol* 1990; **16**(3): 247-54.
- 35 196. Lee CH, Lee TY, Her JS, Liao WL, Hsieh CL. Single-Blinded, Randomized Preliminary Study Evaluating the Effect of Transcutaneous Electrical Nerve Stimulation  
36 on Postoperative Pain in Patients with Colles' Fracture. *Journal of alternative and complementary medicine (New York, NY)* 2015; **21**(12): 754-8.
- 37 197. Lee JE, Anderson CM, Perkhounkova Y, Sleeuwenhoek BM, Louison RR. Transcutaneous Electrical Nerve Stimulation Reduces Resting Pain in Head and Neck  
38 Cancer Patients A Randomized and Placebo-Controlled Double-Blind Pilot Study. *Cancer Nursing* 2019; **42**(3): 218-28.
- 39 198. Leo KC, Dostal WF, Bossen DG, Eldridge VL, Fairchild ML, Evans RE. Effect of transcutaneous electrical nerve stimulation characteristics on clinical pain.  
40 *Physical therapy* 1986; **66**(2): 200-5.
- 41  
42  
43  
44  
45  
46



199. Leonard G, Cloutier C, Marchand S. Reduced analgesic effect of acupuncture-like TENS but not conventional TENS in opioid-treated patients. *The journal of pain : official journal of the American Pain Society* 2011; **12**(2): 213-21.
200. Lewers D, Clelland J, Jackson J, Varner R, Bergman J. Transcutaneous electrical nerve stimulation in the relief of primary dysmenorrhea. *Physical therapy* 1989; **69**(1): 3-9.
201. Lewis D, Lewis B, Sturrock R. Transcutaneous electrical nerve stimulation in osteoarthritis: a therapeutic alternative? *Annals of the rheumatic diseases* 1984; **43**(1): 47-9.
202. Lewis B, Lewis D, Cumming G. The comparative analgesic efficacy of transcutaneous electrical nerve stimulation and a non-steroidal anti-inflammatory drug for painful osteoarthritis. *British journal of rheumatology* 1994; **33**(5): 455-60.
203. Likar R, Molnar M, Pipam W, et al. Postoperative transcutaneous electrical nerve stimulation (TENS) in shoulder surgery (randomized, double blind, placebo controlled pilot trial). [German]. *Schmerz (Berlin, Germany)* 2001; **15**(3): 158-63.
204. Lim AT, Edis G, Kranz H, Mendelson G, Selwood T, Scott DF. Postoperative pain control: contribution of psychological factors and transcutaneous electrical stimulation. *Pain* 1983; **17**(2): 179-88.
205. Lima PMB, Farias RTFB, Carvalho ACA, da Silva PNC, Filho NAF, de Brito RF. Transcutaneous electrical nerve stimulation after coronary artery bypass graft surgery. *Brazilian Journal of Cardiovascular Surgery* 2011; **26**(4): 591-6.
206. Limoges MF, Rickabaugh B. Evaluation of TENS during screening flexible sigmoidoscopy. *Gastroenterology nursing : the official journal of the Society of Gastroenterology Nurses and Associates* 2004; **27**(2): 61-8.
207. Lin ML, Luo YJ, Hsu YM, et al. Randomized controlled trial Comparing of Analgesic Effectiveness of TPRF and TENs in Clinical and Endocrinological Changes for Chronic Shoulder Pain; 2015.
208. Lin M-L, Chiu H-W, Shih Z-M, et al. Two Transcutaneous Stimulation Techniques in Shoulder Pain: Transcutaneous Pulsed Radiofrequency (TPRF) versus Transcutaneous Electrical Nerve Stimulation (TENS): A Comparative Pilot Study. *Pain research & management* 2019; **2019**: 2823401.
209. Linde C, Isacsson G, Jonsson BG. Outcome of 6-week treatment with transcutaneous electric nerve stimulation compared with splint on symptomatic temporomandibular joint disk displacement without reduction. *Acta odontologica scandinavica* 1995; **53**(2): 92-8.
210. Linn SL, Granat MH, Lees KR. Prevention of shoulder subluxation after stroke with electrical stimulation. *Stroke* 1999; **30**(5): 963-8.
211. Lison JF, Amer-Cuenca JJ, Piquer-Marti S, Benavent-Caballer V, Bivia-Roig G, Marin-Buck A. Transcutaneous Nerve Stimulation for Pain Relief During Office Hysteroscopy: A Randomized Controlled Trial. *Obstetrics and gynecology* 2017; **129**(2): 363-70.
212. Liu YC, Liao WS, Lien IN. Effect of transcutaneous electrical nerve stimulation for post-thoracotomy pain. *Taiwan I Hsueh Hui Tsa Chih* 1985; **84**(7): 801-9.
213. Liu Y, Dong Z, Wang R, et al. Migraine Prevention Using Different Frequencies of Transcutaneous Occipital Nerve Stimulation: A Randomized Controlled Trial. *The journal of pain : official journal of the American Pain Society* 2017; **18**(8): 1006-15.
214. Lofgren M, Norrbrink C. Pain relief in women with fibromyalgia: a cross-over study of superficial warmth stimulation and transcutaneous electrical nerve stimulation. *Journal of rehabilitation medicine* 2009; **41**(7): 557-62.
215. Luchesa CA, Greca FH, Guarita-Souza LC, Luiz Verde dos Santos J, Aquim EE. The role of electroanalgesia in patients undergoing coronary artery bypass surgery. [Portuguese]. *Brazilian Journal of Cardiovascular Surgery* 2009; **24**(3): 391-6.
216. Lundeborg T. A comparative study of the pain alleviating effect of vibratory stimulation, transcutaneous electrical nerve stimulation, electroacupuncture and placebo. *The American journal of Chinese medicine* 1984; **12**(1-4): 72-9.
217. Lundeborg T, Bondesson L, Lundstrom V. Relief of primary dysmenorrhea by transcutaneous electrical nerve stimulation. *Acta obstetrica et gynecologica Scandinavica* 1985; **64**(6): 491-7.
218. Machado AFP, Perracini MR, Rampazo ÉP, Driusso P, Liebano RE. Effects of thermotherapy and transcutaneous electrical nerve stimulation on patients with primary dysmenorrhea: A randomized, placebo-controlled, double-blind clinical trial. *Complementary therapies in medicine* 2019; **47**: N.PAG.
219. Machin D, Lewith GT, Wylson S. Pain measurement in randomized clinical trials. A comparison of two pain scales. *Clinical Journal of Pain* 1988; **4**(3): 161-8.

- 1  
2  
3 220. Mahure SA, Rokito AS, Kwon YW. Transcutaneous electrical nerve stimulation for postoperative pain relief after arthroscopic rotator cuff repair: a prospective  
4 double-blinded randomized trial. *Journal of shoulder and elbow surgery* 2017; **26**(9): 1508-13.
- 5 221. Manigandan JB, Ganesh GS, Pattnaik M, Mohanty P. Effect of electrical stimulation to long head of biceps in reducing gleno humeral subluxation after stroke.  
6 *NeuroRehabilitation* 2014; **34**(2): 245-52.
- 7 222. Mannheimer C, Carlsson C. The analgesic effect of transcutaneous electrical nerve stimulation (TNS) in patients with rheumatoid arthritis. A comparative study of  
8 different pulse patterns. *Pain* 1979; **6**(3): 329-34.
- 9 223. Mannheimer J, Whalen E. The efficacy of transcutaneous electric nerve stimulation in dysmenorrhea. *Clinical Journal of Pain* 1985; **1**: 75-83.
- 10 224. Mannheimer C, Lund S, Carlsson CA. The effect of transcutaneous electrical nerve stimulation (TNS) on joint pain in patients with rheumatoid arthritis.  
11 *Scandinavian journal of rheumatology* 1978; **7**(1): 13-6.
- 12 225. Mannheimer C, Carlsson C, Emanuelsson H, Vedin A, Waagstein F, Wilhelmsson C. The effects of transcutaneous electrical nerve stimulation in patients with  
13 severe angina pectoris. *Circulation* 1985; **71**(2): 308-16.
- 14 226. Mansourian A, Pourshahidi S, Sadrzadeh-Afshar MS, Ebrahimi H. A Comparative Study of Low-Level Laser Therapy and Transcutaneous Electrical Nerve  
15 Stimulation as an Adjunct to Pharmaceutical Therapy for Myofascial Pain Dysfunction Syndrome: A Randomized Clinical Trial. *Frontiers in dentistry* 2019; **16**(4): 256-64.
- 16 227. Mansuri B, Torabinezhad F, Jamshidi AA, Dabirmoghaddam P, Vasaghi-Gharamaleki B, Ghelichi L. Application of High-Frequency Transcutaneous Electrical  
17 Nerve Stimulation in Muscle Tension Dysphonia Patients With the Pain Complaint: The Immediate Effect. *Journal of Voice* 2019.
- 18 228. Mansuri B, Torabinezhad F, Jamshidi AA, Dabirmoghaddam P, Vasaghi-Gharamaleki B, Ghelichi L. Transcutaneous Electrical Nerve Stimulation Combined With  
19 Voice Therapy in Women With Muscle Tension Dysphonia. *Journal of Voice* 2020; **34**(3): 490.e11-e21.
- 20 229. Marchand S, Charest J, Li J, Chenard J, Lavignolle B, Laurencelle L. Is TENS purely a placebo effect? A controlled study on chronic low back pain [see comments].  
21 *Pain* 1993; **54**(1): 99-106.
- 22 230. Mascarin NC, Vancini RL, Andrade ML, Magalhaes Ede P, de Lira CA, Coimbra IB. Effects of kinesiotherapy, ultrasound and electrotherapy in management of  
23 bilateral knee osteoarthritis: prospective clinical trial. *BMC musculoskeletal disorders* 2012; **13**: 182.
- 24 231. McCallum M, Glynn C, Moore R, Lammer P, Phillips A. Transcutaneous electrical nerve stimulation in the management of acute postoperative pain. *British journal*  
25 *of anaesthesia* 1988; **61**(3): 308-12.
- 26 232. Melzack R, Vetere P, Finch L. Transcutaneous electrical nerve stimulation for low back pain. A comparison of TENS and massage for pain and range of motion.  
27 *Physical therapy* 1983; **63**(4): 489-93.
- 28 233. Merrill D. Clinical evaluation of FasTENS, an inexpensive, disposable transcutaneous electrical nerve stimulator designed specifically for postoperative  
29 electroanalgesia. *Urology* 1989; **33**(1): 27-30.
- 30 234. Miller L, Mattison P, Paul L, Wood L. The effects of transcutaneous electrical nerve stimulation (TENS) on spasticity in multiple sclerosis. *Multiple sclerosis*  
31 *(Houndmills, Basingstoke, England)* 2007; **13**(4): 527-33.
- 32 235. Milsom I, Hedner N, Mannheimer C. A comparative study of the effect of high-intensity transcutaneous nerve stimulation and oral naproxen on intrauterine pressure  
33 and menstrual pain in patients with primary dysmenorrhea. *American journal of obstetrics and gynecology* 1994; **170**(1 Pt 1): 123-9.
- 34 236. Moharic M, Marincek C, Vidmar G, Burger H. TRANSCUTANEOUS ELECTRICAL NERVE STIMULATION, PREGABALIN AND THEIR COMBINATION  
35 IN PATIENTS WITH PAINFUL DIABETIC NEUROPATHY: EFFECTS ON PAIN AND QUALITY OF LIFE. *Zdravniški Vestnik-Slovenian Medical Journal* 2009; **78**(8):  
36 371-80.
- 37 237. Mondal P, Biswas M, Saha J, Middhya AK. Effect of Trigger Point Injection Vs Ultrasonic Therapy Vs Transcutaneous Electrical Nerve Stimulation in  
38 Rehabilitation of Cervical and Peri-Scapular Myofascial Pain Syndrome- a Randomized Clinical Trial. *Journal of Evolution of Medical and Dental Sciences-Jemds* 2019;  
39 **8**(7): 430-6.
- 40 238. Moore SR, Shurman J. Combined neuromuscular electrical stimulation and transcutaneous electrical nerve stimulation for treatment of chronic back pain: a double-  
41 blind, repeated measures comparison. *Archives of physical medicine and rehabilitation* 1997; **78**(1): 55-60.
- 42  
43  
44  
45  
46

- 1  
2  
3 239. Mora B, Giorni E, Dobrovits M, et al. Transcutaneous electrical nerve stimulation: an effective treatment for pain caused by renal colic in emergency care. *The Journal of urology* 2006; **175**(5): 1737-41; discussion 41.
- 4 240. Morgan B, Jones AR, Mulcahy KA, Finlay DB, Collett B. Transcutaneous electric nerve stimulation (TENS) during distension shoulder arthrography: a controlled trial. *Pain* 1996; **64**(2): 265-7.
- 5 241. Møystad A, Krogstad BS, Larheim TA. Transcutaneous nerve stimulation in a group of patients with rheumatic disease involving the temporomandibular joint. *Journal of prosthetic dentistry* 1990; **64**(5): 596-600.
- 6 242. Murray S, Collins PD, James MA. An investigation into the 'carry over' effect of neurostimulation in the treatment of angina pectoris. *International journal of clinical practice* 2004; **58**(7): 669-74.
- 7 243. Mutlu B, Paker N, Bugdayci D, Tekdos D, Kesiktas N. Efficacy of supervised exercise combined with transcutaneous electrical nerve stimulation in women with fibromyalgia: a prospective controlled study. *Rheumatology international* 2013; **33**(3): 649-55.
- 8 244. Nabi BN, Sedighinejad A, Haghighi M, et al. Comparison of transcutaneous electrical nerve stimulation and pulsed radiofrequency sympathectomy for treating painful diabetic neuropathy. 2015; **5**(5).
- 9 245. Nash TP, Williams JD, Machin D. TENS: Does the type of stimulus really matter? *Pain Clinic* 1990; **3**(3): 161-8.
- 10 246. Navarathnam RG, Wang IY, Thomas D, Klineberg PL. Evaluation of the transcutaneous electrical nerve stimulator for postoperative analgesia following cardiac surgery. *Anaesthesia and intensive care* 1984; **12**(4): 345-50.
- 11 247. Neary J. Transcutaneous electrical nerve stimulation for the relief of post-incisional surgical pain. *AANA J* 1981; **49**(2): 151-5.
- 12 248. Neighbours LE, Clelland J, Jackson JR, Bergman J, Orr J. Transcutaneous electrical nerve stimulation for pain relief in primary dysmenorrhea. *The Clinical journal of pain* 1987; **3**(1): 17-22.
- 13 249. Nesheim BI. The use of transcutaneous nerve stimulation for pain relief during labor. A controlled clinical study. *Acta obstetrica et gynecologica Scandinavica* 1981; **60**(1): 13-6.
- 14 250. Neumark J, Pauser G, Scherzer W. Pain relief in childbirth; an analysis of the analgesic effects of transcutaneous nerve stimulation (TNS), pethidine and placebos (author's transl). *Praktische anasthesie, wiederbelebung und intensivtherapie* 1978; **13**(1): 13-20.
- 15 251. Ng MM, Leung MC, Poon DM. The effects of electro-acupuncture and transcutaneous electrical nerve stimulation on patients with painful osteoarthritic knees: a randomized controlled trial with follow-up evaluation. *Journal of alternative and complementary medicine (New York, NY)* 2003; **9**(5): 641-9.
- 16 252. Nordemar R, Thorner C. Treatment of acute cervical pain - A comparative group study. *Pain* 1981; **10**(1): 93-101.
- 17 253. Norrbrink C. Transcutaneous electrical nerve stimulation for treatment of spinal cord injury neuropathic pain. *Journal of rehabilitation research and development* 2009; **46**(1): 85-93.
- 18 254. Olsén MF, Elden H, Janson ED, Lilja H, Stener-Victorin E. A comparison of high- versus low-intensity, high-frequency transcutaneous electric nerve stimulation for painful postpartum uterine contractions. *Acta obstetrica et gynecologica Scandinavica* 2007; **86**(3): 310-4.
- 19 255. Fagevik Olsen M, Bjordahl S, Stahl A, Borjesson S, Sundemo A, Gutke A. Effects of high-intensity high-frequency transcutaneous electric nerve stimulation in primary dysmenorrhea-a randomised cross-over pilot study. *European Journal of Physiotherapy* 2019.
- 20 256. Oncel M, Sencan S, Yildiz H, Kurt N. Transcutaneous electrical nerve stimulation for pain management in patients with uncomplicated minor rib fractures. *European journal of cardio-thoracic surgery : official journal of the European Association for Cardio-thoracic Surgery* 2002; **22**(1): 13-7.
- 21 257. Oosterhof J, De Boo TM, Oostendorp RA, Wilder-Smith OH, Crul BJ. Outcome of transcutaneous electrical nerve stimulation in chronic pain: short-term results of a double-blind, randomised, placebo-controlled trial. *The journal of headache and pain* 2006; **7**(4): 196-205.
- 22 258. Oosterhof J, Samwel HJ, de Boo TM, Wilder-Smith OH, Oostendorp RA, Crul BJ. Predicting outcome of TENS in chronic pain: a prospective, randomized, placebo controlled trial. *Pain* 2008; **136**(1-2): 11-20.
- 23 259. Oosterhof J, Wilder-Smith OH, de Boo T, Oostendorp RA, Crul BJ. The long-term outcome of transcutaneous electrical nerve stimulation in the treatment for patients with chronic pain: a randomized, placebo-controlled trial. *Pain practice : the official journal of World Institute of Pain* 2012; **12**(7): 513-22.
- 24  
25  
26  
27  
28  
29  
30  
31  
32  
33  
34  
35  
36  
37  
38  
39  
40  
41  
42  
43  
44  
45  
46

- 1  
2  
3 260. Oosterhof J, Wilder-Smith OH, Oostendorp RA, Crul BJ. Different mechanisms for the short-term effects of real versus sham transcutaneous electrical nerve  
4 stimulation (TENS) in patients with chronic pain: a pilot study. *Journal of pain & palliative care pharmacotherapy* 2012; **26**(1): 5-12.
- 5 261. Ordog GJ. Transcutaneous electrical nerve stimulation versus oral analgesic: a randomized double-blind controlled study in acute traumatic pain. *The American*  
6 *journal of emergency medicine* 1987; **5**(1): 6-10.
- 7 262. Ozkaraoglu DK, Tarakci D, Algun ZC. Comparison of two different electrotherapy methods in low back pain treatment. *Journal of Back & Musculoskeletal*  
8 *Rehabilitation* 2020; **33**(2): 193-9.
- 9 263. Ozkul C, Kilinc M, Yildirim SA, Topcuoglu EY, Akyuz M. Effects of visual illusion and transcutaneous electrical nerve stimulation on neuropathic pain in patients  
10 with spinal cord injury: A randomised controlled cross-over trial. *Journal of back and musculoskeletal rehabilitation* 2015; **28**(4): 709-19.
- 11 264. Oztas B, Iyigun E. The effects of two different electrical stimulation methods on the pain intensity of the patients who had undergone abdominal surgery with a  
12 midline incision: Randomized Controlled Clinical Trial. *Contemporary nurse* 2019: 1-21.
- 13 265. Ozturk NK, Baki ED, Kavakli AS, et al. Comparison of Transcutaneous Electrical Nerve Stimulation and Parasternal Block for Postoperative Pain Management  
14 after Cardiac Surgery. *Pain research & management* 2016; **2016**: 4261949.
- 15 266. Padma, Prasanna A, Urala. Transcutaneous electrical nerve stimulation and labor pain. *Bahrain Medical Bulletin* 2000; **22**(1): 13-7.
- 16 267. Paker N, Tekdos D, Kesiktas N, Soy D. Comparison of the therapeutic efficacy of TENS versus intra-articular hyaluronic acid injection in patients with knee  
17 osteoarthritis: a prospective randomized study. *Advances in therapy* 2006; **23**(2): 342-53.
- 18 268. Palmer S, Domaille M, Cramp F, et al. Transcutaneous electrical nerve stimulation as an adjunct to education and exercise for knee osteoarthritis: a randomized  
19 controlled trial. *Arthritis care & research* 2014; **66**(3): 387-94.
- 20 269. Pan P, Chou C, Chiou H, Ma H, Lee H, Chan R. Extracorporeal shock wave therapy for chronic calcific tendinitis of the shoulders: a functional and sonographic  
21 study. *Archives of Physical Medicine & Rehabilitation* 2003; **84**(7): 988-93.
- 22 270. Park C, Choi JB, Lee YS, et al. The effect of intra-operative transcutaneous electrical nerve stimulation on posterior neck pain following thyroidectomy. *Anaesthesia*  
23 2015; **70**(4): 434-9.
- 24 271. Patil SR, Aileni KR. Effect of transcutaneous electrical nerve stimulation versus home exercise programme in management of temporomandibular joint disorder.  
25 *Journal of Clinical and Diagnostic Research* 2017; **11**(12): ZC19-ZC22.
- 26 272. Peacock KS, Stoerkel E, Libretto S, et al. A randomized trial comparing the Tennant Biomodulator to transcutaneous electrical nerve stimulation and traditional  
27 Chinese acupuncture for the treatment of chronic pain in military service members. *Military Medical Research* 2019; **6**(1): 37.
- 28 273. Pietrosimone BG, Hart JM, Saliba SA, Hertel J, Ingersoll CD. Immediate effects of transcutaneous electrical nerve stimulation and focal knee joint cooling on  
29 quadriceps activation. *Medicine and science in sports and exercise* 2009; **41**(6): 1175-81.
- 30 274. Pietrosimone BG, Saliba SA, Hart JM, Hertel J, Kerrigan DC, Ingersoll CD. Effects of transcutaneous electrical nerve stimulation and therapeutic exercise on  
31 quadriceps activation in people with tibiofemoral osteoarthritis. *The Journal of orthopaedic and sports physical therapy* 2011; **41**(1): 4-12.
- 32 275. Pietrosimone BG, Saliba SA, Hart JM, Hertel J, Kerrigan DC, Ingersoll CD. Effects of disinhibitory transcutaneous electrical nerve stimulation and therapeutic  
33 exercise on sagittal plane peak knee kinematics and kinetics in people with knee osteoarthritis during gait: a randomized controlled trial. *Clinical rehabilitation* 2010; **24**(12):  
34 1091-101.
- 35 276. Pietrosimone B, Luc-Harkey BA, Harkey MS, et al. Using TENS to Enhance Therapeutic Exercise in Individuals with Knee Osteoarthritis. *Medicine and science in*  
36 *sports and exercise* 2020.
- 37 277. Pike PM. Transcutaneous electrical stimulation. Its use in the management of postoperative pain. *Anaesthesia* 1978; **33**(2): 165-71.
- 38 278. Pitangui AC, de Sousa L, Gomes FA, Ferreira CH, Nakano AM. High-frequency TENS in post-episiotomy pain relief in primiparous puerpere: a randomized,  
39 controlled trial. *The journal of obstetrics and gynaecology research* 2012; **38**(7): 980-7.
- 40 279. Pitangui AC, Araújo RC, Bezerra MJ, Ribeiro CO, Nakano AM. Low and high-frequency TENS in post-episiotomy pain relief: a randomized, double-blind clinical  
41 trial. *Brazilian journal of physical therapy* 2014; **18**(1): 72-8.
- 42  
43  
44  
45  
46



- 1  
2  
3 280. Platon B, Andrell P, Raner C, Rudolph M, Dvoretzky A, Mannheimer C. High-frequency, high-intensity transcutaneous electrical nerve stimulation as treatment of  
4 pain after surgical abortion. *Pain* 2010; **148**(1): 114-9.
- 5 281. Platon B, Mannheimer C, Andrell P. Effects of high-frequency, high-intensity transcutaneous electrical nerve stimulation versus intravenous opioids for pain relief  
6 after gynecologic laparoscopic surgery: a randomized controlled study. *Korean Journal of Anesthesiology* 2018; **71**(2): 149-56.
- 7 282. Prabhakar R, Ramteke G. Cervical Spinal Mobilization Versus TENS in the Management of Cervical Radiculopathy: A Comparative, Experimental, Randomized  
8 controlled trial. *Indian Journal of Physiotherapy and Occupational Therapy* 2011; **5**(2): 128-33.
- 9 283. Presser M, Birkhan J, Adler R, Hanani A, Eisenberg E. Transcutaneous electrical nerve stimulation (TENS) during epidural steroids injection: a randomized  
10 controlled trial. *Pain Clinic* 2000; **12**(2): 77-80.
- 11 284. Rainov NG, Heidecke V, Albertz C, Burkert W. Transcutaneous electrical nerve stimulation (TENS) for acute postoperative pain after spinal surgery. *European*  
12 *Journal of Pain* 1994; **15**(2-3): 44-9.
- 13 285. Rajfur J, Pasternok M, Rajfur K, et al. Efficacy of Selected Electrical Therapies on Chronic Low Back Pain: a Comparative Clinical Pilot Study. *Medical science*  
14 *monitor* 2017; **23**: 85-100.
- 15 286. Rajpurohit B, Khatri SM, Metgud D, Bagewadi A. Effectiveness of transcutaneous electrical nerve stimulation and microcurrent electrical nerve stimulation in  
16 bruxism associated with masticatory muscle pain--a comparative study. *Indian journal of dental research : official publication of Indian Society for Dental Research* 2010;  
17 **21**(1): 104-6.
- 18 287. Raket B, Frantz R. Effectiveness of transcutaneous electrical nerve stimulation on postoperative pain with movement. *The journal of pain : official journal of the*  
19 *American Pain Society* 2003; **4**(8): 455-64.
- 20 288. Raket BA, Zimmerman MB, Geasland K, et al. Transcutaneous electrical nerve stimulation for the control of pain during rehabilitation after total knee arthroplasty:  
21 A randomized, blinded, placebo-controlled trial. *Pain* 2014; **155**(12): 2599-611.
- 22 289. Ramanathan D, Saleh A, Klika AK, Higuera CA, Barsoum WK. The Use of Transcutaneous Electrical Nerve Stimulation After Total Knee Arthroplasty: A  
23 Prospective Randomized Controlled Trial. *Surgical technology international* 2017; **30**: 425-34.
- 24 290. Ramos LAV, Callegari B, Franca FJR, et al. Comparison Between Transcutaneous Electrical Nerve Stimulation and Stabilization Exercises in Fatigue and  
25 Transversus Abdominis Activation in Patients With Lumbar Disk Herniation: A Randomized Study. *Journal of manipulative and physiological therapeutics* 2018; **41**(4):  
26 323-31.
- 27 291. Rani P, Kalyani V, Goyal T, Yadav R, Mishra R. Effect of Transcutaneous Electrical Nerve Stimulation Therapy on Pain and Functional Disability Level among  
28 Patients with Rotator Cuff Disease- a Randomized Controlled Trial. *International Journal of Physiotherapy* 2020; **7**(1): 7-13.
- 29 292. Ratajczak B, Hawrylak A, Demidaś A, Kuciel-Lewandowska J, Boerner E. Effectiveness of diadynamic currents and transcutaneous electrical nerve stimulation in  
30 disc disease lumbar part of spine. *Journal of Back & Musculoskeletal Rehabilitation* 2011; **24**(3): 155-9.
- 31 293. Rawat B, Genz A, Fache JS, Ong M, Coldman AJ, Burhenne HJ. Effectiveness of transcutaneous electrical nerve stimulation (TENS) for analgesia during biliary  
32 lithotripsy. *Invest Radiol* 1991; **26**(10): 866-9.
- 33 294. Renovato França FJ, Nogueira Burke T, Oliveira Magalhães M, et al. Motor Control Training Compared With Transcutaneous Electrical Nerve Stimulation in  
34 Patients With Disc Herniation With Associated Radiculopathy: A Randomized Controlled Trial. *American journal of physical medicine & rehabilitation* 2019; **98**(3): 207-14.
- 35 295. Reuss R, Cronen P, Abplanalp L. Transcutaneous electrical nerve stimulation for pain control after cholecystectomy: lack of expected benefits. *Southern medical*  
36 *journal* 1988; **81**(11): 1361-3.
- 37 296. Revadkar MT, Bhojwani TM. Comparison of the Effectiveness of Transcutaneous Electrical Nerve Stimulation (Tens) Vs. Interferential Therapy (Ift) for Relief of  
38 Pain in Primary Dysmenorrhea. *International Journal of Physiotherapy* 2019; **6**(6): 263-7.
- 39 297. Ringel G, Taubert K. Zur effektivitat der transkutanen elektrischen nervenstimulation bei migrane (The efficacy of transcutaneous nerve stimulation in migraine)  
40 [German]. *Zeitschrift fur Physiotherapie* 1991 Jan; **43**(1):8-11 1991.
- 41  
42  
43  
44  
45  
46

- 1  
2  
3 298. Robb KA, Newham DJ, Williams JE. Transcutaneous electrical nerve stimulation vs. transcutaneous spinal electroanalgesia for chronic pain associated with breast  
4 cancer treatments. *Journal of pain and symptom management* 2007; **33**(4): 410-9.
- 5 299. Robinson R, Darlow S, Wright SJ, et al. Is transcutaneous electrical nerve stimulation an effective analgesia during colonoscopy? *Postgraduate medical journal*  
6 2001; **77**(909): 445-6.
- 7 300. Roche PA, Gijsbers K, Belch JJ, Forbes CD. Modification of haemophilic haemorrhage pain by transcutaneous electrical nerve stimulation. *Pain* 1985; **21**(1): 43-8.
- 8 301. Rooney SM, Jain S, Goldiner PL. Effect of transcutaneous nervous stimulation on postoperative pain after thoracotomy. *Anesthesia and analgesia* 1983; **62**(11):  
9 1010-2.
- 10 302. Rosenberg M, Curtis L, Bourke D. Transcutaneous electrical nerve stimulation for the relief of postoperative pain. *Pain* 1978; **5**(2): 129-33.
- 11 303. Rutgers MJ, Van-Romunde L, Osman P. A small randomised comparative trial of acupuncture verses transcutaneous electrical neurostimulation in postherpetic  
12 neuralgia. *Pain Clinic* 1988; **2**: 87-9.
- 13 304. Sadala AY, Machado AFP, Liebano RE. Effects of transcutaneous electrical nerve stimulation on pain intensity during application of carboxytherapy in patients with  
14 cellulite: A randomized placebo-controlled trial. *Journal of cosmetic dermatology* 2018; **17**(6): 1175-81.
- 15 305. Sahin N, Albayrak I, Ugurlu H. Effect of different transcutaneous electrical stimulation modalities on cervical myofascial pain syndrome. *Journal of*  
16 *Musculoskeletal Pain* 2011; **19**(1): 18-23.
- 17 306. Samadzadeh S, Rezavand N, Yari M, Rezaei M, Faizmahdavi H, Hematti M. Comparison of Entonox and Transcutaneous Electrical Nerve Stim-ulation (TENS) in  
18 labor pain. *Journal of Medical and Biomedical Sciences* 2017; **6**(2): 11-6.
- 19 307. Sangtong K, Chupinijrobkob C, Putthakumnerd W, Kuptniratsaikul V. Does adding transcutaneous electrical nerve stimulation to therapeutic ultrasound affect pain  
20 or function in people with osteoarthritis of the knee? A randomized controlled trial. *Clinical rehabilitation* 2019; **33**(7): 1197-205.
- 21 308. Santamato A, Notarnicola A, Panza F, et al. SBOTE study: Extracorporeal shock wave therapy versus electrical stimulation after botulinum toxin type a injection for  
22 post-stroke spasticity-a prospective randomized trial. *Ultrasound in Medicine and Biology* 2013; **39**(2): 283-91.
- 23 309. Santana LS, Gallo RB, Ferreira CH, Duarte G, Quintana SM, Marcolin AC. Transcutaneous electrical nerve stimulation (TENS) reduces pain and postpones the  
24 need for pharmacological analgesia during labour: a randomised trial. *Journal of physiotherapy* 2016; **62**(1): 29-34.
- 25 310. Saranya B, Ahmed J, Shenoy N, Ongole R, Sujir N, Natarajan S. Comparison of Transcutaneous Electric Nerve Stimulation (TENS) and Microcurrent Nerve  
26 Stimulation (MENS) in the Management of Masticatory Muscle Pain: A Comparative Study. *Pain research & management* 2019; **2019**: 8291624.
- 27 311. Sayilir S, Yildizgoren MT. The medium-term effects of diadynamic currents in chronic low back pain; TENS versus diadynamic currents: a randomised, follow-up  
28 study. *Complementary therapies in clinical practice* 2017; **29**: 16-9.
- 29 312. Seo HG, Bang MS, Chung SG, Jung SH, Lee S-U. Effect of Electrical Stimulation on Botulinum Toxin A Therapy in Patients With Chronic Myofascial Pain  
30 Syndrome: A 16-Week Randomized Double-Blinded Study. *Archives of Physical Medicine & Rehabilitation* 2013; **94**(3): 412-8.
- 31 313. Serry ZMH, Mossa G, Elhabashy H, et al. Transcutaneous nerve stimulation versus aerobic exercise in diabetic neuropathy. *Egyptian Journal of Neurology,*  
32 *Psychiatry and Neurosurgery* 2016; **53**(2): 124-9.
- 33 314. Sezen CB, Akboga SA, Celik A, Kalafat CE, Tastepe AI. Transcutaneous electrical nerve stimulation effect on postoperative complications. *Asian cardiovascular &*  
34 *thoracic annals* 2017; **25**(4): 276-80.
- 35 315. Shahoei R, Shahghebi S, Rezaei M, Naqshbandi S. The effect of transcutaneous electrical nerve stimulation on the severity of labor pain among nulliparous women:  
36 A clinical trial. *Complementary therapies in clinical practice* 2017; **28**: 176-80.
- 37 316. Shehab D, Adham N. Comparative effectiveness of ultrasound and transcutaneous electrical stimulation in treatment of periarticular shoulder pain. *Physiother Can*  
38 2000; **52**(3): 208-14.
- 39 317. Sherry E, Kitchener P, Smart R. A prospective randomized controlled study of VAX-D and TENS for the treatment of chronic low back pain. *Neurological research*  
40 2001; **23**(7): 780-4.
- 41  
42  
43  
44  
45  
46



- 1  
2  
3 318. Shimoji K, Takahashi N, Nishio Y, Koyanagi M, Aida S. Pain relief by transcutaneous electric nerve stimulation with bidirectional modulated sine waves in patients  
4 with chronic back pain: a randomized, double-blind, sham-controlled study. *Neuromodulation* 2007 Jan;10(1):42-51 2007.
- 5 319. Shimoura K, Iijima H, Suzuki Y, Aoyama T. Immediate Effects of Transcutaneous Electrical Nerve Stimulation on Pain and Physical Performance in Individuals  
6 With Preradiographic Knee Osteoarthritis: A Randomized Controlled Trial. *Archives of Physical Medicine & Rehabilitation* 2019; **100**(2): 300-.
- 7 320. Shoukry RA, Al-Ansary AM. Transcutaneous Electric Nerve Stimulation (TENS) for pain relief during Extracorporeal Shock-Wave Lithotripsy (ESWL). *Egyptian  
8 Journal of Anaesthesia* 2019; **35**(1): 65-70.
- 9 321. Siemens W, Boehlke C, Bennett MI, Offner K, Becker G, Gaertner J. Transcutaneous electrical nerve stimulation for advanced cancer pain inpatients in specialist  
10 palliative care—a blinded, randomized, sham-controlled pilot cross-over trial. *Supportive Care in Cancer* 2020.
- 11 322. Sikiru L, Shmaila H, Muhammed SA. Transcutaneous electrical nerve stimulation (TENS) in the symptomatic management of chronic prostatitis/chronic pelvic pain  
12 syndrome: a placebo-control randomized trial. *International braz j urol : official journal of the Brazilian Society of Urology* 2008; **34**(6): 708-13; discussion 14.
- 13 323. Silva MB, de Melo PR, de Oliveira NM, Crema E, Fernandes LF. Analgesic effect of transcutaneous electrical nerve stimulation after laparoscopic cholecystectomy.  
14 *American journal of physical medicine & rehabilitation* 2012; **91**(8): 652-7.
- 15 324. Silva JG, Gonçalves Santana C, Inocência KR, Orsini M, Machado S, Bergmann A. Electrocortical Analysis of Patients with Intercostobrachial Pain Treated with  
16 TENS after Breast Cancer Surgery. *Journal of Physical Therapy Science* 2014; **26**(3): 349-53.
- 17 325. Sim DT. Effectiveness of transcutaneous electrical nerve stimulation following cholecystectomy. *Physiotherapy* 1991; **77**(10): 715-22.
- 18 326. Siqueira LTD, Ribeiro VV, Moreira PAM, Brasolotto AG, de Jesus Guirro RR, Alves Silverio KC. Effects of transcutaneous electrical nervous stimulation (TENS)  
19 associated with vocal therapy on musculoskeletal pain of women with behavioral dysphonia: A randomized, placebo-controlled double-blind clinical trial. *Journal of  
20 communication disorders* 2019; **82**: N.PAG.
- 21 327. Sloan JP, Muwanga CL, Waters EA, Dove AF, Dave SH. Multiple rib fractures: transcutaneous nerve stimulation versus conventional analgesia. *The Journal of  
22 trauma* 1986; **26**(12): 1120-2.
- 23 328. Smania N, Corato E, Fiaschi A, Pietropoli P, Aglioti SM, Tinazzi M. Repetitive magnetic stimulation: a novel therapeutic approach for myofascial pain syndrome.  
24 *Journal of neurology* 2005; **252**(3): 307-14.
- 25 329. Smedley F, Taube M, Wastell C. Transcutaneous electrical nerve stimulation for pain relief following inguinal hernia repair: a controlled trial. *European surgical  
26 research Europäische chirurgische Forschung Recherches chirurgicales europeennes* 1988; **20**(4): 233-7.
- 27 330. Smith C, Lewith G, Machin D. Preliminary study to establish a controlled method of assessing transcutaneous nerve stimulation as a treatment for the pain caused by  
28 osteoarthritis of the knee. *Physiotherapy* 1983; **69**: 266-8.
- 29 331. Smith C, Guralnick M, Gelfand M, Jeans M. The effects of transcutaneous electrical nerve stimulation on post-cesarean pain. *Pain* 1986; **27**(2): 181-93.
- 30 332. Sodipo JO, Adedeji SA, Olumide O. Postoperative pain relief by transcutaneous electrical nerve stimulation (TENS). *The American journal of Chinese medicine*  
31 1980; **8**(1-2): 190-4.
- 32 333. Solak O, Turna A, Pekcolaklar A, Metin M, Sayar A, Gurses A. Transcutaneous electric nerve stimulation for the treatment of postthoracotomy pain: a randomized  
33 prospective study. *The Thoracic and cardiovascular surgeon* 2007; **55**(3): 182-5.
- 34 334. Solak O, Emmiler M, Ela Y, et al. Comparison of continuous and intermittent transcutaneous electrical nerve stimulation in postoperative pain management after  
35 coronary artery bypass grafting: A randomized, placebo-controlled prospective study. *Heart Surgery Forum* 2009; **12**(5): E266-E71.
- 36 335. Sonde L, Gip C, Fernaes SE, Nilsson CG, Viitanen M. Stimulation with low frequency (1.7 Hz) transcutaneous electric nerve stimulation (low-tens) increases  
37 motor function of the post-stroke paretic arm. *Scandinavian journal of rehabilitation medicine* 1998; **30**(2): 95-9.
- 38 336. Stepanovic A, Kolsek M, Kersnik J, Erculj V. Prevention of post-herpetic neuralgia using transcutaneous electrical nerve stimulation. *Wiener klinische  
39 Wochenschrift* 2015; **127**(9-10): 369-74.
- 40 337. Steptoe P, Bo JO. Pain-relieving effect of transcutaneous nerve stimulation during delivery. A study among primiparas. *Ugeskrift for laeger* 1984; **146**(42): 3186-8.
- 41 338. Stratton S, Smith M. Postoperative thoracotomy. Effect of transcutaneous electrical nerve stimulation on forced vital capacity. *Physical therapy* 1980; **60**(1): 45-7.
- 42  
43  
44  
45  
46

- 1  
2  
3 339. Stubbing JF, Jellicoe JA. Transcutaneous electrical nerve stimulation after thoracotomy. Pain relief and peak expiratory flow rate--a trial of transcutaneous electrical  
4 nerve stimulation. *Anaesthesia* 1988; **43**(4): 296-8.
- 5 340. Suh HR, Kim TH, Han GS. The Effects of High-Frequency Transcutaneous Electrical Nerve Stimulation for Dental Professionals with Work-Related  
6 Musculoskeletal Disorders: A Single-Blind Randomized Placebo-Controlled Trial. *Evidence-Based Complementary and Alternative Medicine* 2015.
- 7 341. Talbot LA, Solomon Z, Webb L, Morrell C, Metter EJ. Electrical Stimulation Therapies for Active Duty Military with Patellofemoral Pain Syndrome: A  
8 Randomized Trial. *Military medicine* 2020.
- 9 342. Tantawy SA, Kamel DM, Abdelbasset WK. Does transcutaneous electrical nerve stimulation reduce pain and improve quality of life in patients with idiopathic  
10 chronic orchialgia? A randomized controlled trial. *Journal of Pain Research* 2018; **11**: 77-82.
- 11 343. Taylor P, Hallett M, Flaherty L. Treatment of osteoarthritis of the knee with transcutaneous electrical nerve stimulation. *Pain* 1981; **11**(2): 233-40.
- 12 344. Taylor A, West B, Simon B, Skelton J, Rowlingson J. How effective is TENS for acute pain? *Am J Nurs* 1983; **83**(8): 1171-4.
- 13 345. Thakur R, Patidar RJJOGI. Comparative study of transcutaneous electrical nerve stimulation (TENS) and tramadol hydrochloride for pain relief in labor. 2004;  
14 **54**(4): 346-50.
- 15 346. Thomas IL, Tyle V, Webster J, Neilson A. An evaluation of transcutaneous electrical nerve stimulation for pain relief in labour. *The Australian & New Zealand*  
16 *journal of obstetrics & gynaecology* 1988; **28**(3): 182-9.
- 17 347. Thomas M, Lundeberg T, Bjork G, Lundstrom-Lindstedt V. Pain and discomfort in primary dysmenorrhea is reduced by preemptive acupuncture or low frequency  
18 TENS. *European Journal of Physical Medicine and Rehabilitation* 1995; **5**(3): 71-6.
- 19 348. Thorsteinsson G, Stonnington HH, Stillwell GK, Elveback LR. The placebo effect of transcutaneous electrical stimulation. *Pain* 1978; **5**(1): 31-41.
- 20 349. Tilak M, Isaac SA, Fletcher J, et al. Mirror Therapy and Transcutaneous Electrical Nerve Stimulation for Management of Phantom Limb Pain in Amputees - A  
21 Single Blinded Randomized Controlled Trial. *Physiotherapy research international : the journal for researchers and clinicians in physical therapy* 2016; **21**(2): 109-15.
- 22 350. Tokuda M, Tabira K, Masuda T, Nishiwada T, Shomoto K. Effect of modulated-frequency and modulated-intensity transcutaneous electrical nerve stimulation after  
23 abdominal surgery: a randomized controlled trial. *The Clinical journal of pain* 2014; **30**(7): 565-70.
- 24 351. Tonella RM, Araujo S, Da Silva AMO. Transcutaneous electrical nerve stimulation in the relief of pain related to physical therapy after abdominal surgery.  
25 [Portuguese, English]. *Revista brasileira de anestesiologia* 2006; **56**(6): 630-42.
- 26 352. Topuz O, Ozfidan E, Ozgen M, Ardic F. Efficacy of transcutaneous electrical nerve stimulation and percutaneous neuromodulation therapy in chronic low back pain.  
27 *Journal of back and musculoskeletal rehabilitation* 2004; **17**(3-4): 127-33.
- 28 353. Tosato J, Biasotto-Gonzalez D, Caria PJFP. Effect of massage therapy and of transcutaneous electrical nerve stimulation on pain and electromyographic activity in  
29 patients with temporomandibular dysfunction. 2007; **14**: 21-6.
- 30 354. Treacy K. Awareness/relaxation training and transcutaneous electrical neural stimulation in the treatment of bruxism. *Journal of oral rehabilitation* 1999; **26**(4):  
31 280-7.
- 32 355. Tsen LC, Thomas J, Segal S, Datta S, Bader AM. Transcutaneous electrical nerve stimulation does not augment combined spinal epidural labour analgesia.  
33 *Canadian journal of anaesthesia = Journal canadien d'anesthesie* 2000; **47**(1): 38-42.
- 34 356. Tsen LC, Thomas J, Segal S, Datta S, Bader AM. Transcutaneous electrical nerve stimulation does not augment epidural labor analgesia. *Journal of clinical*  
35 *anesthesia* 2001; **13**(8): 571-5.
- 36 357. Tsukayama H, Yamashita H, Amagai H, Tanno Y. Randomised controlled trial comparing the effectiveness of electroacupuncture and TENS for low back pain: a  
37 preliminary study for a pragmatic trial. *Acupuncture in medicine : journal of the British Medical Acupuncture Society* 2002; **20**(4): 175-80.
- 38 358. Tucker DL, Rockett M, Hasan M, Poplar S, Rule SA. Does transcutaneous electrical nerve stimulation (TENS) alleviate the pain experienced during bone marrow  
39 sampling in addition to standard techniques? A randomised, double-blinded, controlled trial. *Journal of clinical pathology* 2015; **68**(6): 479-83.
- 40 359. Tugay N, Akbayrak T, Demirturk F, et al. Effectiveness of transcutaneous electrical nerve stimulation and interferential current in primary dysmenorrhea. *Pain*  
41 *medicine (Malden, Mass)* 2007; **8**(4): 295-300.
- 42  
43  
44  
45  
46

- 1  
2  
3 360. Tulgar M, McGlone F, Bowsher D, Miles JB. Comparative effectiveness of different stimulation modes in relieving pain. Part I. A pilot study. *Pain* 1991; **47**(2):  
4 151-5.
- 5 361. Tulgar M, McGlone F, Bowsher D, Miles JB. Comparative effectiveness of different stimulation modes in relieving pain. Part II. A double-blind controlled long-  
6 term clinical trial. *Pain* 1991; **47**(2): 157-62.
- 7 362. Unterrainer AF, Friedrich C, Krenn MH, Piotrowski WP, Golaszewski SM, Hitzl W. Postoperative and preincisional electrical nerve stimulation TENS reduce  
8 postoperative opioid requirement after major spinal surgery. *Journal of neurosurgical anesthesiology* 2010; **22**(1): 1-5.
- 9 363. Unterrainer AF, Uebleis FX, Gross FA, Werner GG, Krombholz MA, Hitzl W. TENS compared to opioids in postoperative analgesic therapy after major spinal  
10 surgery with regard to cognitive function. *Middle east journal of anaesthesiology* 2012; **21**(6): 815-21.
- 11 364. Upton GA, Tinley P, Al-Aubaidy H, Crawford R. The influence of transcutaneous electrical nerve stimulation parameters on the level of pain perceived by  
12 participants with painful diabetic neuropathy: A crossover study. *Diabetes & metabolic syndrome* 2017; **11**(2): 113-8.
- 13 365. Vaidya SM. Sacroiliac joint mobilisation versus transcutaneous electrical nerve stimulation for pregnancy induced posterior pelvic pain-a randomised clinical trial.  
14 *Journal of Clinical and Diagnostic Research* 2018; **12**(1): YC04-YC7.
- 15 366. Vaillancourt S, Coulombe-Lévêque A, Fradette J, et al. Combining transcutaneous electrical nerve stimulation with therapeutic exercise to reduce pain in an elderly  
16 population: a pilot study. *Disability and rehabilitation* 2019: 1-8.
- 17 367. Valenza MC, Torres-Sanchez I, Cabrera-Martos I, Valenza-Demet G, Cano-Cappellacci M. Acute Effects of Contract-Relax Stretching vs. TENS in Young Subjects  
18 With Anterior Knee Pain: A Randomized Controlled Trial. *Journal of strength and conditioning research* 2016; **30**(8): 2271-8.
- 19 368. van der Ploeg JM, Vervest HA, Liem AL, Schagen van Leeuwen JH. Transcutaneous nerve stimulation (TENS) during the first stage of labour: a randomized  
20 clinical trial. *Pain* 1996; **68**(1): 75-8.
- 21 369. van der Spank JT, Cambier DC, De\_Paeppe HM, Danneels LA, Witvrouw EE, Beerens L. Pain relief in labour by transcutaneous electrical nerve stimulation (TENS).  
22 *Archives of gynecology and obstetrics* 2000; **264**(3): 131-6.
- 23 370. Vance CG, Rakel BA, Blodgett NP, et al. Effects of transcutaneous electrical nerve stimulation on pain, pain sensitivity, and function in people with knee  
24 osteoarthritis: a randomized controlled trial. *Physical therapy* 2012; **92**(7): 898-910.
- 25 371. Vitalii C, Oleg P. The efficiency of transcutaneous electrical nerve stimulation in association with gabapentin in the treatment of neuropathic pain in patients with  
26 spinal cord injury. *Romanian Journal of Neurology/ Revista Romana de Neurologie* 2014; **13**(4): 193-6.
- 27 372. Vrouva S, Batistaki C, Paraskevaidou E, et al. Comparative study of pain relief in two non-pharmacological treatments in patients with partial rotator cuff tears: A  
28 randomized trial. *Anesthesiology and Pain Medicine* 2019; **9**(2).
- 29 373. Walker RH, Morris BA, Angulo DL, Schneider J, Colwell CW, Jr. Postoperative use of continuous passive motion, transcutaneous electrical nerve stimulation, and  
30 continuous cooling pad following total knee arthroplasty. *The Journal of arthroplasty* 1991; **6**(2): 151-6.
- 31 374. Wang SF, Lee JP, Hwa HL. Effect of transcutaneous electrical nerve stimulation on primary dysmenorrhea. *Neuromodulation : journal of the International  
32 Neuromodulation Society* 2009; **12**(4): 302-9.
- 33 375. Warfield CA, Stein JM, Frank HA. The effect of transcutaneous electrical nerve stimulation on pain after thoracotomy. *The Annals of thoracic surgery* 1985; **39**(5):  
34 462-5.
- 35 376. Warke K, Al-Smadi J, Baxter GD, Walsh DM, Lowe-Strong AS. A double blind, placebo controlled, randomised, clinical trial investigating the efficacy of  
36 transcutaneous electrical nerve stimulation for low back pain in a multiple sclerosis population. *Multiple Sclerosis* 2004; **10**(7032): S107-S.
- 37 377. Warke K, Al-Smadi J, Baxter D, Walsh D, Lowe-Strong A. Efficacy of transcutaneous electrical nerve stimulation (tens) for chronic low-back pain in a multiple  
38 sclerosis population: a randomized, placebo-controlled clinical trial. *Clinical Journal of Pain* 2006; **22**(9): 812-9.
- 39 378. Yameen F, Shahbaz NN, Hasan Y, Fauz R, Abdullah M. Efficacy of transcutaneous electrical nerve stimulation and its different modes in patients with trigeminal  
40 neuralgia. *JPMA The Journal of the Pakistan Medical Association* 2011; **61**(5): 437-9.
- 41  
42  
43  
44  
45  
46

- 1  
2  
3 379. Yesil H, Hepguler S, Dundar U, Taravati S, Isleten B. Does the Use of Electrotherapies Increase the Effectiveness of Neck Stabilization Exercises for Improving  
4 Pain, Disability, Mood, and Quality of Life in Chronic Neck Pain?: A Randomized, Controlled, Single-Blind Study. *Spine* 2018; **43**(20): E1174-e83.
- 5 380. Yilmaz M, Tarakci D, Tarakci E. Comparison of high-intensity laser therapy and combination of ultrasound treatment and transcutaneous nerve stimulation on  
6 cervical pain associated with cervical disc herniation: A randomized trial. *Complementary therapies in medicine* 2020; **49**: 102295.
- 7 381. Yilmazer M, Kose S, Arioz DT, Koken G, Ozbulut O. Efficacy of transcutaneous electrical nerve stimulation for pain relief in women undergoing office endometrial  
8 biopsy. *Archives of gynecology and obstetrics* 2012; **285**(4): 1059-64.
- 9 382. Yokoyama M, Sun X, Oku S, et al. Comparison of percutaneous electrical nerve stimulation with transcutaneous electrical nerve stimulation for long-term pain  
10 relief in patients with chronic low back pain. *Anesthesia and analgesia* 2004; **98**(6): 1552-6, table of contents.
- 11 383. Yoshimizu M, Teo AR, Ando M, Kiyohara K, Kawamura T. Relief of chronic shoulder and neck pain by electro-acupuncture and transcutaneous electrical nervous  
12 stimulation: A randomized crossover trial. *Medical Acupuncture* 2012; **24**(2): 97-103.
- 13 384. Yüksel M, Ayaş Ş, Cabioglu MT, Yilmaz D, Cabioglu C. Quantitative Data for Transcutaneous Electrical Nerve Stimulation and Acupuncture Effectiveness in  
14 Treatment of Fibromyalgia Syndrome. *Evidence-based Complementary and Alternative Medicine* 2019; **2019**.
- 15 385. Yurtkuran M, Kocagil T. TENS, electroacupuncture and ice massage: comparison of treatment for osteoarthritis of the knee. *American journal of acupuncture* 1999;  
16 **27**(3-4): 133-40.
- 17 386. Zakariaee SS, Shahoei R, Nosab LH, Moradi G, Farshbaf M. The Effects of Transcutaneous Electrical Nerve Stimulation on Post-Episiotomy Pain Severity in  
18 Primiparous Women: A Randomized, Controlled, Placebo Clinical Trial. *Galen Medical Journal* 2019; **8**: UNSP e1404.
- 19 387. Zhang Y, Zhang J, Wang L, Wang K, Svensson P. Effect of transcutaneous electrical nerve stimulation on jaw movement-evoked pain in patients with TMJ disc  
20 displacement without reduction and healthy controls. *Acta Odontologica Scandinavica* 2020; **78**(4): 309-20.
- 21 388. Zhou MM, Li F, Lu WB, Wu JF, Pei S. Efficiency of Neuromuscular Electrical Stimulation and Transcutaneous Nerve Stimulation on Hemiplegic Shoulder Pain: A  
22 Randomized Controlled Trial. *Archives of physical medicine and rehabilitation* 2018; **99**(9): 1730-9.
- 23  
24  
25  
26  
27  
28  
29  
30  
31  
32  
33  
34  
35  
36  
37  
38  
39  
40  
41  
42  
43  
44  
45  
46



# PRISMA 2009 Checklist

| Section/topic                      | #  | Checklist item                                                                                                                                                                                                                                                                                              | Reported on page # |
|------------------------------------|----|-------------------------------------------------------------------------------------------------------------------------------------------------------------------------------------------------------------------------------------------------------------------------------------------------------------|--------------------|
| <b>TITLE</b>                       |    |                                                                                                                                                                                                                                                                                                             |                    |
| Title                              | 1  | Identify the report as a systematic review, meta-analysis, or both.                                                                                                                                                                                                                                         | 1                  |
| <b>ABSTRACT</b>                    |    |                                                                                                                                                                                                                                                                                                             |                    |
| Structured summary                 | 2  | Provide a structured summary including, as applicable: background; objectives; data sources; study eligibility criteria, participants, and interventions; study appraisal and synthesis methods; results; limitations; conclusions and implications of key findings; systematic review registration number. | 2                  |
| <b>INTRODUCTION</b>                |    |                                                                                                                                                                                                                                                                                                             |                    |
| Rationale                          | 3  | Describe the rationale for the review in the context of what is already known.                                                                                                                                                                                                                              | 4-5                |
| Objectives                         | 4  | Provide an explicit statement of questions being addressed with reference to participants, interventions, comparisons, outcomes, and study design (PICOS).                                                                                                                                                  | 4-5                |
| <b>METHODS</b>                     |    |                                                                                                                                                                                                                                                                                                             |                    |
| Protocol and registration          | 5  | Indicate if a review protocol exists, if and where it can be accessed (e.g., Web address), and, if available, provide registration information including registration number.                                                                                                                               | 5                  |
| Eligibility criteria               | 6  | Specify study characteristics (e.g., PICOS, length of follow-up) and report characteristics (e.g., years considered, language, publication status) used as criteria for eligibility, giving rationale.                                                                                                      | 5                  |
| Information sources                | 7  | Describe all information sources (e.g., databases with dates of coverage, contact with study authors to identify additional studies) in the search and date last searched.                                                                                                                                  | 5                  |
| Search                             | 8  | Present full electronic search strategy for at least one database, including any limits used, such that it could be repeated.                                                                                                                                                                               | 5                  |
| Study selection                    | 9  | State the process for selecting studies (i.e., screening, eligibility, included in systematic review, and, if applicable, included in the meta-analysis).                                                                                                                                                   | 5-7                |
| Data collection process            | 10 | Describe method of data extraction from reports (e.g., piloted forms, independently, in duplicate) and any processes for obtaining and confirming data from investigators.                                                                                                                                  | 5-7                |
| Data items                         | 11 | List and define all variables for which data were sought (e.g., PICOS, funding sources) and any assumptions and simplifications made.                                                                                                                                                                       | 8-9                |
| Risk of bias in individual studies | 12 | Describe methods used for assessing risk of bias of individual studies (including specification of whether this was done at the study or outcome level), and how this information is to be used in any data synthesis.                                                                                      | 8-9                |
| Summary measures                   | 13 | State the principal summary measures (e.g., risk ratio, difference in means).                                                                                                                                                                                                                               | 6-7                |
| Synthesis of results               | 14 | Describe the methods of handling data and combining results of studies, if done, including measures of consistency (e.g., I <sup>2</sup> ) for each meta-analysis.                                                                                                                                          | 8-9                |



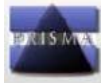

# PRISMA 2009 Checklist

Page 1 of 2

| Section/topic                 | #  | Checklist item                                                                                                                                                                                           | Reported on page # |
|-------------------------------|----|----------------------------------------------------------------------------------------------------------------------------------------------------------------------------------------------------------|--------------------|
| Risk of bias across studies   | 15 | Specify any assessment of risk of bias that may affect the cumulative evidence (e.g., publication bias, selective reporting within studies).                                                             | 8-9                |
| Additional analyses           | 16 | Describe methods of additional analyses (e.g., sensitivity or subgroup analyses, meta-regression), if done, indicating which were pre-specified.                                                         | 8-9                |
| <b>RESULTS</b>                |    |                                                                                                                                                                                                          |                    |
| Study selection               | 17 | Give numbers of studies screened, assessed for eligibility, and included in the review, with reasons for exclusions at each stage, ideally with a flow diagram.                                          | 9-10               |
| Study characteristics         | 18 | For each study, present characteristics for which data were extracted (e.g., study size, PICOS, follow-up period) and provide the citations.                                                             | 9-10               |
| Risk of bias within studies   | 19 | Present data on risk of bias of each study and, if available, any outcome level assessment (see item 12).                                                                                                | 9-10               |
| Results of individual studies | 20 | For all outcomes considered (benefits or harms), present, for each study: (a) simple summary data for each intervention group (b) effect estimates and confidence intervals, ideally with a forest plot. | 10-13              |
| Synthesis of results          | 21 | Present results of each meta-analysis done, including confidence intervals and measures of consistency.                                                                                                  | 10-13              |
| Risk of bias across studies   | 22 | Present results of any assessment of risk of bias across studies (see Item 15).                                                                                                                          | 9-10               |
| Additional analysis           | 23 | Give results of additional analyses, if done (e.g., sensitivity or subgroup analyses, meta-regression [see Item 16]).                                                                                    | 10-13              |
| <b>DISCUSSION</b>             |    |                                                                                                                                                                                                          |                    |
| Summary of evidence           | 24 | Summarize the main findings including the strength of evidence for each main outcome; consider their relevance to key groups (e.g., healthcare providers, users, and policy makers).                     | 13-15              |
| Limitations                   | 25 | Discuss limitations at study and outcome level (e.g., risk of bias), and at review-level (e.g., incomplete retrieval of identified research, reporting bias).                                            | 15-16              |
| Conclusions                   | 26 | Provide a general interpretation of the results in the context of other evidence, and implications for future research.                                                                                  | 17-19              |
| <b>FUNDING</b>                |    |                                                                                                                                                                                                          |                    |
| Funding                       | 27 | Describe sources of funding for the systematic review and other support (e.g., supply of data); role of funders for the systematic review.                                                               | 20-21              |

From: Moher D, Liberati A, Tetzlaff J, Altman DG, The PRISMA Group (2009). Preferred Reporting Items for Systematic Reviews and Meta-Analyses: The PRISMA Statement. PLoS Med 6(7): e1000097. doi:10.1371/journal.pmed1000097

For more information, visit: [www.prisma-statement.org](http://www.prisma-statement.org).

Page 2 of 2

For peer review only - <http://bmjopen.bmj.com/site/about/guidelines.xhtml>
