# Supplementary material for: Efficacy and safety of transcutaneous electrical nerve stimulation (TENS) for acute and chronic pain in adults: a systematic review and meta-analysis of 381 studies (the meta-TENS study)
Source: PubMed Central journal article supplement — BMJ Open. 2022 Feb 10;12(2):e051073. doi: 10.1136/bmjopen-2021-051073 (PMC8845179; doi:10.1136/bmjopen-2021-051073), 2022-02-10
Supplement: bmjopen-2021-051073supp002.pdf [file bmjopen-2021-051073supp002.pdf]

08\_OL-TABLE1\_IncludedStudies

## ONLINE TABLE 1

## Summary Characteristics of included RCTs

| Reference                                 | Design | Type | Condition                           | Sample size (women) | Primary TENS comparison                             | Comparison interventions                                                                                | TENS regimen                                         | Primary Outcome                                                      | Secondary Outcome                                           |
|-------------------------------------------|--------|------|-------------------------------------|---------------------|-----------------------------------------------------|---------------------------------------------------------------------------------------------------------|------------------------------------------------------|----------------------------------------------------------------------|-------------------------------------------------------------|
| Abbasi et al., 2019 <sup>1</sup>          | P      | Pr   | Procedural - Throughout Pleurodesis | 66 (NR)             | TENS (HF) + Diclofenac = 33                         | Placebo TENS (0mA) + diclofenac = 33                                                                    | Fixed<br>1 x 50 mins during procedure                | Pain intensity (VAS)                                                 | Analgesic consumption<br>Blood pressure, heart rate         |
| Abelson et al., 1983 <sup>2</sup>         | P      | Pr   | Rheumatoid arthritis                | 32 (26W)            | TENS (HF) = 13                                      | Placebo TENS = 13 (0mA)                                                                                 | Fixed<br>1 x 15 mins / week x 3 weeks<br>3 sessions  | Pain intensity (VAS)<br>Resting pain<br>Pain on movement (grip task) | Grip strength                                               |
| Abreu et al., 2010 <sup>3</sup>           | P      | Pr   | Labour pain                         | 20 (20W)            | TENS (HF) = 10                                      | Placebo TENS = 10 (mA barely perceptible)                                                               | PRN during labour - first stage                      | Pain intensity (VAS)                                                 | Time to analgesia<br>Duration of analgesia                  |
| Acedo et al., 2015 <sup>4</sup>           | P      | Pr   | Neck pain - chronic non-specific    | 64 (64W)            | TENS (LF, burst, - 100pps) = 32                     | IFT = 32                                                                                                | Fixed<br>30 mins / day on days 2, 3, 5<br>3 sessions | Pain intensity (VAS)                                                 | Muscle relaxation (EMG microV)                              |
| Adedoyin et al., 2005 <sup>5</sup>        | P      | Pr   | Osteoarthritis - knee               | 46 (28W)            | TENS (HF) + Exercise = 15                           | IFT + Exercise = 16<br>Exercise alone (SoC, no TENS) = 15                                               | Fixed<br>2 x 20min / week x 4 weeks<br>8 sessions    | Pain intensity (NRS)                                                 | WOMAC                                                       |
| Ahmed, 2010 <sup>6</sup>                  | P      | Pr   | Post-op – inguinal hernia repair    | 60 (0W)             | TENS (HF) + paracetamol + diclofenac as needed = 30 | Placebo TENS (0mA) + paracetamol + diclofenac as needed = 30                                            | Fixed<br>2 x 30 mins / day x 5 days<br>10 sessions   | Pain intensity (VAS)                                                 | Analgesic consumption<br>Assessment of serum cortisol level |
| Ahmed et al., 2020 <sup>7</sup>           | P      | Pr   | Diabetic neuropathic pain           | 30 (19W)            | TENS (LF, AL-TENS) + aerobic exercise = 15          | Repetitive transcranial magnetic stimulation (rTMS) + aerobic exercise = 15                             | Fixed<br>1 x 20 mins / day x 5 days<br>10 sessions   | Pain intensity (VAS)                                                 | Blood β-endorphin level                                     |
| Alcidi et al., 2007 <sup>8</sup>          | P      | Pr   | Osteoarthritis - knee - acute       | 40 (35W)            | TENS (HF) = 20                                      | Electromagnetic radiation = 20                                                                          | Fixed<br>1 x 20 mins /day x 5 days<br>5 sessions     | Pain intensity (VAS)                                                 | Lequesne's index for knee OA                                |
| Ali et al., 1981 <sup>9</sup>             | P      | Pr   | Post-op – abdominal                 | 40 (24W)            | TENS (HF) + Demerol = 15                            | Placebo TENS (0mA) + Demerol = 10<br>Demerol + No TENS (SoC, no TENS) = 15                              | PRN<br>48h Post-operation                            | No primary outcome                                                   | Analgesic consumption<br>Vc FRc arterial PO2                |
| Alizade and Ahmadizad, 2009 <sup>10</sup> | P      | Pr   | Back pain – low, chronic            | 24 (24W)            | TENS (HF) + NSAIDs (ibuprofen and diclofenac) = 8   | NSAIDs (ibuprofen and diclofenac) + exercise = 8<br>NSAIDs (ibuprofen and diclofenac, SoC, no TENS) = 8 | Fixed<br>30 mins / day x 3 days / week x 5 weeks     | No primary outcome                                                   | Modified Oswestry low back pain disability questionnaire    |

O8\_OL-TABLE1\_IncludedStudies

|                                               |   |    |                                                               |             |                                                                                                               |                                                                                                                                                                            |                                                                                     |                                                     |                                                                                                                                                                                                         |
|-----------------------------------------------|---|----|---------------------------------------------------------------|-------------|---------------------------------------------------------------------------------------------------------------|----------------------------------------------------------------------------------------------------------------------------------------------------------------------------|-------------------------------------------------------------------------------------|-----------------------------------------------------|---------------------------------------------------------------------------------------------------------------------------------------------------------------------------------------------------------|
| Allais et al., 2003 <sup>11</sup>             | P | Pr | Migraine - transformed                                        | 60 (60W)    | TENS (HF, MF, LF) = 20                                                                                        | Infrared laser therapy = 20<br>Acupuncture = 20                                                                                                                            | 15 sessions<br>Fixed<br>30 mins / day x 5<br>day / week x 2<br>weeks<br>10 sessions | No primary<br>outcome                               | Number of days with headache<br>per month                                                                                                                                                               |
| Alm et al., 1979 <sup>12</sup>                | P | E  | Post-op – podiatric<br>surgery                                |             | TENS (HF) = 50                                                                                                | Placebo TENS (0mA) =25<br>Control Group (patient records) =<br>25                                                                                                          | PRN<br>Mean duration 20-40<br>mins / treatment<br>repeated                          | Pain relief (4-<br>point category<br>scale)         | Analgesic consumption                                                                                                                                                                                   |
| Al-Smadi et al., 2003 <sup>13</sup>           | P | Pr | Back pain –<br>low, multiple sclerosis                        | 15 (n/r)    | TENS (HF) = 5<br>(110 Hz, 200 ms)                                                                             | Placebo TENS = 5<br>(0mA)<br>TENS (LF) = 5<br>(4Hz, 200 ms)                                                                                                                | Fixed<br>1 x 45min / day x 3<br>days / week x 6<br>weeks<br>18 sessions             | Pain intensity<br>(VAS)                             | McGill Pain Questionnaire<br>Roland Morris Disability<br>Questionnaire<br>Leeds MS Specific Quality of<br>Life Questionnaire                                                                            |
| Altay et al., 2010 <sup>14</sup>              | P | Pr | Osteoarthritis - knee                                         | 40 (30W)    | TENS (HF) = 20                                                                                                | Placebo TENS = 20<br>(0mA)                                                                                                                                                 | Fixed<br>1 x 40 min / day x 3<br>weeks 21 sessions                                  | Pain intensity<br>(VAS)                             | WOMAC<br>Beck Depression<br>Inventory<br>Short Form 36<br>10 steps stairs climbing up-down<br>time<br>6-minute walk distance                                                                            |
| Alvarez-Arenal et al.,<br>2002 <sup>15</sup>  | C | E  | Temporomandibular<br>disorder – bruxism                       | 24 (9W)     | TENS (LF) = 24                                                                                                | Splint = 24                                                                                                                                                                | Fixed<br>1 x 45-60 mins every<br>2 days<br>15 sessions                              | Pain intensity on<br>palpation (4-point<br>scale)   | Tenderness on palpation (4-point<br>scale)<br>Severity of TMD (pantographic<br>reproducibility<br>index -PRI)<br>Joint noises associated<br>with oral opening and closing<br>(number of 'click' noises) |
| Alves Silverio et al.,<br>2015 <sup>16</sup>  | P | Pr | Dysphonic –<br>Muscle tension                                 | 20 (20W)    | TENS (LF) = 10                                                                                                | Laryngeal manual therapy = 10                                                                                                                                              | Fixed<br>2 x 20mins / week x<br>6 weeks<br>12 sessions                              | Pain intensity<br>(VAS)                             | Nordic musculoskeletal symptoms<br>questionnaire<br>Vocal quality - auditory<br>perceptual analysis of voice.                                                                                           |
| Amer-Cuenca et al.,<br>2011 <sup>17</sup>     | P | Pr | Procedural pain –<br>colonoscopy                              | 90<br>(50W) | TENS (RF) = 30                                                                                                | Placebo TENS = 30<br>(0mA)<br>No treatment (unseated) = 30                                                                                                                 | Fixed<br>During procedure                                                           | Pain intensity<br>(VAS and 5-point<br>Likert scale) | Unusual or adverse events                                                                                                                                                                               |
| AminiSaman et al.,<br>2020 <sup>18</sup>      | P | Pr | Procedural pain -<br>Needle insertion -<br>Spinal anaesthesia | 60 (25W)    | TENS (HF) = 30                                                                                                | Placebo TENS (0mA) = 30                                                                                                                                                    | Fixed<br>During needle<br>insertion procedure                                       | Pain intensity<br>(VAS)                             | Number of attempts to insert<br>needle<br>Duration insertion time                                                                                                                                       |
| Angulo and Colwell Jr,<br>1990 <sup>19</sup>  | P | Pr | Post-op –<br>knee replacement                                 | 48 (28W)    | TENS (sensory threshold) +<br>continuous passive motion +<br>opioids as needed (SoC, No<br>TENS control) = 18 | Placebo TENS (active <SDT) +<br>continuous passive motion +<br>opioids as needed = 18<br>No TENS + continuous passive<br>motion + opioids as needed (SoC,<br>no TENS) = 12 | PRN<br>20 hours / day x 3<br>days                                                   | Pain intensity<br>(VAS)                             | Analgesic consumption (Narcotic)<br>Knee flexion range of motion                                                                                                                                        |
| Ardic et al., 2002 <sup>20</sup>              | P | Pr | Myofascial pain                                               | 40 (36W)    | TENS (HF) + Exercise = 15                                                                                     | Exercises (SoC, no TENS) = 10<br>Electrical muscle stimulation +<br>Exercises = 15                                                                                         | Fixed<br>1 x 20mins / day x 2<br>weeks<br>14 sessions                               | Pain intensity<br>(VAS)                             | Pain threshold on palpation<br>Range of motion                                                                                                                                                          |
| Arvidsson and Eriksson,<br>1986 <sup>21</sup> | C | E  | Post-op –                                                     | 15(3W)      | TENS (HF) = 15                                                                                                | Placebo TENS = 15<br>(0mA)                                                                                                                                                 | Fixed<br>1 x 15-20 mins                                                             | Pain intensity (0-<br>20 Borg scale)                | Quadriceps contraction ability<br>(EMG)                                                                                                                                                                 |

O8\_OL-TABLE1\_IncludedStudies

|                                         |   |    |                                                            |            |                                                                                     |                                                                                                                                                                                                                                            |                                                                                       |                                                           |                                                                                                                                                           |
|-----------------------------------------|---|----|------------------------------------------------------------|------------|-------------------------------------------------------------------------------------|--------------------------------------------------------------------------------------------------------------------------------------------------------------------------------------------------------------------------------------------|---------------------------------------------------------------------------------------|-----------------------------------------------------------|-----------------------------------------------------------------------------------------------------------------------------------------------------------|
|                                         |   |    | knee ACL reconstruction                                    |            |                                                                                     | Epidural injection (lidocaine 2.5ug/ml) = 15                                                                                                                                                                                               | 1 session                                                                             | Resting pain<br>Pain on movement (quadriceps contraction) |                                                                                                                                                           |
| Asgari et al., 2018 <sup>22</sup>       | P | Pr | Procedural pain – gynaecologic laparoscopy (shoulder pain) | 80 (80W)   | TENS (LF) = 40                                                                      | Fentanyl (SoC, no TENS) = 40                                                                                                                                                                                                               | Fixed<br>20 mins during procedure                                                     | Pain intensity (VAS)                                      | Analgesic consumption                                                                                                                                     |
| Atamaz et al., 2012 <sup>23</sup>       | P | Pr | Osteoarthritis - knee                                      | 203 (167W) | TENS (HF) + Exercise + Education = 37                                               | Placebo TENS + Exercise + Education = 37 (0mA)<br>IFT + Exercise + Education = 31<br>Placebo IFT + Exercise + Education = 35<br>Shortwave diathermy + Exercise + Education = 31<br>Placebo shortwave diathermy + Exercise + Education = 32 | Fixed<br>1 x 20 mins / day x 5 / week x 3 weeks<br>15 sessions                        | Pain intensity (VAS)                                      | Analgesic consumption (Paracetamol)<br>Pain free range of motion<br>Patient's satisfaction with the treatment (VAS)<br>WOMAC<br>Nottingham Health Profile |
| Aydin et al., 2005 <sup>24</sup>        | P | Pr | Spasticity – SCI, lower limb pain                          | 21 (15W)   | TENS (HF) + exercise (range of motion, every morning) = 11                          | Baclofen + exercise (range of motion, every morning) (SoC) = 10                                                                                                                                                                            | Fixed<br>1 x 15 min / day x 15 days<br>15 sessions                                    | Painful spasm scale (3-point scale)                       | Clinical assessment of spasticity - Self-reported and clinical examination<br>Electrophysiologic Assessment of Spasticity<br>H-reflex                     |
| Azatcam et al., 2017 <sup>25</sup>      | P | Pr | Myofascial pain                                            | 69 (38W)   | TENS (HF) + Exercise (Trapezius stretching) = 23                                    | Exercise (Trapezius stretching)(SoC, no TENS) = 23<br>Kinesiology taping + Exercise (Trapezius stretching) = 23                                                                                                                            | Fixed<br>1 x 20 mins / day x 5 days / week x 2 weeks<br>10 sessions                   | Pain intensity (VAS)                                      | Pain threshold (algometry)<br>Neck Disability Index<br>Cervical range of motion                                                                           |
| Bález-Suárez et al., 2018 <sup>26</sup> | P | Pr | Labour pain                                                | 63 (63W)   | TENS (HF) = 21                                                                      | Placebo TENS = 21 (0mA)<br>TENS (MF) = 21                                                                                                                                                                                                  | PRN<br>>30 mins / treatment during labour                                             | Pain intensity (VAS)                                      | Care in Obstetrics Measure for Testing Satisfaction (COMFORTS) scale                                                                                      |
| Bai et al., 2017 <sup>27</sup>          | P | Pr | Dysmenorrhea                                               | 134 (134W) | TENS (AF) + Ibuprofen as needed = 67                                                | Placebo TENS (0mA) + ibuprofen as needed) = 67 (0mA)                                                                                                                                                                                       | Fixed<br>1 x 30 mins / day x 3 days x 3 menstrual cycles<br>9 sessions                | Pain intensity (NRS)                                      | Analgesic consumption (Ibuprofen)<br>Pain relief duration<br>World Health Organization quality of life (WHOQOL)-BREF                                      |
| Baki et al., 2015 <sup>28</sup>         | P | Pr | Post-op – thoracotomy                                      | 40 (15W)   | TENS (HF) + tramadol PCA = 20                                                       | Paravertebral block+ tramadol PCA = 20                                                                                                                                                                                                     | PRN<br>24 h post op                                                                   | Pain intensity (VAS)<br>• Resting pain<br>• During cough  | Analgesic consumption (Tramadol)<br>Respiratory function<br>FEV1, FEV1/FVC, mean arterial pressure, heart rate, saturation of oxygen                      |
| Ballegaard et al., 1985 <sup>29</sup>   | C | E  | Pancreatitis – chronic                                     | 16(NR)     | TENS (HF, conventional followed by LF, acupuncture-like) + morphine on request = 11 | Placebo TENS (NR) + morphine on request = 11                                                                                                                                                                                               | Fixed<br>1 x 30 mins / day x 1 week<br>7 sessions<br>Repeated at each of 3 body sites | Pain intensity (VAS)                                      | Analgesic consumption (Morphine)<br>Treatment preference<br>Daily assessment of well-being (VAS)                                                          |

08\_OL-TABLE1\_IncludedStudies

|                                            |   |    |                                                   |          |                                                          |                                                                               |                                                                                   |                                                                                                  |                                                                                                                                                                                                                                                                                                                                                   |
|--------------------------------------------|---|----|---------------------------------------------------|----------|----------------------------------------------------------|-------------------------------------------------------------------------------|-----------------------------------------------------------------------------------|--------------------------------------------------------------------------------------------------|---------------------------------------------------------------------------------------------------------------------------------------------------------------------------------------------------------------------------------------------------------------------------------------------------------------------------------------------------|
| Barbarisi et al., 2010 <sup>30</sup>       | P | Pr | Post herpetic neuralgia                           | 30 (15W) | TENS (HF) + Pregabalin = 16                              | Placebo TENS + Pregabalin (0mA) = 14                                          | 21 sessions<br>Fixed<br>1 x 30 mins / day x 9 visits (over 4 weeks)<br>9 sessions | Pain intensity (VAS)                                                                             | SF-McGill Pain Questionnaire<br>Sleep interference                                                                                                                                                                                                                                                                                                |
| Barker et al., 2006 <sup>31</sup>          | P | Pr | Pelvic pain – acute, during transport to hospital | 62 (62W) | TENS (HF) = 29                                           | Placebo TENS (0mA) = 33                                                       | PRN<br>~ 30 mins during transportation to hospital<br>1 session                   | Pain intensity (VAS)                                                                             | Oscillometric blood pressure<br>Heart rate<br>Anxiety (VAS)<br>Signs of sympathetic Activity (vasoconstriction/dilation of arms)                                                                                                                                                                                                                  |
| Barker et al., 2008 <sup>32</sup>          | P | Pr | Back pain – low, chronic                          | 60 (30W) | TENS (HF) = 28                                           | Sensory discrimination training using FairMed device = 32                     | PRN<br>2 x 30 min / day x 3 weeks<br>21 sessions                                  | Pain intensity (VAS)<br>• present pain<br>• average pain over a week<br>• worst pain over a week | Oswestry Disability Index<br>Functional physical tests<br>• 5-minute walking distance<br>• 1-minute stair climb<br>• 1 minute standing up and sitting down from a chair<br>Health Anxiety and Depression Scale<br>Tampa Scale Kinesiophobia<br>Pain Coping Scale<br>Pain Self Efficacy Questionnaire<br>Patient Global Impression of Change scale |
| Başkurt et al., 2006 <sup>33</sup>         | P | E  | Shoulder impingement - stage I                    | 92 (60W) | TENS (HF) = 30                                           | Heat (39°, SoC no TENS) = 31<br>Heat + TENS = 31                              | Fixed<br>1 x 20 mins<br>1 session                                                 | Pain intensity (VAS)                                                                             | Pressure algometry (pressure pain threshold)                                                                                                                                                                                                                                                                                                      |
| Bayindir et al., 1991 <sup>34</sup>        | P | E  | Post-op – cardiac surgery                         | 89 (29W) | TENS (LF, burst) = 59                                    | Placebo TENS = 30 (0mA)                                                       | Fixed<br>1 x 180 mins                                                             | Pain intensity (VAS)                                                                             | None                                                                                                                                                                                                                                                                                                                                              |
| Beckwée et al., 2018 <sup>35</sup>         | P | Pr | Post-op – total knee arthroplasty                 | 53 (34W) | TENS (LF, burst) + analgesics + physiotherapy (SoC) = 25 | Placebo TENS + analgesics + physiotherapy (SoC) = 28 (0mA)                    | Fixed<br>1x 40 mins / day during passive mobilisation x 5 days<br>5 sessions      | Pain intensity (VAS)                                                                             | Analgesic consumption<br>• Daily opioid analgesia<br>• cumulative opioid analgesia<br>• Non-opioid analgesia<br>Range of motion - Knee flexion                                                                                                                                                                                                    |
| Benedetti et al., 1997 <sup>36</sup>       | P | E  | Post-op – thoracic                                | 324 (NR) | TENS (HF) = 103                                          | Placebo TENS (0mA) = 106<br>Conventional drugs (SoC, no TENS) = 115 (Control) | Fixed<br>2 x 60 mins in recovery room first 12 h only<br>2 sessions               | Pain intensity (NRS)                                                                             | Analgesic consumption<br>Time to request further analgesia.                                                                                                                                                                                                                                                                                       |
| Bennett et al., 2010 <sup>37</sup>         | C | E  | Cancer bone pain                                  | 24 (6W)  | TENS (HF) = 24                                           | Placebo TENS = 24 (0mA)                                                       | Fixed<br>1 x 60 mins<br>1 session                                                 | Pain intensity (NRS and VRS 4 categories)<br>• Resting pain<br>• Pain on movement                | SF-McGill Pain Questionnaire<br>Satisfaction questionnaire                                                                                                                                                                                                                                                                                        |
| Bergeron-Vezina et al., 2018 <sup>38</sup> | C | E  | Back pain – chronic, low, non-specific            | 21 (11W) | TENS (HF) = 21 (maintaining pulse amplitude)             | TENS (HF) = 21 (pulse amplitude fading)                                       | Fixed<br>1 x 25 mins<br>1 session                                                 | Pain intensity (VAS)                                                                             | Pain unpleasantness (VAS)<br>Patient's Global Impression of Change scale                                                                                                                                                                                                                                                                          |

O8\_OL-TABLE1\_IncludedStudies

|                                          |   |    |                                                    |            |                                                            |                                                                                                                                                                                              |                                                              |                                                                                       |                                                                                                                                                                                                                                                   |
|------------------------------------------|---|----|----------------------------------------------------|------------|------------------------------------------------------------|----------------------------------------------------------------------------------------------------------------------------------------------------------------------------------------------|--------------------------------------------------------------|---------------------------------------------------------------------------------------|---------------------------------------------------------------------------------------------------------------------------------------------------------------------------------------------------------------------------------------------------|
| Bertalanffy et al., 2005 <sup>39</sup>   | P | Pr | Back pain - acute, low, during emergency transport | 74 (30W)   | TENS (HF) = 35                                             | Placebo TENS = 36 (0mA)                                                                                                                                                                      | Fixed<br>1 x ~30 mins during transportation<br>1 session     | Pain intensity (VAS)                                                                  | Anxiety (VAS)<br>Oscillometric blood pressure<br>Heart rate                                                                                                                                                                                       |
| Bi et al., 2015 <sup>40</sup>            | P | Pr | Spinal cord injury                                 | 52 (16W)   | TENS (LF) = 26                                             | Placebo TENS = 26 (0mA)                                                                                                                                                                      | Fixed<br>1 x 20mins/day x 3 / week x 12 weeks<br>36 sessions | Pain intensity (VAS)                                                                  | McGill Pain Questionnaire                                                                                                                                                                                                                         |
| Bilgili et al., 2016 <sup>41</sup>       | P | Pr | Complex regional pain syndrome                     | 30 (16W)   | TENS (HF) + contrast bath + whirlpool bath + exercise = 15 | Placebo TENS (0mA) + contrast bath + whirlpool bath + exercise = 15                                                                                                                          | Fixed<br>1 x 20 mins / day x 15 days<br>15 sessions          | Pain intensity (VAS) at rest                                                          | LANSS<br>Douleur Neuropathique en 4 Questions (DN-4)<br>Volumetric oedema (mm)<br>Hand mobility (distance between the 2nd and 5th finger pulp and distal palmar line in cm)<br>Range of motion - wrist<br>Hand grip strength<br>Duruöz Hand Index |
| Binder et al., 2011 <sup>42</sup>        | P | Pr | Post-op – caesarean                                | 42 (42W)   | TENS (HF) + morphine PCA = 22                              | Morphine PCA (SoC, no TENS) = 20                                                                                                                                                             | PRN<br>Over 24 hours                                         | Pain intensity (VAS)                                                                  | Analgesic consumption (Morphine) - PCA<br>Sedation perception (VAS)                                                                                                                                                                               |
| Bjersa and Andersson, 2014 <sup>43</sup> | P | E  | Post-op – pancreatic surgery                       | 20 (N/R)   | TENS (HF) + SoC (medication) = 9                           | Placebo TENS = 11 (stimulation as low as possible) + SoC (medication)                                                                                                                        | PRN >30m/session                                             | Pain intensity (VAS)<br>• Resting (lying)<br>• On movement (walking + deep breathing) | Analgesic consumption (Morphine)<br>Quality of Recovery 40 (QoR-40)<br>EDA infusion rate (ml/h)<br>Total time of TENS usage in minutes during the day of EDA termination and the day after.                                                       |
| Bjersa et al., 2015 <sup>44</sup>        | P | E  | Post-op – colon surgery                            | 30 (14W)   | TENS (HF) + SoC (medication) = 24                          | Placebo TENS = 26 (stimulation as low as possible) + SoC (medication)                                                                                                                        | PRN >30m/session                                             | Pain intensity (VAS)<br>• Resting (lying)<br>• On movement (walking + deep breathing) | Analgesic consumption (oxycodone)<br>Time of TENS usage during the 24 hours after EDA termination<br>Quality of Recovery 40 (QoR-40)                                                                                                              |
| Bloodworth et al., 2004 <sup>45</sup>    | C | E  | Radiculopathy – chronic                            | 13 (7W)    | TENS (HF, conventional TENS back) = 13                     | Placebo TENS (0mA, back) = 13<br>Placebo TENS (0mA, leg) = 13<br>TENS (HF, leg) = 13<br>TENS (RF, back) = 13<br>TENS (RF, leg) = 13                                                          | Fixed<br>1 x 10 mins<br>1 session                            | Pain intensity (VAS)                                                                  | McGill Pain Questionnaire<br>Walking speed (feet per second)                                                                                                                                                                                      |
| Bolat et al., 2019 <sup>46</sup>         | P | Pr | Procedural pain - transrectal prostatic biopsy     | 138 (0W)   | TENS (HF) + antibiotic = 73                                | SoC - intrarectal administration of 60 mg lidocaine gel, an additional infiltration of 5 mL of prilocaïne and bupivacaine mixture (5 mL of 2% prilocaïne and 5 mL of 0.25% bupivacaine) = 65 | Fixed<br>During procedure                                    | Pain intensity (NRS)<br>• probe insertion<br>• biopsy<br>• post-biopsy                | Biopsy times                                                                                                                                                                                                                                      |
| Bono et al., 2015 <sup>47</sup>          | P | Pr | Migraine / tension-type headache - Chronic         | 160 (127W) | TENS (HF, occipital) + acute medications = 108             | Placebo TENS + acute medications = 52 (0mA)                                                                                                                                                  | Fixed<br>3 x 30 mins / day x 14 days                         | Pain intensity (VAS)                                                                  | Analgesic consumption<br>Headache-free days per month                                                                                                                                                                                             |

O8\_OL-TABLE1\_IncludedStudies

|                                            |   |    |                                                                      |            |                                                                   |                                                                                                   |                                                       |                                                                           |                                                                                                                                                                                       |
|--------------------------------------------|---|----|----------------------------------------------------------------------|------------|-------------------------------------------------------------------|---------------------------------------------------------------------------------------------------|-------------------------------------------------------|---------------------------------------------------------------------------|---------------------------------------------------------------------------------------------------------------------------------------------------------------------------------------|
|                                            |   |    |                                                                      |            |                                                                   |                                                                                                   | 14 sessions                                           |                                                                           | Allodynia symptom check list (12-item)<br>Migraine Disability Assessment Questionnaire<br>Beck Depression Inventory-II<br>Hamilton Anxiety Rating Scale                               |
| Borjesson et al., 1997 <sup>48</sup>       | P | E  | Angina – unstable                                                    | 30 (11W)   | TENS (HF) + mediation (angina/analgesia) = 14                     | Placebo TENS (low level stimulation <10mA on hips) + mediation (angina/analgesia) = 16            | Fixed<br>4 x 30 mins / day<br>plus PRN for attacks    | Pain intensity (VAS)<br>• Rest                                            | Analgesic consumption<br>Ischemic episodes, ECG and biochemical outcomes<br>Treatment feasibility including AEs                                                                       |
| Borjesson et al., 1998 <sup>49</sup>       | C | E  | Procedural Pain - oesophageal manometry pain                         | 18 (10W)   | TENS (HF) = 18 (at pain - neck)                                   | Placebo TENS = 18 (active, >SDT, remote to pain - hips)                                           | Fixed<br>Before and during procedure                  | Pain intensity (11-point Borg scale)<br>• Oesophageal distension          | Hemodynamic<br>BP, heart rate, ECG<br>Manometric variables<br>Oesophageal pH                                                                                                          |
| Borup et al., 2009 <sup>50</sup>           | P | E  | Labour pain                                                          | 607 (607W) | TENS (HF) + analgesics as needed = 144                            | Traditional analgesics (Control) (SoC, no TENS) = 149<br>Acupuncture + analgesics as needed = 314 | PRN<br>20-45 mins / sessions                          | Pain intensity (VAS)                                                      | Analgesic consumption Non-drug requirements<br>Duration of labour<br>Use of oxytocin Mode of delivery<br>Postpartum<br>Haemorrhage<br>Apgar score<br>Umbilical cord<br>blood pH value |
| Breit and Van der Wall, 2004 <sup>51</sup> | P | E  | Post-op - total knee arthroplasty                                    | 67 (37W)   | TENS (NR) + morphine PCA = 25                                     | Placebo TENS (0mA) + morphine PCA = 22<br>Morphine PCA (SoC, no TENS) = 22                        | PRN<br>1 x 24h post op                                | Pain intensity (VAS)                                                      | Analgesic consumption<br>• Cumulative dose morphine by PCA                                                                                                                            |
| Buchmuller et al., 2012 <sup>52</sup>      | P | Pr | Back pain – chronic low non-specific with and without radicular pain | 236 (148W) | TENS (HF+LF burst) + daily analgesic medication as required = 117 | Placebo TENS (0mA) + daily analgesic medication as required = 119                                 | Fixed<br>4 x 60 mins / day x 3 months<br>~?? sessions | Pain intensity (VAS)<br>• Weekly                                          | Analgesic consumption (anti-inflammatory)<br>Roland Morris Disability Questionnaire<br>Dallas questionnaire<br>SF-36<br>Compliance with TENS treatment<br>Quality of life             |
| Bulut et al., 2011 <sup>53</sup>           | P | Pr | Neuropathic pain – chronic peripheral                                | 40 (23W)   | TENS (HF) = 20                                                    | Placebo TENS = 20 (0mA)                                                                           | Fixed<br>1 x 30 mins / day x 20 days<br>20 sessions   | Pain intensity (VAS)                                                      | Pain grade (6 categories)                                                                                                                                                             |
| Bundsen et al., 1982 <sup>54</sup>         | P | Pr | Labour pain                                                          | 24 (24W)   | TENS (HF + LF burst) = 15                                         | Conventional analgesia, control) (SoC, no TENS) = 9                                               | PRN<br>>1 x 15-30 mins<br>During Labour               | Pain intensity (5-point categorical scale)<br>• low-back / abdominal pain | Pain experience questionnaire<br>Uterine activity<br>Foetal and neonatal condition                                                                                                    |
| Can et al., 2003 <sup>55</sup>             | P | E  | Knee – chronic, patellofemoral pain                                  | 30 (22W)   | TENS (HF) = 16 (23 knees)                                         | Diadynamic current = 14 (19 knees)                                                                | Fixed                                                 | Pain intensity (VAS)                                                      | Lysholm knee scoring scale and squat                                                                                                                                                  |

08\_OL-TABLE1\_IncludedStudies

|                                                     |   |    |                                                   |            |                                                                   |                                                                                                                                                                                                     |                                                                   |                                                |                                                                                                                         |
|-----------------------------------------------------|---|----|---------------------------------------------------|------------|-------------------------------------------------------------------|-----------------------------------------------------------------------------------------------------------------------------------------------------------------------------------------------------|-------------------------------------------------------------------|------------------------------------------------|-------------------------------------------------------------------------------------------------------------------------|
|                                                     |   |    |                                                   |            |                                                                   |                                                                                                                                                                                                     | 1 x 30 mins x 4 to 5 / week x 6 weeks<br><30 sessions             |                                                | Number of squats performed in 30 seconds<br>4-level activity test                                                       |
| Casale et al., 2013 <sup>56</sup>                   | P | Pr | Carpal tunnel syndrome                            | 20 (10W)   | TENS (HF) = 10                                                    | Low level laser therapy = 10                                                                                                                                                                        | Fixed<br>1 x 30 mins / day x 3 weeks<br>15 sessions               | Pain intensity (VAS)                           | Severity paraesthesia<br>Median nerve distal motor latency and sensory nerve conduction velocity                        |
| Çebi, 2019 <sup>57</sup>                            | P | Pr | Post op - pain after impacted third molar surgery | 30 (15W)   | TENS (HF) = ?15                                                   | Routine care (SoC, Pharmacological - Flurbiprofen 100 mg, amoxicillin, chlorhexidine gluconate) = ? 15                                                                                              | Fixed<br>1 x 15 mins / day x 5 days                               | Pain intensity (VAS)                           | None                                                                                                                    |
| Celik et al., 2013 <sup>58</sup>                    | P | Pr | Spinal cord injury, neuropathic pain              | 33 (9W)    | TENS (LF) = 17                                                    | Placebo TENS = 16 (0mA) = 16                                                                                                                                                                        | Fixed<br>1x 30m /day x 10 days<br>10 sessions                     | Pain intensity (VAS)                           | None                                                                                                                    |
| Cetin et al., 2008 <sup>59</sup>                    | P | Pr | Osteoarthritis - knee                             | 100 (100W) | TENS (HF) + hot packs + isokinetic exercise = 20 (Group 2)        | Hot packs + isokinetic exercise) (SoC, no TENS) = 20<br>Shortwave diathermy + hot packs + isokinetic exercise = 20<br>Ultrasound + hot packs + isokinetic exercise = 20<br>Isokinetic exercise = 20 | Fixed<br>1 x 20 mins x 3 / week x 8 weeks<br>24 sessions          | Pain intensity (VAS)<br>• After walk           | Ambulation Activity - time (secs) to walk 50 m<br>Lequesne index<br>Peak torque levels (N·m) knee flexion and extension |
| Chandra et al., 2010 <sup>60</sup>                  | P | E  | Post-op – thoracotomy                             | 60 (29W)   | TENS (HF) + epidural 10 ml of 0.125% bupivacaine at 2-hourly = 30 | Placebo TENS (0mA) + epidural 10 ml of 0.125% bupivacaine at 2-hourly = 30                                                                                                                          | Fixed<br>1 x 45 mins                                              | Pain intensity (VAS)                           | Systolic blood pressure<br>Side effects.                                                                                |
| Cheing and Hui-Chan, 1999 <sup>61</sup>             | P | E  | Back pain - chronic low non-specific              | 30 (9W)    | TENS (HF) = 15                                                    | Placebo TENS = 15 (0mA)                                                                                                                                                                             | Fixed<br>1 x 60 mins                                              | Pain intensity (VAS)                           | Pain intensity (VAS) to electrically-evoked pain                                                                        |
| Cheing and Luk, 2005 <sup>62</sup>                  | P | E  | Neuropathic pain                                  | 19 (3W)    | TENS (HF) = 10                                                    | Placebo TENS = 9 (0mA)                                                                                                                                                                              | Fixed<br>1x 20m/day x5 days x 2weeks<br>10 sessions               | Pain intensity (VAS)                           | Downey Hand Centre Hand Sensitivity Test<br>Flexion reflex                                                              |
| Cheing et al., 2002 <sup>63</sup>                   | P | E  | Osteoarthritis - knee                             | 62 (52W)   | TENS (HF) = 16                                                    | Placebo TENS = 16 (0mA)<br>Exercise (SoC, no TENS control) = 15<br>TENS + Exercise =15                                                                                                              | Fixed<br>1 x 60 mins/day x 5 days / week x 4 weeks<br>20 sessions | Pain intensity (VAS)                           | None                                                                                                                    |
| Cheing et al., 2003 <sup>64</sup>                   | P | E  | Osteoarthritis - knee                             | 38 (34W)   | TENS (HF) = 10 (60 mins)                                          | Placebo TENS = 8 (0mA)<br>TENS = 10 (20 mins)<br>TENS = 10 (40 mins)                                                                                                                                | Fixed<br>1 x 60 mins/day x 5 days / week x 2 weeks<br>10 sessions | Pain intensity (VAS)<br>• On movement          | Time of 'half-life' for analgesic effect                                                                                |
| Chellappa and Thirupathy, 2020 <sup>65</sup>        | P | Pr | Temporomandibular joint disorder                  | 60 (NR)    | TENS (HF) = 30                                                    | LLLT = 30                                                                                                                                                                                           | Fixed<br>1 x 15 min/day x 2 / week x 3 weeks                      | Pain intensity (VAS, may be categorical scale) | Range of motion<br>Palpation                                                                                            |
| Cherian et al., 2016 <sup>66</sup> – Primary Report | P | Pr | Osteoarthritis - knee                             | 70 (46)    | TENS (AF) = 33                                                    | Standard of care = corticosteroid injections + exercises + pharmaceutical management) (SoC, no TENS) = 10                                                                                           | PRN<br>mean = 27 hours / week x 3 months                          | Pain intensity (VAS)                           | Analgesic consumption<br>Knee Society Scale (KSS)<br>Lower extremity functional scale (LEFS)                            |

08\_OL-TABLE1\_IncludedStudies

|                                                                                                    |   |    |                                                              |                                              |                                                      |                                                                                                |                                                             |                                                                       |                                                                                                                                                                                                                                                                                                                    |
|----------------------------------------------------------------------------------------------------|---|----|--------------------------------------------------------------|----------------------------------------------|------------------------------------------------------|------------------------------------------------------------------------------------------------|-------------------------------------------------------------|-----------------------------------------------------------------------|--------------------------------------------------------------------------------------------------------------------------------------------------------------------------------------------------------------------------------------------------------------------------------------------------------------------|
| Secondary Reports<br>Cherian et al., 2015 <sup>67</sup><br>Cherian et al., 2016 <sup>68</sup>      |   |    |                                                              |                                              |                                                      |                                                                                                |                                                             |                                                                       | SF-36<br>Timed up and-go (TUG)<br>5-repetition chair rise<br>Timed stair climb test<br>6-inch step test<br>2-minute walk test<br>Isokinetic strength<br>Active and passive range of motion.                                                                                                                        |
| Chesterton et al., 2013 <sup>69</sup><br><br>Secondary Report<br>Lewis, et al., 2015 <sup>70</sup> | P | Pr | Tendinitis - Lateral epicondylitis - Tennis elbow            | 241 (109W)                                   | TENS (HF) + Primary care management = 121            | Primary care management (exercises + education) (SoC, no TENS) = 120                           | PRN > 1 x 45 mins / day whenever symptoms x 6 weeks         | Pain intensity (NRS)                                                  | Global change in elbow pain (5-point adjectival scale)<br>Pain and limitation in function (patient-rated tennis elbow evaluation)<br>Number of days of sick leave due to tennis elbow<br>EuroQoL EQ-5D (Quality of life)<br>SF-12<br>Changes in health beliefs and perceptions<br>Adherence to treatment protocols |
| Chia et al., 1990 <sup>71</sup>                                                                    | P | Pr | Labour pain                                                  | Sample 1: 101 (101W)<br>Sample 2: 20 (20W) - | Sample 1: TENS (AF) = 48<br>Sample 2: TENS (AF) = 10 | Sample 1: Inhalation analgesia = 53 (ENTONOX)<br>Sample 2: Inhalation analgesia = 10 (ENTONOX) | PRN During labour                                           | Pain intensity (categorical scale)<br>Pain relief (categorical scale) | Analgesic consumption<br>• Request<br>Treatment failure - request to change type of treatment<br>Duration of use of treatment<br>Cervical dilatation and number of contractions / 10 mins                                                                                                                          |
| Chiou et al., 2019 <sup>72</sup>                                                                   | P | Pr | Myofascial pain in neck and shoulder from spinal cord injury | 64 (12W)                                     | TENS (LF/HF, on trigger points) = 30                 | TENS (HF, on remote acupuncture Points) = 30                                                   | Fixed 1 x 20 mins / day x 7 days x 1 week                   | Pain intensity (VAS)                                                  | Short-form McGill Pain Questionnaire<br>Hospital Anxiety and Depression Scale<br>Pittsburgh Sleep Quality Index                                                                                                                                                                                                    |
| Chitsaz et al., 2009 <sup>73</sup>                                                                 | P | Pr | Spasticity – multiple sclerosis                              | 59 (44W)                                     | TENS (HF) = 29                                       | Nortriptyline = 30                                                                             | PRN >20-30 mins x 3/day x 8 weeks                           | Pain intensity (VAS)<br>• Average                                     | Intensity of sensory complaints (VAS)                                                                                                                                                                                                                                                                              |
| Chiu et al., 2005 <sup>74</sup>                                                                    | P | Pr | Neck pain - chronic non-specific                             | 218 (149W)                                   | TENS (HF) + infrared radiation = 78                  | Exercise + Infrared radiation = 67<br>Infrared radiation alone (warmth) = 78                   | Fixed 1 x 30 mins / day x 2 / week x 6 weeks<br>12 sessions | Pain intensity (NRS, verbal)                                          | Analgesic consumption<br>Northwick Park Neck Pain questionnaire<br>Percentage subjects on sick leave<br>Peak isometric strength neck muscles.                                                                                                                                                                      |
| Cipriano et al., 2008 <sup>75</sup>                                                                | P | Pr | Post-op – cardiac surgery                                    | 45 (13W)                                     | TENS (HF) = 23                                       | Placebo TENS = 22 (active, >SDT-infrequent pulses)                                             | Fixed 1 x 240mins (4h) on the third postoperative           | Pain intensity (VAS)<br>• Cough                                       | Spirometry<br>• vital capacity<br>• tidal volume<br>• respiratory rate<br>Electrical muscle activity (EMG)                                                                                                                                                                                                         |
| Cipriano et al., 2014 <sup>76</sup>                                                                | P | E  | Post-op cardiac surgery                                      | 38 (18W)                                     | TENS (HF) + pethidine HCl, 20 mg = 20                | Placebo TENS (active, >SDT-infrequent pulses) + pethidine HCl, 20 mg = 18 (active)             | Fixed 4 x 30mins/day x 5 days<br>5 sessions                 | Pain intensity (VAS)                                                  | Analgesic consumption (Opioid)<br>Physiological measurements<br>Mean arterial pressure                                                                                                                                                                                                                             |



O8\_OL-TABLE1\_IncludedStudies

|                                             |   |    |                                            |            |                                                                                         |                                                                                                                   |                                                                |                                                              |                                                                                                                                                                                                              |
|---------------------------------------------|---|----|--------------------------------------------|------------|-----------------------------------------------------------------------------------------|-------------------------------------------------------------------------------------------------------------------|----------------------------------------------------------------|--------------------------------------------------------------|--------------------------------------------------------------------------------------------------------------------------------------------------------------------------------------------------------------|
|                                             |   |    |                                            |            |                                                                                         |                                                                                                                   |                                                                |                                                              | Femoral blood flow<br>Femoral vascular conductance<br>Beta-Endorphin levels<br>Sympathetic stimulation test<br>6-min walking test                                                                            |
| Coelho de Amorim et al., 2014 <sup>77</sup> | P | Pr | Osteoarthritis - knee                      | 24 (20W)   | TENS (HF) = 12                                                                          | Manual therapy = 12                                                                                               | Fixed<br>1 x 20 mins / day x 3 / week x 4 weeks<br>12 sessions | Pain intensity (VAS)                                         | WOMAC<br>Stiffness<br>Function                                                                                                                                                                               |
| Cooperman et al., 1977 <sup>78</sup>        | P | Pr | Post-op – abdomen                          | 50 (36W)   | TENS (HF) + analgesics as rescue (diazepam, 10 mg i.m., meperidol, 75-100 mg i.m.) = 26 | Placebo TENS = 24 (0mA)                                                                                           | PRN x 5 days                                                   | No primary outcomes                                          | Analgesic consumption                                                                                                                                                                                        |
| Coyne et al., 1995 <sup>79</sup>            | P | E  | Procedural pain - intravenous needlesticks | 61 (35W)   | TENS (HF) = 19                                                                          | Placebo TENS = 21 (not described)                                                                                 | Fixed<br>1 x 12-32 mins<br>1 session                           | Pain intensity (VAS)                                         | Pain unpleasantness (VAS)                                                                                                                                                                                    |
| Crompton et al., 1992 <sup>80</sup>         | P | Pr | Procedural pain – cervical laser treatment | 100 (100W) | TENS (HF) = 34                                                                          | Local anaesthetic (SoC, no TENS) = 35<br>TENS + local anaesthetic (lignocaine) = 29                               | Fixed<br>1 x <20 mins (duration of procedure)                  | Pain intensity (VAS)                                         | Satisfaction and utility of TENS                                                                                                                                                                             |
| Cuschieri et al., 1985 <sup>81</sup>        | P | Pr | Post-op – abdomen                          | 106 (62W)  | TENS (HF) + morphine = 53                                                               | Placebo TENS + morphine = 53 (0mA)                                                                                | PRN<br>72 hours                                                | Pain intensity (VAS)                                         | Analgesic consumption (Morphine)<br>Arterial blood gas analysis<br>Pulmonary complications                                                                                                                   |
| Cuschieri et al., 1987 <sup>82</sup>        | P | Pr | Ischaemic pain - critical leg at rest      | 20 (10W)   | TENS (NR) + morphine = 10                                                               | Placebo TENS + morphine = 10 (0mA)                                                                                | PRN<br>48 hours                                                | Pain intensity (VAS)                                         | Analgesic consumption (Morphine)                                                                                                                                                                             |
| da Silva et al., 2008 <sup>83</sup>         | P | Pr | Fibromyalgia                               | 10 (9W)    | TENS (HF) = 5                                                                           | Hydrotherapy = 5                                                                                                  | Fixed<br>1 x 40 mins/day x3/week x 3 weeks<br>9 sessions       | Pain intensity (VAS)                                         | SF-36<br>Nottingham Health Profile<br>Beck Depression Index<br>Finger-to-floor test (flexibility test)                                                                                                       |
| da Silva et al., 2015 <sup>84</sup>         | P | Pr | Post-op – liposuction                      | 42 (42W)   | TENS (HF) + analgesics (morphine + dipyrone) = 21                                       | Placebo TENS + analgesics (morphine + dipyrone) = 21 (0mA)                                                        | Fixed<br>1 x 30 mins (2h after procedure<br>1 session)         | Pain intensity (VAS)                                         | Analgesic consumption<br>Number and types of adverse effects<br>McGill Pain Questionnaire<br>Patient satisfaction                                                                                            |
| Dailey et al., 2013 <sup>85</sup>           | C | E  | Fibromyalgia                               | 43 (40W)   | TENS (HF) + other treatments (stable) = 43                                              | Placebo TENS = 43 (fading) + other treatments (stable)<br>No TENS + other treatments (stable) (SoC, no TENS) = 43 | Fixed<br>1 x 60-75 mins<br>1 session                           | Pain intensity (VAS)<br>• Resting pain<br>• Pain on movement | Pressure pain threshold at tender points (algometry)<br>Conditioned pain modulation<br>Fatigue at rest and movement (VAS)<br>6 Minute Walk Test<br>Range of Motion<br>Sit to Stand Test<br>Single Leg Stance |
| Dailey et al., 2020 <sup>86</sup>           | P | Pr | Fibromyalgia                               | 301 (301W) | TENS (MF) + routine care (pharmacology) = 103                                           | Placebo TENS (F) = 99                                                                                             | PRN                                                            | Pain intensity (NRS)                                         | Brief Pain Inventory                                                                                                                                                                                         |

08\_OL-TABLE1\_IncludedStudies

|                                       |   |    |                                                    |            |                                                                                            |                                                                                                     |                                                       |                                                                                                                  |                                                                                                                                                                                                                                                                    |
|---------------------------------------|---|----|----------------------------------------------------|------------|--------------------------------------------------------------------------------------------|-----------------------------------------------------------------------------------------------------|-------------------------------------------------------|------------------------------------------------------------------------------------------------------------------|--------------------------------------------------------------------------------------------------------------------------------------------------------------------------------------------------------------------------------------------------------------------|
|                                       |   |    |                                                    |            |                                                                                            | No TENS (SoC, pharmacology) = 99                                                                    | At home during activity > 1 x 2 hours / day x 4 weeks | <ul style="list-style-type: none"> <li>Resting pain</li> <li>Pain on movement (during 6min walk test)</li> </ul> | Fatigue to 6MWT (NRS) and Multidimensional Assessment of Fatigue Function - International Physical Activity Questionnaire (IPAQ) short form<br>Disease impact<br>Quality of life<br>Global impression of change<br>Fear of Movement<br>Other psychological factors |
| Davies, 1982 <sup>87</sup>            | P | Pr | Post-op – caesarean                                | 35 (35W)   | TENS (HF) + analgesics (papaveretum i.m., paracetamol, Dextropropoxphene as required) = 21 | Placebo TENS (0mA) + analgesics (papaveretum i.m., paracetamol, Dextropropoxphene as required) = 14 | PRN<br>24 hours                                       | Pain intensity (VAS)                                                                                             | Analgesic consumption (opioid)                                                                                                                                                                                                                                     |
| Dawood and Ramos, 1990 <sup>88</sup>  | C | E  | Dysmenorrhea - primary                             | 32 (32W)   | TENS (HF) + ibuprofen if needed = 32                                                       | Placebo TENS + ibuprofen if needed = 32 (0mA)<br>Ibuprofen (SoC, no TENS) = 32                      | PRN continuously for first 8 hours then PRN           | Pain intensity (5 item categorical scale)                                                                        | Analgesic consumption (Ibuprofen)<br>Pain relief (5 item category scale)<br>Menstrual symptoms including pain intensity (5 categories)                                                                                                                             |
| De Angelis et al., 2003 <sup>89</sup> | P | Pr | Procedural pain – hysterectomy                     | 142 (142W) | TENS (HF) = 71                                                                             | No treatment = 71                                                                                   | Fixed<br>Duration of procedure                        | Pain intensity (VAS) during procedure                                                                            | Pain relief<br>Duration of hysterectomy<br>CO <sub>2</sub> flow<br>Heart rate                                                                                                                                                                                      |
| De Giorgi et al., 2017 <sup>90</sup>  | P | Pr | Myalgia - Chronic facial (temporomandibular joint) | 49 (49W)   | TENS (HF) = 34                                                                             | No treatment (waiting list control) = 15                                                            | Fixed<br>1 x 60 mins /day x 10 weeks<br>10 sessions   | Pain intensity (VAS)                                                                                             | Pericranial Muscle Tenderness Score<br>Cervical Muscle Tenderness Score                                                                                                                                                                                            |
| de Oliveira, 2012 <sup>91</sup>       | P | E  | Dysmenorrhea - primary                             | 15 (15W)   | TENS (HF) = 5                                                                              | Placebo TENS = 5 (0mA)<br>TENS (LF) = 5                                                             | Fixed<br>1 x 30 mins<br>1 session                     | Pain intensity (NRS)                                                                                             | Pain interference with daily activities (NRS)                                                                                                                                                                                                                      |
| de Orange et al., 2003 <sup>92</sup>  | P | Pr | Labour pain                                        | 22 (22W)   | TENS (HF) + (Bupivacaine + Sufentanyl epidural) – 11                                       | Analgesic - (Bupivacaine + Sufentanyl epidural (SoC, no TENS) = 11                                  | PRN                                                   | Pain intensity (VAS)                                                                                             | Duration of labour<br>Frequency of hypoxia<br>Apgar score                                                                                                                                                                                                          |
| de Sousa et al., 2014 <sup>93</sup>   | P | E  | Post-partum uterine contraction pain               | 32 (32W)   | TENS (HF) = 16                                                                             | No treatment = 16                                                                                   | Fixed<br>40 mins during breast feeding<br>1 session   | Pain intensity (NRS)                                                                                             | Treatment satisfaction                                                                                                                                                                                                                                             |
| DeSantana et al., 2008 <sup>94</sup>  | P | Pr | Post-op – inguinal herniorrhaphy                   | 40 (0W)    | TENS (HF) + Metamizole (Dipyrone) = 20                                                     | Placebo TENS (0mA) + Metamizole (Dipyrone) = 20                                                     | Fixed<br>12 x 30 mins at 2h then 4h Post-op           | Pain intensity (NRS)<br>• Resting pain                                                                           | Analgesic consumption (Metamizole)<br>Nausea medication consumption<br>TENS-Related Questions                                                                                                                                                                      |
| DeSantana et al., 2009 <sup>95</sup>  | P | E  | Post-op – laparoscopic tubal ligation              | 64 (64W)   | TENS (HF) + medication (Ketoprofen, Hioscin plus Dipyrone and Metochlopramide) = 23        | Placebo TENS + medication (Ketoprofen, Hioscin plus Dipyrone and Metochlopramide) = 21 (0mA)        | Fixed<br>1 x 20min<br>1 sessions                      | Pain intensity (NRS)                                                                                             | McGill Pain Questionnaire                                                                                                                                                                                                                                          |

08\_OL-TABLE1\_IncludedStudies

|                                          |   |    |                                                                                 |           |                                                 |                                                                                             |                                                                                        |                                                    |                                                                                                                                                                                                                                                                                      |
|------------------------------------------|---|----|---------------------------------------------------------------------------------|-----------|-------------------------------------------------|---------------------------------------------------------------------------------------------|----------------------------------------------------------------------------------------|----------------------------------------------------|--------------------------------------------------------------------------------------------------------------------------------------------------------------------------------------------------------------------------------------------------------------------------------------|
|                                          |   |    |                                                                                 |           |                                                 | TENS (LF) + medication (Ketoprophen, Hioscine plus Dipyrone and Metochlopramide) = 20       |                                                                                        |                                                    |                                                                                                                                                                                                                                                                                      |
| Dewan and Sharma, 2011 <sup>96</sup>     | P | Pr | Adhesive capsulitis                                                             | 50 (NR)   | TENS (HF) = 25                                  | IFT= 25                                                                                     | Fixed<br>1 x 20 mins x 2 to 3 / week x 4 weeks<br>10 sessions                          | Pain intensity (VAS)                               | Range of motion<br>Constant Murley Assessment (CMA) score                                                                                                                                                                                                                            |
| Deyo et al. (1990) <sup>97</sup>         | P | Pr | Back pain – chronic, low, non-specific                                          | 125 (73)  | TENS (AF, HF, LF burst) = 31                    | Placebo TENS = 29 (0mA)<br><br>Placebo TENS + exercises = 29 (0mA)<br>TENS + exercises = 34 | Fixed<br>1 x 45 min x 3/day<br>3 sessions                                              | Pain intensity (VAS)                               | Pain improvement (6-point scale)<br>Pain improvement (VAS)<br>Pain frequency (5-point scale)<br>Sickness Impact profile<br>Level of activity (self-assessed 3 categories)<br>Straight leg raising test<br>Schober test<br>Use of medical providers                                   |
| Dibenedetto et al., 1993 <sup>98</sup>   | P | Pr | Fibromyalgia                                                                    | 30 (29W)  | TENS (HF) = 15                                  | S = Adenosyl-L methionine = 15                                                              | Fixed<br>1 x 20 mins / day at each of 4 MTPs<br>5 days / week x 6 weeks<br>30 sessions | Pain intensity (VAS)                               | Total tender point score<br>• Number<br>• Tenderness intensity (5-point scale)<br>Pressure pain threshold (algometry)<br>Hamilton Rating Scale for Depression<br>Fatigue, sleep, and well-being (VAS)<br>Laboratory tests (complete blood picture)<br>Overall evaluation of efficacy |
| Dilekci et al., 2016 <sup>99</sup>       | P | Pr | Tendinitis - Lateral epicondylitis                                              | 65 (43W)  | TENS (HF) + SoC including NSAIDs = 30           | Standard of care (SoC, no TENS) = 30                                                        | Fixed<br>1 x 30 mins / day<br>10 sessions                                              | Pain intensity (VAS)<br>• At rest<br>• On movement | Patient-Rated Tennis Elbow Evaluation (PRTEE) questionnaire                                                                                                                                                                                                                          |
| Dissanayaka et al., 2016 <sup>100</sup>  | P | Pr | Myofascial pain – syndrome patients with up/ trapezius myofascial trigger point | 105 (58W) | TENS (HF) + SoC = 35                            | Standard care (SoC, no TENS) = 35<br>IFT+ standard care = 35                                | Fixed<br>1 x 20 mins x 2 / week x 4 weeks<br>8 sessions                                | Pain intensity (VAS)                               | Range of motion – cervical                                                                                                                                                                                                                                                           |
| Dogu et al., 2008 <sup>101</sup>         | P | Pr | Myofascial pain and temporomandibular disorders                                 | 30 (28W)  | TENS (HF) + rescue analgesic (paracetamol) = 14 | Occlusal splint (SoC) = 16                                                                  | Fixed<br>1 x 30 mins / day x 5 days / week x 4 weeks<br>20 sessions.                   | No pain intensity                                  | Pressure-pain threshold (algometry) during rest and functional activities<br>Pain and range of motion<br>Quality of life both general and specific to masticatory functions<br>SF-36                                                                                                 |
| Domaille and Reeves, 1997 <sup>102</sup> | P | E  | Post-op – coronary artery bypass                                                | 60 (0W)   | TENS (HF) + 1 mg morphine PCA = 31              | Placebo TENS+ 1 mg morphine PCA = 29 (0mA)                                                  | Fixed<br>1 x 3h                                                                        | Pain intensity (VAS)                               | Analgesic consumption (Morphine) - PCA                                                                                                                                                                                                                                               |

O8\_OL-TABLE1\_IncludedStudies

|                                                                 |   |    |                                                                                 |            |                                                                            |                                                                                                                           |                                                                                  |                                                                    |                                                                                                                     |
|-----------------------------------------------------------------|---|----|---------------------------------------------------------------------------------|------------|----------------------------------------------------------------------------|---------------------------------------------------------------------------------------------------------------------------|----------------------------------------------------------------------------------|--------------------------------------------------------------------|---------------------------------------------------------------------------------------------------------------------|
| Ebadi et al., 2018 <sup>103</sup>                               | P | E  | Back pain – chronic, low, non-specific                                          | 30 (15W)   | TENS (HF) = 15                                                             | Diadynamic = 15                                                                                                           | Fixed<br>1 x 15 mins                                                             | Pain intensity (VAS)                                               | Pressure pain threshold (algometry)<br>Depression Anxiety and Stress Scale (DASS)                                   |
| Eklblom and Hansson, 1987 <sup>104</sup>                        | C | E  | Oral – acute pain from teeth and/ or surrounding tissue                         | 40 (17W)   | TENS (HF) = 11                                                             | Placebo TENS = 5 (0mA)<br>TENS (LF) = 11<br>Vibration = 8<br>Placebo vibration = 5                                        | Fixed<br>1 x 30 mins<br>1 session                                                | Pain intensity (VAS)                                               | Thermal threshold (heat and cold)                                                                                   |
| Ekim et al., 2008 <sup>105</sup>                                | P | Pr | Hemiplegic Shoulder Pain                                                        | 19 (8W)    | TENS (HF) + Hemiplegia rehabilitation = 10                                 | Placebo TENS (0mA) + Hemiplegia rehabilitation = 9                                                                        | Fixed<br>1 x 20 minutes / day x 5 / week x 3 weeks<br>15 sessions                | Pain Intensity (VAS)                                               | Barthel Index<br>Range of motion - upper limb                                                                       |
| Elboim-Gabyzon et al., 2019 <sup>106</sup>                      | P | Pr | Post op - following Gamma-nail surgical fixation of extracapsular hip fractures | 41 (32W)   | TENS (HF) + SoC – physiotherapy = 23                                       | Placebo TENS (0mA) + SoC – physiotherapy = 18                                                                             | Fixed<br>1 x 30 mins / day x 5 days<br>5 sessions                                | Pain Intensity (NRS)<br>• rest<br>• during night during ambulation | Functional Ambulation Classification instrument<br>Time to complete five sit-to-stand tests<br>Two-minute walk test |
| Elserty et al., 2016 <sup>107</sup>                             | P | Pr | Back pain – chronic, low, non-specific                                          | 45 (31W)   | TENS (HF) + exercise = 15 (pulse amplitude adjusted every 5 mins, Group B) | Exercises only (SoC, no TENS, Group C) = 15<br>TENS + exercise = 15 (Fixed pulse amplitude, Group A)                      | Fixed<br>1 x 40 mins x 3 / week x 4 weeks                                        | Pain intensity (VAS)                                               | Oswestry Disability Index (ODI)<br>Lumbar range of motion (flexion and extension)                                   |
| Emmiler et al., 2008 <sup>108</sup>                             | P | Pr | Post-op – open cardiac operation                                                | 60 (18W)   | TENS (HF) + analgesia (pethidine and metamizole) = 20                      | Placebo TENS + analgesia (pethidine and metamizole) = 20 (0mA)<br>Analgesia (pethidine and metamizole (SoC, no TENS) = 20 | Fixed<br>1 x 60 mins then 60 mins rest then 1 x 60 mins                          | Pain intensity (VAS)                                               | Analgesic consumption                                                                                               |
| Engen et al., 2016 <sup>109</sup>                               | P | Pr | Post-op – video assisted thoracoscopic surgery                                  | 40 (23W)   | TENS (VF) + Opioids (morphine - oral) = 20                                 | Opioids (morphine - oral) (SoC, no TENS) = 20                                                                             | PRN for 48 hours after surgery                                                   | Pain intensity (VAS)                                               | Analgesic consumption (opioids + blocks)<br>Rating of physical status<br>TENS satisfaction and utility              |
| Erden and Senol Celik, 2015 <sup>110</sup>                      | P | Pr | Post-op -posterolateral thoracotomy                                             | 40 (10W)   | TENS (HF) + analgesics (tramadol / tamoxicam) = 20                         | No TENS + analgesics (tramadol / tamoxicam) (SoC, no TENS) = 20                                                           | Fixed<br>3 x 30 mins / day x 2 days then 2 x 30 mins / day                       | Pain intensity (VAS)<br>• Resting pain<br>• During cough           | Analgesic consumption (Opioid)                                                                                      |
| Erdogan et al., 2005 <sup>111</sup>                             | P | Pr | Post-op thoracotomy pain                                                        | 116 (46W)  | TENS (HF) + standard medication as needed) = 60                            | Placebo TENS (0mA) + standard medication as needed = 56                                                                   | PRN for 48 hours then 1 x 20 mins at 3-hour intervals for 2 days 5 days in total | Pain intensity (VAS)<br>• Resting pain<br>• During cough           | Analgesic consumption<br>Spirometric breath functions (FEV1 and FVC)<br>Blood gases (PaO2 and PaCO2)                |
| Erkkola et al., 1980 <sup>112</sup>                             | P | Pr | Labour pain                                                                     | 200 (200W) | TENS (NR) + meperidine = 100                                               | No TENS + meperidine (SoC, no TENS) = 100                                                                                 | PRN throughout delivery                                                          | Pain intensity (5-point categorical scale)                         | Pain questionnaire (no description)<br>Desire for analgesics                                                        |
| Escortell-Mayor et al., 2011 <sup>113</sup><br>Secondary Report | P | E  | Neck pain - chronic non-specific ('mechanical neck disorder')                   | 90 (80W)   | TENS (HF) + exercises and education = 43                                   | Manual therapy + exercises and education (SoC, no TENS) = 47                                                              | Fixed<br>1 x 30 mins / day every 2 days total<br>10 sessions                     | Pain intensity (VAS)                                               | Neck Disability Index<br>SF-12<br>Physical Component Summary (PSC-12)                                               |

O8\_OL-TABLE1\_IncludedStudies

|                                              |   |    |                                          |            |                                                                                  |                                                                                                            |                                                                                   |                                                                                      |                                                                                                                                                        |
|----------------------------------------------|---|----|------------------------------------------|------------|----------------------------------------------------------------------------------|------------------------------------------------------------------------------------------------------------|-----------------------------------------------------------------------------------|--------------------------------------------------------------------------------------|--------------------------------------------------------------------------------------------------------------------------------------------------------|
| Escortell Mayor et al., 2008 <sup>114</sup>  |   |    |                                          |            |                                                                                  |                                                                                                            |                                                                                   |                                                                                      | Mental Component Summary (MCS-12)<br>Duration of crisis (days)<br>General Health Questionnaire-28                                                      |
| Esteban Gonzalez et al., 2015 <sup>115</sup> | P | Pr | Post-op - thoracotomy (shoulder pain)    | 50 (10W)   | TENS (HF) + analgesics (epidural - paracetamol and ibuprofen or metamizole) = 25 | Placebo TENS = 25 (0mA) + analgesics (epidural - paracetamol and ibuprofen or metamizole)                  | Fixed<br>1 x 30 mins every 8 hours x 3 days                                       | Pain intensity (VAS)<br>• on movement                                                | Range of motion                                                                                                                                        |
| Eyigor et al., 2008 <sup>116</sup>           | P | Pr | Osteoarthritis - Knee                    | 45(34W)    | TENS (HF) + superficial heat and exercise = 14                                   | Control - superficial heat and exercise (SoC, no TENS) = 15<br><br>US + superficial heat and exercise = 15 | Fixed<br>1 x 20 mins / day x 5 days / week x 3 weeks<br>15 sessions               | Pain intensity (VAS)                                                                 | 20-meter walking test<br>Lequesne index<br>WOMAC<br>Isokinetic muscle testing<br>SF 36                                                                 |
| Eyigor et al., 2010 <sup>117</sup>           | P | Pr | Tendinitis – rotator cuff                | 40 (29W)   | TENS (HF) + exercises (Codman) + Paracetamol = 20                                | Intra articular injection of corticosteroid (+ exercises (Codman) + Paracetamol) = 20                      | Fixed<br>5 x 30 mins / week for 3 weeks<br>15 sessions                            | Pain intensity (VAS)<br>• Resting pain                                               | Analgesic consumption (Paracetamol)<br>Range of motion<br>Shoulder disability questionnaire (SDQ)<br>Beck depression inventory<br>Doctors satisfaction |
| Facci et al., 2011 <sup>118</sup>            | P | Pr | Back pain – Chronic, low, non-specific   | 150 (109W) | TENS (HF) = 50                                                                   | No treatment (waiting list) = 50<br>IFT= 50                                                                | Fixed<br>1 x 30 mins / day x 5 days x 2 weeks<br>10 sessions                      | Pain intensity (VAS)                                                                 | McGill Pain Questionnaire<br>Analgesic consumption<br>Duration of pain relieve post intervention                                                       |
| Farahani et al., 2014 <sup>119</sup>         | P | E  | Headache – primary                       | 45 (20W)   | TENS (NR) = 15                                                                   | No treatment = 15<br>Neurofeedback behavioural therapy = 15                                                | Fixed<br>1 x 20 mins / day x 20 days<br><br>20 sessions                           | Pain intensity (? VAS – 100mm)                                                       | Frequency of pain<br>Duration of headache<br>Blanchard headache diary                                                                                  |
| Farina et al., 2004 <sup>120</sup>           | P | Pr | Upper trapezius Myofascial pain syndrome | 40 (30W)   | TENS (HF) = 21                                                                   | Frequency modulated neural stimulation = 19                                                                | Fixed<br>1 x 20 mins / day x 5 days / week x 2 weeks<br>10 sessions               | No pain intensity                                                                    | Disability (NPDVAS)<br>Myofascial trigger point characteristics<br>Pressure pain threshold (algometry).<br>Range of motion                             |
| Fatima and Sarfraz, 2019 <sup>121</sup>      | P | Pr | Post op - Caesarean                      | 50 (50W)   | TENS (HF) + exercises + analgesics as needed = 25                                | TENS (LF, 4Hz) + exercises + analgesics as needed = 25                                                     | Fixed<br>2 x 20 mins / day x 3 days<br>6 sessions                                 | Pain intensity (NRS)                                                                 | Analgesic consumption                                                                                                                                  |
| Ferraz and Moreira, 2009 <sup>122</sup>      | P | E  | Post-op - cardiac surgery                | 20 (6W)    | TENS (HF) = 10                                                                   | Placebo TENS = 10 (0mA)                                                                                    | Fixed<br>1 x 20 mins<br>1 session                                                 | Pain intensity (NRS)                                                                 | Analgesic consumption                                                                                                                                  |
| Ferreira et al., 2011 <sup>123</sup>         | P | E  | Post-op - thoracotomy                    | 30 (12W)   | TENS (HF) + fentanyl / bupivacaine = 15                                          | Placebo TENS (0mA) + fentanyl / bupivacaine = 15                                                           | Fixed<br>1 x 60 mins<br>1 h after epidural on second Post-op day<br><br>1 session | Pain intensity (VAS)<br>• Resting pain<br>• Changing decubitus<br>• Pain on movement | None                                                                                                                                                   |

O8\_OL-TABLE1\_IncludedStudies

|                                         |   |    |                                                |          |                                                    |                                                                                                                                              |                                                                                                 |                                                          |                                                                                                                                                                                                                                                                                                                             |
|-----------------------------------------|---|----|------------------------------------------------|----------|----------------------------------------------------|----------------------------------------------------------------------------------------------------------------------------------------------|-------------------------------------------------------------------------------------------------|----------------------------------------------------------|-----------------------------------------------------------------------------------------------------------------------------------------------------------------------------------------------------------------------------------------------------------------------------------------------------------------------------|
|                                         |   |    |                                                |          |                                                    |                                                                                                                                              |                                                                                                 | • During cough                                           |                                                                                                                                                                                                                                                                                                                             |
| Ferreira et al., 2017 <sup>124</sup>    | P | E  | Temporomandibular disorder – chronic           | 40 (30W) | TENS (LF then HF) = 20                             | Placebo TENS = 20 (current fade away to 0mA after 40s)                                                                                       | Fixed 1 x 50 mins 1 session                                                                     | Pain intensity (VAS)                                     | Pressure pain threshold (algometry)<br>EMG activity                                                                                                                                                                                                                                                                         |
| Finsen et al., 1988 <sup>125</sup>      | P | Pr | Post op - major amputation                     | 51 (24W) | TENS (LF) + analgesics (NR) = 17                   | Placebo TENS + analgesics (NR) = 19 (0mA)<br>Chlorpromazine + placebo TENS (0mA) + analgesics (NR) = 15                                      | Fixed 2 x 30 mins / day x 2 weeks 28 sessions                                                   | No primary outcome                                       | Analgesic consumption<br>Presence of phantom pain (tally of yes or no answers)                                                                                                                                                                                                                                              |
| Fiorelli et al., 2012 <sup>126</sup>    | P | Pr | Post-op - thoracotomy                          | 50 (19W) | TENS (HF) + morphine PCA = 25                      | Placebo TENS + morphine PCA = 25 (0mA)                                                                                                       | Fixed 1 x 30 mins at 4h intervals for first 48h then 2 x 30 mins / day from day 3-5 16 sessions | Pain intensity (VAS)                                     | Analgesic consumption (morphine-PCA)<br>Serum cytokines measurements<br>Respiratory function (FVC, FEV 1)                                                                                                                                                                                                                   |
| Fodor-Sertl et al., 1990 <sup>127</sup> | P | Pr | Post-op - thoracotomy                          | 40 (7W)  | TENS (HF, segmental) + medication = 16             | Placebo TENS (non-segmental, placebo control) + analgesic medication = 18                                                                    | Fixed 15-30 mins 6 post-operative days                                                          | No primary outcomes                                      | Analgesic consumption                                                                                                                                                                                                                                                                                                       |
| Forogh et al., 2019 <sup>128</sup>      | P | Pr | Rehabilitation – following ACL surgery         | 70 (0W)  | TENS (HF) + exercise = 35                          | Exercise (SoC, no TENS) = 35                                                                                                                 | Fixed 1 x 35 mins / day x 5 days / week x 4 weeks 20 sessions                                   | Pain intensity (VAS)                                     | International knee documentation committee (IKDC) questionnaire<br>Range of motion                                                                                                                                                                                                                                          |
| Forst et al., 2004 <sup>129</sup>       | P | Pr | Peripheral diabetic neuropathy                 | 19 (9W)  | TENS (LF) = 12                                     | Placebo TENS = 7 (0mA)                                                                                                                       | PRN >30 mins / day /leg for 12 weeks                                                            | Pain intensity (VAS)                                     | New total symptom score (NTSS = 6)<br>Sensory nerve threshold (temperature, vibration, pain)<br>Neuropathy total symptom score-6 (NTSS - 6)<br>Intensity of dysaesthesia, hypaesthesia and muscle weakness (VAS)<br>Peripheral nerve function – vibration perception and temperature thresholds<br>Microvascular blood flow |
| Forster et al., 1994 <sup>130</sup>     | P | Pr | Post-op - coronary artery bypass graft surgery | 45 (0W)  | TENS (HF) + Analgesics (morphine/paracetamol) = 15 | Placebo TENS Analgesics (morphine/paracetamol) = 15 (0mA)<br>Control Analgesics (morphine/paracetamol), (SoC, no TENS) = 15 (no description) | PRN up to 72 hours post op                                                                      | Pain intensity (NRS)<br>• Resting pain<br>• During cough | Analgesic consumption (Narcotic)                                                                                                                                                                                                                                                                                            |
| Fujii-Abe et al., 2019 <sup>131</sup>   | P | E  | Post op – Wisdom tooth extraction              | 44 (23W) | HF TENS (non-noxious) = 11                         | Placebo TENS (0mA) = 11<br>TENS (noxious, conditioned pain modulation) = 11<br>Combined TENS (non-noxious + noxious) = 11                    | Fixed 1 x 20 mins                                                                               | Pain intensity (VAS)                                     | None                                                                                                                                                                                                                                                                                                                        |
| Galli et al., 2015 <sup>132</sup>       | P | E  | Post-op - nephrectomy                          | 74 (39W) | TENS (HF) + analgesics (unknown) = 37              | Placebo TENS (fading) + analgesics (unknown) = 37                                                                                            | Fixed 1 x 60 mins                                                                               | Pain intensity (NRS)<br>• Resting pain                   | Respiratory muscle strength<br>Pulmonary function<br>Walk function                                                                                                                                                                                                                                                          |

08\_OL-TABLE1\_IncludedStudies

|                                           |   |    |                                               |          |                                                      |                                                                                                                                                                                                           |                                                                                                |                                                                                                                                |                                                                                                                                                             |
|-------------------------------------------|---|----|-----------------------------------------------|----------|------------------------------------------------------|-----------------------------------------------------------------------------------------------------------------------------------------------------------------------------------------------------------|------------------------------------------------------------------------------------------------|--------------------------------------------------------------------------------------------------------------------------------|-------------------------------------------------------------------------------------------------------------------------------------------------------------|
|                                           |   |    |                                               |          |                                                      |                                                                                                                                                                                                           |                                                                                                | <ul style="list-style-type: none"> <li>• During cough</li> <li>• During pulmonary testing</li> <li>• During walking</li> </ul> |                                                                                                                                                             |
| Galloway et al., 1984 <sup>133</sup>      | P | Pr | Post-op - abdominal                           | 40 (30W) | TENS (PRN) + analgesic (Cyclimorph) as required = 14 | No treatment (SoC, no TENS) + analgesic (Cyclimorph) as required = 14<br>TENS + analgesic Ccyclimorph) as required = 12<br>(Remote – non = segmental)                                                     | PRN for 48 hours                                                                               | Pain intensity (VAS, Likert scale)                                                                                             | Analgesic consumption<br>Wound pain discomfort (VAS)                                                                                                        |
| Garcia-Perez et al., 2018 <sup>134</sup>  | P | Pr | Pressure ulcers (injury)                      | 17 (15W) | TENS (HF) + standard wound care = 9                  | Standard wound care (SoC, no TENS) = 8                                                                                                                                                                    | Fixed 1 x 60 mins / day x 3 weeks total<br>20 sessions                                         | No primary outcome                                                                                                             | Pressure injury area<br>Pressure injury healing rate<br>Blood flow in affected lower limb<br>Skin temperature<br>Pain Assessment in Advanced Dementia Scale |
| Gerson et al., 1977 <sup>135</sup>        | C | E  | Post herpetic neuralgia                       | 29 (NR)  | TENS (NR) = 13                                       | Carbamazepine + Clomipramine = 16                                                                                                                                                                         | Fixed 1 x 15 mins / week x 4 weeks then one x 15 mins put 2 weeks x 6 weeks<br>? x 8 weeks too | Pain intensity (VAS).                                                                                                          | Analgesic consumption<br>Plasma concentrations of drugs<br>Physical activity and mental outlook (VAS)                                                       |
| Ghonaime et al., 1999 <sup>136</sup>      | C | E  | Back pain - low                               | 60 (31W) | TENS (LF) + analgesics (non-opioid) as required = 60 | Placebo PENS (0mA) + analgesics as required = =64<br>PENS + analgesics as required = = 64<br>Exercise therapies + analgesics as required = (SoC, no TENS) = 64                                            | Fixed 1 x 30 mins x 3 / week x 3 weeks<br>9 sessions                                           | Pain intensity (VAS)                                                                                                           | Analgesic consumption<br>SF-36<br>Physical component summary<br>Mental component summary<br>Quality of sleep<br>Well-being)                                 |
| Ghonaime et al., 1999 <sup>137</sup>      | C | E  | Back pain - Sciatica                          | 64 (34W) | TENS (LF) + analgesics (non-opioid) as required = 64 | Placebo PENS + analgesics as required (0mA) = 64<br>PENS + analgesics as required = 64                                                                                                                    | Fixed 1 x 30 mins / day x 3 weeks<br>21 sessions                                               | Pain intensity (VAS)                                                                                                           | Analgesic consumption<br>SF-36<br>Physical activity and quality of sleep during the 24 h interval prior to each treatment session (VAS)                     |
| Gilbert et al., 1986 <sup>138</sup>       | P | Pr | Post-op - inguinal hemiorrhaphy               | 40 (0W)  | TENS (HF) + Pethidine as required = 20               | Placebo TENS + Pethidine as required = 20 (0mA)                                                                                                                                                           | PRN                                                                                            | Pain intensity (VAS)                                                                                                           | Analgesic consumption (Pethidine)<br>Expiratory peak flow                                                                                                   |
| Grabiańska et al., 2015 <sup>139</sup>    | P | Pr | Back pain low                                 | 60 (NR)  | TENS (HF) = 30                                       | IFT = 30                                                                                                                                                                                                  | Fixed 10 x 20 mins / day                                                                       | Pain intensity (VAS)                                                                                                           | Laitinen Pain Questionnaire                                                                                                                                 |
| Graff-Radford et al., 1989 <sup>140</sup> | P | E  | Myofascial pain and trigger point sensitivity | 60 (45W) | TENS (HF) = 12                                       | Sham Control (Stadynamics unit or Pain Suppressor unit. 0mA). = 12<br>TENS (LF, 2hz, 250us, >MDT) = 12<br>TENS (HF, 50us, SBC) = 12<br>TENS (Pain Suppressor, 4mA, 15Hz burst of 20Khz ,active <SDT) = 12 | Fixed 1 x 30 mins<br>1 session                                                                 | Pain intensity (VAS)                                                                                                           | Pressure algometry                                                                                                                                          |
| Grant et al., 1999 <sup>141</sup>         | P | E  | Back pain                                     | 60 (54W) | TENS (HF) = 28                                       | Acupuncture = 32                                                                                                                                                                                          | PRN                                                                                            | Pain intensity (VAS)                                                                                                           | Analgesic consumption<br>Pain subscale of Nottingham Health Profile                                                                                         |

08\_OL-TABLE1\_IncludedStudies

|                                            |   |    |                                                      |            |                                          |                                                                                                                  |                                                                                         |                                                  |                                                                                                                                                                                                                           |
|--------------------------------------------|---|----|------------------------------------------------------|------------|------------------------------------------|------------------------------------------------------------------------------------------------------------------|-----------------------------------------------------------------------------------------|--------------------------------------------------|---------------------------------------------------------------------------------------------------------------------------------------------------------------------------------------------------------------------------|
|                                            |   |    |                                                      |            |                                          |                                                                                                                  | 1 x <30 mins / session and < 6h / day for 4 weeks                                       |                                                  | Spinal flexion measured from C7 to S1                                                                                                                                                                                     |
| Gregorini et al., 2010 <sup>142</sup>      | P | E  | Post-op - cardiac surgery                            | 25 (7W)    | TENS (HF) = 13                           | Placebo TENS (>SDT – infrequent pulses) = 12                                                                     | Fixed<br>1 x 4 hours ?? on 3rd post-op day                                              | Pain intensity (VAS)                             | Respiratory muscle strength<br>Lung volumes and capacity                                                                                                                                                                  |
| Grimmer, 1992 <sup>143</sup>               | P | E  | Osteoarthritis - knee                                | 60 (37W)   | TENS (HF) = 20                           | Placebo TENS = 20 (0mA)<br>TENS (LF, burst) = 20                                                                 | Fixed<br>1 x 30 mins<br>1 session                                                       | Pain intensity (VAS)                             | Stiffness change (VAS)<br>Pain relief time (in hours)<br>Stiffness relief time (hours)<br>Change on knee circumference<br>Change in knee range of motion<br>Physiological respiratory rate, heart rate and blood pressure |
| Gschiel et al., 2010 <sup>144</sup>        | P | Pr | Osteoarthritis – knee (gonarthrosis)                 | 45 (32W)   | TENS (AF) = 25                           | Placebo TENS (0mA) = 20                                                                                          | PRN<br>>2 x 30 mins / day for 3-weeks                                                   | Pain intensity (VAS)                             | SF-36<br>WOMAC<br>Lysholm score                                                                                                                                                                                           |
| Gunay Ucurum et al., 2018 <sup>145</sup>   | P | Pr | Shoulder impingement syndrome                        | 79 (65W)   | TENS (NR) + exercise = 20                | Exercise (SoC, no TENS) = 19<br>IFT + Exercise = 20<br>US + Exercise = 20                                        | Fixed<br>1 x ?? mins x 3 / week x 4 weeks<br>12 sessions                                | Pain intensity (VAS)                             | Short Form-36 (SF-36)<br>Disabilities of the Arm, Shoulder and Hand questionnaire (DASH)                                                                                                                                  |
| Guo and Jia, 2005 <sup>146</sup>           | P | Pr | Fibromyalgia                                         | 66 (45W)   | TENS (HF) = 22                           | Routine medication (SoC, no TENS) = 22<br>EA = 22                                                                | Fixed<br>1 x 30 mins / day for 20 days [repeated for another 20 days]<br>?? 40 sessions | Pain intensity (VAS)                             | Analgesic consumption                                                                                                                                                                                                     |
| Hamza et al., 1999 <sup>147</sup>          | P | Pr | Post-op - gynaecological                             | 100 (100W) | TENS (HF) + morphine PCA = 25            | Placebo TENS + morphine PCA = 25 (0mA)<br>TENS (LF) + morphine PCA = 25<br>TENS (AF) + morphine PCA = 25         | Fixed<br>1 x 30 mins at intervals of 2 h or longer while patient awake                  | Pain intensity (VAS)                             | Analgesic consumption (PCA morphine)<br>levels of sedation, fatigue, discomfort and nausea                                                                                                                                |
| Hanfny and El-Bigawy, 2004 <sup>148</sup>  | P | Pr | Dysmenorrhea – primary                               | 30 (30W)   | TENS (HF) = 15                           | Acupressure = 15                                                                                                 | Fixed<br>1 x 20 mins x 3 days x 3 menstrual cycles                                      | Pain intensity (6-point scale)                   | Pain relief (5-point scale)                                                                                                                                                                                               |
| Hansson and Ekblom, 1983 <sup>149</sup>    | C | E  | Orofacial pain – acute                               | 62 (36W)   | TENS (HF) = 22                           | Placebo TENS (0mA) = 20<br>TENS (LF, burst) = 20                                                                 | Fixed<br>1 x 30 mins<br>1 session                                                       | Pain intensity (5-point verbal scale)            | None                                                                                                                                                                                                                      |
| Hansson et al., 1986 <sup>150</sup>        | P | E  | Post-op - oral                                       | 28 (16W)   | TENS (HF) + naloxone = 6                 | TENS (LF, burst) + naloxone = 7<br>Vibration + Naloxone = 7<br>Naloxone = 8                                      | Fixed<br>1 x 45 mins<br>1 session                                                       | Pain intensity (5-point verbal scale)            | None                                                                                                                                                                                                                      |
| Hargreaves and Lander, 1989 <sup>151</sup> | P | E  | Post-op dressing changes following abdominal surgery | 75 (34W)   | TENS (HF) + meperidine and morphine = 25 | Placebo TENS (0mA) + meperidine and morphine = 25<br>No treatment (+ meperidine and morphine, SoC, no TENS) = 25 | Fixed<br>1 x 15 to 60 mins depending on duration of dressing change<br>1 session        | Pain intensity (VAS)<br>• During dressing change | Analgesic consumption (prescription and administration)                                                                                                                                                                   |
| Harrison et al., 1986 <sup>152</sup>       | P | Pr | Labour pain                                          | 150 (150W) | TENS (HF+LF burst) = 76                  | Placebo TENS = 73 (0mA)                                                                                          | PRN<br>During labour                                                                    | Pain intensity (5-point scale)                   | Analgesic consumption<br>Hours pf labour<br>Mode of delivery<br>Pain relief reported by the midwife (5-point scale)                                                                                                       |



08\_OL-TABLE1\_IncludedStudies

|                                           |   |    |                                                         |           |                                                               |                                                                                                                                                                                                                                                                                                                                      |                                                              |                                                                  |                                                                                                                                                                                                                                                      |
|-------------------------------------------|---|----|---------------------------------------------------------|-----------|---------------------------------------------------------------|--------------------------------------------------------------------------------------------------------------------------------------------------------------------------------------------------------------------------------------------------------------------------------------------------------------------------------------|--------------------------------------------------------------|------------------------------------------------------------------|------------------------------------------------------------------------------------------------------------------------------------------------------------------------------------------------------------------------------------------------------|
| Hart et al., 2012 <sup>153</sup>          | P | Pr | Rehabilitation - Anterior cruciate ligament             | 30 (10W)  | TENS (HF) + exercise = 10                                     | Exercise alone (SoC, no TENS) = 10<br>Cryotherapy + Exercise = 10                                                                                                                                                                                                                                                                    | PRN<br>Daily x 2 weeks and during in clinic exercise session | Pain intensity (VAS)                                             | Various functional outcomes for knee<br>Tegner activity rating<br>International Knee Documentation Committee subjective knee evaluation form.<br>Circumferential girth (measured at mid-patella)<br>Range of motion<br>Quadriceps central activation |
| Hazneci et al., 2005 <sup>154</sup>       | P | Pr | CRPS - reflex sympathetic dystrophy syndrome upper limb | 30 (0W)   | TENS (HF) +, contrast bathing and exercise programme = 16     | Pulsed US on stellate ganglion + contrast bathing and exercise programme = 14                                                                                                                                                                                                                                                        | Fixed<br>1 x 20 mins / day for 3 weeks<br>21 sessions        | Pain intensity (???)<br>• spontaneous pain<br>• provocative pain | Loss of mobility, muscle power<br>Oedema                                                                                                                                                                                                             |
| Herrera-Lasso et al., 1993 <sup>155</sup> | P | Pr | Shoulder – painful syndrome                             | 29 (23W)  | TENS (HF) + Exercises + Heat (superficial) = 15               | US + Exercises + Heat (superficial) = 14                                                                                                                                                                                                                                                                                             | Fixed<br>1 x 20 mins / day x 2-5 / week<br>13 sessions       | Pain intensity (VAS)                                             | Range of motion                                                                                                                                                                                                                                      |
| Hershman, 1989 <sup>156</sup>             | P | Pr | Post op - colorectal or cholecystectomy                 | 95 (47W)  | TENS (HF) + omnopon (opiate) = 48                             | Placebo TENS + omnopon (opiate) (0mA) = 47                                                                                                                                                                                                                                                                                           | PRN<br>48h post-operative                                    | No primary outcome                                               | Analgesic consumption - Opiate<br>Anti- emetic consumption<br>Duration of hospital stay                                                                                                                                                              |
| Hokenek et al., 2020 <sup>157</sup>       | P | Pr | Migraine – presenting to emergency department           | 83 (NR)   | TENS (HF) + rescue medication = 39                            | Placebo TENS (0mA) + rescue medication = 39                                                                                                                                                                                                                                                                                          | Fixed<br>1 x 20mins                                          | Pain intensity (VAS)                                             | Analgesic consumption                                                                                                                                                                                                                                |
| Hou et al., 2002 <sup>158</sup>           | P | E  | Cervical Myofascial Pain and Trigger Point Sensitivity  | 71 (59W)  | TENS (HF) + hot pack active ROM + stretch with spray (B5) = 9 | Hot pack + active ROM + stretch with spray (SoC, no TENS) (B4) = 10<br>Ischemic compression + TENS (HF) + hot pack + active range of motion + = 9<br>Hot pack + active range of motion + ischemic compression = 12<br>Hot pack + active range of motion = 21<br>IFT+ myofascial release + Hot pack + active range of motion (B6) = 9 | Fixed<br>1 x 20 mins<br>1 session                            | Pain intensity (VAS)                                             | Pressure pain threshold and tolerance (algometry)<br>Range of motion                                                                                                                                                                                 |
| Hruby et al., 2006 <sup>159</sup>         | P | Pr | Procedure pain - Office-based flexible cystoscopy       | 148 (40W) | TENS (HF) = 48                                                | Placebo TENS (0mA) = 49<br>No treatment (no analgesics) = 51                                                                                                                                                                                                                                                                         | Fixed<br>< 5min During procedure<br>1 session                | Pain intensity (VAS)                                             | International Prostate Symptom Score questionnaire<br>Changes in vital signs and IPSS                                                                                                                                                                |
| Hsieh and Lee, 2002 <sup>160</sup>        | P | E  | Back pain - chronic low non-specific                    | 133 (89W) | TENS + Medication = 49                                        | Medication - Diclofenac (NSAID), mephenoxalone (muscle relaxant) and antacid (SoC, no TENS) = 31<br>PENS + medication = 53                                                                                                                                                                                                           | Fixed<br>1 x 15 mins<br>1 session                            | Pain intensity (VAS)                                             | Pain drawing instrument<br>Pressure pain threshold (algometry)<br>Quebec Back Pain Disability scale                                                                                                                                                  |
| Hsueh et al., 1997 <sup>161</sup>         | P | E  | Myofascial trigger points                               | 60 (35W)  | TENS (HF) = 20                                                | Placebo electrotherapy (0mA) = 18                                                                                                                                                                                                                                                                                                    | Fixed<br>1 x 20 mins                                         | Pain intensity (VAS)                                             | Pressure algometry (pain threshold)                                                                                                                                                                                                                  |

O8\_OL-TABLE1\_IncludedStudies

|                                        |   |    |                                                   |            |                                                             |                                                                                                                           |                                                                               |                                                              |                                                                                                                                                                                                                                                         |
|----------------------------------------|---|----|---------------------------------------------------|------------|-------------------------------------------------------------|---------------------------------------------------------------------------------------------------------------------------|-------------------------------------------------------------------------------|--------------------------------------------------------------|---------------------------------------------------------------------------------------------------------------------------------------------------------------------------------------------------------------------------------------------------------|
|                                        |   |    |                                                   |            |                                                             | Functional electrical muscle stimulation = 22                                                                             | 1 session                                                                     |                                                              | Range of motion                                                                                                                                                                                                                                         |
| Hughes et al., 1988 <sup>162</sup>     | P | Pr | Labour pain                                       | 89 (89W)   | TENS (NR) + opioids rescue = 29                             | Placebo TENS (0mA) + opioids rescue = 30<br>Conventional medication, opioids (SoC, no TENS) = 30                          | PRN<br>24h                                                                    | Pain intensity (VAS)                                         | Analgesic consumption<br>Pain relief (5-point category rank scale)<br>Infant condition<br>Apgar                                                                                                                                                         |
| Husch et al., 2020 <sup>163</sup>      | P | Pr | Post op - thoracotomy                             | 45 (25W)   | TENS (HF) + physiotherapy + analgesics = 15                 | Placebo TENS (fading to 0mA) + physiotherapy + analgesics = 15<br>Control (SoC, physiotherapy) + analgesics = 15          | Fixed<br>3 x 30 mins / day x 2 days<br>6 sessions                             | Pain intensity (VAS)                                         | Analgesic consumption<br>Pulmonary function, respiratory muscle strength                                                                                                                                                                                |
| Ilhanli, 2015 <sup>164</sup>           | P | Pr | chronic low back pain with lumbar disc herniation | 160 (108W) | Conventional TENS (HF)<br>Hot pack, ultrasound and exercise | Group1= Group2= Acupuncture-like TENS, Group3= Brief-intense TENS, Group4= Sham TENS.                                     | Fixed<br>5 days/week for 3 weeks                                              | Pain intensity (VAS)<br><br>Rest Movement                    | Ostwestry<br>Low Back Pain Disability Questionnaire<br>Short-Form 36 physical component<br>Mental component Scores<br>Modified Lumbar Schober test, Straight Leg Raising test and Femoral Stretching test                                               |
| Inal et al., 2016 <sup>165</sup>       | P | Pr | Osteoarthritis - knee                             | 90 (90W)   | TENS (HF) + physiotherapy (hot pack, US, exercise) = 30     | Placebo TENS (0mA) + physiotherapy (hot pack, US, exercise) = 30<br>TENS (LF) physiotherapy (hot pack, US, exercise) = 30 | Fixed<br>1 x 20 mins / day x 5 weeks<br>35 sessions                           | Pain intensity (VAS)<br>• Resting pain<br>• Pain on movement | WOMAC<br>Walking speed (50 metres)<br>Climbing stairs speed (ten stairs)                                                                                                                                                                                |
| Isik et al., 2017 <sup>166</sup>       | P | Pr | Osteoarthritis - knee                             | 105 (80W)  | TENS (HF) = 53                                              | Leech therapy = 52                                                                                                        | Fixed<br>1 x 20min / day x 5 days / week x 3 weeks (in clinic)<br>15 sessions | Pain intensity (VAS)                                         | WOMAC                                                                                                                                                                                                                                                   |
| Jaafarpour et al., 2008 <sup>167</sup> | P | Pr | Post-op - caesarean                               | 108 (108W) | TENS (MF) = 54                                              | Placebo TENS (0mA) = 54                                                                                                   | PRN<br>24h continuous                                                         | Pain intensity (VAS)                                         | Analgesic consumption                                                                                                                                                                                                                                   |
| Jamison et al., 2019 <sup>168</sup>    | P | Pr | Back pain - chronic low non-specific              | 68 (41W)   | TENS (HF) = 35                                              | Usual treatment (SoC, no TENS) = 33                                                                                       | PRN<br>daily x 3 months                                                       | Pain intensity (NRS)<br>• Current pain<br>• Average pain     | Pressure algometry (PPT)<br>Quantitative sensory testing<br>Anxiety, depression, and irritability (NRS)<br>Brief Pain Inventory<br>Pain Disability Inventory (PDI)<br>Pain Catastrophizing Scale (PCS)<br>Hospital Anxiety and Depression Scale (HADS). |
| Jarzem et al., 2005 <sup>169</sup>     | C | E  | Back pain - chronic low non-specific              | 50 (21W)   | TENS (NR, conventional) = 25                                | Placebo TENS (0mA) = 25                                                                                                   | Fixed<br>3 x 20 mins<br>3 sessions                                            | Pain intensity (VAS)                                         | Range of motion<br>Straight leg raising<br>Sit-ups and oblique sit-ups                                                                                                                                                                                  |
| Jensen et al., 1985 <sup>170</sup>     | P | Pr | Arthroscopic knee surgery                         | 90 (18W)   | TENS (HF) = 30                                              | Placebo TENS (0mA) = 30<br>Analgesic (SoC, no TENS control) = 30                                                          | PRN<br>< 7 days - discontinuation day measured                                | Pain intensity (6-point category scale)                      | Analgesic consumption<br>Medicine rating<br>Range of motion<br>Isokinetic muscle examination<br>Leg volume                                                                                                                                              |

08\_OL-TABLE1\_IncludedStudies

|                                              |   |    |                                                                                                                                                                                   |                                        |                                                                 |                                                                                                                                                                                                                           |                                                                 |                                                                                                               |                                                                                                                                                                           |
|----------------------------------------------|---|----|-----------------------------------------------------------------------------------------------------------------------------------------------------------------------------------|----------------------------------------|-----------------------------------------------------------------|---------------------------------------------------------------------------------------------------------------------------------------------------------------------------------------------------------------------------|-----------------------------------------------------------------|---------------------------------------------------------------------------------------------------------------|---------------------------------------------------------------------------------------------------------------------------------------------------------------------------|
| Jensen et al., 1991 <sup>171</sup>           | P | Pr | Osteoarthritis - knee                                                                                                                                                             | 20 (18W)                               | TENS (HF) = 10                                                  | TENS (LF) = 10                                                                                                                                                                                                            | Fixed<br>1 x 30 mins / day x 5<br>days<br>5 sessions            | Pain intensity (4-<br>point Likert scale)<br>• Resting pain<br>• Pain on<br>movement<br>• Exercise<br>induced | Analgesic consumption (NSAID)                                                                                                                                             |
| Jones and Hutchinson,<br>1991 <sup>172</sup> | C | E  | Post-op pain –<br>abdominal                                                                                                                                                       | 31 (16W)                               | TENS (HF, Para incision) +<br>physiotherapy = 31                | Placebo TENS ('modified placebo'<br>remote site, leg) + physiotherapy =<br>31<br>Entonox + physiotherapy = 31                                                                                                             | Fixed<br>1 x 20 mins<br>1 session                               | Pain intensity<br>(VAS)                                                                                       | Respiratory function<br>Peak expiratory flow rate                                                                                                                         |
| Kara et al., 2011 <sup>173</sup>             | P | Pr | Post-op spinal surgery                                                                                                                                                            | 54 (28W)                               | TENS (AF,) + Meperidine<br>PCA = 25                             | Meperidine PCA (SoC, no TENS<br>control) = 29                                                                                                                                                                             | Fixed<br>2 x 30-<br>40 mins with a 3 to<br>4-hour rest interval | Pain intensity<br>(VAS)<br>• Resting pain<br>• Pain on<br>movement                                            | Analgesic consumption<br>Beck Depression Inventory<br>Timed Up and Go (TUG) test                                                                                          |
| Kararmaz et al., 2004 <sup>174</sup>         | P | Pr | Procedural pain -<br>during extracorporeal<br>shock wave lithotripsy                                                                                                              | 66 (42W)                               | TENS (HF, conventional) =<br>22                                 | Placebo TENS (active, <SDT) = 22<br>TENS (LF, acupuncture-like) = 22                                                                                                                                                      | Fixed<br>~45-60mins<br>throughout the<br>procedure<br>1 session | Pain intensity<br>(VAS)                                                                                       | Analgesic consumption<br>(Alfentanil)<br>Nausea and vomiting (tally of<br>yes/no)<br>Aldrete score<br>Patients' satisfaction (4-point<br>scale)                           |
| Kayman-Kose et al.,<br>2014 <sup>175</sup>   | P | E  | Post-partum pain<br>following<br>(a) Caesarean section –<br>post operative pain +<br>uterine contractions<br>(b) Vaginal delivery –<br>post trauma pain +<br>uterine contractions | (a) = 50<br>(50W)<br>(b) = 50<br>(50W) | (a) TENS (HF) = 50<br>(b) TENS (HF) = 50                        | (a) Placebo TENS (0mA) = 50<br>(b) Placebo TENS (0mA) = 50                                                                                                                                                                | Fixed<br>1 x 30min<br>1 session                                 | Pain intensity<br>(VAS and verbal<br>rating scale)                                                            | Analgesic consumption                                                                                                                                                     |
| Keskin et al., 2012 <sup>176</sup>           | P | Pr | Back pain – low,<br>pregnancy-related                                                                                                                                             | 79 (79W)                               | TENS (HF) = 20                                                  | Control group (no treatment<br>control) = 21<br>Exercise (SoC) = 19<br>Acetaminophen = 19                                                                                                                                 | 2 x ? mins / week x<br>3 weeks                                  | Pain intensity<br>(VAS)                                                                                       | Roland Morris Disability<br>Questionnaire                                                                                                                                 |
| Kibar et al., 2020 <sup>177</sup>            | P | Pr | Back pain - chronic low<br>non-specific                                                                                                                                           | 123<br>(87W)                           | TENS (HF) + hot pack +<br>exercise + rescue<br>paracetamol = 31 | Placebo TENS (Sham TENS/IFT<br>device, 0mA) + hot pack + exercise<br>+ rescue paracetamol = 30<br>IFT + hot pack + exercise + rescue<br>paracetamol = 30<br>TENS + IFT + hot pack + exercise<br>+ rescue paracetamol = 32 | 1 x 30 mins / day x 5<br>/ week x 3 weeks<br>15 sessions        | Pain intensity<br>(VAS)<br>• During activity                                                                  | Lumbar range of motion (ROM)<br>via inclinometer and modified<br>Schober test, patient<br>and physician global assessments.<br>Rolland-Morris Disability<br>Questionnaire |
| Kim et al., 2012 <sup>178</sup>              | P | E  | Pain during venous<br>cannulation                                                                                                                                                 | 100<br>(60W)                           | TENS (HF) = 50                                                  | Placebo TENS (0mA) = 50                                                                                                                                                                                                   | Fixed<br>1 x 20 min before<br>cannulation<br>1 session          | Pain intensity<br>(NRS)                                                                                       | Adverse effects                                                                                                                                                           |
| Kim et al., 2014 <sup>179</sup>              | P | Pr | Myofascial pain<br>syndrome<br>Mixed                                                                                                                                              | 99 (86W)                               | TENS (NR) + Ketoprofen<br>(NSAID) patch = 24                    | Ketoprofen (NSAID) patch (SoC) =<br>25                                                                                                                                                                                    | Fixed<br>2 x 20 mins / day x 2<br>weeks                         | Pain intensity<br>(NRS)                                                                                       | Active range of motion<br>Pressure pain threshold<br>(algometry)                                                                                                          |

O8\_OL-TABLE1\_IncludedStudies

|                                       |   |    |                                      |            |                                    |                                                                                                   |                                                                                 |                                                                                                                                          |                                                                                                                                                      |
|---------------------------------------|---|----|--------------------------------------|------------|------------------------------------|---------------------------------------------------------------------------------------------------|---------------------------------------------------------------------------------|------------------------------------------------------------------------------------------------------------------------------------------|------------------------------------------------------------------------------------------------------------------------------------------------------|
|                                       |   |    |                                      |            |                                    | Heating pad + ketoprofen (NSAID) patch = 25<br>Topical capsaicin + ketoprofen (NSAID) patch = 25  | 28 sessions                                                                     |                                                                                                                                          | Neck Disability Index (NDI)<br>Safety                                                                                                                |
| Kirupa et al., 2019 <sup>180</sup>    | P | Pr | Temporomandibular joint              | 30 (NR)    | TENS (HF) = 15                     | Ultrasound = 15                                                                                   | Fixed<br>1 x 15 mins / day x unclear /week x 4 weeks<br>? 10 sessions           | Pain intensity (VAS)                                                                                                                     | None                                                                                                                                                 |
| Knobel et al., 2005 <sup>181</sup>    | P | Pr | Labour pain                          | 60 (60W)   | TENS (HF, 'tablet electrode') = 20 | Placebo TENS (0mA) = 20<br>TENS using silver spike point electrode = 20                           | PRN<br>1 x 120 mins                                                             | Pain intensity (VAS)                                                                                                                     | Analgesic consumption<br>Epidural analgesia<br>Pain relief (calculated from pain intensity (VAS)<br>Discomfort (NR)                                  |
| Koca et al., 2014 <sup>182</sup>      | P | Pr | Carpal tunnel syndrome               | 75 (43W)   | TENS (HF) = 25                     | IFT= 25<br>Splint therapy = 25                                                                    | Fixed<br>1 x 20 mins / day x 5 days / week x 3 weeks<br>15 sessions             | Pain intensity (VAS)                                                                                                                     | Symptom severity scale<br>BCTQ<br>Neurophysiology (median motor nerve latency and sensory nerve conduction velocity)                                 |
| Kofotolis et al., 2008 <sup>183</sup> | P | Pr | Back pain - chronic low non-specific | 92 (92W)   | TENS (LF) = 23                     | Placebo TENS (0mA) = 23<br>Rhythmic stabilisation = 23<br>TENS (LF) + Rhythmic stabilisation = 23 | Fixed<br>1 x 40-45 mins x 5 days/week x 4 weeks<br>20 sessions                  | Pain intensity (VAS/BORG)                                                                                                                | Physical activity questionnaire<br>Oswestry Low Back Pain Disability Questionnaire<br>Range of motion<br>Flexion and extension trunk endurance tests |
| Koke et al., 2004 <sup>184</sup>      | C | Pr | Chronic pain                         | 180 (116W) | TENS (HF, HI, >SDT) = 62           | Control (HF, intensity of choice) = 60<br>TENS (HF, LI, SDT) = 58                                 | PRN<br>30 mins (HI) or 60 mins (LI) 4 to 6 times / day x 2 weeks<br>56 sessions | Pain intensity (VAS)                                                                                                                     | Desire to continue (TENS continuation questionnaire)                                                                                                 |
| Korkmaz et al., 2010 <sup>185</sup>   | P | Pr | Shoulder pain                        | 40 (28W)   | TENS (HF) + exercise = 20          | Pulsed radiofrequency + exercise = 20                                                             | Fixed<br>1 x 20 mins /day x 5 / week<br>20 sessions                             | Pain intensity (VAS)<br>• Resting pain (maximum and mean)<br>• Pain on movement (maximum and mean)<br>• Pain at night (maximum and mean) | Range of motion<br>Shoulder Pain and Disability Index<br>SF-36                                                                                       |
| Kumar and Raju, 2014 <sup>186</sup>   | P | Pr | Tension-type headache                | 36 (20W)   | TENS (LF) = 17                     | Exercises - Progressive muscular relaxation (SoC) = 19                                            | Fixed<br>1 x 15 mins / day x 7 days<br>7 sessions                               | Pain intensity (VAS)                                                                                                                     | Lakaev Academic Stress Response Scale                                                                                                                |
| Labrecque et al., 1999 <sup>187</sup> | P | E  | Labour pain (Low back pain)          | 34 (34W)   | TENS (HF) = 12                     | Standard care (massage, whirlpool bath, mobilisation, SoC, no TENS) = 12                          | PRN<br>During labour                                                            | Pain intensity (VAS)                                                                                                                     | Analgesic consumption (narcotics)<br>Pain unpleasantness (VAS)<br>Labour Agency Scale (LAS)                                                          |

08\_OL-TABLE1\_IncludedStudies

|                                            |   |    |                                                         |              |                                                            | Intracutaneous sterile water injections (as a treatment) = 11                                                                    |                                                                |                                                                     | Labour and Delivery Satisfaction Index                                                                           |
|--------------------------------------------|---|----|---------------------------------------------------------|--------------|------------------------------------------------------------|----------------------------------------------------------------------------------------------------------------------------------|----------------------------------------------------------------|---------------------------------------------------------------------|------------------------------------------------------------------------------------------------------------------|
| Laitinen and Nuutinen, 1991 <sup>188</sup> | P | Pr | Post-op cholecystectomy                                 | 60 (53W)     | TENS (HF) + Indomethacin = 20                              | Control opioid analgesics (SoC, no TENS or Indomethacin) = 10<br>Indomethacin = 10<br>TENS (LF) + Indomethacin = 20              | Unclear<br>> 16 hours                                          | Pain intensity (4 point categorical)                                | Analgesic consumption (Opioid)<br>Blood pressure<br>Heart rate<br>Respiratory frequency<br>Reported side effects |
| Lang et al., 2007 <sup>189</sup>           | P | Pr | Acute Posttraumatic hip pain during emergency transport | 101 (58W)    | TENS (HF) = 30                                             | Placebo TENS (0mA) = 33                                                                                                          | Fixed<br>~30 mins throughout transport to hospital             | Pain intensity (VAS)                                                | Anxiety (VAS)<br>Morphometric characteristics                                                                    |
| Langley et al., 1984 <sup>190</sup>        | P | E  | Rheumatoid arthritis (hand) + chronic pain (hand)       | 33 (24W)     | TENS (HF) = 11                                             | Placebo TENS (0mA) = 11<br>TENS (LF, acupuncture -like) = 11                                                                     | Fixed<br>1 x 20 mins<br>1 session                              | Pain intensity (VAS)<br>• Resting pain<br>• Pain on movement (grip) | Pressure algometry (joint tenderness)<br>Grip strength                                                           |
| Lauretti et al., 2013 <sup>191</sup>       | P | Pr | Fibromyalgia                                            | 39 (34W)     | TENS (AF, single device) + placebo TENS device = 13        | Placebo TENS (0mA, 2 devices) = 10<br>TENS (AF, two devices) = 13                                                                | Fixed<br>1 x 20min every 12 h x 7 days                         | Pain intensity (VAS)                                                | Analgesic consumption<br>Quality of sleep and fatigue                                                            |
| Lauretti et al., 2015 <sup>192</sup>       | P | Pr | Dysmenorrhea                                            | 40 (40W)     | TENS (Alternating between HF continuous, LF burst) = 20    | Placebo TENS (0mA) = 20                                                                                                          | Fixed<br>1 x 30mins at 8 h interval x 7 days<br>~14 sessions   | Pain intensity (VAS)                                                | Analgesic consumption (Diclofenac)<br>Quality of life questionnaire                                              |
| Law and Cheing, 2004 <sup>193</sup>        | P | Pr | Osteoarthritis - knee                                   | 34 (unclear) | TENS (HF) = 12                                             | Placebo TENS (0mA) = 10<br>TENS (LF) = 13<br>TENS (AF 2/100pps) = 13                                                             | Fixed<br>1 x 40 mins / day x 5 / week x 2 weeks<br>10 sessions | Pain intensity (VAS)<br>• Pain on movement                          | Range of motion<br>Time-up-and-Go                                                                                |
| Law et al., 2004 <sup>194</sup>            | P | Pr | Osteoarthritis - knee                                   | 39 (37W)     | TENS (HF) = 22                                             | Placebo TENS (0mA) = 17                                                                                                          | Fixed<br>1 x 40 mins / day x 5 days x 2 weeks<br>10 sessions   | Pain intensity (VAS)<br>• Pain on movement                          | Range of motion<br>Timed-up-and-Go                                                                               |
| Leandri et al., 1990 <sup>195</sup>        | P | Pr | Post stroke - Hemiplegic shoulder pain                  | 60 (44W)     | TENS (HF) = 20                                             | Placebo TENS (0mA) = 20<br>TENS (HF, LI) = 20                                                                                    | Fixed<br>3 days week x 4 weeks<br>12 sessions                  | No primary outcome                                                  | Range of motion - pain free                                                                                      |
| Lee et al., 1990 <sup>196</sup>            | P | Pr | Labour pain                                             | 125 (125W)   | TENS (HF continuous, LF burst) + analgesics on demand = 58 | Placebo TENS (0mA) + analgesics on demand = 33<br>No treatment (pethidine injections and Entonox inhalation) (SoC, no TENS) = 34 | PRN<br>During labour                                           | Pain intensity (NRS)                                                | Analgesic consumption<br>Pain interval<br>TENS satisfaction questionnaire                                        |
| Lee et al., 2015 <sup>197</sup>            | P | Pr | Post-op Colle's fracture                                | 36 (NR)      | TENS (HF) = 18                                             | Placebo TENS (0mA) = 18                                                                                                          | Fixed<br>1 x 15min / day x 5 days                              | Pain intensity (VAS)                                                | Analgesic consumption (PCS morphine and Cataflan)                                                                |
| Lee et al., 2019 <sup>198</sup>            | C | E  | Cancer pain - head and neck                             | 41 (6W)      | TENS (HF) = 40                                             | Placebo TENS (fading) = 40<br>No treatment = 40                                                                                  | Fixed<br>1 x 30 mins x 1 / week<br>1 session                   | Pain intensity (VAS)                                                | McGill Pain Questionnaire<br>Perception of TENS effectiveness (VAS)<br>Oral function tasks<br>Fatigue (VAS)      |
| Leo et al., 1986 <sup>199</sup>            | C | E  | Mixed pain                                              | 192 (NR)     | TENS (HF, 60pps, 250us, tolerance) = 16                    | TENS (HF, 60pps, 50us, tolerance) = 16                                                                                           | Fixed<br>1 x 30 mins<br>1 session                              | Pain intensity (VAS)                                                | None                                                                                                             |

08\_OL-TABLE1\_IncludedStudies

|                                             |   |    |                                                    |           |                                                            |                                                                                                                                                                                                                                                                                                                                                                                     |                                                           |                                                                |                                                                                                                                           |
|---------------------------------------------|---|----|----------------------------------------------------|-----------|------------------------------------------------------------|-------------------------------------------------------------------------------------------------------------------------------------------------------------------------------------------------------------------------------------------------------------------------------------------------------------------------------------------------------------------------------------|-----------------------------------------------------------|----------------------------------------------------------------|-------------------------------------------------------------------------------------------------------------------------------------------|
|                                             |   |    |                                                    |           |                                                            | TENS (HF, 60pps, 250us, <SDT) = 16<br>TENS (HF, 60pps, 50us, <SDT) = 16<br>TENS (HF, 60pps, 250us, SDT) = 16<br>TENS (HF, 60pps, 50us, SDT) = 16<br>TENS (LF, 3pps, 250us, tolerance) = 16<br>TENS (LF, 3pps, 50us, tolerance) = 16<br>TENS (LF, 3pps, 250us, SDT) = 16<br>TENS (LF, 3pps, 50us, SDT) = 16<br>TENS (LF, 3pps, 250us, <SDT) = 16<br>TENS (LF, 3pps, 50us, <SDT) = 16 |                                                           |                                                                |                                                                                                                                           |
| Leonard et al., 2011 <sup>200</sup>         | C | E  | Chronic pain - various                             | 23 (15W)  | TENS (HF, conventional) = 23                               | TENS (LF, acupuncture-like) = 23                                                                                                                                                                                                                                                                                                                                                    | Fixed<br>1 x 25 mins<br>1 session                         | Pain intensity (NRS)                                           | Pain unpleasantness (NRS)<br>The Patient Global Impression of Change (PGIC) scale                                                         |
| Lewers et al., 1989 <sup>201</sup>          | P | E  | Dysmenorrhea - primary                             | 21 (21W)  | TENS (LF, acupuncture-like) = 10                           | Placebo pill = 11                                                                                                                                                                                                                                                                                                                                                                   | Fixed<br>1 x 30 mins<br>1 session                         | Pain intensity (VAS)                                           | McGill Pain Questionnaire<br>Pain rating index                                                                                            |
| Lewis et al., 1984 <sup>202</sup>           | C | E  | Osteoarthritis - knee                              | 30 (22W)  | TENS (HF) = 30                                             | Placebo TENS (0mA) = 30                                                                                                                                                                                                                                                                                                                                                             | Fixed<br>3 x 30-60 mins / day<br>x 3 weeks<br>21 sessions | Pain intensity (VAS)                                           | Analgesic consumption<br>Paracetamol intake<br>Duration of pain relief<br>Pain free range of motion<br>Questionnaire of patients' opinion |
| Lewis et al., 1994 <sup>203</sup>           | C | E  | Osteoarthritis - knee                              | 36 (21W)  | TENS (HF) + placebo pills = 36                             | Placebo TENS (0mA) + placebo pills = 36<br>Placebo TENS (0mA) + Naproxen (SoC, sham TENS) = 36                                                                                                                                                                                                                                                                                      | PRN<br>> 3 x 30-60 mins / day x 3 weeks                   | Pain intensity (VAS)                                           | Pain relief (VAS)<br>Pain Index for the Knee<br>Patient Opinion of Treatment<br>Efficacy<br>Piper Pain Intensity Scale                    |
| Likar et al., 2001 <sup>204</sup>           | P | Pr | Postop pain                                        | 30 (9W)   | TENS (HF) + analgesics = 11                                | Placebo TENS (0mA) + analgesics = 12                                                                                                                                                                                                                                                                                                                                                | PRN                                                       | Pain intensity (VAS)<br>• At rest<br>• On movement (abduction) | Analgesic consumption - time of taking the 1st analgesic<br>Blood pressure,<br>Heart rate,<br>Respiratory rate,<br>Side effects,<br>.     |
| Lim et al., 1983 <sup>205</sup>             | P | Pr | Postop pain - abdominal                            | 30 (17W)  | TENS (NR) = 15                                             | Placebo TENS (0mA) = 15                                                                                                                                                                                                                                                                                                                                                             | PRN                                                       | Pain intensity (VAS)                                           | Analgesic consumption (morphine)                                                                                                          |
| Lima et al., 2011 <sup>206</sup>            | P | Pr | Post-op - coronary artery bypass graft             | 20 (10W)  | TENS (HF) + usual care (Physiotherapy and analgesics) = 10 | Usual care (Physiotherapy and analgesics, SoC, no TENS) = 10                                                                                                                                                                                                                                                                                                                        | Fixed<br>1 x 30 mins x 3 / day                            | Pain intensity (VAS)                                           | Analgesic consumption<br>Muscle strength (MIP) and expiratory muscle strength (MEP)<br>Functional residual capacity (FRC)                 |
| Limoges and Rickabaugh, 2004 <sup>207</sup> | P | Pr | Procedural pain - Screening flexible sigmoidoscopy | 90 (39 W) | TENS (HF) = 30                                             | Placebo TENS (0mA) = 30<br>Verbal encouragement (SoC, no TENS) = 30                                                                                                                                                                                                                                                                                                                 | Fixed                                                     | Pain intensity (NRS, categorical scale)                        | McGill Pain Questionnaire<br>12-item questionnaire (Bloating, nausea, electrode site burning or                                           |

O8\_OL-TABLE1\_IncludedStudies

|                                            |   |    |                                           |            |                                                                                          |                                                                                                           |                                                             |                                               |                                                                                                                                                                                                                           |
|--------------------------------------------|---|----|-------------------------------------------|------------|------------------------------------------------------------------------------------------|-----------------------------------------------------------------------------------------------------------|-------------------------------------------------------------|-----------------------------------------------|---------------------------------------------------------------------------------------------------------------------------------------------------------------------------------------------------------------------------|
|                                            |   |    |                                           |            |                                                                                          |                                                                                                           | 10-20 mins throughout procedure<br>1 session                |                                               | tingling, present versus previous SFS pain comparison, and degree of procedural difficulty)                                                                                                                               |
| Lin et al., 2015 <sup>208</sup>            | P | Pr | Shoulder pain – chronic                   | 33 (25W)   | TENS (LF, 2Hz) = 17                                                                      | Transcutaneous pulsed radiofrequency = 16                                                                 | Fixed<br>1 x 15 mins x 3 / week x 1 week<br>3 sessions      | Pain intensity (VAS)                          | Serum cortisol level                                                                                                                                                                                                      |
| Lin et al., 2019 <sup>209</sup>            | P | Pr | Shoulder pain – chronic                   | 50 (34W)   | TENS (HF) = 25                                                                           | Transcutaneous pulsed radiofrequency = 25                                                                 | Fixed<br>1 x 15 mins every other day x 1 week<br>3 sessions | Pain intensity (VAS)                          | Treatment comfort level<br>Constant–Murley shoulder (CMS) score<br>PEG (pain, enjoyment of life, and general activity) score                                                                                              |
| Linde et al., 1995 <sup>210</sup>          | P | Pr | Temporomandibular joint disk displacement | 31 (26W)   | TENS (HF) = 16                                                                           | Flat occlusal splint (SoC, no TENS) = 15                                                                  | Fixed<br>3 x 30 mins / day x 6 weeks<br>66 sessions         | Pain intensity (VAS)                          | Frequency and intensity of complaints (6-step verbal scale)<br>Pain-Track system (pain intensity VAS, sleep or waking hours, mealtimes)                                                                                   |
| Linn et al., 1999 <sup>211</sup>           | P | Pr | Post-stroke – shoulder subluxation        | 40 (22W)   | TENS (HF, AM) + standard care (conventional physiotherapy and occupational therapy) = 20 | Standard care (conventional physiotherapy and occupational therapy, SoC, no TENS) = 20                    | Fixed<br>4 x 30-60 mins / day x 4 weeks<br>112 sessions     | Pain intensity (5-point NRS)                  | Pain free range of motion<br>Shoulder subluxation (radiological)<br>Upper arm girth                                                                                                                                       |
| Lison et al., 2017 <sup>212</sup>          | P | Pr | Procedural pain - office hysteroscopy     | 138 (138W) | TENS (RF) = 46                                                                           | Placebo TENS (0mA) = 46<br>Standard care without analgesia (SoC, no TENS) = 46                            | Fixed<br>5-30 mins throughout procedure<br>1 session        | Pain intensity (VAS and 5-point verbal scale) | Duration of the procedure<br>Vital parameters<br>Vasovagal symptoms<br>Unusual or adverse TENS events<br>Level of satisfaction with the procedure (NRS)                                                                   |
| Liu et al., 1985 <sup>213</sup>            | P | Pr | Post-op - thoracotomy                     | 30 (8W)    | TENS (NR) = 15                                                                           | Placebo TENS (active, <SDT) = 15                                                                          | Fixed<br>1 x 20min / day x 10days<br>10 sessions            | Pain intensity (NRS)                          | Passive range of motion<br>Functional activities score                                                                                                                                                                    |
| Liu et al., 2017 <sup>214</sup>            | P | Pr | Migraine                                  | 110 (87W)  | TENS (HF, TONS) = 22                                                                     | Placebo TENS (0mA) = 22<br>Topiramate (SoC, no TENS) = 22<br>TENS (LF, TONS) = 22<br>TENS (AF, TONS) = 22 | Fixed<br>1 x 30m/day x 4 weeks<br>28 sessions               | Pain intensity (VAS)                          | Analgesic consumption<br>Headache diary (frequency, headache intensity, duration)<br>Self-rating depression scale (SDS)<br>Self-rating anxiety scale (SAS)<br>Headache Impact Test<br>Patient satisfaction with treatment |
| Lofgren and Norrbrink, 2009 <sup>215</sup> | C | E  | Fibromyalgia                              | 32 (32W)   | TENS (HF) = 16                                                                           | Heat therapy (Superficial warmth) = 16                                                                    | PRN<br>1 x >30 mins / session<br>as needed x 3 weeks        | Pain intensity (VAS, NRS)                     | Duration of analgesia<br>Fibromyalgia impact questionnaire<br>Treatment preference                                                                                                                                        |
| Luchesa et al., 2009 <sup>216</sup>        | P | Pr | Post-op coronary artery bypass graft      | 30 (5W)    | TENS (HF) = 15                                                                           | Placebo TENS (0mA) = 15                                                                                   | PRN<br>2 x 50 min / day x 5 days                            | Pain intensity (NRS)                          | Expiratory flux peak<br>Forced vital capacity<br>Forced expiratory volume                                                                                                                                                 |
| Lundeberg, 1984 <sup>217</sup>             | C | Pr | Myalgia - chronic                         | 36 (20W)   | TENS (HF) = 9                                                                            | Placebo pill = 9<br>EA = 9<br>Vibration = 9                                                               | Fixed<br>~ 2 x 45 mins / week x 3 weeks<br>6 sessions       | Pain intensity (VAS)                          | Duration of pain relief                                                                                                                                                                                                   |

O8\_OL-TABLE1\_IncludedStudies

|                                              |   |    |                                          |           |                                                                                                                  |                                                                                                                                                                  |                                                                              |                                                                                        |                                                                                                                                                                                          |
|----------------------------------------------|---|----|------------------------------------------|-----------|------------------------------------------------------------------------------------------------------------------|------------------------------------------------------------------------------------------------------------------------------------------------------------------|------------------------------------------------------------------------------|----------------------------------------------------------------------------------------|------------------------------------------------------------------------------------------------------------------------------------------------------------------------------------------|
| Lundeberg et al., 1985 <sup>218</sup>        | C | E  | Dysmenorrhea - primary                   | 21 (21W)  | TENS (HF) = 21                                                                                                   | Placebo TENS =21 (0mA)<br>TENS (LF, burst) = 21                                                                                                                  | Fixed<br>1 x 45 mins<br>1 session                                            | Pain intensity (VAS)                                                                   | Analgesic consumption McGill Pain Questionnaire<br>Duration of pain relief                                                                                                               |
| Machado et al., 2019 <sup>219</sup>          | P | E  | Dysmenorrhea                             | 88 (88W)  | TENS (HF) + placebo<br>thermotherapy = 22                                                                        | Placebo TENS + placebo<br>thermotherapy = 22<br>Thermotherapy (microwave<br>diathermy) + placebo TENS = 22<br>TENS + Thermotherapy<br>(microwave diathermy) = 22 | Fixed<br>1 x 30 mins<br>1 session                                            | Pain intensity (NRS)                                                                   | McGill Pain Questionnaire<br>Conditioned pain modulation test                                                                                                                            |
| Machin et al., 1988 <sup>220</sup>           | P | E  | Back pain - chronic low non-specific     | 30 (?NR)  | TENS (HF) = 15                                                                                                   | Placebo TENS = 15 (0mA)                                                                                                                                          | Fixed<br>1 x 20 mins/day,<br>unclear x days/week<br>x 3 weeks<br>15 sessions | Pain intensity (VAS and verbal descriptive scale)                                      | Pain diary information                                                                                                                                                                   |
| Mahure et al., 2017 <sup>221</sup>           | P | Pr | Post-op arthroscopic rotator cuff repair | 37 (19W)  | TENS (HF) = 21                                                                                                   | Placebo TENS = 16 (0mA)                                                                                                                                          | Fixed<br>4 x 45 min /day<br>x 7 days<br>28 sessions                          | Pain intensity (VAS)                                                                   | Analgesic consumption (Narcotic)                                                                                                                                                         |
| Manigandan et al., 2014 <sup>222</sup>       | P | Pr | Post stroke - subluxation                | 24 (7W)   | TENS (HF, at supraspinatus, posterior deltoid + long head of biceps) + physiotherapy + occupational therapy = 12 | TENS (HF, at supraspinatus and posterior deltoid) + physiotherapy + occupational therapy = 12                                                                    | Fixed<br>1 x 30-60mins / day<br>x 5 weeks<br>35 sessions                     | No primary outcome                                                                     | Shoulder subluxation in mm (x-ray)<br>Pain - free range of passive lateral rotation and active shoulder abduction range of motion                                                        |
| Mannheimer and Carlsson, 1979 <sup>223</sup> | C | E  | Rheumatoid arthritis                     | 20 (13W)  | TENS (HF) = 20                                                                                                   | TENS (LF) = 20<br>TENS (LF, burst) = 20                                                                                                                          | Fixed<br>1 x 10 mins<br>1 session                                            | Pain intensity (5-point scale)                                                         | Loading test (time patient could hold weight)<br>Duration of analgesia                                                                                                                   |
| Mannheimer and Whalen, 1985 <sup>224</sup>   | P | Pr | Dysmenorrhea                             | 27 (27W)  | TENS (HF) = 9                                                                                                    | Placebo TENS (0mA) = 9<br>TENS (LF, acupuncture-like) = 9                                                                                                        | Fixed<br>1 x 30 mins<br>1 session                                            | Pain intensity (VAS)                                                                   | Total number of painful days<br>Duration of pain relief                                                                                                                                  |
| Mannheimer et al., 1978 <sup>225</sup>       | C | E  | Rheumatoid arthritis                     | 19 (17W)  | TENS (HF, SBC at pain, Group 1) = 19                                                                             | TENS (SDT at pain, group 2) = 19<br>TENS (HF, SDT at remote site, Group 3) = 19                                                                                  | Fixed<br>5 mins / day x 15 days<br>15 sessions                               | No primary outcome                                                                     | Degree of pain relief<br>Loading test (time patient could hold weight)                                                                                                                   |
| Mannheimer et al., 1985 <sup>226</sup>       | P | Pr | Severe angina pectoris                   | 23 (4W)   | TENS (HF) + antianginal medication as needed = 12                                                                | Antianginal medication (SoC, no TENS, 'no treatment' control) = 11                                                                                               | Fixed<br>3 x 60 mins / day x 10 weeks during anginal attacks<br>30 sessions  | Pain intensity (5-point scale)                                                         | Recovery time (min)<br>Frequency of anginal attacks<br>Consumption nitroglycerin<br>Work during exercise<br>Pulse rate, blood pressure<br>Dyspnoea (5-point scale)<br>Electrocardiograms |
| Mansourian et al., 2019 <sup>227</sup>       | P | Pr | TMJ - Myofascial pain                    | 108 (88W) | TENS (HF) + medication = NR (36)                                                                                 | Medication Control (SoC, no intervention) = NR (36)<br>LLLT + medication = NR (36)                                                                               | Fixed<br>1 x 10 mins / day x 3 / week x 3 weeks<br>10 sessions               | Pain intensity (VAS)<br>• at rest<br>• on movement - variety of face and jaw movements | Mouth opening<br>Lateral protrusive movements                                                                                                                                            |



08\_OL-TABLE1\_IncludedStudies

|                                        |   |    |                                                 |           |                                                        |                                                                                                                                                                   |                                                                       |                                |                                                                                                                          |
|----------------------------------------|---|----|-------------------------------------------------|-----------|--------------------------------------------------------|-------------------------------------------------------------------------------------------------------------------------------------------------------------------|-----------------------------------------------------------------------|--------------------------------|--------------------------------------------------------------------------------------------------------------------------|
| Mansuri et al., 2019 <sup>228</sup>    | P | E  | Musculoskeletal pain - Muscle tension dysphonia | 30 (20W)  | TENS (HF) = 15                                         | Placebo TENS (0mA) = 15                                                                                                                                           | Fixed<br>1 x 20 mins<br>1 session                                     | Pain intensity (VAS)           | Vocal tract discomfort scale<br>Extended Nordic musculoskeletal symptoms questionnaire<br>Auditory-perceptual assessment |
| Mansuri et al., 2020 <sup>229</sup>    | P | Pr | Musculoskeletal pain - Muscle tension dysphonia | 20 (20W)  | TENS (LF) + vocal tract training = 10                  | Vocal tract training (SoC) = 10                                                                                                                                   | Fixed<br>1 x 50 mins / day x 2 / week x 2 weeks<br>10 sessions        | Pain intensity (VAS)           | Extended Nordic Musculoskeletal Symptoms Questionnaire<br>Vocal tract discomfort                                         |
| Marchand et al., 1993 <sup>230</sup>   | P | Pr | Back pain - chronic low non-specific            | 42 (22W)  | TENS (HF) = 14                                         | Placebo TENS (0mA) = 12<br>No treatment = 16                                                                                                                      | Fixed<br>1 x 30 mins / day x 2 / week x 10 weeks<br>20 sessions       | Pain intensity (VAS)           | Pain unpleasantness (VAS)                                                                                                |
| Mascarin et al., 2012 <sup>231</sup>   | P | Pr | Osteoarthritis - knee                           | 38 (38W)  | TENS (MF) = 12                                         | Kinesiology taping = 16<br>Ultrasound = 10                                                                                                                        | Fixed<br>1 x 20 mins / day x 2 / week x 12 weeks<br>24 sessions       | Pain intensity (VAS)           | WOMAC<br>Range of motion - knee flexion and extension<br>Six-minute walking test (6-MWT)                                 |
| McCallum et al., 1988 <sup>232</sup>   | P | Pr | Post-op decompressive lumbar laminectomy        | 20 (13W)  | TENS (HF) = 10                                         | Placebo TENS (0mA) = 10                                                                                                                                           | PRN (NR)                                                              | No primary outcome             | Analgesic consumption<br>Plasma morphine concentrations                                                                  |
| Melzack et al., 1983 <sup>233</sup>    | P | Pr | Back pain – acute and chronic low non-specific  | 41 (22W)  | TENS (LF) = 20                                         | Gentle massage = 21                                                                                                                                               | Fixed<br>2 x 30 mins / week x 5 weeks<br>10 sessions                  | Pain intensity (PPI)           | McGill Pain Questionnaire<br>Range of motion                                                                             |
| Merrill, 1989 <sup>234</sup>           | P | Pr | Post-op urologic surgery                        | 96 (0W)   | TENS (NR) + analgesics as needed = 48                  | Analgesics (SoC, no TENS) = 48                                                                                                                                    | PRN                                                                   | No primary outcome             | Analgesic consumption                                                                                                    |
| Miller et al., 2007 <sup>235</sup>     | C | Pr | Spasticity – multiple sclerosis                 | 32 (17W)  | TENS (HF, for 8 hrs) = 32                              | TENS (HF, for 60 mins) = 32                                                                                                                                       | Fixed<br>1 x 8 hours or 60 mins / day x 2 weeks<br>14 sessions        | Pain intensity (VAS)           | Global Spasticity Scale (GSS)<br>Penn Spasm Scale (PSS)<br>TENS experience questionnaire                                 |
| Milsom et al., 1994 <sup>236</sup>     | C | E  | Dysmenorrhea - primary                          | 12 (12W)  | TENS (HF, HI) = 12                                     | Naproxen (500 mg, SoC not TENS) = 12                                                                                                                              | Unclear<br>1 x 10 seconds repeated as necessary                       | Pain intensity (5-point scale) | Uterine contractility and intrauterine pressure                                                                          |
| Moharic et al., 2009 <sup>237</sup>    | P | Pr | Peripheral diabetic neuropathy                  | 65 (NR)   | TENS (HF) = 46                                         | Pregabalin = 5<br>TENS (HF) + Pregabalin = 14                                                                                                                     | Fixed<br>1 x 3h / day x 7 days / week<br>3 weeks<br>21 sessions       | Pain intensity (VAS)           | Pain unpleasantness (VAS)<br>Pain interference with daily activities and sleep (VAS)<br>SF-36                            |
| Mondal et al., 2019 <sup>238</sup>     | P | Pr | Myofascial pain                                 | 109 (86W) | TENS (HF) + + SoC (exercises + heat + medication) = 34 | Ultrasound therapy + SoC (exercises + heat + medication) = 36<br>Trigger point injection (steroid + local anaesthetic) + SoC (exercises + heat + medication) = 39 | Fixed<br>1 x 20 mins per trigger point / day x 2 weeks<br>14 sessions | Pain intensity (VAS)           | Index score of trigger point after palpation<br>Neck disability Index                                                    |
| Moore and Shurman, 1997 <sup>239</sup> | C | E  | Chronic back pain                               | 24 (16W)  | TENS (HF) = 24                                         | Placebo TENS (0mA) = 24<br>NMES = 24<br>NMES + TENS = 24                                                                                                          | Fixed<br>1 x 5 hours / day x 2 days<br>2 sessions                     | Pain intensity (VAS)           | Pain relief (VAS)                                                                                                        |
| Mora et al., 2006 <sup>240</sup>       | P | Pr | Renal colic in Emergency care                   | 100 (29W) | TENS (HF) = 39                                         | Placebo TENS (sham, 0mA) = 34                                                                                                                                     | Fixed<br>1 x 30 mins<br>1 session                                     | Pain intensity (VAS)           | Anxiety (VAS)<br>Morphometric characteristics                                                                            |

08\_OL-TABLE1\_IncludedStudies

|                                         |   |    |                                                          |            |                                           |                                                                                                                                              |                                                                              |                                                    |                                                                                                                                                         |
|-----------------------------------------|---|----|----------------------------------------------------------|------------|-------------------------------------------|----------------------------------------------------------------------------------------------------------------------------------------------|------------------------------------------------------------------------------|----------------------------------------------------|---------------------------------------------------------------------------------------------------------------------------------------------------------|
| Morgan et al., 1996 <sup>241</sup>      | P | Pr | Procedural pain - Distention shoulder arthrography       | 60 (32W)   | TENS (HF) + Lignocaine = 20               | Placebo TENS (active, $\leq$ SDT) + Lignocaine = 20<br>Lignocaine (SoC, no TENS, control) = 20                                               | Fixed<br>1 x 20 mins before procedure then throughout procedure<br>1 session | Pain intensity (VAS)                               | None                                                                                                                                                    |
| Møystad et al., 1990 <sup>242</sup>     | C | E  | Rheumatic disease involving the temporomandibular joint. | 19 (17W)   | TENS (HF) = 19                            | Placebo TENS (0mA) = 19<br>TENS (LF) = 19                                                                                                    | Fixed<br>1 x 30 mins<br>1 session                                            | Pain intensity (VAS)<br>• At rest<br>• on movement | Muscle tenderness to palpation (3-point scale)<br>Range of motion                                                                                       |
| Murray et al., 2004 <sup>243</sup>      | C | E  | Angina pectoris                                          | 10 (2W)    | TENS (HF) = 10                            | Placebo pills = 10                                                                                                                           | Fixed<br>3 x 60 mins / day x 2 / week<br>10 sessions                         | No primary outcome                                 | Treadmill exercise tests<br>• exercise time<br>• Time to maximum ST depression<br>• Rate-pressure product at peak exercise<br>• Time to onset of angina |
| Mutlu et al., 2013 <sup>244</sup>       | P | Pr | Fibromyalgia                                             | 66 (66W)   | TENS + Exercise (supervised) = 33         | Supervised exercise (SoC, no TENS) = 33                                                                                                      | Fixed<br>1 x 30 mins / day x 5 days x 5 weeks<br>25 sessions                 | Pain intensity (VAS – within FIQ)                  | Fibromyalgia Impact Questionnaire (FIQ)<br>Tender point count)<br>Myalgic pain score<br>SF-36                                                           |
| Nabi et al., 2015 <sup>245</sup>        | P | Pr | Peripheral diabetic neuropathy                           | 65 (29W)   | TENS (HF) = 30                            | Pulsed radiofrequency = 30                                                                                                                   | Fixed<br>1 x 20 mins every 2 days x 2 weeks<br>10 sessions                   | Pain intensity (NRS)                               | None                                                                                                                                                    |
| Nash et al., 1990 <sup>246</sup>        | P | E  | Chronic pain                                             | 200 (126W) | TENS (HF, continuous, 100pps) = 50        | TENS (HF, continuous, 10pps) = 50<br>TENS (LF, burst, 10pps) = 50<br>TENS (LF, burst 100pps) = 50                                            | PRN<br>< 2 years                                                             | Pain intensity (VAS)                               | Responders ( $\geq$ 50% reduction in pain)<br>Time to >50% reduction in pain                                                                            |
| Navarathnam et al., 1984 <sup>247</sup> | P | Pr | Post-op cardiac surgery                                  | 31 (6W)    | TENS (NR) + analgesics on demand = 14     | Placebo TENS (0mA) + analgesics on demand = 17                                                                                               | PRN                                                                          | Pain intensity (5-point scale)                     | Analgesic consumption<br>Spirometry<br>Experience of cardiac surgery (Questionnaire)                                                                    |
| Neary, 1981 <sup>248</sup>              | P | Pr | Post incisional surgical pain                            | 200 (NR)   | TENS (HF) = 100                           | Morphine sulphate or Meperidine Hydrochloride (SoC, no TENS) = 100                                                                           | PRN<br>1 x 30 mins or as needed                                              | No primary outcome                                 | Analgesic consumption                                                                                                                                   |
| Neighbours et al., 1987 <sup>249</sup>  | P | E  | Dysmenorrhea                                             | 20 (20W)   | TENS (LF, acupuncture-like) = 10          | Placebo pill = 10                                                                                                                            | Fixed<br>1 x 30 mins<br>1 session                                            | Pain intensity (VAS)                               | Analgesic consumption<br>McGill Pain Questionnaire<br>Pain rating index                                                                                 |
| Nesheim, 1981 <sup>250</sup>            | P | Pr | Labour pain                                              | 70 (70W)   | TENS (LF, burst) = 35                     | Placebo TENS (0mA) = 35                                                                                                                      | PRN during labour                                                            | No primary outcome                                 | Pain relief (4-point category scale)                                                                                                                    |
| Neumark et al., 1978 <sup>251</sup>     | P | Pr | Labour pain                                              | 30 (30W)   | TENS (NR) = 10                            | Pethidine (SoC, no TENS) = 5<br>Placebo TENS (0mA) = 5<br>Remote TENS (electrodes in wrong positions) = 5<br>No treatment = 5 (no analgesia) | Fixed<br>70 mins<br>1 session                                                | Pain intensity (6-point scale)                     | None                                                                                                                                                    |
| Ng et al., 2003 <sup>252</sup>          | P | Pr | Osteoarthritis - knee                                    | 24 (23W)   | TENS (LF) + Education about knee care = 8 | Education about knee care (SoC, no TENS) = 8<br>EA + Education about knee care = 8                                                           | Fixed<br>1 x 20 mins on alternative days x each session over 2 weeks         | Pain intensity (NRS)                               | Range of motion<br>Timed Up-and-Go test                                                                                                                 |

08\_OL-TABLE1\_IncludedStudies

|                                                                                                                                                                                               |   |    |                                                      |           |                                                    |                                                                                                                                |                                                                        |                                                    |                                                                                                                                                                                                                                                               |
|-----------------------------------------------------------------------------------------------------------------------------------------------------------------------------------------------|---|----|------------------------------------------------------|-----------|----------------------------------------------------|--------------------------------------------------------------------------------------------------------------------------------|------------------------------------------------------------------------|----------------------------------------------------|---------------------------------------------------------------------------------------------------------------------------------------------------------------------------------------------------------------------------------------------------------------|
|                                                                                                                                                                                               |   |    |                                                      |           |                                                    |                                                                                                                                | 8 sessions                                                             |                                                    |                                                                                                                                                                                                                                                               |
| Nordemar and Thorner, 1981 <sup>253</sup>                                                                                                                                                     | P | Pr | Neck pain - acute cervical pain                      | 30 (18W)  | TENS (HF) + neck collar + analgesics = 10          | Neck collar + analgesics (SoC, no TENS) = 10<br>Manual therapy + neck collar + analgesics = 10                                 | Fixed<br>1 x 30 mins x 3 / week<br>3 session                           | Pain intensity (VAS)<br>● at rest<br>● on movement | Analgesic consumption<br>Range of motion                                                                                                                                                                                                                      |
| Norrbrink, 2009 <sup>254</sup>                                                                                                                                                                | C | Pr | Spinal cord injury neuropathic pain                  | 24 (4W)   | TENS (HF) = 24                                     | TENS (LF) = 24                                                                                                                 | Fixed<br>3 x 30 to 40 mins / day x 7 days x 2 weeks<br>42 sessions     | Pain intensity (Borg CR-10)                        | Pain unpleasantness (BORG CR - 10)<br>Global pain relief (5-point scale)<br>Multidimensional Pain Inventory<br>Hospital Anxiety and Depression Scale<br>Nordic Basic Sleep Questionnaire<br>Life Satisfaction Instrument-9<br>Ability to cope with pain (NRS) |
| Olsén et al., 2007 <sup>255</sup>                                                                                                                                                             | P | E  | Postpartum uterine contractions                      | 21 (21W)  | TENS (HF, brief HI) = 12                           | TENS (HF, LI) = 8                                                                                                              | Fixed<br>1 x 1 min repeated 2 times if necessary<br>1 session          | Pain intensity (VAS)                               | Uterine contraction discomfort (5-point verbal scale)<br>Discomfort from treatment (5-point verbal scale)                                                                                                                                                     |
| Olsen et al., 2019 <sup>256</sup>                                                                                                                                                             | C | E  | Dysmenorrhea - primary                               | 16 (16W)  | TENS (HF, brief HI) = 7 (7W)                       | Control (SoC, no TENS, 'delayed intervention) = 9 (9W)                                                                         | PRN<br>1 x 60 seconds repeated as needed                               | Pain intensity (VAS)                               | Analgesic consumption<br>Limitation in physical function (VAS)<br>Discomfort from the treatment                                                                                                                                                               |
| Oncel et al., 2002 <sup>257</sup>                                                                                                                                                             | P | Pr | Minor rib fracture                                   | 100 (41W) | TENS (HF) = 25                                     | Placebo TENS (0mA) + Naproxen NSAID = 25<br>Naproxen NSAID (SoC, no TENS) = 25<br>Placebo pills = 25                           | Fixed<br>2 x 30 mins / day x 3 days<br>6 sessions                      | Pain intensity (VAS)                               | None                                                                                                                                                                                                                                                          |
| Oosterhof et al., 2006 <sup>258</sup><br><br>Secondary reports<br>Oosterhof et al., 2008 <sup>259</sup> ,<br>Oosterhof et al., 2012 <sup>260</sup> ,<br>Oosterhof et al., 2012 <sup>261</sup> | P | Pr | Chronic pain, various types                          | 163 (97W) | TENS (HF) = 81                                     | Placebo TENS = 82 (0mA)                                                                                                        | PRN<br>x 10 days                                                       | Pain intensity (VAS)                               | TENS satisfaction                                                                                                                                                                                                                                             |
| Ordog, 1987 <sup>262</sup>                                                                                                                                                                    | P | Pr | Acute traumatic pain                                 | 100 (NR)  | TENS (NR) = 25                                     | Placebo TENS (0mA) = 25<br>TENS (NR) + acetaminophen with codeine = 25<br>Placebo TENS (0mA) + acetaminophen with codeine = 25 | PRN                                                                    | Pain intensity (VAS)                               | TENS satisfaction<br>Side effects                                                                                                                                                                                                                             |
| Ozkaraoglu et al., 2020 <sup>263</sup>                                                                                                                                                        | P | Pr | Back pain - low non-specific                         | 40 (19W)  | TENS (HF) + ultrasound, hot pack and exercise = 20 | High Intensity Laser Therapy (HILT) + ultrasound, hot pack and exercise = 20                                                   | Fixed<br>1 x 20 mins / day x 5 days a week for a total of 20 sessions. | Pain intensity (VAS)                               | Range of motion<br>Oswestry Disability Questionnaire<br>Beck Depression Inventory                                                                                                                                                                             |
| Ozkul et al., 2015 <sup>264</sup>                                                                                                                                                             | C | Pr | Neuropathic pain in patients with spinal cord injury | 24 (6W)   | TENS (HF) = 12                                     | Visual illusion = 12                                                                                                           | Fixed<br>1 x 30 mins / day x 5 days x 2 weeks<br>10 sessions           | Pain intensity (VAS)                               | Neuropathic sign and symptoms (DNa)<br>McGill pain questionnaire<br>Neuropathic Pain Scale (NPS)<br>Brief Pain Inventory                                                                                                                                      |

08\_OL-TABLE1\_IncludedStudies

|                                          |   |    |                                                |            |                                                     |                                                                                                                            |                                                                     |                                               |                                                                                                                                                                                               |
|------------------------------------------|---|----|------------------------------------------------|------------|-----------------------------------------------------|----------------------------------------------------------------------------------------------------------------------------|---------------------------------------------------------------------|-----------------------------------------------|-----------------------------------------------------------------------------------------------------------------------------------------------------------------------------------------------|
| Oztaş and Iyigün, 2019 <sup>265</sup>    | P | Pr | Post-op abdominal surgery                      | 48 (10W)   | TENS (LF-HF) + Tramadol PCA + rescue Pethidine = 16 | Analgesic Medication (tramadol PCA + rescue pethidine (SoC, no TENS) = 16<br>TAES + tramadol PCA + rescue pethidine = 16   | Fixed<br>1 x 30 mins at 2h, 18h, 22h, 42, 46h post-op<br>5 sessions | Pain intensity (VAS)                          | Analgesic consumption (Tramadol - PCA)<br>Nausea severity (VAS)<br>Vomiting (frequency)<br>Antiemetic consumption<br>Pulmonary function tests                                                 |
| Ozturk et al., 2016 <sup>266</sup>       | P | Pr | Post-op cardiac surgery                        | 120 (39W)  | TENS (HF) + morphine (PCA) = 40                     | Placebo TENS + placebo parasternal block (saline) + morphine (PCA) (Control) = 37<br>Placebo TENS + Parasternal block = 38 | PRN<br>60 mins treatments with 60 mins rest as needed               | Pain intensity (VAS)                          | Analgesic consumption (morphine - PCA)<br>Mean arterial pressure, heart rate, and arterial blood gas analysis<br>Duration of extubating, ICU and hospital stay<br>Opioid-related side effects |
| Padma et al., 2000 <sup>267</sup>        | P | Pr | Labour pain                                    | 70 (70W)   | TENS (HF) = 50                                      | Placebo TENS (0mA) = 20                                                                                                    | PRN                                                                 | No primary outcome                            | Pain relief (4 categories)<br>• Subjective assessment (by the patient)<br>• Observer Assessment<br>• Monitoring mother and foetus<br>• Duration of labour APGAR score                         |
| Paker et al., 2006 <sup>268</sup>        | P | Pr | Knee AO                                        | 60 (NR)    | TENS (HF) = NR                                      | Intra-articular hyaluronic acid injection = NR                                                                             | Fixed<br>1 x 20 mins / day x 5 / week x 3 weeks<br>15 sessions      | Pain intensity (5-point scale) from WOMAC     | WOMAC<br>Lequesne Index<br>SF-36                                                                                                                                                              |
| Palmer et al., 2014 <sup>269</sup>       | P | Pr | Osteoarthritis - knee                          | 224 (141W) | TENS (HF) + Exercise + education = 73               | Placebo TENS (0mA) + Exercise + education = 74<br>Exercise + education + exercise (SoC, no TENS control) = 77              | PRN<br>x 6 weeks                                                    | Pain intensity (5-point scale) from WOMAC     | WOMAC<br>Maximum knee extensor torque<br>Patient global assessment of change scale<br>Self-efficacy for exercise                                                                              |
| Pan et al., 2003 <sup>270</sup>          | P | E  | Tendinitis - Chronic calcific of the Shoulders | 60 (39W)   | TENS (HF) + hydrocollator pack = 28 (30 shoulders)  | Extracorporeal shock wave = 32 (33 shoulders)                                                                              | Fixed<br>1 x 20 mins / day x 3 / week x 4 weeks<br>12 sessions      | Pain intensity (VAS)                          | Constant score<br>Manual muscle test (MMT)                                                                                                                                                    |
| Park et al., 2015 <sup>271</sup>         | P | Pr | Post op thyroidectomy - neck pain              | 100 (NR)   | TENS (HF) = 50                                      | Placebo TENS = 50 (0mA)                                                                                                    | Fixed<br>throughout surgery<br>1 session                            | Pain intensity (NRS)<br>• Anterior wound pain | Analgesic consumption post-operative                                                                                                                                                          |
| Patil and Aileni, 2017 <sup>272</sup>    | P | Pr | Temporomandibular disorder                     | 36 (23W)   | TENS (HF) = 18                                      | Exercise home programme = 18                                                                                               | Fixed<br>1 x 30 mins / day x once / week x 4 weeks<br>1 session     | Pain intensity (VAS)                          | Pain free range of motion<br>masticatory muscle tenderness (VAS)                                                                                                                              |
| Peacock et al., 2019 <sup>273</sup>      | P | Pr | Chronic pain - Various                         | 100 (22W)  | TENS (LF, AL-TENS) + SoC = 30                       | Tennant Biomodulator + SoC = 34<br>Acupuncture + SoC = 36                                                                  | PRN<br>2 x 20min / day x 6 weeks<br>12 sessions                     | Pain intensity (VAS, as pain log)             | Million visual analogue scale<br>PTSD checklist – military<br>Center for Epidemiological Studies - depression scale                                                                           |
| Pietrosimone et al., 2009 <sup>274</sup> | P | E  | Tibiofemoral OA                                | 33 (16W)   | TENS (HF) = 10                                      | No treatment (control) = 12<br>Focal joint knee cooling = 11                                                               | Fixed<br>1 x 45 mins<br>1 session                                   | Pain intensity (VAS)                          | WOMAC<br>Quadriceps CAR                                                                                                                                                                       |

O8\_OL-TABLE1\_IncludedStudies

|                                                                                                          |   |    |                                                  |            |                                                                        |                                                                                                                                                                                                      |                                                                                       |                                                              |                                                                                                                                   |
|----------------------------------------------------------------------------------------------------------|---|----|--------------------------------------------------|------------|------------------------------------------------------------------------|------------------------------------------------------------------------------------------------------------------------------------------------------------------------------------------------------|---------------------------------------------------------------------------------------|--------------------------------------------------------------|-----------------------------------------------------------------------------------------------------------------------------------|
|                                                                                                          |   |    |                                                  |            |                                                                        |                                                                                                                                                                                                      |                                                                                       |                                                              | Peak knee extension torque with maximal voluntary isometric contractions (MVIC)                                                   |
| Pietrosimone et al., 2011 <sup>275</sup><br>Secondary report<br>Pietrosimone et al., 2010 <sup>276</sup> | P | Pr | Tibiofemoral OA                                  | 36 (21W)   | TENS (HF) + Exercises (strengthening) = 12                             | Placebo TENS (Fading) = 12<br>Exercise (strengthening, SoC, no TENS control) = 12                                                                                                                    | PRN<br>>8 hours / day x 4 weeks<br>21 sessions                                        | No primary outcome                                           | WOMAC<br>Quadriceps strength<br>Peak knee extension torque with maximal voluntary isometric contractions                          |
| Pietrosimone et al., 2020 <sup>277</sup>                                                                 | P | Pr | OA, knee [during therapeutic exercise]           | 90 (39W)   | TENS (HF) + Exercises (strengthening) = 30                             | Placebo TENS (0mA) + Exercises<br>Exercises = 30                                                                                                                                                     | PRN<br>during all exercise sessions and during activities of daily living for 4 weeks | No primary outcomes                                          | WOMAC<br>Quadriceps Strength and Voluntary activation<br>Peak knee extension torque with maximal voluntary isometric contractions |
| Pike, 1978 <sup>278</sup>                                                                                | P | Pr | Post-op hip replacement                          | 40 (19W)   | TENS (HF) + medication (pethidine) = 20                                | Medication (pethidine, SoC, no TENS control) = 20                                                                                                                                                    | PRN<br>> 8 hours / day                                                                | No primary outcome                                           | Analgesic consumption (Pethidine)<br>Pain relief (4 categories)<br>Nausea and vomiting (frequency)                                |
| Pitangui et al., 2012 <sup>279</sup>                                                                     | P | Pr | Post episiotomy pain                             | 40 (40W)   | TENS (HF) = 20                                                         | No treatment = 20                                                                                                                                                                                    | Fixed<br>1 x 60 mins<br>1 session                                                     | Pain intensity (NRS)<br>• rest<br>• standing<br>• walking    | McGill Pain Questionnaire<br>TENS-related questions<br>Functional limitations                                                     |
| Pitangui et al., 2014 <sup>280</sup>                                                                     | P | E  | Post episiotomy pain                             | 33 (40W)   | TENS (HF) = 11                                                         | Placebo TENS (0mA) = 10<br>TENS (LF) = 13                                                                                                                                                            | Fixed<br>1 x 30 mins pre-injection<br>1 session                                       | Pain intensity (NRS)<br>• Resting pain<br>• Pain on movement | Treatment satisfaction<br>TENS-related questions                                                                                  |
| Platon et al., 2010 <sup>281</sup>                                                                       | P | Pr | Post-op surgical abortion                        | 200 (200W) | TENS (HF, HI) = 100                                                    | Fentanyl i.v. (SoC, no TENS control) = 100                                                                                                                                                           | Fixed<br>1 x 1 min (repeated if necessary)                                            | Pain intensity (VAS)                                         | Analgesic consumption<br>Nausea (VAS)<br>Time in recovery ward<br>Ramsay sedation score                                           |
| Platon et al., 2018 <sup>282</sup>                                                                       | C | E  | Post-op gynaecologic laparoscopic surgery        | 93 (93W)   | TENS (HF, HI) = 47                                                     | Morphine i.v. (SoC, no TENS control) = 46                                                                                                                                                            | Fixed<br>1 x 1 min (repeated if necessary)                                            | Pain intensity (VAS)                                         | Analgesic consumption (Opioids)<br>Nausea (VAS)<br>Time in recovery ward<br>Ramsay sedation score                                 |
| Prabhakar and Ramteke, 2011 <sup>283</sup>                                                               | P | E  | Radiculopathy - cervical                         | 75 (39W)   | TENS (HF) + Hot fomentation + Exercises, Isometric neck (Group B) = 25 | Hot fomentation + Exercises, Isometric neck (SoC, no TENS control, Group C) = 25<br>Cervical contralateral lateral flexion mobilization + Hot fomentation + Exercises, Isometric neck (Group A) = 25 | Fixed<br>1 x 30 mins<br>1 session                                                     | Pain intensity (VAS)                                         | Northwick<br>Park neck pain questionnaire<br>Neuropathic pain scale,<br>SF-McGill Pain Questionnaire                              |
| Presser et al., 2000 <sup>284</sup>                                                                      | P | E  | Procedural pain - Injection of epidural steroids | 90 (30W)   | TENS (HF) = 30                                                         | Placebo TENS (active, <SDT) + Local anaesthetic = 30<br>Local anaesthetic (SoC, no TENS control) = 30                                                                                                | Fixed<br>Throughout procedure                                                         | Pain intensity (VAS)                                         | None                                                                                                                              |

O8\_OL-TABLE1\_IncludedStudies

|                                        |   |    |                                                              |                               |                                                          |                                                                                                                                                                                                              |                                                                                     |                                                                         |                                                                                                                                                                                                     |
|----------------------------------------|---|----|--------------------------------------------------------------|-------------------------------|----------------------------------------------------------|--------------------------------------------------------------------------------------------------------------------------------------------------------------------------------------------------------------|-------------------------------------------------------------------------------------|-------------------------------------------------------------------------|-----------------------------------------------------------------------------------------------------------------------------------------------------------------------------------------------------|
| Rainov et al., 1994 <sup>285</sup>     | P | Pr | Post-op spinal surgery                                       | 234 (121W)                    | TENS (Alternating F) + analgesic medication = 126        | Analgesic medication (SoC, no TENS control) = 108                                                                                                                                                            | Fixed<br>1 x 60 mins every 2 hours<br>? how many days?                              | Pain intensity (VAS)                                                    | Analgesic consumption<br>Pain unpleasantness (VAS)                                                                                                                                                  |
| Rajfur et al., 2017 <sup>286</sup>     | P | Pr | Back pain - chronic low non-specific                         | 127 (73W)                     | TENS (HF) + exercise = 20                                | Exercise (SoC, no TENS control) = 21<br>TENS (LF, acupuncture = like) + exercise = 20<br>High-voltage electrical stimulation) + exercise = 22<br>IFT) + exercise = 22<br>Diadynamic current) + exercise = 22 | Fixed<br>1 x 60 mins / day x 5 / week x 3 weeks<br>15 sessions                      | Pain intensity (VAS)                                                    | Modified Laitinen pain scale<br>The Oswestry questionnaire<br>Roland-Morris Disability Questionnaire<br>Lasègue test<br>Schober test<br>Postural stability                                          |
| Rajpurohit et al., 2010 <sup>287</sup> | P | Pr | Masticatory muscle pain                                      | 60 (24W)                      | TENS (HF) = 30                                           | Microcurrent electrical nerve stimulation (= 30)                                                                                                                                                             | Fixed<br>1 x 20 mins / day x 7 days<br>7 sessions                                   | Pain intensity (VAS)                                                    | Muscle tenderness (algometry)                                                                                                                                                                       |
| Rakel and Frantz, 2003 <sup>288</sup>  | C | E  | Post-op abdominal surgery                                    | 33 (17W)                      | TENS (MF) + analgesics = 33                              | Placebo TENS (0mA) + analgesics = 33<br>Analgesics (SoC, no TENS control) = 33                                                                                                                               | Fixed<br>1 x 15 mins for duration of measurements                                   | Pain intensity (NRS)                                                    | Iowa Gait Test<br>Pulmonary status                                                                                                                                                                  |
| Rakel et al., 2014 <sup>289</sup>      | P | Pr | Post-op knee arthroplasty (control of pain during exercises) | 317 (173W)                    | TENS (HF) + analgesics = 122                             | Placebo TENS (Fading) + analgesics = 123<br>Analgesics (SoC, no TENS control) = 72                                                                                                                           | Fixed<br>1 x 20 mins before exercise, then during exercise x 1 to 2 / day x 6 weeks | Pain intensity (NRS)<br>• At rest<br>• On movement                      | Pain catastrophizing<br>State and trait anxiety<br>Geriatric depression scale<br>Knee injury and osteoarthritis outcome score<br>Quantitative sensory testing<br>Range of motion<br>Gait speed test |
| Ramanathan et al., 2017 <sup>290</sup> | P | Pr | Pot op knee arthroplasty                                     | 116 (30W)                     | TENS (NR) + opioid analgesics + femoral nerve block = 58 | Placebo TENS (Fading to 0mA) + opioid analgesics + femoral nerve block = 58                                                                                                                                  | PRN<br>1 x 2 hours followed by 30 mins rest as needed for 6 weeks                   | Pain intensity (VAS)                                                    | Analgesic consumption<br>Time up and go test<br>Range of motion<br>Knee injury and osteoarthritis outcome score<br>SF-12                                                                            |
| Ramos et al., 2018 <sup>291</sup>      | P | Pr | Back pain - low, lumbar disc herniation                      | 29 (14W)                      | TENS (HF) = 14                                           | Exercises (segmental stabilisation, SoC) = 15                                                                                                                                                                | Fixed<br>1 x 60 mins / day x 2 / week x 8 weeks<br>18 sessions                      | Pain intensity (VAS)                                                    | LM Muscular Fatigue<br>Fatigue Test<br>Transversus abdominis activation capacity<br>Oswestry Disability Index                                                                                       |
| Rani et al., 2020 <sup>292</sup>       | P | Pr | Rotator cuff                                                 | 76 (34W)<br>70 (32W) analysed | TENS (HF) + SoC + rescue meds = 35                       | Exercises (SoC, no TENS control) + rescue meds = 35                                                                                                                                                          | Fixed<br>1 x 20mins / day x 5 days                                                  | Pain intensity (NRS, pain item from Shoulder Pain and Disability Index) | Shoulder Pain and Disability Index                                                                                                                                                                  |
| Ratajczak et al., 2011 <sup>293</sup>  | P | Pr | Back pain – low, desmopathy                                  | 80 (57W)                      | TENS = 40                                                | Diadynamic currents = 40<br>Healthy participants groups (no TENS) = 40                                                                                                                                       | Fixed<br>1 x 30 mins / day x 5 days / week x 2 weeks<br>10 sessions                 | Pain intensity (VAS)                                                    | Functional pain index by Lequesne<br>Range of motion                                                                                                                                                |

O8\_OL-TABLE1\_IncludedStudies

|                                             |   |    |                                                                       |           |                                             |                                                                                                                                        |                                                                                                    |                                 |                                                                                                                                      |
|---------------------------------------------|---|----|-----------------------------------------------------------------------|-----------|---------------------------------------------|----------------------------------------------------------------------------------------------------------------------------------------|----------------------------------------------------------------------------------------------------|---------------------------------|--------------------------------------------------------------------------------------------------------------------------------------|
| Rawat et al., 1991 <sup>294</sup>           | P | Pr | Procedural pain - during biliary extracorporeal shockwave lithotripsy | 100       | TENS (MF, on back) = 25                     | Placebo TENS (0mA, on back) = 25<br>TENS (MF, back and acupoints on leg) = 25<br>Placebo TENS (0mA, on back and acupoints on leg) = 25 | PRN throughout procedure                                                                           | Pain intensity (5-point scale)  | Analgesic consumption                                                                                                                |
| Renovato França et al., 2019 <sup>295</sup> | P | Pr | Radiculopathy – lumbar disc herniation                                | 40 (25W)  | TENS = 20                                   | Exercises (Motor control training, SoC) = 20                                                                                           | Fixed 2 x 60 mins / week x 8 weeks<br>16 session                                                   | Pain intensity (VAS)            | McGill Pain Questionnaire<br>Oswestry Disability Index<br>Transversus Abdominis Activation Capacity                                  |
| Reuss et al., 1988 <sup>296</sup>           | P | Pr | Post-op cholecystectomy                                               | 64 (50W)  | TENS (HF) = 30                              | No treatment (+ meperidine on demand) = 34                                                                                             | PRN                                                                                                | No primary outcomes             | Analgesic consumption<br>Complications                                                                                               |
| Revadkar and Bhojwani, 2019 <sup>297</sup>  | P | Pr | Dysmenorrhea                                                          | 30 (30W)  | TENS (HF) + rescue medication = 15          | IFT + rescue medication = 15                                                                                                           | Fixed 1 x 20mins<br>1 session                                                                      | Pain intensity (NRS)            | None                                                                                                                                 |
| Ringel and Taubert, 1991 <sup>298</sup>     | P | Pr | Migraine                                                              | 57 (48W)  | TENS (NR) = 31                              | Ergocomb (prophylactic buccal tablets for migraine) (SoC, no TENS) = 26                                                                | PRN >1 x 30 mins / day as needed for 3 months                                                      | Pain intensity (4-point scale)  | Number of headache days                                                                                                              |
| Robb et al., 2007 <sup>299</sup>            | C | E  | Chronic pain associated with breast cancer treatment                  | 41 (41IW) | TENS (HF) = 41                              | Placebo TENS (0mA) = 41<br>Transcutaneous spinal electroanalgesia = 41                                                                 | PRN >10-30 mins / day x 3 weeks                                                                    | Pain intensity (NRS) – from BPI | Analgesic consumption<br>BPI<br>Hospital Anxiety and Depression (HAD) Scale<br>Range of motion<br>Patient satisfaction questionnaire |
| Robinson et al., 2001 <sup>300</sup>        | P | E  | Procedural pain – colonoscopy                                         | 33 (NR)   | TENS (various F) + standard medication = 10 | Placebo TENS (0mA) + standard medication = 13<br>Standard medication (SoC, no TENS control) = 10                                       | Fixed 1 x 5mins pre-procedure, 1 x 5 mins during procedure, 1 x 5 mins post procedure<br>1 session | Pain intensity (NRS)            | Post-procedure evaluation questionnaire                                                                                              |
| Roche et al., 1985 <sup>301</sup>           | P | Pr | Haemophilia                                                           | 36 (NR)   | TENS (HF) = 28                              | Placebo TENS (0mA) = 8                                                                                                                 | PRN 1 x 25 mins continuous from recovery room for 5 days as needed                                 | Pain intensity (NRS)            | McGill Pain Questionnaire                                                                                                            |
| Rooney et al., 1983 <sup>302</sup>          | P | E  | Post-op – thoracotomy                                                 | 44 (17W)  | TENS (HF) = 22                              | Placebo TENS (0mA) = 22                                                                                                                | Fixed 1 x 25 mins<br>1 session                                                                     | No primary outcome              | Analgesic consumption – (Narcotic)                                                                                                   |
| Rosenberg et al., 1978 <sup>303</sup>       | P | Pr | Post-op cholecystectomy                                               | 12 (NR)   | TENS (HF) + analgesics = 6                  | Analgesics (SoC, no TENS control) = 6                                                                                                  | PRN 3 days as needed                                                                               | No primary outcome              | Analgesic consumption<br>Pulmonary function                                                                                          |
| Rutgers et al., 1988 <sup>304</sup>         | P | Pr | Postherpetic neuralgia                                                | 23 (13W)  | TENS (HF) = 13                              | Acupuncture = 10                                                                                                                       | PRN 3 x 30 mins / week x 1 week then as needed for 6 weeks                                         | Pain intensity (NRS)            | None                                                                                                                                 |
| Sadala et al., 2018 <sup>305</sup>          | P | E  | Procedural pain - during carboxytherapy                               | 84 (84W)  | TENS (HF) = 28                              | Placebo TENS (Fading) – 28<br>No treatment (Control) = 28                                                                              | Fixed 1 min / puncture<br>1 session                                                                | Pain intensity (VAS)            | None                                                                                                                                 |
| Sahin et al., 2011 <sup>306</sup>           | P | E  | Cervical myofascial pain syndrome                                     | 80 (40W)  | TENS (HF, conventional) = 20                | Placebo TENS (Fading) = 20<br>TENS (LF, acupuncture = like) = 20                                                                       | Fixed 1 x 30min/day x 3 / week                                                                     | Pain intensity (VAS)            | SF-36<br>Bodily pain subscale                                                                                                        |

O8\_OL-TABLE1\_IncludedStudies

|                                              |   |    |                                                             |            |                                                                                 |                                                                                                          |                                                                   |                                                                               |                                                                                                                              |
|----------------------------------------------|---|----|-------------------------------------------------------------|------------|---------------------------------------------------------------------------------|----------------------------------------------------------------------------------------------------------|-------------------------------------------------------------------|-------------------------------------------------------------------------------|------------------------------------------------------------------------------------------------------------------------------|
|                                              |   |    |                                                             |            |                                                                                 | TENS (LF, burst) = 20                                                                                    | ?? no. weeks?<br>1 session                                        |                                                                               |                                                                                                                              |
| Samadzadeh et al., 2017 <sup>307</sup>       | P | Pr | Labour pain                                                 | 120 (120W) | TENS (HF, continuous, LF, burst) + meperidine as rescue analgesia = 40          | Entonox + meperidine as rescue analgesia = 40<br>TENS + Entonox + meperidine as rescue analgesia = 40    | PRN<br>During labour                                              | Pain intensity (VAS)                                                          | Analgesic consumption                                                                                                        |
| Sangtong et al., 2019 <sup>308</sup>         | P | Pr | Osteoarthritis - knee                                       | 148 (135W) | TENS (HF) + US = 64                                                             | US = 68                                                                                                  | Fixed<br>1 x 10 mins / day x 5 days x 2 weeks<br>10 session       | Pain intensity (NRS)<br>• At rest<br>• On movement (walking, climbing stairs) | 6-min walk test<br>Patient global assessment<br>Adverse events                                                               |
| Santamato et al., 2013 <sup>309</sup>        | P | Pr | Botulinum toxin type A injection for post-stroke spasticity | 32 (18W)   | TENS (LF) = 16                                                                  | Shock wave therapy = 16                                                                                  | Fixed<br>1 x 30 mins / day x 2 / day x 5 days<br>10 sessions      | Pain intensity (VAS)                                                          | Spasticity scale<br>Spasm scale                                                                                              |
| Santana et al., 2016 <sup>310</sup>          | P | Pr | Labour pain                                                 | 46 (46W)   | TENS (HF) + routine obstetric care = 23                                         | Routine obstetric care (SoC, no TENS control) = 23                                                       | Fixed<br>1 x 30 mins / day x 5 days x 2 weeks<br>10 sessions      | Pain intensity (VAS)                                                          | Time to analgesic requirement<br>Pain location                                                                               |
| Saranya et al., 2019 <sup>311</sup>          | P | Pr | Muscle pain – Temporomandibular Masticatory Muscle Pain     | 60 (42W)   | TENS (HF) + jaw exercises + hot fomentation = 30                                | Microcurrent electrical stimulation + jaw exercises + hot fomentation = 30                               | Fixed<br>1 x 20min / day x 5 days<br>5 sessions                   | Pain intensity (VAS)                                                          | Mouth opening and functional assessment                                                                                      |
| Sayilir and Yildizgoren, 2017 <sup>312</sup> | P | Pr | Back pain - chronic low non-specific                        | 55 (32W)   | TENS (HF) = 26                                                                  | Diadynamic currents = 29                                                                                 | Fixed<br>1 x 30 mins / day x 5 days/week x 2 weeks<br>10 sessions | Pain intensity (VAS)<br>• Rest<br>• On movement                               | Roland Morris Disability Questionnaire<br>Oswestry Disability Index (ODI)<br>Hand finger floor distance (HFFD)               |
| Seo et al., 2013 <sup>313</sup>              | P | Pr | Chronic myofascial pain syndrome                            | 76 (64W)   | TENS (LF, burst) + Botulinum toxin A = 38                                       | Botulinum toxin A + electrical stimulation with muscle contraction = 38                                  | Fixed<br>1 x 30 mins / day x 3 days<br>3 sessions                 | Pain intensity (VAS)                                                          | Neck Pain and Disability Scale (NPAD)<br>Global Assessment of Improvement Scale (GAS)<br>Pressure algometry (pain threshold) |
| Serry et al., 2016 <sup>314</sup>            | P | Pr | Peripheral diabetic neuropathy                              | 60 (32W)   | TENS (HF) + pharmacological therapy = 20                                        | Pharmacological therapy (SoC, no TENS control) = 20<br>Exercise (aerobic) + pharmacological therapy = 20 | Fixed<br>1 x 30 mins / day x 3 / week x 8 weeks<br>24 sessions    | Pain intensity (VAS)                                                          | Nerve conduction studies                                                                                                     |
| Sezen et al., 2017 <sup>315</sup>            | P | Pr | Post-op thoracotomy                                         | 87 (25W)   | TENS (HF) + Analgesics (diclofenac i.m., tramadol i.v. + paracetamol i.v.) = 43 | Placebo TENS + Analgesics (diclofenac i.m., tramadol i.v. + paracetamol i.v.) = 44 (0mA)                 | PRN<br>During labour at 8 h intervals                             | Pain intensity (VAS)                                                          | Analgesic consumption<br>Pulse rate<br>Blood pressure<br>Saturation<br>Complication                                          |
| Shahoei et al., 2017 <sup>316</sup>          | P | Pr | Labour pain                                                 | 90 (90W)   | TENS (PRN) = 30                                                                 | Placebo TENS = 30 (0mA)<br>Routine care (SoC, no TENS control) = 30                                      | PRN<br>During labour                                              | Pain intensity (VAS)                                                          |                                                                                                                              |



O8\_OL-TABLE1\_IncludedStudies

|                                            |   |    |                                                                       |          |                                                   |                                                                                                         |                                                                                                   |                                                                           |                                                                                                                                                                                                |
|--------------------------------------------|---|----|-----------------------------------------------------------------------|----------|---------------------------------------------------|---------------------------------------------------------------------------------------------------------|---------------------------------------------------------------------------------------------------|---------------------------------------------------------------------------|------------------------------------------------------------------------------------------------------------------------------------------------------------------------------------------------|
| Shehab and Adham, 2000 <sup>317</sup>      | P | Pr | Shoulder pain                                                         | 50 (50W) | TENS (HF) + cold pack + stretching exercises = 26 | Ultrasound therapy + cold pack + stretching exercises = 24                                              | Fixed<br>1 x 30 mins / day x 3 to 5 / week x 3 to 5 weeks<br>13 sessions                          | Pain intensity (VAS)                                                      | Range of motion                                                                                                                                                                                |
| Sherry et al., 2001 <sup>318</sup>         | P | Pr | Back pain - chronic low non-specific                                  | 44 (21W) | TENS (NR) + analgesics if needed = 22             | Vertebral axial decompression = 22                                                                      | Fixed<br>1 x 10 mins / day x 20 days then 1 x 10 mins / week x 4 weeks<br>24 sessions             | Pain intensity (VAS)                                                      | Disability (4-point scale)                                                                                                                                                                     |
| Shimoji et al., 2007 <sup>319</sup>        | P | E  | Back pain - chronic low non-specific                                  | 28 (24W) | TENS (HF) = 9                                     | Placebo TENS (0mA) = 8<br>TENS (Bidirectional modulated sine waves) = 11                                | Fixed<br>1 x 15 mins<br>1 session                                                                 | Pain intensity NRS                                                        | None                                                                                                                                                                                           |
| Shimoura et al., 2019 <sup>320</sup>       | P | E  | Osteoarthritis - knee                                                 | 50 (35W) | TENS (MF) = 25                                    | Placebo TENS = 25 (0mA)                                                                                 | Fixed<br>Details NR<br>1 session                                                                  | Pain intensity (VAS)<br>• on movement                                     | Climb test<br>Timed Up and Go (TUG)<br>6-minute walk test (6MWT)<br>Knee extensor strengths<br>2-step test<br>Stand-up test in the locomotive syndrome risk test.                              |
| Shoukry and Al-Ansary, 2019 <sup>321</sup> | P | Pr | Procedural pain - during Extracorporeal Shock-Wave Lithotripsy (ESWL) | 60 (26W) | TENS (HF) + IV fentanyl = 30                      | IV fentanyl = 30                                                                                        | Fixed<br>1 treatment<br>Duration not reported but less than 40 mins                               | Pain intensity (VAS)                                                      | Analgesic consumption<br>Modified Post-Anaesthetic Discharge Scoring System<br>adverse effect during or after the procedure<br>Discharge time                                                  |
| Siemens et al., 2020 <sup>322</sup>        | C | Pr | Cancer pain - advanced cancer, inpatients                             | 25 (12W) | TENS (HF) + medication = 20                       | Placebo TENS (0mA) + medication = 20                                                                    | PRN<br>For 1 day<br>Mean $\pm$ SD = 9.1+7.5h for TENS and 7 $\pm$ 5.6 for placebo<br>24 h washout | Pain intensity (NRS)                                                      | Analgesic consumption<br>Brief Pain Inventory (BPI)<br>Edmonton Classification System for Cancer Pain Douleur Neuropathique en 4 Questions<br>7-point verbal pain rating scale<br>EORTC QLQC30 |
| Sikiru et al., 2008 <sup>323</sup>         | P | Pr | Pelvic pain, prostatitis - chronic                                    | 24 (24M) | TENS (HF) + antibiotics = 8                       | Placebo pill + antibiotics = 8<br>Analgesics (Ibuprofen 400mg) + antibiotics (SoC, no TENS control) = 8 | Fixed<br>1 x 20 mins / day x 5 / week x 4 weeks<br>20 sessions                                    | Pain intensity (NRS)                                                      | NIH chronic prostatitis symptom index questionnaire (pain domain)                                                                                                                              |
| Silva et al., 2012 <sup>324</sup>          | P | Pr | Post-op cholecystectomy                                               | 42 (39W) | TENS (HF) + analgesics (Tramadol + Dipyrone) = 21 | Placebo TENS (0mA) + analgesics (Tramadol + Dipyrone) = 21                                              | PRN<br>1 x 30 mins / session as needed                                                            | Pain intensity (VAS, verbal NRS)                                          | Occurrence of nausea and emesis                                                                                                                                                                |
| Silva et al., 2014 <sup>325</sup>          | P | E  | Post-mastectomy pain syndrome – chronic, intercostobrachial           | 18 (18W) | TENS (LF, burst) = 9                              | TENS (MF, acupuncture-like,) = 9                                                                        | Fixed<br>1 x 10-15 mins<br>1 session                                                              | Pain intensity (VAS)                                                      | Electroencephalography (EEG) measures                                                                                                                                                          |
| Sim, 1991 <sup>326</sup>                   | P | Pr | Post-op cholecystectomy                                               | 30 (27W) | TENS (HF) + analgesics (Papaveretum) = 15         | Papaveretum, i.m. on demand (SoC, no TENS control) = 15                                                 | PRN<br>1 x 60 mins / day? x 5 days<br>5 sessions                                                  | Pain intensity (VAS)<br>• Resting pain<br>• Coughing<br>• Deep breathing. | Analgesic consumption<br>Spirometer function                                                                                                                                                   |

08\_OL-TABLE1\_IncludedStudies

|                                        |   |    |                                              |            |                                                           |                                                                                                                                    |                                                                                                     |                                          |                                                                                                                               |
|----------------------------------------|---|----|----------------------------------------------|------------|-----------------------------------------------------------|------------------------------------------------------------------------------------------------------------------------------------|-----------------------------------------------------------------------------------------------------|------------------------------------------|-------------------------------------------------------------------------------------------------------------------------------|
| Siqueira et al., 2019 <sup>327</sup>   | P | Pr | Musculoskeletal pain – behavioural dysphonia | 27 (27W)   | TENS (LF) + vocal training                                | Placebo TENS (0mA) + vocal therapy                                                                                                 | Fixed<br>1 x 20mins / day<br>12 sessions                                                            | Pain intensity (VAS)                     | Self-perception of musculoskeletal pain frequency (4-point Likert scale) and intensity<br>Pressure algometry - Pain Threshold |
| Sloan et al., 1986 <sup>328</sup>      | P | Pr | Rib fracture                                 | 24 (NR)    | TENS (HF) + paracetamol + dihydrocodeine as required = 12 | Naproxen + paracetamol + dihydrocodeine as required (SoC, no TENS control) = 12                                                    | PRN<br>2 post op days                                                                               | Pain intensity (VAS)                     | Pain relief (VAS)<br>Arterial blood assays<br>Peak expiratory flow rate<br>Treatment effectiveness (VAS)                      |
| Smania et al., 2005 <sup>329</sup>     | P | Pr | Myofascial pain syndrome                     | 53 (36W)   | TENS (HF) = 18                                            | Placebo (ultrasound turned off) = 18<br>Repetitive magnetic stimulation = 17                                                       | Fixed<br>1 x 20 mins / day x 5 days / week x 2 weeks<br>10 sessions                                 | Pain intensity (Pain and disability VAS) | Pressure pain threshold (algometry)<br>Range of motion                                                                        |
| Smedley et al., 1988 <sup>330</sup>    | P | Pr | Post-op inguinal herniorrhaphy               | 62 (62W)   | TENS (HF) + Omnopon = 34                                  | Placebo TENS (0mA) + Omnopon = 28                                                                                                  | PRN<br>2 days continuously post op<br>Unclear                                                       | Pain intensity (VAS)                     | Analgesic consumption<br>Expiratory flow                                                                                      |
| Smith et al., 1983 <sup>331</sup>      | P | Pr | Osteoarthritis - knee                        | 30 (20W)   | TENS (HF) = 15                                            | Placebo TENS (0mA) = 15                                                                                                            | Fixed<br>1 x 20 mins / day x 8 occasions over 4 weeks<br>8 sessions                                 | Pain intensity (VAS)                     | Analgesic consumption<br>Pain chart<br>Sleep disturbance (VAS)                                                                |
| Smith et al., 1986 <sup>332</sup>      | P | Pr | Post-caesarean pain                          | 18 (18W)   | TENS (HF) + analgesics = 9                                | Placebo TENS (0mA) + analgesics = 9                                                                                                | PRN<br>Continuous with 15 mins rest for 3 days post up                                              | Pain intensity (5-point scale)           | Analgesic consumption<br>McGill Pain Questionnaire                                                                            |
| Sodipo et al., 1980 <sup>333</sup>     | P | Pr | Post-op                                      | 30 (NR)    | TENS (NR) + analgesics = 15                               | Narcotic medication (SoC, no TENS control) = 15                                                                                    | PRN<br>2 days post op                                                                               | No primary outcome                       | Analgesic consumption<br>Pulmonary function                                                                                   |
| Solak et al., 2007 <sup>334</sup>      | P | Pr | Post-op thoracotomy                          | 40 (8W)    | TENS (LF) + (no morphine PCA) = 20                        | Morphine (PCA) (SoC, no TENS control) = 20                                                                                         | Fixed<br>1 x 30 mins / day ? x 10 days<br>10 sessions                                               | Pain intensity (VAS)                     | Analgesic consumption (Morphine - PCA)<br>Prince Henry pain scale<br>Pulmonary function                                       |
| Solak et al., 2009 <sup>335</sup>      | P | Pr | Post-op coronary bypass grafting             | 100 (13W)  | TENS (HF, continuously) + morphine (PCA) = 25             | Placebo TENS + morphine (PCA) = 25<br>Morphine (PCA)(SoC, no TENS control) = 25<br>TENS (HF, intermittently) + morphine (PCA) = 25 | PRN continuously one day<br>Continuously = on for 24h without break Intermittently = 1h on 1 hr off | Pain intensity (VAS)                     | Analgesic consumption<br>Duration operation, extubation, hospital stay<br>Oximetry<br>Respiratory function                    |
| Sonde et al., 1998 <sup>336</sup>      | P | Pr | Post stroke – shoulder pain                  | 44 (17W)   | TENS (LF) + Physiotherapy (usual care) = 26               | Physiotherapy (SoC, no TENS control) = 18                                                                                          | Fixed<br>1 x 60 mins / day x 5 days / week x 12 weeks<br>60 sessions                                | Pain intensity (VAS)                     | Fugl-Meyer Ashworth scale<br>Autonomy in activities of daily living                                                           |
| Stepanovic et al., 2015 <sup>337</sup> | P | Pr | Post-herpetic neuralgia                      | 222 (133W) | TENS (HF) = 36                                            | Analgesics (SoC, no TENS control) = 38<br>Antiviral agents = 71<br>TENS + antiviral agents = 77                                    | Fixed<br>1 x 30 mins / day<br>10 to 15 sessions                                                     | Pain intensity (VAS)                     | Analgesic consumption<br>Allodynia, hyperalgesia or paraesthesia                                                              |
| Steptoe and Bo, 1984 <sup>338</sup>    | P | Pr | Labour pain                                  | 25 (25W)   | TENS (HF + LF) = 12                                       | Placebo TENS (0mA) = 13                                                                                                            | PRN                                                                                                 | Pain intensity                           | Analgesic consumption                                                                                                         |

O8\_OL-TABLE1\_IncludedStudies

|                                            |   |    |                                                      |            |                                                   |                                                                                                                                                                                                                           |                                                                   |                                                    |                                                                                                                                                                                                    |
|--------------------------------------------|---|----|------------------------------------------------------|------------|---------------------------------------------------|---------------------------------------------------------------------------------------------------------------------------------------------------------------------------------------------------------------------------|-------------------------------------------------------------------|----------------------------------------------------|----------------------------------------------------------------------------------------------------------------------------------------------------------------------------------------------------|
|                                            |   |    |                                                      |            |                                                   |                                                                                                                                                                                                                           | 1 x 30 mins?                                                      |                                                    |                                                                                                                                                                                                    |
| Stratton and Smith, 1980 <sup>339</sup>    | P | Pr | Plantar fasciitis                                    | 26 (NR)    | TENS (HF) + exercise (stretching) + orthoses = 13 | Exercise (stretching) + orthoses (SoC, no TENS control) = 13                                                                                                                                                              | Fixed<br>1 x 20 mins / day x 7 days x 4 weeks<br>28 sessions      | Pain intensity (VAS)                               | Activities of daily living subscale of Foot and Ankle Ability Measure                                                                                                                              |
| Stubbing and Jellicoe, 1988 <sup>340</sup> | P | Pr | Post-op thoracotomy                                  | 40 (12W)   | TENS (HF) + opioids (Papaveretum, i.v.) = 20      | Papaveretum (i.v.) (SoC, no TENS control) = 20                                                                                                                                                                            | PRN<br>for 48 hours                                               | Pain intensity (5-categories)                      | Analgesic consumption<br>Time to transfer to oral analgesia<br>Peak expiratory flow rate                                                                                                           |
| Suh et al., 2015 <sup>341</sup>            | P | Pr | Musculoskeletal pain - (various types, work-related) | 47 (36W)   | TENS (HF) = 24                                    | Placebo TENS = 23 (0mA)                                                                                                                                                                                                   | Fixed<br>1 x 60 mins<br>1 session                                 | Pain intensity (VAS)<br>• resting<br>• on movement | Pressure pain threshold (algometry)<br>Range of motion<br>Fatigue (VAS)<br>• Resting pain<br>• Pain on movement                                                                                    |
| Talbot et al., 2020 <sup>342</sup>         | P | Pr | Knee pain, Patellofemoral pain syndrome              | 130 (29W)  | TENS (HF) + exercise (home programme) = 33        | Exercise (home programme) alone (SoC) = 34<br><br>Neuromuscular electrical stimulation + exercise (home programme) = 33<br><br>Alternating Neuromuscular electrical stimulation and TENS + exercise (home programme) = 30 | Fixed<br>1 x 20 mins / day<br>1 x every 2 days<br>X 9 weeks       | Pain intensity (VAS)                               | Lower Extremity Isometric Strength<br>30-Second Chair Stand Test (30-SCST)<br>Timed Stair Climb Test (SCT)<br>Forward Step-Down Test<br>Six-Minute Timed Walk Test (6-MWT)                         |
| Tantawy et al., 2018 <sup>343</sup>        | P | Pr | Chronic orchialgia                                   | 71 (0W)    | TENS (HF) + analgesic medication = 36             | Analgesic medication (SoC, no TENS control) = 35                                                                                                                                                                          | Fixed<br>1 x 30 mins / day x 5 / week x 4 weeks<br>20 sessions    | Pain intensity (VAS)                               | Pin prick<br>Quality of life                                                                                                                                                                       |
| Taylor et al., 1981 <sup>344</sup>         | C | E  | Osteoarthritis - knee                                | 10 (9W)    | TENS (Freq. PRN) = 10                             | Placebo TENS (0mA) = 10                                                                                                                                                                                                   | PRN<br>1 x 30 to 60 mins or continuously / day 2 weeks at home    | Pain intensity (5-point category scale)            | Analgesic consumption (5 categories)<br>Ambulation (5 categories)                                                                                                                                  |
| Taylor et al., 1983 <sup>345</sup>         | P | Pr | Post op abdominal surgery                            | 77 (45W)   | TENS (HF) + analgesics = 30                       | Placebo TENS (0mA) + analgesics = 22<br>Analgesic medication (SoC, no TENS control) = 25                                                                                                                                  | Fixed<br>1 x 60 mins x 4 / day (q4h) x 3 post days<br>12 sessions | Pain intensity (NRS)                               | Analgesic consumption (Morphine)<br>Physiological depression<br>Patient ambulation<br>Fluid intake                                                                                                 |
| Thakur and Patidar, 2004 <sup>346</sup>    | P | Pr | Labour pain                                          | 300 (300W) | TENS (HF) = 100                                   | No treatment = 100<br>Tramadol (100mg) = 100                                                                                                                                                                              | PRN                                                               | No primary outcome                                 | Pain relief (5 categories)<br>Time taken for onset of analgesic action<br>Duration of analgesia                                                                                                    |
| Thomas et al., 1988 <sup>347</sup>         | P | Pr | Labour pain                                          | 280 (280W) | TENS (NR) = 132                                   | Placebo TENS (0mA) = 148                                                                                                                                                                                                  | PRN                                                               | Pain intensity (VAS)                               | Analgesic consumption<br>Labour questionnaire                                                                                                                                                      |
| Thomas et al., 1995 <sup>348</sup>         | C | E  | Dysmenorrhea - primary                               | 29 (29W)   | TENS (HF) = 12                                    | Placebo TENS (0mA) = 12<br>TENS (LF) = 12                                                                                                                                                                                 | Fixed<br>1 x 20 mins / day x 2 days<br>2 sessions                 | Pain intensity (VAS)                               | Analgesic consumption<br>Patients perception of improvement (3 category scale)<br>Blood loss (3 category scale)<br>Nausea and vomiting (4 category scale)<br>Hours of work lost (3 category scale) |

O8\_OL-TABLE1\_IncludedStudies

|                                           |   |    |                                        |          |                                                            |                                                                                                                                              |                                                                                                                                    |                                                                   |                                                                                                                                                                                                                 |
|-------------------------------------------|---|----|----------------------------------------|----------|------------------------------------------------------------|----------------------------------------------------------------------------------------------------------------------------------------------|------------------------------------------------------------------------------------------------------------------------------------|-------------------------------------------------------------------|-----------------------------------------------------------------------------------------------------------------------------------------------------------------------------------------------------------------|
| Thorsteinsson et al., 1978 <sup>349</sup> | C | E  | Chronic pain                           | 93 (53W) | TENS (NR) = 93                                             | Placebo TENS = 93 (0mA)                                                                                                                      | Fixed<br>1 x treatment at each of the following (i) at painful site (ii) over main nerve bundle (iii) at remote site<br>3 sessions | No primary outcomes                                               | Pain relief (4-categories)<br>• Minnesota<br>• Multiphasic<br>• Personality Inventory<br>• Duration of pain relief                                                                                              |
| Tilak et al., 2016 <sup>350</sup>         | P | Pr | Phantom limb pain                      | 26 (3W)  | TENS (LF, burst) = 13                                      | MVF = 13                                                                                                                                     | Fixed<br>1 x 20 mins x 4 days<br>4 sessions                                                                                        | Pain intensity (VAS)                                              | Universal pain score                                                                                                                                                                                            |
| Tokuda et al., 2014 <sup>351</sup>        | P | Pr | Post-op abdominal                      | 48 (19W) | TENS (HF) + Fentanyl (PCA) + No TENS (Control) = 16        | Placebo TENS (fading) + Fentanyl (PCA) = 16<br>Fentanyl (PCA) (SoC, no TENS control) = 16                                                    | PRN<br>1 x 60 min/day x 3 days                                                                                                     | Pain intensity (VAS)<br>• Resting pain<br>• Coughing<br>• Seating | Pulmonary Functions                                                                                                                                                                                             |
| Tonella et al., 2006 <sup>352</sup>       | P | E  | Post-op abdominal                      | 48 (20W) | TENS (HF) + usual care (analgesics and physiotherapy) = NR | Placebo TENS (0mA) + usual care (analgesics and physiotherapy) = NR<br>Usual care ((analgesics and physiotherapy) SoC, no TENS control) = NR | Fixed<br>1 x 30 mins for one day?<br>1 session                                                                                     | Pain intensity (VAS)                                              | Analgesic consumption                                                                                                                                                                                           |
| Topuz et al., 2004 <sup>353</sup>         | P | Pr | Back pain - chronic low non-specific   | 60 (41W) | TENS (HF, conventional) = 15                               | Placebo TENS (0mA) = 12<br>TENS (LF) = 15<br>Percutaneous neuromodulation therapy = 13                                                       | Fixed<br>1 x 20 min/day x 5 days x 2 weeks<br>10 sessions                                                                          | Pain intensity (VAS)<br>• Resting<br>• On movement                | Low back pain outcome scale<br>Oswestry disability index<br>Beck Depression Inventory                                                                                                                           |
| Tosato et al., 2007 <sup>354</sup>        | P | E  | Temporomandibular disorders            | 20 (20W) | TENS (NR) = 10                                             | Massage therapy = 10                                                                                                                         | Fixed<br>1 x 30 mins<br>1 session                                                                                                  | Pain intensity (VAS)                                              | Electromyography (EMG) measures                                                                                                                                                                                 |
| Treacy, 1999 <sup>355</sup>               | P | Pr | Bruxism                                | 23 (10W) | TENS (LF) = 8                                              | Placebo TENS (0mA) = 8<br>Relaxation (muscular awareness training) = 8                                                                       | Fixed<br>20 to 30 mins / day x 2 / week x 4 months<br>20 sessions                                                                  | No primary outcome                                                | Muscle pain from physical examination<br>Degree of discomfort (7-point scale)<br>EMG<br>Cognitive-Somatic Anxiety Questionnaire<br>Beck Depression Inventory<br>Multidimensional health locus of control scales |
| Tsen et al., 2000 <sup>356</sup>          | P | Pr | Labour pain                            | 40 (40W) | TENS (MF) = NR                                             | Placebo TENS (0mA) = NR                                                                                                                      | PRN<br>During labour<br>1 session                                                                                                  | Pain intensity (VAS)                                              | Duration of analgesia<br>Pin Prick                                                                                                                                                                              |
| Tsen et al., 2001 <sup>357</sup>          | P | Pr | Labour pain                            | 40 (40W) | TENS (MF) = NR                                             | Placebo TENS (0mA) = NR                                                                                                                      | PRN<br>During labour<br>1 session                                                                                                  | Pain intensity (VAS)                                              | Duration of analgesia<br>Pin Prick                                                                                                                                                                              |
| Tsukayama et al., 2002 <sup>358</sup>     | P | Pr | Back pain - chronic low non-specific   | 20 (16W) | TENS (LF) = 10                                             | Electroacupuncture = 9                                                                                                                       | Fixed<br>1 x 15 mins / day x 2 / week x 2 weeks<br>4 sessions                                                                      | Pain intensity (VAS)                                              | Back pain profile<br>Adverse events                                                                                                                                                                             |
| Tucker et al., 2015 <sup>359</sup>        | P | Pr | Procedural pain - bone marrow sampling | 70 (32W) | TENS (HF) = 35                                             | Placebo TENS (sub threshold) = 35                                                                                                            | Fixed                                                                                                                              | Pain intensity (NRS)                                              | Treatment perception questionnaire                                                                                                                                                                              |

O8\_OL-TABLE1\_IncludedStudies

|                                           |   |    |                                         |          |                                                                                  |                                                                                                                  |                                                                                                   |                                                                                            |                                                                                                      |
|-------------------------------------------|---|----|-----------------------------------------|----------|----------------------------------------------------------------------------------|------------------------------------------------------------------------------------------------------------------|---------------------------------------------------------------------------------------------------|--------------------------------------------------------------------------------------------|------------------------------------------------------------------------------------------------------|
|                                           |   |    |                                         |          |                                                                                  |                                                                                                                  | throughout procedure<br>1 session                                                                 |                                                                                            |                                                                                                      |
| Tugay et al., 2007 <sup>360</sup>         | P | E  | Dysmenorrhea - primary                  | 32 (32W) | TENS (HF) = 17                                                                   | IFT = 15                                                                                                         | Fixed<br>1 x 20 mins<br>1 session                                                                 | Pain intensity (VAS)<br>• Menstrual pain<br>• Referred lower limbs pain<br>• Low back pain | None                                                                                                 |
| Tulgar et al., 1991 <sup>361</sup>        | C | E  | Several painful conditions              | 27 (11W) | TENS (HF, conventional) = 27                                                     | TENS (LF, burst = 27<br>TENS (modulated frequency) = 27                                                          | Fixed<br>1 x 30 mins / day<br>switch next day 3 days                                              | Pain intensity (VAS)                                                                       | None                                                                                                 |
| Tulgar et al., 1991 <sup>362</sup>        | C | E  | Several painful conditions              | 14 (7W)  | TENS (HF, conventional) = 14                                                     | TENS (LF, burst) = 27<br>TENS (high rate frequency modulation) = 27<br>TENS (low rate frequency modulation) = 27 | Fixed<br>1 x 20 mins / day<br>switch each day 4 days equals 4 tests<br>1 session                  | Pain intensity (VAS)                                                                       | Duration of pain relief                                                                              |
| Unterrainer et al., 2010 <sup>363</sup>   | P | Pr | Post-op lumbar                          | 38 (19W) | TENS + PCA = 13                                                                  | Placebo TENS + PCA (control) = 11<br><br>Placebo TENS + PCA (Pre) + TENS + PCA (post) = 14                       | Fixed<br>1 x 30 mins pre-op +<br>1 x 8 hours post-op<br>+ 1 x 30 mins post-op day 1<br>2 sessions | Pain intensity (VAS)                                                                       | Analgesic consumption<br>Mini Mental State Examination<br>The Short Cognitive Performance Test       |
| Unterrainer et al., 2012 <sup>364</sup>   | P | Pr | Post-op lumbar interbody fusion         | 35 (17W) | TENS (HF) + placebo PCA = 17                                                     | PCA (piritramide) + Placebo TENS (0mA) (SoC, sham TENS control) = 18                                             | Fixed<br>1 x 30 mins pre-op<br>1 x 24 hours post up<br>1 session                                  | Pain intensity (VAS)                                                                       | Analgesic consumption (PCA - rescue meds)                                                            |
| Upton et al., 2017 <sup>365</sup>         | C | E  | Peripheral diabetic neuropathy          | 5        | TENS (HF, conventional) = 5                                                      | TENS (LF, acupuncture-like) = 5                                                                                  | Fixed<br>1 x 30 mins / day x<br>10 days<br>10 sessions                                            | Pain intensity (NRS)                                                                       | McGill Pain Questionnaire<br>Mechanical detection threshold<br>Patient's Global Impression of Change |
| Vaidya, 2018 <sup>366</sup>               | P | Pr | Pregnancy induced posterior pelvic pain | 30 (30W) | TENS (HF) = 15                                                                   | Mobilisation of sacroiliac Joint = 15                                                                            | Fixed<br>1 x 30 mins / day x 3 / week<br>5 sessions                                               | Pain intensity (VAS)                                                                       | Roland Morris disability Questionnaire                                                               |
| Vaillancourt et al., 2019 <sup>367</sup>  | P | Pr | Chronic pain - Various                  | 18 (18W) | TENS (HF) + exercise = 7                                                         | Placebo TENS (0mA) + exercise = 8                                                                                | Fixed<br>2 x 45mins / session<br>x 2 / week<br>x 4 weeks,<br>8 sessions                           | Pain intensity (NRS)                                                                       | Short-Form<br>McGill Pain Questionnaire<br>Brief Pain Inventory<br>Beck Depression Inventory         |
| Valenza et al., 2016 <sup>368</sup>       | P | E  | Knee pain - anterior                    | 84 (52W) | TENS = 28                                                                        | No treatment = 28<br>Stretching = 28                                                                             | Fixed<br>1 x 20 mins<br>1 session                                                                 | No primary outcome                                                                         | Analgesic consumption<br>Roland Morris disability score<br>Pressure algometry                        |
| van der Ploeg et al., 1996 <sup>369</sup> | P | Pr | Labour pain                             | 94 (94W) | TENS (HF, continuous + LF, burst) + analgesics (pethidine/promethazine PCA) = 46 | Placebo TENS (NR) + analgesics (pethidine/promethazine, PCA) = 48                                                | PRN                                                                                               | Pain intensity (VAS)                                                                       | Duration of stages of labour<br>Mode of delivery,<br>Foetal status<br>Apgar scores                   |

08\_OL-TABLE1\_IncludedStudies

|                                           |   |    |                                                     |          |                                                                          |                                                                                                                                                                             |                                                                |                                                                                                         |                                                                                                                                                                                                          |
|-------------------------------------------|---|----|-----------------------------------------------------|----------|--------------------------------------------------------------------------|-----------------------------------------------------------------------------------------------------------------------------------------------------------------------------|----------------------------------------------------------------|---------------------------------------------------------------------------------------------------------|----------------------------------------------------------------------------------------------------------------------------------------------------------------------------------------------------------|
| van der Spank et al., 2000 <sup>370</sup> | P | E  | Labour pain                                         | 59 (94W) | TENS (HF, continuous, burst) + Epidural (drug NR) = 24                   | Epidural (drug NR) (SoC, no TENS control) = 35                                                                                                                              | PRN                                                            | Pain intensity (VAS)                                                                                    | Analgesic consumption<br>TENS satisfaction questionnaire                                                                                                                                                 |
| Vance et al., 2012 <sup>371</sup>         | P | E  | Osteoarthritis - knee                               | 75 (46W) | TENS (HF) = 25                                                           | Placebo TENS (Fading) = 25<br>TENS (LF) = 25                                                                                                                                | Fixed<br>1 x 40 to 50 mins<br>1 session                        | Pain intensity (VAS)<br>• Rest<br>• On movement (Timed-up-and-go)<br>• Heat evoked - temporal summation | Quantitative sensory testing<br>Pressure algometry, Cutaneous mechanical pain threshold, pressure pain threshold (PPT), heat pain threshold, heat temporal summation]<br>Timed up and go                 |
| Vitalii and Oleg, 2014 <sup>372</sup>     | P | Pr | Neuropathic pain associated with spinal cord injury | 21 (2W)  | TENS (LF) + gabapentin = 11                                              | Placebo TENS (no current stimulation) + gabapentin = 10                                                                                                                     | Fixed<br>1 x 30 mins / day x 10 days<br>10 sessions            | Pain intensity (VAS)                                                                                    | Analgesic consumption                                                                                                                                                                                    |
| Vrouva et al., 2019 <sup>373</sup>        | P | Pr | Rotator cuff                                        | 42 (20W) | TENS (HF) + kinesiotherapy                                               | microcurrent electrical nerve stimulation + kinesiotherapy                                                                                                                  | Fixed<br>1 x 20 mins / day x 5 / week x 3 weeks<br>15 sessions | Pain intensity (NRS)                                                                                    | Shoulder pain and disability index (SPADI)<br>EuroQoL-5 (Quality of life)                                                                                                                                |
| Walker et al., 1991 <sup>374</sup>        | P | Pr | Post-op (rehabilitation - total knee arthroplasty)  | 48 (NR)  | TENS (HF) + continuous passive motion + analgesic (various opioids) = 18 | TENS (subthreshold) + continuous passive motion + analgesics (various opioids) = 18<br>Continuous passive motion + analgesics (various opioids) (SoC, no TENS control) = 12 | PRN<br>continuously 3 days post op                             | No primary outcome                                                                                      | Analgesic consumption                                                                                                                                                                                    |
| Wang et al., 2009 <sup>375</sup>          | C | E  | Dysmenorrhea - primary                              | 21 (21W) | TENS (HF) = 21                                                           | Placebo TENS (0mA) = 21                                                                                                                                                     | Fixed<br>1 to 2 x 30 mins / day x 2 days                       | Pain intensity (NRS, 11-point scale)                                                                    | Pain location<br>Autonomic and related symptoms questionnaire<br>SF-36                                                                                                                                   |
| Warfield et al., 1985 <sup>376</sup>      | P | Pr | Post-op thoracotomy                                 | 24 (NR)  | TENS (NR) + opioids = 12                                                 | Placebo TENS (0mA) + opioids = 12                                                                                                                                           | PRN<br>Continuous stimulation x ? days                         | Pain intensity (NRS)                                                                                    | Analgesic consumption<br>Ability to tolerate chest physical therapy (3 categories)<br>Recovery room stay                                                                                                 |
| Warke et al., 2004 <sup>377</sup>         | P | Pr | Back pain – low, multiple sclerosis                 | 15 (NR)  | TENS (HF) = 5                                                            | Placebo TENS (0mA) = 5<br>TENS (LF) = 5                                                                                                                                     | Fixed<br>1 x > 45 mins/day x 6 weeks<br>>42 sessions           | Pain intensity (VAS)                                                                                    | Roland Morris Disability Questionnaire<br>Barthel Activities of Daily Living<br>Rivermead Mobility Index<br>McGill Pain Questionnaire<br>Leeds Multiple Sclerosis Quality of Life Questionnaire<br>SF-36 |
| Warke et al., 2006 <sup>378</sup>         | P | Pr | Back pain – low, multiple sclerosis                 | 90 (69W) | TENS (HF) = 30                                                           | Placebo TENS (0mA) = 30<br>TENS (LF) = 30                                                                                                                                   | PRN<br>>2 x 45 mins / day x 6 weeks<br>>42 sessions            | Pain intensity (VAS)                                                                                    | Analgesic consumption<br>McGill Pain Questionnaire<br>Roland Morris Disability Questionnaire<br>Barthel Index<br>Rivermead Mobility Index<br>Multiple Sclerosis Quality of Life-54 Instrument            |

O8\_OL-TABLE1\_IncludedStudies

|                                            |   |    |                                                             |            |                                                |                                                                                                       |                                                                |                                                                   |                                                                                                     |
|--------------------------------------------|---|----|-------------------------------------------------------------|------------|------------------------------------------------|-------------------------------------------------------------------------------------------------------|----------------------------------------------------------------|-------------------------------------------------------------------|-----------------------------------------------------------------------------------------------------|
| Yameen et al., 2011 <sup>379</sup>         | P | Pr | Neuralgia - trigeminal                                      | 31 (20W)   | TENS (HF, continuous pattern) = 16             | TENS (LF, Burst) = 15                                                                                 | PRN<br>x 3 weeks                                               | Pain intensity (VAS)                                              | None                                                                                                |
| Yesil et al., 2018 <sup>380</sup>          | P | Pr | Neck pain - chronic non-specific                            | 81 (56W)   | TENS (HF) + Exercise (neck stabilisation) = 27 | Exercise (neck stabilisation) (SoC, no TENS control) = 26<br>IFT + Exercise (neck stabilisation) = 27 | Fixed<br>1 x 25 mins / day x 5 / week x 3 weeks<br>15 sessions | Pain intensity (VAS)                                              | Range of motion<br>Neck Disability index<br>SF-36<br>Beck Depression Inventory                      |
| Yilmaz et al., 2020 <sup>381</sup>         | P | Pr | Post op - inguinal herniorrhaphy                            | 52 (3W)    | TENS (HF) + intramuscular NSAID = 26           | Placebo TENS (0mA) + intramuscular NSAID = 26                                                         | Fixed<br>5 x 30 mins / day x 1 day<br>5 sessions               | Pain intensity (VAS)                                              | Analgesic consumption,<br>Newcastle Satisfaction with Nursing Care Scale<br>Vital signs             |
| Yilmazer et al., 2012 <sup>382</sup>       | P | Pr | Procedural pain - office endometrial biopsy                 | 65 (65W)   | TENS (NR) + Oral naproxen = 33                 | Placebo TENS + oral naproxen (0mA) = 32                                                               | Fixed<br>10 mins pre and during procedure<br>1 session         | Pain intensity (VAS)                                              | Blood pressure and pulse<br>Vasovagal symptoms questionnaire                                        |
| Yokoyama et al., 2004 <sup>383</sup>       | P | Pr | Back pain - chronic low non-specific                        | 53 (30W)   | TENS (HF) + analgesics = 18                    | Percutaneous electrical nerve stimulation + analgesics = 18<br>PENS + TENS + analgesics = 17          | Fixed<br>1 x 20 mins / day x 2 / week x 8 weeks<br>16 sessions | Pain intensity (VAS)                                              | Analgesic consumption<br>Degree of impairment (5 categories)                                        |
| Yoshimizu et al., 2012 <sup>384</sup>      | C | E  | Neck pain - chronic non-specific ('Shoulder and neck pain') | 90 (52W)   | TENS (LF) = 90                                 | Electroacupuncture = 90                                                                               | Fixed<br>1 x 15 mins<br>1 session                              | Pain intensity (VAS)                                              | SF-36                                                                                               |
| Yüksel et al., 2019 <sup>385</sup>         | P | E  | Fibromyalgia                                                | 42 (NR)    | TENS (HF) = 21                                 | Acupuncture = 21                                                                                      | Fixed<br>1 x 20 mins<br>1 session                              | Pain intensity (VAS)                                              | Pressure algometry pain threshold<br>Beck Depression Inventory<br>Fibromyalgia Impact Questionnaire |
| Yurtkuran and Kocagil, 1999 <sup>386</sup> | P | Pr | Osteoarthritis - knee                                       | 100 (91W)  | TENS (LF) = 25                                 | Electroacupuncture = 25<br>Ice massage = 25<br>Placebo TENS (no current) = 25                         | Fixed<br>1 x 20 mins / day x 5 / week x 2 weeks<br>10 sessions | Pain intensity (5 categories)<br>• Present pain<br>• Overall pain | 50-foot walking time<br>Quadriceps muscle strength<br>Range of motion                               |
| Zakariaee et al., 2019 <sup>387</sup>      | P | Pr | Post op - episiotomy                                        | 120 (120W) | TENS (HF) + routine care = 40                  | Placebo TENS (0mA) + routine care = 40<br>Routine care = 40                                           | Fixed<br>1 x 60 mins<br>1 session                              | Pain intensity (NRS)                                              | TENS' complications satisfaction rate                                                               |
| Zhang et al., 2020 <sup>388</sup>          | P | E  | Chronic TMJ pain (TMJ disc displacement without reduction)  | 20 (10W)   | TENS (LF, AL-TENS) = 10                        | Placebo TENS (0mA) = 10                                                                               | Fixed<br>1 x 45 mins<br>1 session                              | Pain intensity (NRS)<br>• Movement – jaw opening and closing      | Mandibular motor function using Cranio-Mandibular Evaluation System                                 |
| Zhou et al., 2018 <sup>389</sup>           | P | Pr | Hemiplegic shoulder pain                                    | 90 (19W)   | TENS (HF) + rehab programme = 32               | NMES + rehabilitation programme = 31<br>Conventional rehab programme (SoC, no TENS control) = 18      | Fixed<br>1 x 60 mins / day x 5 days x 4 weeks<br>20 sessions   | Pain intensity (NRS)                                              | Fugl-Meyer<br>Modified Ashworth scale<br>Barthel Index<br>Stroke specific quality of life scale     |

## 08\_OL-TABLE1\_IncludedStudies

- Design: P = Parallel group; C = Crossover.
- Type: E = Predominantly Explanatory; Pr = Predominantly Pragmatic (mixed).
- Sample: W = women
- Primary TENS intervention group as selected by reviewers: Size of sample arm '=' on enrolment; HF = high frequency >10 pps; LF = low frequency < 10pps or LF burst pattern. AF = alternating frequency, MF = modulated frequency; VF = various frequencies; burst = burst pattern of pulse delivery; HI = High Intensity TENS
- Comparison Intervention(s). Listed in reviewers' order of priority; number in trial arm '='; Placebo TENS (0mA – sham device or dead batteries); Fading = TENS current administered briefly and then turned off e.g. applied for 30 seconds and then drifted off to 0mA over a 15 second time frame; Active = Placebo TENS used currents above 0mA, >SDT- infrequent pulses = current above sensory detection threshold and time between pulses modified so that they were delivered very infrequently (e.g. inter-pulse interval adjusted from 330 ms to 33 s to avoid any analgesic effect), >SDT- TENS remote = current above sensory detection threshold and delivered at a site considered to be completely unrelated to the site of the pain; categorised as considered as standard of care (SoC)
- TENS regimen: Fixed = regimen either delivered as such or advice given to patient on regimen to use themselves; PRN = 'pro re nata', when necessary; Extracted elements of regimen as min. each session / no. sessions / day / session days / week / weeks / course of treatment (no. of TENS sessions);
- Primary outcome measures in relation to this review: Pain intensity as dichotomous or continuous data
- Secondary outcomes: Analgesic consumption – general term to encompass any time of measurement associated with analgesic medication
- Other Abbreviations: IFT=Interferential current therapy; NSAID = Non-Steroidal Anti-Inflammatory Drugs; PENS = Percutaneous electrical nerve stimulation, TONS = transcutaneous occipital nerve stimulation EA = electroacupuncture; VAS = visual analogue scale; NRS = Numerical rating scale; PCA = Patient controlled analgesia; BPI = Brief Pain Inventory LANSS = Leeds Assessment of Neuropathic Symptoms and Signs; WOMAC = Western Ontario and McMaster Universities Osteoarthritis Index; NR = Not reported

**REFERENCES – INCLUDED STUDIES\***

\*Note: Reference numbering in this list relates only to studies cited in this table

1. Abbasi AA, Shehzad M, Hussain A. Transcutaneous electrical nerve encouragement by way of the adjunct to non-steroidal unwilling-inflammatory medicines for aching management throughout pleurodesis. *Indo American Journal of Pharmaceutical Sciences* 2019; 6(6): 12943-7.
2. Abelson K, Langely GB, Sheppard H. Transcutaneous electrical nerve stimulation in rheumatoid arthritis. *New Zealand Medical Journal* 1983; 96(727): 156-8.
3. Abreu EA, Santos JDMd, Ventura PLJRD. Efetividade da eletroestimulação nervosa transcutânea no alívio da dor durante o trabalho de parto: um ensaio clínico controlado. 2010; 11(4): 313-8.
4. Acedo AA, Luduvic Antunes AC, Barros dos Santos A, et al. Upper trapezius relaxation induced by TENS and interferential current in computer users with chronic nonspecific neck discomfort: An electromyographic analysis. *Journal of Back and Musculoskeletal Rehabilitation* 2015; 28(1): 19-24.
5. Adedoyin RA, Olaogun MOB, Oyeyemi AL. Transcutaneous electrical nerve stimulation and interferential current combined with exercise for the treatment of knee osteoarthritis: a randomised controlled trial. *Hong Kong Physiotherapy Journal* 2005; 23: 13-9.
6. Ahmed MT. Effect of transcutaneous electrical nerve stimulation on postoperative pain after inguinal hernia repair: A randomized placebo-controlled trial. [Turkish]. *Turkiye Fiziksel Tip ve Rehabilitasyon Dergisi* 2010; 56(4): 170-6.
7. Ahmed GM, Maher EA, Elnassag BAEMR, Sayed HM, Kabbash SI. Effects of repetitive transcranial magnetic stimulation versus transcutaneous electrical nerve stimulation to decrease diabetic neuropathic pain. *International Journal of Therapy and Rehabilitation* 2020; 27(2).
8. Alcidi L, Beneforti E, Maresca M, Santosuosso U, Zoppi M. Low power radiofrequency electromagnetic radiation for the treatment of pain due to osteoarthritis of the knee. *Reumatismo* 2007; 59(2): 140-5.
9. Ali J, Yaffe CS, Serrette C. The effect of transcutaneous electric nerve stimulation on postoperative pain and pulmonary function. *Surgery* 1981; 89(4): 507-12.
10. Alizade MH, Ahmadzad S. A comparison of exercise therapy and transcutaneous electrical nerve stimulation for the treatment of chronic low back pain. *World J Sport Sci* 2009; 2(1): 43-7.
11. Allais G, De Lorenzo C, Quirico PE, et al. Non-pharmacological approaches to chronic headaches: Transcutaneous electrical nerve stimulation, lasertherapy and acupuncture in transformed migraine treatment. *Neurological Sciences* 2003; 24(SUPPL. 2): S138-S42.
12. Alm WA, Gold ML, Weil LS. Evaluation of transcutaneous electrical nerve stimulation (TENS) in podiatric surgery. *Journal of the American Podiatry Association* 1979; 69(9): 537-42.
13. Al-Smadi J, Warke K, Wilson I, et al. A pilot investigation of the hypoalgesic effects of transcutaneous electrical nerve stimulation upon low back pain in people with multiple sclerosis. *Clinical Rehabilitation* 2003; 17(7): 742-9.



## 08\_OL-TABLE1\_IncludedStudies

14. Altay F, Durmus D, Cantürk F. Effects of TENS on pain, disability, quality of life and depression in patients with knee osteoarthritis. *Turkish Journal of Rheumatology* 2010; 25(3): 116-21.
15. Alvarez-Arenal A, Junquera LM, Fernandez JP, Gonzalez I, Olay S. Effect of occlusal splint and transcutaneous electric nerve stimulation on the signs and symptoms of temporomandibular disorders in patients with bruxism. *Journal of Oral Rehabilitation* 2002; 29(9): 858-63.
16. Alves Silverio KC, Brasolotto AG, Thais Donalson Siqueira L, Carneiro CG, Fukushima AP, Roberto de Jesus Guirro R. Effect of application of transcutaneous electrical nerve stimulation and laryngeal manual therapy in dysphonic women: clinical trial. *Journal of Voice* 2015; 29(2): 200-8.
17. Amer-Cuenca JJ, Goicoechea C, Girona-Lopez A, et al. Pain relief by applying transcutaneous electrical nerve stimulation (TENS) during unsedated colonoscopy: a randomized double-blind placebo-controlled trial. *European Journal of Pain* 2011; 15(1): 29-35.
18. AminiSaman J, Karimpour H, Hemmatpour B, Mohammadi S, Darvishi S, Kawyannejad R. Effect of TENS on the Pain Intensity during Insertion of Needle in Patients Undergoing Spinal anesthesia: A Randomized Controlled Study. *Journal of Acupuncture and Meridian Studies* 2020.
19. Angulo DL, Colwell Jr CW. Use of postoperative TENS and continuous passive motion following total knee replacement. *Journal of Orthopaedic and Sports Physical Therapy* 1990; 11(12): 599-604.
20. Ardic F, Sarhus M, Topuz O. Comparison of two different techniques of electrotherapy on myofascial pain. *Journal of Back and Musculoskeletal Rehabilitation* 2002; 16(1): 11-6.
21. Arvidsson I, Eriksson E. Postoperative TENS pain relief after knee surgery: objective evaluation. *Orthopedics* 1986; 9(10): 1346-51.
22. Asgari Z, Tavoli Z, Hosseini R, et al. A comparative Study between Transcutaneous Electrical Nerve Stimulation and Fentanyl to Relieve Shoulder Pain during Laparoscopic Gynecologic Surgery under Spinal Anesthesia: A Randomized Clinical Trial. *Pain Research and Management* 2018; 2018: 9715142.
23. Atamaz FC, Durmaz B, Baydar M, et al. Comparison of the efficacy of transcutaneous electrical nerve stimulation, interferential currents, and shortwave diathermy in knee osteoarthritis: a double-blind, randomized, controlled, multicenter study. *Archives of Physical Medicine and Rehabilitation* 2012; 93(5): 748-56.
24. Aydin G, Tomruk S, Keles I, Demir SO, Orkun S. Transcutaneous electrical nerve stimulation versus baclofen in spasticity: Clinical and electrophysiologic comparison. *American Journal of Physical Medicine and Rehabilitation* 2005; 84(8): 584-92.
25. Azatcam G, Atalay NS, Akkaya N, et al. Comparison of effectiveness of Transcutaneous Electrical Nerve Stimulation and Kinesio Taping added to exercises in patients with myofascial pain syndrome. *Journal of Back and Musculoskeletal Rehabilitation* 2017; 30(2): 291-8.
26. Báez-Suárez A, Martín-Castillo E, García-Andújar J, García-Hernández J, Quintana-Montesdeoca MP, Loro-Ferrer JF. Evaluation of different doses of transcutaneous nerve stimulation for pain relief during labour: a randomized controlled trial. *Trials* 2018; 19(1): 652.
27. Bai HY, Bai HY, Yang ZQ. Effect of transcutaneous electrical nerve stimulation therapy for the treatment of primary dysmenorrhea. *Medicine* 2017; 96(36): e7959.
28. Baki ED, Oz G, Kokulu S, et al. Comparison of Transcutaneous Electrical Nerve Stimulation and Paravertebral Block for Postthoracotomy Pain Relief. *The Thoracic and Cardiovascular Surgeon* 2015; 63(6): 514-8.
29. Ballegaard S, Christophersen S, Dawids S, Hesse J, Olsen N. Acupuncture and transcutaneous electric nerve stimulation in the treatment of pain associated with chronic pancreatitis. A randomized study. *Scand J Gastroenterol* 1985; 20(10): 1249-54.
30. Barbarisi M, Pace MC, Passavanti MB, et al. Pregabalin and transcutaneous electrical nerve stimulation for postherpetic neuralgia treatment. *The Clinical Journal of Pain* 2010; 26(7): 567-72.
31. Barker R, Lang T, Steinlechner B, et al. Transcutaneous electrical nerve stimulation as prehospital emergency interventional care: Treating acute pelvic pain in young women. *Neuromodulation* 2006; 9(2): 136-42.
32. Barker KL, Elliott CJ, Sackley CM, Fairbank JC. Treatment of chronic back pain by sensory discrimination training. A Phase I RCT of a novel device (FairMed) vs. TENS. *BMC Musculoskeletal Disorders* 2008; 9: 97.
33. Başkurt Z, Başkurt F, Özcan A, Yılmaz Ö. The immediate effects of heat and TENS on pressure pain threshold and pain intensity in patients with Stage I shoulder impingement syndrome. *The Pain Clinic* 2006; 18(1): 81-5.
34. Bayindir O, Paker T, Akpınar B, Erenturk S, Askin D, Aytac A. Use of transcutaneous electrical nerve stimulation in the control of postoperative chest pain after cardiac surgery. *Journal of Cardiothoracic and Vascular Anesthesia* 1991; 5(6): 589-91.
35. Beckwée D, Bautmans I, Lefeber N, Lievens P, Scheerlinck T, Vaes P. Effect of Transcutaneous Electric Nerve Stimulation on Pain after Total Knee Arthroplasty: a Blind Randomized Controlled Trial. *Journal of Knee Surgery* 2018; 31(2): 189-96.

## 08\_OL-TABLE1\_IncludedStudies

36. Benedetti F, Amanzio M, Casadio C, et al. Control of postoperative pain by transcutaneous electrical nerve stimulation after thoracic operations. *The Annals of Thoracic Surgery* 1997; 63(3): 773-6.
37. Bennett MI, Johnson MI, Brown SR, Radford H, Brown JM, Searle RD. Feasibility study of Transcutaneous Electrical Nerve Stimulation (TENS) for cancer bone pain. *The Journal of Pain* 2010; 11(4): 351-9.
38. Bergeron-Vezina K, Filion C, Couture C, Vallee E, Laroche S, Leonard G. Adjusting Pulse Amplitude During Transcutaneous Electrical Nerve Stimulation Does Not Provide Greater Hypoalgesia. *Journal of Alternative and Complementary Medicine* 2018; 24(3): 262-7.
39. Bertalanffy A, Kober A, Bertalanffy P, et al. Transcutaneous electrical nerve stimulation reduces acute low back pain during emergency transport. *Academic Emergency Medicine* 2005; 12(7): 607-11.
40. Bi X, Lv H, Chen BL, Li X, Wang XQ. Effects of transcutaneous electrical nerve stimulation on pain in patients with spinal cord injury: a randomized controlled trial. *Journal of Physical Therapy Science* 2015; 27(1): 23-5.
41. Bilgili A, Cakir T, Dogan SK, Ercalik T, Filiz MB, Toraman F. The effectiveness of transcutaneous electrical nerve stimulation in the management of patients with complex regional pain syndrome: A randomized, double-blinded, placebo-controlled prospective study. *Journal of Back and Musculoskeletal Rehabilitation* 2016; 29(4): 661-71.
42. Binder P, Gustafsson A, Uvnas-Moberg K, Nissen E. Hi-TENS combined with PCA-morphine as post caesarean pain relief. *Midwifery* 2011; 27(4): 547-52.
43. Bjersa K, Andersson T. High frequency TENS as a complement for pain relief in postoperative transition from epidural to general analgesia after pancreatic resection. *Complementary Therapies in Clinical Practice* 2014; 20(1): 5-10.
44. Bjersa K, Jildenstaal P, Jakobsson J, Egardt M, Fagevik Olsen M. Adjunct High Frequency Transcutaneous Electric Stimulation (TENS) for Postoperative Pain Management during Weaning from Epidural Analgesia Following Colon Surgery: Results from a Controlled Pilot Study. *Pain Management Nursing* 2015; 16(6): 944-50.
45. Bloodworth DM, Nguyen BN, Garver W, et al. Comparison of stochastic vs. conventional transcutaneous electrical stimulation for pain modulation in patients with electromyographically documented radiculopathy. *American journal of Physical Medicine and Rehabilitation* 2004; 83(8): 584-91.
46. Bolat MS, Cinar O, Asci R, Buyukalpelli R. A novel method for pain control: infiltration free local anesthesia technique (INFLATE) for transrectal prostatic biopsy using transcutaneous electrical nerve stimulation (TENS). *International Urology and Nephrology* 2019; 51(12): 2119-26.
47. Bono F, Salvino D, Mazza MR, et al. The influence of ictal cutaneous allodynia on the response to occipital transcutaneous electrical stimulation in chronic migraine and chronic tension-type headache: a randomized, sham-controlled study. *Cephalalgia* 2015; 35(5): 389-98.
48. Borjesson M, Eriksson P, Dellborg M, Eliasson T, Mannheimer C. Transcutaneous electrical nerve stimulation in unstable angina pectoris. *Coronary Artery Disease* 1997; 8(8-9): 543-50.
49. Borjesson M, Pilhall M, Eliasson T, Norssell H, Mannheimer C, Rolny P. Esophageal visceral pain sensitivity: Effects of TENS and correlation with manometric findings. *Digestive Diseases and Sciences* 1998; 43(8): 1621-8.
50. Borup L, Wurlitzer W, Hedegaard M, Kesmodel US, Hvidman L. Acupuncture as pain relief during delivery: a randomized controlled trial. *Birth* 2009; 36(1): 5-12.
51. Breit R, Van der Wall H. Transcutaneous electrical nerve stimulation for postoperative pain relief after total knee arthroplasty. *The Journal of Arthroplasty* 2004; 19(1): 45-8.
52. Buchmuller A, Navez M, Millette-Bernardin M, et al. Value of TENS for relief of chronic low back pain with or without radicular pain. *European Journal of Pain* 2012; 16(5): 656-65.
53. Bulut M, Özcan A, Çakan T, Mektas M, Çulha C. The Comparison of Effectiveness of TENS and Placebo TENS in Peripheral Neuropathic Pain in Patients with Type II Diabetes Mellitus. *Türkiye Klinikleri Journal of Medical Sciences* 2011; 31(4): 913-8.
54. Bundsen P, Ericson K, Peterson L, Thiringer K. Pain relief in labor by transcutaneous electrical nerve stimulation. Testing of a modified stimulation technique and evaluation of the neurological and biochemical condition of the newborn infant. *Acta Obstetrica et Gynecologica Scandinavica* 1982; 61(2): 129-36.
55. Can F, Tandogan R, Yilmaz I, Dolunay E, Erden Z. Rehabilitation of patellofemoral pain syndrome: TENS versus diadynamic current therapy for pain relief. *Pain Clinic* 2003; 15(1): 61-8.
56. Casale R, Damiani C, Maestri R, Wells CD. Pain and electrophysiological parameters are improved by combined 830-1064 high-intensity LASER in symptomatic carpal tunnel syndrome versus Transcutaneous Electrical Nerve Stimulation. A randomized controlled study. *European Journal of Physical and Rehabilitation Medicine* 2013; 49(2): 205-11.
57. Çebi AT. Effects of transcutaneous electrical nerve stimulation on pain after impacted third molar surgery. *Medicina Oral Patologia Oral y Cirugia Bucal* 2019; 24(3): e404-e8.
58. Celik EC, Erhan B, Gunduz B, Lakse E. The effect of low-frequency TENS in the treatment of neuropathic pain in patients with spinal cord injury. *Spinal cord* 2013; 51(4): 334-7.
59. Cetin N, Aytar A, Atalay A, Akman M. Comparing hot pack, short-wave diathermy, ultrasound, and TENS on isokinetic strength, pain, and functional status of women with osteoarthritic knees: a single-blind, randomized, controlled trial. *American Journal of Physical Medicine and Rehabilitation* 2008; 87(6): 443-51.

## 08\_OL-TABLE1\_IncludedStudies

60. Chandra A, Banavaliker JN, Das PK, Hasti S. Use of transcutaneous electrical nerve stimulation as an adjunctive to epidural analgesia in the management of acute thoracotomy pain. *Indian J Anaesth* 2010; 54(2): 116-20.
61. Cheing GL, Hui-Chan CW. Transcutaneous electrical nerve stimulation: nonparallel antinociceptive effects on chronic clinical pain and acute experimental pain. *Archives of Physical Medicine and Rehabilitation* 1999; 80(3): 305-12.
62. Cheing GL, Luk ML. Transcutaneous electrical nerve stimulation for neuropathic pain. *Journal of Hand Surgery* 2005; 30(1): 50-5.
63. Cheing GL, Hui-Chan CW, Chan KM. Does four weeks of TENS and/or isometric exercise produce cumulative reduction of osteoarthritic knee pain? *Clinical Rehabilitation* 2002; 16(7): 749-60.
64. Cheing GL, Tsui AY, Lo SK, Hui-Chan CW. Optimal stimulation duration of tens in the management of osteoarthritic knee pain. *Journal of Rehabilitation Medicine* 2003; 35(2): 62-8.
65. Chellappa D, Thirupathy M. Comparative efficacy of low-Level laser and TENS in the symptomatic relief of temporomandibular joint disorders: a randomized clinical trial. *Indian Journal of Dental Research* 2020; 31(1): 42-7.
66. Cherian JJ, Harrison PE, Benjamin SA, Bhave A, Harwin SF, Mont MA. Do the Effects of Transcutaneous Electrical Nerve Stimulation on Knee Osteoarthritis Pain and Function Last? *The Journal of Knee Surgery* 2016; 29(6): 497-501.
67. Cherian JJ, Kapadia BH, Bhave A, et al. Use of Transcutaneous Electrical Nerve Stimulation Device in Early Osteoarthritis of the Knee. *The Journal of Knee Surgery* 2015; 28(4): 321-7.
68. Cherian JJ, Kapadia BH, McElroy MJ, et al. Knee Osteoarthritis: Does Transcutaneous Electrical Nerve Stimulation Work? *Orthopedics* 2016; 39(1): e180-6.
69. Chesterton LS, Lewis AM, Sim J, et al. Transcutaneous electrical nerve stimulation as adjunct to primary care management for tennis elbow: pragmatic randomised controlled trial (TATE trial). *BMJ* 2013; 347: f5160.
70. Lewis M, Chesterton LS, Sim J, Mallen CD, Hay EM, van der Windt DA. An Economic Evaluation of TENS in Addition to Usual Primary Care Management for the Treatment of Tennis Elbow: Results from the TATE Randomized Controlled Trial. *PloS one* 2015; 10(8): e0135460.
71. Chia Y, Arulkumaran S, Chua S, Ratnam S. Effectiveness of transcutaneous electric nerve stimulator for pain relief in labour. *Asia Oceania J Obstet Gynaecol* 1990; 16(2): 145-51.
72. Chiou YF, Yeh ML, Wang YJ. Transcutaneous Electrical Nerve Stimulation on Acupuncture Points Improves Myofascial Pain, Moods, and Sleep Quality. *Rehabilitation Nursing* 2020; 45(4): 225-33.
73. Chitsaz A, Janghorbani M, Shaygannejad V, Ashtari F, Heshmatipour M, Freeman J. Sensory complaints of the upper extremities in multiple sclerosis: relative efficacy of nortriptyline and transcutaneous electrical nerve stimulation. *The Clinical Journal of Pain* 2009; 25(4): 281-5.
74. Chiu TT, Hui-Chan CW, Chein G. A randomized clinical trial of TENS and exercise for patients with chronic neck pain. *Clinical Rehabilitation* 2005; 19(8): 850-60.
75. Cipriano G, Jr., de Camargo Carvalho AC, Bernardelli GF, Tayar Peres PA. Short-term transcutaneous electrical nerve stimulation after cardiac surgery: effect on pain, pulmonary function and electrical muscle activity. *Interactive Cardiovascular and Thoracic Surgery* 2008; 7(4): 539-43.
76. Cipriano G, Jr., Neder JA, Umpierre D, et al. Sympathetic ganglion transcutaneous electrical nerve stimulation after coronary artery bypass graft surgery improves femoral blood flow and exercise tolerance. *Journal of Applied Physiology* 2014; 117(6): 633-8.
77. Coelho de Amorim JS, Braz Rossetti Mr, Mendes Braga NIH. Effects of manual therapy and electrotherapy on knee osteoarthritis. *ConScientiae Saude* 2014; 13(1): 11-20.
78. Cooperman AM, Hall B, Mikalacki K, Hardy R, Sardar E. Use of transcutaneous electrical stimulation in the control of postoperative pain. *American Journal of Surgery* 1977; 133(2): 185-7.
79. Coyne PJ, MacMurren M, Izzo T, Kramer T. Transcutaneous electrical nerve stimulator for procedural pain associated with intravenous needlesticks. *Journal of Intravenous Nursing* 1995; 18(5): 263-7.
80. Crompton AC, Johnson N, Dudek U, Batra N, Tucker A. Is transcutaneous electrical nerve stimulation of any value during cervical laser treatment? *British Journal of Obstetrics and Gynaecology* 1992; 99(6): 492-4.
81. Cuschieri RJ, Morran CG, McArdle CS. Transcutaneous electrical stimulation for postoperative pain. *Annals of the Royal College of Surgeons of England* 1985; 67(2): 127-9.
82. Cuschieri RJ, Morran CG, Pollock JG. Transcutaneous electrical stimulation for ischaemic pain at rest. *British Medical Journal* 1987; 295(6593): 306.
83. da Silva TFG, Suda EY, Marçulo CA, Paes FHS, Pinheiro GT. Comparison of transcutaneous electrical nerve stimulation and hydrotherapy effects on pain, flexibility and quality of life in patients with fibromyalgia. *Fisioterapia e Pesquisa* 2008; 15(2): 118-24 7p.

## 08\_OL-TABLE1\_IncludedStudies

84. da Silva MP, Liebano RE, Rodrigues VA, Abla LE, Ferreira LM. Transcutaneous electrical nerve stimulation for pain relief after liposuction: a randomized controlled trial. *Aesthetic plastic surgery* 2015; 39(2): 262-9.
85. Dailey DL, Rakel BA, Vance CG, et al. Transcutaneous electrical nerve stimulation reduces pain, fatigue and hyperalgesia while restoring central inhibition in primary fibromyalgia. *Pain* 2013; 154(11): 2554-62.
86. Dailey DL, Vance CGT, Rakel BA, et al. Transcutaneous Electrical Nerve Stimulation Reduces Movement-Evoked Pain and Fatigue: A Randomized, Controlled Trial. *Arthritis & Rheumatology* 2020; 72(5): 824-36.
87. Davies JR. Ineffective transcutaneous nerve stimulation following epidural anaesthesia. *Anaesthesia* 1982 Apr;37(4):453-457 1982.
88. Dawood MY, Ramos J. Transcutaneous electrical nerve stimulation (TENS) for the treatment of primary dysmenorrhea: a randomized crossover comparison with placebo TENS and ibuprofen. *Obstetrics and gynecology* 1990; 75(4): 656-60.
89. De Angelis C, Perrone G, Santoro G, Nofroni I, Zichella L. Suppression of pelvic pain during hysteroscopy with a transcutaneous electrical nerve stimulation device. *Fertility and sterility* 2003; 79(6): 1422-7.
90. De Giorgi I, Castroflorio T, Sartoris B, Deregibus A. The use of conventional transcutaneous electrical nerve stimulation in chronic facial myalgia patients. *Clinical oral investigations* 2017; 21(1): 275-80.
91. de Oliveira RGCQ, Silva, J.C., de Almeida, J.F., de Araajo, R.C., Pitangui, A.C.R. High and low frequency TENS for primary dysmenorrhea: preliminary study. *ConScientiae Saude* 2012; 11(1): 149-58.
92. de Orange FA, Amorim MMRd, Lima L. Uso da eletroestimulação transcutânea para alívio da dor durante o trabalho de parto em uma maternidade-escola: ensaio clínico controlado %J Revista Brasileira de Ginecologia e Obstetrícia. 2003; 25: 45-52.
93. de Sousa L, Gomes-Sponholz FA, Nakano AM. Transcutaneous electrical nerve stimulation for the relief of post-partum uterine contraction pain during breast-feeding: a randomized clinical trial. *The journal of obstetrics and gynaecology research* 2014; 40(5): 1317-23.
94. DeSantana JM, Santana-Filho VJ, Guerra DR, Sluka KA, Gurgel RQ, da Silva Jr WM. Hypoalgesic Effect of the Transcutaneous Electrical Nerve Stimulation Following Inguinal Herniorrhaphy: A Randomized, Controlled Trial. *Journal of Pain* 2008; 9(7): 623-9.
95. DeSantana J, Sluka K, Rocha LG. High and low frequency TENS reduce postoperative pain intensity after laparoscopic tubal ligation: A randomized controlled trial. *Clinical Journal of Pain* 2009; 25(2): 12-28.
96. Dewan A, Sharma R. Effectiveness of transcutaneous electrical nerve stimulation and interferential electrotherapy in adhesive capsulitis. *Pb Journal of Orthopaedics* 2011; 21(1): 64.
97. Deyo RA, Walsh NE, Martin DC, Schoenfeld LS, Ramamurthy S. A controlled trial of transcutaneous electrical nerve stimulation (TENS) and exercise for chronic low back pain. *The New England journal of medicine* 1990; 322(23): 1627-34.
98. Dibenedetto P, Iona LG, Zidarich V. CLINICAL-EVALUATION OF S-ADENOSYL-L-METHIONINE VERSUS TRANSCUTANEOUS ELECTRICAL NERVE-STIMULATION IN PRIMARY FIBROMYALGIA. *Current Therapeutic Research-Clinical and Experimental* 1993; 53(2): 222-9.
99. Dilekci E, Alpayci M, Bayram KB, et al. The efficacy of TENS in patients with lateral epicondylitis: A randomized controlled study. [Turkish]. *Turkiye Fiziksel Tip ve Rehabilitasyon Dergisi* 2016; 62(4): 297-302.
100. Dissanayaka TD, Pallegama RW, Suraweera HJ, Johnson MI, Kariyawasam AP. Comparison of the Effectiveness of Transcutaneous Electrical Nerve Stimulation and Interferential Therapy on the Upper Trapezius in Myofascial Pain Syndrome: A Randomized Controlled Study. *American journal of physical medicine & rehabilitation* 2016; 95(9): 663-72.
101. Dogu B, Yilmaz F, Karan A, Ergoz E, Kuran B. Comparative the effectiveness of occlusal splint and TENS treatments on clinical findings and pain threshold of temporomandibular disorders secondary to bruxism. [Turkish]. *Turkiye Fiziksel Tip ve Rehabilitasyon Dergisi* 2008; 54(4): 1-7.
102. Domaille M, Reeves B. TENS and pain control after coronary artery bypass surgery. *Physiotherapy* 1997; 83(10): 510-6.
103. Ebadi S, Ansari N, Ahadi T, Fallah E, Forogh B. No immediate analgesic effect of diadynamic current in patients with nonspecific low back pain in comparison to TENS. *Journal of Bodywork and Movement Therapies* 2018; 22(3): 693-9.
104. Ekblom A, Hansson P. Thermal sensitivity is not changed by acute pain or afferent stimulation. *Journal of neurology, neurosurgery, and psychiatry* 1987; 50(9): 1216-20.
105. Ekim A, Armagan O, Oner C. [Efficiency of TENS treatment in hemiplegic shoulder pain: a placebo controlled study]. *Agri : Agri (Algoloji) Derneği'nin Yayın organidir = The journal of the Turkish Society of Algology* 2008; 20(1): 41-6.
106. Elboim-Gabyzon M, Andrawus Najjar S, Shtarker H. Effects of transcutaneous electrical nerve stimulation (TENS) on acute postoperative pain intensity and mobility after hip fracture: a double-blinded, randomized trial. *Clinical interventions in aging* 2019; 14: 1841-50.

## 08\_OL-TABLE1\_IncludedStudies

107. Elserty N, Kattabei O, Elhafez H. Effect of Fixed Versus Adjusted Transcutaneous Electrical Nerve Stimulation Amplitude on Chronic Mechanical Low Back Pain. *Journal of alternative and complementary medicine (New York, NY)* 2016; 22(7): 557-62.
108. Emmiler M, Solak O, Kocogullari C, et al. Control of acute postoperative pain by transcutaneous electrical nerve stimulation after open cardiac operations: a randomized placebo-controlled prospective study. *The heart surgery forum* 2008; 11(5): E300-3.
109. Engen DJ, Carns PE, Allen MS, et al. Evaluating efficacy and feasibility of transcutaneous electrical nerve stimulation for postoperative pain after video-assisted thoracoscopic surgery: A randomized pilot trial. *Complementary therapies in clinical practice* 2016; 23: 141-8.
110. Erden S, Senol Celik S. The effect of transcutaneous electrical nerve stimulation on post-thoracotomy pain. *Contemporary nurse* 2015; 51(2-3): 163-70.
111. Erdogan M, Erdogan A, Erbil N, Karakaya H, Demircan A. Prospective, randomized, placebo-controlled study of the effect of TENS on postthoracotomy pain and pulmonary function. *World journal of surgery* 2005; 29(12): 1563-70.
112. Erkkola R, Pikkola P, Kanto J. Transcutaneous nerve stimulation for pain relief during labour: a controlled study. *Annales chirurgiae ET gynaecologiae* 1980; 69(6): 273-7.
113. Escortell-Mayor E, Riesgo-Fuertes R, Garrido-Elustondo S, et al. Primary care randomized clinical trial: manual therapy effectiveness in comparison with TENS in patients with neck pain. *Manual therapy* 2011; 16(1): 66-73.
114. Escortell Mayor E, Lebrijo Perez G, Perez Martin Y, Asunsolo del Barco A, Riesgo Fuertes R, Saa Requejo C. [Randomized clinical trial for primary care patients with neck pain: manual therapy versus electrical stimulation]. *Atencion primaria* 2008; 40(7): 337-43.
115. Esteban Gonzalez P, Novoa NM, Varela G. Transcutaneous Electrical Nerve Stimulation Reduces Post-Thoractomy Ipsilateral Shoulder Pain. A Prospective Randomized Study. *Archivos de bronconeumologia* 2015; 51(12): 621-6.
116. Eyigor S, Karapolat H, Ibisoglu U, Durmaz B. Does transcutaneous electrical nerve stimulation or therapeutic ultrasound increase the effectiveness of exercise for knee osteoarthritis: A randomized controlled study. [Turkish]. *Agri : Agri (Algoloji) Derneği'nin Yayin organidir = The journal of the Turkish Society of Algology* 2008; 20(1): 32-40.
117. Eyigor C, Eyigor S, Kivilcim Korkmaz O. Are intra-articular corticosteroid injections better than conventional TENS in treatment of rotator cuff tendinitis in the short run? A randomized study. *European journal of physical and rehabilitation medicine* 2010; 46(3): 315-24.
118. Facci LM, Nowotny JP, Tormem F, Trevisani VF. Effects of transcutaneous electrical nerve stimulation (TENS) and interferential currents (IFC) in patients with nonspecific chronic low back pain: randomized clinical trial. *Sao Paulo medical journal = Revista paulista de medicina* 2011; 129(4): 206-16.
119. Farahani DM, Tavallae SA, Ahmadi K, Ashtiani AF. Comparison of Neurofeedback and Transcutaneous Electrical Nerve Stimulation Efficacy on Treatment of Primary Headaches: A Randomized Controlled Clinical Trial. *Iranian Red Crescent Medical Journal* 2014; 16(8).
120. Farina S, Casarotto M, Benelle M, et al. A randomized controlled study on the effect of two different treatments (FREMS AND TENS) in myofascial pain syndrome. *Europa medicophysica* 2004; 40(4): 293-301.
121. Fatima N, Sarfraz N. Comparison of High Versus Low Transcutaneous Electrical Nerve Stimulation for Pain Management After Caesarean Section: A Clinical Trial. *Annals of King Edward Medical University Lahore Pakistan* 2019; 25(2).
122. Ferraz FS, Moreira CMC. Eletroanalgesia com utilizacao da TENS no pos-operatorio de cirurgia cardiaca (Electroanalgesia with TENS in postoperative of cardiac surgery) [Portuguese]. *Fisioterapia em Movimento [Physical Therapy in Movement]* 2009 Jan-Mar;22(1):133-139 2009.
123. Ferreira FC, Issy AM, Sakata RK. Assessing the effects of transcutaneous electrical nerve stimulation (TENS) in post-thoracotomy analgesia. *Revista brasileira de anestesiologia* 2011; 61(5): 561-7, 308-10.
124. Ferreira AP, Costa DR, Oliveira AI, et al. Short-term transcutaneous electrical nerve stimulation reduces pain and improves the masticatory muscle activity in temporomandibular disorder patients: a randomized controlled trial. *Journal of applied oral science : revista FOB* 2017; 25(2): 112-20.
125. Finsen V, Persen L, Lovlien M, et al. Transcutaneous electrical nerve stimulation after major amputation. *The Journal of bone and joint surgery British volume* 1988; 70(1): 109-12.
126. Fiorelli A, Morgillo F, Milione R, et al. Control of post-thoracotomy pain by transcutaneous electrical nerve stimulation: effect on serum cytokine levels, visual analogue scale, pulmonary function and medication. *European journal of cardio-thoracic surgery : official journal of the European Association for Cardio-thoracic Surgery* 2012; 41(4): 861-8; discussion 8.
127. Fodor-Sertl B, Miller K, Hohenfellner B. (Transcutaneous electric nerve block in postoperative pain-therapy) [German]. *Zeitschrift fuer Physikalische Medizin, Balneologie, Medizinische Klimatologie* 1990; 19: 132-7.
128. Forogh B, Aslanpour H, Fallah E, Babaei-Ghazani A, Ebadi S. Adding high-frequency transcutaneous electrical nerve stimulation to the first phase of post anterior cruciate ligament reconstruction rehabilitation does not improve pain and function in young male athletes more than exercise alone: a randomized single-blind clinical trial. *Disability and rehabilitation* 2019; 41(5): 514-22.



## 08\_OL-TABLE1\_IncludedStudies

129. Forst T, Nguyen M, Forst S, Disselhoff B, Pohlmann T, Pfutzner A. Impact of low frequency transcutaneous electrical nerve stimulation on symptomatic diabetic neuropathy using the new Salutaris (R) device. *Diabetes Nutrition & Metabolism* 2004; 17(3): 163-8.
130. Forster EL, Kramer JF, Lucy SD, Scudds RA, Novick RJ. Effect of TENS on pain, medications, and pulmonary function following coronary artery bypass graft surgery. *Chest* 1994; 106(5): 1343-8.
131. Fujii-Abe K, Umino M, Kawahara H, Terada C, Satomura K, Fukayama H. New method for postoperative pain relief using a combination of noxious and non-noxious stimuli after impacted wisdom tooth extraction. *Journal of oral science* 2019; 61(2): 364-9.
132. Galli TT, Chiavegato LD, Liebano RE. Effects of TENS in living kidney donors submitted to open nephrectomy: a randomized placebo-controlled trial. *European journal of pain (London, England)* 2015; 19(1): 67-76.
133. Galloway DJ, Boyle P, Burns HJ, Davidson PM, George WD. A clinical assessment of electroanalgesia following abdominal operations. *Surgery, gynecology & obstetrics* 1984; 159(5): 453-6.
134. Garcia-Perez S, Garcia-Rios MC, Perez-Marmol JM, et al. Effectiveness of Transcutaneous Electrical Nerve Stimulation Energy in Older Adults: A Pilot Clinical Trial. *Advances in skin & wound care* 2018; 31(10): 462-9.
135. Gerson GR, Jones RB, Luscombe DK. Studies on the concomitant use of carbamazepine and clomipramine for the relief of post-herpetic neuralgia. *Postgraduate medical journal* 1977; 53 Suppl 4: 104-9.
136. Ghoname ESA, Craig WF, White PF, et al. Percutaneous electrical nerve stimulation for low back pain - A randomized crossover study. *Jama-Journal of the American Medical Association* 1999; 281(9): 818-23.
137. Ghoname ESA, White PF, Ahmed HE, Hamza MA, Craig WF, Noe CE. Percutaneous electrical nerve stimulation: an alternative to TENS in the management of sciatica. *Pain* 1999; 83(2): 193-9.
138. Gilbert JM, Gledhill T, Law N, George C. Controlled trial of transcutaneous electrical nerve stimulation (TENS) for postoperative pain relief following inguinal herniorrhaphy. *The British journal of surgery* 1986; 73(9): 749-51.
139. Grabińska E, Leśniewicz J, Pieszyński I, Kostka J. Comparison of the analgesic effect of interferential current (IFC) and TENS in patients with low back pain. *Wiadomosci lekarskie (Warsaw, Poland)* 2015; 68(1): 13-9.
140. Graff-Radford S, Reeves J, Baker R, Chiu D. Effects of transcutaneous electrical nerve stimulation on myofascial pain and trigger point sensitivity. *Pain* 1989; 37(1): 1-5.
141. Grant DJ, Bishop\_Miller J, Winchester DM, Anderson M, Faulkner S. A randomized comparative trial of acupuncture versus transcutaneous electrical nerve stimulation for chronic back pain in the elderly. *Pain* 1999; 82(1): 9-13.
142. Gregorini C, Cipriano Jr G, De Aquino LM, Rodrigues Branco JN, Bernardelli GF. Short-duration transcutaneous electrical nerve stimulation in the postoperative period of cardiac surgery. [Portuguese, English]. *Arquivos brasileiros de cardiologia* 2010; 94(3): 325-31+45-51.
143. Grimmer K. A controlled double blind study comparing the effects of strong burst mode TENS and High Rate TENS on painful osteoarthritic knees. *Australian Journal of Physiotherapy* 1992; 38: 49-56.
144. Gschiel B, Kager H, Pipam W, Weichart K, Likar R. Analgesic efficacy of TENS therapy in patients with gonarthrosis. A prospective, randomised, placebo-controlled, double-blind study. [German]. *Schmerz (Berlin, Germany)* 2010; 24(5): 494-500.
145. Gunay Ucurum S, Kaya DO, Kayali Y, Askin A, Tekindal MA. Comparison of different electrotherapy methods and exercise therapy in shoulder impingement syndrome: a prospective randomized controlled trial. *Acta orthopaedica et traumatologica turcica* 2018; 52(4): 249-55.
146. Guo XJ, Jia J. Comparison of therapeutic effects on fibromyalgia syndrome between dermal-neurological electric stimulation and electric acupuncture. *Chinese Journal of Clinical Rehabilitation* 2005; 9(46): 171-3.
147. Hamza MA, White PF, Ahmed HE, Ghoname EA. Effect of the frequency of transcutaneous electrical nerve stimulation on the postoperative opioid analgesic requirement and recovery profile. *Anesthesiology* 1999; 91(5): 1232-8.
148. Hanfy HM, El-Bigawy A. Effects of transcutaneous electrical nerve stimulation versus acupressure in the treatment of primary dysmenorrhea. *Bull Fac Phys Ther Cairo Univ* 2004; 9: 2.
149. Hansson P, Eklom A. Transcutaneous electrical nerve stimulation (TENS) as compared to placebo TENS for the relief of acute oro-facial pain. *Pain* 1983; 15(2): 157-65.
150. Hansson P, Eklom A, Thomsson M, Fjellner B. Influence of naloxone on relief of acute oro-facial pain by transcutaneous electrical nerve stimulation (TENS) or vibration. *Pain* 1986; 24(3): 323-9.

## 08\_OL-TABLE1\_IncludedStudies

151. Hargreaves A, Lander J. Use of transcutaneous electrical nerve stimulation for postoperative pain. *Nursing research* 1989; 38(3): 159-61.
152. Harrison RF, Woods T, Shore M, Mathews G, Unwin A. Pain relief in labour using transcutaneous electrical nerve stimulation (TENS). A TENS/TENS placebo controlled study in two parity groups. *British journal of obstetrics and gynaecology* 1986; 93(7): 739-46.
153. Hart JM, Kuenze CM, Pietrosimone BG, Ingersoll CD. Quadriceps function in anterior cruciate ligament-deficient knees exercising with transcutaneous electrical nerve stimulation and cryotherapy: a randomized controlled study. *Clinical rehabilitation* 2012; 26(11): 974-81.
154. Hazneci B, Tan AK, Ozdem T, Dincer K, Kalyon TA. The effects of transcutaneous electroneurostimulation and ultrasound in the treatment of reflex sympathetic dystrophy syndrome. [Turkish]. *Turkiye Fiziksel Tip ve Rehabilitasyon Dergisi* 2005; 51(3): 83-9.
155. Herrera-Lasso I, Mobarak L, Fernández-Dominguez L, Cardiel MH, Alarcón-Segovia D. Comparative Effectiveness of Packages of Treatment Including Ultrasound or Transcutaneous Electrical Nerve Stimulation in Painful Shoulder Syndrome. *Physiotherapy* 1993; 79(4): 251-3.
156. Hershman M CW, Swift R, Reilly D, Gompertz H, Wood C. Transcutaneous electrical nerve stimulation as adjunctive analgesia in patients undergoing abdominal procedures. *Surg Res Commun* 1989; 7: 65-9.
157. Hokenek NM, Erdogan MO, Hokenek UD, Algin A, Tekyol D, Seyhan AU. Treatment of migraine attacks by transcutaneous electrical nerve stimulation in emergency department: A randomize controlled trial. *American Journal of Emergency Medicine* 2020.
158. Hou CR, Tsai LC, Cheng KF, Chung KC, Hong C. Immediate effects of various physical therapeutic modalities on cervical myofascial pain and trigger-point sensitivity. *Archives of physical medicine and rehabilitation* 2002; 83(10): 1406-14.
159. Hruby G, Ames C, Chen C, et al. Assessment of efficacy of transcutaneous electrical nerve stimulation for pain management during office-based flexible cystoscopy. *Urology* 2006; 67(5): 914-7.
160. Hsieh RL, Lee WC. One-shot percutaneous electrical nerve stimulation vs. transcutaneous electrical nerve stimulation for low back pain: comparison of therapeutic effects. *American journal of physical medicine & rehabilitation* 2002; 81(11): 838-43.
161. Hsueh TC, Cheng PT, Kuan TS, Hong CZ. The immediate effectiveness of electrical nerve stimulation and electrical muscle stimulation on myofascial trigger points. *American journal of physical medicine & rehabilitation* 1997; 76(6): 471-6.
162. Hughes S, Dailey P, Partridge C. Transcutaneous electrical nerve stimulation for labour analgesia. *Anesthesia and analgesia* 1988; 67: S99.
163. Husch HH, Watte G, Zanon M, et al. Effects of Transcutaneous Electrical Nerve Stimulation on Pain, Pulmonary Function, and Respiratory Muscle Strength After Posterolateral Thoracotomy: A Randomized Controlled Trial. *Lung* 2020; 198(2): 345-53.
164. Ilhanli I. Conventional, Acupuncture-Like or Brief-Intense: Is There Any Difference Between TENS Modalities According to Outcomes of Chronic Low Back Pain with Lumbar Disc Herniation. *Clinical Medicine Research* 2015; 4(5): 143-50.
165. Inal EE, Eroglu P, Yucel SH, Orhan H. Which is the Appropriate Frequency of TENS in Managing Knee Osteoarthritis: High or Low Frequency? *Journal of Clinical and Analytical Medicine* 2016; 7(3): 339-44.
166. Isik M, Ugur M, Yakisan RS, Sari T, Yilmaz N. Comparison of the effectiveness of medicinal leech and TENS therapy in the treatment of primary osteoarthritis of the knee : A randomized controlled trial. *Zeitschrift fur Rheumatologie* 2017; 76(9): 798-805.
167. Jaafarpour M, Khani A, Javadifar N, Taghinejad H, Mahmoudi R, Saadipour KH. The analgesic effect of transcutaneous electrical nerve stimulation (TENS) on caesarean under spinal anaesthesia. *Journal of Clinical and Diagnostic Research* 2008; 2(3): 815-9.
168. Jamison RN, Wan L, Edwards RR, Mei A, Ross EL. Outcome of a High-Frequency Transcutaneous Electrical Nerve Stimulator (hfTENS) Device for Low Back Pain: A Randomized Controlled Trial. *Pain Practice* 2019; 19(5): 466-75.
169. Jarzem P, Harvey E, Arcaro N, Kaczorowski J. Transcutaneous electrical nerve stimulation (TENS) for short-term treatment of low back pain - randomized double blind crossover study of sham versus conventional TENS. *Journal of Musculoskeletal Pain* 2005; 13(2): 11-7.
170. Jensen JE, Conn RR, Hazelrigg G, Hewett JE. The use of transcutaneous neural stimulation and isokinetic testing in arthroscopic knee surgery. *American journal of sports medicine* 1985; 13(1): 27-33.
171. Jensen H, Zesler R, Christensen T. Transcutaneous electrical nerve stimulation (TNS) for painful osteoarthritis of the knee. *International journal of rehabilitation research Internationale Zeitschrift fur Rehabilitationsforschung Revue internationale de recherches de readaptation* 1991; 14(4): 356-8.
172. Jones AYM, Hutchinson RC. A comparison of the analgesic effect of transcutaneous electrical nerve stimulation and entonox. *Physiotherapy* 1991; 77(8): 526-30.

## 08\_OL-TABLE1\_IncludedStudies

173. Kara B, Baskurt F, Acar S, et al. The effect of TENS on pain, function, depression, and analgesic consumption in the early postoperative period with spinal surgery patients. *Turkish neurosurgery* 2011; 21(4): 618-24.
174. Karamaz A, Kaya S, Karaman H, Turhanoglu S. Effect of the frequency of transcutaneous electrical nerve stimulation on analgesia during extracorporeal shock wave lithotripsy. *Urological research* 2004; 32(6): 411-5.
175. Kayman-Kose S, Arioz DT, Toktas H, et al. Transcutaneous electrical nerve stimulation (TENS) for pain control after vaginal delivery and cesarean section. *The journal of maternal-fetal & neonatal medicine : the official journal of the European Association of Perinatal Medicine, the Federation of Asia and Oceania Perinatal Societies, the International Society of Perinatal Obstet* 2014; 27(15): 1572-5.
176. Keskin EA, Onur O, Keskin HL, Gumus, II, Kafali H, Turhan N. Transcutaneous electrical nerve stimulation improves low back pain during pregnancy. *Gynecologic and obstetric investigation* 2012; 74(1): 76-83.
177. Kibar S, Konak HE, V SA, Doğanay ErdoğAn B, EvciK D. The Effectiveness of Combined Transcutaneous Electrical Nerve Stimulation and Interferential Current Therapy on Chronic Low Back Pain: A Randomized, Double-Blind, Sham-Controlled Study. *Journal of Physical Medicine & Rehabilitation Sciences / Fiziksel Tup ve Rehabilitasyon Bilimleri Dergisi* 2020; 23(1): 32-40.
178. Kim S, Park K, Son B, Jeon Y. The Effect of Transcutaneous Electrical Nerve Stimulation on Pain During Venous Cannulation. *Current Therapeutic Research* 2012; 73(4/5): 134-9.
179. Kim D-H, Yoon KB, Yoon DM, et al. Comparison of NSAID Patch Given as Monotherapy and NSAID Patch in Combination with Transcutaneous Electric Nerve Stimulation, a Heating Pad, or Topical Capsaicin in the Treatment of Patients with Myofascial Pain Syndrome of the Upper Trapezius: A Pilot Study. *Pain Medicine* 2014; 15(12): 2128-38.
180. Kirupa K, Divya Mary SM, Vaishnavi G, Nithya Nisha R, Rennie Mercy J, Jaiganesh G. A comparative study of ultrasound therapy and transcutaneous electrical nerve stimulation in reducing pain for temporomandibular joint disorder. *Drug invention today* 2019; 12(3): 515-7.
181. Knobel R, Radünz V, Carraro TEJT, Contexto-Enfermagem. Use of transcutaneous electric nerve stimulation for pain relief in labour: a possible way to care the child-bearer. 2005; 14(2): 229-36.
182. Koca I, Boyaci A, Tutoglu A, Ucar M, Kocaturk O. Assessment of the effectiveness of interferential current therapy and TENS in the management of carpal tunnel syndrome: a randomized controlled study. *Rheumatology international* 2014; 34(12): 1639-45.
183. Kofotolis ND, Vlachopoulos SP, Kellis E. Sequentially allocated clinical trial of rhythmic stabilization exercises and TENS in women with chronic low back pain. *Clinical rehabilitation* 2008; 22(2): 99-111.
184. Koke AJ, Schouten JS, Lamerichs-Geelen MJ, et al. Pain reducing effect of three types of transcutaneous electrical nerve stimulation in patients with chronic pain: a randomized crossover trial. *Pain* 2004; 108(1-2): 36-42.
185. Korkmaz OK, Capaci K, Eyigor C, Eyigor S. Pulsed radiofrequency versus conventional transcutaneous electrical nerve stimulation in painful shoulder: a prospective, randomized study. *Clinical rehabilitation* 2010; 24(11): 1000-8.
186. Kumar S, Raje A. Effect of progressive muscular relaxation exercises versus transcutaneous electrical nerve stimulation on tension headache: A comparative study. *Hong Kong Physiotherapy Journal* 2014; 32(2): 86-91.
187. Labrecque M, Nouwen A, Bergeron M, Rancourt JF. A randomized controlled trial of nonpharmacologic approaches for relief of low back pain during labor. *The Journal of family practice* 1999; 48(4): 259-63.
188. Laitinen J, Nuutinen L. Failure of transcutaneous electrical nerve stimulation and indomethacin to reduce opiate requirement following cholecystectomy. *Acta anaesthesiologica Scandinavica* 1991; 35(8): 700-5.
189. Lang T, Barker R, Steinlechner B, et al. TENS relieves acute posttraumatic hip pain during emergency transport. *The Journal of trauma* 2007; 62(1): 184-8; discussion 8.
190. Langley GB, Sheppard H, Johnson M, Wigley RD. The analgesic effects of transcutaneous electrical nerve stimulation and placebo in chronic pain patients. A double-blind non-crossover comparison. *Rheumatology international* 1984; 4(3): 119-23.
191. Lauretti GR, Chubaci EF, Mattos AL. Efficacy of the use of two simultaneously TENS devices for fibromyalgia pain. *Rheumatology international* 2013; 33(8): 2117-22.
192. Lauretti GR, Oliveira R, Parada F, Mattos AL. The New Portable Transcutaneous Electrical Nerve Stimulation Device Was Efficacious in the Control of Primary Dysmenorrhea Cramp Pain. *Neuromodulation : journal of the International Neuromodulation Society* 2015; 18(6): 522-6; discussion -7.
193. Law PP, Cheing GL. Optimal stimulation frequency of transcutaneous electrical nerve stimulation on people with knee osteoarthritis. *Journal of rehabilitation medicine* 2004; 36(5): 220-5.



## 08\_OL-TABLE1\_IncludedStudies

194. Law PPW, Cheing GLY, Tsui AYY. Does transcutaneous electrical nerve stimulation improve the physical performance of people with knee osteoarthritis? *Journal of Clinical Rheumatology* 2004; 10(6): 295-9.
195. Leandri M, Parodi CI, Corrieri N, Rigardo S. Comparison of TENS treatments in hemiplegic shoulder pain. *Scandinavian journal of rehabilitation medicine* 1990; 22(2): 69-71.
196. Lee E, Chung I, Lee J, Lam P, Chin R. The role of transcutaneous electrical nerve stimulation in management of labour in obstetric patients. *Asia Oceania J Obstet Gynaecol* 1990; 16(3): 247-54.
197. Lee CH, Lee TY, Her JS, Liao WL, Hsieh CL. Single-Blinded, Randomized Preliminary Study Evaluating the Effect of Transcutaneous Electrical Nerve Stimulation on Postoperative Pain in Patients with Colles' Fracture. *Journal of alternative and complementary medicine (New York, NY)* 2015; 21(12): 754-8.
198. Lee JE, Anderson CM, Perkhounkova Y, Sleenwenhoek BM, Louison RR. Transcutaneous Electrical Nerve Stimulation Reduces Resting Pain in Head and Neck Cancer Patients A Randomized and Placebo-Controlled Double-Blind Pilot Study. *Cancer Nursing* 2019; 42(3): 218-28.
199. Leo KC, Dostal WF, Bossen DG, Eldridge VL, Fairchild ML, Evans RE. Effect of transcutaneous electrical nerve stimulation characteristics on clinical pain. *Physical therapy* 1986; 66(2): 200-5.
200. Leonard G, Cloutier C, Marchand S. Reduced analgesic effect of acupuncture-like TENS but not conventional TENS in opioid-treated patients. *The journal of pain : official journal of the American Pain Society* 2011; 12(2): 213-21.
201. Lewers D, Clelland J, Jackson J, Varner R, Bergman J. Transcutaneous electrical nerve stimulation in the relief of primary dysmenorrhea. *Physical therapy* 1989; 69(1): 3-9.
202. Lewis D, Lewis B, Sturrock R. Transcutaneous electrical nerve stimulation in osteoarthritis: a therapeutic alternative? *Annals of the rheumatic diseases* 1984; 43(1): 47-9.
203. Lewis B, Lewis D, Cumming G. The comparative analgesic efficacy of transcutaneous electrical nerve stimulation and a non-steroidal anti-inflammatory drug for painful osteoarthritis. *British journal of rheumatology* 1994; 33(5): 455-60.
204. Likar R, Molnar M, Pipam W, et al. Postoperative transcutaneous electrical nerve stimulation (TENS) in shoulder surgery (randomized, double blind, placebo controlled pilot trial). [German]. *Schmerz (Berlin, Germany)* 2001; 15(3): 158-63.
205. Lim AT, Edis G, Kranz H, Mendelson G, Selwood T, Scott DF. Postoperative pain control: contribution of psychological factors and transcutaneous electrical stimulation. *Pain* 1983; 17(2): 179-88.
206. Lima PMB, Farias RTFB, Carvalho ACA, da Silva PNC, Filho NAF, de Brito RF. Transcutaneous electrical nerve stimulation after coronary artery bypass graft surgery. *Brazilian Journal of Cardiovascular Surgery* 2011; 26(4): 591-6.
207. Limoges MF, Rickabaugh B. Evaluation of TENS during screening flexible sigmoidoscopy. *Gastroenterology nursing : the official journal of the Society of Gastroenterology Nurses and Associates* 2004; 27(2): 61-8.
208. Lin ML, Luo YJ, Hsu YM, et al. Randomized controlled trial Comparing of Analgesic Effectiveness of TPRF and TENS in Clinical and Endocrinological Changes for Chronic Shoulder Pain; 2015.
209. Lin M-L, Chiu H-W, Shih Z-M, et al. Two Transcutaneous Stimulation Techniques in Shoulder Pain: Transcutaneous Pulsed Radiofrequency (TPRF) versus Transcutaneous Electrical Nerve Stimulation (TENS): A Comparative Pilot Study. *Pain research & management* 2019; 2019: 2823401.
210. Linde C, Isacson G, Jonsson BG. Outcome of 6-week treatment with transcutaneous electric nerve stimulation compared with splint on symptomatic temporomandibular joint disk displacement without reduction. *Acta odontologica scandinavica* 1995; 53(2): 92-8.
211. Linn SL, Granat MH, Lees KR. Prevention of shoulder subluxation after stroke with electrical stimulation. *Stroke* 1999; 30(5): 963-8.
212. Lison JF, Amer-Cuenca JJ, Piquer-Marti S, Benavent-Caballer V, Bivia-Roig G, Marin-Buck A. Transcutaneous Nerve Stimulation for Pain Relief During Office Hysteroscopy: A Randomized Controlled Trial. *Obstetrics and gynecology* 2017; 129(2): 363-70.
213. Liu YC, Liao WS, Lien IN. Effect of transcutaneous electrical nerve stimulation for post-thoracotomy pain. *Taiwan I Hsueh Hui Tsa Chih* 1985; 84(7): 801-9.
214. Liu Y, Dong Z, Wang R, et al. Migraine Prevention Using Different Frequencies of Transcutaneous Occipital Nerve Stimulation: A Randomized Controlled Trial. *The journal of pain : official journal of the American Pain Society* 2017; 18(8): 1006-15.
215. Lofgren M, Norrbrink C. Pain relief in women with fibromyalgia: a cross-over study of superficial warmth stimulation and transcutaneous electrical nerve stimulation. *Journal of rehabilitation medicine* 2009; 41(7): 557-62.
216. Luchesa CA, Greca FH, Guarita-Souza LC, Luiz Verde dos Santos J, Aquim EE. The role of electroanalgesia in patients undergoing coronary artery bypass surgery. [Portuguese]. *Brazilian Journal of Cardiovascular Surgery* 2009; 24(3): 391-6.

## 08\_OL-TABLE1\_IncludedStudies

217. Lundeberg T. A comparative study of the pain alleviating effect of vibratory stimulation, transcutaneous electrical nerve stimulation, electroacupuncture and placebo. *The American journal of Chinese medicine* 1984; 12(1-4): 72-9.
218. Lundeberg T, Bondesson L, Lundstrom V. Relief of primary dysmenorrhea by transcutaneous electrical nerve stimulation. *Acta obstetrica et gynecologica Scandinavica* 1985; 64(6): 491-7.
219. Machado AFP, Perracini MR, Rampazo ÉP, Driusso P, Liebano RE. Effects of thermotherapy and transcutaneous electrical nerve stimulation on patients with primary dysmenorrhea: A randomized, placebo-controlled, double-blind clinical trial. *Complementary therapies in medicine* 2019; 47: N.PAG.
220. Machin D, Lewith GT, Wylson S. Pain measurement in randomized clinical trials. A comparison of two pain scales. *Clinical Journal of Pain* 1988; 4(3): 161-8.
221. Mahure SA, Rokito AS, Kwon YW. Transcutaneous electrical nerve stimulation for postoperative pain relief after arthroscopic rotator cuff repair: a prospective double-blinded randomized trial. *Journal of shoulder and elbow surgery* 2017; 26(9): 1508-13.
222. Manigandan JB, Ganesh GS, Pattnaik M, Mohanty P. Effect of electrical stimulation to long head of biceps in reducing gleno humeral subluxation after stroke. *NeuroRehabilitation* 2014; 34(2): 245-52.
223. Mannheimer C, Carlsson C. The analgesic effect of transcutaneous electrical nerve stimulation (TENS) in patients with rheumatoid arthritis. A comparative study of different pulse patterns. *Pain* 1979; 6(3): 329-34.
224. Mannheimer J, Whalen E. The efficacy of transcutaneous electric nerve stimulation in dysmenorrhea. *Clinical Journal of Pain* 1985; 1: 75-83.
225. Mannheimer C, Lund S, Carlsson CA. The effect of transcutaneous electrical nerve stimulation (TENS) on joint pain in patients with rheumatoid arthritis. *Scandinavian journal of rheumatology* 1978; 7(1): 13-6.
226. Mannheimer C, Carlsson C, Emanuelsson H, Vedin A, Waagstein F, Wilhelmsson C. The effects of transcutaneous electrical nerve stimulation in patients with severe angina pectoris. *Circulation* 1985; 71(2): 308-16.
227. Mansourian A, Poursahidi S, Sadrzadeh-Afshar MS, Ebrahimi H. A Comparative Study of Low-Level Laser Therapy and Transcutaneous Electrical Nerve Stimulation as an Adjunct to Pharmaceutical Therapy for Myofascial Pain Dysfunction Syndrome: A Randomized Clinical Trial. *Frontiers in dentistry* 2019; 16(4): 256-64.
228. Mansuri B, Torabinezhad F, Jamshidi AA, Dabirmoghaddam P, Vasaghi-Gharamaleki B, Ghelichi L. Application of High-Frequency Transcutaneous Electrical Nerve Stimulation in Muscle Tension Dysphonia Patients With the Pain Complaint: The Immediate Effect. *Journal of Voice* 2019.
229. Mansuri B, Torabinezhad F, Jamshidi AA, Dabirmoghaddam P, Vasaghi-Gharamaleki B, Ghelichi L. Transcutaneous Electrical Nerve Stimulation Combined With Voice Therapy in Women With Muscle Tension Dysphonia. *Journal of Voice* 2020; 34(3): 490.e11-.e21.
230. Marchand S, Charest J, Li J, Chenard J, Lavignolle B, Laurencelle L. Is TENS purely a placebo effect? A controlled study on chronic low back pain [see comments]. *Pain* 1993; 54(1): 99-106.
231. Mascarin NC, Vancini RL, Andrade ML, Magalhaes Ede P, de Lira CA, Coimbra IB. Effects of kinesiotherapy, ultrasound and electrotherapy in management of bilateral knee osteoarthritis: prospective clinical trial. *BMC musculoskeletal disorders* 2012; 13: 182.
232. McCallum M, Glynn C, Moore R, Lammer P, Phillips A. Transcutaneous electrical nerve stimulation in the management of acute postoperative pain. *British journal of anaesthesia* 1988; 61(3): 308-12.
233. Melzack R, Vetere P, Finch L. Transcutaneous electrical nerve stimulation for low back pain. A comparison of TENS and massage for pain and range of motion. *Physical therapy* 1983; 63(4): 489-93.
234. Merrill D. Clinical evaluation of FastENS, an inexpensive, disposable transcutaneous electrical nerve stimulator designed specifically for postoperative electroanalgesia. *Urology* 1989; 33(1): 27-30.
235. Miller L, Mattison P, Paul L, Wood L. The effects of transcutaneous electrical nerve stimulation (TENS) on spasticity in multiple sclerosis. *Multiple sclerosis (Houndmills, Basingstoke, England)* 2007; 13(4): 527-33.
236. Milsom I, Hedner N, Mannheimer C. A comparative study of the effect of high-intensity transcutaneous nerve stimulation and oral naproxen on intrauterine pressure and menstrual pain in patients with primary dysmenorrhea. *American journal of obstetrics and gynecology* 1994; 170(1 Pt 1): 123-9.
237. Moharic M, Marincek C, Vidmar G, Burger H. TRANSCUTANEOUS ELECTRICAL NERVE STIMULATION, PREGABALIN AND THEIR COMBINATION IN PATIENTS WITH PAINFUL DIABETIC NEUROPATHY: EFFECTS ON PAIN AND QUALITY OF LIFE. *Zdravniški Vestnik-Slovenian Medical Journal* 2009; 78(8): 371-80.
238. Mondal P, Biswas M, Saha J, Middhya AK. Effect of Trigger Point Injection Vs Ultrasonic Therapy Vs Transcutaneous Electrical Nerve Stimulation in Rehabilitation of Cervical and Peri-Scapular Myofascial Pain Syndrome- a Randomized Clinical Trial. *Journal of Evolution of Medical and Dental Sciences-Jemds* 2019; 8(7): 430-6.

## 08\_OL-TABLE1\_IncludedStudies

239. Moore SR, Shurman J. Combined neuromuscular electrical stimulation and transcutaneous electrical nerve stimulation for treatment of chronic back pain: a double-blind, repeated measures comparison. *Archives of physical medicine and rehabilitation* 1997; 78(1): 55-60.
240. Mora B, Giorni E, Dobrovits M, et al. Transcutaneous electrical nerve stimulation: an effective treatment for pain caused by renal colic in emergency care. *The Journal of urology* 2006; 175(5): 1737-41; discussion 41.
241. Morgan B, Jones AR, Mulcahy KA, Finlay DB, Collett B. Transcutaneous electric nerve stimulation (TENS) during distension shoulder arthrography: a controlled trial. *Pain* 1996; 64(2): 265-7.
242. Møystad A, Krogstad BS, Larheim TA. Transcutaneous nerve stimulation in a group of patients with rheumatic disease involving the temporomandibular joint. *Journal of prosthetic dentistry* 1990; 64(5): 596-600.
243. Murray S, Collins PD, James MA. An investigation into the 'carry over' effect of neurostimulation in the treatment of angina pectoris. *International journal of clinical practice* 2004; 58(7): 669-74.
244. Mutlu B, Paker N, Bugdayci D, Tekdos D, Kesiktaş N. Efficacy of supervised exercise combined with transcutaneous electrical nerve stimulation in women with fibromyalgia: a prospective controlled study. *Rheumatology international* 2013; 33(3): 649-55.
245. Nabi BN, Sedighinejad A, Haghighi M, et al. Comparison of transcutaneous electrical nerve stimulation and pulsed radiofrequency sympathectomy for treating painful diabetic neuropathy. 2015; 5(5).
246. Nash TP, Williams JD, Machin D. TENS: Does the type of stimulus really matter? *Pain Clinic* 1990; 3(3): 161-8.
247. Navarathnam RG, Wang IY, Thomas D, Klineberg PL. Evaluation of the transcutaneous electrical nerve stimulator for postoperative analgesia following cardiac surgery. *Anaesthesia and intensive care* 1984; 12(4): 345-50.
248. Neary J. Transcutaneous electrical nerve stimulation for the relief of post-incisional surgical pain. *AANA J* 1981; 49(2): 151-5.
249. Neighbours LE, Clelland J, Jackson JR, Bergman J, Orr J. Transcutaneous electrical nerve stimulation for pain relief in primary dysmenorrhea. *The Clinical journal of pain* 1987; 3(1): 17-22.
250. Nesheim BI. The use of transcutaneous nerve stimulation for pain relief during labor. A controlled clinical study. *Acta obstetrica et gynecologica Scandinavica* 1981; 60(1): 13-6.
251. Neumark J, Pauser G, Scherzer W. Pain relief in childbirth; an analysis of the analgesic effects of transcutaneous nerve stimulation (TNS), pethidine and placebos (author's transl). *Praktische anästhesie, wiederbelebungs- und intensivtherapie* 1978; 13(1): 13-20.
252. Ng MM, Leung MC, Poon DM. The effects of electro-acupuncture and transcutaneous electrical nerve stimulation on patients with painful osteoarthritic knees: a randomized controlled trial with follow-up evaluation. *Journal of alternative and complementary medicine (New York, NY)* 2003; 9(5): 641-9.
253. Nordemar R, Thorner C. Treatment of acute cervical pain - A comparative group study. *Pain* 1981; 10(1): 93-101.
254. Norrbrink C. Transcutaneous electrical nerve stimulation for treatment of spinal cord injury neuropathic pain. *Journal of rehabilitation research and development* 2009; 46(1): 85-93.
255. Olsén MF, Elden H, Janson ED, Lilja H, Stener-Victorin E. A comparison of high- versus low-intensity, high-frequency transcutaneous electric nerve stimulation for painful postpartum uterine contractions. *Acta obstetrica et gynecologica Scandinavica* 2007; 86(3): 310-4.
256. Fagevik Olsen M, Bjordahl S, Stahl A, Borjesson S, Sundemo A, Gutke A. Effects of high-intensity high-frequency transcutaneous electric nerve stimulation in primary dysmenorrhea-a randomised cross-over pilot study. *European Journal of Physiotherapy* 2019.
257. Oncel M, Sencan S, Yildiz H, Kurt N. Transcutaneous electrical nerve stimulation for pain management in patients with uncomplicated minor rib fractures. *European journal of cardio-thoracic surgery : official journal of the European Association for Cardio-thoracic Surgery* 2002; 22(1): 13-7.
258. Oosterhof J, De Boo TM, Oostendorp RA, Wilder-Smith OH, Crul BJ. Outcome of transcutaneous electrical nerve stimulation in chronic pain: short-term results of a double-blind, randomised, placebo-controlled trial. *The journal of headache and pain* 2006; 7(4): 196-205.
259. Oosterhof J, Samwel HJ, de Boo TM, Wilder-Smith OH, Oostendorp RA, Crul BJ. Predicting outcome of TENS in chronic pain: a prospective, randomized, placebo controlled trial. *Pain* 2008; 136(1-2): 11-20.
260. Oosterhof J, Wilder-Smith OH, de Boo T, Oostendorp RA, Crul BJ. The long-term outcome of transcutaneous electrical nerve stimulation in the treatment for patients with chronic pain: a randomized, placebo-controlled trial. *Pain practice : the official journal of World Institute of Pain* 2012; 12(7): 513-22.
261. Oosterhof J, Wilder-Smith OH, Oostendorp RA, Crul BJ. Different mechanisms for the short-term effects of real versus sham transcutaneous electrical nerve stimulation (TENS) in patients with chronic pain: a pilot study. *Journal of pain & palliative care pharmacotherapy* 2012; 26(1): 5-12.

## 08\_OL-TABLE1\_IncludedStudies

262. Ordog GJ. Transcutaneous electrical nerve stimulation versus oral analgesic: a randomized double-blind controlled study in acute traumatic pain. *The American journal of emergency medicine* 1987; 5(1): 6-10.
263. Ozkaraoglu DK, Tarakci D, Algun ZC. Comparison of two different electrotherapy methods in low back pain treatment. *Journal of Back & Musculoskeletal Rehabilitation* 2020; 33(2): 193-9.
264. Ozkul C, Kilinc M, Yildirim SA, Topcuoglu EY, Akyuz M. Effects of visual illusion and transcutaneous electrical nerve stimulation on neuropathic pain in patients with spinal cord injury: A randomised controlled cross-over trial. *Journal of back and musculoskeletal rehabilitation* 2015; 28(4): 709-19.
265. Oztas B, Iyigun E. The effects of two different electrical stimulation methods on the pain intensity of the patients who had undergone abdominal surgery with a midline incision: Randomized Controlled Clinical Trial. *Contemporary nurse* 2019: 1-21.
266. Ozturk NK, Baki ED, Kavakli AS, et al. Comparison of Transcutaneous Electrical Nerve Stimulation and Parasternal Block for Postoperative Pain Management after Cardiac Surgery. *Pain research & management* 2016; 2016: 4261949.
267. Padma, Prasanna A, Urala. Transcutaneous electrical nerve stimulation and labor pain. *Bahrain Medical Bulletin* 2000; 22(1): 13-7.
268. Paker N, Tekdos D, Kesiktas N, Soy D. Comparison of the therapeutic efficacy of TENS versus intra-articular hyaluronic acid injection in patients with knee osteoarthritis: a prospective randomized study. *Advances in therapy* 2006; 23(2): 342-53.
269. Palmer S, Domaille M, Cramp F, et al. Transcutaneous electrical nerve stimulation as an adjunct to education and exercise for knee osteoarthritis: a randomized controlled trial. *Arthritis care & research* 2014; 66(3): 387-94.
270. Pan P, Chou C, Chiou H, Ma H, Lee H, Chan R. Extracorporeal shock wave therapy for chronic calcific tendinitis of the shoulders: a functional and sonographic study. *Archives of Physical Medicine & Rehabilitation* 2003; 84(7): 988-93.
271. Park C, Choi JB, Lee YS, et al. The effect of intra-operative transcutaneous electrical nerve stimulation on posterior neck pain following thyroidectomy. *Anaesthesia* 2015; 70(4): 434-9.
272. Patil SR, Aileni KR. Effect of transcutaneous electrical nerve stimulation versus home exercise programme in management of temporomandibular joint disorder. *Journal of Clinical and Diagnostic Research* 2017; 11(12): ZC19-ZC22.
273. Peacock KS, Stoerkel E, Libretto S, et al. A randomized trial comparing the Tennant Biomodulator to transcutaneous electrical nerve stimulation and traditional Chinese acupuncture for the treatment of chronic pain in military service members. *Military Medical Research* 2019; 6(1): 37.
274. Pietrosimone BG, Hart JM, Saliba SA, Hertel J, Ingersoll CD. Immediate effects of transcutaneous electrical nerve stimulation and focal knee joint cooling on quadriceps activation. *Medicine and science in sports and exercise* 2009; 41(6): 1175-81.
275. Pietrosimone BG, Saliba SA, Hart JM, Hertel J, Kerrigan DC, Ingersoll CD. Effects of transcutaneous electrical nerve stimulation and therapeutic exercise on quadriceps activation in people with tibiofemoral osteoarthritis. *The Journal of orthopaedic and sports physical therapy* 2011; 41(1): 4-12.
276. Pietrosimone BG, Saliba SA, Hart JM, Hertel J, Kerrigan DC, Ingersoll CD. Effects of disinhibitory transcutaneous electrical nerve stimulation and therapeutic exercise on sagittal plane peak knee kinematics and kinetics in people with knee osteoarthritis during gait: a randomized controlled trial. *Clinical rehabilitation* 2010; 24(12): 1091-101.
277. Pietrosimone B, Luc-Harkey BA, Harkey MS, et al. Using TENS to Enhance Therapeutic Exercise in Individuals with Knee Osteoarthritis. *Medicine and science in sports and exercise* 2020.
278. Pike PM. Transcutaneous electrical stimulation. Its use in the management of postoperative pain. *Anaesthesia* 1978; 33(2): 165-71.
279. Pitangui AC, de Sousa L, Gomes FA, Ferreira CH, Nakano AM. High-frequency TENS in post-episiotomy pain relief in primiparous puerpere: a randomized, controlled trial. *The journal of obstetrics and gynaecology research* 2012; 38(7): 980-7.
280. Pitangui AC, Araújo RC, Bezerra MJ, Ribeiro CO, Nakano AM. Low and high-frequency TENS in post-episiotomy pain relief: a randomized, double-blind clinical trial. *Brazilian journal of physical therapy* 2014; 18(1): 72-8.
281. Platon B, Andrell P, Raner C, Rudolph M, Dvoretzky A, Mannheimer C. High-frequency, high-intensity transcutaneous electrical nerve stimulation as treatment of pain after surgical abortion. *Pain* 2010; 148(1): 114-9.
282. Platon B, Mannheimer C, Andrell P. Effects of high-frequency, high-intensity transcutaneous electrical nerve stimulation versus intravenous opioids for pain relief after gynecologic laparoscopic surgery: a randomized controlled study. *Korean Journal of Anesthesiology* 2018; 71(2): 149-56.
283. Prabhakar R, Ramteke G. Cervical Spinal Mobilization Versus TENS in the Management of Cervical Radiculopathy: A Comparative, Experimental, Randomized controlled trial. *Indian Journal of Physiotherapy and Occupational Therapy* 2011; 5(2): 128-33.

## 08\_OL-TABLE1\_IncludedStudies

284. Presser M, Birkhan J, Adler R, Hanani A, Eisenberg E. Transcutaneous electrical nerve stimulation (TENS) during epidural steroids injection: a randomized controlled trial. *Pain Clinic* 2000; 12(2): 77-80.
285. Rainov NG, Heidecke V, Albertz C, Burkert W. Transcutaneous electrical nerve stimulation (TENS) for acute postoperative pain after spinal surgery. *European Journal of Pain* 1994; 15(2-3): 44-9.
286. Rajfur J, Pasternok M, Rajfur K, et al. Efficacy of Selected Electrical Therapies on Chronic Low Back Pain: a Comparative Clinical Pilot Study. *Medical science monitor* 2017; 23: 85-100.
287. Rajpurohit B, Khatri SM, Metgud D, Bagewadi A. Effectiveness of transcutaneous electrical nerve stimulation and microcurrent electrical nerve stimulation in bruxism associated with masticatory muscle pain--a comparative study. *Indian journal of dental research : official publication of Indian Society for Dental Research* 2010; 21(1): 104-6.
288. Raket B, Frantz R. Effectiveness of transcutaneous electrical nerve stimulation on postoperative pain with movement. *The journal of pain : official journal of the American Pain Society* 2003; 4(8): 455-64.
289. Raket BA, Zimmerman MB, Geasland K, et al. Transcutaneous electrical nerve stimulation for the control of pain during rehabilitation after total knee arthroplasty: A randomized, blinded, placebo-controlled trial. *Pain* 2014; 155(12): 2599-611.
290. Ramanathan D, Saleh A, Klika AK, Higuera CA, Barsoum WK. The Use of Transcutaneous Electrical Nerve Stimulation After Total Knee Arthroplasty: A Prospective Randomized Controlled Trial. *Surgical technology international* 2017; 30: 425-34.
291. Ramos LAV, Callegari B, Franca FJR, et al. Comparison Between Transcutaneous Electrical Nerve Stimulation and Stabilization Exercises in Fatigue and Transversus Abdominis Activation in Patients With Lumbar Disk Herniation: A Randomized Study. *Journal of manipulative and physiological therapeutics* 2018; 41(4): 323-31.
292. Rani P, Kalyani V, Goyal T, Yadav R, Mishra R. Effect of Transcutaneous Electrical Nerve Stimulation Therapy on Pain and Functional Disability Level among Patients with Rotator Cuff Disease- a Randomized Controlled Trial. *International Journal of Physiotherapy* 2020; 7(1): 7-13.
293. Ratajczak B, Hawrylak A, Demidaś A, Kuciel-Lewandowska J, Boerner E. Effectiveness of diadynamic currents and transcutaneous electrical nerve stimulation in disc disease lumbar part of spine. *Journal of Back & Musculoskeletal Rehabilitation* 2011; 24(3): 155-9.
294. Rawat B, Genz A, Fache JS, Ong M, Coldman AJ, Burhenne HJ. Effectiveness of transcutaneous electrical nerve stimulation (TENS) for analgesia during biliary lithotripsy. *Invest Radiol* 1991; 26(10): 866-9.
295. Renovato França FJ, Nogueira Burke T, Oliveira Magalhães M, et al. Motor Control Training Compared With Transcutaneous Electrical Nerve Stimulation in Patients With Disc Herniation With Associated Radiculopathy: A Randomized Controlled Trial. *American journal of physical medicine & rehabilitation* 2019; 98(3): 207-14.
296. Reuss R, Cronen P, Abplanalp L. Transcutaneous electrical nerve stimulation for pain control after cholecystectomy: lack of expected benefits. *Southern medical journal* 1988; 81(11): 1361-3.
297. Revadkar MT, Bhojwani TM. Comparison of the Effectiveness of Transcutaneous Electrical Nerve Stimulation (Tens) Vs. Interferential Therapy (Ift) for Relief of Pain in Primary Dysmenorrhea. *International Journal of Physiotherapy* 2019; 6(6): 263-7.
298. Ringel G, Taubert K. Zur effektivität der transkutanen elektrischen nervenstimulation bei migrane (The efficacy of transcutaneous nerve stimulation in migraine) [German]. *Zeitschrift für Physiotherapie* 1991 Jan;43(1):8-11 1991.
299. Robb KA, Newham DJ, Williams JE. Transcutaneous electrical nerve stimulation vs. transcutaneous spinal electroanalgesia for chronic pain associated with breast cancer treatments. *Journal of pain and symptom management* 2007; 33(4): 410-9.
300. Robinson R, Darlow S, Wright SJ, et al. Is transcutaneous electrical nerve stimulation an effective analgesia during colonoscopy? *Postgraduate medical journal* 2001; 77(909): 445-6.
301. Roche PA, Gijsbers K, Belch JJ, Forbes CD. Modification of haemophilic haemorrhage pain by transcutaneous electrical nerve stimulation. *Pain* 1985; 21(1): 43-8.
302. Rooney SM, Jain S, Goldiner PL. Effect of transcutaneous nervous stimulation on postoperative pain after thoracotomy. *Anesthesia and analgesia* 1983; 62(11): 1010-2.
303. Rosenberg M, Curtis L, Bourke D. Transcutaneous electrical nerve stimulation for the relief of postoperative pain. *Pain* 1978; 5(2): 129-33.
304. Rutgers MJ, Van-Romunde L, Osman P. A small randomised comparative trial of acupuncture verses transcutaneous electrical neurostimulation in postherpetic neuralgia. *Pain Clinic* 1988; 2: 87-9.
305. Sadala AY, Machado AFP, Liebano RE. Effects of transcutaneous electrical nerve stimulation on pain intensity during application of carboxytherapy in patients with cellulite: A randomized placebo-controlled trial. *Journal of cosmetic dermatology* 2018; 17(6): 1175-81.
306. Sahin N, Albayrak I, Ugurlu H. Effect of different transcutaneous electrical stimulation modalities on cervical myofascial pain syndrome. *Journal of Musculoskeletal Pain* 2011; 19(1): 18-23.



## 08\_OL-TABLE1\_IncludedStudies

307. Samadzadeh S, Rezavand N, Yari M, Rezaei M, Faizmahdavi H, Hematti M. Comparison of Entonox and Transcutaneous Electrical Nerve Stimulation (TENS) in labor pain. *Journal of Medical and Biomedical Sciences* 2017; 6(2): 11-6.
308. Sangtong K, Chupinijrobkob C, Putthakumnerd W, Kuptniratsaikul V. Does adding transcutaneous electrical nerve stimulation to therapeutic ultrasound affect pain or function in people with osteoarthritis of the knee? A randomized controlled trial. *Clinical rehabilitation* 2019; 33(7): 1197-205.
309. Santamato A, Notarnicola A, Panza F, et al. SBOTE study: Extracorporeal shock wave therapy versus electrical stimulation after botulinum toxin type a injection for post-stroke spasticity—a prospective randomized trial. *Ultrasound in Medicine and Biology* 2013; 39(2): 283-91.
310. Santana LS, Gallo RB, Ferreira CH, Duarte G, Quintana SM, Marcolin AC. Transcutaneous electrical nerve stimulation (TENS) reduces pain and postpones the need for pharmacological analgesia during labour: a randomised trial. *Journal of physiotherapy* 2016; 62(1): 29-34.
311. Saranya B, Ahmed J, Shenoy N, Ongole R, Sujir N, Natarajan S. Comparison of Transcutaneous Electric Nerve Stimulation (TENS) and Microcurrent Nerve Stimulation (MENS) in the Management of Masticatory Muscle Pain: A Comparative Study. *Pain research & management* 2019; 2019: 8291624.
312. Sayilir S, Yildizgoren MT. The medium-term effects of diadynamic currents in chronic low back pain; TENS versus diadynamic currents: a randomised, follow-up study. *Complementary therapies in clinical practice* 2017; 29: 16-9.
313. Seo HG, Bang MS, Chung SG, Jung SH, Lee S-U. Effect of Electrical Stimulation on Botulinum Toxin A Therapy in Patients With Chronic Myofascial Pain Syndrome: A 16-Week Randomized Double-Blinded Study. *Archives of Physical Medicine & Rehabilitation* 2013; 94(3): 412-8.
314. Serry ZMH, Mossa G, Elhabashy H, et al. Transcutaneous nerve stimulation versus aerobic exercise in diabetic neuropathy. *Egyptian Journal of Neurology, Psychiatry and Neurosurgery* 2016; 53(2): 124-9.
315. Sezen CB, Akboga SA, Celik A, Kalafat CE, Tastepe AI. Transcutaneous electrical nerve stimulation effect on postoperative complications. *Asian cardiovascular & thoracic annals* 2017; 25(4): 276-80.
316. Shahoei R, Shahghebi S, Rezaei M, Naqshbandi S. The effect of transcutaneous electrical nerve stimulation on the severity of labor pain among nulliparous women: A clinical trial. *Complementary therapies in clinical practice* 2017; 28: 176-80.
317. Shehab D, Adham N. Comparative effectiveness of ultrasound and transcutaneous electrical stimulation in treatment of periarticular shoulder pain. *Physiother Can* 2000; 52(3): 208-14.
318. Sherry E, Kitchener P, Smart R. A prospective randomized controlled study of VAX-D and TENS for the treatment of chronic low back pain. *Neurological research* 2001; 23(7): 780-4.
319. Shimoji K, Takahashi N, Nishio Y, Koyanagi M, Aida S. Pain relief by transcutaneous electric nerve stimulation with bidirectional modulated sine waves in patients with chronic back pain: a randomized, double-blind, sham-controlled study. *Neuromodulation* 2007 Jan;10(1):42-51 2007.
320. Shimoura K, Iijima H, Suzuki Y, Aoyama T. Immediate Effects of Transcutaneous Electrical Nerve Stimulation on Pain and Physical Performance in Individuals With Preradiographic Knee Osteoarthritis: A Randomized Controlled Trial. *Archives of Physical Medicine & Rehabilitation* 2019; 100(2): 300-.
321. Shoukry RA, Al-Ansary AM. Transcutaneous Electric Nerve Stimulation (TENS) for pain relief during Extracorporeal Shock-Wave Lithotripsy (ESWL). *Egyptian Journal of Anaesthesia* 2019; 35(1): 65-70.
322. Siemens W, Boehlke C, Bennett MI, Offner K, Becker G, Gaertner J. Transcutaneous electrical nerve stimulation for advanced cancer pain inpatients in specialist palliative care—a blinded, randomized, sham-controlled pilot cross-over trial. *Supportive Care in Cancer* 2020.
323. Sikiru L, Shmaila H, Muhammed SA. Transcutaneous electrical nerve stimulation (TENS) in the symptomatic management of chronic prostatitis/chronic pelvic pain syndrome: a placebo-control randomized trial. *International braz j urol : official journal of the Brazilian Society of Urology* 2008; 34(6): 708-13; discussion 14.
324. Silva MB, de Melo PR, de Oliveira NM, Crema E, Fernandes LF. Analgesic effect of transcutaneous electrical nerve stimulation after laparoscopic cholecystectomy. *American journal of physical medicine & rehabilitation* 2012; 91(8): 652-7.
325. Silva JG, Gonçalves Santana C, Inocência KR, Orsini M, Machado S, Bergmann A. Electrocortical Analysis of Patients with Intercostobrachial Pain Treated with TENS after Breast Cancer Surgery. *Journal of Physical Therapy Science* 2014; 26(3): 349-53.
326. Sim DT. Effectiveness of transcutaneous electrical nerve stimulation following cholecystectomy. *Physiotherapy* 1991; 77(10): 715-22.
327. Siqueira LTD, Ribeiro VV, Moreira PAM, Brasolotto AG, de Jesus Guirro RR, Alves Silverio KC. Effects of transcutaneous electrical nervous stimulation (TENS) associated with vocal therapy on musculoskeletal pain of women with behavioral dysphonia: A randomized, placebo-controlled double-blind clinical trial. *Journal of communication disorders* 2019; 82: N.PAG.

## 08\_OL-TABLE1\_IncludedStudies

328. Sloan JP, Muwanga CL, Waters EA, Dove AF, Dave SH. Multiple rib fractures: transcutaneous nerve stimulation versus conventional analgesia. *The Journal of trauma* 1986; 26(12): 1120-2.
329. Smania N, Corato E, Fiaschi A, Pietropoli P, Aglioti SM, Tinazzi M. Repetitive magnetic stimulation: a novel therapeutic approach for myofascial pain syndrome. *Journal of neurology* 2005; 252(3): 307-14.
330. Smedley F, Taube M, Wastell C. Transcutaneous electrical nerve stimulation for pain relief following inguinal hernia repair: a controlled trial. *European surgical research Europäische chirurgische Forschung Recherches chirurgicales europeennes* 1988; 20(4): 233-7.
331. Smith C, Lewith G, Machin D. Preliminary study to establish a controlled method of assessing transcutaneous nerve stimulation as a treatment for the pain caused by osteoarthritis of the knee. *Physiotherapy* 1983; 69: 266-8.
332. Smith C, Guralnick M, Gelfand M, Jeans M. The effects of transcutaneous electrical nerve stimulation on post-cesarean pain. *Pain* 1986; 27(2): 181-93.
333. Sodipo JO, Adedeji SA, Olumide O. Postoperative pain relief by transcutaneous electrical nerve stimulation (TENS). *The American journal of Chinese medicine* 1980; 8(1-2): 190-4.
334. Solak O, Turna A, Pekcolaklar A, Metin M, Sayar A, Gurses A. Transcutaneous electric nerve stimulation for the treatment of postthoracotomy pain: a randomized prospective study. *The Thoracic and cardiovascular surgeon* 2007; 55(3): 182-5.
335. Solak O, Emmiler M, Ela Y, et al. Comparison of continuous and intermittent transcutaneous electrical nerve stimulation in postoperative pain management after coronary artery bypass grafting: A randomized, placebo-controlled prospective study. *Heart Surgery Forum* 2009; 12(5): E266-E71.
336. Sonde L, Gip C, Fernaes SE, Nilsson CG, Viitanen M. Stimulation with low frequency (1.7 Hz) transcutaneous electric nerve stimulation (low-tens) increases motor function of the post-stroke paretic arm. *Scandinavian journal of rehabilitation medicine* 1998; 30(2): 95-9.
337. Stepanovic A, Kolsek M, Kersnik J, Erculj V. Prevention of post-herpetic neuralgia using transcutaneous electrical nerve stimulation. *Wiener klinische Wochenschrift* 2015; 127(9-10): 369-74.
338. Steptoe P, Bo JO. Pain-relieving effect of transcutaneous nerve stimulation during delivery. A study among primiparas. *Ugeskrift for laeger* 1984; 146(42): 3186-8.
339. Stratton S, Smith M. Postoperative thoracotomy. Effect of transcutaneous electrical nerve stimulation on forced vital capacity. *Physical therapy* 1980; 60(1): 45-7.
340. Stubbing JF, Jellicoe JA. Transcutaneous electrical nerve stimulation after thoracotomy. Pain relief and peak expiratory flow rate--a trial of transcutaneous electrical nerve stimulation. *Anaesthesia* 1988; 43(4): 296-8.
341. Suh HR, Kim TH, Han GS. The Effects of High-Frequency Transcutaneous Electrical Nerve Stimulation for Dental Professionals with Work-Related Musculoskeletal Disorders: A Single-Blind Randomized Placebo-Controlled Trial. *Evidence-Based Complementary and Alternative Medicine* 2015.
342. Talbot LA, Solomon Z, Webb L, Morrell C, Metter EJ. Electrical Stimulation Therapies for Active Duty Military with Patellofemoral Pain Syndrome: A Randomized Trial. *Military medicine* 2020.
343. Tantawy SA, Kamel DM, Abdelbasset WK. Does transcutaneous electrical nerve stimulation reduce pain and improve quality of life in patients with idiopathic chronic orchialgia? A randomized controlled trial. *Journal of Pain Research* 2018; 11: 77-82.
344. Taylor P, Hallett M, Flaherty L. Treatment of osteoarthritis of the knee with transcutaneous electrical nerve stimulation. *Pain* 1981; 11(2): 233-40.
345. Taylor A, West B, Simon B, Skelton J, Rowlingson J. How effective is TENS for acute pain? *Am J Nurs* 1983; 83(8): 1171-4.
346. Thakur R, Patidar RJJOGI. Comparative study of transcutaneous electrical nerve stimulation (TENS) and tramadol hydrochloride for pain relief in labor. 2004; 54(4): 346-50.
347. Thomas IL, Tyle V, Webster J, Neilson A. An evaluation of transcutaneous electrical nerve stimulation for pain relief in labour. *The Australian & New Zealand journal of obstetrics & gynaecology* 1988; 28(3): 182-9.
348. Thomas M, Lundeberg T, Bjork G, Lundstrom-Lindstedt V. Pain and discomfort in primary dysmenorrhea is reduced by preemptive acupuncture or low frequency TENS. *European Journal of Physical Medicine and Rehabilitation* 1995; 5(3): 71-6.
349. Thorsteinsson G, Stonnington HH, Stillwell GK, Elveback LR. The placebo effect of transcutaneous electrical stimulation. *Pain* 1978; 5(1): 31-41.
350. Tilak M, Isaac SA, Fletcher J, et al. Mirror Therapy and Transcutaneous Electrical Nerve Stimulation for Management of Phantom Limb Pain in Amputees - A Single Blinded Randomized Controlled Trial. *Physiotherapy research international : the journal for researchers and clinicians in physical therapy* 2016; 21(2): 109-15.
351. Tokuda M, Tabira K, Masuda T, Nishiwada T, Shomoto K. Effect of modulated-frequency and modulated-intensity transcutaneous electrical nerve stimulation after abdominal surgery: a randomized controlled trial. *The Clinical journal of pain* 2014; 30(7): 565-70.
352. Tonella RM, Araujo S, Da Silva AMO. Transcutaneous electrical nerve stimulation in the relief of pain related to physical therapy after abdominal surgery. [Portuguese, English]. *Revista brasileira de anesthesiologia* 2006; 56(6): 630-42.

## 08\_OL-TABLE1\_IncludedStudies

353. Topuz O, Ozfidan E, Ozgen M, Ardic F. Efficacy of transcutaneous electrical nerve stimulation and percutaneous neuromodulation therapy in chronic low back pain. *Journal of back and musculoskeletal rehabilitation* 2004; 17(3-4): 127-33.
354. Tosato J, Biasotto-Gonzalez D, Caria PJFP. Effect of massage therapy and of transcutaneous electrical nerve stimulation on pain and electromyographic activity in patients with temporomandibular dysfunction. 2007; 14: 21-6.
355. Treacy K. Awareness/relaxation training and transcutaneous electrical neural stimulation in the treatment of bruxism. *Journal of oral rehabilitation* 1999; 26(4): 280-7.
356. Tsen LC, Thomas J, Segal S, Datta S, Bader AM. Transcutaneous electrical nerve stimulation does not augment combined spinal epidural labour analgesia. *Canadian journal of anaesthesia = Journal canadien d'anesthésie* 2000; 47(1): 38-42.
357. Tsen LC, Thomas J, Segal S, Datta S, Bader AM. Transcutaneous electrical nerve stimulation does not augment epidural labor analgesia. *Journal of clinical anesthesia* 2001; 13(8): 571-5.
358. Tsukayama H, Yamashita H, Amagai H, Tanno Y. Randomised controlled trial comparing the effectiveness of electroacupuncture and TENS for low back pain: a preliminary study for a pragmatic trial. *Acupuncture in medicine : journal of the British Medical Acupuncture Society* 2002; 20(4): 175-80.
359. Tucker DL, Rockett M, Hasan M, Poplar S, Rule SA. Does transcutaneous electrical nerve stimulation (TENS) alleviate the pain experienced during bone marrow sampling in addition to standard techniques? A randomised, double-blinded, controlled trial. *Journal of clinical pathology* 2015; 68(6): 479-83.
360. Tugay N, Akbayrak T, Demirturk F, et al. Effectiveness of transcutaneous electrical nerve stimulation and interferential current in primary dysmenorrhea. *Pain medicine (Malden, Mass)* 2007; 8(4): 295-300.
361. Tulgar M, McGlone F, Bowsher D, Miles JB. Comparative effectiveness of different stimulation modes in relieving pain. Part I. A pilot study. *Pain* 1991; 47(2): 151-5.
362. Tulgar M, McGlone F, Bowsher D, Miles JB. Comparative effectiveness of different stimulation modes in relieving pain. Part II. A double-blind controlled long-term clinical trial. *Pain* 1991; 47(2): 157-62.
363. Unterrainer AF, Friedrich C, Krenn MH, Piotrowski WP, Golaszewski SM, Hitzl W. Postoperative and preincisional electrical nerve stimulation TENS reduce postoperative opioid requirement after major spinal surgery. *Journal of neurosurgical anesthesiology* 2010; 22(1): 1-5.
364. Unterrainer AF, Uebles FX, Gross FA, Werner GG, Krombholz MA, Hitzl W. TENS compared to opioids in postoperative analgesic therapy after major spinal surgery with regard to cognitive function. *Middle east journal of anaesthesiology* 2012; 21(6): 815-21.
365. Upton GA, Tinley P, Al-Aubaidy H, Crawford R. The influence of transcutaneous electrical nerve stimulation parameters on the level of pain perceived by participants with painful diabetic neuropathy: A crossover study. *Diabetes & metabolic syndrome* 2017; 11(2): 113-8.
366. Vaidya SM. Sacroiliac joint mobilisation versus transcutaneous electrical nerve stimulation for pregnancy induced posterior pelvic pain-a randomised clinical trial. *Journal of Clinical and Diagnostic Research* 2018; 12(1): YC04-YC7.
367. Vaillancourt S, Coulombe-Lévêque A, Fradette J, et al. Combining transcutaneous electrical nerve stimulation with therapeutic exercise to reduce pain in an elderly population: a pilot study. *Disability and rehabilitation* 2019: 1-8.
368. Valenza MC, Torres-Sanchez I, Cabrera-Martos I, Valenza-Demet G, Cano-Cappellacci M. Acute Effects of Contract-Relax Stretching vs. TENS in Young Subjects With Anterior Knee Pain: A Randomized Controlled Trial. *Journal of strength and conditioning research* 2016; 30(8): 2271-8.
369. van der Ploeg JM, Vervest HA, Liem AL, Schagen van Leeuwen JH. Transcutaneous nerve stimulation (TENS) during the first stage of labour: a randomized clinical trial. *Pain* 1996; 68(1): 75-8.
370. van der Spank JT, Cambier DC, De\_Paepe HM, Danneels LA, Witvrouw EE, Beerens L. Pain relief in labour by transcutaneous electrical nerve stimulation (TENS). *Archives of gynecology and obstetrics* 2000; 264(3): 131-6.
371. Vance CG, Rakel BA, Blodgett NP, et al. Effects of transcutaneous electrical nerve stimulation on pain, pain sensitivity, and function in people with knee osteoarthritis: a randomized controlled trial. *Physical therapy* 2012; 92(7): 898-910.
372. Vitalii C, Oleg P. The efficiency of transcutaneous electrical nerve stimulation in association with gabapentin in the treatment of neuropathic pain in patients with spinal cord injury. *Romanian Journal of Neurology/ Revista Romana de Neurologie* 2014; 13(4): 193-6.
373. Vrouva S, Batistaki C, Paraskevaidou E, et al. Comparative study of pain relief in two non-pharmacological treatments in patients with partial rotator cuff tears: A randomized trial. *Anesthesiology and Pain Medicine* 2019; 9(2).
374. Walker RH, Morris BA, Angulo DL, Schneider J, Colwell CW, Jr. Postoperative use of continuous passive motion, transcutaneous electrical nerve stimulation, and continuous cooling pad following total knee arthroplasty. *The Journal of arthroplasty* 1991; 6(2): 151-6.



## 08\_OL-TABLE1\_IncludedStudies

375. Wang SF, Lee JP, Hwa HL. Effect of transcutaneous electrical nerve stimulation on primary dysmenorrhea. *Neuromodulation* 2009; 12(4): 302-9.
376. Warfield CA, Stein JM, Frank HA. The effect of transcutaneous electrical nerve stimulation on pain after thoracotomy. *The Annals of thoracic surgery* 1985; 39(5): 462-5.
377. Warke K, Al-Smadi J, Baxter GD, Walsh DM, Lowe-Strong AS. A double blind, placebo controlled, randomised, clinical trial investigating the efficacy of transcutaneous electrical nerve stimulation for low back pain in a multiple sclerosis population. *Multiple Sclerosis* 2004; 10(7032): S107-S.
378. Warke K, Al-Smadi J, Baxter D, Walsh D, Lowe-Strong A. Efficacy of transcutaneous electrical nerve stimulation (tens) for chronic low-back pain in a multiple sclerosis population: a randomized, placebo-controlled clinical trial. *Clinical Journal of Pain* 2006; 22(9): 812-9.
379. Yameen F, Shahbaz NN, Hasan Y, Fauz R, Abdullah M. Efficacy of transcutaneous electrical nerve stimulation and its different modes in patients with trigeminal neuralgia. *JPMA The Journal of the Pakistan Medical Association* 2011; 61(5): 437-9.
380. Yesil H, Hepguler S, Dundar U, Taravati S, Isleten B. Does the Use of Electrotherapies Increase the Effectiveness of Neck Stabilization Exercises for Improving Pain, Disability, Mood, and Quality of Life in Chronic Neck Pain?: A Randomized, Controlled, Single-Blind Study. *Spine* 2018; 43(20): E1174-e83.
381. Yilmaz M, Tarakci D, Tarakci E. Comparison of high-intensity laser therapy and combination of ultrasound treatment and transcutaneous nerve stimulation on cervical pain associated with cervical disc herniation: A randomized trial. *Complementary therapies in medicine* 2020; 49: 102295.
382. Yilmazer M, Kose S, Ario DT, Koken G, Ozbulut O. Efficacy of transcutaneous electrical nerve stimulation for pain relief in women undergoing office endometrial biopsy. *Archives of gynecology and obstetrics* 2012; 285(4): 1059-64.
383. Yokoyama M, Sun X, Oku S, et al. Comparison of percutaneous electrical nerve stimulation with transcutaneous electrical nerve stimulation for long-term pain relief in patients with chronic low back pain. *Anesthesia and Analgesia* 2004; 98(6): 1552-6
384. Yoshimizu M, Teo AR, Ando M, Kiyohara K, Kawamura T. Relief of chronic shoulder and neck pain by electro-acupuncture and transcutaneous electrical nervous stimulation: A randomized crossover trial. *Medical Acupuncture* 2012; 24(2): 97-103.
385. Yüksel M, Ayaş Ş, Cabioglu MT, Yilmaz D, Cabioglu C. Quantitative Data for Transcutaneous Electrical Nerve Stimulation and Acupuncture Effectiveness in Treatment of Fibromyalgia Syndrome. *Evidence-based Complementary and Alternative Medicine* 2019; 2019.
386. Yurtkuran M, Kocagil T. TENS, electroacupuncture and ice massage: comparison of treatment for osteoarthritis of the knee. *American Journal of Acupuncture* 1999; 27(3-4): 133-40.
387. Zakariaee SS, Shahoei R, Nosab LH, Moradi G, Farshbaf M. The Effects of Transcutaneous Electrical Nerve Stimulation on Post-Episiotomy Pain Severity in Primiparous Women: A Randomized, Controlled, Placebo Clinical Trial. *Galen Medical Journal* 2019; 8: UNSP e1404.
388. Zhang Y, Zhang J, Wang L, Wang K, Svensson P. Effect of transcutaneous electrical nerve stimulation on jaw movement-evoked pain in patients with TMJ disc displacement without reduction and healthy controls. *Acta Odontologica Scandinavica* 2020; 78(4): 309-20.
389. Zhou MM, Li F, Lu WB, Wu JF, Pei S. Efficiency of Neuromuscular Electrical Stimulation and Transcutaneous Nerve Stimulation on Hemiplegic Shoulder Pain: A Randomized Controlled Trial. *Archives of Physical Medicine and Rehabilitation* 2018; 99(9): 1730-9.
