# Supplementary material for: Efficacy and safety of transcutaneous electrical nerve stimulation (TENS) for acute and chronic pain in adults: a systematic review and meta-analysis of 381 studies (the meta-TENS study)
Source: PubMed Central journal article supplement — BMJ Open. 2022 Feb 10;12(2):e051073. doi: 10.1136/bmjopen-2021-051073 (PMC8845179; doi:10.1136/bmjopen-2021-051073), 2022-02-10
Supplement: bmjopen-2021-051073supp003.pdf [file bmjopen-2021-051073supp003.pdf]

09\_OL-TABLE2\_AwaitingClassification

**Online Table 2****Records Awaiting Classification**

| Reference                                 | Language     | Reason             |
|-------------------------------------------|--------------|--------------------|
| Aiyejusunle et al. 2007 <sup>1</sup>      | Not reported | Need to obtain PDF |
| Chen et al. 2007 <sup>2</sup>             | Chinese      | Needs translation  |
| Houshyar et al. 2015 <sup>3</sup>         | Persian      | Needs translation  |
| Kim et al. 2020 <sup>4</sup>              | Not reported | Need to obtain PDF |
| Kumar and Rahim 2019 <sup>5</sup>         | Not reported | Need to obtain PDF |
| Mehlhorn et al. 2005 <sup>6</sup>         | German       | Needs translation  |
| Pourmomeny et al. 2009 <sup>7</sup>       | Persian      | Needs translation  |
| Renklitepe et al. 1995 <sup>8</sup>       | Not reported | Need to obtain PDF |
| Sakai et al. 2001 <sup>9</sup>            | Japanese     | Needs translation  |
| Tokuda et al. 2013 <sup>10</sup>          | Japanese     | Needs translation  |
| Tunc et al. 2002 <sup>11</sup>            | Not reported | Need to obtain PDF |
| van der Pierjil et al. 1998 <sup>12</sup> | Not reported | Needs translation  |
| Wang et al. 2005 <sup>13</sup>            | Not reported | Need to obtain PDF |
| Xiao et al. 2002 <sup>14</sup>            | Not reported | Need to obtain PDF |
| Zati et al. 2004 <sup>15</sup>            | Italian      | Needs translation  |
| Zheng et al., 2011 <sup>16</sup>          | Chinese      | Needs translation  |
| Zhang et al. 2014 <sup>17</sup>           | Chinese      | Needs translation  |
| Zhong and Zhang 2017 <sup>18</sup>        | Not reported | Need to obtain PDF |
| Zhou et al. 2009 <sup>19</sup>            | Not reported | Need to obtain PDF |

**REFERENCES – STUDIES AWAITING CLASSIFICATION\***

\*Note: Reference numbering in this list relates only to studies cited in this table

1. Aiyejusunle CB, Kola-Korolo TA, Ajiboye OA. Comparison of the effects of TENS and sodium salicylate iontophoresis in the management of osteoarthritis of the knee. *Nigerian Quarterly Journal of Hospital Medicine* 2007; 17(1): 30-4.
2. Chen L, Zhang XL, Ding H, Tao YQ, Zhan HS. Comparative study on effects of manipulation treatment and transcutaneous electrical nerve stimulation on patients with cervicogenic headache. [Chinese]. *Journal of Chinese Integrative Medicine* 2007; 5(4): 403-6.
3. Houshyar AE, Rezaie HH, Jahani Y, Kazemi M, Monfared S. Comparison of two methods of aromatherapy with lavender essence and Transcutaneous Electrical Nerve Stimulation (TENS) on cesarean postoperative pain. [Persian]. *Iranian Journal of Obstetrics, Gynecology and Infertility* 2015; 18(146): 6-12.
4. Kim B, Lohman E, Yim J. Acupuncture-like Transcutaneous Electrical Nerve Stimulation for Pain, Function, and Biochemical Inflammation After Total Knee Arthroplasty. *Alternative Therapies in Health and Medicine* 2020. [Volume, issue and pages not provided]
5. Kumar SS, Abdul Rahim A. A study on effectiveness of conventional mode TENS on trismus. *Research Journal of Pharmacy and Technology* 2019; 12(3): 1193-6.
6. Mehlhorn G, Beckmann M, Schild R, Binder HJGuF. Analgesie von schmerzhaften Nachwehen mittels transkutaner elektrischer Nervenstimulation (TENS) vs. Metamizol. 2005; 65(03): 266-71.
7. Pourmomeny AA, Amini M, Safaei H, Hassanzadeh A. The effect of electroanalgesia on pain relief in patient with diabetic neuropathy type II. [Arabic]. *Iranian Journal of Endocrinology and Metabolism* 2009; 11(4): 363-472.
8. Renklitepe N, Dogan N, Kayhan O, Ozaras N. Effects of different TENS electrode types in degenerative joint disease of the hands. [Turkish]. *Fizik Tedavi Rehabilitasyon Dergisi* 1995; 19(4): 204-8.

09\_OL-TABLE2\_AwaitingClassification

9. Sakai T, Tsutani K, Tsukayama H. (Multi center randomized controlled trial of acupuncture with electric stimulation and acupuncture-like transcutaneous electrical nerve stimulation for lumbago) [Japanese]. *Zen Nippon Shinkyu Gagai Zasshi [Journal of Japan Society of Acupuncture and Moxibustion]* 2001; 51(2): 175-184.
10. Tokuda M, Tabira K, Masuda T, Nishiwada T, Shomoto K. Effect of Transcutaneous Electrical Nerve Stimulation after Abdominal Surgery-A Randomized Controlled Trial. *Rigakuryoho Kagaku* 2013; 28(4): 415-21.
11. Tunc M, Gunal H, Bilgili T, Ulus F, Tunc H, Savkilioglu E. The effect of TENS on epidural patient controlled analgesia with tramadol for postthoracotomy pain relief. [Turkish]. *Turk Anesteziyoloji ve Reanimasyon* 2002; 30(7): 315-21.
12. van dPI, Smits A, Verwer J. Elektrodeplaatsing bij TENS: een pilot-studie. *Nederlands Tijdschrift fur Fysiotherapie* 1998; 108(5): 128-31.
13. Wang N XB, Wei X, Li M, Xu Y. A clinical controlled study of immediate analgesia effect of TENS on post-operative pain after total knee replacement. *Chinese Journal of Rehabilitation Medicine* 2005; 20: 188-90.
14. Xiao H, She SZ, Xu LX. (Effects of transcutaneous electric nerve stimulation on the postoperative analgesia with PCEA and recovery after surgery) [Chinese - simplified characters]. *Zhongguo Linchuang Kangfu [Chinese Journal of Clinical Rehabilitation]* 2002; 6(12):1784-1785.
15. Zati A, Fortuna D, Valent A, Pulvirenti F, Bilotta TW. Treatment of low back pain caused by intervertebral disk displacement: comparison between high power laser, TENS and NSAIDs. *Medicina Dello Sport* 2004; 57(1): 77-82.
16. Zheng G, Huang X, Zhao X. Influence of neuromuscular electrical stimulation of muscoli quadriceps femoris on motor function rehabilitation after total knee replacement; 2011; 26: 1126-1130.
17. Zhang Q, Zhang JH, Tong PJ. [Application of transcutaneous electrical nerve stimulation to multimodal analgesia after total knee arthroplasty]. *Zhongguo Gu Shang [China Journal of Orthopaedics and Traumatology]* 2014; 27(4): 283-6.
18. Zhong J, Zhang L. [Transcutaneous electrical acupoint stimulation for pregnancy of in vitro fertilization-embryo transfer]. *Zhongguo Zhen Jiu [Chinese Acupuncture & Moxibustion]* 2017; 37(3): 253-5.
19. Zhou GY, Zhou GS, Jian-hong J. Clinical observation on transcutaneous electrical acupoint stimulation for treatment of functional dyspepsia. [Chinese]. *Zhongguo Zhen Jiu [Chinese Acupuncture & Moxibustion]* 2009; 29(6): 436-40.
