# Supplementary material for: Efficacy and safety of transcutaneous electrical nerve stimulation (TENS) for acute and chronic pain in adults: a systematic review and meta-analysis of 381 studies (the meta-TENS study)
Source: PubMed Central journal article supplement — BMJ Open. 2022 Feb 10;12(2):e051073. doi: 10.1136/bmjopen-2021-051073 (PMC8845179; doi:10.1136/bmjopen-2021-051073), 2022-02-10
Supplement: bmjopen-2021-051073supp004.pdf [file bmjopen-2021-051073supp004.pdf]

10\_OL-TABLE3\_ExcludedStudies

## ONLINE TABLE 3

## Excluded studies, with reasons, based on screening full text records

| Reference                                   | Reason for exclusion                                                                             | Description of study                                                                                                                                                                                                                                                                                                                                                                                                                                            |
|---------------------------------------------|--------------------------------------------------------------------------------------------------|-----------------------------------------------------------------------------------------------------------------------------------------------------------------------------------------------------------------------------------------------------------------------------------------------------------------------------------------------------------------------------------------------------------------------------------------------------------------|
| Aguilar Ferrandiz et al., 2016 <sup>1</sup> | Not standard TENS - auto-targeted neurostimulation                                               | Evaluated Nervomatrix Soleve® auto-targeted neurostimulation device providing TENS-stimulation and mechanical pressure for chronic low back pain. Technical specifications differ from a standard TENS device                                                                                                                                                                                                                                                   |
| Albayrak, 2017 <sup>2</sup>                 | Not an RCT                                                                                       | Evaluated TENS on persistent post-surgical pain after total knee arthroplasty. Retrospective study of prospectively collected data                                                                                                                                                                                                                                                                                                                              |
| Alhusaini et al., 2019 <sup>3</sup>         | No pain outcomes – Primary outcomes grip strength and function; secondary outcome manual ability | Evaluated TENS combined with therapeutic exercises for hand function by reducing spasticity in children with hemiplegic cerebral palsy                                                                                                                                                                                                                                                                                                                          |
| Altas et al., 2019 <sup>4</sup>             | Not possible to isolate TENS                                                                     | Evaluated the effect of physical therapy modalities on pain, sleep, mental status, and quality of life of patients with osteoarthritis.                                                                                                                                                                                                                                                                                                                         |
| Al Zamil et al., 2019 <sup>5</sup>          | Not full report - Abstract of conference presentation                                            | Evaluated TENS of median nerves and acupuncture in the treatment of carpal tunnel syndrome                                                                                                                                                                                                                                                                                                                                                                      |
| Askin et al., 2014 <sup>6</sup>             | Not possible to isolate effect of TENS                                                           | Evaluated ultrasound therapy for stellate ganglion blockade in complex regional pain syndrome type I. TENS delivered in combination with drug medication, contrast bath and exercise to all groups.                                                                                                                                                                                                                                                             |
| Atalay et al., 2009 <sup>7</sup>            | No pain outcomes                                                                                 | Evaluated TENS for viability of skin flaps created during mastectomy in breast cancer patients. No pain outcomes                                                                                                                                                                                                                                                                                                                                                |
| Augustinsson et al., 1977 <sup>8</sup>      | Not an RCT                                                                                       | Evaluated TENS for pain during delivery labour pain). Open label pre-post study single group study without comparison intervention(s)                                                                                                                                                                                                                                                                                                                           |
| Avramidis et al., 2003 <sup>9</sup>         | Not standard TENS – neuromuscular electrical stimulation                                         | Evaluated electric muscle stimulation during rehabilitation after total knee arthroplasty - MicroStim 2-channel (MS-2) neuromuscular stimulator                                                                                                                                                                                                                                                                                                                 |
| Aydin et al., 2015 <sup>10</sup>            | TENS administered internally - intravaginal                                                      | Evaluated vaginal electrical stimulation for sexual function using the insertion of a vaginal probe inserted delivering medium-frequency (50 Hz) alternating current (duty cycle 5 seconds on followed by 5 seconds off) generated by a MyoBravo electro stimulation instrument (MTR+ Vertiebs GmbH, Berlin)                                                                                                                                                    |
| Aydogan et al., 2014 <sup>11</sup>          | Not standard TENS - Frequency Rhythmic Electrical Modulation System                              | Evaluated pre-emptive frequency rhythmic electrical modulation using a Phyback device (PBK2C) in patients undergoing lumbar stabilization                                                                                                                                                                                                                                                                                                                       |
| Ayyildiz et al. 2004 <sup>12</sup>          | Not an RCT                                                                                       | Evaluated TENS for pain associated with extracorporeal short-wave lithotripsy. Open label pre-post study single group study without comparison intervention(s).                                                                                                                                                                                                                                                                                                 |
| Bai et al., 2018 <sup>13</sup>              | Not standard TENS - transcutaneous electric acupoint stimulation                                 | Evaluated transcutaneous electric acupoint stimulation (TEAS) on stress response during extubation after general anaesthesia in patients undergoing elective supratentorial craniotomy. Primary purpose of TEAS was not to treat pain. TEAS was administered using a Hwato electronic acupuncture treatment instrument (model no.: SDZ-II) delivering an alternate dense- disperse frequency of 2/10 Hz (2 Hz for 10 s and 10 Hz) to various acupuncture points |
| Behm et al., 2019 <sup>14</sup>             | Not pain outcomes - Fatigue rather than pain                                                     | Evaluated if TENS-induced pain suppression would augment force output during a fatiguing protocol in the treated and contralateral muscles.                                                                                                                                                                                                                                                                                                                     |
| Belmonte et al., 2012 <sup>15</sup>         | Not standard TENS - microcurrent electrical stimulation and bioresonance device                  | Evaluated low-frequency low-intensity electrotherapy in the treatment of chronic upper limb breast cancer-related lymphoedema. Used a Flowave2Home device delivering microcurrents via a wave of carrier frequency ranging from 0.31 to 6.16 Hz and a modulation between 400 and 2120 Hz; the low offset voltage is always between +12 and -12 V.                                                                                                               |
| Bouaff and Ellouze, 2019 <sup>16</sup>      | Not an RCT                                                                                       | Evaluated modulated PWM-TENS for non-cancer pain. PWM-TENS used sinusoidal waves sinusoidal carrier whose frequency varies according to the mode of stimulation. There was a comparison with 'classical TENS' but this was not a RCT.                                                                                                                                                                                                                           |
| Bundsens et al., 1981 <sup>17</sup>         | Not an RCT                                                                                       | Evaluated TENS for labour pain. Retrospective (stated as prospective in title) open label questionnaire with each patient matched with a control without randomisation.                                                                                                                                                                                                                                                                                         |
| Burch et al., 2008 <sup>18</sup>            | Not standard TENS - low-current TENS (0.5mA used as control)                                     | Evaluated combination of interferential and patterned muscle stimulation for osteoarthritis of knee. Control group received low-current TENS biphasic square wave with a 0.2 Hz frequency and a fixed amplitude of 60 mA, with pulse width adjusted to provide a net output of 73 nC and delivered across 300 microseconds equivalent to a peak output of 0.5 mA. This did not meet our criteria for standard TENS                                              |
| Burssens et al., 2003 <sup>19</sup>         | No pain outcomes                                                                                 | Evaluated burst TENS on the healing of Achilles tendon suture                                                                                                                                                                                                                                                                                                                                                                                                   |
| Carbonario et al., 2013 <sup>20</sup>       | Not an RCT                                                                                       | Evaluated TENS for tender points in fibromyalgia. Patients were allocated 'sequentially' and there was no mention of randomisation within the report (quasi-RCT). This was included in the Cochrane review on Fibromyalgia.                                                                                                                                                                                                                                     |

10\_OL-TABLE3\_ExcludedStudies

| Reference                               | Reason for exclusion                                                                                       | Description of study                                                                                                                                                                                                                                                                                                                                                                                               |
|-----------------------------------------|------------------------------------------------------------------------------------------------------------|--------------------------------------------------------------------------------------------------------------------------------------------------------------------------------------------------------------------------------------------------------------------------------------------------------------------------------------------------------------------------------------------------------------------|
| Chao et al., 2007 <sup>21</sup>         | TENS delivered to acupuncture points distant to pain                                                       | Evaluated TENS on acupuncture points for pain during the first stage of labour using two pairs of electrodes placed at bilateral Li 4 (Hegu) points (midpoint between first and second carpal bones, first web space dorsal side) and Sp6 (Sanyinjiao) points (5 cm above medial malleolus in lower leg)                                                                                                           |
| Chee and Walton 1986 <sup>22</sup>      | Not standard TENS - microcurrent electrical stimulation                                                    | Evaluated treatment of trigger points with micro amperage TENS using an Electro-acuscope 80 stimulator                                                                                                                                                                                                                                                                                                             |
| Cheing and Hui-Chan, 2004 <sup>23</sup> | No pain outcomes                                                                                           | Evaluated addition of TENS to exercise training for knee osteoarthritis but measured functional outcomes only. There were no pain outcomes in report                                                                                                                                                                                                                                                               |
| Chen et al., 2013 <sup>24</sup>         | Not standard TENS electrodes                                                                               | Evaluated TENS for knee osteoarthritis using silver spike point electrodes, similar to IFT suction cups, rather than self-adhering carbon-rubber TENS electrodes                                                                                                                                                                                                                                                   |
| Chen et al. 2013 <sup>25</sup>          | TENS on acupuncture points using TEAS                                                                      | Evaluated electroacupuncture, TENS and acupoint massage on periarthritis of shoulder.                                                                                                                                                                                                                                                                                                                              |
| Chen et al., 2015 <sup>26</sup>         | Not standard TENS - transcutaneous electric acupoint stimulation                                           | Evaluated transcutaneous electric acupoint stimulation on post-procedural abdominal pain after colonoscopy at Jiaji (EX-B2) points were located on both sides of the spinous column using a Han's Acupoint Nerve Stimulator (HANS-200A, Nanjing Jisheng Medical Technology Co., Ltd., Nanjing, China), delivering a dense-and-disperse frequency at 2/100 Hz for 30 min prior to induction.                        |
| Chen et al., 2015 <sup>27</sup>         | Not standard TENS - transcutaneous electric acupoint stimulation                                           | Evaluated transcutaneous electric acupoint stimulation for remifentanyl-induced hyperalgesia in patients undergoing thyroidectomy and delivered as 30 min of stimulation (6-9 mA, 2/10 Hz) on the Hegu (LI4) and Neiguan (PC6) before anaesthesia (pre-emptive) and terminated before the end of surgery. Stimulation was not at site of pain or over nerve bundles.                                               |
| Chen et al., 2015 <sup>28</sup>         | Not standard TENS - transcutaneous electric acupoint stimulation                                           | Evaluated transcutaneous electric acupoint stimulation on postoperative quality of recovery after thyroidectomy with general anaesthesia administered at bilateral Hegu (LI4) and Neiguan (PC6) before induction of anaesthesia (pre-emptive). TEAS was delivered at a disperse-dense frequency of 2/10 Hz and an intensity of 6-9 mA for 30 min using the Hans electronic acupuncture apparatus (HANS-100A)       |
| Chen et al., 2020 <sup>29</sup>         | Not Standard TENS -TEAS                                                                                    | Evaluated efficacy of TEAS for sedation and postoperative analgesia in lung cancer patients undergoing thoracoscopic pulmonary resection.                                                                                                                                                                                                                                                                          |
| Cheng and Pomeranz, 1986 <sup>30</sup>  | Not standard TENS - Codetron                                                                               | Evaluated 'acupuncture-like stimulation' using a Codetron device for chronic musculoskeletal pain and delivering currents randomly to acupuncture points at different locations on the body via seven electrodes.                                                                                                                                                                                                  |
| Chiu et al., 1999 <sup>31</sup>         | TENS delivered to acupuncture points distant to pain                                                       | Evaluated TENS for pain during hemorrhoidectomy. Electrodes were positioned on acupuncture points distant to the painful area (i.e. dorsal web between the first and the second metacarpal bones (Hegu, Large Intestine meridian, 4th ampoin, negative electrode) and on radial side 3 cm proximal to the wrist crease (Lieque, Lung meridian, 7th ampoin, positive electrode) using a Han Acutens, WQ1002F device |
| Coletta et al., 1988 <sup>32</sup>      | Unable to isolate TENS effects                                                                             | Evaluated TENS vs. TENS + ointment containing Etofenamate. Not possible to isolate effects of TENS                                                                                                                                                                                                                                                                                                                 |
| Conn et al., 1986 <sup>33</sup>         | Some participants not adults                                                                               | Evaluated TENS for pain following appendicectomy. Included children (minimum age = 13 years (TENS), 15 (sham) and 13 (control))                                                                                                                                                                                                                                                                                    |
| Cornell et al., 1984 <sup>34</sup>      | Not an RCT                                                                                                 | Evaluated TENS for pain following foot surgery. Data gathered prospectively during TENS was compared with retrospective data of patients that did not receive TENS harvested from medical records                                                                                                                                                                                                                  |
| Demidas et al., 2019 <sup>35</sup>      | Healthy humans                                                                                             | Evaluated touch and pain sensations and the correlation between them in diadynamic current and TEN.S                                                                                                                                                                                                                                                                                                               |
| Duzjy et al., 2020 <sup>36</sup>        | Not full report – Abstract of conference poster presentation                                               | Evaluated effect of TENS therapy in the pain management of women after caesarean delivery.                                                                                                                                                                                                                                                                                                                         |
| Dodick et al., 2015 <sup>37</sup>       | Not standard TENS - invasive technique                                                                     | Evaluated peripheral nerve stimulation (PNS) of the occipital nerves for managing chronic migraine using implanted with a neurostimulation system Not TENS                                                                                                                                                                                                                                                         |
| Eidy et al., 2016 <sup>38</sup>         | TENS given pre-emptive to general anaesthesia / surgery - pain measured after surgery with no TENS post op | Evaluated effects of preoperative TENS on post inguinal hernia repair pain                                                                                                                                                                                                                                                                                                                                         |
| Ertzgaard et al., 2018 <sup>39</sup>    | Not standard TENS electrodes                                                                               | Evaluation of TENS for spasticity using an AT Mollii® electrotherapy system consisting of a two-piece garment equipped with 58 electrodes and a control unit.                                                                                                                                                                                                                                                      |
| Fagade and Obilade, 2003 <sup>40</sup>  | No pain outcomes                                                                                           | Evaluated TENS on post-IMF trismus and pain in Nigerian Patients. No pain outcomes                                                                                                                                                                                                                                                                                                                                 |

10\_OL-TABLE3\_ExcludedStudies

| Reference                                 | Reason for exclusion                                                                                                                                                                                                                                                                           | Description of study                                                                                                                                                                                                                                                                                                                                                                                                                                                                                                                                                                                                                                                                                                                                                                                                                            |
|-------------------------------------------|------------------------------------------------------------------------------------------------------------------------------------------------------------------------------------------------------------------------------------------------------------------------------------------------|-------------------------------------------------------------------------------------------------------------------------------------------------------------------------------------------------------------------------------------------------------------------------------------------------------------------------------------------------------------------------------------------------------------------------------------------------------------------------------------------------------------------------------------------------------------------------------------------------------------------------------------------------------------------------------------------------------------------------------------------------------------------------------------------------------------------------------------------------|
| Fargas-Babjak et al., 1989 <sup>41</sup>  | Not standard TENS – Codetron                                                                                                                                                                                                                                                                   | Evaluated ‘acupuncture-like stimulation’ for osteoarthritis of the hip or knee using a Codetron device                                                                                                                                                                                                                                                                                                                                                                                                                                                                                                                                                                                                                                                                                                                                          |
| Fargas-Babjak et al., 1992 <sup>42</sup>  | Not standard TENS – Codetron                                                                                                                                                                                                                                                                   | Evaluated ‘acupuncture-like stimulation’ for chronic pain syndrome or osteoarthritis using a Codetron device                                                                                                                                                                                                                                                                                                                                                                                                                                                                                                                                                                                                                                                                                                                                    |
| Fary et al., 2011 <sup>43</sup>           | Not standard TENS - subsensory pulsed electrical stimulation                                                                                                                                                                                                                                   | Evaluated pulsed electrical stimulation for osteoarthritis of the knee using a commercially available TENS stimulator (Metron Digi-10s) that was modified by a biomedical engineer to deliver pulsed, asymmetrically biphasic, exponentially decreasing waveform currents with a frequency of 100 Hz and pulse width of 4 msec. Author’s state “ <i>Participants attached the device and turned the intensity up until they could feel pins and needles or a prickling sensation under one or both electrodes. After achieving sensory output, participants were instructed to turn the intensity down until they could no longer feel any electrical stimulation. At this stage, a built-in locking mechanism was engaged that prevented subsequent adjustment of intensity without restarting the device.</i> ” Thus, subsensory stimulation. |
| Fletcher-Smith et al., 2019 <sup>44</sup> | Not standard TENS - Neuromuscular Electrical Stimulation “... current intensity was increased to produce an alternating contraction of the flexors and extensors using a flex-hold-extend-hold pattern, ensuring that a pure movement was produced with no/minimal ulnar or radial deviation.” | Evaluated feasibility of initiating electrical stimulation treatment of wrist extensors and flexors in patients early after stroke to prevent muscle contractures and pain.                                                                                                                                                                                                                                                                                                                                                                                                                                                                                                                                                                                                                                                                     |
| Gadsby et al., 1997 <sup>45</sup>         | TENS delivered to acupuncture points distant to pain                                                                                                                                                                                                                                           | Evaluated acupuncture-like TENS within palliative care delivered to acupuncture points PC6 (Neiguan) and LI4 (Hegu) of the dominant hand                                                                                                                                                                                                                                                                                                                                                                                                                                                                                                                                                                                                                                                                                                        |
| Gao et al., 2017 <sup>46</sup>            | Not standard TENS - transcutaneous electric acupoint stimulation                                                                                                                                                                                                                               | Evaluated transcutaneous electric acupoint stimulation for procedural pain during and post thyroidectomy administered at PC6 (Neiguan) and LI4 (Hegu) and distant from the painful site. Full article in Chinese.                                                                                                                                                                                                                                                                                                                                                                                                                                                                                                                                                                                                                               |
| Garaud et al., 2018 <sup>47</sup>         | Cannot isolate effects of TENS                                                                                                                                                                                                                                                                 | Evaluated efficacy of TENS in the treatment LBP when associated to a therapeutic education program (TEP).                                                                                                                                                                                                                                                                                                                                                                                                                                                                                                                                                                                                                                                                                                                                       |
| Garland et al., 2007 <sup>48</sup>        | Not standard TENS - highly optimized, capacitively coupled, pulsed electrical stimulator                                                                                                                                                                                                       | Evaluated highly optimized, capacitively coupled, pulsed electrical stimulator for osteoarthritis of the knee using a knee garment with flexible, embedded electrodes and a small battery-operated generator that produced a 100-Hz, negative pulsed signal (BioniCare Medical Technologies, Inc., Sparks, Maryland.). Authors state - “ <i>They then turned on the device, increased the signal amplitude to between 0 and 12 V by rotating a dial until a tingling sensation was felt over the knee or thigh, and then reducing the amplitude until this sensation disappeared. Thus, active treatment remained imperceptible and indistinguishable from placebo.</i> ” P631 and “In fact, TENS and PES differ in many ways.” P635                                                                                                            |
| Gaul et al., 2016 <sup>49</sup>           | Not standard TENS - invasive vagus nerve stimulation                                                                                                                                                                                                                                           | Evaluated non-invasive vagus nerve stimulation for prevention and acute treatment of chronic cluster headache using “... a low-voltage electrical signal (5-kHz sine wave series that occurred for 1 ms and repeated every 40 ms (25Hz)).” p 535                                                                                                                                                                                                                                                                                                                                                                                                                                                                                                                                                                                                |
| Geirsson et al., 1993 <sup>50</sup>       | Not standard TENS - posterior tibial nerve stimulation                                                                                                                                                                                                                                         | Evaluated TENS of the tibial nerve in patients with interstitial cystitis using electrodes positioned over the tibial nerve on the foot. Thus, TENS delivered distant to symptoms. Posterior tibial nerve stimulation is a neuromodulation technique to treat overactive bladder and associated symptoms. TENS is administered over tibial nerve distant from sensations associated with urinary urgency.                                                                                                                                                                                                                                                                                                                                                                                                                                       |
| Ghonomie et al., 1999c <sup>51</sup>      | Not standard TENS - percutaneous electrical nerve stimulation                                                                                                                                                                                                                                  | Evaluated the effect of stimulus frequency on response to percutaneous electrical nerve stimulation in patients with chronic low back pain delivered via ten, 32-gauge (0.2 mm) stainless steel acupuncture-like needle probes placed into soft tissue and/or muscle in the low back region to a depth of 2–4 cm.                                                                                                                                                                                                                                                                                                                                                                                                                                                                                                                               |
| Gokce et al., 2020 <sup>52</sup>          | Not RCT                                                                                                                                                                                                                                                                                        | Evaluated bilateral transcutaneous tibial nerve stimulation on constipation severity in geriatric patients with refractory chronic constipation.                                                                                                                                                                                                                                                                                                                                                                                                                                                                                                                                                                                                                                                                                                |
| Gottfried et al., 2019 <sup>53</sup>      | Not focussed on pain - Not TENS - abstract                                                                                                                                                                                                                                                     | Evaluated transcutaneous vagal nerve stimulation improves symptoms, pain, and gastric emptying in patients with idiopathic gastroparesis.                                                                                                                                                                                                                                                                                                                                                                                                                                                                                                                                                                                                                                                                                                       |
| Govil et al., 2020 <sup>54</sup>          | Not RCT                                                                                                                                                                                                                                                                                        | Evaluated extent to which genetic variability modifies Transcutaneous Electrical Nerve Stimulation (TENS) effectiveness in osteoarthritic knee pain                                                                                                                                                                                                                                                                                                                                                                                                                                                                                                                                                                                                                                                                                             |
| Gu et al., 2019 <sup>55</sup>             | Not standard TENS - TEAS                                                                                                                                                                                                                                                                       | Evaluated effects of TEAS on gastrointestinal function recovery after laparoscopic radical gastrectomy                                                                                                                                                                                                                                                                                                                                                                                                                                                                                                                                                                                                                                                                                                                                          |
| Gorodetskyi et al., 2007 <sup>56</sup>    | Not standard TENS - non-invasive interactive neurostimulation (InterX)                                                                                                                                                                                                                         | Evaluated non-invasive interactive neurostimulation in the post-operative recovery of patients with a trochanteric fracture of the femur. Currents delivered using a handheld, non-invasive, interactive neurostimulation device (InterX 5000; Neuro Resource Group, Plano, Texas) device that “... generates a high peak amplitude averaging 17 volts on the skin with a low current of about 6 mA, and damped biphasic electrical impulses which are delivered to the tissue through a pair of concentric electrodes placed in direct contact with the target area. The device is able to adjust its strength and damping of the biphasic stimulus changes in accordance with the impedance of the underlying tissue (Fig. 1), resulting in a highly sensitive and variable voltage in order to maintain constant peak current.”              |

10\_OL-TABLE3\_ExcludedStudies

| Reference                                   | Reason for exclusion                                                               | Description of study                                                                                                                                                                                                                                                                                                                                                                                                                                                                                                        |
|---------------------------------------------|------------------------------------------------------------------------------------|-----------------------------------------------------------------------------------------------------------------------------------------------------------------------------------------------------------------------------------------------------------------------------------------------------------------------------------------------------------------------------------------------------------------------------------------------------------------------------------------------------------------------------|
| Harrison et al., 1987 <sup>57</sup>         | Not an RCT – May also be using part of sample in Harrison 1986                     | Evaluated TENS for labour pain. Patient self-selected treatment – not random allocation/RCT “All patients were informed about the methods of analgesia available, including TENS. They were asked if they had decided upon a specific form of analgesia and what it was. Information regarding the trial and its aims was then given to all potential participants and those giving informed consent were enrolled in their specific group of choice.”                                                                      |
| Hedner et al., 1996 <sup>58</sup>           | Not an RCT – narrative review                                                      | This is a narrative overview that describes the RCT by Milson et al., 1994 - included                                                                                                                                                                                                                                                                                                                                                                                                                                       |
| Herman et al., 1994 <sup>59</sup>           | Not standard TENS - Codetron                                                       | Evaluated ‘acupuncture-like stimulation’ using a Codetron device for acute occupational low back pain. Codetron is a neuromodulation technique described as the delivery of acupuncture-like stimulation to six locations on the body in a random order.                                                                                                                                                                                                                                                                    |
| Hettrick et al., 2004 <sup>60</sup>         | No pain outcome – measured itch                                                    | Evaluated the role of TENS for the management of burn-related pruritus                                                                                                                                                                                                                                                                                                                                                                                                                                                      |
| Hsieh et al., 1992 <sup>61</sup>            | Not an RCT – analysis of scales used in an RCT by <sup>62</sup> which was excluded | Evaluated reliability of instruments used in a RCT of transcutaneous muscle stimulation on chronic low back pain. This publication pre-empted publication of RCT by Pope et al., 1994                                                                                                                                                                                                                                                                                                                                       |
| Huang et al., 2017 <sup>63</sup>            | Not standard TENS - transcutaneous electric acupoint stimulation                   | Evaluated transcutaneous electrical acupoint stimulation at different frequencies on perioperative anaesthetic dosage, recovery, complications, and prognosis in video-assisted thoracic surgical lobectomy delivered to acupoints Neiguan (PC6), Hegu (LI4), Lieque (LU7), and Quchi (LI11) distant from pain and using a HANS-200A Acupoint Stimulator and frequency set as 2/100, 2, or 100 Hz in the dense-and-disperse mode before, during and post-surgery                                                            |
| Huang et al., 2018 <sup>64</sup>            | Not standard TENS - transcutaneous electric acupoint stimulation                   | Evaluated transcutaneous electrical acupoint stimulation for recovery after laparoscopic colorectal cancer resection delivered to ST36 (leg) distant to pain before and during surgery                                                                                                                                                                                                                                                                                                                                      |
| Huang et al., 2019 <sup>65</sup>            | Not standard TENS - transcutaneous electrical acupoint stimulation                 | Evaluated transcutaneous electrical acupoint stimulation for pain in patients “in expansion process of skin soft tissue dilator on forehead by water injection applied to acupuncture points at the wrist (PC6), forehead (shangxing) and diwei points. Article in Chinese                                                                                                                                                                                                                                                  |
| Ing et al., 2015 <sup>66</sup>              | Not standard TENS - microampere rather than milliampere                            | Evaluated TENS for chronic postherpetic neuralgia using electronic neuroadaptive regulation (SCENAR) delivered using a Tennant Biomodulator (TBM) device. The authors state “ <i>The major difference between SCENAR and TBM devices and the traditional TENS units is that the former devices utilize microamps, not the milliamps utilized by the TENS units.</i> ” P477                                                                                                                                                  |
| Issenman et al., 1985 <sup>67</sup>         | Not an RCT                                                                         | Evaluated TENS for pain control after spinal fusion with Harrington rods and assessed ‘hospital charts’ of patients who used TENS with sex and age matched controls. It was described as an evaluation of the effectiveness of their postoperative pain management programme with no statement that this was a prospective study with randomisation                                                                                                                                                                         |
| Itoh et al., 2008 <sup>68</sup>             | Not standard TENS – electrical characteristics are interferential therapy          | Evaluated TENS for osteoarthritis of the knee versus acupuncture or acupuncture combined with TENS or topical poultice. The authors describe this as TENS but inspection of the reported electric characteristics suggest this is IFT “single-channel portable TENS unit (model HVF3000, OMRON Healthcare Co Ltd, Japan), which sends between two electrodes a premixed amplitude-modulated frequency of 122 Hz (beat frequency) generated by two medium frequency sinusoidal waves of 4.0 and 4.122 kHz (feed frequency).” |
| Itoh et al., 2009 <sup>69</sup>             | Not standard TENS – electrical characteristics are interferential therapy          | Evaluated TENS for chronic low back pain versus acupuncture or acupuncture combined with TENS or topical poultice. The authors describe this as TENS but inspection of the reported electric characteristics suggest this is IFT “single-channel portable TENS unit (model HVF3000, OMRON Healthcare Co Ltd, Japan), which sends between two electrodes a premixed amplitude-modulated frequency of 122 Hz (beat frequency) generated by two medium frequency sinusoidal waves of 4.0 and 4.122 kHz (feed frequency).”      |
| Jarden et al., 1999 <sup>70</sup>           | Conference abstract - ? reporting RCT by Jarzem et al., 2005 (included)            | Evaluated conventional transcutaneous electrical nerve stimulation [TENS] with sham therapy using a randomized double-blind crossover design.<br>Transcutaneous electrical nerve stimulation for non-acute low back pain: a randomized double-blind study of conventional, nu-waveform, acupuncture-type and sham therapies.                                                                                                                                                                                                |
| Jeans et al., 1979 <sup>71</sup>            | Not an RCT                                                                         | Evaluated the effect of brief, intense transcutaneous electrical stimulation on chronic pain                                                                                                                                                                                                                                                                                                                                                                                                                                |
| Jiang et al., 2019 <sup>72</sup>            | Not standard TENS - Cefaly                                                         | Evaluated efficacy and safety of combination therapy of flunarizine plus transcutaneous supraorbital neurostimulation (tSNS) compared with either flunarizine or tSNS alone for migraine prophylaxis                                                                                                                                                                                                                                                                                                                        |
| Juarez-Albuixech et al., 2019 <sup>73</sup> | Not RCT                                                                            | Evaluated efficacy of Volta Therapy and transcutaneous electrical nerve stimulation (TENS) in the treatment of lumbosciatica                                                                                                                                                                                                                                                                                                                                                                                                |

10\_OL-TABLE3\_ExcludedStudies

| Reference                           | Reason for exclusion                                                                                                                                         | Description of study                                                                                                                                                                                                                                                                                                                                                                                                                                                                                                                                                                                                 |
|-------------------------------------|--------------------------------------------------------------------------------------------------------------------------------------------------------------|----------------------------------------------------------------------------------------------------------------------------------------------------------------------------------------------------------------------------------------------------------------------------------------------------------------------------------------------------------------------------------------------------------------------------------------------------------------------------------------------------------------------------------------------------------------------------------------------------------------------|
| Junger et al., 2008 <sup>74</sup>   | Not standard TENS - microcurrent electrical stimulation                                                                                                      | Evaluated Local therapy and treatment costs of chronic, venous leg ulcers treated with electrical stimulation using a Dermapulse device (Geromed, Hamburg, Germany) delivering currents with varying polarity at a pulse frequency of 128 Hz and an average current strength of 300 microamperes (initially 300 mA, if pain or paraesthesia was noted, it was reduced)                                                                                                                                                                                                                                               |
| Kaplan et al., 1994 <sup>75</sup>   | Not an RCT                                                                                                                                                   | Evaluated TENS for dysmenorrhea. Open label single group without a comparison group                                                                                                                                                                                                                                                                                                                                                                                                                                                                                                                                  |
| Katz and Melzack 1991 <sup>76</sup> | TENS delivered to acupuncture points distant to pain                                                                                                         | Evaluated low frequency high intensity auricular TENS for phantom limb pain.                                                                                                                                                                                                                                                                                                                                                                                                                                                                                                                                         |
| Kempf et al., 2018 <sup>77</sup>    | Not standard TENS – H wave                                                                                                                                   | Evaluated short-term application of High-Tone Electrical Muscle Stimulation (HTEMS) compared to Transcutaneous Electrical Nerve Stimulation (TENS) with chronic sciatica.                                                                                                                                                                                                                                                                                                                                                                                                                                            |
| Kho et al., 1991 <sup>78</sup>      | Unable to isolate TENS effects                                                                                                                               | Evaluated transcutaneous stimulation combined with acupuncture for surgery for retroperitoneal lymph node dissection major surgery. Not possible to isolate the effects of TENS from those of acupuncture                                                                                                                                                                                                                                                                                                                                                                                                            |
| Kocyigit et al., 2012 <sup>79</sup> | Not an RCT – experimental study                                                                                                                              | Evaluated effects of Low-frequency Transcutaneous Electrical Nerve Stimulation on Central Pain Modulation in patients with subacromial impingement syndrome of the shoulder. The experimental paradigm was to evaluate pain-induced activation in the brain during low-frequency TENS application in response to experimentally induced painful stimuli although the nature of the stimuli unclear “ <i>The involved arm of the patient was grasped by the researcher</i> ”                                                                                                                                          |
| Kolen et al., 2012 <sup>80</sup>    | Not standard TENS device or electrodes                                                                                                                       | Evaluated different ways of delivering TENS for osteoarthritis of the knee. Used a prototype TENS device with a matrix electrode array.                                                                                                                                                                                                                                                                                                                                                                                                                                                                              |
| Kolu et al., 2018 <sup>81</sup>     | Unable to isolate TENS effects                                                                                                                               | Evaluated transcutaneous nerve stimulation combined with high-intensity laser therapy and ultrasound treatment in patients with chronic lumbar radiculopathy. Not possible to isolate TENS                                                                                                                                                                                                                                                                                                                                                                                                                           |
| Koo et al., 2015 <sup>82</sup>      | Unable to isolate TENS effects                                                                                                                               | Evaluated Noxipoint Therapy to conventional physiotherapy that consisted of TENS, exercise, and manual and heat therapies for the treatment of chronic neck and shoulder. Noxipoint Therapy is a modified technique to deliver TENS over tender muscle points to produce a sore pain and does not meet our criteria for standard TENS and the comparator group included TENS combined with other treatments                                                                                                                                                                                                          |
| Kumar et al., 1997 <sup>83</sup>    | Not standard TENS – H-wave therapy                                                                                                                           | Evaluated transcutaneous electrostimulation for chronic painful peripheral neuropathy. The authors state “Electrotherapy was given by a portable, rechargeable unit, the H-Wave machine (Electronic Waveform Lab, Huntington Beach, CA), which has output parameters that are distinct from the other available transcutaneous electrical nerve stimulation (TENS) modalities.” P 1703 Current is biphasic, exponentially decaying waveform with pulse widths of 4 ms and ≤35 V The electric current strength varies with voltage setup to a maximum of 35 mA, and the pulse frequency is user adjustable (2-70 Hz). |
| Kumar et al., 1998 <sup>84</sup>    | Not standard TENS - H-wave therapy                                                                                                                           | Evaluated transcutaneous electrostimulation for chronic painful peripheral neuropathy using H-Wave device with parameters distinct from standard TENS.                                                                                                                                                                                                                                                                                                                                                                                                                                                               |
| Labrunee et al., 2015 <sup>85</sup> | No pain outcomes                                                                                                                                             | Evaluated randomized placebo control study to determine whether applying TENS before exercise in PAD patients could delay onset of pain and lead to longer walking distances                                                                                                                                                                                                                                                                                                                                                                                                                                         |
| Lan et al., 2012 <sup>86</sup>      | TENS delivered to acupuncture points distant to pain                                                                                                         | Evaluated TENS on six acupuncture points for pain after total hip arthroplasty for elderly patients. Acupuncture points were generally distant to the site of pain (bilateral P6 on anterior surface of the forearm; L14 on dorsum of hand; ipsilateral to the surgery ST36 anterior crest of the tibia; GB31 between greater trochanter of femur and hiatus of sacrum).                                                                                                                                                                                                                                             |
| Lanham et al., 1984 <sup>87</sup>   | Not an RCT                                                                                                                                                   | Evaluated TENS combined with hypothermia in podiatric surgery by describing a series of 69 patients that received treatment. There was no comparison group                                                                                                                                                                                                                                                                                                                                                                                                                                                           |
| Lee et al., 1997 <sup>88</sup>      | Not standard TENS - medium frequency AC plus galvanic                                                                                                        | Evaluated electrical stimulation for pain associated with myofascial trigger points. The type of current was a combination of medium-frequency AC current and Galvanic current at a frequency of 50-100Hz Not standard TENS - combination of medium frequency AC plus galvanic                                                                                                                                                                                                                                                                                                                                       |
| Lee et al., 2015 <sup>89</sup>      | Unable to isolate TENS effects                                                                                                                               | Evaluated effect of a device combining high-frequency transcutaneous electrical nerve stimulation and thermotherapy (I-Rune I-200L, Midirune Co.) for primary dysmenorrhea. Not possible to isolate TENS because TENS and thermal therapies combined                                                                                                                                                                                                                                                                                                                                                                 |
| Lehmann et al., 1983 <sup>90</sup>  | Not standard TENS characteristics – delivered below sensory detection threshold (subthreshold TENS – reporting data from same sample as Lehmann et al., 1986 | Evaluated subthreshold TENS versus placebo TENS and electroacupuncture for chronic low back pain. Analysis of nonorganic findings.                                                                                                                                                                                                                                                                                                                                                                                                                                                                                   |
| Lehmann et al., 1986 <sup>91</sup>  | Not standard TENS characteristics – delivered below sensory detection threshold (subthreshold TENS – probably reporting same data as Lehmann et al., 1983    | Evaluated subthreshold TENS versus placebo TENS and electroacupuncture for chronic low back pain. Analysis of efficacy.                                                                                                                                                                                                                                                                                                                                                                                                                                                                                              |

10\_OL-TABLE3\_ExcludedStudies

| Reference                                          | Reason for exclusion                                                                                          | Description of study                                                                                                                                                                                                                                                                                                                                                                                                                                                                                                                                                                                                                                         |
|----------------------------------------------------|---------------------------------------------------------------------------------------------------------------|--------------------------------------------------------------------------------------------------------------------------------------------------------------------------------------------------------------------------------------------------------------------------------------------------------------------------------------------------------------------------------------------------------------------------------------------------------------------------------------------------------------------------------------------------------------------------------------------------------------------------------------------------------------|
| Lerma et al., 2020 <sup>92</sup>                   | Not full report – Abstract of conference poster                                                               | Evaluated TENS for pain control during first-trimester abortion.                                                                                                                                                                                                                                                                                                                                                                                                                                                                                                                                                                                             |
| Li et al., 2019 <sup>93</sup>                      | Not standard TENS - TEAS                                                                                      | Explored effect and mechanisms of TEA on postoperative recovery after caesarean section                                                                                                                                                                                                                                                                                                                                                                                                                                                                                                                                                                      |
| Lin et al., 2017 <sup>94</sup>                     | Not standard TENS – TEAS delivered to acupuncture points                                                      | Evaluated regulatory effects of acupoint electric stimulation on the analgesic substances and the relevant indices of nerve-immunity-endocrine system in the patients undergoing general anaesthesia anorectal operation                                                                                                                                                                                                                                                                                                                                                                                                                                     |
| Liu et al., 2015 <sup>95</sup>                     | Not standard TENS - transcutaneous electric acupoint stimulation                                              | Evaluated transcutaneous electrical acupuncture stimulation combined with sufentanil anaesthesia for intraoperative and postoperative supratentorial craniotomy. Electrodes applied at five pairs of acupuncture points: Hegu (LI4) and Waiguan (TE5), Jinmen (BL63) and Taichong (LR3), Zusanli (ST36) and Qiuxu (GB 40), and Fengchi (GB20) with Tianzhu (BL10) and Cuanzhu (BL2) with Yuyao (EX-HN4) on the craniotomy side and currents delivered using a Han's acupoint nerve stimulator (LH202H, Beijing Huawei Co, Ltd, Beijing, China) with a dense-disperse frequency of 2/100 Hz (alternated once every 3 s; 0.6 ms at 2 Hz and 0.2 ms at 100 Hz). |
| Loeser et al., 1975 <sup>96</sup>                  | Not an RCT                                                                                                    | Evaluated TENS for various chronic pains. No comparison groups                                                                                                                                                                                                                                                                                                                                                                                                                                                                                                                                                                                               |
| Lone et al., 2003 <sup>97</sup>                    | Not an RCT                                                                                                    | Evaluated TENS for osteoarthritis of the knee. Authors state “ <i>The results of this non-randomised controlled single-blind continuous trial ...</i> ” p481                                                                                                                                                                                                                                                                                                                                                                                                                                                                                                 |
| Lorenzana et al., 1999 <sup>98</sup>               | TENS on remote acupuncture points                                                                             | Evaluated the efficacy of transcutaneous electrical nerve stimulation (TENS) versus lidocaine in the relief of episiotomy pain                                                                                                                                                                                                                                                                                                                                                                                                                                                                                                                               |
| Lv et al., 2018 <sup>99</sup>                      | Not standard TENS - transcutaneous electric acupoint stimulation                                              | Evaluated transcutaneous acupoint electrical stimulation combined with sufentanil pre-treatment on incidence and severity of etomidate-induced myoclonus delivered bilaterally, at hegu and waiguan acupoints (on arm) using to 2/100Hz “dilational waves”. Acupoint not covering painful site                                                                                                                                                                                                                                                                                                                                                               |
| Macdonald and Coates, 1995 <sup>100</sup>          | Not standard TENS - transcutaneous spinal electroanalgesia and TENS control group not applied at site of pain | Evaluated Transcutaneous Spinal Electroanalgesia for Chronic Pain. Used TENS as a control for comparison but stated “Normally one would not apply TENS to these locations” p656                                                                                                                                                                                                                                                                                                                                                                                                                                                                              |
| Malmir et al., 2017 <sup>101</sup>                 | Not clinical pain - sample of pain-free participants                                                          | Evaluated TENS on experimentally induced delayed onset muscle soreness in Amateur Athletes                                                                                                                                                                                                                                                                                                                                                                                                                                                                                                                                                                   |
| Maria Fernandez-Seguín et al., 2019 <sup>102</sup> | Not TENS                                                                                                      | Evaluated radiological changes after combining static stretching and transcutaneous electrical stimulation of the plantar fascia in adults with idiopathic cavus foot                                                                                                                                                                                                                                                                                                                                                                                                                                                                                        |
| Matsuse et al., 2020 <sup>103</sup>                | No pain outcomes - Not treating pain                                                                          | Evaluated effectiveness of a hybrid training system with walking that simultaneously applies electrical stimulation to the knee extensors/flexors during walking in obese women with knee pain                                                                                                                                                                                                                                                                                                                                                                                                                                                               |
| McGough et al., 2019 <sup>104</sup>                | No pain outcomes - Not pain                                                                                   | Evaluated efficacy and safety of TNS for Attention-Deficit/Hyperactivity Disorder and potential changes in brain spectral power using resting state quantitative electroencephalography                                                                                                                                                                                                                                                                                                                                                                                                                                                                      |
| Meade et al., 2010 <sup>105</sup>                  | Not standard TENS - transcutaneous electric acupoint stimulation                                              | Evaluated transcutaneous electric acupoint stimulation as adjunctive treatment for opioid detoxification using a Han's Acupoint Nerve Stimulator to deliver currents to “hegu” and “neiguan” acupoints on dorsal and palmar surface of one hand, and dorsal and ventral surface of the other forearm. Frequency of stimulation alternated between 2 and 100 Hz at 3-second intervals. Primary outcome was opioid consumption although physical pain in past 24 hours assessed using the Brief Pain Inventory was a secondary outcome.                                                                                                                        |
| Meechan et al., 1998 <sup>106</sup>                | TENS administered internally – intra-oral                                                                     | Evaluated transcutaneous electronic nerve stimulation for discomfort associated with regional anaesthesia in dentistry using an injection-assist TENS machine (3M, St Paul, Minnesota, USA) with electrodes positioned in the mouth either side of the needle puncture point.                                                                                                                                                                                                                                                                                                                                                                                |
| Melzack et al., 1975 <sup>107</sup>                | Not standard TENS device and electrodes                                                                       | Evaluated TENS for various chronic pains using a Grass model S8 stimulator and EEG disc electrode to deliver currents                                                                                                                                                                                                                                                                                                                                                                                                                                                                                                                                        |
| Melzack et al., 1980 <sup>108</sup>                | Not an RCT - “Patients were assigned alternately, as they arrived at the clinic, to each order of treatment.” | Evaluated TENS versus ice massage in patients with chronic low back pain                                                                                                                                                                                                                                                                                                                                                                                                                                                                                                                                                                                     |
| Mi et al., 2018 <sup>109</sup>                     | Not standard TENS - transcutaneous electric acupoint stimulation                                              | Evaluated the effect of transcutaneous electrical acupoint stimulation (TEAS) on the quality of recovery during the early period after laparoscopic cholecystectomy and the dosage of anaesthetic and analgesic                                                                                                                                                                                                                                                                                                                                                                                                                                              |
| Miller Jones et al., 1980 <sup>110</sup>           | Not an RCT                                                                                                    | Evaluated TENS for labour Pain. Not prospective randomisation -patients were given TENS and followed. Then retrospectively they were compared with a sample taken from patients who had not received TENS - EXCLUDE AS NOT RANDOMISED                                                                                                                                                                                                                                                                                                                                                                                                                        |
| Monaco et al., 2013 <sup>111</sup>                 | No pain outcomes                                                                                              | Evaluated effect of TENS on electromyographic and kinesiological activity in patients with temporomandibular disorder. No pain outcomes                                                                                                                                                                                                                                                                                                                                                                                                                                                                                                                      |



10\_OL-TABLE3\_ExcludedStudies

| Reference                                  | Reason for exclusion                                                                                                           | Description of study                                                                                                                                                                                                                                                                                                                                                                                                                                                                                                                                                                                       |
|--------------------------------------------|--------------------------------------------------------------------------------------------------------------------------------|------------------------------------------------------------------------------------------------------------------------------------------------------------------------------------------------------------------------------------------------------------------------------------------------------------------------------------------------------------------------------------------------------------------------------------------------------------------------------------------------------------------------------------------------------------------------------------------------------------|
| Mucuk and Baser, 2014 <sup>112</sup>       | Not standard TENS - TENS-acupuncture pen                                                                                       | Evaluated non-invasive electroacupuncture on labour pain using a TENS-acupuncture pen with a maximum output of 0.6mA administered to acupuncture points LI4 (hand)SP6 (leg/foot)                                                                                                                                                                                                                                                                                                                                                                                                                           |
| Mummolo et al., 2019 <sup>113</sup>        | Not RCT – retrospective evaluation                                                                                             | Evaluated effects of ultra-low-frequency transcutaneous electrical nerve stimulation (ULF-TENS) on pain and electromyographic values in subjects affected by temporomandibular disorder                                                                                                                                                                                                                                                                                                                                                                                                                    |
| Murina et al., 2008 <sup>114</sup>         | TENS administered internally - intravaginal                                                                                    | Evaluated TENS to treat vestibulodynia using a dual channel portable TENS unit (YSY-EST device) and a commercially available plastic vaginal probe with two gold metallic transversal rings as electrodes (Periprobe VAG2ST Beac, Pavia, Italy) inserted 20 mm into the vagina                                                                                                                                                                                                                                                                                                                             |
| Murina et al., 2018 <sup>115</sup>         | TENS administered internally - intravaginal                                                                                    | Evaluated TENS plus diazepam to treat vestibulodynia using a dual channel portable TENS unit (NeuroTrac Continence; VerityMedical, London, UK) and a commercially available plastic vaginal probe with two gold metallic transversal rings (Periprobe VAG2ST Beac, Pavia, Italy) inserted 20 mm into the vagina                                                                                                                                                                                                                                                                                            |
| Mysliwiec et al., 2011 <sup>116</sup>      | No pain outcomes                                                                                                               | Evaluated effect of cervical traction and TENS on strength of painless grip                                                                                                                                                                                                                                                                                                                                                                                                                                                                                                                                |
| Naeser et al., 2002 <sup>117</sup>         | Not standard TENS – microcurrent electrical stimulation                                                                        | Evaluated carpal tunnel syndrome pain treated with low-level laser and microamperes transcutaneous electric nerve stimulation                                                                                                                                                                                                                                                                                                                                                                                                                                                                              |
| Nakano et al., 2019 <sup>118</sup>         | Not RCT                                                                                                                        | Evaluated effects of TENS on pain and other physical symptoms in 20 in-patients with advanced cancer receiving palliative care                                                                                                                                                                                                                                                                                                                                                                                                                                                                             |
| Ngai et al., 2010 <sup>119</sup>           | Not clinical pain                                                                                                              | Evaluated Acu-TENS on functional capacity and beta-endorphin level in subjects with chronic obstructive pulmonary disease                                                                                                                                                                                                                                                                                                                                                                                                                                                                                  |
| Noehren et al., 2015 <sup>120</sup>        | Protocol – ongoing study                                                                                                       | Protocol of an RCT to evaluate TENS for fibromyalgia: a double-blind randomized clinical trial. Full RCT published <b>after our search</b> Dailey et al., 2019 <i>Arthritis Rheumatol.</i> 2019 Nov 18. doi: 10.1002/art.41170.                                                                                                                                                                                                                                                                                                                                                                            |
| Nourbakhsh and Fearon, 2008 <sup>121</sup> | Not standard TENS device or electrodes                                                                                         | Evaluation of noxious level electrical stimulation on chronic lateral epicondylitis administered using a MRL Neuroprobe System V (CR Kesner Company, Geneva, IL, USA) as painful stimulation of trigger points for 30s using 4Hz interrupted DC current and a probe electrode                                                                                                                                                                                                                                                                                                                              |
| Okonkwo et al., 2018 <sup>122</sup>        | Not an RCT                                                                                                                     | Evaluation of TENS for post-injection sciatic pain in a non-randomized controlled clinical trial.                                                                                                                                                                                                                                                                                                                                                                                                                                                                                                          |
| Oyibo et al., 2004 <sup>123</sup>          | Not standard TENS - microcurrent electrical stimulation                                                                        | Evaluated electrical stimulation therapy through silver-plated nylon-Dacron™ stocking electrodes (Micro-Z, Prizm Medical, Duluth, GA, USA) for painful diabetic neuropathy. Pulsed electric current were delivered a subsensory dose approximately 50 micro amps at 80 pulses per second for the first 10 min, then 8 pulses per second for the next 10 min each hour over an 8-h period.                                                                                                                                                                                                                  |
| Ozen et al., 2019 <sup>124</sup>           | Cannot isolate TENS - hotpack, transcutaneous electrical nerve stimulation (TENS), and ultrasound                              | Evaluated effects of physiotherapy modalities with those of acupuncture on pain, daily function, and quality of life in FMS patients.                                                                                                                                                                                                                                                                                                                                                                                                                                                                      |
| Park et al., 2014 <sup>125</sup>           | No pain outcomes                                                                                                               | Evaluated TENS with exercise on spasticity, balance, and gait in patients with chronic stroke. No pain outcomes.                                                                                                                                                                                                                                                                                                                                                                                                                                                                                           |
| Patel et al., 2016 <sup>126</sup>          | Unable to isolate TENS effects                                                                                                 | Evaluated TENS with McKenzie method for lumbar radiculopathy. Not possible to isolate the effects of TENS from McKenzie                                                                                                                                                                                                                                                                                                                                                                                                                                                                                    |
| Peng et al., 2010 <sup>127</sup>           | Not an RCT                                                                                                                     | Evaluated TENS on Acupoints for labour pain. Stated a Non-randomized Controlled Study                                                                                                                                                                                                                                                                                                                                                                                                                                                                                                                      |
| Polat et al., 2017 <sup>128</sup>          | Not an RCT                                                                                                                     | Evaluated TENS combined with hot pack and home exercise program for osteoarthritis of the knee with and without neuropathic pain. <b>There was no comparison intervention</b>                                                                                                                                                                                                                                                                                                                                                                                                                              |
| Pope et al., 1994 <sup>129</sup>           | Not standard TENS - neuromuscular electrical stimulation                                                                       | Evaluated transcutaneous muscle stimulation for sub-acute low back pain using a Myocare PLUS device which is considered to be a neuromuscular stimulator and thus excluded. Note: Currents produced physiological stimulation that could be considered within the scope of ‘standard TENS’ Biphasic pulses 37pps pulse duration 225 us with pulse amplitude modulated (ramped up in 2 s held for 6s then ramped off in 2s ... then a pause before cycle repeated. 4 electrodes placed on back around pain and current delivered to maintain sensation as high as possible – no mention of muscle twitching |
| Pour et al., 2012 <sup>130</sup>           | TENS applied to acupuncture points away from painful area [TENS applied to acupuncture points on foot and SP6 for labour pain] | Evaluated effect of two methods of compressive medicine and electrical stimulation of the skin on the severity of labour pains in the first pregnant women.                                                                                                                                                                                                                                                                                                                                                                                                                                                |
| Quinton et al., 1987 <sup>131</sup>        | Some participants not adults                                                                                                   | Evaluated TENS in acute hand infections. Sample included at least one child under 16years of age (age range from 15 to 66 years).                                                                                                                                                                                                                                                                                                                                                                                                                                                                          |
| Radhakrishna et al., 2020 <sup>132</sup>   | TENS applied pre-emptive before general surgery and pain measured post operatively without TENS                                | Evaluated the effect of immediate preoperative TENS on intraoperative anaesthetic drug consumption in patients undergoing lumbar discectomy under general anaesthesia                                                                                                                                                                                                                                                                                                                                                                                                                                      |

10\_OL-TABLE3\_ExcludedStudies

| Reference                                       | Reason for exclusion                                                                                  | Description of study                                                                                                                                                                                                                                                                                                                                                                                                                                                                                                                                                                                                                                                                                                                                                                                                                                                                                                                                             |
|-------------------------------------------------|-------------------------------------------------------------------------------------------------------|------------------------------------------------------------------------------------------------------------------------------------------------------------------------------------------------------------------------------------------------------------------------------------------------------------------------------------------------------------------------------------------------------------------------------------------------------------------------------------------------------------------------------------------------------------------------------------------------------------------------------------------------------------------------------------------------------------------------------------------------------------------------------------------------------------------------------------------------------------------------------------------------------------------------------------------------------------------|
| Rapoport et al., 2019 <sup>133</sup>            | Not TENS - secondary report of Yartisky                                                               | Performed a post-hoc analysis on a subgroup of participants with migraine from a randomized, double-blind, parallel-group, sham-controlled, multicentre study                                                                                                                                                                                                                                                                                                                                                                                                                                                                                                                                                                                                                                                                                                                                                                                                    |
| Razavi and Jansen, 2004 <sup>134</sup>          | Not standard TENS - placebo TENS only                                                                 | Evaluated acupuncture and placebo TENS in addition to exercise in treatment of rotator cuff tendinitis. No active TENS intervention.                                                                                                                                                                                                                                                                                                                                                                                                                                                                                                                                                                                                                                                                                                                                                                                                                             |
| Reich et al., 1989 <sup>135</sup>               | Unable to isolate TENS effects                                                                        | Evaluated various non-invasive treatments for vascular and muscle contraction headache including an 'Electrical Group' that received either traditional TENS or electrical neurotransmitter modulation, either singly or in combination. Data was analysed at group rather than modality level.                                                                                                                                                                                                                                                                                                                                                                                                                                                                                                                                                                                                                                                                  |
| Reichstein et al., 2005 <sup>136</sup>          | Not standard TENS – H wave characteristics delivered using a CEFAR Dumo TENS device                   | Evaluated effects of high-frequency external muscle stimulation (HF) with those of TENS in patients with diabetic distal symmetrical sensory polyneuropathy.                                                                                                                                                                                                                                                                                                                                                                                                                                                                                                                                                                                                                                                                                                                                                                                                     |
| Rodriguez-Fernandez et al., 2011 <sup>137</sup> | Not clinical pain - sample of pain-free participants                                                  | Evaluated burst-type TENS on cervical range of motion and latent myofascial trigger point sensitivity in a sample of individuals recruited from a pain-free population with at least 1 latent myofascial trigger point in their upper trapezius. Sample not recruited from clinical pain population.                                                                                                                                                                                                                                                                                                                                                                                                                                                                                                                                                                                                                                                             |
| Rooney et al., 1986 <sup>138</sup>              | No pain outcomes                                                                                      | Evaluated cryoanalgesia and TENS on pulmonary function tests post thoracotomy. No pain outcome                                                                                                                                                                                                                                                                                                                                                                                                                                                                                                                                                                                                                                                                                                                                                                                                                                                                   |
| Roth and Thrash, 1986 <sup>139</sup>            | Not standard TENS - microampere currents, and not standard electrodes and invasive technique          | Evaluated TENS for pain associated with orthodontic tooth movement. In one group TENS was applied externally over zygomatic arches using sponge pad electrodes – not standard TENS electrodes (0.5 Hz with an intensity of 500 mA). In one group TENS was applied internally (intraoral) directly to teeth using one probe electrode on the crown of each tooth and the other electrode on the palatal mucosa adjacent to the tooth (0.5 Hz, intensity of 50 mA) – Internal Currents were delivered using Alpha-Stim model 2000 which produces a biphasic waveform with varying pulse widths in the millisecond range and intensities in the microampere range (i.e. microcurrent). It is probable that 500mA and 50mA were typographical errors that should read 500 microampere and 50 microamperes. "Both groups were told that the intensity of the current was so small that the most they would feel was a very slight tingling, if anything at all." p133 |
| Santiesteban et al., 1985 <sup>140</sup>        | TENS delivered to acupuncture points distant to pain                                                  | Evaluated TENS on acupuncture points for primary spasmodic dysmenorrhea using a MRL pain control system (5Hz, 250us, intensity to patient tolerance). Acupuncture points were not covering painful site (GB34, Sp6, (leg).                                                                                                                                                                                                                                                                                                                                                                                                                                                                                                                                                                                                                                                                                                                                       |
| Sari et al., 2019 <sup>141</sup>                | Unable to isolate TENS                                                                                | Evaluated intermittent pneumatic compression along with conventional treatment with cold pack treatment along with conventional treatment on clinical outcomes in patients with knee osteoarthritis                                                                                                                                                                                                                                                                                                                                                                                                                                                                                                                                                                                                                                                                                                                                                              |
| Schuster et al., 1980 <sup>142</sup>            | Not an RCT - 26 control patients were selected at random. Records were matched as closely as possible | Evaluated use of TENS and narcotic analgesics in relieving post-operative pain.                                                                                                                                                                                                                                                                                                                                                                                                                                                                                                                                                                                                                                                                                                                                                                                                                                                                                  |
| Schoenen et al., 2013 <sup>143</sup>            | Not standard TENS - supraorbital transcutaneous stimulator                                            | Evaluated trigeminal neurostimulation with a supraorbital transcutaneous stimulator (Cefaly, STX-Med., Herstal, Belgium) for migraine prevention. Neurostimulation delivered with one 30 mm 3x94 mm self-adhesive electrode on forehead and delivery of biphasic rectangular pulsed currents (250 µs, 60 Hz, 16 mA).                                                                                                                                                                                                                                                                                                                                                                                                                                                                                                                                                                                                                                             |
| Schomburg and Carter-Baker, 1983 <sup>144</sup> | Not an RCT                                                                                            | Evaluated TENS for post laparotomy pain compared with chart review to 75 patients who had undergone similar surgical procedures performed by the same surgeon before TENS postoperative pain management had been instituted.                                                                                                                                                                                                                                                                                                                                                                                                                                                                                                                                                                                                                                                                                                                                     |
| Selfe et al., 2008 <sup>145</sup>               | Not standard TENS - noninvasive interactive neurostimulation (InterX5000 device)                      | Evaluated Noninvasive Interactive Neurostimulation on Symptoms of Osteoarthritis of the Knee using an InterX5000 device (Neuro Resource Group, Plano, TX)                                                                                                                                                                                                                                                                                                                                                                                                                                                                                                                                                                                                                                                                                                                                                                                                        |
| Shirazi et al., 2014 <sup>146</sup>             | Not an RCT                                                                                            | Evaluated TENS on joint position sense in patients with knee joint osteoarthritis. Pre-post study without a comparison group.                                                                                                                                                                                                                                                                                                                                                                                                                                                                                                                                                                                                                                                                                                                                                                                                                                    |
| Silberstein et al., 2016 <sup>147</sup>         | Not standard TENS - 5KHz sine wave                                                                    | Evaluated non-invasive vagus nerve stimulation for chronic migraine headache prevention using low voltage 5KHz sine wave lasting 1 millisecond with such bursts repeated every 40 milliseconds (Electrocore Ltd)                                                                                                                                                                                                                                                                                                                                                                                                                                                                                                                                                                                                                                                                                                                                                 |
| Silberstein et al., 2016 <sup>148</sup>         | Not standard TENS - 5KHz sine wave                                                                    | Evaluated non-invasive vagus nerve stimulation for the acute cluster headache using low voltage 5KHz sine wave lasting 1 millisecond with such bursts repeated every 40 milliseconds (Electrocore Ltd)                                                                                                                                                                                                                                                                                                                                                                                                                                                                                                                                                                                                                                                                                                                                                           |
| Simon et al., 2015 <sup>149</sup>               | Not an RCT                                                                                            | Evaluated TENS for chronic axial low back pain on a single cohort stratified for age. Dose-response study with no other intervention comparison groups.                                                                                                                                                                                                                                                                                                                                                                                                                                                                                                                                                                                                                                                                                                                                                                                                          |
| Simpson and Ward, 2004 <sup>150</sup>           | Not standard TENS - transcutaneous spinal electroanalgesia                                            | Evaluated transcutaneous spinal electroanalgesia for pain from chronic critical limb ischemia. Transcutaneous spinal electroanalgesia uses two electrodes placed over dorsal spine and delivers currents that do not cause action potentials in peripheral nerves and no sensation of paraesthesia (4 us, 1800–2500 Hz, 100–300 V, Advanced Pain Management)                                                                                                                                                                                                                                                                                                                                                                                                                                                                                                                                                                                                     |



10\_OL-TABLE3\_ExcludedStudies

| Reference                                      | Reason for exclusion                                                      | Description of study                                                                                                                                                                                                                                                                                                                                                                                                                                                                                        |
|------------------------------------------------|---------------------------------------------------------------------------|-------------------------------------------------------------------------------------------------------------------------------------------------------------------------------------------------------------------------------------------------------------------------------------------------------------------------------------------------------------------------------------------------------------------------------------------------------------------------------------------------------------|
| Solomon and Guglielmo, 1985 <sup>151</sup>     | Not standard TENS - microcurrent electrical stimulation                   | Evaluated TENS for headache using a device that "... differs from most other TENS equipment by its low amperage (maximum 4 milliamperes), high frequency (12,000 to 20,000 Hz rectified to monophasic wave form) and short pulse width (approximately 30 microsec)" p 12                                                                                                                                                                                                                                    |
| Solomon et al., 1989 <sup>152</sup>            | Not standard TENS - microcurrent electrical stimulation                   | Evaluated Cranial Electrotherapy in the Treatment of Tension Headache using "... extremely low level, high frequency current applied transcranially" – microcurrent p 445                                                                                                                                                                                                                                                                                                                                   |
| Sonde et al., 2000 <sup>153</sup>              | No pain outcomes                                                          | Evaluated TENS for post-stroke paretic arm on functional outcomes including spasticity and activities of daily function but not pain                                                                                                                                                                                                                                                                                                                                                                        |
| Stralka et al., 1998 <sup>154</sup>            | Not standard TENS - high voltage pulsed direct current                    | Evaluated high voltage pulsed direct current built into a wrist splint for hand and wrist pain                                                                                                                                                                                                                                                                                                                                                                                                              |
| Stratton and Smith, 1980 <sup>155</sup>        | No pain outcomes                                                          | Evaluated TENS for postoperative thoracotomy on ventilatory function including forced vital capacity but not pain                                                                                                                                                                                                                                                                                                                                                                                           |
| Strayhorn et al., 1983 <sup>156</sup>          | Not an RCT                                                                | Evaluated TENS on use of narcotic analgesics and occurrence of postoperative complications following gastric bypass surgery for control of obesity from chart review                                                                                                                                                                                                                                                                                                                                        |
| Sun et al., 2017 <sup>157</sup>                | Not standard TENS - transcutaneous electric acupoint stimulation          | Evaluated Perioperative Transcutaneous Electrical Acupoint Stimulation for Postoperative Pain Relief Following Laparoscopic Surgery using a HANS Acupoint Nerve Stimulator (HANS-200A, Nanjing Jisheng Medical Technology Company, Nanjing, China) delivering an alternating dense and disperse stimulation (2Hz (0.6 ms pulse width) alternated with 100 Hz stimulation (0.2 ms pulse width) every 3 seconds to maximum current tolerated but subnoxious) to Hegu (LI4) and Neiguan (P6) distant from pain |
| Sunshine et al., 1996 <sup>158</sup>           | Not standard TENS – microcurrent electrical stimulation                   | Evaluated microcurrent TENS and massage for fibromyalgia (Electroacroscope device)                                                                                                                                                                                                                                                                                                                                                                                                                          |
| Takla and Rezk-Allah, 2018 <sup>159</sup>      | Not standard TENS - combination therapy, unable to isolate effect of TENS | Evaluated simultaneous application of TENS and ultrasound phonophoresis on active myofascial trigger points as a combined therapy using an Intellect Advanced Combo therapy system (2752CC; Chattanooga DJO France SAS Industries; Mexico) device. Using an ultrasound treatment head as an electrode and not possible to isolate TENS - Combined therapy                                                                                                                                                   |
| Takla et al., 2018 <sup>160</sup>              | Not standard TENS - combination therapy, unable to isolate effect of TENS | Evaluated low-frequency high-intensity versus medium-frequency low-intensity TENS delivered as combined therapy with ultrasound phonophoresis for management of active myofascial trigger points using an Intellect Advanced Combo therapy system (2752CC; Chattanooga DJO France SAS Industries; Mexico) device. Using an ultrasound treatment head as an electrode and not possible to isolate TENS - Combined therapy                                                                                    |
| Thiese et al., 2013 <sup>161</sup>             | Not an RCT                                                                | Evaluated electrical stimulation for chronic non-specific low back pain in a working-age population – Report of a Protocol                                                                                                                                                                                                                                                                                                                                                                                  |
| Thompson et al., 2008 <sup>162</sup>           | Not standard TENS - transcutaneous spinal electroanalgesia                | Evaluated transcutaneous spinal electroanalgesia (TSE) on low back pain. "...TSE bears a superficial resemblance to transcutaneous electrical nerve stimulation (TENS) but differs in that it is applied to the skin overlying the vertebral spine and uses stimulation frequencies far higher (2500+ Hz) than those used for TENS (circa 1–150 Hz).... The pulse widths used for the two systems are also substantially different (4 ls for TSE compared with 50–200 ls for TENS)."                        |
| Tok et al., 2011 <sup>163</sup>                | Unable to isolate TENS effects                                            | Evaluated electrical stimulation combined with continuous passive motion on symptoms, functional capacity, quality of life and balance in knee osteoarthritis. Combination therapy not possible to isolate contribution of TENS.                                                                                                                                                                                                                                                                            |
| Tousignant-Lafamme et al., 2017 <sup>164</sup> | Not an RCT - only one intervention                                        | Evaluated acupuncture-like TENS for chronic low back pain. Design was a randomized, crossover study to determine the duration of analgesia following 15- and 30-minute treatment. No comparison intervention group.                                                                                                                                                                                                                                                                                         |
| Tu et al., 2019 <sup>165</sup>                 | TENS delivered to acupuncture points distant to pain                      | Evaluated transcutaneous electrical acupoint stimulation on postoperative analgesia after ureteroscopy delivered to bilateral Shenyu (BL23) outside spinous process of L2 and SP9 between posterior tibia border and gastrocnemius muscle using a HANS LH-202 electrical stimulator.                                                                                                                                                                                                                        |
| Vance et al., 2018 <sup>166</sup>              | Not an RCT                                                                | Development of a method to maximize intensity of TENS used for fibromyalgia by analysing baseline data from an ongoing clinical RCT investigating the effects of TENS in women with fibromyalgia – the Fibromyalgia Activity Study with TENS (FAST; NCT01888640).                                                                                                                                                                                                                                           |
| VanderArk and McGrath, 1975 <sup>167</sup>     | Some participants not adults                                              | Evaluated TENS for post-operative pain. Some participants were not adults (13 years to 87 years).                                                                                                                                                                                                                                                                                                                                                                                                           |
| Vincenti et al., 1982 <sup>168</sup>           | Not an RCT                                                                | Evaluated TENS for labour pain.                                                                                                                                                                                                                                                                                                                                                                                                                                                                             |
| Vinterberg et al. 1978 <sup>169</sup>          | Not an RCT                                                                | Evaluated TENS for rheumatoid arthritis.                                                                                                                                                                                                                                                                                                                                                                                                                                                                    |

10\_OL-TABLE3\_ExcludedStudies

| Reference                                      | Reason for exclusion                                                               | Description of study                                                                                                                                                                                                                                                                                                                                                                       |
|------------------------------------------------|------------------------------------------------------------------------------------|--------------------------------------------------------------------------------------------------------------------------------------------------------------------------------------------------------------------------------------------------------------------------------------------------------------------------------------------------------------------------------------------|
| Wang et al., 1988 <sup>170</sup>               | Some participants not adults                                                       | Evaluated TENS for sickle cell pain crises. Some participants were not adults (12years to 27 years)                                                                                                                                                                                                                                                                                        |
| Wang, 1997 <sup>171</sup>                      | Not standard TENS - transcutaneous electric acupoint stimulation                   | Evaluated transcutaneous electrical acupoint stimulation on analgesic consumption post operation lower abdomen surgery at acupuncture points (Hegu (LI14) and either side of the incision site) using dense-disperse current.                                                                                                                                                              |
| Wang et al., 2007 <sup>172</sup>               | Not standard TENS - acupuncture acupoint stimulator                                | Evaluated TENS applied to acupoints for labour pain using an acupuncture acupoint stimulator (G-6502-2A). Acupuncture points LI4 PC6 SP6 LR3 not at site of pain.                                                                                                                                                                                                                          |
| Wang et al., 2007 <sup>173</sup>               | TENS delivered to acupuncture points distant to pain                               | Evaluated abdominal acupuncture TENS on leg shoulder loin and neck pain using acupuncture points that are distant from pain LI4 PC6 SP6 LR3 – in Chinese Excluded based on abstract.                                                                                                                                                                                                       |
| Wang et al., 2007 <sup>174</sup>               | Not standard TENS - 'pen shaped' electrodes                                        | Evaluated acupuncture-like electrical stimulation on chronic tension-type headache using a 'pen shaped' electrode with a tip diameter of 1mm delivering dense-and-disperse currents (TAO, MibiTech ApS, Helsingør, Denmark) to six acupoints distant to the pain , bilateral EX-HN5, GB 20, LI 4                                                                                           |
| Wang et al., 2008 <sup>175</sup>               | Not standard TENS - transcutaneous electric acupoint stimulation                   | Evaluated pre and during surgery TEAS on blood bioactive compounds involving cerebral injury during craniotomy at LI4, LI11 ST36 SP6 distant to pain not at site of pain. No pain measure in Chinese Excluded based on abstract.                                                                                                                                                           |
| Wang et al., 2009 <sup>176</sup>               | Not standard TENS - transcutaneous electric acupoint stimulation                   | Wang, Z. X. (2009) Clinical observation on electroacupuncture at acupoints for treatment of senile radical sciatica. [Chinese]. Zhongguo zhen jiu = Chinese acupuncture & moxibustion 29 (2), 126-128.                                                                                                                                                                                     |
| Wang et al., 2014 <sup>177</sup>               | Not standard TENS - transcutaneous electric acupoint stimulation                   | Evaluated transcutaneous electric acupoint stimulation on intra-operative remifentanyl consumption and postoperative side-effects in patients undergoing sinusotomy delivered to Hegu (LI4), Neiguan (PC6), and Zusanli (ST36) a 6–9mA,2/10 Hz before anaesthesia.                                                                                                                         |
| Ward et al., 2009 <sup>178</sup>               | Not clinical pain - sample of pain-free participants                               | Evaluated A efficacy of medium frequency alternating current and TENS on healthy participants.                                                                                                                                                                                                                                                                                             |
| Wattrisse et al., 1993 <sup>179</sup>          | Not standard TENS - Limoges currents                                               | Evaluated effect of transcutaneous cranial electrical stimulation with Limoges currents – French. Excluded based on abstract.                                                                                                                                                                                                                                                              |
| Weng et al., 2005 <sup>180</sup>               | Not standard TENS - 5KHz currents modulated at lower frequencies                   | Evaluated modulated-frequency mode of AL-TENS on tennis elbow pain. "... treated with either 5 KHz modulated by 2 Hz frequency mode (LF group), 5 KHz modulated by 100 Hz frequency mode of TENS (HF group) on acupuncture points (LI10 and LI11)". Output characteristics seems to be a carrier wave of 5KHz modulated at 2Hz or 100Hz.                                                   |
| Whitehair et al., 2019 <sup>181</sup>          | Not TENS                                                                           | Evaluated acute effects of TENS, transcutaneous neuromuscular electrical stimulation and no stimulation on pain-free passive range of motion of the shoulder in subjects with hemiplegic shoulder pain                                                                                                                                                                                     |
| Wieselmann-Penkner et al., 2001 <sup>182</sup> | No pain outcomes                                                                   | Evaluated TENS and EMG-biofeedback on muscular relaxation in bruxism.                                                                                                                                                                                                                                                                                                                      |
| Williams et al., 2019 <sup>183</sup>           | Not TENS Not RCT - healthy humans                                                  | Evaluated conditioned pain modulation efficiency in persons with and without migraine headaches                                                                                                                                                                                                                                                                                            |
| Williams 2019 <sup>184</sup>                   | Not RCT - Abstract                                                                 | Evaluated feasibility of TENS as adjunctive treatment for post-operative orthopaedic pain.                                                                                                                                                                                                                                                                                                 |
| Wilson and Stanczak, 2020 <sup>185</sup>       | Not an RCT - Review                                                                | Round-up of the current body of evidence of using TENS for pain control in patients with advanced cancer and palliative pain.                                                                                                                                                                                                                                                              |
| Wong et al., 2003 <sup>186</sup>               | Not standard TENS - Codetron                                                       | Evaluated acupuncture-like TENS for radiation-induced xerostomia associated with radical radiotherapy using Codetron device that delivers electrical currents randomly between 6 electrodes. Report of phase 1 of the RCT trial. Not an RCT                                                                                                                                                |
| Wong et al., 2012 <sup>187</sup>               | Not standard TENS - Codetron                                                       | Evaluated acupuncture-like TENS for radiation-induced xerostomia associated with radical radiotherapy using Codetron device. "... This particular TENS device ...differs from conventional TENS units, because it embeds a random circuit that enables random switching among 6 electrodes to prevent brain habituation to continuous stimulation" page 4245. Report of phase 2 of the RCT |
| Wu et al., 2012 <sup>188</sup>                 | Not standard TENS - middle frequency electrical stimulation                        | Evaluation of middle frequency electrical stimulation for dysmenorrhea. Currents delivered at frequency of 1000 -10,0000 Hz to acupuncture points not covering pain site (LI4 SP6) using a GM390TE, GEMORE device                                                                                                                                                                          |
| Xu et al., 2014 <sup>189</sup>                 | Cannot isolate TENS because all groups received identical TENS as combined therapy | Evaluated TENS in combination with cobalamin injection for postherpetic neuralgia.                                                                                                                                                                                                                                                                                                         |
| Xie et al., 2017 <sup>190</sup>                | Not standard TENS - transcutaneous electric acupoint stimulation                   | Evaluated transcutaneous electrical acupoint stimulation combined with palonosetron on chemotherapy-induced nausea and vomiting. No pain outcomes.                                                                                                                                                                                                                                         |
| Yang et al., 2017 <sup>191</sup>               | Not an RCT                                                                         | Evaluated acupuncture like TENS on knee osteoarthritis (KOA) with low pain. Single intervention group divided according to low and high pain                                                                                                                                                                                                                                               |

10\_OL-TABLE3\_ExcludedStudies

| Reference                             | Reason for exclusion                                                             | Description of study                                                                                                                                                                                                                                                                                                                                                                                                                                                                                                    |
|---------------------------------------|----------------------------------------------------------------------------------|-------------------------------------------------------------------------------------------------------------------------------------------------------------------------------------------------------------------------------------------------------------------------------------------------------------------------------------------------------------------------------------------------------------------------------------------------------------------------------------------------------------------------|
| Yang et al., 2017 <sup>192</sup>      | Not clinical pain - slow-transit constipation                                    | Evaluated transcutaneous electrical stimulation in women with slow-transit constipation. Primary purpose of study was to evaluate slow-transit constipation and associated symptoms of constipation, including abdominal pain as a secondary outcome. Target sample was women with slow-transit constipation rather than patients with clinical pain.                                                                                                                                                                   |
| Yao et al., 2015 <sup>193</sup>       | Not standard TENS - transcutaneous electric acupoint stimulation                 | Evaluated transcutaneous electric acupoint stimulation on quality of recovery and postoperative analgesia after gynaecological laparoscopic surgery to Hegu (LI4), Neiguan (PC6), Zusanli (ST36), and Sanyinjiao (SP6) acupoints distant from pain using a Hans electronic acupuncture apparatus (dense-disperse frequency (2/10 Hz), 6–9mA, HANS-100B, Nanjing Jisheng Medical Technology Company, Nanjing, China).                                                                                                    |
| Yarnitsky et al., 2017 <sup>194</sup> | Not standard TENS - Remote Electrical Neuromodulation                            | Evaluated remote nonpainful electrical upper arm skin stimulation for reducing migraine attack pain. Remote Electrical Neuromodulation uses the principles of conditioned pain modulation applying high intensity TENS to the arm for migraine. Authors argue that REN on arm has neural relationship to migraine pain - we exclude because authors do not call this technique TENS, location of electrodes are remote, and currents delivered using parameters to simulate elicit conditioned pain modulation systems. |
| Yarnitsky et al., 2019 <sup>195</sup> | Not standard TENS and not at site of pain ... much debate in team on this though | Evaluated efficacy and safety of a remote electrical neuromodulation (REN) device for the acute treatment of migraine.                                                                                                                                                                                                                                                                                                                                                                                                  |
| Yeh et al., 2010 <sup>196</sup>       | Not standard TENS - transcutaneous electric acupoint stimulation                 | Evaluated transcutaneous acupoint electrical stimulation for postoperative pain in patients with patient-controlled analgesia. TEAS delivered at acupoints distant from pain, BL40, GB34, HT7, P6                                                                                                                                                                                                                                                                                                                       |
| Yeh et al., 2018 <sup>197</sup>       | Not standard TENS - transcutaneous electric acupoint stimulation                 | Evaluated transcutaneous acupoint electrical stimulation on post-hemorrhoidectomy-associated pain, anxiety, and heart rate variability at acupoints distant from pain, <i>chengshan</i> (BL57) and <i>erbai</i> (EX-UE2) and a stimulator (D0205KL, Ching-Ming Co., Taiwan) delivering dense disperse currents                                                                                                                                                                                                          |
| Yilmaz et al., 2020 <sup>198</sup>    | Not possible to isolate the effects of TENS - "a combination of US, TENS"        | Evaluated high-intensity laser therapy (HILT) and a combination of transcutaneous nerve stimulation (TENS) and ultrasound (US) treatment on pain, range of motion (ROM) and functional activity on cervical pain associated with cervical disc herniation (CDH).                                                                                                                                                                                                                                                        |
| Yip et al., 2007 <sup>199</sup>       | Unable to isolate TENS effects                                                   | Evaluated combined transcutaneous acupoint electrical stimulation and electromagnetic millimetre waves for spinal pain. Not possible to isolate TENS                                                                                                                                                                                                                                                                                                                                                                    |
| Yousef et al., 2015 <sup>200</sup>    | Not standard TENS - posterior tibial nerve stimulation                           | Evaluated transcutaneous electrical posterior tibial nerve stimulation versus lateral internal sphincterotomy for treatment of chronic anal fissure. Transcutaneous electrical nerve stimulation of posterior tibial nerve is used for faecal and urinary incontinence and was applied using an Endomed 182 device (Enraf Nonius, Holland) with the negative contact electrode on the ankle skin behind the medial malleolus, and the positive electrode, 10 cm above the negative electrode.                           |
| Yu et al., 2019 <sup>201</sup>        | Not standard TENS - TEAS                                                         | Evaluated TEAS on early recovery in patients undergoing gynaecological laparoscopic surgery.                                                                                                                                                                                                                                                                                                                                                                                                                            |
| Zeb et al., 2019 <sup>202</sup>       | Not RCT                                                                          | Evaluated effectiveness TENS in management of neuropathic pain in post-traumatic incomplete spinal cord injury patients.                                                                                                                                                                                                                                                                                                                                                                                                |
| Zhan and Tian 2019 <sup>203</sup>     | Not standard TENS - TEAS                                                         | Evaluated effect and adverse effects of transverse abdominis plane block and TEAS on postoperative outcomes.                                                                                                                                                                                                                                                                                                                                                                                                            |
| Zhang et al., 2014 <sup>204</sup>     | Not standard TENS - transcutaneous electric acupoint stimulation                 | Evaluated pre-treatment with transcutaneous electrical acupoint stimulation on the quality of recovery after ambulatory breast surgery. Transcutaneous electrical acupoint stimulation was delivered at acupoints distant from pain LI4, PC4, ST36 (hand and arm) using a TEAS - SDZ-V dense and disperse device.                                                                                                                                                                                                       |
| Zhang et al., 2016 <sup>205</sup>     | Not standard TENS - transcutaneous electric acupoint stimulation                 | Evaluated TEAS before the anaesthesia induction on opioids consumption in patients undergoing off-pump coronary artery bypass grafting at distal-proximal acupoints combination (LI4 and CV17) and regional acupoints combination (CV17 and CV14) using a <i>Hwato</i> electronic acupuncture treatment instrument (model No. SDZ-V, Suzhou Medical Appliances Co., Ltd, Suzhou, China). - - InJClinExpMed 9(12)                                                                                                        |
| Zhang et al., 2017 <sup>206</sup>     | TENS delivered to body sites distant to pain                                     | Evaluated TENS of foot for postoperative bladder spasms and pain. Stimulation not on pain site                                                                                                                                                                                                                                                                                                                                                                                                                          |
| Zhang et al., 2020 <sup>207</sup>     | E - Not pain                                                                     | Evaluated effect of transcutaneous electrical stimulation treatment in combination with intraoperative nerve staining on sexual function after radical surgery.                                                                                                                                                                                                                                                                                                                                                         |
| Zhao et al., 2015 <sup>208</sup>      | Not standard TENS - transcutaneous electric acupoint stimulation                 | Evaluated transcutaneous electrical acupoint stimulation for spasticity following Brain Injury using an acupoint nerve electrical stimulator (HANS-100A, Nanjing Gensun medical technology company, Nanjing, China) at Hegu (LI4)–Yuji (LU10) and Zusanli (ST36)–Chengshan (BL57). Pain on Disability Assessment Scale was a secondary outcome.                                                                                                                                                                         |
| Zhou et al., 2018 <sup>209</sup>      | Not standard TENS - transcutaneous electric acupoint stimulation                 | Evaluated Transcutaneous Electrical Acupoint Stimulation for gastrointestinal dysfunction after caesarean section SP6 and ST36 acupoints using a <i>Hwato</i> electric acupuncture treatment instrument (model No. SDZV; Suzhou Medical Appliances Co. Ltd, Suzhou, China) with a dilatational wave of 2/10 Hz (2-second cycle) for 30 min. TEAS delivered at acupoints distant from pain.                                                                                                                              |

10\_OL-TABLE3\_ExcludedStudies

| Reference                 | Reason for exclusion                                    | Description of study                                                                                                                                                                                                                           |
|---------------------------|---------------------------------------------------------|------------------------------------------------------------------------------------------------------------------------------------------------------------------------------------------------------------------------------------------------|
| Zizic et al., 1995<br>210 | Not standard TENS – microcurrent electrical stimulation | Evaluated pulsed electrical stimulation for osteoarthritis of the knee using low voltage (mean = 6.2V peak volts). Characteristics like those of microcurrent electrical stimulation although no overt statement to this effect in the report. |

**REFERENCES – EXCLUDED STUDIES WITH REASONS\***

\*Note: Reference numbering in this list relates only to studies cited in this table

1. Aguilar Ferrandiz ME, Nijs J, Gidron Y, et al. Auto-Targeted Neurostimulation Is Not Superior to Placebo in Chronic Low Back Pain: A Fourfold Blind Randomized Clinical Trial. *Pain physician* 2016; **19**(5): E707-19.
2. Albayrak I, Apiliogullari S, Dal CN, Levendoglu F, Ozerbil OM. Efficacy of Pulsed Radiofrequency Therapy to Dorsal Root Ganglion Adding to TENS and Exercise for Persistent Pain after Total Knee Arthroplasty. *Journal of Knee Surgery* 2017; **30**(2): 134-42.
3. Alhusaini AA, Fallatah S, Melam GR, Buragadda S. Efficacy of transcutaneous electrical nerve stimulation combined with therapeutic exercise on hand function in children with hemiplegic cerebral palsy. *Somatosensory & motor research* 2019; **36**(1): 49-55.
4. Altas EU, Demirdal U. The effect of physical therapy and rehabilitation modalities on sleep quality in patients with primary knee osteoarthritis: A single-blind, prospective, randomized-controlled study. *Turkish journal of physical medicine and rehabilitation* 2020; **66**(1): 73-83.
5. Al Zamil M, Kulikova N, Bezrukova O, Volkova I, Stahurlova V. Comparative analysis between transcutaneous electroneurostimulation and acupuncture in treatment of carpal tunnel syndrome. *European Journal of Neurology* 2019; **26**: 729.
6. Askin A, Savas S, Koyuncuoglu HR, Baloglu HH, Inci MF. Low dose high frequency ultrasound therapy for stellate ganglion blockade in complex regional pain syndrome type I: a randomised placebo controlled trial. *International Journal of Clinical and Experimental Medicine* 2014; **7**(12): 5603-11.
7. Atalay C, Yilmaz KB. The effect of transcutaneous electrical nerve stimulation on postmastectomy skin flap necrosis. *Breast cancer research and treatment* 2009; **117**(3): 611-4.
8. Augustinsson L, Bohlin P, Bundsen P, et al. Pain relief during delivery by transcutaneous electrical nerve stimulation. *Pain* 1977; **4**(1): 59-65.
9. Avramidis K, Strike PW, Taylor PN, Swain ID. Effectiveness of electric stimulation of the vastus medialis muscle in the rehabilitation of patients after total knee arthroplasty. *Archives of physical medicine and rehabilitation* 2003; **84**(12): 1850-3.
10. Aydin S, Arioğlu Aydin Ç, Batmaz G, Dansuk R. Effect of vaginal electrical stimulation on female sexual functions: a randomized study. *Journal of sexual medicine* 2015; **12**(2): 463-9.
11. Aydogan S, Er U, Ozlu O. Effectiveness of preemptive analgesia using a frequency rhythmic electrical modulation system in patients having instrumented fusion for lumbar stenosis. *Asian spine journal* 2014; **8**(2): 190-6.
12. Ayyildiz A, Nuhoglu B, Huri E, Huri M, Gurdal M, Germiyanoglu C. Transcutaneous electrical nerve stimulation (TENS): Decreased of pain when extracorporeal shock wave lithotripsy. [Turkish]. *Turk Uroloji Dergisi* 2004; **30**(4): 446-50.
13. Bai WY, Yang YC, Teng XF, Wan YX, Wei W, Zhu JC. Effects of Transcutaneous Electrical Acupoint Stimulation on the Stress Response During Extubation After General Anesthesia in Elderly Patients Undergoing Elective Supratentorial Craniotomy: a Prospective Randomized Controlled Trial. *Journal of neurosurgical anesthesiology* 2018; **30**(4): 337-46.
14. Behm DG, Colwell EM, Power GMJ, et al. Transcutaneous electrical nerve stimulation improves fatigue performance of the treated and contralateral knee extensors. *European journal of applied physiology* 2019; **119**(11-12): 2745-55.
15. Belmonte R, Tejero M, Ferrer M, et al. Efficacy of low-frequency low-intensity electrotherapy in the treatment of breast cancer-related lymphoedema: a cross-over randomized trial. *Clinical rehabilitation* 2012; **26**(7): 607-18.
16. Bouafif L, Ellouze N. Design and evaluation of a modulated TENS stimulation in medical pain therapy. *Current Signal Transduction Therapy* 2019; **14**(1): 75-83.
17. Bundsen P, Peterson L, Selstam U. Pain relief in labor by transcutaneous electrical nerve stimulation. A prospective matched study. *Acta obstetrica et gynecologica Scandinavica* 1981; **60**(5): 459-68.

## 10\_OL-TABLE3\_ExcludedStudies

18. Burch FX, Tarro JN, Greenberg JJ, Carroll WJ. Evaluating the benefits of patterned stimulation in the treatment of osteoarthritis of the knee: a multi-center, randomized, single-blind, controlled study with an independent masked evaluator. *Osteoarthritis and cartilage* 2008; **16**(8): 865-72.
19. Burssens P, Forsyth R, Steyaert A, van Ovost E, Praet M, Verdonk R. Influence of burst TENS stimulation on the healing of Achilles tendon suture in man. *Acta Orthopaedica Belgica* 2003 Dec;69(6):528-532 2003.
20. Carbonario F, Matsutani L, Yuan S, Marques A. Effectiveness of high-frequency transcutaneous electrical nerve stimulation at tender points as adjuvant therapy for patients with fibromyalgia. *European journal of physical and rehabilitation medicine* 2013; **49**(2): 197-204.
21. Chao A-S, Chao A, Wang T-H, et al. Pain relief by applying transcutaneous electrical nerve stimulation (TENS) on acupuncture points during the first stage of labor: A randomized double-blind placebo-controlled trial. *Pain* 2007; **127**(3): 214-20.
22. Chee EK, Walton H. Treatment of trigger points with microamperage transcutaneous electrical nerve stimulation (TENS)--(the Electro-Acuscope 80). *Journal of manipulative and physiological therapeutics* 1986; **9**(2): 131-4.
23. Cheing GL, Hui-Chan CW. Would the addition of TENS to exercise training produce better physical performance outcomes in people with knee osteoarthritis than either intervention alone? *Clinical rehabilitation* 2004; **18**(5): 487-97.
24. Chen WL, Hsu WC, Lin YJ, Hsieh LF. Comparison of intra-articular hyaluronic acid injections with transcutaneous electric nerve stimulation for the management of knee osteoarthritis: a randomized controlled trial. *Archives of physical medicine and rehabilitation* 2013; **94**(8): 1482-9.
25. Chen MY, Pu QQ, Liu SY, Jiang ZY. [Efficacy comparison of different stimulation therapies for peri-arthritis of shoulder]. *Zhongguo zhen jiu = Chinese acupuncture & moxibustion* 2013; **33**(2): 109-12.
26. Chen YQ, Wu WL, Yao YS, Yang Y, Zhao QY, Qiu LC. Transcutaneous electric acupoint stimulation at Jiaji points reduce abdominal pain after colonoscopy: a randomized controlled trial. *International Journal of Clinical and Experimental Medicine* 2015; **8**(4): 5972-7.
27. Chen YQ, Yao YS, Wu YH, Dai DS, Zhao QY, Qiu LC. Transcutaneous electric acupoint stimulation alleviates remifentanyl-induced hyperalgesia in patients undergoing thyroidectomy: a randomized controlled trial. *International Journal of Clinical and Experimental Medicine* 2015; **8**(4): 5781-7.
28. Chen YQ, Yang Y, Yao YS, Dai DS, Qian B, Liu PP. Does transcutaneous electric acupoint stimulation improve the quality of recovery after thyroidectomy? A prospective randomized controlled trial. *International Journal of Clinical and Experimental Medicine* 2015; **8**(8): 13622-7.
29. Chen J, Zhang Y, Li X, et al. Efficacy of transcutaneous electrical acupoint stimulation combined with general anesthesia for sedation and postoperative analgesia in minimally invasive lung cancer surgery: a randomized, double-blind, placebo-controlled trial. *Thoracic cancer* 2020.
30. Cheng RSS, Pomeranz B. Electrotherapy of chronic musculoskeletal pain: Comparison of electroacupuncture and acupuncture-like transcutaneous electrical nerve stimulation. *Clinical Journal of Pain* 1986; **2**(3): 143-9.
31. Chiu JH, Chen WS, Chen CH, et al. Effect of transcutaneous electrical nerve stimulation for pain relief on patients undergoing hemorrhoidectomy: prospective, randomized, controlled trial. *Diseases of the colon and rectum* 1999; **42**(2): 180-5.
32. Coletta R, Maggiolo F, Di Tizio S. Etofenamate and transcutaneous electrical nerve stimulation treatment of painful spinal syndromes. *International journal of clinical pharmacology research* 1988; **8**(4): 295-8.
33. Conn IG, Marshall AH, Yadav SN, Daly JC, Jaffer M. Transcutaneous electrical nerve stimulation following appendectomy: the placebo effect. *Annals of the Royal College of Surgeons of England* 1986; **68**(4): 191-2.
34. Cornell P, Lopez A, Malofsky H. Pain reduction with transcutaneous electrical nerve stimulation after foot surgery. *J Foot Surg* 1984; **23**(4): 326-33.
35. Demidas A, Zarzycki M. Touch and Pain Sensations in Diadynamic Current (DD) and Transcutaneous Electrical Nerve Stimulation (TENS): A Randomized Study. *Biomed Research International* 2019; **2019**: 9073073.
36. Duzyj CM, Simonds A, Jones I, Hill JM, Khan S, Parrott JS. 281: transcutaneous electrical nerve stimulation to reduce pain and opioid use after cesarean: a pilot study. *American journal of obstetrics and gynecology* 2020; **222**(1): S190-.
37. Dodick DW, Lipton RB, Goadsby PJ, et al. Predictors of Migraine Headache Recurrence: A Pooled Analysis From the Eletriptan Database. *Headache: The Journal of Head & Face Pain* 2008; **48**(2): 184-93.
38. Eidy M, Fazel MR, Janzamani M, Rezaei MH, Moravveji AR. Preemptive Analgesic Effects of Transcutaneous Electrical Nerve Stimulation (TENS) on Postoperative Pain: A Randomized, Double-Blind, Placebo-Controlled Trial. *Iranian Red Crescent Medical Journal* 2016; **18**(4).



## 10\_OL-TABLE3\_ExcludedStudies

39. Ertzgaard P, Alwin J, Sorbo A, Lindgren M, Sandsjo L. Evaluation of a self-administered transcutaneous electrical stimulation concept for the treatment of spasticity: a randomized placebo-controlled trial. *European journal of physical and rehabilitation medicine* 2018; **54**(4): 507-17.
40. Fagade OO, Obilade TO. Therapeutic effect of TENS on post-IMF trismus and pain. *African journal of medicine and medical sciences* 2003; **32**(4): 391-4.
41. Fargas-Babjak A, Rooney P, Gerecz E. Randomized trial of Codetron for pain control in osteoarthritis of the hip/knee. *Clinical journal of pain* 1989; **5**(2): 137-41.
42. Fargas-Babjak AM, Pomeranz B, Rooney PJ. Acupuncture-like stimulation with codetron for rehabilitation of patients with chronic pain syndrome and osteoarthritis. *Acupuncture & electro-therapeutics research* 1992; **17**(2): 95-105.
43. Fary RE, Carroll GJ, Briffa TG, Briffa NK. The effectiveness of pulsed electrical stimulation in the management of osteoarthritis of the knee: results of a double-blind, randomized, placebo-controlled, repeated-measures trial. *Arthritis Rheum* 2011; **63**(5): 1333-42.
44. Fletcher-Smith JC, Walker DM, Allatt K, et al. The ESCAPS study: a feasibility randomized controlled trial of early electrical stimulation to the wrist extensors and flexors to prevent post-stroke complications of pain and contractures in the paretic arm. *Clinical rehabilitation* 2019; **33**(12): 1919-30.
45. Gadsby JG, Franks A, Jarvis P, Dewhurst F. Acupuncture-like transcutaneous electrical nerve stimulation within palliative care: a pilot study. *Complementary therapies in medicine* 1997; **5**(1): 13-8.
46. Gao YQ, Jia Q, Xie S, et al. Clinical Trials for Thyroidectomy Under Acupuncture-aided Anesthesia by Using Electroacupuncture or Transcutaneous Acupoint Electrical Stimulation of Different Acupoints. *Zhen ci yan jiu = Acupuncture research* 2017; **42**(4): 332-7.
47. Garaud T, Gervais C, Szekely B, et al. Randomized study of the impact of a therapeutic education program on patients suffering from chronic low-back pain who are treated with transcutaneous electrical nerve stimulation. *Medicine* 2018; **97**(52): e13782-e.
48. Garland D, Holt P, Harrington JT, Caldwell J, Zizic T, Cholewczynski J. A 3-month, randomized, double-blind, placebo-controlled study to evaluate the safety and efficacy of a highly optimized, capacitively coupled, pulsed electrical stimulator in patients with osteoarthritis of the knee. *Osteoarthritis and cartilage* 2007; **15**(6): 630-7.
49. Gaul C, Diener HC, Silver N, et al. Non-invasive vagus nerve stimulation for PREvention and Acute treatment of chronic cluster headache (PREVA): A randomised controlled study. *Cephalalgia* 2016; **36**(6): 534-46.
50. Geirsson G, Wang Y, Lindstrom S, Fall M. Traditional acupuncture and electrical stimulation of the posterior tibial nerve. A trial in chronic interstitial cystitis. *Scand J Urol Nephrol* 1993; **27**(1): 67-70.
51. Ghoname EA, Craig WF, White PF, et al. Effectiveness of PENS for lower back pain. *Integrative Medicine* 1999; **2**(1): 19-21.
52. Gokce AH, Gokce FS. Effects of bilateral transcutaneous tibial nerve stimulation on constipation severity in geriatric patients: A prospective clinical study. *Geriatrics & Gerontology International* 2020; **20**(2): 101-5.
53. Gottfried AC, Adler EP, Fernandez-Becker N, Clarke JO, Habtezion A, Nguyen LAB. Transcutaneous vagal nerve stimulation improves symptoms and gastric emptying in patients with ideopathic gastroparesis. *Gastroenterology* 2019; **156**(6): S-789-S-90.
54. Govil M, Mukhopadhyay N, Holwerda T, Sluka K, Rakel B, Schutte DL. Effects of genotype on TENS effectiveness in controlling knee pain in persons with mild to moderate osteoarthritis. *European Journal of Pain* 2020; **24**(2): 398-412.
55. Gu S, Lang H, Gan J, Zheng Z, Zhao F, Tu Q. Effect of transcutaneous electrical acupoint stimulation on gastrointestinal function recovery after laparoscopic radical gastrectomy – A randomized controlled trial. *European journal of integrative medicine* 2019; **26**: 11-7.
56. Gorodetskyi IG, Gorodnichenko AI, Tursin PS, Reshetnyak VK, Uskov ON. Non-invasive interactive neurostimulation in the post-operative recovery of patients with a trochanteric fracture of the femur: a randomised, controlled trial. *Journal of Bone & Joint Surgery, British Volume* 2007; **89**(11): 1488-94.
57. Harrison R, Shore M, Woods T, Mathews G, Gardiner J, Unwin A. A comparative study of transcutaneous electrical nerve stimulation (TENS), entonox, pethidine + promazine and lumbar epidural for pain relief in labor. *Acta obstetrica et gynecologica Scandinavica* 1987; **66**(1): 9-14.
58. Hedner N, Milsom I, Eliasson T, Mannheimer C. [TENS is effective in painful menstruation]. *Lakartidningen* 1996; **93**(13): 1219-22.
59. Herman E, Williams R, Stratford P, Fargas-Babjak A, Trott M. A randomized controlled trial of transcutaneous electrical nerve stimulation (CODETRON) to determine its benefits in a rehabilitation program for acute occupational low back pain. *Spine* 1994; **19**(5): 561-8.
60. Hettrick HH, O'Brien K, Laznick H, et al. Effect of transcutaneous electrical nerve stimulation for the management of burn pruritus: a pilot study. *The Journal of burn care & rehabilitation* 2004; **25**(3): 236-40.
61. Hsieh CYJ, Phillips RB, Adams AH, Pope MH. First prize: Functional outcomes of low back pain: Comparison of four treatment groups in a randomized controlled trial. *Journal of manipulative and physiological therapeutics* 1992; **15**(1): 4-9.



## 10\_OL-TABLE3\_ExcludedStudies

62. Pope MH, Phillips RB, Haugh LD, Hsieh CY, MacDonald L, Haldeman S. A prospective randomized three-week trial of spinal manipulation, transcutaneous muscle stimulation, massage and corset in the treatment of subacute low back pain. *Spine* 1994; **19**(22): 2571-7.
63. Huang S, Peng W, Tian X, et al. Effects of transcutaneous electrical acupoint stimulation at different frequencies on perioperative anesthetic dosage, recovery, complications, and prognosis in video-assisted thoracic surgical lobectomy: a randomized, double-blinded, placebo-controlled trial. *Journal of anesthesia* 2017; **31**(1): 58-65.
64. Huang W, Yu TY, Long WF, Xiao JB. [Application of Transcutaneous Electrical Acupoint Stimulation Combined with Transversus Abdominis Plane Block to Enhanced Recovery After Surgery in Patients Undergoing Laparoscopic Colorectal Cancer Resection: A Randomized Controlled Clinical Trial]. *Zhen ci yan jiu = Acupuncture research* 2018; **43**(10): 611-5.
65. Huang Y, Bian WW, Hou LL. [Effects of transcutaneous electrical acupoint stimulation on pain of patients in expansion process of skin soft tissue dilator on forehead by water injection]. *Zhonghua shao shang za zhi = Zhonghua shaoshang zazhi = Chinese journal of burns* 2019; **35**(3): 193-7.
66. Ing MR, Hellreich PD, Johnson DW, Chen JJ. Transcutaneous electrical nerve stimulation for chronic post-herpetic neuralgia. *International journal of dermatology* 2015; **54**(4): 476-80.
67. Issenman J, Nolan M, Rowley J, Hobby R. Transcutaneous electrical nerve stimulation for pain control after spinal fusion with Harrington rods. A clinical report. *Physical therapy* 1985; **65**(10): 1517-20.
68. Itoh K, Hirota S, Katsumi Y, Ochi H, Kitakoji H. A pilot study on using acupuncture and transcutaneous electrical nerve stimulation (TENS) to treat knee osteoarthritis (OA). *Chin Med* 2008; **3**: 2.
69. Itoh K, Itoh S, Katsumi Y, Kitakoji H. A pilot study on using acupuncture and transcutaneous electrical nerve stimulation to treat chronic non-specific low back pain. *Complementary therapies in clinical practice* 2009; **15**(1): 22-5.
70. Jardim P. Transcutaneous electrical nerve stimulation for non-acute low back pain: a randomized double-blind study of conventional, nu-waveform, acupuncture-type and sham therapies. Annual Meeting, American Academy of Orthopaedic Surgeons, 1997; 1997; 1997.
71. Jeans M. Relief of chronic pain by brief, intense transcutaneous electrical stimulation - a double blind study. In: Bonica J, Liebeskind J, Albe-Fessard D, eds. *Advances in Pain Research and Therapy*. New York: Raven Press; 1979: 601-6.
72. Jiang L, Yuan DL, Li M, et al. Combination of flunarizine and transcutaneous supraorbital neurostimulation improves migraine prophylaxis. *Acta Neurologica Scandinavica* 2019; **139**(3): 276-83.
73. Juárez-Albuiexch ML, Redondo-González O, Tello I, Collado-Vázquez S, Jiménez-Antona C. Vojta Therapy versus transcutaneous electrical nerve stimulation for lumbosciatica syndrome: A quasi-experimental pilot study. *Journal of Bodywork & Movement Therapies* 2020; **24**(1): 39-46.
74. Jünger M, Arnold A, Zuder D, Stahl HW, Heising S. Local therapy and treatment costs of chronic, venous leg ulcers with electrical stimulation (Dermapulse): a prospective, placebo controlled, double blind trial. *Wound repair and regeneration* 2008; **16**(4): 480-7.
75. Kaplan B, Peled Y, Pardo J, et al. Transcutaneous electrical nerve stimulation (TENS) as a relief for dysmenorrhea. *Clinical and Experimental Obstetrics and Gynecology* 1994; **21**(2): 87-90.
76. Katz J, Melzack R. Auricular transcutaneous electrical nerve stimulation (TENS) reduces phantom limb pain. *Journal of pain and symptom management* 1991; **6**(2): 73-83.
77. Kempf K, Rohling M, Darwish E, et al. High-tone external muscle stimulation for the treatment of chronic sciatica - A randomized controlled crossover trial. *Open Pain Journal* 2018; **11**(1): 21-30.
78. Kho HG, Eijk RJ, Kapteijns WM, van Egmond J. Acupuncture and transcutaneous stimulation analgesia in comparison with moderate-dose fentanyl anaesthesia in major surgery. Clinical efficacy and influence on recovery and morbidity. *Anaesthesia* 1991; **46**(2): 129-35.
79. Kocyigit F, Akalin E, Gezer NS, Orbay O, Kocyigit A, Ada E. Functional magnetic resonance imaging of the effects of low-frequency transcutaneous electrical nerve stimulation on central pain modulation: a double-blind, placebo-controlled trial. *The Clinical journal of pain* 2012; **28**(7): 581-8.
80. Kolen AF, de Nijs RN, Wagemakers FM, Meier AJ, Johnson MI. Effects of spatially targeted transcutaneous electrical nerve stimulation using an electrode array that measures skin resistance on pain and mobility in patients with osteoarthritis in the knee: a randomized controlled trial. *Pain* 2012; **153**(2): 373-81.
81. Kolu E, Buyukavci R, Akturk S, Eren F, Ersoy Y. Comparison of high-intensity laser therapy and combination of transcutaneous nerve stimulation and ultrasound treatment in patients with chronic lumbar radiculopathy: A randomized single-blind study. *Pakistan Journal of Medical Sciences* 2018; **34**(3): 530-4.
82. Koo CC, Lin RS, Wang TG, et al. Novel Noxipoint Therapy versus Conventional Physical Therapy for Chronic Neck and Shoulder Pain: Multicentre Randomised Controlled Trials. *Scientific reports* 2015; **5**: 16342.
83. Kumar D, Marshall HJ. Diabetic peripheral neuropathy: amelioration of pain with transcutaneous electrostimulation. *Diabetes care* 1997; **20**(11): 1702-5.

## 10\_OL-TABLE3\_ExcludedStudies

84. Kumar D, Alvaro MS, Julka IS, Marshall HJ. Diabetic peripheral neuropathy. Effectiveness of electrotherapy and amitriptyline for symptomatic relief. *Diabetes Care* 1998; **21**(8): 1322-5.
85. Labrunée M, Boned A, Granger R, et al. Improved Walking Claudication Distance with Transcutaneous Electrical Nerve Stimulation: an Old Treatment with a New Indication in Patients with Peripheral Artery Disease. *American journal of physical medicine & rehabilitation* 2015; **94**(11): 941-9.
86. Lan F, Ma YH, Xue JX, Wang TL, Ma DQ. Transcutaneous electrical nerve stimulation on acupoints reduces fentanyl requirement for postoperative pain relief after total hip arthroplasty in elderly patients. *Minerva anesthesiologica* 2012; **78**(8): 887-95.
87. Lanham RH, Powell S, Hendrix BE. Efficacy of hypothermia and transcutaneous electrical nerve stimulation in podiatric surgery. *J Foot Surg* 1984; **23**(2): 152-8.
88. Lee JC, Lin DT, Hong CZ. The effectiveness of simultaneous thermotherapy with ultrasound and electrotherapy with combined AC and DC current on the immediate pain relief of myofascial trigger points. *Journal of Musculoskeletal Pain* 1997; **5**(1): 81-90.
89. Lee B, Hong SH, Kim K, et al. Efficacy of the device combining high-frequency transcutaneous electrical nerve stimulation and thermotherapy for relieving primary dysmenorrhea: a randomized, single-blind, placebo-controlled trial. *European journal of obstetrics, gynecology, and reproductive biology* 2015; **194**: 58-63.
90. Lehmann TR, Russell DW, Spratt KF. The impact of patients with nonorganic physical findings on a controlled trial of transcutaneous electrical nerve stimulation and electroacupuncture. *Spine* 1983; **8**(6): 625-34.
91. Lehmann TR, Russell DW, Spratt KF, et al. Efficacy of electroacupuncture and TENS in the rehabilitation of chronic low back pain patients. *Pain* 1986; **26**(3): 277-90.
92. Lerma K, Goldthwaite LM, Blumenthal PD, Shaw KA. Transcutaneous electrical nerve stimulation (TENS) for pain control during first-trimester abortion: A single-blinded randomized controlled trial. *Contraception* 2020; **101**(5): 357.
93. Li M, Xu F, Liu M, Li Y, Lin L, Chen J. Promoting effects and autonomic mechanisms of transcutaneous electrical acustimulation on the postoperative recovery after caesarian section *Gastroenterology* 2019; **156**(6): S-584-S-5.
94. Lin Y, Yang W, Li Y, et al. Mechanism of acupoint transcutaneous electric stimulation on analgesic anesthesia in the patients undergoing general anesthesia anorectal operation. *Zhongguo zhen jiu [Chinese acupuncture & moxibustion]* 2017; **37**(7): 747-52.
95. Liu X, Li S, Wang B, An L, Ren X, Wu H. Intraoperative and postoperative anaesthetic and analgesic effect of multipoint transcutaneous electrical acupuncture stimulation combined with sufentanil anaesthesia in patients undergoing supratentorial craniotomy. *Acupuncture in medicine : journal of the British Medical Acupuncture Society* 2015; **33**(4): 270-6.
96. Loeser J, Black R, Christman A. Relief of pain by transcutaneous electrical nerve stimulation. *Journal of neurosurgery* 1975; **42**: 308-14.
97. Lone AR, Wafai ZA, Buth BA, Wani TA, Koul PA, Khan SH. Analgesic efficacy of transcutaneous electrical nerve stimulation compared with diclofenac sodium in osteo-arthritis of the knee. *Physiotherapy* 2003; **89**(8): 478-85.
98. Lorenzana FD. A randomized controlled trial of the efficacy of transcutaneous electrical nerve stimulation (TENS) versus lidocaine in the relief of episiotomy pain. *Philippine journal of obstetrics & gynecology : official publication, Philippine Obstetrical and Gynecological Society* 1999; **23**(4): 135-42.
99. Lv Y, He H, Xie J, et al. Effects of transcutaneous acupoint electrical stimulation combined with low-dose sufentanil pretreatment on the incidence and severity of etomidate-induced myoclonus: a randomized controlled trial. *Medicine* 2018; **97**(23): e10969.
100. Macdonald AJR, Coates TW. The discovery of transcutaneous spinal electroanalgesia and its relief of chronic pain. *Physiotherapy* 1995; **81**(11): 653-61.
101. Malmir K, Ghotbi N, Mir SM, Moradi B. Comparing effects of cryotherapy and transcutaneous electrical nerve stimulation on signs and symptoms of delayed onset muscle soreness in amateur athletes. *Open Pain Journal* 2017; **10**: 73-80.
102. Maria Fernandez-Seguin L, Marcos Heredia-Rizo A, Antonio Diaz-Mancha J, Gonzalez-Garcia P, Ramos-Ortega J, Munuera-Martinez PV. Immediate and short-term radiological changes after combining static stretching and transcutaneous electrical stimulation in adults with cavus foot A randomized controlled trial. *Medicine* 2019; **98**(46): e18018.
103. Matsuse H, Segal NA, Rabe KG, Shiba N. The Effect of Neuromuscular Electrical Stimulation During Walking on Muscle Strength and Knee Pain in Obese Women With Knee Pain: A Randomized Controlled Trial. *American journal of physical medicine & rehabilitation* 2020; **99**(1): 56-64.
104. McGough JJ, Sturm A, Cowen J, et al. Double-Blind, Sham-Controlled, Pilot Study of Trigeminal Nerve Stimulation for mumm. *Journal of the American Academy of Child and Adolescent Psychiatry* 2019; **58**(4): 403-11.e3.
105. Meade CS, Lukas SE, McDonald LJ, et al. A randomized trial of transcutaneous electric acupoint stimulation as adjunctive treatment for opioid detoxification. *Journal of substance abuse treatment* 2010; **38**(1): 12-21.

## 10\_OL-TABLE3\_ExcludedStudies

106. Meechan JG, Gowans AJ, Welbury RR. The use of patient-controlled transcutaneous electronic nerve stimulation (TENS) to decrease the discomfort of regional anaesthesia in dentistry: a randomised controlled clinical trial. *Journal of dentistry* 1998; **26**(5-6): 417-20.
107. Melzack R. Prolonged relief of pain by brief, intense transcutaneous somatic stimulation. *Pain* 1975; **1**(4): 357-73.
108. Melzack R, Jeans ME, Stratford JG, Monks RC. Ice massage and transcutaneous electrical stimulation: comparison of treatment for low-back pain. *Pain* 1980; **9**(2): 209-17.
109. Mi Z, Gao J, Chen X, Ge Y, Lu K. [Effects of transcutaneous electrical acupoint stimulation on quality of recovery during early period after laparoscopic cholecystectomy]. *Zhongguo zhen jiu = Chinese acupuncture & moxibustion* 2018; **38**(3): 256-60.
110. Miller Jones CM. Transcutaneous nerve stimulation in labour. *Anaesthesia* 1980; **35**(4): 372-5.
111. Monaco A, Sgolastra F, Pietropaoli D, Giannoni M, Cattaneo R. Comparison between sensory and motor transcutaneous electrical nervous stimulation on electromyographic and kinesiographic activity of patients with temporomandibular disorder: a controlled clinical trial. *BMC musculoskeletal disorders* 2013; **14**.
112. Mucuk S, Baser M. Effects of noninvasive electroacupuncture on labour pain and duration. *Journal of clinical nursing* 2014; **23**(11-12): 1603-10.
113. Mummolo S Dds P, Nota A Dds P, Tecco S, et al. Ultra-low-frequency transcutaneous electric nerve stimulation (ULF-TENS) in subjects with craniofacial pain: A retrospective study. *Cranio : the journal of craniomandibular practice* 2018: 1-6.
114. Murina F, Bernorio R, Palmiotto R. The use of amielle vaginal trainers as adjuvant in the treatment of vestibulodynia: An observational multicentric study. *MedGenMed Medscape General Medicine* 2008; **10** (1) (no pagination)(23).
115. Murina F, Felice R, Di Francesco S, Oneda S. Vaginal diazepam plus transcutaneous electrical nerve stimulation to treat vestibulodynia: A randomized controlled trial. *European journal of obstetrics, gynecology, and reproductive biology* 2018; **228**: 148-53.
116. Mysliwiec A, Saulicz E, Kuszewski M, Kokosz M, Wolny T. Assessment of the influence of Saunders traction and transcutaneous electrical nerve stimulation on hand grip force in patients with neck pain. *Ortopedia, traumatologia, rehabilitacja* 2011; **13**(1): 37-44.
117. Naeser MA, Hahn KA, Lieberman BE, Branco KF. Carpal tunnel syndrome pain treated with low-level laser and microamperes transcutaneous electric nerve stimulation: a controlled study. *Archives of physical medicine and rehabilitation* 2002; **83**(7): 978-88.
118. Nakano J, Ishii K, Fukushima T, et al. Effects of transcutaneous electrical nerve stimulation on physical symptoms in advanced cancer patients receiving palliative care. *International Journal of Rehabilitation Research* 2020; **43**(1): 62-8.
119. Ngai SPC, Jones AYM, Hui-Chan CWY, Ko FWS, Hui DSC. Effect of 4 weeks of Acu-TENS on functional capacity and beta-endorphin level in subjects with chronic obstructive pulmonary disease: A randomized controlled trial. *Respiratory Physiology & Neurobiology* 2010; **173**(1): 29-36.
120. Noehren B, Dailey DL, Rakel BA, et al. Effect of transcutaneous electrical nerve stimulation on pain, function, and quality of life in fibromyalgia: a double-blind randomized clinical trial. *Physical therapy* 2015; **95**(1): 129-40.
121. Nourbakhsh MR, Fearon FJ. An alternative approach to treating lateral epicondylitis. A randomized, placebo-controlled, double-blinded study. *Clinical rehabilitation* 2008; **22**(7): 601-9.
122. Okonkwo UP, Ibeneme SC, Ihegihu EY, et al. Effects of transcutaneous electrical nerve stimulation in the Management of Post-Injection Sciatic Pain in a non-randomized controlled clinical trial in Nnewi, Nigeria. *BMC complementary and alternative medicine* 2018; **18**.
123. Oyibo SO, Breislin K, Boulton AJM. Electrical stimulation therapy through stocking electrodes for painful diabetic neuropathy: A double blind, controlled crossover study. *Diabetic Medicine* 2004; **21**(8): 940-4.
124. Ozen S, Cosar SNS, Cabioglu MT, Cetin N. A Comparison of Physical Therapy Modalities Versus Acupuncture in the Treatment of Fibromyalgia Syndrome: A Pilot Study. *Journal of Alternative and Complementary Medicine* 2019; **25**(3): 296-304.
125. Park J, Seo D, Choi W, Lee SW. The effects of exercise with TENS on spasticity, balance, and gait in patients with chronic stroke: A randomized controlled trial. *Medical Science Monitor* 2014; **20**: 1890-6.
126. Patel JI, Kumar BNP, Ravish VN. EFFECT OF MCKENZIE METHOD WITH TENS ON LUMBAR RADICULOPATHY - A RANDOMIZED CONTROLLED TRIAL. *International Journal of Physiotherapy* 2016; **3**(1): 94-9.
127. Peng T, Li XT, Zhou SF, Xiong Y, Kang Y, Cheng HD. Transcutaneous Electrical Nerve Stimulation on Acupoints Relieves Labor Pain: A Non-randomized Controlled Study. *Chinese Journal of Integrative Medicine* 2010; **16**(3): 234-8.
128. Polat CS, Dogan A, Ozcan DS, Koseoglu BF, Akselim SK, Onat SS. The Effectiveness of Transcutaneous Electrical Nerve Stimulation in Knee Osteoarthritis with Neuropathic Pain Component: A Randomized Controlled Study. *Turk Osteoporoz Dergisi-Turkish Journal of Osteoporosis* 2017; **23**(2): 47-51.

## 10\_OL-TABLE3\_ExcludedStudies

129. Pope M, Phillips R, Haugh L, Hsieh C, MacDonald L, Haldeman S. A prospective randomized three-week trial of spinal manipulation, transcutaneous muscle stimulation, massage and corset in the treatment of subacute low back pain. *Spine* 1994; **19**(22): 2571-7.
130. Pour NH, Kaviani M, Razeghi M. Comparison of effect of transcutaneous electrical nerve stimulation and acupressure in decreasing labor pain in primiparous women. [Persian]. *Iranian Journal of Obstetrics, Gynecology and Infertility* 2012; **15**(12): 27-33.
131. Quinton DN, Sloan JP, Theakstone J. Transcutaneous electrical nerve stimulation in acute hand infections. *Journal of hand surgery (Edinburgh, Scotland)* 1987; **12**(2): 267-8.
132. Radhakrishna N, Rajagopalan V, Chouhan RS, Singh S, MP P. Effect of Preoperative Transcutaneous Electrical Nerve Stimulation on Intraoperative Anesthetic Drug Consumption and Pain Scores in Patients Undergoing Lumbar Discectomy under General Anesthesia. *Indian J Pain* 2020; **34**: 22-6.
133. Rapoport AM, Bonner JH, Lin T, et al. Remote electrical neuromodulation (REN) in the acute treatment of migraine: a comparison with usual care and acute migraine medications. *Journal of Headache & Pain* 2019; **20**(1): N.PAG.
134. Razavi M, Jansen GB. Effects of acupuncture and placebo TENS in addition to exercise in treatment of rotator cuff tendinitis. *Clinical rehabilitation* 2004; **18**(8): 872-8.
135. Reich BA. Non-invasive treatment of vascular and muscle contraction headache: a comparative longitudinal clinical study. *Headache* 1989; **29**(1): 34-41.
136. Reichstein L, Labrenz S, Ziegler D, Martin S. Effective treatment of symptomatic diabetic polyneuropathy by high-frequency external muscle stimulation. *Diabetologia* 2005; **48**(5): 824-8.
137. Rodriguez-Fernandez AL, Garrido-Santofimia V, Geita-Rodriguez J, Fernandez-De-Las-Peas C. Effects of burst-type transcutaneous electrical nerve stimulation on cervical range of motion and latent myofascial trigger point pain sensitivity. *Archives of physical medicine and rehabilitation* 2011; **92**(9): 1353-8.
138. Rooney SM, Jain S, McCormack P, Bains MS, Martini N, Goldiner PL. A comparison of pulmonary function tests for postthoracotomy pain using cryoanalgesia and transcutaneous nerve stimulation. *Annals of Thoracic Surgery* 1986; **41**(2): 204-7.
139. Roth PM, Thrash WJ. Effect of transcutaneous electrical nerve stimulation for controlling pain associated with orthodontic tooth movement. *American journal of orthodontics and dentofacial orthopedics : official publication of the American Association of Orthodontists, its constituent societies, and the American Board of Orthodontics* 1986; **90**(2): 132-8.
140. Santiesteban AJ, Burnham TL, George KL. Primary spasmodic dysmenorrhea: The use of TENS on acupuncture points. *American Journal of Acupuncture* 1985; **13**(1): 35-42.
141. Sari Z, Aydoğdu O, Demirbükten İ, Yurdalan SU, Polat MG. A Better Way to Decrease Knee Swelling in Patients with Knee Osteoarthritis: a Single-Blind Randomised Controlled Trial. *Pain research & management* 2019; **2019**: 8514808.
142. Schuster GD, Infante MC. Pain relief after low back surgery: the efficacy of transcutaneous electrical nerve stimulation. *Pain* 1980; **8**(3): 299-302.
143. Schoenen J, Jensen RH, Lantéri-Minet M, et al. Stimulation of the sphenopalatine ganglion (SPG) for cluster headache treatment. Pathway CH-1: a randomized, sham-controlled study. *Cephalalgia* 2013; **33**(10): 816-30.
144. Schomburg F, Carter-Baker S. Transcutaneous electrical nerve stimulation for postlaparotomy pain. *Physical therapy* 1983; **63**(2): 188-93.
145. Selfe TK, Bourguignon C, Taylor AG. Effects of noninvasive interactive neurostimulation on symptoms of osteoarthritis of the knee: a randomized, sham-controlled pilot study. *Journal of alternative and complementary medicine (New York, NY)* 2008; **14**(9): 1075-81.
146. Shirazi ZR, Shafae R, Abbasi L. The effects of transcutaneous electrical nerve stimulation on joint position sense in patients with knee joint osteoarthritis. *Physiotherapy theory and practice* 2014; **30**(7): 495-9.
147. Silberstein SD, Mechtler LL, Kudrow DB, et al. Non-Invasive Vagus Nerve Stimulation for the ACute Treatment of Cluster Headache: Findings From the Randomized, Double-Blind, Sham-Controlled ACT1 Study. 2016; **56**(8): 1317-32.
148. Silberstein SD, Calhoun AH, Lipton RB, et al. Chronic migraine headache prevention with noninvasive vagus nerve stimulation: The EVENT study. *Neurology* 2016; **87**(5): 529-38.
149. Simon CB, Riley JL, Fillingim RB, Bishop MD, George SZ. Age Group Comparisons of TENS Response Among Individuals With Chronic Axial Low Back Pain. *Journal of Pain* 2015; **16**(12): 1268-79.
150. Simpson KH, Ward J. A randomized, double-blind, crossover study of the use of transcutaneous spinal electroanalgesia in patients with pain from chronic critical limb ischemia. *Journal of pain and symptom management* 2004; **28**(5): 511-6.
151. Solomon S, Guglielmo KM. Treatment of headache by transcutaneous electrical stimulation. *Headache* 1985; **25**(1): 12-5.
152. Solomon S, Elkind A, Freitag F, et al. Safety and effectiveness of cranial electrotherapy in the treatment of tension headache. *Headache* 1989; **29**(7): 445-50.
153. Sonde L, Kalimo H, Fernaeus SE, Viitanen M. Low TENS treatment on post-stroke paretic arm: a three-year follow-up. *Clinical rehabilitation* 2000; **14**(1): 14-9.
154. Stralka SW, Jackson JA, Lewis AR. Treatment of hand and wrist pain: A randomized clinical trial of high voltage pulsed, direct current built into a wrist splint. *AAOHN Journal* 1998; **46**(5): 233-6.



## 10\_OL-TABLE3\_ExcludedStudies

155. Stratton S, Smith M. Postoperative thoracotomy. Effect of transcutaneous electrical nerve stimulation on forced vital capacity. *Physical therapy* 1980; **60**(1): 45-7.
156. Strayhorn G. Transcutaneous electrical nerve stimulation and postoperative use of narcotic analgesics. *J Natl Med Assoc* 1983; **75**(8): 811-6.
157. Sun K, Xing T, Zhang F, et al. Perioperative Transcutaneous Electrical Acupoint Stimulation for Postoperative Pain Relief Following Laparoscopic Surgery: A Randomized Controlled Trial. *The Clinical journal of pain* 2017; **33**(4): 340-7.
158. Sunshine W, Field TM, Quintino O, et al. Fibromyalgia benefits from massage therapy and transcutaneous electrical stimulation. *Journal of Clinical Rheumatology* 1996; **2**(1): 18-22.
159. Takla MKN, Rezk-Allah SS. Immediate Effects of Simultaneous Application of Transcutaneous Electrical Nerve Stimulation and Ultrasound Phonophoresis on Active Myofascial Trigger Points: A Randomized Controlled Trial. *American journal of physical medicine & rehabilitation* 2018; **97**(5): 332-8.
160. Takla MKN. Low-frequency high-intensity versus medium-frequency low-intensity combined therapy in the management of active myofascial trigger points: A randomized controlled trial. *Physiotherapy research international : the journal for researchers and clinicians in physical therapy* 2018; **23**(4): e1737.
161. These MS, Hughes M, Biggs J. Electrical stimulation for chronic non-specific low back pain in a working-age population: a 12-week double blinded randomized controlled trial. *BMC musculoskeletal disorders* 2013; **14**: 117.
162. Thompson JW, Bower S, Tyrer SP. A double blind randomised controlled clinical trial on the effect of transcutaneous spinal electroanalgesia (TSE) on low back pain. *European journal of pain (London, England)* 2008; **12**(3): 371-7.
163. Tok F, Aydemir K, Peker F, Safaz I, Taskaynatan MA, Ozgul A. The effects of electrical stimulation combined with continuous passive motion versus isometric exercise on symptoms, functional capacity, quality of life and balance in knee osteoarthritis: Randomized clinical trial. *Rheumatology international* 2011; **31**(2): 177-81.
164. Tousignant-Laflamme Y, Laroche C, Beaulieu C, Bouchard AJ, Boucher S, Michaud-Létourneau M. A randomized trial to determine the duration of analgesia following a 15- and a 30-minute application of acupuncture-like TENS on patients with chronic low back pain. *Physiotherapy theory and practice* 2017; **33**(5): 361-9.
165. Tu Q, Gan J, Shi J, Yu H, He S, Zhang J. Effect of transcutaneous electrical acupoint stimulation on postoperative analgesia after ureteroscopic lithotripsy: a randomized controlled trial. *Urolithiasis* 2019; **47**(3): 279-87.
166. Vance CG, Chimenti RL, Dailey DL, et al. Development of a method to maximize the transcutaneous electrical nerve stimulation intensity in women with fibromyalgia. *Journal of pain research* 2018; **11**: 2269-78.
167. VanderArk GD, McGrath KA. Transcutaneous electrical stimulation in treatment of postoperative pain. *American journal of surgery* 1975; **130**(3): 338-40.
168. Vincenti E, Cervellin A, Mega M. Comparative study between patients treated with transcutaneous electric stimulation and controls during labour. *Clin Exp Obstet Gynaecol* 1982; **9**: 95-7.
169. Vinterberg H, Donde R, Andersen RB. Transcutaneous nerve-stimulation for relief of pain in patients with rheumatoid arthritis. *Ugeskrift for laeger* 1978; **140**(20): 1149-50.
170. Wang W, George S, Wilimas J. Transcutaneous electrical nerve stimulation treatment of sickle cell pain crises. *Acta haematologica* 1988; **80**(2): 99-102.
171. Wang B, Tang J, White PF, et al. Effect of the intensity of transcutaneous acupoint electrical stimulation on the postoperative analgesic requirement. *Anesthesia and analgesia* 1997; **85**(2): 406-13.
172. Wang B, Xiong X, Li WJJoCA. Study on Transcutaneous Electrical Nerve Stimulation (TENS) Applied to Acupoints for Relieving Labor Pain. 2007; **16**(1): 7.
173. Wang ZL, Chen LF, Zhu WM. Observation on the transient analgesic effect of abdominal acupuncture TENS on pain of neck, shoulder, loin and legs. [Chinese]. *Zhongguo zhen jiu = Chinese acupuncture & moxibustion* 2007; **27**(9): 657-9.
174. Wang K, Svensson P, Arendt-Nielsen L. Effect of acupuncture-like electrical stimulation on chronic tension-type headache: a randomized, double-blinded, placebo-controlled trial. *Clinical Journal of Pain* 2007; **23**(4): 316-22.
175. Wang JL, Ren QS, Shen CC, Xie WX, Zheng RX, Ni JW. [Effect of transcutaneous acupoint electrical stimulation on blood bioactive compounds involving cerebral injury during craniotomy]. *Zhen ci yan jiu = Acupuncture research* 2008; **33**(1): 26-30.
176. Wang ZX. Clinical observation on electroacupuncture at acupoints for treatment of senile radical sciatica. [Chinese]. *Zhongguo zhen jiu = Chinese acupuncture & moxibustion* 2009; **29**(2): 126-8.
177. Wang H, Xie Y, Zhang Q, et al. Transcutaneous electric acupoint stimulation reduces intra-operative remifentanyl consumption and alleviates postoperative side-effects in patients undergoing sinusotomy: a prospective, randomized, placebo-controlled trial. *British journal of anaesthesia* 2014; **112**(6): 1075-82.
178. Ward AR, Lucas-Toumbourou S, McCarthy B. A comparison of the analgesic efficacy of medium-frequency alternating current and TENS. *Physiotherapy* 2009; **95**(4): 280-8.
179. Wattrisse G, Leroy B, Dufossez F, Bui Huu Tai R. Transcutaneous electric stimulation of the brain: a comparative study of the effects of its combination with peridural anesthesia using bupivacaine-fentanyl during obstetrical analgesia. *Cahiers d'anesthesiologie* 1993; **41**(5): 489-95.

## 10\_OL-TABLE3\_ExcludedStudies

180. Weng CS, Shu SH, Chen CC, Tsai YS, Hu WC, Chang YH. The evaluation of two modulated frequency modes of acupuncture-like tens on the treatment of tennis elbow pain. *Biomedical Engineering - Applications, Basis and Communications* 2005; **17**(5): 236-42.
181. Whitehair VC, Chae J, Hisel T, Wilson RD. The effect of electrical stimulation on impairment of the painful post-stroke shoulder. *Topics in Stroke Rehabilitation* 2019; **26**(7): 544-7.
182. Wieselmann-Penkner K, Janda M, Lorenzoni M, Polansky R. A comparison of the muscular relaxation effect of TENS and EMG-biofeedback in patients with bruxism. *Journal of oral rehabilitation* 2001; **28**(9): 849-53.
183. Williams AE, Miller MM, Bartley EJ, McCabe KM, Kerr KL, Rhudy JL. Impairment of Inhibition of Trigeminal Nociception via Conditioned Pain Modulation in Persons with Migraine Headaches. *Pain Medicine* 2019; **20**(8): 1600-10.
184. Williams KM. Is TENS a Feasible Non-Pharmacologic Adjunctive Treatment for Post-operative Orthopedic Pain? *Pain Management Nursing* 2020; **21**(2): 219.
185. Wilson CM, Stanczak JF. Palliative Pain Management Using Transcutaneous Electrical Nerve Stimulation (TENS). *Rehabilitation Oncology* 2020; **38**(1): E1-E6.
186. Wong RKW, Jones GW, Sagar SM, Babjak AF, Whelan T. A phase I-II study in the use of acupuncture-like transcutaneous nerve stimulation in the treatment of radiation-induced xerostomia in head-and-neck cancer patients treated with radical radiotherapy. *International Journal of Radiation Oncology Biology Physics* 2003; **57**(2): 472-80.
187. Wong RK, James JL, Sagar S, et al. Phase 2 results from Radiation Therapy Oncology Group Study 0537: a phase 2/3 study comparing acupuncture-like transcutaneous electrical nerve stimulation versus pilocarpine in treating early radiation-induced xerostomia. *Cancer* 2012; **118**(17): 4244-52.
188. Wu LL, Su CH, Liu CF. Effects of noninvasive electroacupuncture at Hegu (LI4) and Sanyinjiao (SP6) acupoints on dysmenorrhea: a randomized controlled trial. *Journal of alternative and complementary medicine (New York, NY)* 2012; **18**(2): 137-42.
189. Xu G, Feng Y, Tang WZ, Lv ZW. Transcutaneous electrical nerve stimulation in combination with cobalamin injection for postherpetic neuralgia: a single-center randomized controlled trial. *American journal of physical medicine & rehabilitation / Association of Academic Physiatrists* 2014; **93**(4): 287-98.
190. Xie J, Chen LH, Ning ZY, et al. Effect of transcutaneous electrical acupoint stimulation combined with palonosetron on chemotherapy-induced nausea and vomiting: a single-blind, randomized, controlled trial. *Chinese journal of cancer* 2017; **36**(1): 6.
191. Yang G, Su YX, Guo YX. Acupuncture like transcutaneous electrical nerve stimulation (Tens) on knee osteoarthritis (KOA) with low pain: a pilot study. *International Journal of Clinical and Experimental Medicine* 2017; **10**(1): 1059-65.
192. Yang Y, Yim J, Choi W, Lee S. Improving slow-transit constipation with transcutaneous electrical stimulation in women: A randomized, comparative study. *Women & health* 2017; **57**(4): 494-507.
193. Yao Y, Zhao Q, Gong C, et al. Transcutaneous Electrical Acupoint Stimulation Improves the Postoperative Quality of Recovery and Analgesia after Gynecological Laparoscopic Surgery: A Randomized Controlled Trial. *Evid Based Complement Alternat Med* 2015; **2015**: 324360.
194. Yarnitsky D, Volokh L, Ironi A, et al. Nonpainful remote electrical stimulation alleviates episodic migraine pain. *Neurology* 2017; **88**(13): 1250-5.
195. Yarnitsky D, Dodick DW, Grosberg BM, et al. Remote Electrical Neuromodulation (REN) Relieves Acute Migraine: a Randomized, Double-Blind, Placebo-Controlled, Multicenter Trial. *Headache* 2019.
196. Yeh ML, Chung YC, Chen KM, Tsou MY, Chen HH. Acupoint electrical stimulation reduces acute postoperative pain in surgical patients with patient-controlled analgesia: a randomized controlled study. *Alternative therapies in health and medicine* 2010; **16**(6): 10-8.
197. Yeh M-L, Chung Y-C, Hsu L-C, Hung S-H. Effect of transcutaneous acupoint electrical stimulation on post-hemorrhoidectomy-associated pain, anxiety, and heart rate variability: A randomized-controlled study. *Clinical Nursing Research* 2018; **27**(4): 450-66.
198. Yilmaz M, Tarakci D, Tarakci E. Comparison of high-intensity laser therapy and combination of ultrasound treatment and transcutaneous nerve stimulation on cervical pain associated with cervical disc herniation: A randomized trial. *Complementary therapies in medicine* 2020; **49**: 102295.
199. Yip YB, Sonny Tse HM, Wu KK. An experimental study comparing the effects of combined transcutaneous acupoint electrical stimulation and electromagnetic millimeter waves for spinal pain in Hong Kong. *Complementary therapies in clinical practice* 2007; **13**(1): 4-14.
200. Youssef T, Youssef M, Thabet W, et al. Randomized clinical trial of transcutaneous electrical posterior tibial nerve stimulation versus lateral internal sphincterotomy for treatment of chronic anal fissure. *International journal of surgery (London, England)* 2015; **22**: 143-8.
201. Yu X, Zhang F, Chen B. The effect of TEAS on the quality of early recovery in patients undergoing gynecological laparoscopic surgery: a prospective, randomized, placebo-controlled trial. *Trials* 2020; **21**(1).
202. Zeb A, Arsh A, Bahadur S, Ilyas SM. Effectiveness of transcutaneous electrical nerve stimulation in management of neuropathic pain in patients with post traumatic incomplete spinal cord injuries. *Pakistan journal of medical sciences* 2018; **34**(5): 1177-80.



## 10\_OL-TABLE3\_ExcludedStudies

203. Zhan W, Tian W. Addition of transcutaneous electric acupoint stimulation to transverse abdominis plane block for postoperative analgesia in abdominal surgery: A randomized controlled trial. *European Journal of Integrative Medicine* 2020; **35**.
204. Zhang Q, Gao Z, Wang H, et al. The effect of pre-treatment with transcutaneous electrical acupoint stimulation on the quality of recovery after ambulatory breast surgery: a prospective, randomised controlled trial. *Anaesthesia* 2014; **69**(8): 832-9.
205. Zhang H, Lei C, Zhang TY, et al. Randomized controlled trial of TEAS with different acupoints combination on opioids consumption in patients undergoing off-pump coronary artery bypass grafting. *International Journal of Clinical and Experimental Medicine* 2016; **9**(12): 23060-71.
206. Zhang C, Xiao Z, Zhang X, et al. Transcutaneous electrical stimulation of somatic afferent nerves in the foot relieved symptoms related to postoperative bladder spasms. *BMC urology* 2017; **17**(1): 58.
207. Zhang XY, Fu Y, Zhang XD, Ding JX, Hua KQ. The effect of transcutaneous electrical stimulation treatment in combination with intraoperative nerve staining on sexual function after radical hysterectomy: a pilot study. *European journal of gynaecological oncology* 2020; **41**(2): 188-91.
208. Zhao WL, Wang C, Li ZZ, et al. Efficacy and Safety of Transcutaneous Electrical Acupoint Stimulation to Treat Muscle Spasticity following Brain Injury: A Double-Blinded, Multicenter, Randomized Controlled Trial. *PloS one* 2015; **10**(2).
209. Zhou D, Hu B, He S, et al. Transcutaneous electrical acupoint stimulation accelerates the recovery of gastrointestinal function after cesarean section: A randomized controlled trial. *Evidence-Based Complementary and Alternative Medicine* 2018; **2018**: 7341920.
210. Zizic TM, Hoffman KC, Holt PA, et al. The treatment of osteoarthritis of the knee with pulsed electrical stimulation. *The Journal of rheumatology* 1995; **22**(9): 1757-61.
