# Supplementary material for: Efficacy and safety of transcutaneous electrical nerve stimulation (TENS) for acute and chronic pain in adults: a systematic review and meta-analysis of 381 studies (the meta-TENS study)
Source: PubMed Central journal article supplement — BMJ Open. 2022 Feb 10;12(2):e051073. doi: 10.1136/bmjopen-2021-051073 (PMC8845179; doi:10.1136/bmjopen-2021-051073), 2022-02-10
Supplement: bmjopen-2021-051073supp007.pdf [file bmjopen-2021-051073supp007.pdf]

## Adverse Events

ONLINE TABLE 4

| Reference                      | Reference number | Extracted Text                                                                                                                                                                                                 | AEs related to TENS               | Statement   | Extractable Data | Comment                                                                               |
|--------------------------------|------------------|----------------------------------------------------------------------------------------------------------------------------------------------------------------------------------------------------------------|-----------------------------------|-------------|------------------|---------------------------------------------------------------------------------------|
| (Abbasi et al., 2019)          | 1                | No statements present                                                                                                                                                                                          | No information to extract         | N           | N                |                                                                                       |
| (Abelson et al., 1983)         | 2                | The only side effect was a slight skin irritation at the site of electrode placement in some of the patients in the transcutaneous electrical nerve stimulation treated group                                  | Skin irritation due to electrodes | Y           | N                | No numerical data to extract                                                          |
| (Abreu et al., 2010)           | 3                | No statements present                                                                                                                                                                                          | No information to extract         | N           | N                |                                                                                       |
| (Acedo et al., 2015)           | 4                | No statements present                                                                                                                                                                                          | No information to extract         | N           | N                |                                                                                       |
| (Adedoyin et al., 2005)        | 5                | No statements present                                                                                                                                                                                          | No information to extract         | N           | N                |                                                                                       |
| (Ahmed, 2010)                  | 6                | Due to the absence of complications and adverse effects of TENS compared to conventional opioids and non-opioid analgesics, we suggest that TENS is a safe and reliable therapeutic procedure. – in Discussion | No information to extract         | Y – 0 tally | N – 0 tally      | Unclear whether the statement on AEs was generic or in relation to the study findings |
| (Ahmed et al., 2020)           | 7                | No statements present                                                                                                                                                                                          | No information to extract         | N           | N                |                                                                                       |
| (Alcidi et al., 2007)          | 8                | No statements present                                                                                                                                                                                          | No information to extract         | N           | N                |                                                                                       |
| (Ali et al., 1981)             | 9                | No statements present                                                                                                                                                                                          | No information to extract         | N           | N                |                                                                                       |
| (Alizade and Ahmadizad, 2009)  | 10               | No statements present                                                                                                                                                                                          | No information to extract         | N           | N                | Only mentions potential irritation of skin in introductory section                    |
| (Allais et al., 2003)          | 11               | No serious side effects occurred in any group during the study.                                                                                                                                                | Reported no adverse events        | Y – 0 tally | N – 0 tally      |                                                                                       |
| (Alm et al., 1979)             | 12               | In our group of 75 patients we found no significant skin reactions                                                                                                                                             | No information to extract         | N           | N                | Only relates to skin reaction, not other AEs                                          |
| (Al-Smadi et al., 2003)        | 13               | No statements present                                                                                                                                                                                          | No information to extract         | N           | N                |                                                                                       |
| (Altay et al., 2010)           | 14               | No statements present                                                                                                                                                                                          | No information to extract         | N           | N                |                                                                                       |
| (Alvarez-Arenal et al., 2002)  | 15               | No statements present                                                                                                                                                                                          | No information to extract         | N           | N                |                                                                                       |
| (Alves Silverio et al., 2015)  | 16               | No statements present                                                                                                                                                                                          | No information to extract         | N           | N                |                                                                                       |
| (Amer-Cuenca et al., 2011)     | 17               | No subject reported adverse events such as skin allergy, pain or burning at the electrode site in either active TENS or placebo TENS groups.                                                                   | Reported no adverse events        | Y – 0 tally | N – 0 tally      |                                                                                       |
| (AminiSaman et al., 2020)      | 18               | No statements present                                                                                                                                                                                          | No information to extract         | N           | N                |                                                                                       |
| (Angulo and Colwell Jr, 1990)  | 19               | No statement present                                                                                                                                                                                           | No information to extract         | N           | N                |                                                                                       |
| (Ardic et al., 2002)           | 20               | No statements present                                                                                                                                                                                          | No information to extract         | N           | N                |                                                                                       |
| (Arvidsson and Eriksson, 1986) | 21               | No statements present                                                                                                                                                                                          | No information to extract         | N           | N                | Conclusion states that TENS lacks side-effects.                                       |
| (Asgari et al., 2018)          | 22               | Student's <i>t</i> -test and chi-square were applied to compare baseline characteristics and side effects among groups.                                                                                        | No information to extract         | N           | N                | No mention of adverse events in results or discussion despite                         |

| Reference                  | Reference number | Extracted Text                                                                                                                                                                                                                       | AEs related to TENS                                      | Statement   | Extractable Data | Comment                                                                                                                                                        |
|----------------------------|------------------|--------------------------------------------------------------------------------------------------------------------------------------------------------------------------------------------------------------------------------------|----------------------------------------------------------|-------------|------------------|----------------------------------------------------------------------------------------------------------------------------------------------------------------|
|                            |                  |                                                                                                                                                                                                                                      |                                                          |             |                  | the method describing how these would be analysed                                                                                                              |
| (Atamaz et al., 2012)      | <sup>23</sup>    | No statements present                                                                                                                                                                                                                | No information to extract                                | N           | N                | Flow chart in Fig 1 shows that 6 participants in TENS groups dropped out because of worsening symptoms                                                         |
| (Aydin et al., 2005)       | <sup>24</sup>    | No complications occurred as a result of the treatments given.                                                                                                                                                                       | Reported no adverse events                               | Y – 0 tally | N – 0 tally      |                                                                                                                                                                |
| (Azatcam et al., 2017)     | <sup>25</sup>    | No statements present                                                                                                                                                                                                                | No information to extract                                | N           | N                |                                                                                                                                                                |
| (Báez-Suárez et al., 2018) | <sup>26</sup>    | No patients in any group reported adverse events such as skin allergy or burning at the electrode site.                                                                                                                              | Reported no adverse events on mothers or new-born babies | Y – 0 tally | N – 0 tally      |                                                                                                                                                                |
| (Bai et al., 2017)         | <sup>27</sup>    | The results of the present study demonstrate that TENS can reduce the intensity of the pain associated with PD without any AEs.                                                                                                      | Reported no adverse events                               | Y – 0 tally | N – 0 tally      |                                                                                                                                                                |
| (Baki et al., 2015)        | <sup>28</sup>    | In our study, TENS has beneficial effects for pain relief after thoracotomy without any side effects; ...                                                                                                                            | Reported no adverse events                               | Y – 0 tally | N – 0 tally      |                                                                                                                                                                |
| (Ballegaard et al., 1985)  | <sup>29</sup>    | No statements present                                                                                                                                                                                                                | No information to extract                                | N           | N                |                                                                                                                                                                |
| (Barbarisi et al., 2010)   | <sup>30</sup>    | No statements present                                                                                                                                                                                                                | No information to extract                                | N           | N                | In the final visit (visit IX), all the groups underwent a clinical-neurologic examination and routine blood tests to evaluate the possibility of side effects. |
| (Barker et al., 2006)      | <sup>31</sup>    | We can recommend this technique because of its simple use and the lack of side-effects in our study population.                                                                                                                      | Reported no adverse events                               | Y – 0 tally | N – 0 tally      |                                                                                                                                                                |
| (Barker et al., 2008)      | <sup>32</sup>    | No statements present                                                                                                                                                                                                                | No information to extract                                | N           | N                | Authors state that patients were asked to report adverse events but these were not recorded in results.                                                        |
| (Başkurt et al., 2006)     | <sup>33</sup>    | No statements present                                                                                                                                                                                                                | No information to extract                                | N           | N                |                                                                                                                                                                |
| (Bayindir et al., 1991)    | <sup>34</sup>    | No statements present<br>Low cost, lack of undesirable side effects, and ease of application can make TENS an acceptable method of reducing postoperative chest pain. ....                                                           | No information to extract                                | N           | N                | No specific mention of monitoring adverse events in methods or results                                                                                         |
| (Beckwée et al., 2018)     | <sup>35</sup>    | No statements present<br>.... TENS could be experienced as painful instead of pain relieving, and thus, TENS could have an adverse effect on pain in a subgroup of patients.                                                         | No information to extract                                | N           | N                | Authors comments refer to patients with central sensitisation                                                                                                  |
| (Benedetti et al., 1997)   | <sup>36</sup>    | No statements present.<br>We emphasize that the absence of complications and side effects of TENS compared with conventional opioid and nonopioid analgesics makes electrical stimulation a safe and reliable therapeutic procedure. | No information to extract                                | N           | N                |                                                                                                                                                                |

| Reference                      | Reference number | Extracted Text                                                                                                                                                                                                                                                                                                                                                                            | AEs related to TENS                                                                                                 | Statement   | Extractable Data | Comment                                                                                                                     |
|--------------------------------|------------------|-------------------------------------------------------------------------------------------------------------------------------------------------------------------------------------------------------------------------------------------------------------------------------------------------------------------------------------------------------------------------------------------|---------------------------------------------------------------------------------------------------------------------|-------------|------------------|-----------------------------------------------------------------------------------------------------------------------------|
| (Bennett et al., 2010)         | 37               | Overall, 9 patients experienced adverse events and median number of adverse events per patient was 2 (range 1, 6). Distribution of adverse events was similar following active or placebo TENS applications (describe in Table 4 of their report)                                                                                                                                         | One adverse event directly related to placebo TENS treatment. Two participants withdrew because of increasing pain. | Y           | Y                | Authors do not describe nature of adverse events reported in table 4.<br><br>Data:<br>TENS = 3 events<br>Placebo = 2 events |
| (Bergeron-Vezina et al., 2018) | 38               | No harms or unintended effects were reported by the participants.                                                                                                                                                                                                                                                                                                                         | Reported no adverse events                                                                                          | Y – 0 tally | N – 0 tally      |                                                                                                                             |
| (Bertalanffy et al., 2005)     | 39               | No statements present<br>Due to its simplicity and lack of side effects, this method should be considered in these patients.                                                                                                                                                                                                                                                              | No information to extract                                                                                           | N           | N                |                                                                                                                             |
| (Bi et al., 2015)              | 40               | No statements present                                                                                                                                                                                                                                                                                                                                                                     | No information to extract                                                                                           | N           | N                |                                                                                                                             |
| (Bilgili et al., 2016)         | 41               | No statements present                                                                                                                                                                                                                                                                                                                                                                     | No information to extract                                                                                           | N           | N                |                                                                                                                             |
| (Binder et al., 2011)          | 42               | No statements present                                                                                                                                                                                                                                                                                                                                                                     | No information to extract                                                                                           | N           | N                |                                                                                                                             |
| (Bjersa and Andersson, 2014)   | 43               | No statements present                                                                                                                                                                                                                                                                                                                                                                     | No information to extract                                                                                           | N           | N                |                                                                                                                             |
| (Bjersa et al., 2015)          | 44               | No statements present                                                                                                                                                                                                                                                                                                                                                                     | No information to extract                                                                                           | N           | N                |                                                                                                                             |
| (Bloodworth et al., 2004)      | 45               | No statements present                                                                                                                                                                                                                                                                                                                                                                     | No information to extract                                                                                           | N           | N                |                                                                                                                             |
| (Bolat et al., 2019)           | 46               | “... prevention of unpleasant feelings or complications. A reddish coloration and burning or itching at the electrode–skin junction can occur due to increased blood circulation. However, we observed none of these side effects in the present study”.                                                                                                                                  | Reported no adverse events                                                                                          | Y - 0 tally | N                |                                                                                                                             |
| (Bono et al., 2015)            | 47               | Neither adverse events nor side effects occurred in the real or sham group.                                                                                                                                                                                                                                                                                                               | Reported no adverse events                                                                                          | Y – 0 tally | N – 0 tally      |                                                                                                                             |
| (Borjesson et al., 1997)       | 48               | No adverse effects were seen.....                                                                                                                                                                                                                                                                                                                                                         | Reported no adverse events                                                                                          | Y = 0 tally | N = 0 tally      |                                                                                                                             |
| (Borjesson et al., 1998)       | 49               | No statements present                                                                                                                                                                                                                                                                                                                                                                     | No information to extract                                                                                           | N           | N                |                                                                                                                             |
| (Borup et al., 2009)           | 50               | No signs of serious or prolonged side effects were found, neither by using acupuncture nor TENS.                                                                                                                                                                                                                                                                                          | 84% of TENS group stated it had no side-effects.                                                                    | Y = 0 tally | N = 0 tally      | No information included on any participants who did experience side-effects.                                                |
| (Breit and Van der Wall, 2004) | 51               | No statements present                                                                                                                                                                                                                                                                                                                                                                     | No information to extract                                                                                           | N           | N                |                                                                                                                             |
| (Buchmuller et al., 2012)      | 52               | Twelve patients presented a serious adverse event during the study: five in the active TENS group and seven in the sham TENS group. None of these events was considered to be attributable to the treatment studied. Skin irritation was observed in 11 patients in the active TENS group (leading to study discontinuation in one patient) and in three patients in the sham TENS group. | No details about adverse events included in report (except for skin irritation)                                     | Y           | Y                | Data:<br>TENS = 11 events<br>Placebo = 3 events                                                                             |
| (Bulut et al., 2011)           | 53               | When side effects were compared, there was no difference between the groups, except skin irritation only in one patient in Group A (p> 0.05).                                                                                                                                                                                                                                             | One patient with skin irritation.                                                                                   | Y           | N                | No numerical data – implies all groups were zero except for                                                                 |

| Reference                                                                            | Reference number                              | Extracted Text                                                                                                                                                                                                                                                                                                                                                                                                                                                                                                                                                                                                                                                                            | AEs related to TENS                      | Statement   | Extractable Data | Comment                                                       |
|--------------------------------------------------------------------------------------|-----------------------------------------------|-------------------------------------------------------------------------------------------------------------------------------------------------------------------------------------------------------------------------------------------------------------------------------------------------------------------------------------------------------------------------------------------------------------------------------------------------------------------------------------------------------------------------------------------------------------------------------------------------------------------------------------------------------------------------------------------|------------------------------------------|-------------|------------------|---------------------------------------------------------------|
|                                                                                      |                                               |                                                                                                                                                                                                                                                                                                                                                                                                                                                                                                                                                                                                                                                                                           |                                          |             |                  | Group A but cannot be certain so not extracting               |
| (Bundsen et al., 1982)                                                               | 54                                            | It can thus be concluded that no adverse effect of TENS is demonstrable by clinical, laboratory or neurological examination of the infants after pain relief by TNS                                                                                                                                                                                                                                                                                                                                                                                                                                                                                                                       | Reported no adverse events               | Y = 0 tally | N = 0 TENS ONLY  |                                                               |
| (Can et al., 2003)                                                                   | 55                                            | No statements present                                                                                                                                                                                                                                                                                                                                                                                                                                                                                                                                                                                                                                                                     | No information to extract                | N           | N                |                                                               |
| (Casale et al., 2013)                                                                | 56                                            | No statements present                                                                                                                                                                                                                                                                                                                                                                                                                                                                                                                                                                                                                                                                     | No information to extract                | N           | N                |                                                               |
| (Çebi, 2019)                                                                         | 57                                            | No statements present                                                                                                                                                                                                                                                                                                                                                                                                                                                                                                                                                                                                                                                                     | No information to extract                | N           | N                |                                                               |
| (Celik et al., 2013)                                                                 | 58                                            | No side effects of low frequency TENS were seen                                                                                                                                                                                                                                                                                                                                                                                                                                                                                                                                                                                                                                           | Reported no adverse events               | Y           | Y                | No numerical data                                             |
| (Cetin et al., 2008)                                                                 | 59                                            | No statements present                                                                                                                                                                                                                                                                                                                                                                                                                                                                                                                                                                                                                                                                     | No information to extract                | N           | N                |                                                               |
| (Chandra et al., 2010)                                                               | 60                                            | The incidence of side effects was negligible in both the groups.                                                                                                                                                                                                                                                                                                                                                                                                                                                                                                                                                                                                                          | Reported no adverse events               | Y = 0 tally | N = 0 tally      |                                                               |
| (Cheing and Hui-Chan, 1999)                                                          | 61                                            | No statements present                                                                                                                                                                                                                                                                                                                                                                                                                                                                                                                                                                                                                                                                     | No information to extract                | N           | N                |                                                               |
| (Cheing and Luk, 2005)                                                               | 62                                            | No statements present                                                                                                                                                                                                                                                                                                                                                                                                                                                                                                                                                                                                                                                                     | No information to extract                | N           | N                |                                                               |
| (Cheing et al., 2002)                                                                | 63                                            | No statements present                                                                                                                                                                                                                                                                                                                                                                                                                                                                                                                                                                                                                                                                     | No information to extract                | N           | N                |                                                               |
| (Cheing et al., 2003)                                                                | 64                                            | No statements present                                                                                                                                                                                                                                                                                                                                                                                                                                                                                                                                                                                                                                                                     | No information to extract                | N           | N                |                                                               |
| (Chellappa and Thirupathy, 2020)                                                     | 65                                            | No statements present                                                                                                                                                                                                                                                                                                                                                                                                                                                                                                                                                                                                                                                                     | No information to extract                | N           | N                |                                                               |
| (Cherian et al., 2016a) – Primary Report<br>Secondary Report (Cherian et al., 2016b) | 66 – Primary Report<br>Secondary Report<br>67 | Patients were observed for adverse effects due to the TENS device throughout the study. Reports were rare but included local irritation at site of pad placement (n = 2) and irritation due to improper brace fitting (n = 1). All of these were minor and self-limited and did not prevent any patients from continuing a full course of TENS treatment (3 months). There were no serious adverse reactions reported. In addition, patients were evaluated for the need for surgery, either total knee arthroplasty or arthroscopy.<br><br>From <sup>67</sup> secondary report: Adverse events seen during the trial included skin irritation, increased pain, and local skin breakdown. | Skin irritation – no further information | Y           | N                | No numerical data from the control group means cannot extract |
| (Chesterton et al., 2013)<br>Secondary Report (Lewis et al., 2015)                   | 68<br>Secondary Report<br>69                  | No adverse reactions to treatment were recorded.                                                                                                                                                                                                                                                                                                                                                                                                                                                                                                                                                                                                                                          | Reported no adverse events               | Y = 0 tally | N = 0 tally      |                                                               |
| (Chia et al., 1990)                                                                  | 70                                            | No statements present                                                                                                                                                                                                                                                                                                                                                                                                                                                                                                                                                                                                                                                                     | No information to extract                | N           | N                |                                                               |
| (Chiou et al., 2019)                                                                 | 71                                            | No statements present                                                                                                                                                                                                                                                                                                                                                                                                                                                                                                                                                                                                                                                                     | No information to extract                | N           | N                |                                                               |

| Reference                       | Reference number | Extracted Text                                                                                                                                                                                                                                                                                                                                                                                                                                                                                                                                                                                                                                               | AEs related to TENS                                                | Statement   | Extractable Data | Comment                                                                                                                                                                                                                   |
|---------------------------------|------------------|--------------------------------------------------------------------------------------------------------------------------------------------------------------------------------------------------------------------------------------------------------------------------------------------------------------------------------------------------------------------------------------------------------------------------------------------------------------------------------------------------------------------------------------------------------------------------------------------------------------------------------------------------------------|--------------------------------------------------------------------|-------------|------------------|---------------------------------------------------------------------------------------------------------------------------------------------------------------------------------------------------------------------------|
| (Chitsaz et al., 2009)          | 72               | TENS: Lost to follow-up (n=1) due to difficulties keeping appointments.<br>Nortriptyline: Withdrawal (n=3) due to adverse effects.<br>Nortriptyline was generally well tolerated and most of the adverse events reported were mild in severity. The most common side effects of nortriptyline were dry mouth (n=13), dizziness (n=6), constipation (n=5), urinary retention (n=5), nausea and headache (n=4). In 3 participants, this resulted in early discontinuation of nortriptyline and the dose of nortriptyline could not be increased per protocol due to these side effects.<br><br>There were no statements about adverse events for TENS present. | Adverse events only in Nortriptyline group.                        | Y           | Y                | Data:<br>Use dropout data resulting from AEs<br><br>TENS = 0<br>Nortriptyline = 3                                                                                                                                         |
| (Chiu et al., 2005)             | 73               | No complications occurred because of any of the treatments given. The reasons for the withdrawals included insufficient time, dissatisfaction with treatment outcome and worsening of symptoms (Figure 2). 1 withdrawal from TENS group due to worsening of symptoms                                                                                                                                                                                                                                                                                                                                                                                         | Reported no adverse events                                         | Y = 0 tally | N = 0 tally      |                                                                                                                                                                                                                           |
| (Cipriano et al., 2008)         | 74               | Electrical stimulation was well-tolerated by all patients and no relevant side effect was observed.                                                                                                                                                                                                                                                                                                                                                                                                                                                                                                                                                          | Reported no adverse events                                         | Y = 0 tally | N = 0 TENS ONLY  |                                                                                                                                                                                                                           |
| (Cipriano et al., 2014)         | 75               | TENS was well tolerated by all patients with no reported side effects.                                                                                                                                                                                                                                                                                                                                                                                                                                                                                                                                                                                       | Reported no adverse events                                         | Y = 0 tally | N = 0 TENS ONLY  |                                                                                                                                                                                                                           |
| (Coelho de Amorim et al., 2014) | 76               | No statements present                                                                                                                                                                                                                                                                                                                                                                                                                                                                                                                                                                                                                                        | No information to extract                                          | N           | N                |                                                                                                                                                                                                                           |
| (Cooperman et al., 1977)        | 77               | No statements present                                                                                                                                                                                                                                                                                                                                                                                                                                                                                                                                                                                                                                        | No information to extract                                          | N           | N                |                                                                                                                                                                                                                           |
| (Coyne et al., 1995)            | 78               | No statements present                                                                                                                                                                                                                                                                                                                                                                                                                                                                                                                                                                                                                                        | No information to extract                                          | N           | N                |                                                                                                                                                                                                                           |
| (Crompton et al., 1992)         | 79               | However, a substantial proportion of women who used the device found it frightening or unpleasant, which we consider unacceptable in the absence of an improvement in pain scores.                                                                                                                                                                                                                                                                                                                                                                                                                                                                           | Participants found the TENS device 'frightening' and 'unpleasant'. | Y           | N                | No numerical data                                                                                                                                                                                                         |
| (Cuschieri et al., 1985)        | 80               | All patients tolerated the TES device well.                                                                                                                                                                                                                                                                                                                                                                                                                                                                                                                                                                                                                  | Reported no adverse events                                         | Y = 0 tally | N = 0 TENS ONLY  |                                                                                                                                                                                                                           |
| (Cuschieri et al., 1987)        | 81               | No untoward side effects were noted.                                                                                                                                                                                                                                                                                                                                                                                                                                                                                                                                                                                                                         | Reported no adverse events                                         | Y = 0 tally | N = 0 tally      |                                                                                                                                                                                                                           |
| (da Silva et al., 2008)         | 82               | No statements present                                                                                                                                                                                                                                                                                                                                                                                                                                                                                                                                                                                                                                        | No information to extract                                          | N           | N                |                                                                                                                                                                                                                           |
| (da Silva et al., 2015)         | 83               | No adverse effects were observed in the TENS group, but 33.3 % of patients in the control group reported drowsiness and nausea.                                                                                                                                                                                                                                                                                                                                                                                                                                                                                                                              | Reported no adverse events in TENS group                           | Y           | Y                | The authors reported stated that 'adverse events for TENS' was an outcome and they presented this data as AEs attributable to the interventions per se. For this reason, we have extracted the data. Nevertheless, we are |

| Reference             | Reference number | Extracted Text                                                                                                                                                                                                                                                                                                                                                                                                                                                                                                                                                                                                                                                                                                                                                                                                                                                                                                                                                                                                                                                                                                                                                                                                                                                                                                                                                                                                                                                                                                                                                                                                                                                                                                                                                                                                                                          | AEs related to TENS       | Statement | Extractable Data | Comment                                                                                                                                                                                                                                                                                                                                                                                                                                                                                                                                                                                    |
|-----------------------|------------------|---------------------------------------------------------------------------------------------------------------------------------------------------------------------------------------------------------------------------------------------------------------------------------------------------------------------------------------------------------------------------------------------------------------------------------------------------------------------------------------------------------------------------------------------------------------------------------------------------------------------------------------------------------------------------------------------------------------------------------------------------------------------------------------------------------------------------------------------------------------------------------------------------------------------------------------------------------------------------------------------------------------------------------------------------------------------------------------------------------------------------------------------------------------------------------------------------------------------------------------------------------------------------------------------------------------------------------------------------------------------------------------------------------------------------------------------------------------------------------------------------------------------------------------------------------------------------------------------------------------------------------------------------------------------------------------------------------------------------------------------------------------------------------------------------------------------------------------------------------|---------------------------|-----------|------------------|--------------------------------------------------------------------------------------------------------------------------------------------------------------------------------------------------------------------------------------------------------------------------------------------------------------------------------------------------------------------------------------------------------------------------------------------------------------------------------------------------------------------------------------------------------------------------------------------|
|                       |                  |                                                                                                                                                                                                                                                                                                                                                                                                                                                                                                                                                                                                                                                                                                                                                                                                                                                                                                                                                                                                                                                                                                                                                                                                                                                                                                                                                                                                                                                                                                                                                                                                                                                                                                                                                                                                                                                         |                           |           |                  | concerned that this data reflects efficacy of interventions to reduce AEs (drowsiness, nausea,) associated with drugs (morphine, Dipyrone) rather than TENS<br><br>Data:<br>TENS = 0 events / 21<br>Control = 7 events / 21<br>participants                                                                                                                                                                                                                                                                                                                                                |
| (Dailey et al., 2013) | 84               | No statements present                                                                                                                                                                                                                                                                                                                                                                                                                                                                                                                                                                                                                                                                                                                                                                                                                                                                                                                                                                                                                                                                                                                                                                                                                                                                                                                                                                                                                                                                                                                                                                                                                                                                                                                                                                                                                                   | No information to extract | N         | N                |                                                                                                                                                                                                                                                                                                                                                                                                                                                                                                                                                                                            |
| (Dailey et al., 2020) | 85               | <p>There were 30 adverse events related to TENS intervention in 30 participants on visits 1, 2, or 3. The most common adverse events were pain with TENS (4.8% in the active TENS group, 4% in the placebo TENS group, and 1% in the no TENS group) and skin irritation with electrodes (4.8% in the active TENS group, 1% in the placebo TENS group, and 0% in the no TENS group). Adverse events reported on visit 2 occurred during the first treatment at that visit, and adverse events reported on visit 3 were during treatment at that visit and during the 4-week period of home use.</p> <p>Serious Adverse Events.<br/>In the course of the trial, four serious adverse events (study related, n=1 and non-study related, n=3) were reported between April 2014 and April 2016 and all were categorized as hospitalization. For the study related event, the participant complained of chest pain during the 6MWT, was admitted to ER, hospitalized without diagnosed myocardial damage and recovered with treatment. For the three participant's categorized as non-study related: (1) report of chest pain at home, referred to primary care provider, admitted to ER and hospitalized with changes for thyroid medication and recovered with treatment (2) report of GI symptoms, admitted to hospital for dehydration and recovered with treatment and (3) report of depression, admitted to hospital for treatment and condition was still present and being treated at the end of her participation in the study. As a group, for these four participants, the average age was 49.75 years, ranging from 40 to 59 years. With respect to treatment group, one event occurred prior to randomization and three occurred after randomization to treatment groups (placebo-TENS, n=1 and no-TENS, n=2). The participants were further</p> | Y                         | Y         | Y                | <p>TENS = 17/103<br/>Placebo = 3/119</p> <p>Taken from data in Supplementary Table 7, available on the Arthritis &amp; Rheumatology web site at <a href="http://onlinelibrary.wiley.com/doi/10.1002/art.41170/abstract">http://onlinelibrary.wiley.com/doi/10.1002/art.41170/abstract</a>, shows rates of TENS-related Adverse events by visit. There were 4 serious adverse events, with none related to TENS use (Supplementary Results, <a href="http://onlinelibrary.wiley.com/doi/10.1002/art.41170/abstract">http://onlinelibrary.wiley.com/doi/10.1002/art.41170/abstract</a>).</p> |

| Reference                  | Reference number                  | Extracted Text                                                                                                                                                                                                                                                                                                                                                                                                                                                                                                                                                                                                                                                                                                                                                                                                                                                                                                                                                                                                                | AEs related to TENS                                                                                                   | Statement      | Extractable Data      | Comment                                                                                                                                                               |
|----------------------------|-----------------------------------|-------------------------------------------------------------------------------------------------------------------------------------------------------------------------------------------------------------------------------------------------------------------------------------------------------------------------------------------------------------------------------------------------------------------------------------------------------------------------------------------------------------------------------------------------------------------------------------------------------------------------------------------------------------------------------------------------------------------------------------------------------------------------------------------------------------------------------------------------------------------------------------------------------------------------------------------------------------------------------------------------------------------------------|-----------------------------------------------------------------------------------------------------------------------|----------------|-----------------------|-----------------------------------------------------------------------------------------------------------------------------------------------------------------------|
|                            |                                   | categorized by medication (opioid, n=1 and non-opioid, n=3) and location (TN, n=3 and IA, n=1).                                                                                                                                                                                                                                                                                                                                                                                                                                                                                                                                                                                                                                                                                                                                                                                                                                                                                                                               |                                                                                                                       |                |                       |                                                                                                                                                                       |
| (Davies, 1982)             | 86                                | No statements present                                                                                                                                                                                                                                                                                                                                                                                                                                                                                                                                                                                                                                                                                                                                                                                                                                                                                                                                                                                                         | No information to extract                                                                                             | N              | N                     |                                                                                                                                                                       |
| (Dawood and Ramos, 1990)   | 87                                | Four subjects noticed muscle vibrations, change in stimulation with movements, tightness, headaches after use, and a slight redness or a burning sensation with TENS treatment. No mention of AEs in the Ibuprofen group                                                                                                                                                                                                                                                                                                                                                                                                                                                                                                                                                                                                                                                                                                                                                                                                      | Reported no adverse events                                                                                            | Y              | N = 0<br>TENS<br>ONLY | No numerical data for the comparison groups (placebo, ibuprofen)                                                                                                      |
| (De Angelis et al., 2003)  | 88                                | No differences in side effects were observed between TENS versus no TENS groups.<br>... the incidence of nausea was quite high in this patient sample as compared with other studies (group TENS, 8.5%; group No TENS, 11.3%) (11, 12), but this symptom was mentioned by the patient only when specifically elicited and it was probably the result of psychosomatic factors or emotional stress. However, shoulder pain was more frequent, albeit not significantly, in group TENS than in group Control (group A, 3%; group B, 0%). This is probably due to the fact that the examination lasted longer in group A than in group B (group A, 134.1 60 seconds; group B, 117 49 seconds; P .054) (using the same CO2 flow) and that the patients' acceptance of the procedure was higher with the use of the TENS device. It is completely safe, noninvasive, and free from any side effects ... as far as side effects are concerned, there were no statistically significant differences in favor of the TENS device..... | Coded as: Reported no adverse events<br><br>Extract data<br>AEs = Nausea and Shoulder pain but not attributed to pain | Y = 0<br>tally | N = 0<br>tally        | No data extracted<br><br>It is difficult to ascertain whether these symptoms were AEs or due to treatment intervention of surgical procedure<br><br>No data extracted |
| (De Giorgi et al., 2017)   | 89                                | No side effects were referred by the patients during the 10-week TENS treatment.                                                                                                                                                                                                                                                                                                                                                                                                                                                                                                                                                                                                                                                                                                                                                                                                                                                                                                                                              | Reported no adverse events                                                                                            | Y = 0<br>tally | N = 0<br>TENS<br>ONLY |                                                                                                                                                                       |
| (de Oliveira, 2012)        | 90                                | No statements present                                                                                                                                                                                                                                                                                                                                                                                                                                                                                                                                                                                                                                                                                                                                                                                                                                                                                                                                                                                                         | No information to extract                                                                                             | N              | N                     |                                                                                                                                                                       |
| (de Orange et al., 2003)   | 91                                | No statements present                                                                                                                                                                                                                                                                                                                                                                                                                                                                                                                                                                                                                                                                                                                                                                                                                                                                                                                                                                                                         | No information to extract                                                                                             | N              | N                     |                                                                                                                                                                       |
| (de Sousa et al., 2014)    | 92                                | No statements present                                                                                                                                                                                                                                                                                                                                                                                                                                                                                                                                                                                                                                                                                                                                                                                                                                                                                                                                                                                                         | No information to extract                                                                                             | N              | N                     |                                                                                                                                                                       |
| (DeSantana et al., 2008)   | 93                                | We reinforce that the absence of complications and adverse effects of TENS compared with conventional opioids and nonopioid analgesics makes TENS a safe and reliable therapeutic procedure.                                                                                                                                                                                                                                                                                                                                                                                                                                                                                                                                                                                                                                                                                                                                                                                                                                  | Reported no adverse events                                                                                            | Y = 0<br>tally | N = 0<br>TENS<br>ONLY |                                                                                                                                                                       |
| (DeSantana et al., 2009)   | 94                                | We conclude that the absence of complications and adverse effects of TENS compared with conventional opioids and nonopioid analgesics makes TENS a safe and reliable therapeutic procedure.                                                                                                                                                                                                                                                                                                                                                                                                                                                                                                                                                                                                                                                                                                                                                                                                                                   | Reported no adverse events                                                                                            | Y = 0<br>tally | N = 0<br>TENS<br>ONLY |                                                                                                                                                                       |
| (Dewan and Sharma, 2011)   | 95                                | No statements present                                                                                                                                                                                                                                                                                                                                                                                                                                                                                                                                                                                                                                                                                                                                                                                                                                                                                                                                                                                                         | No information to extract                                                                                             | N              | N                     |                                                                                                                                                                       |
| Deyo et al. (1990)         | Deyo ,<br>Wals<br>h <sup>96</sup> | Approximately one-third of the subjects reported minor skin irritation at the sites of electrode placement, with equal proportions in the true-TENS and sham-TENS groups.                                                                                                                                                                                                                                                                                                                                                                                                                                                                                                                                                                                                                                                                                                                                                                                                                                                     | Skin irritation.<br>One subject had to discontinue due to severe dermatitis.                                          | Y              | N                     | No numerical data                                                                                                                                                     |
| (Dibenedetto et al., 1993) | 97                                | Both treatments were well-tolerated and no side-effects reported.                                                                                                                                                                                                                                                                                                                                                                                                                                                                                                                                                                                                                                                                                                                                                                                                                                                                                                                                                             | Reported no adverse events                                                                                            | Y = 0<br>tally | N = 0<br>tally        |                                                                                                                                                                       |

| Reference                                       | Reference number                | Extracted Text                                                                                                                                                                                                                                                                                                                                                                                                                                              | AEs related to TENS                                | Statement   | Extractable Data | Comment                                                                                           |
|-------------------------------------------------|---------------------------------|-------------------------------------------------------------------------------------------------------------------------------------------------------------------------------------------------------------------------------------------------------------------------------------------------------------------------------------------------------------------------------------------------------------------------------------------------------------|----------------------------------------------------|-------------|------------------|---------------------------------------------------------------------------------------------------|
| (Dilekci et al., 2016)                          | <sup>98</sup>                   | No statements present                                                                                                                                                                                                                                                                                                                                                                                                                                       | No information to extract                          | N           |                  |                                                                                                   |
| (Dissanayaka et al., 2016)                      | <sup>99</sup>                   | No statements present                                                                                                                                                                                                                                                                                                                                                                                                                                       | No information to extract                          | N           | N                |                                                                                                   |
| (Dogu et al., 2008)                             | <sup>100</sup>                  | No statements present                                                                                                                                                                                                                                                                                                                                                                                                                                       | No information to extract                          | N           | N                |                                                                                                   |
| (Domaille and Reeves, 1997)                     | <sup>101</sup>                  | No statements present                                                                                                                                                                                                                                                                                                                                                                                                                                       | No information to extract                          | N           | N                |                                                                                                   |
| (Ebadi et al., 2018)                            | <sup>102</sup>                  | As for side effects, 8 patients in the Diadynamic group reported a burning sensation in the first 3-4 min of the treatment.                                                                                                                                                                                                                                                                                                                                 | Reported no adverse events in TENS group.          | Y           | N                | No numerical data for TENS                                                                        |
| (Ekblom and Hansson, 1987)                      | <sup>103</sup>                  | No statements present                                                                                                                                                                                                                                                                                                                                                                                                                                       | No information to extract                          | N           | N                |                                                                                                   |
| (Ekim et al., 2008)                             | <sup>104</sup>                  | No statements present                                                                                                                                                                                                                                                                                                                                                                                                                                       | No information to extract                          | N           | N                |                                                                                                   |
| (Elboim-Gabyzon et al., 2019)                   | <sup>105</sup>                  | No statements present                                                                                                                                                                                                                                                                                                                                                                                                                                       | No information to extract                          | N           | N                |                                                                                                   |
| (Elserty et al., 2016)                          | <sup>106</sup>                  | No statements present                                                                                                                                                                                                                                                                                                                                                                                                                                       | No information to extract                          | N           | N                |                                                                                                   |
| (Emmiler et al., 2008)                          | <sup>107</sup>                  | Post-op complications (atelectasia) were tabulated but not stated whether these were attributed to the intervention<br>TENS = 1/20(5%)<br>Placebo = 1/20(5%)<br>Control = 4/20 (20%)                                                                                                                                                                                                                                                                        | Reported adverse events (complication) atelectasis | Y           | N                | No data extracted – unclear whether ‘complications’ attributable to the treatment                 |
| (Engen et al., 2016)                            | <sup>108</sup>                  | No statements present                                                                                                                                                                                                                                                                                                                                                                                                                                       | No information to extract                          | N           | N                |                                                                                                   |
| (Erden and Senol Celik, 2015)                   | <sup>109</sup>                  | No statements present                                                                                                                                                                                                                                                                                                                                                                                                                                       | No information to extract                          | N           | N                |                                                                                                   |
| (Erdogan et al., 2005)                          | <sup>110</sup>                  | We did not observe any side effects using TENS, although we did not use TENS in patients who had cardiac disease.                                                                                                                                                                                                                                                                                                                                           | Reported no adverse events                         | Y = 0 tally | N = 0 TENS ONLY  |                                                                                                   |
| (Erkkola et al., 1980)                          | <sup>111</sup>                  | No statements present                                                                                                                                                                                                                                                                                                                                                                                                                                       | No information to extract                          | N           | N                |                                                                                                   |
| (Escortell-Mayor et al., 2011)                  | <sup>112</sup>                  | It is remarkable, as it is described in a publication done by this group, that no important adverse effects were observed from either therapy - Reported no adverse events <sup>112</sup> p70                                                                                                                                                                                                                                                               | Information to extract                             | Y           | Y                | Data extracted from secondary report <sup>113</sup> :<br>TENS = 7 events<br>Manual Therapy = 3    |
| Secondary Report (Escortell Mayor et al., 2008) | Secondary Report <sup>113</sup> | Translated from <sup>113</sup> p340<br>16.3% of treated patients with TENS (n = 7) and 6.4% of those treated with manual therapy (n = 3) reported adverse effects related to treatment. Three of them presented increased pain in the treated area and 1, general poor physical condition in the group treated with TENS Of those who received therapy manual, 1 patient referred a clinical worsening the first days and the rest did not detail symptoms. |                                                    |             |                  | The statement on AEs in <sup>112</sup> p70 appears to contradict data presented in <sup>113</sup> |
| (Esteban Gonzalez et al., 2015)                 | <sup>114</sup>                  | There were no complications, intolerances or other problems that required the intervention with TENS to be suspended in any of the 50 patients.                                                                                                                                                                                                                                                                                                             | Reported no adverse events                         | Y = 0 tally | N = 0 TENS ONLY  |                                                                                                   |
| (Eyigor et al., 2008)                           | <sup>115</sup>                  | No statements present                                                                                                                                                                                                                                                                                                                                                                                                                                       | No information to extract                          | N           | N                |                                                                                                   |



| Reference                    | Reference number | Extracted Text                                                                                                                                                                                                                                                        | AEs related to TENS                         | Statement   | Extractable Data | Comment                                                       |
|------------------------------|------------------|-----------------------------------------------------------------------------------------------------------------------------------------------------------------------------------------------------------------------------------------------------------------------|---------------------------------------------|-------------|------------------|---------------------------------------------------------------|
| (Eyigor et al., 2010)        | <sup>116</sup>   | No significant adverse event was reported in either of the two groups (p>0.05).                                                                                                                                                                                       | Reported no adverse events                  | Y = 0 tally | N = 0 tally      |                                                               |
| (Facci et al., 2011)         | <sup>117</sup>   | No statements present                                                                                                                                                                                                                                                 | No information to extract                   | N           | N                |                                                               |
| (Farahani et al., 2014)      | <sup>118</sup>   | No statements present                                                                                                                                                                                                                                                 | No information to extract                   | N           | N                |                                                               |
| (Farina et al., 2004)        | <sup>119</sup>   | No statements present                                                                                                                                                                                                                                                 | No information to extract                   | N           | N                |                                                               |
| (Fatima and Sarfraz, 2019)   | <sup>120</sup>   | No statements present                                                                                                                                                                                                                                                 | No information to extract                   | N           | N                |                                                               |
| (Ferreira and Moreira, 2009) | <sup>121</sup>   | No statements present                                                                                                                                                                                                                                                 | No information to extract                   | N           | N                |                                                               |
| (Ferreira et al., 2011)      | <sup>122</sup>   | No statements present                                                                                                                                                                                                                                                 | No information to extract                   | N           | N                |                                                               |
| (Ferreira et al., 2017)      | <sup>123</sup>   | No statements present                                                                                                                                                                                                                                                 | No information to extract                   | N           | N                | Dropouts reported but reasons not given                       |
| (Finsen et al., 1988)        | <sup>124</sup>   | No statements present                                                                                                                                                                                                                                                 | No information to extract                   | N           | N                |                                                               |
| (Fiorelli et al., 2012)      | <sup>125</sup>   | We did not observe any side effects; thus, TENS may be particularly useful for patients that have liver or kidney disease.....                                                                                                                                        | Reported no adverse events                  | Y = 0 tally | N = 0 tally      |                                                               |
| (Fodor-Sertl et al., 1990)   | <sup>126</sup>   | No statements present                                                                                                                                                                                                                                                 | No information to extract                   | N           | N                |                                                               |
| (Forogh et al., 2019)        | <sup>127</sup>   | No adverse events occurred and the rate of compliance to the exercise program was high in both groups                                                                                                                                                                 | Reported no adverse events                  | Y = 0 tally | N = 0 tally      |                                                               |
| (Forst et al., 2004)         | <sup>128</sup>   | No statements present                                                                                                                                                                                                                                                 | No information to extract                   | N           | N                |                                                               |
| (Forster et al., 1994)       | <sup>129</sup>   | No statements present                                                                                                                                                                                                                                                 | No information to extract                   | N           | N                |                                                               |
| (Fujii-Abe et al., 2019)     | <sup>130</sup>   | None of the study patients suffered any abnormal or harmful effects.                                                                                                                                                                                                  | Reported no adverse events                  | Y = 0 tally | N                |                                                               |
| (Galli et al., 2015)         | <sup>131</sup>   | No statements present                                                                                                                                                                                                                                                 | No information to extract                   | N           | N                |                                                               |
| (Galloway et al., 1984)      | <sup>132</sup>   | Only one of our patients demonstrated any adverse effects of the treatment in the form of an allergic rash with blistering which, in patter, was seen to correspond exactly with the areas of contact with the adhesive incorporated in the sterile wound electrodes. | Allergic skin irritation in one participant | Y           | N                | No numerical data                                             |
| (Garcia-Perez et al., 2018)  | <sup>133</sup>   | No statements present                                                                                                                                                                                                                                                 | No information to extract                   | N           | N                |                                                               |
| (Gerson et al., 1977)        | <sup>134</sup>   | No statements present                                                                                                                                                                                                                                                 | No information to extract                   | N           | N                |                                                               |
| (Ghoname et al., 1999a)      | <sup>135</sup>   | No statements present                                                                                                                                                                                                                                                 | No information to extract                   | N           | N                |                                                               |
| (Ghoname et al., 1999b)      | <sup>136</sup>   | No statements present                                                                                                                                                                                                                                                 | No information to extract                   | N           | N                |                                                               |
| (Gilbert et al., 1986)       | <sup>137</sup>   | No statements present                                                                                                                                                                                                                                                 | No information to extract                   | N           | N                |                                                               |
| (Grabiańska et al., 2015)    | <sup>138</sup>   | No statements present                                                                                                                                                                                                                                                 | No information to extract                   | N           | N                |                                                               |
| (Graff-Radford et al., 1989) | <sup>139</sup>   | No statements present                                                                                                                                                                                                                                                 | No information to extract                   | N           | N                | Patients were informed about possible side-effects beforehand |
| (Grant et al., 1999)         | <sup>140</sup>   | .....three TENS patients developed skin reactions. Other than these, reported side effects were minimal: three acupuncture patients reported dizziness and three TENS patients developed skin reactions.                                                              | Skin reactions in 3 participants            | Y           | Y                | Data extracted:<br>TENS = 3 events<br>Acupuncture = 3 events  |
| (Gregorini et al., 2010)     | <sup>141</sup>   | No statements present                                                                                                                                                                                                                                                 | No information to extract                   | N           | N                |                                                               |
| (Grimmer, 1992)              | <sup>142</sup>   | No statements present                                                                                                                                                                                                                                                 | No information to extract                   | N           | N                |                                                               |
| (Gschiel et al., 2010)       | <sup>143</sup>   | Overall, there were no side effects.                                                                                                                                                                                                                                  | Inferred no adverse events                  | Y           | N = 0 tally      | No numerical data                                             |

| Reference                     | Reference number | Extracted Text                                                                                                                                                                                                                                                                                                                                                                                          | AEs related to TENS                                                                                                  | Statement | Extractable Data | Comment                                                                                |
|-------------------------------|------------------|---------------------------------------------------------------------------------------------------------------------------------------------------------------------------------------------------------------------------------------------------------------------------------------------------------------------------------------------------------------------------------------------------------|----------------------------------------------------------------------------------------------------------------------|-----------|------------------|----------------------------------------------------------------------------------------|
| (Gunay Ucurum et al., 2018)   | <sup>144</sup>   | No statements present                                                                                                                                                                                                                                                                                                                                                                                   | No information to extract                                                                                            | N         | N                |                                                                                        |
| (Guo and Jia, 2005)           | <sup>145</sup>   | No statements present                                                                                                                                                                                                                                                                                                                                                                                   | No information to extract                                                                                            | N         | N                |                                                                                        |
| (Hamza et al., 1999)          | <sup>146</sup>   | ....16 -20% of the patients in each of the four groups complained that the TENS adversely influenced their quality of sleep because of the presence of the cutaneous electrodes and wires.                                                                                                                                                                                                              | Sleep interference because of electrodes/wires.                                                                      | Y         | N                | No numerical data for other groups                                                     |
| (Hanfy and El-Bigawy, 2004)   | <sup>147</sup>   | No statements present<br>During the study TENS therapy was safe and allowed the patients to remain ambulatory.                                                                                                                                                                                                                                                                                          | No information to extract                                                                                            | N         | N                | No specific comments on adverse events included                                        |
| (Hansson and Ekblom, 1983)    | <sup>148</sup>   | .... it should be noted that most patients found the muscle twitches produced by the low frequency TENS uncomfortable.                                                                                                                                                                                                                                                                                  | No information to extract                                                                                            | N         | N                | No specific comments on adverse events included                                        |
| (Hansson et al., 1986)        | <sup>149</sup>   | No statements present                                                                                                                                                                                                                                                                                                                                                                                   | No information to extract                                                                                            | N         | N                |                                                                                        |
| (Hargreaves and Lander, 1989) | <sup>150</sup>   | No statements present                                                                                                                                                                                                                                                                                                                                                                                   | No information to extract                                                                                            | N         | N                | Authors state that TENS is safe but no specific comments on side-effects in this study |
| (Harrison et al., 1986)       | <sup>151</sup>   | In the present study, like all others reported to-date, no side-effects were noted from the therapy.                                                                                                                                                                                                                                                                                                    | Reported no adverse events                                                                                           | Y         | N = 0 tally      | No numerical data                                                                      |
| (Hart et al., 2012)           | <sup>152</sup>   | No statements present                                                                                                                                                                                                                                                                                                                                                                                   | No information to extract                                                                                            | N         | N                |                                                                                        |
| (Hazneci et al., 2005)        | <sup>153</sup>   | No statements present                                                                                                                                                                                                                                                                                                                                                                                   | No information to extract                                                                                            | N         | N                |                                                                                        |
| (Herrera-Lasso et al., 1993)  | <sup>154</sup>   | No statements present                                                                                                                                                                                                                                                                                                                                                                                   | No information to extract                                                                                            | N         | N                |                                                                                        |
| (Hershman M, 1989)            | <sup>155</sup>   | No statements present                                                                                                                                                                                                                                                                                                                                                                                   | No information to extract                                                                                            | N         | N                |                                                                                        |
| (Hou et al., 2002)            | <sup>156</sup>   | No statements present                                                                                                                                                                                                                                                                                                                                                                                   | No information to extract                                                                                            | N         | N                |                                                                                        |
| (Hokenek et al., 2020)        | <sup>157</sup>   | No treatment-related skin reactions or unwanted effects were encountered during the trial. Of the verum group, 3 patients declined continuation of treatment due to intolerance to paresthesia, and 2 patients in the sham group declined to continue treatment due to intolerable pain. These patients opted to instead receive 0.75 mg/kg meperidine rescue therapy and were excluded from the trial. | Unclear whether these are adverse events or dislike of TENS sensation and worsening pain due to non response to sham | Y         | N                |                                                                                        |
| (Hruby et al., 2006)          | <sup>158</sup>   | No statements present                                                                                                                                                                                                                                                                                                                                                                                   | No information to extract                                                                                            | N         | N                |                                                                                        |
| (Hsieh et al., 1992)          | <sup>159</sup>   | No statements present<br>... One-shot TENS treatment may be recommended due to the rarity of side effects and its convenient application.                                                                                                                                                                                                                                                               | No information to extract                                                                                            | N         | N                |                                                                                        |
| (Hsueh et al., 1997)          | <sup>160</sup>   | No statements present                                                                                                                                                                                                                                                                                                                                                                                   | No information to extract                                                                                            | N         | N                |                                                                                        |
| (Hughes et al., 1988)         | <sup>161</sup>   | The use of TENS had no adverse effects upon the newborn                                                                                                                                                                                                                                                                                                                                                 | Reported no adverse events                                                                                           | Y         | N = 0 TENS ONLY  | No numerical data                                                                      |
| (Husch et al., 2020)          | <sup>162</sup>   | No statements present                                                                                                                                                                                                                                                                                                                                                                                   | No information to extract                                                                                            | N         | N                |                                                                                        |
| (Ilhanli, 2015)               | <sup>163</sup>   | There were no adverse events due to treatment regimens.                                                                                                                                                                                                                                                                                                                                                 | Reported no adverse events                                                                                           | Y         | N = 0            |                                                                                        |
| (Inal et al., 2016)           | <sup>164</sup>   | No statements present                                                                                                                                                                                                                                                                                                                                                                                   | No information to extract                                                                                            | N         | N                |                                                                                        |

| Reference                    | Reference number | Extracted Text                                                                                                                                                                                                                                                                                                                                                                                                                                           | AEs related to TENS           | Statement | Extractable Data   | Comment                                                                                                                                        |
|------------------------------|------------------|----------------------------------------------------------------------------------------------------------------------------------------------------------------------------------------------------------------------------------------------------------------------------------------------------------------------------------------------------------------------------------------------------------------------------------------------------------|-------------------------------|-----------|--------------------|------------------------------------------------------------------------------------------------------------------------------------------------|
| (Isik et al., 2017)          | <sup>165</sup>   | There were no serious side effects in both groups. In the TENS group no side effects were reported although 21 of the patients reported the treatment as boring due to the long hospital stay. In the leech therapy group, there was a mild local itching and skin redness in 31 patients (12 patients required topical antihistamine therapy) and severe local itching and reddening in 3 patients (requiring oral plus topical antihistamine therapy). | Reported no adverse events    | Y         | Y                  | TENS = 0 events / 53 participants<br>Leech = 34 events / 52 participants                                                                       |
| (Jaafarpour et al., 2008)    | <sup>166</sup>   | No statements present                                                                                                                                                                                                                                                                                                                                                                                                                                    | No information to extract     | N         | N                  |                                                                                                                                                |
| (Jamison et al., 2019)       | <sup>167</sup>   | None of the participants reported experiencing any long-term adverse effects from using the hfTENS.                                                                                                                                                                                                                                                                                                                                                      | Reported no adverse events    | Y         | N = 0<br>TENS ONLY | No numerical data                                                                                                                              |
| (Jarzem et al., 2005)        | <sup>168</sup>   | No statements present                                                                                                                                                                                                                                                                                                                                                                                                                                    | No information to extract     | N         | N                  |                                                                                                                                                |
| (Jensen et al., 1985)        | <sup>169</sup>   | No statements present                                                                                                                                                                                                                                                                                                                                                                                                                                    | No information to extract     | N         | N                  |                                                                                                                                                |
| (Jensen et al., 1991)        | <sup>170</sup>   | No statements present                                                                                                                                                                                                                                                                                                                                                                                                                                    | No information to extract     | N         | N                  |                                                                                                                                                |
| (Jones and Hutchinson, 1991) | <sup>171</sup>   | Three patients complained of dizziness after Entonox inhalation. There were no other side-effects of any of the treatments. TENS produced no side-effects, is easier to handle and was subjectively preferred by the patients.                                                                                                                                                                                                                           | Reported no adverse events    | Y         | N = 0              | No data extracted<br>Multiple cross over study with possibility of contamination between treatments                                            |
| (Kara et al., 2011)          | <sup>172</sup>   | Furthermore, there were no adverse effects or negative results related to TENS application.                                                                                                                                                                                                                                                                                                                                                              | Reported no adverse events    | Y         | N = 0<br>TENS ONLY | No numerical data                                                                                                                              |
| (Kararmaz et al., 2004)      | <sup>173</sup>   | TENS is a non-invasive, safe, and simple treatment method, which does not have any systemic side effects. We did not observe any difficulties in the use of TENS. NOTE: Table 4 records side effects associated with ESWL procedure as an efficacy measure                                                                                                                                                                                               | Reported no adverse events    | Y         | N = 0<br>TENS ONLY | No numerical data associated with AEs due to treatment interventions under study<br><br>The only side-effects reported were medication-induced |
| (Kayman-Kose et al., 2014)   | <sup>174</sup>   | No adverse effects due to TENS occurred during the study period - for both Cesarean and vaginal delivery data                                                                                                                                                                                                                                                                                                                                            | Reported no adverse events    | Y         | N = 0<br>TENS ONLY | No numerical data                                                                                                                              |
| (Keskin et al., 2012)        | <sup>175</sup>   | No adverse effect of TENS application on pregnant women was observed during the study.                                                                                                                                                                                                                                                                                                                                                                   | Reported no adverse events    | Y         | N                  | No numerical data for comparison group                                                                                                         |
| (Kibar et al., 2020)         | <sup>176</sup>   | No statements present                                                                                                                                                                                                                                                                                                                                                                                                                                    | No information to extract     | N         | N                  |                                                                                                                                                |
| (Kim et al., 2012)           | <sup>177</sup>   | There were no significant differences in the incidences of side effects such as erythema and itching between the groups ( $P > 0.05$ ). TENS Group 7/50 (14%) had erythema and 1/50 (2%) had itching. Table II of their report                                                                                                                                                                                                                           | Erythema and itching.         | Y         | Y                  | Data extracted:<br>TENS = 8 events / 50 participants<br>Placebo = 7 / 50 participants                                                          |
| (Kim et al., 2014)           | <sup>178</sup>   | No major adverse effects were reported by participants in any treatment group. One patient in the monotherapy group, one patient in the TENS+Np group, and one patient in the CAP+Np group experienced skin itching. One patient in the TENS+Np group and one patient in the HEAT+Np group                                                                                                                                                               | Itching and sleep disturbance | Y         | Y                  | Data extracted (skin itching):<br>TENS + NSAID patch = 1 event / 24 participants                                                               |

| Reference                     | Reference number | Extracted Text                                                                                                                                                                                                                                                                                                                                                                                                                                                                                                                                                                                                                                                                                                                               | AEs related to TENS                              | Statement   | Extractable Data | Comment                                                                                                                                                                                                                                                                                                           |
|-------------------------------|------------------|----------------------------------------------------------------------------------------------------------------------------------------------------------------------------------------------------------------------------------------------------------------------------------------------------------------------------------------------------------------------------------------------------------------------------------------------------------------------------------------------------------------------------------------------------------------------------------------------------------------------------------------------------------------------------------------------------------------------------------------------|--------------------------------------------------|-------------|------------------|-------------------------------------------------------------------------------------------------------------------------------------------------------------------------------------------------------------------------------------------------------------------------------------------------------------------|
|                               |                  | reported sleep disturbance. Light somnolence was reported by one patient in the monotherapy group. However, all adverse effects had spontaneously resolved by the end of this study without any treatment. Participants' vital signs were in the normal                                                                                                                                                                                                                                                                                                                                                                                                                                                                                      |                                                  |             |                  | NSAID patch alone = 1 event / 25 participants                                                                                                                                                                                                                                                                     |
| (Kirupa et al., 2019)         | 179              | No statements present                                                                                                                                                                                                                                                                                                                                                                                                                                                                                                                                                                                                                                                                                                                        | No information to extract                        | N           | N                |                                                                                                                                                                                                                                                                                                                   |
| (Knobel et al., 2005)         | 180              | In this survey, more than 50% of women reported some discomfort in the use of electrodes type SSP and 25% in the use of electrodes plate type (Tab. 4). In the application of stimulation, no woman reported discomfort in none of the study groups. To assess the effectiveness of this care, therefore, research is needed to reveal the woman's opinion about the method                                                                                                                                                                                                                                                                                                                                                                  | Discomfort during stimulation                    | Y           | N                | No data extracted<br>Discomfort was an outcome measure – comparing two TENS electrodes.<br>We did not consider discomfort as an adverse event in this study                                                                                                                                                       |
| (Koca et al., 2014)           | 181              | No serious complication was associated with the treatments in any group, and all patients generally tolerated the treatments well. Only two patients in the TENS group experienced mild tenderness at the application site.                                                                                                                                                                                                                                                                                                                                                                                                                                                                                                                  | Mild tenderness                                  | Y           | N                | No numerical data                                                                                                                                                                                                                                                                                                 |
| (Kofotolis et al., 2008)      | 182              | No statements present                                                                                                                                                                                                                                                                                                                                                                                                                                                                                                                                                                                                                                                                                                                        | No information to extract                        |             | N                |                                                                                                                                                                                                                                                                                                                   |
| (Koke et al., 2004)           | 183              | During the first period, skin irritation occurred in 9.4% (17/180) of all patients, adherence problems of electrodes in 12.2% (22/180) and problems attaching electrodes in 2.2% (4/180). In four patients, the adverse effects resulted in withdrawal from the study (skin-irritation 2X, problems attaching electrodes 2 X). During the second period, skin irritation was reported by 5.8% (10/171), adherence problems of electrodes 4.7% (8/171), and problems attaching electrodes body 2.9% (5/171). No significant differences in adverse effects were found between groups. At 6 months follow-up, 6 patients (3 in HFT-COT group and 3 in HIT-COT group) reported skin irritation due to TENS, but still could use TENS regularly. | Skin irritation<br>Problems attaching electrodes | Y           | N                | Could not extract data at 6 months follow-up (skin irritation) because could not ascertain the number of participants remaining in each group<br><br>High frequency TENS = 3 events<br>High intensity = 3<br><br>Cross-over study whereby all participants received an active TENS for all possible interventions |
| (Korkmaz et al., 2010)        | 184              | No serious side-effects or complications were observed in either of the two groups ( $P>0.05$ ).                                                                                                                                                                                                                                                                                                                                                                                                                                                                                                                                                                                                                                             | Reported no adverse events                       | Y = 0 tally | N = 0 tally      | No numerical data                                                                                                                                                                                                                                                                                                 |
| (Kumar and Raj, 2014)         | 185              | No statements present                                                                                                                                                                                                                                                                                                                                                                                                                                                                                                                                                                                                                                                                                                                        | No information to extract                        | N           | N                |                                                                                                                                                                                                                                                                                                                   |
| (Labrecque et al., 1999)      | 186              | No statements present                                                                                                                                                                                                                                                                                                                                                                                                                                                                                                                                                                                                                                                                                                                        | No information to extract                        | N           | N                |                                                                                                                                                                                                                                                                                                                   |
| (Laitinen and Nuutinen, 1991) | 187              | No statements present                                                                                                                                                                                                                                                                                                                                                                                                                                                                                                                                                                                                                                                                                                                        | No information to extract                        | N           | N                |                                                                                                                                                                                                                                                                                                                   |
| (Lang et al., 2007)           | 188              | Because of its simple use and lack of side effects in our study population, we can recommend this technique for pain therapy.                                                                                                                                                                                                                                                                                                                                                                                                                                                                                                                                                                                                                | Reported no adverse events                       | Y           | N = 0 TENS ONLY  | No numerical data                                                                                                                                                                                                                                                                                                 |

| Reference                      | Reference number | Extracted Text                                                                                                                                                                                                                                                                                    | AEs related to TENS                        | Statement   | Extractable Data | Comment                                                                                                                                                                                                                                              |
|--------------------------------|------------------|---------------------------------------------------------------------------------------------------------------------------------------------------------------------------------------------------------------------------------------------------------------------------------------------------|--------------------------------------------|-------------|------------------|------------------------------------------------------------------------------------------------------------------------------------------------------------------------------------------------------------------------------------------------------|
| (Langley et al., 1984)         | <sup>189</sup>   | No adverse side-effects were reported by patients receiving TNS or placebo.                                                                                                                                                                                                                       | Reported no adverse events                 | Y = 0 tally | N = 0 tally      |                                                                                                                                                                                                                                                      |
| (Lauretti et al., 2013)        | <sup>190</sup>   | Concerning adverse effects, 2 patients from the STG got in sleep after the device application and complained of muscle sore due to more than 70-min active device application, which was subsequently improved by local hot application.                                                          | Muscle soreness in TENS group (2 patients) | Y           | N                | Note: the poor English in the quotation is how the text was written!                                                                                                                                                                                 |
| (Lauretti et al., 2015)        | <sup>191</sup>   | In conclusion, the portable TENS device demonstrated to be efficacious for pain relief and improvement of quality of life with no adverse effects for control of menstruation cramp pain.                                                                                                         | Reported no adverse events                 | Y           | N = 0 TENS ONLY  |                                                                                                                                                                                                                                                      |
| (Law and Cheing, 2004)         | <sup>192</sup>   | No statements present                                                                                                                                                                                                                                                                             | No information to extract                  | N           | N                |                                                                                                                                                                                                                                                      |
| (Law et al., 2004)             | <sup>193</sup>   | No statements present                                                                                                                                                                                                                                                                             | No information to extract                  | N           | N                |                                                                                                                                                                                                                                                      |
| (Leandri et al., 1990)         | <sup>194</sup>   | No statements present                                                                                                                                                                                                                                                                             | No information to extract                  | N           | N                |                                                                                                                                                                                                                                                      |
| (Lee et al., 1990)             | <sup>195</sup>   | No negative effects on the mothers and babies were reported.                                                                                                                                                                                                                                      | Reported no adverse events                 | Y = 0 tally | N = 0 tally      |                                                                                                                                                                                                                                                      |
| (Lee et al., 2015)             | <sup>196</sup>   | Neither expected nor unexpected AEs occurred in the study and control groups.                                                                                                                                                                                                                     | Reported no adverse events                 | Y = 0 tally | N = 0 tally      |                                                                                                                                                                                                                                                      |
| (Lee et al., 2019)             | <sup>197</sup>   | No statements present                                                                                                                                                                                                                                                                             | No information to extract                  | N           | N                |                                                                                                                                                                                                                                                      |
| (Leo et al., 1986)             | <sup>198</sup>   | No statements present                                                                                                                                                                                                                                                                             | No information to extract                  | N           | N                |                                                                                                                                                                                                                                                      |
| (Leonard et al., 2011)         | <sup>199</sup>   | No statements present                                                                                                                                                                                                                                                                             | No information to extract                  | N           | N                |                                                                                                                                                                                                                                                      |
| (Lewers et al., 1989)          | <sup>200</sup>   | No statements present                                                                                                                                                                                                                                                                             | No information to extract                  | N           | N                |                                                                                                                                                                                                                                                      |
| (Lewis et al., 1984)           | <sup>201</sup>   | No statements present                                                                                                                                                                                                                                                                             | No information to extract                  | N           | N                | One patient dropped out because of worsening pain.                                                                                                                                                                                                   |
| (Lewis et al., 1994)           | <sup>202</sup>   | No statements present                                                                                                                                                                                                                                                                             | No information to extract                  | N           | N                |                                                                                                                                                                                                                                                      |
| (Likar et al., 2001)           | <sup>203</sup>   | The side effects 1 patient in the Verum group about vomiting, 5 patients in the placebo group suffered from nausea and vomiting that are considered easy and were classified as medium.<br>TENS + analgesics = 1 event / 11 participants<br>Placebo TENS + analgesics = 5 event / 12 participants |                                            | Y           | N                | Data related to nausea and vomiting. Debatably this is related to AE associated with post op drugs rather than TENS.<br>We decided not to extract this data because nausea and vomiting AE of drugs reflects efficacy of TENS rather than AE of TENS |
| (Lim et al., 1983)             | <sup>204</sup>   | No statements present                                                                                                                                                                                                                                                                             | No information to extract                  | N           | N                |                                                                                                                                                                                                                                                      |
| (Lima et al., 2011)            | <sup>205</sup>   | No statements present                                                                                                                                                                                                                                                                             | No information to extract                  | N           | N                |                                                                                                                                                                                                                                                      |
| (Limoges and Rickabaugh, 2004) | <sup>206</sup>   | In addition, no adverse events secondary to TENS use or procedural complications occurred.                                                                                                                                                                                                        | Reported no adverse events                 | Y           | N = 0 TENS ONLY  | No numerical data                                                                                                                                                                                                                                    |
| (Lin et al., 2015)             | <sup>207</sup>   | No statements present                                                                                                                                                                                                                                                                             | No information to extract                  | N           | N                |                                                                                                                                                                                                                                                      |
| (Lin et al., 2019)             | <sup>208</sup>   | First, there were no adverse events (such as discomfort, hematoma, injury, or hyperalgesia) throughout this study.                                                                                                                                                                                | Reported no adverse events                 | Y = 0 tally | N = 0 tally      |                                                                                                                                                                                                                                                      |

| Reference                       | Reference number | Extracted Text                                                                                                                                                                                                                                                                                                                                                                                                                                                                      | AEs related to TENS                                 | Statement   | Extractable Data | Comment                                                                                                            |
|---------------------------------|------------------|-------------------------------------------------------------------------------------------------------------------------------------------------------------------------------------------------------------------------------------------------------------------------------------------------------------------------------------------------------------------------------------------------------------------------------------------------------------------------------------|-----------------------------------------------------|-------------|------------------|--------------------------------------------------------------------------------------------------------------------|
| (Linde et al., 1995)            | <sup>209</sup>   | The most common side effect during TENS treatment is some type of hypersensitivity reaction of the skin. It was mostly seen in slightly underweight patients, in whom contact between skin and electrode was not at its maximum, especially in the area of the TMJ                                                                                                                                                                                                                  | Skin reaction (no other details)                    | Y           | N                | No numerical data                                                                                                  |
| (Linn et al., 1999)             | <sup>210</sup>   | No statements present                                                                                                                                                                                                                                                                                                                                                                                                                                                               | No information to extract                           | N           | N                |                                                                                                                    |
| (Lison et al., 2017)            | <sup>211</sup>   | No patients in either the active or placebo TENS groups reported adverse events such as skin allergy, pain, or burning at the electrode site.                                                                                                                                                                                                                                                                                                                                       | Reported no adverse events                          | Y = 0 tally | N = 0 tally      |                                                                                                                    |
| (Liu et al., 1985)              | <sup>212</sup>   | No statements present                                                                                                                                                                                                                                                                                                                                                                                                                                                               | No information to extract                           | N           | N                |                                                                                                                    |
| (Liu et al., 2017)              | <sup>213</sup>   | During treatment, only 1 patient in the 2-Hz tONS group reported an adverse event. This was intolerance to a form of pinch pain induced by electrical stimulation. However, when the intensity of stimulation was reduced from 10 to 9 mA, the uncomfortable feeling subsided. In the TPM group, 9 of 22 patients experienced (mostly mild) paresthesia, especially of the hands and feet. No other adverse events were reported. tONS = transcutaneous occipital nerve stimulation | Pain at 10mA. Pain lessened when intensity reduced. | Y           | Y                | Data extracted<br>TENS = 1 event / 22 - Pinch pain<br>Topiramate = 9 / 22 - Mild paraesthesia of hands             |
| (Lofgren and Norrbrink, 2009)   | <sup>214</sup>   | In this study few side-effects were reported. Three patients reported increased pain, 2 after TENS and one after warmth.                                                                                                                                                                                                                                                                                                                                                            | Increased pain in 2 patients                        | Y           | Y                | Data extracted (increased pain)<br>TENS = 2 events / 32 participants<br>Warmth therapy = 1 event / 32 participants |
| (Luchesa et al., 2009)          | <sup>215</sup>   | No statements present                                                                                                                                                                                                                                                                                                                                                                                                                                                               | No information to extract                           | N           | N                |                                                                                                                    |
| (Lundeberg, 1984)               | <sup>216</sup>   | No statements present                                                                                                                                                                                                                                                                                                                                                                                                                                                               | No information to extract                           | N           | N                |                                                                                                                    |
| (Lundeberg et al., 1985)        | <sup>217</sup>   | No statements present                                                                                                                                                                                                                                                                                                                                                                                                                                                               | No information to extract                           | N           | N                |                                                                                                                    |
| (Machado et al., 2019)          | <sup>218</sup>   | No statements present                                                                                                                                                                                                                                                                                                                                                                                                                                                               | No information to extract                           | N           | N                |                                                                                                                    |
| (Machin et al., 1988)           | <sup>219</sup>   | No statements present                                                                                                                                                                                                                                                                                                                                                                                                                                                               | No information to extract                           | N           | N                |                                                                                                                    |
| (Mahure et al., 2017)           | <sup>220</sup>   | No TENS machine-related complication, such as localized pain or erythema at the electrode site, occurred in either group of patients.                                                                                                                                                                                                                                                                                                                                               | Reported no adverse events                          | Y           | N = 0 Tally      | No numerical data despite clear statement of no events in both groups                                              |
| (Manigandan et al., 2014)       | <sup>221</sup>   | No statements present                                                                                                                                                                                                                                                                                                                                                                                                                                                               | No information to extract                           | N           | N                |                                                                                                                    |
| (Mannheimer and Carlsson, 1979) | <sup>222</sup>   | No side effects were observed.                                                                                                                                                                                                                                                                                                                                                                                                                                                      | Reported no adverse events                          | Y = 0 tally | N = 0 tally      |                                                                                                                    |
| (Mannheimer and Whalen, 1985)   | <sup>223</sup>   | No statements present                                                                                                                                                                                                                                                                                                                                                                                                                                                               | No information to extract                           | N           | N                |                                                                                                                    |
| (Mannheimer et al., 1978)       | <sup>224</sup>   | No side effects of the treatment were observed. One patient reported that when the pain recurred it was more severe than before TNS, however.                                                                                                                                                                                                                                                                                                                                       | Pain recurred more severe than before TNS           | Y           | N                |                                                                                                                    |
| (Mannheimer et al., 1985)       | <sup>225</sup>   | One patient in the treatment group was excluded because of skin irritation from the electrodes....                                                                                                                                                                                                                                                                                                                                                                                  | Skin irritation                                     | Y           | N                |                                                                                                                    |
| (Mansourian et al., 2019)       | <sup>226</sup>   | No statements present                                                                                                                                                                                                                                                                                                                                                                                                                                                               | No information to extract                           | N           | N                |                                                                                                                    |
| (Mansuri et al., 2019)          | <sup>227</sup>   | No statements present                                                                                                                                                                                                                                                                                                                                                                                                                                                               | No information to extract                           | N           | N                |                                                                                                                    |
| (Mansuri et al., 2020)          | <sup>228</sup>   | No statements present                                                                                                                                                                                                                                                                                                                                                                                                                                                               | No information to extract                           | N           | N                |                                                                                                                    |
| (Marchand et al., 1993)         | <sup>229</sup>   | No statements present                                                                                                                                                                                                                                                                                                                                                                                                                                                               | No information to extract                           | N           | N                |                                                                                                                    |

| Reference                 | Reference number | Extracted Text                                                                                                                                                                                                                                                                                                                                                                                                                                                                                                                                                                                                                                                                                                            | AEs related to TENS                           | Statement   | Extractable Data | Comment                                                                                                                                                             |
|---------------------------|------------------|---------------------------------------------------------------------------------------------------------------------------------------------------------------------------------------------------------------------------------------------------------------------------------------------------------------------------------------------------------------------------------------------------------------------------------------------------------------------------------------------------------------------------------------------------------------------------------------------------------------------------------------------------------------------------------------------------------------------------|-----------------------------------------------|-------------|------------------|---------------------------------------------------------------------------------------------------------------------------------------------------------------------|
| (Mascarin et al., 2012)   | <sup>230</sup>   | No statements present                                                                                                                                                                                                                                                                                                                                                                                                                                                                                                                                                                                                                                                                                                     | No information to extract                     | N           | N                |                                                                                                                                                                     |
| (McCallum et al., 1988)   | <sup>231</sup>   | No statements present                                                                                                                                                                                                                                                                                                                                                                                                                                                                                                                                                                                                                                                                                                     | No information to extract                     | N           | N                |                                                                                                                                                                     |
| (Melzack et al., 1983)    | <sup>232</sup>   | No statements present                                                                                                                                                                                                                                                                                                                                                                                                                                                                                                                                                                                                                                                                                                     | No information to extract                     | N           | N                |                                                                                                                                                                     |
| (Merrill, 1989)           | <sup>233</sup>   | No statements present                                                                                                                                                                                                                                                                                                                                                                                                                                                                                                                                                                                                                                                                                                     | No information to extract                     | N           | N                |                                                                                                                                                                     |
| (Miller et al., 2007)     | <sup>234</sup>   | No statements present                                                                                                                                                                                                                                                                                                                                                                                                                                                                                                                                                                                                                                                                                                     | No information to extract                     | N           | N                |                                                                                                                                                                     |
| (Milsom et al., 1994)     | <sup>235</sup>   | Ten of the 12 women considered the high-intensity transcutaneous nerve stimulation to be painful. However, stimulation lasted only a few seconds, and all the women were prepared to accept again this short period of pain to obtain pain relief from dysmenorrhea.                                                                                                                                                                                                                                                                                                                                                                                                                                                      | Painful at high-intensity stimulation         | Y           | N                |                                                                                                                                                                     |
| (Moharic et al., 2009)    | <sup>236</sup>   | As already indicated in the Methods section, three patients in the pregabalin group experienced such severe somnolence and dizziness that they had to withdraw from the study. Complaints in the combined group beside somnolence and dizziness included peripheral oedema, weight gain, elevated blood glucose values and withdrawal headache, while one patient from the combined group withdrew from the study because of a traffic accident (tractor overturning) caused by somnolence induced (with all likelihood) by pregabalin. In the TENS group, none of the patients reported any local or systemic side effects, neither did they report any problems with continuous TENS application for three hours daily. | Reported no adverse events                    | Y           | Y                | Data extracted (severe somnolence and dizziness)<br>TENS = 0 events / 46 participants<br>Pregabalin alone = 3 events / 8 participants resulting in study withdrawal |
| (Mondal et al., 2019)     | <sup>237</sup>   | No statements present                                                                                                                                                                                                                                                                                                                                                                                                                                                                                                                                                                                                                                                                                                     | No information to extract                     | N           | N                |                                                                                                                                                                     |
| (Moore and Shurman, 1997) | <sup>238</sup>   | No adverse treatment effects were reported and no subject reported the addition of any new pain medication, physical therapy, or other pain-related treatment during the course of their study participation.                                                                                                                                                                                                                                                                                                                                                                                                                                                                                                             | Reported no adverse events                    | Y = 0 tally | N = 0 tally      |                                                                                                                                                                     |
| (Mora et al., 2006)       | <sup>239</sup>   | We can recommend this technique due to its simple use and the lack of side effects in our study population.                                                                                                                                                                                                                                                                                                                                                                                                                                                                                                                                                                                                               | Reported no adverse events                    | Y = 0 tally | N = 0 TENS ONLY  |                                                                                                                                                                     |
| (Morgan et al., 1996)     | <sup>240</sup>   | No statements present                                                                                                                                                                                                                                                                                                                                                                                                                                                                                                                                                                                                                                                                                                     | No information to extract                     | N           | N                |                                                                                                                                                                     |
| (Møystad et al., 1990)    | <sup>241</sup>   | No statements present.<br>TNS may have advantages as a non-invasive method with few side effects that is simple to administer for the patients themselves.                                                                                                                                                                                                                                                                                                                                                                                                                                                                                                                                                                | No information to extract                     | N           | N                |                                                                                                                                                                     |
| (Murray et al., 2004)     | <sup>242</sup>   | No statements present                                                                                                                                                                                                                                                                                                                                                                                                                                                                                                                                                                                                                                                                                                     | No information to extract                     | N           | N                |                                                                                                                                                                     |
| (Mutlu et al., 2013)      | <sup>243</sup>   | No statements present                                                                                                                                                                                                                                                                                                                                                                                                                                                                                                                                                                                                                                                                                                     | No information to extract                     | N           | N                | There were dropouts to follow-up but no explanation for these.                                                                                                      |
| (Nabi et al., 2015)       | <sup>244</sup>   | The therapeutic methods studied here were well tolerated were not associated with any serious adverse effects. However, skin irritation was reported in a few TENS group subjects.                                                                                                                                                                                                                                                                                                                                                                                                                                                                                                                                        | Skin irritation                               | Y           | N                | No numerical data                                                                                                                                                   |
| (Nash et al., 1990)       | <sup>245</sup>   | The only side effected noted in the series were occasional skin rashes due to allergy to the electrode jelly or fixing tape, and occasional patients had transient increase in pain which settled to previous levels with cessation of treatment.                                                                                                                                                                                                                                                                                                                                                                                                                                                                         | Skin irritation<br>Transient increase in pain | Y           | N                | No numerical data                                                                                                                                                   |

| Reference                                                                                             | Reference number                        | Extracted Text                                                                                                                                                                                                                                                                                                                                                                                                                                                                                                                                                                                 | AEs related to TENS                                                                 | Statement   | Extractable Data | Comment                                                                            |
|-------------------------------------------------------------------------------------------------------|-----------------------------------------|------------------------------------------------------------------------------------------------------------------------------------------------------------------------------------------------------------------------------------------------------------------------------------------------------------------------------------------------------------------------------------------------------------------------------------------------------------------------------------------------------------------------------------------------------------------------------------------------|-------------------------------------------------------------------------------------|-------------|------------------|------------------------------------------------------------------------------------|
| (Navarathnam et al., 1984)                                                                            | <sup>246</sup>                          | Some of the patients in both groups developed blisters around the electrode edges in the distribution of the adhesives. In addition, two patients developed small areas of pressure necrosis in the region of the lumbosacral electrodes which might be avoided by more attention to posture of the patients with these electrodes.                                                                                                                                                                                                                                                            | Skin irritation<br>Lumbosacral pressure necrosis                                    | Y           | N                | No numerical data                                                                  |
| (Neary, 1981)                                                                                         | <sup>247</sup>                          | No cases of infection or skin reaction were observed. TENS did not mask the pain symptoms from complications.                                                                                                                                                                                                                                                                                                                                                                                                                                                                                  | Reported no adverse events                                                          | Y = 0 tally | N = 0 tally      |                                                                                    |
| (Neighbours et al., 1987)                                                                             | <sup>248</sup>                          | No statements present                                                                                                                                                                                                                                                                                                                                                                                                                                                                                                                                                                          | No information to extract                                                           | N           | N                |                                                                                    |
| (Nesheim, 1981)                                                                                       | <sup>249</sup>                          | No statements present                                                                                                                                                                                                                                                                                                                                                                                                                                                                                                                                                                          | No information to extract                                                           | N           | N                |                                                                                    |
| (Neumark et al., 1978)                                                                                | <sup>250</sup>                          | No statements present                                                                                                                                                                                                                                                                                                                                                                                                                                                                                                                                                                          | No information to extract                                                           | N           | N                |                                                                                    |
| (Ng et al., 2003)                                                                                     | <sup>251</sup>                          | No statements present                                                                                                                                                                                                                                                                                                                                                                                                                                                                                                                                                                          | No information to extract                                                           | N           | N                |                                                                                    |
| (Nordemar and Thorner, 1981)                                                                          | <sup>252</sup>                          | No statements present                                                                                                                                                                                                                                                                                                                                                                                                                                                                                                                                                                          | No information to extract                                                           | N           | N                |                                                                                    |
| (Norrbrink, 2009)                                                                                     | <sup>253</sup>                          | Three patients experienced discomfort or increased pain during treatment, and one patient experienced local muscle spasms.                                                                                                                                                                                                                                                                                                                                                                                                                                                                     | Increased pain during treatment<br>Local muscle spasms                              | Y           | N                | No numerical data<br>Unclear which group experienced side effects                  |
| (Olsén et al., 2007)                                                                                  | <sup>254</sup>                          | No adverse effects except for discomfort during stimulation were recorded. Discomfort from the stimulation itself was greater in the HI TENS group than in the LI TENS group (pB/0.01). In the HI TENS group, two women experienced severe discomfort, two women experienced moderate discomfort, five women experienced mild discomfort, and two women experienced no discomfort. Seven women in the LI TENS group experienced no discomfort and one woman experienced mild discomfort from the stimulation given. No adverse effects except for discomfort during stimulation were recorded. | Discomfort during stimulation                                                       | Y           | N                | No numerical data other than stimulation discomfort<br>Decided not to extract this |
| (Fagevik Olsen et al., 2019)                                                                          | <sup>255</sup>                          | No statements present                                                                                                                                                                                                                                                                                                                                                                                                                                                                                                                                                                          | No information to extract                                                           | N           | N                | Dropouts recorded but reasons not given                                            |
| (Oncel et al., 2002)                                                                                  | <sup>256</sup>                          | No complications due to TENS therapy or Naproxen sodium were seen during the study.                                                                                                                                                                                                                                                                                                                                                                                                                                                                                                            | Reported no adverse events                                                          | Y = 0 tally | N = 0 tally      |                                                                                    |
| (Oosterhof et al., 2006)                                                                              | <sup>257</sup>                          | No statements present in <sup>257</sup> .<br>No statements present in secondary report <sup>259</sup>                                                                                                                                                                                                                                                                                                                                                                                                                                                                                          | Skin irritation                                                                     | Y           | N                | No numerical data                                                                  |
| Secondary reports<br>(Oosterhof et al., 2008,<br>Oosterhof et al., 2012a,<br>Oosterhof et al., 2012b) | Secondary reports<br><sup>258-260</sup> | Secondary report - <sup>260</sup><br>Skin irritation occurred at some time point in half of the patients but could easily be cured by changing the type of electrode, except for 4 patients who had to stop treatment. Because there was no difference between TENS and sham TENS, we assume there was no interaction of the electric current with electrode material, which has been suggested.                                                                                                                                                                                               |                                                                                     |             |                  |                                                                                    |
| (Ordog, 1987)                                                                                         | <sup>261</sup>                          | No complications of treatment were found. No side effects were reported, except a mild tingling sensation at higher TENS-PAC® output levels.                                                                                                                                                                                                                                                                                                                                                                                                                                                   | Reported no adverse events<br>Mild tingling sensation is part of the TENS treatment | Y = 0 tally | N = 0 TENS ONLY  |                                                                                    |



| Reference                                                                | Reference number                                     | Extracted Text                                                                                                                                                                                                                                                                                                                                    | AEs related to TENS                      | Statement   | Extractable Data | Comment                                                                                         |
|--------------------------------------------------------------------------|------------------------------------------------------|---------------------------------------------------------------------------------------------------------------------------------------------------------------------------------------------------------------------------------------------------------------------------------------------------------------------------------------------------|------------------------------------------|-------------|------------------|-------------------------------------------------------------------------------------------------|
|                                                                          |                                                      | Overall, 20% of the patients reported this effect, but none had to discontinue usage of the TENS-PAC® because of it.                                                                                                                                                                                                                              |                                          |             |                  |                                                                                                 |
| (Ozkaraoglu et al., 2020)                                                | <sup>262</sup>                                       | No statements present                                                                                                                                                                                                                                                                                                                             | No information to extract                | N           | N                |                                                                                                 |
| (Ozkul et al., 2015)                                                     | <sup>263</sup>                                       | No unwanted effects occurred during the application of both treatments.                                                                                                                                                                                                                                                                           | Reported no adverse events               | Y = 0 tally | N = 0 tally      |                                                                                                 |
| (Oztas and Iyigun, 2019)                                                 | <sup>264</sup>                                       | No statements present                                                                                                                                                                                                                                                                                                                             | No information to extract                | N           | N                |                                                                                                 |
| (Ozturk et al., 2016)                                                    | <sup>265</sup>                                       | No statements present                                                                                                                                                                                                                                                                                                                             | No information to extract                | N           | N                |                                                                                                 |
| (Padma et al., 2000)                                                     | <sup>266</sup>                                       | In the present study, no side effects were noted, and the stimulation was acceptable to all the patients, but the willingness to accept TENS as a mode of relief was equivocal.                                                                                                                                                                   | Reported no adverse events               | Y = 0 tally | N = 0 TENS ONLY  |                                                                                                 |
| (Paker et al., 2006)                                                     | <sup>267</sup>                                       | In the present study, no serious adverse effects were reported in the intra-articular hylan group or in the TENS group.                                                                                                                                                                                                                           | Reported no adverse events               | Y           | N = 0 Tally      | One dropout due to worsening pain – not attributable to treatment                               |
| (Palmer et al., 2014)                                                    | <sup>268</sup>                                       | No statements present                                                                                                                                                                                                                                                                                                                             | No information to extract                | N           | N                |                                                                                                 |
| (Pan et al., 2003)                                                       | <sup>269</sup>                                       | Five patients complained of soreness in the upper arm after ESWT, but this soreness had subsided before their next visit. One patient had cardiac palpitations during the first ESWT session as a result of anxiety but was calm after taking a break. Otherwise, no specific side effect (e.g., hematoma, paresthesia) occurred in either group. | No adverse events recorded in TENS group | Y           | Y                | Extractable data: (soreness) TENS = 0 events /30 participants ESWT = 5 events / 33 participants |
| (Park et al., 2015)                                                      | <sup>270</sup>                                       | No adverse reactions related to TENS were observed.                                                                                                                                                                                                                                                                                               | Reported no adverse events               | Y           | N = 0 TENS ONLY  | No numerical data                                                                               |
| (Patil and Aileni, 2017)                                                 | <sup>271</sup>                                       | No statements present                                                                                                                                                                                                                                                                                                                             | No information to extract                | N           | N                |                                                                                                 |
| (Peacock et al., 2019)                                                   | <sup>272</sup>                                       | ... and no adverse events were reported in relation to the administration of the Biomodulator, traditional Chinese acupuncture, or TENS device in the study.                                                                                                                                                                                      | Reported no adverse events               | Y = 0 tally | N = 0 tally      | No numerical data                                                                               |
| (Pietrosimone et al., 2009)                                              | <sup>273</sup>                                       | No statements present                                                                                                                                                                                                                                                                                                                             | No information to extract                | N           | N                |                                                                                                 |
| (Pietrosimone et al., 2011) Secondary Report (Pietrosimone et al., 2010) | <sup>274</sup><br>Secondary Report<br><sup>275</sup> | No adverse events were reported to the study personnel regarding TENS or placebo usage.                                                                                                                                                                                                                                                           | Reported no adverse events               | Y = 0 tally | N = 0 tally      |                                                                                                 |
| (Pietrosimone et al., 2020)                                              | <sup>276</sup>                                       | No statements present                                                                                                                                                                                                                                                                                                                             | No information to extract                | N           | N                |                                                                                                 |
| (Pike, 1978)                                                             | <sup>277</sup>                                       | The duration of stimulation, whether intermittent or continuous, is unimportant since neither tachyphylaxis nor side-effects occurred.                                                                                                                                                                                                            | Reported no adverse events               | Y           | N = 0 TENS ONLY  | No numerical data                                                                               |
| (Pitangui et al., 2012)                                                  | <sup>278</sup>                                       | No reports of side effects or dissatisfaction were made, supporting the results of other studies.                                                                                                                                                                                                                                                 | Reported no adverse events               | Y = 0 tally | N = 0 tally      |                                                                                                 |

| Reference                      | Reference number | Extracted Text                                                                                                                                                                                                                                                                                                                                                                                                                                                                                                                    | AEs related to TENS                           | Statement   | Extractable Data | Comment                                                                                     |
|--------------------------------|------------------|-----------------------------------------------------------------------------------------------------------------------------------------------------------------------------------------------------------------------------------------------------------------------------------------------------------------------------------------------------------------------------------------------------------------------------------------------------------------------------------------------------------------------------------|-----------------------------------------------|-------------|------------------|---------------------------------------------------------------------------------------------|
| (Pitangui et al., 2014)        | 279              | HFT and LFT are safe and effective resources without side effects and presenting good acceptance.....                                                                                                                                                                                                                                                                                                                                                                                                                             | Reported no adverse events                    | Y = 0 tally | N = 0 tally      |                                                                                             |
| (Platon et al., 2010)          | 280              | The only reported side effect of TENS during the study was discomfort during 1 min of the initial stimulation, which was noticed in some patients.                                                                                                                                                                                                                                                                                                                                                                                | Slight discomfort during stimulation          | Y           | N                | No numerical data                                                                           |
| (Platon et al., 2018)          | 281              | Some patients reported an uncomfortable stimulation during the 1 min of the initial stimulation with TENS as a side effect.                                                                                                                                                                                                                                                                                                                                                                                                       | Slight discomfort during stimulation          | Y           | N                | No numerical data                                                                           |
| (Prabhakar and Ramteke, 2011)  | 282              | No statements present                                                                                                                                                                                                                                                                                                                                                                                                                                                                                                             | No information to extract                     | N           | N                |                                                                                             |
| (Presser et al., 2000)         | 283              | No statements present                                                                                                                                                                                                                                                                                                                                                                                                                                                                                                             | No information to extract                     | N           | N                |                                                                                             |
| (Rainov et al., 1994)          | 284              | No statements present                                                                                                                                                                                                                                                                                                                                                                                                                                                                                                             | No information to extract                     | N           | N                |                                                                                             |
| (Rajfur et al., 2017)          | 285              | No statements present                                                                                                                                                                                                                                                                                                                                                                                                                                                                                                             | No information to extract                     | N           | N                |                                                                                             |
| (Rajpurohit et al., 2010)      | 286              | No statements present                                                                                                                                                                                                                                                                                                                                                                                                                                                                                                             | No information to extract                     | N           | N                |                                                                                             |
| (Rakel and Frantz, 2003)       | 287              | No statements present                                                                                                                                                                                                                                                                                                                                                                                                                                                                                                             | No information to extract                     | N           | N                |                                                                                             |
| (Rakel et al., 2014)           | 288              | No statements present                                                                                                                                                                                                                                                                                                                                                                                                                                                                                                             | No information to extract                     | N           | N                |                                                                                             |
| (Ramanathan et al., 2017)      | 289              | Consort identifies lost to follow due to AE in TENS and placebo group – but numerical data not clear<br>Of note, 11 patients (9.48%) reported popular rash and/or cutaneous blistering around the placement site of adhesive electrodes.....<br>Two patients were withdrawn for persistent cutaneous blistering.<br>Other reasons for withdrawal were ... and skin hypersensitivity to adhesive electrodes (n=3, 6.81%)<br>Authors note that withdrawals due to ‘device-related discomfort’ were in the active group (n=3 6.81%). | Skin irritation/blistering at electrode sites | Y           | N                | No data extracted because no clear numerical data between the different intervention groups |
| (Ramos et al., 2018)           | 290              | No statements present                                                                                                                                                                                                                                                                                                                                                                                                                                                                                                             | No information to extract                     | N           | N                |                                                                                             |
| (Rani et al., 2020)            | 291              | No statements present                                                                                                                                                                                                                                                                                                                                                                                                                                                                                                             | No information to extract                     | N           | N                |                                                                                             |
| (Ratajczak et al., 2011)       | 292              | No statements present                                                                                                                                                                                                                                                                                                                                                                                                                                                                                                             | No information to extract                     | N           | N                |                                                                                             |
| (Rawat et al., 1991)           | 293              | No statements present                                                                                                                                                                                                                                                                                                                                                                                                                                                                                                             | No information to extract                     | N           | N                |                                                                                             |
| (Renovato França et al., 2019) | 294              | No adverse events were observed in this study.                                                                                                                                                                                                                                                                                                                                                                                                                                                                                    | Reported no adverse events                    | Y = 0 tally | N = 0 tally      |                                                                                             |
| (Reuss et al., 1988)           | 295              | No statements present                                                                                                                                                                                                                                                                                                                                                                                                                                                                                                             | No information to extract                     | N           | N                |                                                                                             |
| (Revadkar and Bhojwani, 2019)  | 296              | No statements present                                                                                                                                                                                                                                                                                                                                                                                                                                                                                                             | No information to extract                     | N           | N                |                                                                                             |
| (Ringel and Taubert, 1991)     | 297              | No statements present                                                                                                                                                                                                                                                                                                                                                                                                                                                                                                             | No information to extract                     | N           | N                |                                                                                             |
| (Robb et al., 2007)            | 298              | No statements present                                                                                                                                                                                                                                                                                                                                                                                                                                                                                                             | No information to extract                     | N           | N                |                                                                                             |
| (Robinson et al., 2001)        | 299              | No statements present                                                                                                                                                                                                                                                                                                                                                                                                                                                                                                             | No information to extract                     | N           | N                |                                                                                             |
| (Roche et al., 1985)           | 300              | No statements present                                                                                                                                                                                                                                                                                                                                                                                                                                                                                                             | No information to extract                     | N           | N                |                                                                                             |
| (Rooney et al., 1983)          | 301              | No statements present. Authors state that TENS is ‘safe’ in the conclusion. No further info.                                                                                                                                                                                                                                                                                                                                                                                                                                      | No information to extract                     | N           | N                |                                                                                             |
| (Rosenberg et al., 1978)       | 302              | No complications were observed in this study from the use of TENS and the only morbidity reported has involved skin reactions at the electrode sites                                                                                                                                                                                                                                                                                                                                                                              | Skin reaction at electrode sites              | Y           | N                | No numerical data                                                                           |
| (Rutgers et al., 1988)         | 303              | No statements present                                                                                                                                                                                                                                                                                                                                                                                                                                                                                                             | No information to extract                     | N           | N                |                                                                                             |

| Reference                       | Reference number | Extracted Text                                                                                                                                                                                                                                                                                                                                                                                                                                                                                                                                                                                                               | AEs related to TENS                                                                              | Statement   | Extractable Data | Comment                                                                                                                                                                                                                                                                                                                                                        |
|---------------------------------|------------------|------------------------------------------------------------------------------------------------------------------------------------------------------------------------------------------------------------------------------------------------------------------------------------------------------------------------------------------------------------------------------------------------------------------------------------------------------------------------------------------------------------------------------------------------------------------------------------------------------------------------------|--------------------------------------------------------------------------------------------------|-------------|------------------|----------------------------------------------------------------------------------------------------------------------------------------------------------------------------------------------------------------------------------------------------------------------------------------------------------------------------------------------------------------|
| (Sadala et al., 2018)           | <sup>304</sup>   | No statements present                                                                                                                                                                                                                                                                                                                                                                                                                                                                                                                                                                                                        | No information to extract                                                                        | N           | N                |                                                                                                                                                                                                                                                                                                                                                                |
| (Sahin et al., 2011)            | <sup>305</sup>   | No statements present                                                                                                                                                                                                                                                                                                                                                                                                                                                                                                                                                                                                        | No information to extract                                                                        | N           | N                |                                                                                                                                                                                                                                                                                                                                                                |
| (Samadzadeh et al., 2017)       | <sup>306</sup>   | No statements present                                                                                                                                                                                                                                                                                                                                                                                                                                                                                                                                                                                                        | No information to extract                                                                        | N           | N                | States in conclusion that TENS is safe but no info on adverse events in main text.                                                                                                                                                                                                                                                                             |
| (Sangtong et al., 2019)         | <sup>307</sup>   | Table 3 shows adverse events, patient global assessment, and patient satisfaction after treatment. More subjects in the study group had increased knee swelling than subjects in the control group (four patients (6.3%) vs. two patients (2.9%), respectively), but no significant difference (P = 0.430). Table 3 of their report                                                                                                                                                                                                                                                                                          | Joint swelling<br>Rash                                                                           | Y           | Y                | Data extracted (joint swelling and skin rash)<br>TENS + US = 4 events / 64 participants<br>US alone = 3 events / 68 participants                                                                                                                                                                                                                               |
| (Santamato et al., 2013)        | <sup>308</sup>   | None of the patients reported adverse effects during the study period.                                                                                                                                                                                                                                                                                                                                                                                                                                                                                                                                                       | Reported no adverse events                                                                       | Y = 0 tally | N = 0 tally      |                                                                                                                                                                                                                                                                                                                                                                |
| (Santana et al., 2016)          | <sup>309</sup>   | No statements present                                                                                                                                                                                                                                                                                                                                                                                                                                                                                                                                                                                                        | No information to extract                                                                        | N           | N                |                                                                                                                                                                                                                                                                                                                                                                |
| (Saranya et al., 2019)          | <sup>310</sup>   | No statements present                                                                                                                                                                                                                                                                                                                                                                                                                                                                                                                                                                                                        | No information to extract                                                                        | N           | N                |                                                                                                                                                                                                                                                                                                                                                                |
| (Sayilir and Yildizgoren, 2017) | <sup>311</sup>   | No statements present                                                                                                                                                                                                                                                                                                                                                                                                                                                                                                                                                                                                        | No information to extract                                                                        | N           | N                |                                                                                                                                                                                                                                                                                                                                                                |
| (Seo et al., 2013)              | <sup>312</sup>   | A total of 7 adverse events that required admission in 6 participants were reported during the study. The adverse events included a traffic accident, acute appendicitis, cellulitis, worsening of lower back pain, shoulder pain, uterine myoma, and spontaneous abortion. There was a possible relationship between the treatment and spontaneous abortion ... that occurred 21 days after BTX-A injection and electrical stimulation. She answered "no" to the question "Are you pregnant or do you have a plan for pregnancy?" before study enrolment. The other events were not related to the treatment in this study. | Spontaneous abortion possibly related to treatment. Other adverse events unrelated to treatment. | Y           | N                | Numerical data not necessarily related to TENS/intervention                                                                                                                                                                                                                                                                                                    |
| (Serry et al., 2016)            | <sup>313</sup>   | No statements present                                                                                                                                                                                                                                                                                                                                                                                                                                                                                                                                                                                                        | No information to extract                                                                        | N           | N                |                                                                                                                                                                                                                                                                                                                                                                |
| (Sezen et al., 2017)            | <sup>314</sup>   | We observed a small number of complications in the patients who were administered TENS in our study, but there was no statistically significant difference between the two groups. Table 4 of their report                                                                                                                                                                                                                                                                                                                                                                                                                   | Authors do not say whether complications were felt to be due to TENS                             | Y           | N                | Data related to post-operative complications. Debatably this is related to AE associated with op procedures rather than TENS.<br>We decided not to extract this data because AE from operation reflects efficacy of TENS rather than AE of TENS<br><br>Not extracted data (complications)<br>TENS (T) = 6 events / 43<br>Control placebo TENS = 10 events / 44 |

| Reference                     | Reference number | Extracted Text                                                                                                                                                                                                                                                                                                                                                                                                                                                                                                                                                                                                                                                                                                                                                                                                                                        | AEs related to TENS                                 | Statement   | Extractable Data | Comment                                                                                                                               |
|-------------------------------|------------------|-------------------------------------------------------------------------------------------------------------------------------------------------------------------------------------------------------------------------------------------------------------------------------------------------------------------------------------------------------------------------------------------------------------------------------------------------------------------------------------------------------------------------------------------------------------------------------------------------------------------------------------------------------------------------------------------------------------------------------------------------------------------------------------------------------------------------------------------------------|-----------------------------------------------------|-------------|------------------|---------------------------------------------------------------------------------------------------------------------------------------|
|                               |                  |                                                                                                                                                                                                                                                                                                                                                                                                                                                                                                                                                                                                                                                                                                                                                                                                                                                       |                                                     |             |                  | Not definitely attributed to the intervention                                                                                         |
| (Shahoei et al., 2017)        | <sup>315</sup>   | No statements present<br>... Since it has no negative consequences for mothers and their fetus, it is considered a safe pain relief method.                                                                                                                                                                                                                                                                                                                                                                                                                                                                                                                                                                                                                                                                                                           | No information to extract                           | N           | N                |                                                                                                                                       |
| (Shehab and Adham, 2000)      | <sup>316</sup>   | No statements present                                                                                                                                                                                                                                                                                                                                                                                                                                                                                                                                                                                                                                                                                                                                                                                                                                 | No information to extract                           | N           | N                |                                                                                                                                       |
| (Shery et al., 2001)          | <sup>317</sup>   | No statements present                                                                                                                                                                                                                                                                                                                                                                                                                                                                                                                                                                                                                                                                                                                                                                                                                                 | No information to extract                           | N           | N                |                                                                                                                                       |
| (Shimoji et al., 2007)        | <sup>318</sup>   | There were three cases of skin flash at sites of electrode placement in subjects treated with TENS using CPWs, but these disappeared within a day without intervention. No such skin irritation occurred in subjects who received TENS using BMWs. No other complications were reported in both groups.<br>There was also a sham TENS group but no mention of AEs/complications                                                                                                                                                                                                                                                                                                                                                                                                                                                                       | 'Skin flash' (3 cases) in CPW group                 | Y           | Y                | Data extracted (skin irritation) TENS (CPWs) = 3 / 9<br>BMWs (bidirectional modulated sine waves) = 0 events / 11                     |
| (Shimoura et al., 2019)       | <sup>319</sup>   | No adverse effect was noted with the TENS or sham-TENS treatment.                                                                                                                                                                                                                                                                                                                                                                                                                                                                                                                                                                                                                                                                                                                                                                                     | Reported no adverse events                          | Y = 0 tally | N = 0 tally      |                                                                                                                                       |
| (Shoukry and Al-Ansary, 2019) | <sup>320</sup>   | Adverse effect during or after the procedure was recorded and treated. Table 3 shows that adverse effects [were significantly less frequent among group-A [TENS + i.v. fentanyl] compared to group-B [i.v. fentanyl]. These statements relate to adverse effects associated with ESWT procedure rather than TENS                                                                                                                                                                                                                                                                                                                                                                                                                                                                                                                                      | O2 desaturation<br>Nausea and vomiting<br>Dizziness | N           |                  | The data provides information about effect of TENS on incidence of adverse events associated with ESWT procedure + fentanyl treatment |
| (Siemens et al., 2020)        | <sup>321</sup>   | Two patients experienced an uncomfortable feeling caused by the current, one after IMT and one after PBT<br><br>One out of 20 (5%) patients perceived the electric current as uncomfortable after the IMT phase and 1/20 (5%) after the PBT phase. No other TENS-related adverse events were reported. Four patients (20%) generally criticized that cables were impractical and one (5%) patient felt disturbed by the electrodes. After testing both TENS modes, 7/20 (35%) patients requested a prescription for the TENS device in order to use TENS after discharge.<br><br>A usability problem rather than a safety problem was the fact that the main reason for stopping the study after period 2 was the burden in using TENS (5/15, 33%), e.g., because of the disturbing cables of the device (see Online Resource 5 for further reasons). |                                                     | N           | N                | Frequency data between placebo and TENS interventions not provided                                                                    |
| (Sikiru et al., 2008)         | <sup>322</sup>   | The results demonstrated a significant decrease in the NIH-CPSI (P = 0.0002) with no urethral, anal complaints or other side effects                                                                                                                                                                                                                                                                                                                                                                                                                                                                                                                                                                                                                                                                                                                  | Reported no adverse events                          | Y = 0 tally | N = 0 tally      |                                                                                                                                       |
| (Silva et al., 2012)          | <sup>323</sup>   | No statements present                                                                                                                                                                                                                                                                                                                                                                                                                                                                                                                                                                                                                                                                                                                                                                                                                                 | No information to extract                           | N           | N                |                                                                                                                                       |
| (Silva et al., 2014)          | <sup>324</sup>   | No statements present                                                                                                                                                                                                                                                                                                                                                                                                                                                                                                                                                                                                                                                                                                                                                                                                                                 | No information to extract                           | N           | N                |                                                                                                                                       |
| (Sim, 1991)                   | <sup>325</sup>   | No statements present                                                                                                                                                                                                                                                                                                                                                                                                                                                                                                                                                                                                                                                                                                                                                                                                                                 | No information to extract                           | N           | N                |                                                                                                                                       |
| (Siqueira et al., 2019)       | <sup>326</sup>   | No statements present                                                                                                                                                                                                                                                                                                                                                                                                                                                                                                                                                                                                                                                                                                                                                                                                                                 | No information to extract                           | N           | N                |                                                                                                                                       |
| (Sloan et al., 1986)          | <sup>327</sup>   | No statements present                                                                                                                                                                                                                                                                                                                                                                                                                                                                                                                                                                                                                                                                                                                                                                                                                                 | No information to extract                           | N           | N                |                                                                                                                                       |

| Reference                     | Reference number | Extracted Text                                                                                                                                                                                                                                        | AEs related to TENS           | Statement | Extractable Data      | Comment                                                                                                                                                                                                                                                                                          |
|-------------------------------|------------------|-------------------------------------------------------------------------------------------------------------------------------------------------------------------------------------------------------------------------------------------------------|-------------------------------|-----------|-----------------------|--------------------------------------------------------------------------------------------------------------------------------------------------------------------------------------------------------------------------------------------------------------------------------------------------|
| (Smania et al., 2005)         | <sup>328</sup>   | No statements present                                                                                                                                                                                                                                 | No information to extract     | N         | N                     | There was data missing from final analysis but no explanation given                                                                                                                                                                                                                              |
| (Smedley et al., 1988)        | <sup>329</sup>   | No statements present                                                                                                                                                                                                                                 | No information to extract     | N         | N                     |                                                                                                                                                                                                                                                                                                  |
| (Smith et al., 1983)          | <sup>330</sup>   | Only one patient noticed any adverse effects from the treatment, a mild skin reaction to the electrode jelly.                                                                                                                                         | Skin irritation in 1 patient. | Y         | N                     | No numerical data to extract                                                                                                                                                                                                                                                                     |
| (Smith et al., 1986)          | <sup>331</sup>   | No statements present                                                                                                                                                                                                                                 | No information to extract     | N         | N                     |                                                                                                                                                                                                                                                                                                  |
| (Sodipo et al., 1980)         | <sup>332</sup>   | No statements present                                                                                                                                                                                                                                 | No information to extract     | N         | N                     |                                                                                                                                                                                                                                                                                                  |
| (Solak et al., 2007)          | <sup>333</sup>   | No statements present                                                                                                                                                                                                                                 | No information to extract     | N         | N                     |                                                                                                                                                                                                                                                                                                  |
| (Solak et al., 2009)          | <sup>334</sup>   | No statements present                                                                                                                                                                                                                                 | No information to extract     | N         | N                     |                                                                                                                                                                                                                                                                                                  |
| (Sonde et al., 1998)          | <sup>335</sup>   | No statements present                                                                                                                                                                                                                                 | No information to extract     | N         | N                     |                                                                                                                                                                                                                                                                                                  |
| (Stepanovic et al., 2015)     | <sup>336</sup>   | Adverse effects were associated with a specific treatment of herpes zoster ( $n = 5$ ) and analgesics prescribed ( $n = 20$ ). Most common complication was a bacterial superinfection, in either group there was no serious complication.            | Reported no adverse events    | Y         | N = 0<br>TENS<br>ONLY |                                                                                                                                                                                                                                                                                                  |
| (Stepoe and Bo, 1984)         | <sup>337</sup>   | TENS is almost free from adverse events                                                                                                                                                                                                               | No information to extract     | N         | N                     |                                                                                                                                                                                                                                                                                                  |
| (Stratton and Smith, 1980)    | <sup>338</sup>   | No statements present                                                                                                                                                                                                                                 | No information to extract     | N         | N                     |                                                                                                                                                                                                                                                                                                  |
| (Stubbing and Jellicoe, 1988) | <sup>339</sup>   | No statements present                                                                                                                                                                                                                                 | No information to extract     | N         | N                     |                                                                                                                                                                                                                                                                                                  |
| (Suh et al., 2015)            | <sup>340</sup>   | No statements present                                                                                                                                                                                                                                 | No information to extract     | N         | N                     |                                                                                                                                                                                                                                                                                                  |
| (Talbot et al., 2020)         | <sup>341</sup>   | No statements present                                                                                                                                                                                                                                 | No information to extract     | N         | N                     |                                                                                                                                                                                                                                                                                                  |
| (Tantawy et al., 2018)        | <sup>342</sup>   | No statements present                                                                                                                                                                                                                                 | No information to extract     | N         | N                     |                                                                                                                                                                                                                                                                                                  |
| (Taylor et al., 1981)         | <sup>343</sup>   | No statements present                                                                                                                                                                                                                                 | No information to extract     | N         | N                     |                                                                                                                                                                                                                                                                                                  |
| (Taylor et al., 1983)         | <sup>344</sup>   | No statements present                                                                                                                                                                                                                                 | No information to extract     | N         | N                     |                                                                                                                                                                                                                                                                                                  |
| (Thakur and Patidar, 2004)    | <sup>345</sup>   | Side effects were more in the tramadol group in the form of nausea 7%, vomiting 3%, drowsiness 2% and fetal distress 2%, what while in the control group only one percent had fetal distress. Intense group none had any side effects Data in Table 6 | Reported no adverse events    | Y         | Y                     | Data extracted<br>TENS = 0 events / 100<br>Control (no intervention) = 1 event / 100 participants (Fetal distress)<br><br>Also: Tramadol = 14 / 100 participants (nausea, vomiting, drowsiness, fetal distress)<br>– did not add to forest plot to prevent double counting in sub group analysis |
| (Thomas et al., 1988)         | <sup>346</sup>   | No statements present                                                                                                                                                                                                                                 | No information to extract     | N         | N                     |                                                                                                                                                                                                                                                                                                  |
| (Thomas et al., 1995)         | <sup>347</sup>   | No statements present                                                                                                                                                                                                                                 | No information to extract     | N         | N                     |                                                                                                                                                                                                                                                                                                  |
| (Thorsteinsson et al., 1978)  | <sup>348</sup>   | No statements present                                                                                                                                                                                                                                 | No information to extract     | N         | N                     |                                                                                                                                                                                                                                                                                                  |
| (Tilak et al., 2016)          | <sup>349</sup>   | No statements present                                                                                                                                                                                                                                 | No information to extract     | N         | N                     |                                                                                                                                                                                                                                                                                                  |

| Reference                   | Reference number | Extracted Text                                                                                                                                                                                                                                                                                                                                                                                                                                                                                                  | AEs related to TENS                                                | Statement   | Extractable Data | Comment                                                                                                                                             |
|-----------------------------|------------------|-----------------------------------------------------------------------------------------------------------------------------------------------------------------------------------------------------------------------------------------------------------------------------------------------------------------------------------------------------------------------------------------------------------------------------------------------------------------------------------------------------------------|--------------------------------------------------------------------|-------------|------------------|-----------------------------------------------------------------------------------------------------------------------------------------------------|
| (Tokuda et al., 2014)       | 350              | We observed no side effects; thus, TENS may be particularly useful for patients who have liver or kidney disease considering that analgesics are excreted through the kidney.                                                                                                                                                                                                                                                                                                                                   | Reported no adverse events                                         | Y = 0 tally | N = 0 tally      |                                                                                                                                                     |
| (Tonella et al., 2006)      | 351              | No statements present                                                                                                                                                                                                                                                                                                                                                                                                                                                                                           | No information to extract                                          | N           | N                |                                                                                                                                                     |
| (Topuz et al., 2004)        | 352              | No statements present                                                                                                                                                                                                                                                                                                                                                                                                                                                                                           | No information to extract                                          | N           | N                |                                                                                                                                                     |
| (Tosato et al., 2007)       | 353              | No statements present                                                                                                                                                                                                                                                                                                                                                                                                                                                                                           | No information to extract                                          | N           | N                |                                                                                                                                                     |
| (Treacy, 1999)              | 354              | No statements present                                                                                                                                                                                                                                                                                                                                                                                                                                                                                           | No information to extract                                          | N           | N                |                                                                                                                                                     |
| (Tsen et al., 2000)         | 355              | Some have raised the concern that TENS could interfere with fetal heart rate tracings,1 1 however, this was not witnessed in our review of fetal tracings, nor did we observe any incidents of non-reassuring fetal tracings2 4 subsequent to the CSE placement in either group.                                                                                                                                                                                                                                | Reported no adverse events.                                        | Y = 0 tally | N = 0 tally      |                                                                                                                                                     |
| (Tsen et al., 2001)         | 356              | No statements present                                                                                                                                                                                                                                                                                                                                                                                                                                                                                           | No information to extract                                          | N           | N                | Authors stated they would record adverse events but no comments included in results or discussion.                                                  |
| (Tsukayama et al., 2002)    | 357              | No adverse events were reported by the evaluator. The therapists reported some transient adverse events, for the EA group: transient aggravation of LBP (1 case), discomfort due to press tack needles (1 case), pain on needle insertion (1 case) and small subcutaneous bleeding (10mm in diameter, 1 case); in the TENS group: transient aggravation of back pain (1 case), transient fatigue (1 case), itching with electrode (1 case). Seven patients in each group did not experience any adverse events. | Increased back pain<br>Transient fatigue<br>Itching with electrode | Y           | Y                | Data extracted (symptom aggravation, skin reaction, fatigue)<br>TENS = 3 events / 10 participants<br>Electroacupuncture = 4 events / 9 participants |
| (Tucker et al., 2015)       | 358              | There were no clinically significant adverse events related to TENS in either group. In table 2 of their report                                                                                                                                                                                                                                                                                                                                                                                                 | Reported no adverse events                                         | Y = 0 tally | N = 0 tally      |                                                                                                                                                     |
| (Tugay et al., 2007)        | 359              | No adverse effects were observed, supporting the findings of the related literature.                                                                                                                                                                                                                                                                                                                                                                                                                            | Reported no adverse events                                         | Y = 0 tally | N = 0 TENS ONLY  |                                                                                                                                                     |
| (Tulgar et al., 1991a)      | 360              | No statements present                                                                                                                                                                                                                                                                                                                                                                                                                                                                                           | No information to extract                                          | N           | N                |                                                                                                                                                     |
| (Tulgar et al., 1991b)      | 361              | No statements present                                                                                                                                                                                                                                                                                                                                                                                                                                                                                           | No information to extract                                          | N           | N                |                                                                                                                                                     |
| (Unterrainer et al., 2010)  | 362              | In conclusion, the use of TENS before skin incision and postoperative is noninvasive, safe, simple, and free of systemic side effects in postoperative pain treatment after major spinal surgery.                                                                                                                                                                                                                                                                                                               | Reported no adverse events                                         | Y = 0 tally | N = 0 TENS ONLY  |                                                                                                                                                     |
| (Unterrainer et al., 2012)  | 363              | No statements present                                                                                                                                                                                                                                                                                                                                                                                                                                                                                           | No information to extract                                          | N           | N                |                                                                                                                                                     |
| (Upton et al., 2017)        | 364              | No adverse effects reported during the study.                                                                                                                                                                                                                                                                                                                                                                                                                                                                   | Reported no adverse events                                         | Y = 0 tally | N = 0 tally      |                                                                                                                                                     |
| (Vaidya, 2018)              | 365              | However, no negative effects were found with the use of TENS in any stage of pregnancy which supports the finding of our study [9]. No negative effects were reported for any of the patients.                                                                                                                                                                                                                                                                                                                  | Reported no adverse events                                         | Y = 0 tally | N = 0 tally      |                                                                                                                                                     |
| (Vaillancourt et al., 2019) | 366              | No statements present                                                                                                                                                                                                                                                                                                                                                                                                                                                                                           | No information to extract                                          | N           | N                |                                                                                                                                                     |

| Reference                    | Reference number | Extracted Text                                                                                                                                                                                                                                                                                                                                                                                                                                                                                                                                                                          | AEs related to TENS        | Statement   | Extractable Data | Comment                                                                                                                                                                                                                                                                                                       |
|------------------------------|------------------|-----------------------------------------------------------------------------------------------------------------------------------------------------------------------------------------------------------------------------------------------------------------------------------------------------------------------------------------------------------------------------------------------------------------------------------------------------------------------------------------------------------------------------------------------------------------------------------------|----------------------------|-------------|------------------|---------------------------------------------------------------------------------------------------------------------------------------------------------------------------------------------------------------------------------------------------------------------------------------------------------------|
| (Valenza et al., 2016)       | <sup>367</sup>   | No adverse effects were reported by any participant after any of the interventions.                                                                                                                                                                                                                                                                                                                                                                                                                                                                                                     | Reported no adverse events | Y = 0 tally | N = 0 tally      |                                                                                                                                                                                                                                                                                                               |
| (van der Ploeg et al., 1996) | <sup>368</sup>   | No adverse side-effects occurred.                                                                                                                                                                                                                                                                                                                                                                                                                                                                                                                                                       | Reported no adverse events | Y = 0 tally | N = 0 tally      |                                                                                                                                                                                                                                                                                                               |
| (van der Spank et al., 2000) | <sup>369</sup>   | No statements present                                                                                                                                                                                                                                                                                                                                                                                                                                                                                                                                                                   | No information to extract  | N           | N                |                                                                                                                                                                                                                                                                                                               |
| (Vance et al., 2012)         | <sup>370</sup>   | No statements present                                                                                                                                                                                                                                                                                                                                                                                                                                                                                                                                                                   | No information to extract  | N           | N                |                                                                                                                                                                                                                                                                                                               |
| (Vitalii and Oleg, 2014)     | <sup>371</sup>   | No side effects of LF-TENS were seen. Mean gabapentin dose was 1036.36 mg in the study group and 1560 mg in the control group, thus the basic dose was increased by 136.36 mg of gabapentin in the study group and by 560 mg in the control group (P=0.004; Fig. 2). Three patients from the control group reported drowsiness and dizziness on the ninth day of treatment (doses of gabapentin increased to 2700, 2400 and 1800 mg) and one patient reported blurred vision (dose of gabapentin increased to 2700 mg). No side effects of gabapentin were reported in the study group. | Reported no adverse events | Y           | N                | No data extracted because AEs due to the higher doses of gabapentin in control group. Thus, data reflects TENS efficacy in reducing AEs associated with gabapentin<br><br>TENS + gabapentin = 0 events<br>Placebo TENS + gabapentin = 4 events (drowsiness + dizziness, blurred vision related to gabapentin) |
| (Vrouva et al., 2019)        | <sup>372</sup>   | No statements present                                                                                                                                                                                                                                                                                                                                                                                                                                                                                                                                                                   | No information to extract  | N           | N                |                                                                                                                                                                                                                                                                                                               |
| (Walker et al., 1991)        | <sup>373</sup>   | No statements present                                                                                                                                                                                                                                                                                                                                                                                                                                                                                                                                                                   | No information to extract  | N           | N                |                                                                                                                                                                                                                                                                                                               |
| (Wang et al., 2009)          | <sup>374</sup>   | No statements present                                                                                                                                                                                                                                                                                                                                                                                                                                                                                                                                                                   | No information to extract  | N           | N                |                                                                                                                                                                                                                                                                                                               |
| (Warfield et al., 1985)      | <sup>375</sup>   | There were no complications in either group as a result of TENS. We conclude that TENS is a safe, effective adjunctive therapy for post thoracotomy pain.                                                                                                                                                                                                                                                                                                                                                                                                                               | Reported no adverse events | Y = 0 tally | N = 0 tally      |                                                                                                                                                                                                                                                                                                               |
| (Warke et al., 2004)         | <sup>376</sup>   | No statements present                                                                                                                                                                                                                                                                                                                                                                                                                                                                                                                                                                   | No information to extract  | N           | N                |                                                                                                                                                                                                                                                                                                               |
| (Warke et al., 2006)         | <sup>377</sup>   | No statements present                                                                                                                                                                                                                                                                                                                                                                                                                                                                                                                                                                   | No information to extract  | N           | N                |                                                                                                                                                                                                                                                                                                               |
| (Yameen et al., 2011)        | <sup>378</sup>   | No statements present                                                                                                                                                                                                                                                                                                                                                                                                                                                                                                                                                                   | No information to extract  | N           |                  | Transcutaneous electrical nerve stimulation is an effective, easy to use and with minimal side effects in patients suffering from trigeminal neuralgia not responding to conventional therapy.                                                                                                                |
| (Yesil et al., 2018)         | <sup>379</sup>   | No adverse events due to electrotherapy such as irritation or burning of the skin were observed.                                                                                                                                                                                                                                                                                                                                                                                                                                                                                        | Reported no adverse events | Y = 0 tally | N = 0 TENS ONLY  |                                                                                                                                                                                                                                                                                                               |
| (Yilmaz et al., 2020)        | <sup>380</sup>   | We did not observe any side effects or intolerance associated with TENS in our patients. Also, TENS application did not cause any negative changes in vital signs. This result indicates that TENS is easily applied, and its efficacy and safety could help in pain relief for inguinal herniorrhaphy.                                                                                                                                                                                                                                                                                 | Reported no adverse events | Y = 0 tally | N = 0 TENS ONLY  |                                                                                                                                                                                                                                                                                                               |

| Reference                     | Reference number | Extracted Text                                                                       | AEs related to TENS         | Statement   | Extractable Data | Comment                                                                                                                     |
|-------------------------------|------------------|--------------------------------------------------------------------------------------|-----------------------------|-------------|------------------|-----------------------------------------------------------------------------------------------------------------------------|
| (Yilmazer et al., 2012)       | <sup>381</sup>   | No statements present                                                                | No information to extract   | N           | N                |                                                                                                                             |
| (Yokoyama et al., 2004)       | <sup>382</sup>   | No statements present                                                                | No information to extract   | N           | N                |                                                                                                                             |
| (Yoshimizu et al., 2012)      | <sup>383</sup>   | No adverse effects or carryover effect were detected.                                | Reported no adverse events  | Y = 0 tally | N = 0 tally      |                                                                                                                             |
| (Yüksel et al., 2019)         | <sup>384</sup>   | No statements present                                                                | No information to extract   | N           | N                |                                                                                                                             |
| (Yurtkuran and Kocagil, 1999) | <sup>385</sup>   | No statements present                                                                | No information to extract   | N           | N                |                                                                                                                             |
| (Zakariaee et al., 2019)      | <sup>386</sup>   | No statements present                                                                | No information to extract   | N           | N                | Mentions that adverse events will be documented but then fails to provide data or clear statement in results nor discussion |
| (Zhang et al., 2020)          | <sup>387</sup>   | No statements present                                                                | No information to extract   | N           | N                |                                                                                                                             |
| (Zhou et al., 2018)           | <sup>388</sup>   | No adverse events were observed in either of the groups during the 8-week follow-up. | Reported no adverse events. | Y = 0 tally | N = 0 tally      |                                                                                                                             |

### Legend

Information was identified by searching for text and/or numerical data that referred to adverse events. Information was ‘cut and pasted’ into this Table. Where available, data on the occurrence of adverse events in each intervention arm was tallied as events (irrespective of severity) per number participants exposed (i.e. number in intervention arm), pooled and meta-analysed. If trial reports included a statement that no adverse events were observed during the study this was identified as such in our table. We only extracted data as ‘zero’ when the RCT report included numerical data for the presence of at least one adverse event in one of the trial arms and clearly stated that no adverse events had occurred in the other trial arm(s), in line with advice from the Cochrane Collaboration. Y, yes; N, no; TENS, transcutaneous electrical nerve stimulation.

### REFERENCES\*

\*Note: Reference numbering in this list relates only to studies cited in this table

1. Abbasi AA, Shehzad M, Hussain A. Transcutaneous Electrical Nerve Encouragement by Way of the Adjunct to Non-Steroidal Unwilling-Inflammatory Medicines for Aching Management Throughout Pleurodesis. *Indo American Journal of Pharmaceutical Sciences* 2019; **6**(6): 12943-7.
2. Abelson K, Langely GB, Sheppard H. Transcutaneous electrical nerve stimulation in rheumatoid arthritis. *New Zealand Medical Journal* 1983; **96**(727): 156-8.
3. Abreu EA, Santos JDMd, Ventura PLJRD. Efetividade da eletroestimulação nervosa transcutânea no alívio da dor durante o trabalho de parto: um ensaio clínico controlado. 2010; **11**(4): 313-8.
4. Acedo AA, Ludovice Antunes AC, Barros dos Santos A, et al. Upper trapezius relaxation induced by TENS and interferential current in computer users with chronic nonspecific neck discomfort: An electromyographic analysis. *Journal of back and musculoskeletal rehabilitation* 2015; **28**(1): 19-24.
5. Adedoyin RA, Olaogun MOB, Oyeyemi AL. Transcutaneous electrical nerve stimulation and interferential current combined with exercise for the treatment of knee osteoarthritis: a randomised controlled trial. *Hong Kong Physiotherapy Journal* 2005; **23**: 13-9.



6. Ahmed MT. Effect of transcutaneous electrical nerve stimulation on postoperative pain after inguinal hernia repair: A randomized placebo-controlled trial. [Turkish]. *Turkiye Fiziksel Tip ve Rehabilitasyon Dergisi* 2010; **56**(4): 170-6.
7. Ahmed GM, Maher EA, Elnassag BAEMR, Sayed HM, Kabbash SI. Effects of repetitive transcranial magnetic stimulation versus transcutaneous electrical nerve stimulation to decrease diabetic neuropathic pain. *International Journal of Therapy and Rehabilitation* 2020; **27**(2).
8. Alcidì L, Beneforti E, Maresca M, Santosuosso U, Zoppi M. Low power radiofrequency electromagnetic radiation for the treatment of pain due to osteoarthritis of the knee. *Reumatismo* 2007; **59**(2): 140-5.
9. Ali J, Yaffe CS, Serrette C. The effect of transcutaneous electric nerve stimulation on postoperative pain and pulmonary function. *Surgery* 1981; **89**(4): 507-12.
10. Alizade MH, Ahmadizad S. A comparison of exercise therapy and transcutaneous electrical nerve stimulation for the treatment of chronic low back pain. *Word J Sport Sci* 2009; **2**(1): 43-7.
11. Allais G, De Lorenzo C, Quirico PE, et al. Non-pharmacological approaches to chronic headaches: Transcutaneous electrical nerve stimulation, lasertherapy and acupuncture in transformed migraine treatment. *Neurological Sciences* 2003; **24**(SUPPL. 2): S138-S42.
12. Alm WA, Gold ML, Weil LS. Evaluation of transcutaneous electrical nerve stimulation (TENS) in podiatric surgery. *Journal of the American Podiatry Association* 1979; **69**(9): 537-42.
13. Al-Smadi J, Warke K, Wilson I, et al. A pilot investigation of the hypoalgesic effects of transcutaneous electrical nerve stimulation upon low back pain in people with multiple sclerosis. *Clinical rehabilitation* 2003; **17**(7): 742-9.
14. Altay F, Durmus D, Cantürk F. Effects of TENS on pain, disability, quality of life and depression in patients with knee osteoarthritis. *Turkish Journal of Rheumatology* 2010; **25**(3): 116-21.
15. Alvarez-Arenal A, Junquera LM, Fernandez JP, Gonzalez I, Olay S. Effect of occlusal splint and transcutaneous electric nerve stimulation on the signs and symptoms of temporomandibular disorders in patients with bruxism. *Journal of oral rehabilitation* 2002; **29**(9): 858-63.
16. Alves Silverio KC, Brasolotto AG, Thais Donalsonso Siqueira L, Carneiro CG, Fukushiro AP, Roberto de Jesus Guirro R. Effect of application of transcutaneous electrical nerve stimulation and laryngeal manual therapy in dysphonic women: clinical trial. *Journal of voice : official journal of the Voice Foundation* 2015; **29**(2): 200-8.
17. Amer-Cuenca JJ, Goicoechea C, Girona-Lopez A, et al. Pain relief by applying transcutaneous electrical nerve stimulation (TENS) during unsedated colonoscopy: a randomized double-blind placebo-controlled trial. *European journal of pain (London, England)* 2011; **15**(1): 29-35.
18. AminiSaman J, Karimpour H, Hemmatpour B, Mohammadi S, Darvishi S, Kawyannejad R. Effect of TENS on the Pain Intensity during Insertion of Needle in Patients Undergoing Spinal anesthesia: A Randomized Controlled Study. *Journal of acupuncture and meridian studies* 2020.
19. Angulo DL, Colwell Jr CW. Use of postoperative TENS and continuous passive motion following total knee replacement. *Journal of Orthopaedic and Sports Physical Therapy* 1990; **11**(12): 599-604.
20. Ardic F, Sarhus M, Topuz O. Comparison of two different techniques of electrotherapy on myofascial pain. *Journal of back and musculoskeletal rehabilitation* 2002; **16**(1): 11-6.
21. Arvidsson I, Eriksson E. Postoperative TENS pain relief after knee surgery: objective evaluation. *Orthopedics* 1986; **9**(10): 1346-51.
22. Asgari Z, Tavoli Z, Hosseini R, et al. A Comparative Study between Transcutaneous Electrical Nerve Stimulation and Fentanyl to Relieve Shoulder Pain during Laparoscopic Gynecologic Surgery under Spinal Anesthesia: A Randomized Clinical Trial. *Pain research & management* 2018; **2018**: 9715142.
23. Atamaz FC, Durmaz B, Baydar M, et al. Comparison of the efficacy of transcutaneous electrical nerve stimulation, interferential currents, and shortwave diathermy in knee osteoarthritis: a double-blind, randomized, controlled, multicenter study. *Archives of physical medicine and rehabilitation* 2012; **93**(5): 748-56.
24. Aydin G, Tomruk S, Keles I, Demir SO, Orkun S. Transcutaneous electrical nerve stimulation versus baclofen in spasticity: Clinical and electrophysiologic comparison. *American Journal of Physical Medicine and Rehabilitation* 2005; **84**(8): 584-92.
25. Azatcam G, Atalay NS, Akkaya N, et al. Comparison of effectiveness of Transcutaneous Electrical Nerve Stimulation and Kinesio Taping added to exercises in patients with myofascial pain syndrome. *Journal of back and musculoskeletal rehabilitation* 2017; **30**(2): 291-8.

26. Báez-Suárez A, Martín-Castillo E, García-Andújar J, García-Hernández J, Quintana-Montesdeoca MP, Loro-Ferrer JF. Evaluation of different doses of transcutaneous nerve stimulation for pain relief during labour: a randomized controlled trial. *Trials* 2018; **19**(1): 652.
27. Bai HY, Bai HY, Yang ZQ. Effect of transcutaneous electrical nerve stimulation therapy for the treatment of primary dysmenorrheal. *Medicine* 2017; **96**(36): e7959.
28. Baki ED, Oz G, Kokulu S, et al. Comparison of Transcutaneous Electrical Nerve Stimulation and Paravertebral Block for Postthoracotomy Pain Relief. *The Thoracic and cardiovascular surgeon* 2015; **63**(6): 514-8.
29. Ballegaard S, Christophersen S, Dawids S, Hesse J, Olsen N. Acupuncture and transcutaneous electric nerve stimulation in the treatment of pain associated with chronic pancreatitis. A randomized study. *Scand J Gastroenterol* 1985; **20**(10): 1249-54.
30. Barbarisi M, Pace MC, Passavanti MB, et al. Pregabalin and transcutaneous electrical nerve stimulation for postherpetic neuralgia treatment. *The Clinical journal of pain* 2010; **26**(7): 567-72.
31. Barker R, Lang T, Steinlechner B, et al. Transcutaneous electrical nerve stimulation as prehospital emergency interventional care: Treating acute pelvic pain in young women. *Neuromodulation : journal of the International Neuromodulation Society* 2006; **9**(2): 136-42.
32. Barker KL, Elliott CJ, Sackley CM, Fairbank JC. Treatment of chronic back pain by sensory discrimination training. A Phase I RCT of a novel device (FairMed) vs. TENS. *BMC musculoskeletal disorders* 2008; **9**: 97.
33. Başkurt Z, Başkurt F, Özcan A, Yılmaz Ö. The immediate effects of heat and TENS on pressure pain threshold and pain intensity in patients with Stage I shoulder impingement syndrome. *The Pain Clinic* 2006; **18**(1): 81-5.
34. Bayindir O, Paker T, Akpınar B, Erentürk S, Askin D, Aytac A. Use of transcutaneous electrical nerve stimulation in the control of postoperative chest pain after cardiac surgery. *Journal of cardiothoracic and vascular anesthesia* 1991; **5**(6): 589-91.
35. Beckwée D, Bautmans I, Lefeber N, Lievens P, Scheerlinck T, Vaes P. Effect of Transcutaneous Electric Nerve Stimulation on Pain after Total Knee Arthroplasty: a Blind Randomized Controlled Trial. *Journal of knee surgery* 2018; **31**(2): 189-96.
36. Benedetti F, Amanzio M, Casadio C, et al. Control of postoperative pain by transcutaneous electrical nerve stimulation after thoracic operations. *The Annals of thoracic surgery* 1997; **63**(3): 773-6.
37. Bennett MI, Johnson MI, Brown SR, Radford H, Brown JM, Searle RD. Feasibility study of Transcutaneous Electrical Nerve Stimulation (TENS) for cancer bone pain. *The journal of pain : official journal of the American Pain Society* 2010; **11**(4): 351-9.
38. Bergeron-Vezina K, Filion C, Couture C, Vallee E, Laroche S, Leonard G. Adjusting Pulse Amplitude During Transcutaneous Electrical Nerve Stimulation Does Not Provide Greater Hypoalgesia. *Journal of alternative and complementary medicine (New York, NY)* 2018; **24**(3): 262-7.
39. Bertalanffy A, Kober A, Bertalanffy P, et al. Transcutaneous electrical nerve stimulation reduces acute low back pain during emergency transport. *Academic emergency medicine : official journal of the Society for Academic Emergency Medicine* 2005; **12**(7): 607-11.
40. Bi X, Lv H, Chen BL, Li X, Wang XQ. Effects of transcutaneous electrical nerve stimulation on pain in patients with spinal cord injury: a randomized controlled trial. *Journal of Physical Therapy Science* 2015; **27**(1): 23-5.
41. Bilgili A, Cakir T, Dogan SK, Ercalik T, Filiz MB, Toraman F. The effectiveness of transcutaneous electrical nerve stimulation in the management of patients with complex regional pain syndrome: A randomized, double-blinded, placebo-controlled prospective study. *Journal of back and musculoskeletal rehabilitation* 2016; **29**(4): 661-71.
42. Binder P, Gustafsson A, Uvnas-Moberg K, Nissen E. Hi-TENS combined with PCA-morphine as post caesarean pain relief. *Midwifery* 2011; **27**(4): 547-52.
43. Bjersa K, Andersson T. High frequency TENS as a complement for pain relief in postoperative transition from epidural to general analgesia after pancreatic resection. *Complementary therapies in clinical practice* 2014; **20**(1): 5-10.
44. Bjersa K, Jildenstaal P, Jakobsson J, Egardt M, Fagevik Olsen M. Adjunct High Frequency Transcutaneous Electric Stimulation (TENS) for Postoperative Pain Management during Weaning from Epidural Analgesia Following Colon Surgery: Results from a Controlled Pilot Study. *Pain management nursing : official journal of the American Society of Pain Management Nurses* 2015; **16**(6): 944-50.

45. Bloodworth DM, Nguyen BN, Garver W, et al. Comparison of stochastic vs. conventional transcutaneous electrical stimulation for pain modulation in patients with electromyographically documented radiculopathy. *American journal of physical medicine & rehabilitation* 2004; **83**(8): 584-91.
46. Bolat MS, Cinar O, Asci R, Buyukalpelli R. A novel method for pain control: infiltration free local anesthesia technique (INFLATE) for transrectal prostatic biopsy using transcutaneous electrical nerve stimulation (TENS). *International urology and nephrology* 2019; **51**(12): 2119-26.
47. Bono F, Salvino D, Mazza MR, et al. The influence of ictal cutaneous allodynia on the response to occipital transcutaneous electrical stimulation in chronic migraine and chronic tension-type headache: a randomized, sham-controlled study. *Cephalalgia* 2015; **35**(5): 389-98.
48. Borjesson M, Eriksson P, Dellborg M, Eliasson T, Mannheimer C. Transcutaneous electrical nerve stimulation in unstable angina pectoris. *Coronary artery disease* 1997; **8**(8-9): 543-50.
49. Borjesson M, Pilhall M, Eliasson T, Norssell H, Mannheimer C, Rolny P. Esophageal visceral pain sensitivity: Effects of TENS and correlation with manometric findings. *Digestive Diseases and Sciences* 1998; **43**(8): 1621-8.
50. Borup L, Wurlitzer W, Hedegaard M, Kesmodel US, Hvidman L. Acupuncture as pain relief during delivery: a randomized controlled trial. *Birth (berkeley, calif)* 2009; **36**(1): 5-12.
51. Breit R, Van der Wall H. Transcutaneous electrical nerve stimulation for postoperative pain relief after total knee arthroplasty. *The Journal of arthroplasty* 2004; **19**(1): 45-8.
52. Buchmuller A, Navez M, Millette-Bernardin M, et al. Value of TENS for relief of chronic low back pain with or without radicular pain. *European journal of pain (London, England)* 2012; **16**(5): 656-65.
53. Bulut M, Özcan A, Çakan T, Mektas M, Çulha C. The Comparison of Effectiveness of TENS and Placebo TENS in Peripheral Neuropathic Pain in Patients with Type II Diabetes Mellitus. *Turkiye Klinikleri Journal of Medical Sciences* 2011; **31**(4): 913-8.
54. Bundsen P, Ericson K, Peterson L, Thiringer K. Pain relief in labor by transcutaneous electrical nerve stimulation. Testing of a modified stimulation technique and evaluation of the neurological and biochemical condition of the newborn infant. *Acta obstetrica et gynecologica Scandinavica* 1982; **61**(2): 129-36.
55. Can F, Tandogan R, Yilmaz I, Dolunay E, Erden Z. Rehabilitation of patellofemoral pain syndrome: TENS versus diadynamic current therapy for pain relief. *Pain Clinic* 2003; **15**(1): 61-8.
56. Casale R, Damiani C, Maestri R, Wells CD. Pain and electrophysiological parameters are improved by combined 830-1064 high-intensity LASER in symptomatic carpal tunnel syndrome versus Transcutaneous Electrical Nerve Stimulation. A randomized controlled study. *European journal of physical and rehabilitation medicine* 2013; **49**(2): 205-11.
57. Çebi AT. Effects of transcutaneous electrical nerve stimulation on pain after impacted third molar surgery. *Medicina Oral Patologia Oral y Cirugia Bucal* 2019; **24**(3): e404-e8.
58. Celik EC, Erhan B, Gunduz B, Lakse E. The effect of low-frequency TENS in the treatment of neuropathic pain in patients with spinal cord injury. *Spinal cord* 2013; **51**(4): 334-7.
59. Cetin N, Aytar A, Atalay A, Akman M. Comparing hot pack, short-wave diathermy, ultrasound, and TENS on isokinetic strength, pain, and functional status of women with osteoarthritic knees: a single-blind, randomized, controlled trial. *American Journal of Physical Medicine and Rehabilitation* 2008; **87**(6): 443-51.
60. Chandra A, Banavaliker JN, Das PK, Hasti S. Use of transcutaneous electrical nerve stimulation as an adjunctive to epidural analgesia in the management of acute thoracotomy pain. *Indian J Anaesth* 2010; **54**(2): 116-20.
61. Cheing GL, Hui-Chan CW. Transcutaneous electrical nerve stimulation: nonparallel antinociceptive effects on chronic clinical pain and acute experimental pain. *Archives of physical medicine and rehabilitation* 1999; **80**(3): 305-12.
62. Cheing GL, Luk ML. Transcutaneous electrical nerve stimulation for neuropathic pain. *Journal of hand surgery (Edinburgh, Scotland)* 2005; **30**(1): 50-5.
63. Cheing GL, Hui-Chan CW, Chan KM. Does four weeks of TENS and/or isometric exercise produce cumulative reduction of osteoarthritic knee pain? *Clinical rehabilitation* 2002; **16**(7): 749-60.

64. Cheing GL, Tsui AY, Lo SK, Hui-Chan CW. Optimal stimulation duration of tens in the management of osteoarthritic knee pain. *Journal of rehabilitation medicine* 2003; **35**(2): 62-8.
65. Chellappa D, Thirupathy M. Comparative efficacy of low-Level laser and TENS in the symptomatic relief of temporomandibular joint disorders: a randomized clinical trial. *Indian journal of dental research* 2020; **31**(1): 42-7.
66. Cherian JJ, Harrison PE, Benjamin SA, Bhave A, Harwin SF, Mont MA. Do the Effects of Transcutaneous Electrical Nerve Stimulation on Knee Osteoarthritis Pain and Function Last? *The journal of knee surgery* 2016; **29**(6): 497-501.
67. Cherian JJ, Kapadia BH, McElroy MJ, et al. Knee Osteoarthritis: Does Transcutaneous Electrical Nerve Stimulation Work? *Orthopedics* 2016; **39**(1): e180-6.
68. Chesterton LS, Lewis AM, Sim J, et al. Transcutaneous electrical nerve stimulation as adjunct to primary care management for tennis elbow: pragmatic randomised controlled trial (TATE trial). *BMJ (Clinical research ed)* 2013; **347**: f5160.
69. Lewis M, Chesterton LS, Sim J, Mallen CD, Hay EM, van der Windt DA. An Economic Evaluation of TENS in Addition to Usual Primary Care Management for the Treatment of Tennis Elbow: Results from the TATE Randomized Controlled Trial. *PloS one* 2015; **10**(8): e0135460.
70. Chia Y, Arulkumaran S, Chua S, Ratnam S. Effectiveness of transcutaneous electric nerve stimulator for pain relief in labour. *Asia Oceania J Obstet Gynaecol* 1990; **16**(2): 145-51.
71. Chiou YF, Yeh ML, Wang YJ. Transcutaneous Electrical Nerve Stimulation on Acupuncture Points Improves Myofascial Pain, Moods, and Sleep Quality. *Rehabil Nurs* 2019.
72. Chitsaz A, Janghorbani M, Shaygannejad V, Ashtari F, Heshmatipour M, Freeman J. Sensory complaints of the upper extremities in multiple sclerosis: relative efficacy of nortriptyline and transcutaneous electrical nerve stimulation. *The Clinical journal of pain* 2009; **25**(4): 281-5.
73. Chiu TT, Hui-Chan CW, Chein G. A randomized clinical trial of TENS and exercise for patients with chronic neck pain. *Clinical rehabilitation* 2005; **19**(8): 850-60.
74. Cipriano G, Jr., de Camargo Carvalho AC, Bernardelli GF, Tayar Peres PA. Short-term transcutaneous electrical nerve stimulation after cardiac surgery: effect on pain, pulmonary function and electrical muscle activity. *Interactive cardiovascular and thoracic surgery* 2008; **7**(4): 539-43.
75. Cipriano G, Jr., Neder JA, Umpierre D, et al. Sympathetic ganglion transcutaneous electrical nerve stimulation after coronary artery bypass graft surgery improves femoral blood flow and exercise tolerance. *Journal of applied physiology (Bethesda, Md : 1985)* 2014; **117**(6): 633-8.
76. Coelho de Amorim JS, Braz Rossetti Mr, Mendes Braga NIH. Effects of manual therapy and electrotherapy on knee osteoarthritis. *ConScientiae Saude* 2014; **13**(1): 11-20.
77. Cooperman AM, Hall B, Mikalacki K, Hardy R, Sardar E. Use of transcutaneous electrical stimulation in the control of postoperative pain. *American journal of surgery* 1977; **133**(2): 185-7.
78. Coyne PJ, MacMurren M, Izzo T, Kramer T. Transcutaneous electrical nerve stimulator for procedural pain associated with intravenous needlesticks. *Journal of intravenous nursing* 1995; **18**(5): 263-7.
79. Crompton AC, Johnson N, Dudek U, Batra N, Tucker A. Is transcutaneous electrical nerve stimulation of any value during cervical laser treatment? *British journal of obstetrics and gynaecology* 1992; **99**(6): 492-4.
80. Cuschieri RJ, Morran CG, McArdle CS. Transcutaneous electrical stimulation for postoperative pain. *Annals of the Royal College of Surgeons of England* 1985; **67**(2): 127-9.
81. Cuschieri RJ, Morran CG, Pollock JG. Transcutaneous electrical stimulation for ischaemic pain at rest. *British medical journal (Clinical research ed)* 1987; **295**(6593): 306.
82. da Silva TFG, Suda EY, Marçulo CA, Paes FHS, Pinheiro GT. Comparison of transcutaneous electrical nerve stimulation and hydrotherapy effects on pain, flexibility and quality of life in patients with fibromyalgia. *Fisioterapia e Pesquisa* 2008; **15**(2): 118-24 7p.
83. da Silva MP, Liebano RE, Rodrigues VA, Abila LE, Ferreira LM. Transcutaneous electrical nerve stimulation for pain relief after liposuction: a randomized controlled trial. *Aesthetic plastic surgery* 2015; **39**(2): 262-9.

84. Dailey DL, Rakel BA, Vance CG, et al. Transcutaneous electrical nerve stimulation reduces pain, fatigue and hyperalgesia while restoring central inhibition in primary fibromyalgia. *Pain* 2013; **154**(11): 2554-62.
85. Dailey DL, Vance CGT, Rakel BA, et al. Transcutaneous Electrical Nerve Stimulation Reduces Movement-Evoked Pain and Fatigue: A Randomized, Controlled Trial. *Arthritis & Rheumatology* 2020; **72**(5): 824-36.
86. Davies JR. Ineffective transcutaneous nerve stimulation following epidural anaesthesia. *Anaesthesia* 1982 Apr; **37**(4): 453-457 1982.
87. Dawood MY, Ramos J. Transcutaneous electrical nerve stimulation (TENS) for the treatment of primary dysmenorrhea: a randomized crossover comparison with placebo TENS and ibuprofen. *Obstetrics and gynecology* 1990; **75**(4): 656-60.
88. De Angelis C, Perrone G, Santoro G, Nofroni I, Zichella L. Suppression of pelvic pain during hysteroscopy with a transcutaneous electrical nerve stimulation device. *Fertility and sterility* 2003; **79**(6): 1422-7.
89. De Giorgi I, Castroflorio T, Sartoris B, Deregibus A. The use of conventional transcutaneous electrical nerve stimulation in chronic facial myalgia patients. *Clinical oral investigations* 2017; **21**(1): 275-80.
90. de Oliveira RGCQ, Silva, J.C., de Almeida, J.F., de Araajo, R.C., Pitangui, A.C.R. High and low frequency TENS for primary dysmenorrhea: preliminary study. *ConScientiae Saude* 2012; **11**(1): 149-58.
91. de Orange FA, Amorim MMRd, Lima L. Uso da eletroestimulação transcutânea para alívio da dor durante o trabalho de parto em uma maternidade-escola: ensaio clínico controlado %J Revista Brasileira de Ginecologia e Obstetrícia. 2003; **25**: 45-52.
92. de Sousa L, Gomes-Sponholz FA, Nakano AM. Transcutaneous electrical nerve stimulation for the relief of post-partum uterine contraction pain during breast-feeding: a randomized clinical trial. *The journal of obstetrics and gynaecology research* 2014; **40**(5): 1317-23.
93. DeSantana JM, Santana-Filho VJ, Guerra DR, Sluka KA, Gurgel RQ, da Silva Jr WM. Hypoalgesic Effect of the Transcutaneous Electrical Nerve Stimulation Following Inguinal Herniorrhaphy: A Randomized, Controlled Trial. *Journal of Pain* 2008; **9**(7): 623-9.
94. DeSantana J, Sluka K, Rocha LG. High and low frequency TENS reduce postoperative pain intensity after laparoscopic tubal ligation: A randomized controlled trial. *Clinical Journal of Pain* 2009; **25**(2): 12-28.
95. Dewan A, Sharma R. Effectiveness of transcutaneous electrical nerve stimulation and interferential electrotherapy in adhesive capsulitis. *Pb Journal of Orthopaedics* 2011; **21**(1): 64.
96. Deyo RA, Walsh NE, Martin DC, Schoenfeld LS, Ramamurthy S. A controlled trial of transcutaneous electrical nerve stimulation (TENS) and exercise for chronic low back pain. *The New England journal of medicine* 1990; **322**(23): 1627-34.
97. Dibenedetto P, Iona LG, Zidarich V. CLINICAL-EVALUATION OF S-ADENOSYL-L-METHIONINE VERSUS TRANSCUTANEOUS ELECTRICAL NERVE-STIMULATION IN PRIMARY FIBROMYALGIA. *Current Therapeutic Research-Clinical and Experimental* 1993; **53**(2): 222-9.
98. Dilekci E, Alpayci M, Bayram KB, et al. The efficacy of TENS in patients with lateral epicondylitis: A randomized controlled study. [Turkish]. *Turkiye Fiziksel Tip ve Rehabilitasyon Dergisi* 2016; **62**(4): 297-302.
99. Dissanayaka TD, Pallegama RW, Suraweera HJ, Johnson MI, Kariyawasam AP. Comparison of the Effectiveness of Transcutaneous Electrical Nerve Stimulation and Interferential Therapy on the Upper Trapezius in Myofascial Pain Syndrome: A Randomized Controlled Study. *American journal of physical medicine & rehabilitation* 2016; **95**(9): 663-72.
100. Dogu B, Yilmaz F, Karan A, Ergoz E, Kuran B. Comparative the effectiveness of occlusal splint and TENS treatments on clinical findings and pain threshold of temporomandibular disorders secondary to bruxism. [Turkish]. *Turkiye Fiziksel Tip ve Rehabilitasyon Dergisi* 2008; **54**(4): 1-7.
101. Domaille M, Reeves B. TENS and pain control after coronary artery bypass surgery. *Physiotherapy* 1997; **83**(10): 510-6.
102. Ebadi S, Ansari N, Ahadi T, Fallah E, Forogh B. No immediate analgesic effect of diadynamic current in patients with nonspecific low back pain in comparison to TENS. *Journal of Bodywork and Movement Therapies* 2018; **22**(3): 693-9.
103. Ekblom A, Hansson P. Thermal sensitivity is not changed by acute pain or afferent stimulation. *Journal of neurology, neurosurgery, and psychiatry* 1987; **50**(9): 1216-20.

104. Ekim A, Armagan O, Oner C. [Efficiency of TENS treatment in hemiplegic shoulder pain: a placebo controlled study]. *Agri : Agri (Algoloji) Dernegi'nin Yayin organidir = The journal of the Turkish Society of Algology* 2008; **20**(1): 41-6.
105. Elboim-Gabyzon M, Andrawus Najjar S, Shtarker H. Effects of transcutaneous electrical nerve stimulation (TENS) on acute postoperative pain intensity and mobility after hip fracture: a double-blinded, randomized trial. *Clinical interventions in aging* 2019; **14**: 1841-50.
106. Elserty N, Kattabei O, Elhafez H. Effect of Fixed Versus Adjusted Transcutaneous Electrical Nerve Stimulation Amplitude on Chronic Mechanical Low Back Pain. *Journal of alternative and complementary medicine (New York, NY)* 2016; **22**(7): 557-62.
107. Emmiler M, Solak O, Kocogullari C, et al. Control of acute postoperative pain by transcutaneous electrical nerve stimulation after open cardiac operations: a randomized placebo-controlled prospective study. *The heart surgery forum* 2008; **11**(5): E300-3.
108. Engen DJ, Carns PE, Allen MS, et al. Evaluating efficacy and feasibility of transcutaneous electrical nerve stimulation for postoperative pain after video-assisted thoracoscopic surgery: A randomized pilot trial. *Complementary therapies in clinical practice* 2016; **23**: 141-8.
109. Erden S, Senol Celik S. The effect of transcutaneous electrical nerve stimulation on post-thoracotomy pain. *Contemporary nurse* 2015; **51**(2-3): 163-70.
110. Erdogan M, Erdogan A, Erbil N, Karakaya H, Demircan A. Prospective, randomized, placebo-controlled study of the effect of TENS on postthoracotomy pain and pulmonary function. *World journal of surgery* 2005; **29**(12): 1563-70.
111. Erkkola R, Pikkola P, Kanto J. Transcutaneous nerve stimulation for pain relief during labour: a controlled study. *Annales chirurgiae ET gynaecologiae* 1980; **69**(6): 273-7.
112. Escortell-Mayor E, Riesgo-Fuertes R, Garrido-Elustondo S, et al. Primary care randomized clinical trial: manual therapy effectiveness in comparison with TENS in patients with neck pain. *Manual therapy* 2011; **16**(1): 66-73.
113. Escortell Mayor E, Lebrijo Perez G, Perez Martin Y, Asunsolo del Barco A, Riesgo Fuertes R, Saa Requejo C. [Randomized clinical trial for primary care patients with neck pain: manual therapy versus electrical stimulation]. *Atencion primaria* 2008; **40**(7): 337-43.
114. Esteban Gonzalez P, Novoa NM, Varela G. Transcutaneous Electrical Nerve Stimulation Reduces Post-Thoracotomy Ipsilateral Shoulder Pain. A Prospective Randomized Study. *Archivos de bronconeumologia* 2015; **51**(12): 621-6.
115. Eyigor S, Karapolat H, Ibisoglu U, Durmaz B. Does transcutaneous electrical nerve stimulation or therapeutic ultrasound increase the effectiveness of exercise for knee osteoarthritis: A randomized controlled study. [Turkish]. *Agri : Agri (Algoloji) Dernegi'nin Yayin organidir = The journal of the Turkish Society of Algology* 2008; **20**(1): 32-40.
116. Eyigor C, Eyigor S, Kivilcim Korkmaz O. Are intra-articular corticosteroid injections better than conventional TENS in treatment of rotator cuff tendinitis in the short run? A randomized study. *European journal of physical and rehabilitation medicine* 2010; **46**(3): 315-24.
117. Facci LM, Nowotny JP, Tormem F, Trevisani VF. Effects of transcutaneous electrical nerve stimulation (TENS) and interferential currents (IFC) in patients with nonspecific chronic low back pain: randomized clinical trial. *Sao Paulo medical journal = Revista paulista de medicina* 2011; **129**(4): 206-16.
118. Farahani DM, Tavallaie SA, Ahmadi K, Ashtiani AF. Comparison of Neurofeedback and Transcutaneous Electrical Nerve Stimulation Efficacy on Treatment of Primary Headaches: A Randomized Controlled Clinical Trial. *Iranian Red Crescent Medical Journal* 2014; **16**(8).
119. Farina S, Casarotto M, Benelle M, et al. A randomized controlled study on the effect of two different treatments (FREMS AND TENS) in myofascial pain syndrome. *Europa medicophysica* 2004; **40**(4): 293-301.
120. Fatima N, Sarfraz N. Comparison of High Versus Low Transcutaneous Electrical Nerve Stimulation for Pain Management After Caesarean Section: A Clinical Trial. *Annals of King Edward Medical University Lahore Pakistan* 2019; **25**(2).
121. Ferraz FS, Moreira CMC. Eletroanalgesia com utilizacao da TENS no pos-operatorio de cirurgia cardiaca (Electroanalgesia with TENS in postoperative of cardiac surgery) [Portuguese]. *Fisioterapia em Movimento [Physical Therapy in Movement]* 2009 Jan-Mar; **22**(1):133-139 2009.
122. Ferreira FC, Issy AM, Sakata RK. Assessing the effects of transcutaneous electrical nerve stimulation (TENS) in post-thoracotomy analgesia. *Revista brasileira de anesthesiologia* 2011; **61**(5): 561-7, 308-10.

123. Ferreira AP, Costa DR, Oliveira AI, et al. Short-term transcutaneous electrical nerve stimulation reduces pain and improves the masticatory muscle activity in temporomandibular disorder patients: a randomized controlled trial. *Journal of applied oral science : revista FOB* 2017; **25**(2): 112-20.
124. Finsen V, Persen L, Lovlien M, et al. Transcutaneous electrical nerve stimulation after major amputation. *The Journal of bone and joint surgery British volume* 1988; **70**(1): 109-12.
125. Fiorelli A, Morgillo F, Milione R, et al. Control of post-thoracotomy pain by transcutaneous electrical nerve stimulation: effect on serum cytokine levels, visual analogue scale, pulmonary function and medication. *European journal of cardio-thoracic surgery : official journal of the European Association for Cardio-thoracic Surgery* 2012; **41**(4): 861-8; discussion 8.
126. Fodor-Sertl B, Miller K, Hohenfellner B. (Transcutaneous electric nerve block in postoperative pain-therapy) [German]. *Zeitschrift fuer Physikalische Medizin, Balneologie, Medizinische Klimatologie* 1990; **19**: 132-7.
127. Forogh B, Aslanpour H, Fallah E, Babaei-Ghazani A, Ebadi S. Adding high-frequency transcutaneous electrical nerve stimulation to the first phase of post anterior cruciate ligament reconstruction rehabilitation does not improve pain and function in young male athletes more than exercise alone: a randomized single-blind clinical trial. *Disability and rehabilitation* 2019; **41**(5): 514-22.
128. Forst T, Nguyen M, Forst S, Disselhoff B, Pohlmann T, Pfutzner A. Impact of low frequency transcutaneous electrical nerve stimulation on symptomatic diabetic neuropathy using the new Salutaris (R) device. *Diabetes Nutrition & Metabolism* 2004; **17**(3): 163-8.
129. Forster EL, Kramer JF, Lucy SD, Scudds RA, Novick RJ. Effect of TENS on pain, medications, and pulmonary function following coronary artery bypass graft surgery. *Chest* 1994; **106**(5): 1343-8.
130. Fujii-Abe K, Umino M, Kawahara H, Terada C, Satomura K, Fukayama H. New method for postoperative pain relief using a combination of noxious and non-noxious stimuli after impacted wisdom tooth extraction. *Journal of oral science* 2019; **61**(2): 364-9.
131. Galli TT, Chiavegato LD, Liebano RE. Effects of TENS in living kidney donors submitted to open nephrectomy: a randomized placebo-controlled trial. *European journal of pain (London, England)* 2015; **19**(1): 67-76.
132. Galloway DJ, Boyle P, Burns HJ, Davidson PM, George WD. A clinical assessment of electroanalgesia following abdominal operations. *Surgery, gynecology & obstetrics* 1984; **159**(5): 453-6.
133. Garcia-Perez S, Garcia-Rios MC, Perez-Marmol JM, et al. Effectiveness of Transcutaneous Electrical Nerve Stimulation Energy in Older Adults: A Pilot Clinical Trial. *Advances in skin & wound care* 2018; **31**(10): 462-9.
134. Gerson GR, Jones RB, Luscombe DK. Studies on the concomitant use of carbamazepine and clomipramine for the relief of post-herpetic neuralgia. *Postgraduate medical journal* 1977; **53 Suppl 4**: 104-9.
135. Ghoname ESA, Craig WF, White PF, et al. Percutaneous electrical nerve stimulation for low back pain - A randomized crossover study. *Jama-Journal of the American Medical Association* 1999; **281**(9): 818-23.
136. Ghoname ESA, White PF, Ahmed HE, Hamza MA, Craig WF, Noe CE. Percutaneous electrical nerve stimulation: an alternative to TENS in the management of sciatica. *Pain* 1999; **83**(2): 193-9.
137. Gilbert JM, Gledhill T, Law N, George C. Controlled trial of transcutaneous electrical nerve stimulation (TENS) for postoperative pain relief following inguinal herniorrhaphy. *The British journal of surgery* 1986; **73**(9): 749-51.
138. Grabiańska E, Leśniewicz J, Pieszyński I, Kostka J. Comparison of the analgesic effect of interferential current (IFC) and TENS in patients with low back pain. *Wiadomości lekarskie (Warsaw, Poland)* 2015; **68**(1): 13-9.
139. Graff-Radford S, Reeves J, Baker R, Chiu D. Effects of transcutaneous electrical nerve stimulation on myofascial pain and trigger point sensitivity. *Pain* 1989; **37**(1): 1-5.
140. Grant DJ, Bishop\_Miller J, Winchester DM, Anderson M, Faulkner S. A randomized comparative trial of acupuncture versus transcutaneous electrical nerve stimulation for chronic back pain in the elderly. *Pain* 1999; **82**(1): 9-13.

141. Gregorini C, Cipriano Jr G, De Aquino LM, Rodrigues Branco JN, Bernardelli GF. Short-duration transcutaneous electrical nerve stimulation in the postoperative period of cardiac surgery. [Portuguese, English]. *Arquivos brasileiros de cardiologia* 2010; **94**(3): 325-31+45-51.
142. Grimmer K. A controlled double blind study comparing the effects of strong burst mode TENS and High Rate TENS on painful osteoarthritic knees. *Australian Journal of Physiotherapy* 1992; **38**: 49-56.
143. Gschiel B, Kager H, Pipam W, Weichart K, Likar R. Analgesic efficacy of TENS therapy in patients with gonarthrosis. A prospective, randomised, placebo-controlled, double-blind study. [German]. *Schmerz (Berlin, Germany)* 2010; **24**(5): 494-500.
144. Gunay Ucurum S, Kaya DO, Kayali Y, Askin A, Tekindal MA. Comparison of different electrotherapy methods and exercise therapy in shoulder impingement syndrome: a prospective randomized controlled trial. *Acta orthopaedica et traumatologica turcica* 2018; **52**(4): 249-55.
145. Guo XJ, Jia J. Comparison of therapeutic effects on fibromyalgia syndrome between dermal-neurological electric stimulation and electric acupuncture. *Chinese Journal of Clinical Rehabilitation* 2005; **9**(46): 171-3.
146. Hamza MA, White PF, Ahmed HE, Ghoname EA. Effect of the frequency of transcutaneous electrical nerve stimulation on the postoperative opioid analgesic requirement and recovery profile. *Anesthesiology* 1999; **91**(5): 1232-8.
147. Hanfy HM, El-Bigawy A. Effects of transcutaneous electrical nerve stimulation versus acupressure in the treatment of primary dysmenorrhea. *Bull Fac Phys Ther Cairo Univ* 2004; **9**: 2.
148. Hansson P, Ekblom A. Transcutaneous electrical nerve stimulation (TENS) as compared to placebo TENS for the relief of acute oro-facial pain. *Pain* 1983; **15**(2): 157-65.
149. Hansson P, Ekblom A, Thomsson M, Fjellner B. Influence of naloxone on relief of acute oro-facial pain by transcutaneous electrical nerve stimulation (TENS) or vibration. *Pain* 1986; **24**(3): 323-9.
150. Hargreaves A, Lander J. Use of transcutaneous electrical nerve stimulation for postoperative pain. *Nursing research* 1989; **38**(3): 159-61.
151. Harrison RF, Woods T, Shore M, Mathews G, Unwin A. Pain relief in labour using transcutaneous electrical nerve stimulation (TENS). A TENS/TENS placebo controlled study in two parity groups. *British journal of obstetrics and gynaecology* 1986; **93**(7): 739-46.
152. Hart JM, Kuenze CM, Pietrosimone BG, Ingersoll CD. Quadriceps function in anterior cruciate ligament-deficient knees exercising with transcutaneous electrical nerve stimulation and cryotherapy: a randomized controlled study. *Clinical rehabilitation* 2012; **26**(11): 974-81.
153. Hazneci B, Tan AK, Ozdem T, Dincer K, Kalyon TA. The effects of transcutaneous electroneurostimulation and ultrasound in the treatment of reflex sympathetic dystrophy syndrome. [Turkish]. *Turkiye Fiziksel Tip ve Rehabilitasyon Dergisi* 2005; **51**(3): 83-9.
154. Herrera-Lasso I, Mobarak L, Fernández-Dominguez L, Cardiel MH, Alarcón-Segovia D. Comparative Effectiveness of Packages of Treatment Including Ultrasound or Transcutaneous Electrical Nerve Stimulation in Painful Shoulder Syndrome. *Physiotherapy* 1993; **79**(4): 251-3.
155. Hershman M CW, Swift R, Reilly D, Gompertz H, Wood C. Transcutaneous electrical nerve stimulation as adjunctive analgesia in patients undergoing abdominal procedures. *Surg Res Commun* 1989; **7**: 65-9.
156. Hou CR, Tsai LC, Cheng KF, Chung KC, Hong C. Immediate effects of various physical therapeutic modalities on cervical myofascial pain and trigger-point sensitivity. *Archives of physical medicine and rehabilitation* 2002; **83**(10): 1406-14.
157. Hokenek NM, Erdogan MO, Hokenek UD, Algin A, Tekyol D, Seyhan AU. Treatment of migraine attacks by transcutaneous electrical nerve stimulation in emergency department: A randomize controlled trial. *American Journal of Emergency Medicine* 2020.
158. Hruby G, Ames C, Chen C, et al. Assessment of efficacy of transcutaneous electrical nerve stimulation for pain management during office-based flexible cystoscopy. *Urology* 2006; **67**(5): 914-7.
159. Hsieh CYJ, Phillips RB, Adams AH, Pope MH. First prize: Functional outcomes of low back pain: Comparison of four treatment groups in a randomized controlled trial. *Journal of manipulative and physiological therapeutics* 1992; **15**(1): 4-9.
160. Hsueh TC, Cheng PT, Kuan TS, Hong CZ. The immediate effectiveness of electrical nerve stimulation and electrical muscle stimulation on myofascial trigger points. *American journal of physical medicine & rehabilitation* 1997; **76**(6): 471-6.



161. Hughes S, Dailey P, Partridge C. Transcutaneous electrical nerve stimulation for labour analgesia. *Anesthesia and analgesia* 1988; **67**: S99.
162. Husch HH, Watte G, Zanon M, et al. Effects of Transcutaneous Electrical Nerve Stimulation on Pain, Pulmonary Function, and Respiratory Muscle Strength After Posterolateral Thoracotomy: A Randomized Controlled Trial. *Lung* 2020; **198**(2): 345-53.
163. Ilhanli I. Conventional, Acupuncture-Like or Brief-Intense: Is There Any Difference Between TENS Modalities According to Outcomes of Chronic Low Back Pain with Lumbar Disc Herniation. *Clinical Medicine Research* 2015; **4**(5): 143-50.
164. Inal EE, Eroglu P, Yucel SH, Orhan H. Which is the Appropriate Frequency of TENS in Managing Knee Osteoarthritis: High or Low Frequency? *Journal of Clinical and Analytical Medicine* 2016; **7**(3): 339-44.
165. Isik M, Ugur M, Yakisan RS, Sari T, Yilmaz N. Comparison of the effectiveness of medicinal leech and TENS therapy in the treatment of primary osteoarthritis of the knee : A randomized controlled trial. *Zeitschrift fur Rheumatologie* 2017; **76**(9): 798-805.
166. Jaafarpour M, Khani A, Javadifar N, Taghinejad H, Mahmoudi R, Saadipour KH. The analgesic effect of transcutaneous electrical nerve stimulation (TENS) on caesarean under spinal anaesthesia. *Journal of Clinical and Diagnostic Research* 2008; **2**(3): 815-9.
167. Jamison RN, Wan L, Edwards RR, Mei A, Ross EL. Outcome of a High-Frequency Transcutaneous Electrical Nerve Stimulator (hfTENS) Device for Low Back Pain: A Randomized Controlled Trial. *Pain Practice* 2019; **19**(5): 466-75.
168. Jarzem P, Harvey E, Arcaro N, Kaczorowski J. Transcutaneous electrical nerve stimulation (TENS) for short-term treatment of low back pain - randomized double blind crossover study of sham versus conventional TENS. *Journal of Musculoskeletal Pain* 2005; **13**(2): 11-7.
169. Jensen JE, Conn RR, Hazelrigg G, Hewett JE. The use of transcutaneous neural stimulation and isokinetic testing in arthroscopic knee surgery. *American journal of sports medicine* 1985; **13**(1): 27-33.
170. Jensen H, Zesler R, Christensen T. Transcutaneous electrical nerve stimulation (TNS) for painful osteoarthritis of the knee. *International journal of rehabilitation research Internationale Zeitschrift fur Rehabilitationsforschung Revue internationale de recherches de readaptation* 1991; **14**(4): 356-8.
171. Jones AYM, Hutchinson RC. A comparison of the analgesic effect of transcutaneous electrical nerve stimulation and entonox. *Physiotherapy* 1991; **77**(8): 526-30.
172. Kara B, Baskurt F, Acar S, et al. The effect of TENS on pain, function, depression, and analgesic consumption in the early postoperative period with spinal surgery patients. *Turkish neurosurgery* 2011; **21**(4): 618-24.
173. Kararmaz A, Kaya S, Karaman H, Turhanoglu S. Effect of the frequency of transcutaneous electrical nerve stimulation on analgesia during extracorporeal shock wave lithotripsy. *Urological research* 2004; **32**(6): 411-5.
174. Kayman-Kose S, Ariozt DT, Toktas H, et al. Transcutaneous electrical nerve stimulation (TENS) for pain control after vaginal delivery and cesarean section. *The journal of maternal-fetal & neonatal medicine : the official journal of the European Association of Perinatal Medicine, the Federation of Asia and Oceania Perinatal Societies, the International Society of Perinatal Obstet* 2014; **27**(15): 1572-5.
175. Keskin EA, Onur O, Keskin HL, Gumus, II, Kafali H, Turhan N. Transcutaneous electrical nerve stimulation improves low back pain during pregnancy. *Gynecologic and obstetric investigation* 2012; **74**(1): 76-83.
176. Kibar S, Konak HE, V SA, DoĖAnay ErdoĖAn B, EvcİK D. The Effectiveness of Combined Transcutaneous Electrical Nerve Stimulation and Interferential Current Therapy on Chronic Low Back Pain: A Randomized, Double-Blind, Sham-Controlled Study. *Journal of Physical Medicine & Rehabilitation Sciences / Fiziksel Tıp ve Rehabilitasyon Bilimleri Dergisi* 2020; **23**(1): 32-40.
177. Kim S, Park K, Son B, Jeon Y. The Effect of Transcutaneous Electrical Nerve Stimulation on Pain During Venous Cannulation. *Current Therapeutic Research* 2012; **73**(4/5): 134-9.
178. Kim D-H, Yoon KB, Yoon DM, et al. Comparison of NSAID Patch Given as Monotherapy and NSAID Patch in Combination with Transcutaneous Electric Nerve Stimulation, a Heating Pad, or Topical Capsaicin in the Treatment of Patients with Myofascial Pain Syndrome of the Upper Trapezius: A Pilot Study. *Pain Medicine* 2014; **15**(12): 2128-38.
179. Kirupa K, Divya Mary SM, Vaishnavi G, Nithya Nisha R, Rennie Mercy J, Jaiganesh G. A comparative study of ultrasound therapy and transcutaneous electrical nerve stimulation in reducing pain for temporomandibular joint disorder. *Drug invention today* 2019; **12**(3): 515-7.

180. Knobel R, Radünz V, Carraro TEJT, Contexto-Enfermagem. Use of transcutaneous electric nerve stimulation for pain relief in labour: a possible way to care the child-bearer. 2005; **14**(2): 229-36.
181. Koca I, Boyaci A, Tutoglu A, Ucar M, Kocaturk O. Assessment of the effectiveness of interferential current therapy and TENS in the management of carpal tunnel syndrome: a randomized controlled study. *Rheumatology international* 2014; **34**(12): 1639-45.
182. Kofotolis ND, Vlachopoulos SP, Kellis E. Sequentially allocated clinical trial of rhythmic stabilization exercises and TENS in women with chronic low back pain. *Clinical rehabilitation* 2008; **22**(2): 99-111.
183. Koke AJ, Schouten JS, Lamerichs-Geelen MJ, et al. Pain reducing effect of three types of transcutaneous electrical nerve stimulation in patients with chronic pain: a randomized crossover trial. *Pain* 2004; **108**(1-2): 36-42.
184. Korkmaz OK, Capaci K, Eyigor C, Eyigor S. Pulsed radiofrequency versus conventional transcutaneous electrical nerve stimulation in painful shoulder: a prospective, randomized study. *Clinical rehabilitation* 2010; **24**(11): 1000-8.
185. Kumar S, Raje A. Effect of progressive muscular relaxation exercises versus transcutaneous electrical nerve stimulation on tension headache: A comparative study. *Hong Kong Physiotherapy Journal* 2014; **32**(2): 86-91.
186. Labrecque M, Nouwen A, Bergeron M, Rancourt JF. A randomized controlled trial of nonpharmacologic approaches for relief of low back pain during labor. *The Journal of family practice* 1999; **48**(4): 259-63.
187. Laitinen J, Nuutinen L. Failure of transcutaneous electrical nerve stimulation and indomethacin to reduce opiate requirement following cholecystectomy. *Acta anaesthesiologica Scandinavica* 1991; **35**(8): 700-5.
188. Lang T, Barker R, Steinlechner B, et al. TENS relieves acute posttraumatic hip pain during emergency transport. *The Journal of trauma* 2007; **62**(1): 184-8; discussion 8.
189. Langley GB, Sheppard H, Johnson M, Wigley RD. The analgesic effects of transcutaneous electrical nerve stimulation and placebo in chronic pain patients. A double-blind non-crossover comparison. *Rheumatology international* 1984; **4**(3): 119-23.
190. Lauretti GR, Chubaci EF, Mattos AL. Efficacy of the use of two simultaneously TENS devices for fibromyalgia pain. *Rheumatology international* 2013; **33**(8): 2117-22.
191. Lauretti GR, Oliveira R, Parada F, Mattos AL. The New Portable Transcutaneous Electrical Nerve Stimulation Device Was Efficacious in the Control of Primary Dysmenorrhea Cramp Pain. *Neuromodulation : journal of the International Neuromodulation Society* 2015; **18**(6): 522-6; discussion -7.
192. Law PP, Cheing GL. Optimal stimulation frequency of transcutaneous electrical nerve stimulation on people with knee osteoarthritis. *Journal of rehabilitation medicine* 2004; **36**(5): 220-5.
193. Law PPW, Cheing GLY, Tsui AYY. Does transcutaneous electrical nerve stimulation improve the physical performance of people with knee osteoarthritis? *Journal of Clinical Rheumatology* 2004; **10**(6): 295-9.
194. Leandri M, Parodi CI, Corrieri N, Rigardo S. Comparison of TENS treatments in hemiplegic shoulder pain. *Scandinavian journal of rehabilitation medicine* 1990; **22**(2): 69-71.
195. Lee E, Chung I, Lee J, Lam P, Chin R. The role of transcutaneous electrical nerve stimulation in management of labour in obstetric patients. *Asia Oceania J Obstet Gynaecol* 1990; **16**(3): 247-54.
196. Lee CH, Lee TY, Her JS, Liao WL, Hsieh CL. Single-Blinded, Randomized Preliminary Study Evaluating the Effect of Transcutaneous Electrical Nerve Stimulation on Postoperative Pain in Patients with Colles' Fracture. *Journal of alternative and complementary medicine (New York, NY)* 2015; **21**(12): 754-8.
197. Lee JE, Anderson CM, Perkhounkova Y, Sleuwenhoek BM, Louison RR. Transcutaneous Electrical Nerve Stimulation Reduces Resting Pain in Head and Neck Cancer Patients A Randomized and Placebo-Controlled Double-Blind Pilot Study. *Cancer Nursing* 2019; **42**(3): 218-28.
198. Leo KC, Dostal WF, Bossen DG, Eldridge VL, Fairchild ML, Evans RE. Effect of transcutaneous electrical nerve stimulation characteristics on clinical pain. *Physical therapy* 1986; **66**(2): 200-5.

199. Leonard G, Cloutier C, Marchand S. Reduced analgesic effect of acupuncture-like TENS but not conventional TENS in opioid-treated patients. *The journal of pain : official journal of the American Pain Society* 2011; **12**(2): 213-21.
200. Lewers D, Clelland J, Jackson J, Varner R, Bergman J. Transcutaneous electrical nerve stimulation in the relief of primary dysmenorrhea. *Physical therapy* 1989; **69**(1): 3-9.
201. Lewis D, Lewis B, Sturrock R. Transcutaneous electrical nerve stimulation in osteoarthritis: a therapeutic alternative? *Annals of the rheumatic diseases* 1984; **43**(1): 47-9.
202. Lewis B, Lewis D, Cumming G. The comparative analgesic efficacy of transcutaneous electrical nerve stimulation and a non-steroidal anti-inflammatory drug for painful osteoarthritis. *British journal of rheumatology* 1994; **33**(5): 455-60.
203. Likar R, Molnar M, Pipam W, et al. Postoperative transcutaneous electrical nerve stimulation (TENS) in shoulder surgery (randomized, double blind, placebo controlled pilot trial). [German]. *Schmerz (Berlin, Germany)* 2001; **15**(3): 158-63.
204. Lim AT, Edis G, Kranz H, Mendelson G, Selwood T, Scott DF. Postoperative pain control: contribution of psychological factors and transcutaneous electrical stimulation. *Pain* 1983; **17**(2): 179-88.
205. Lima PMB, Farias RTFB, Carvalho ACA, da Silva PNC, Filho NAF, de Brito RF. Transcutaneous electrical nerve stimulation after coronary artery bypass graft surgery. *Brazilian Journal of Cardiovascular Surgery* 2011; **26**(4): 591-6.
206. Limoges MF, Rickabaugh B. Evaluation of TENS during screening flexible sigmoidoscopy. *Gastroenterology nursing : the official journal of the Society of Gastroenterology Nurses and Associates* 2004; **27**(2): 61-8.
207. Lin ML, Luo YJ, Hsu YM, et al. Randomized controlled trial Comparing of Analgesic Effectiveness of TPRF and TENs in Clinical and Endocrinological Changes for Chronic Shoulder Pain; 2015.
208. Lin M-L, Chiu H-W, Shih Z-M, et al. Two Transcutaneous Stimulation Techniques in Shoulder Pain: Transcutaneous Pulsed Radiofrequency (TPRF) versus Transcutaneous Electrical Nerve Stimulation (TENS): A Comparative Pilot Study. *Pain research & management* 2019; **2019**: 2823401.
209. Linde C, Isacsson G, Jonsson BG. Outcome of 6-week treatment with transcutaneous electric nerve stimulation compared with splint on symptomatic temporomandibular joint disk displacement without reduction. *Acta odontologica scandinavica* 1995; **53**(2): 92-8.
210. Linn SL, Granat MH, Lees KR. Prevention of shoulder subluxation after stroke with electrical stimulation. *Stroke* 1999; **30**(5): 963-8.
211. Lison JF, Amer-Cuenca JJ, Piquer-Marti S, Benavent-Caballer V, Bivia-Roig G, Marin-Buck A. Transcutaneous Nerve Stimulation for Pain Relief During Office Hysteroscopy: A Randomized Controlled Trial. *Obstetrics and gynecology* 2017; **129**(2): 363-70.
212. Liu YC, Liao WS, Lien IN. Effect of transcutaneous electrical nerve stimulation for post-thoracotomic pain. *Taiwan I Hsueh Hui Tsa Chih* 1985; **84**(7): 801-9.
213. Liu Y, Dong Z, Wang R, et al. Migraine Prevention Using Different Frequencies of Transcutaneous Occipital Nerve Stimulation: A Randomized Controlled Trial. *The journal of pain : official journal of the American Pain Society* 2017; **18**(8): 1006-15.
214. Lofgren M, Norrbrink C. Pain relief in women with fibromyalgia: a cross-over study of superficial warmth stimulation and transcutaneous electrical nerve stimulation. *Journal of rehabilitation medicine* 2009; **41**(7): 557-62.
215. Luchesa CA, Greca FH, Guarita-Souza LC, Luiz Verde dos Santos J, Aquim EE. The role of electroanalgesia in patients undergoing coronary artery bypass surgery. [Portuguese]. *Brazilian Journal of Cardiovascular Surgery* 2009; **24**(3): 391-6.
216. Lundeberg T. A comparative study of the pain alleviating effect of vibratory stimulation, transcutaneous electrical nerve stimulation, electroacupuncture and placebo. *The American journal of Chinese medicine* 1984; **12**(1-4): 72-9.
217. Lundeberg T, Bondesson L, Lundstrom V. Relief of primary dysmenorrhea by transcutaneous electrical nerve stimulation. *Acta obstetrica et gynecologica Scandinavica* 1985; **64**(6): 491-7.
218. Machado AFP, Perracini MR, Rampazo ÉP, Driusso P, Liebano RE. Effects of thermotherapy and transcutaneous electrical nerve stimulation on patients with primary dysmenorrhea: A randomized, placebo-controlled, double-blind clinical trial. *Complementary therapies in medicine* 2019; **47**: N.PAG.
219. Machin D, Lewith GT, Wylson S. Pain measurement in randomized clinical trials. A comparison of two pain scales. *Clinical Journal of Pain* 1988; **4**(3): 161-8.

220. Mahure SA, Rokito AS, Kwon YW. Transcutaneous electrical nerve stimulation for postoperative pain relief after arthroscopic rotator cuff repair: a prospective double-blinded randomized trial. *Journal of shoulder and elbow surgery* 2017; **26**(9): 1508-13.
221. Manigandan JB, Ganesh GS, Pattnaik M, Mohanty P. Effect of electrical stimulation to long head of biceps in reducing gleno humeral subluxation after stroke. *NeuroRehabilitation* 2014; **34**(2): 245-52.
222. Mannheimer C, Carlsson C. The analgesic effect of transcutaneous electrical nerve stimulation (TENS) in patients with rheumatoid arthritis. A comparative study of different pulse patterns. *Pain* 1979; **6**(3): 329-34.
223. Mannheimer J, Whalen E. The efficacy of transcutaneous electric nerve stimulation in dysmenorrhea. *Clinical Journal of Pain* 1985; **1**: 75-83.
224. Mannheimer C, Lund S, Carlsson CA. The effect of transcutaneous electrical nerve stimulation (TENS) on joint pain in patients with rheumatoid arthritis. *Scandinavian journal of rheumatology* 1978; **7**(1): 13-6.
225. Mannheimer C, Carlsson C, Emanuelsson H, Vedin A, Waagstein F, Wilhelmsson C. The effects of transcutaneous electrical nerve stimulation in patients with severe angina pectoris. *Circulation* 1985; **71**(2): 308-16.
226. Mansourian A, Pourshahidi S, Sadrzadeh-Afshar MS, Ebrahimi H. A Comparative Study of Low-Level Laser Therapy and Transcutaneous Electrical Nerve Stimulation as an Adjunct to Pharmaceutical Therapy for Myofascial Pain Dysfunction Syndrome: A Randomized Clinical Trial. *Frontiers in dentistry* 2019; **16**(4): 256-64.
227. Mansuri B, Torabinezhad F, Jamshidi AA, Dabirmoghaddam P, Vasaghi-Gharamaleki B, Ghelichi L. Application of High-Frequency Transcutaneous Electrical Nerve Stimulation in Muscle Tension Dysphonia Patients With the Pain Complaint: The Immediate Effect. *Journal of Voice* 2019.
228. Mansuri B, Torabinezhad F, Jamshidi AA, Dabirmoghaddam P, Vasaghi-Gharamaleki B, Ghelichi L. Transcutaneous Electrical Nerve Stimulation Combined With Voice Therapy in Women With Muscle Tension Dysphonia. *Journal of Voice* 2020; **34**(3): 490.e11-.e21.
229. Marchand S, Charest J, Li J, Chenard J, Lavignolle B, Laurencelle L. Is TENS purely a placebo effect? A controlled study on chronic low back pain [see comments]. *Pain* 1993; **54**(1): 99-106.
230. Mascarini NC, Vancini RL, Andrade ML, Magalhaes Ede P, de Lira CA, Coimbra IB. Effects of kinesiotherapy, ultrasound and electrotherapy in management of bilateral knee osteoarthritis: prospective clinical trial. *BMC musculoskeletal disorders* 2012; **13**: 182.
231. McCallum M, Glynn C, Moore R, Lammer P, Phillips A. Transcutaneous electrical nerve stimulation in the management of acute postoperative pain. *British journal of anaesthesia* 1988; **61**(3): 308-12.
232. Melzack R, Vetere P, Finch L. Transcutaneous electrical nerve stimulation for low back pain. A comparison of TENS and massage for pain and range of motion. *Physical therapy* 1983; **63**(4): 489-93.
233. Merrill D. Clinical evaluation of FasTENS, an inexpensive, disposable transcutaneous electrical nerve stimulator designed specifically for postoperative electroanalgesia. *Urology* 1989; **33**(1): 27-30.
234. Miller L, Mattison P, Paul L, Wood L. The effects of transcutaneous electrical nerve stimulation (TENS) on spasticity in multiple sclerosis. *Multiple sclerosis (Houndmills, Basingstoke, England)* 2007; **13**(4): 527-33.
235. Milsom I, Hedner N, Mannheimer C. A comparative study of the effect of high-intensity transcutaneous nerve stimulation and oral naproxen on intrauterine pressure and menstrual pain in patients with primary dysmenorrhea. *American journal of obstetrics and gynecology* 1994; **170**(1 Pt 1): 123-9.
236. Moharic M, Marincek C, Vidmar G, Burger H. TRANSCUTANEOUS ELECTRICAL NERVE STIMULATION, PREGABALIN AND THEIR COMBINATION IN PATIENTS WITH PAINFUL DIABETIC NEUROPATHY: EFFECTS ON PAIN AND QUALITY OF LIFE. *Zdravniški Vestnik-Slovenian Medical Journal* 2009; **78**(8): 371-80.
237. Mondal P, Biswas M, Saha J, Middhya AK. Effect of Trigger Point Injection Vs Ultrasonic Therapy Vs Transcutaneous Electrical Nerve Stimulation in Rehabilitation of Cervical and Peri-Scapular Myofascial Pain Syndrome- a Randomized Clinical Trial. *Journal of Evolution of Medical and Dental Sciences-Jemds* 2019; **8**(7): 430-6.
238. Moore SR, Shurman J. Combined neuromuscular electrical stimulation and transcutaneous electrical nerve stimulation for treatment of chronic back pain: a double-blind, repeated measures comparison. *Archives of physical medicine and rehabilitation* 1997; **78**(1): 55-60.

239. Mora B, Giorni E, Dobrovits M, et al. Transcutaneous electrical nerve stimulation: an effective treatment for pain caused by renal colic in emergency care. *The Journal of urology* 2006; **175**(5): 1737-41; discussion 41.
240. Morgan B, Jones AR, Mulcahy KA, Finlay DB, Collett B. Transcutaneous electric nerve stimulation (TENS) during distension shoulder arthrography: a controlled trial. *Pain* 1996; **64**(2): 265-7.
241. Møystad A, Krogstad BS, Larheim TA. Transcutaneous nerve stimulation in a group of patients with rheumatic disease involving the temporomandibular joint. *Journal of prosthetic dentistry* 1990; **64**(5): 596-600.
242. Murray S, Collins PD, James MA. An investigation into the 'carry over' effect of neurostimulation in the treatment of angina pectoris. *International journal of clinical practice* 2004; **58**(7): 669-74.
243. Mutlu B, Paker N, Bugdayci D, Tekdos D, Kesiktaş N. Efficacy of supervised exercise combined with transcutaneous electrical nerve stimulation in women with fibromyalgia: a prospective controlled study. *Rheumatology international* 2013; **33**(3): 649-55.
244. Nabi BN, Sedighinejad A, Haghighi M, et al. Comparison of transcutaneous electrical nerve stimulation and pulsed radiofrequency sympathectomy for treating painful diabetic neuropathy. 2015; **5**(5).
245. Nash TP, Williams JD, Machin D. TENS: Does the type of stimulus really matter? *Pain Clinic* 1990; **3**(3): 161-8.
246. Navarathnam RG, Wang IY, Thomas D, Klineberg PL. Evaluation of the transcutaneous electrical nerve stimulator for postoperative analgesia following cardiac surgery. *Anaesthesia and intensive care* 1984; **12**(4): 345-50.
247. Neary J. Transcutaneous electrical nerve stimulation for the relief of post-incisional surgical pain. *AANA J* 1981; **49**(2): 151-5.
248. Neighbours LE, Clelland J, Jackson JR, Bergman J, Orr J. Transcutaneous electrical nerve stimulation for pain relief in primary dysmenorrhea. *The Clinical journal of pain* 1987; **3**(1): 17-22.
249. Nesheim BI. The use of transcutaneous nerve stimulation for pain relief during labor. A controlled clinical study. *Acta obstetrica et gynecologica Scandinavica* 1981; **60**(1): 13-6.
250. Neumark J, Pauser G, Scherzer W. Pain relief in childbirth; an analysis of the analgesic effects of transcutaneous nerve stimulation (TNS), pethidine and placebos (author's transl). *Praktische anesthesie, wiederbelebung und intensivtherapie* 1978; **13**(1): 13-20.
251. Ng MM, Leung MC, Poon DM. The effects of electro-acupuncture and transcutaneous electrical nerve stimulation on patients with painful osteoarthritic knees: a randomized controlled trial with follow-up evaluation. *Journal of alternative and complementary medicine (New York, NY)* 2003; **9**(5): 641-9.
252. Nordemar R, Thorner C. Treatment of acute cervical pain - A comparative group study. *Pain* 1981; **10**(1): 93-101.
253. Norrbrink C. Transcutaneous electrical nerve stimulation for treatment of spinal cord injury neuropathic pain. *Journal of rehabilitation research and development* 2009; **46**(1): 85-93.
254. Olsén MF, Elden H, Janson ED, Lilja H, Stener-Victorin E. A comparison of high- versus low-intensity, high-frequency transcutaneous electric nerve stimulation for painful postpartum uterine contractions. *Acta obstetrica et gynecologica Scandinavica* 2007; **86**(3): 310-4.
255. Fagevik Olsen M, Bjoerndahl S, Stahl A, Borjesson S, Sundemo A, Gutke A. Effects of high-intensity high-frequency transcutaneous electric nerve stimulation in primary dysmenorrhea-a randomised cross-over pilot study. *European Journal of Physiotherapy* 2019.
256. Oncel M, Sencan S, Yildiz H, Kurt N. Transcutaneous electrical nerve stimulation for pain management in patients with uncomplicated minor rib fractures. *European journal of cardio-thoracic surgery : official journal of the European Association for Cardio-thoracic Surgery* 2002; **22**(1): 13-7.
257. Oosterhof J, De Boo TM, Oostendorp RA, Wilder-Smith OH, Crul BJ. Outcome of transcutaneous electrical nerve stimulation in chronic pain: short-term results of a double-blind, randomised, placebo-controlled trial. *The journal of headache and pain* 2006; **7**(4): 196-205.
258. Oosterhof J, Samwel HJ, de Boo TM, Wilder-Smith OH, Oostendorp RA, Crul BJ. Predicting outcome of TENS in chronic pain: a prospective, randomized, placebo controlled trial. *Pain* 2008; **136**(1-2): 11-20.
259. Oosterhof J, Wilder-Smith OH, de Boo T, Oostendorp RA, Crul BJ. The long-term outcome of transcutaneous electrical nerve stimulation in the treatment for patients with chronic pain: a randomized, placebo-controlled trial. *Pain practice : the official journal of World Institute of Pain* 2012; **12**(7): 513-22.

260. Oosterhof J, Wilder-Smith OH, Oostendorp RA, Crul BJ. Different mechanisms for the short-term effects of real versus sham transcutaneous electrical nerve stimulation (TENS) in patients with chronic pain: a pilot study. *Journal of pain & palliative care pharmacotherapy* 2012; **26**(1): 5-12.
261. Ordog GJ. Transcutaneous electrical nerve stimulation versus oral analgesic: a randomized double-blind controlled study in acute traumatic pain. *The American journal of emergency medicine* 1987; **5**(1): 6-10.
262. Ozkaraoglu DK, Tarakci D, Algun ZC. Comparison of two different electrotherapy methods in low back pain treatment. *Journal of Back & Musculoskeletal Rehabilitation* 2020; **33**(2): 193-9.
263. Ozkul C, Kilinc M, Yildirim SA, Topcuoglu EY, Akyuz M. Effects of visual illusion and transcutaneous electrical nerve stimulation on neuropathic pain in patients with spinal cord injury: A randomised controlled cross-over trial. *Journal of back and musculoskeletal rehabilitation* 2015; **28**(4): 709-19.
264. Oztas B, Iyigun E. The effects of two different electrical stimulation methods on the pain intensity of the patients who had undergone abdominal surgery with a midline incision: Randomized Controlled Clinical Trial. *Contemporary nurse* 2019: 1-21.
265. Ozturk NK, Baki ED, Kavakli AS, et al. Comparison of Transcutaneous Electrical Nerve Stimulation and Parasternal Block for Postoperative Pain Management after Cardiac Surgery. *Pain research & management* 2016; **2016**: 4261949.
266. Padma, Prasanna A, Urala. Transcutaneous electrical nerve stimulation and labor pain. *Bahrain Medical Bulletin* 2000; **22**(1): 13-7.
267. Paker N, Tekdos D, Kesiktas N, Soy D. Comparison of the therapeutic efficacy of TENS versus intra-articular hyaluronic acid injection in patients with knee osteoarthritis: a prospective randomized study. *Advances in therapy* 2006; **23**(2): 342-53.
268. Palmer S, Domaille M, Cramp F, et al. Transcutaneous electrical nerve stimulation as an adjunct to education and exercise for knee osteoarthritis: a randomized controlled trial. *Arthritis care & research* 2014; **66**(3): 387-94.
269. Pan P, Chou C, Chiou H, Ma H, Lee H, Chan R. Extracorporeal shock wave therapy for chronic calcific tendinitis of the shoulders: a functional and sonographic study. *Archives of Physical Medicine & Rehabilitation* 2003; **84**(7): 988-93.
270. Park C, Choi JB, Lee YS, et al. The effect of intra-operative transcutaneous electrical nerve stimulation on posterior neck pain following thyroidectomy. *Anaesthesia* 2015; **70**(4): 434-9.
271. Patil SR, Aileni KR. Effect of transcutaneous electrical nerve stimulation versus home exercise programme in management of temporomandibular joint disorder. *Journal of Clinical and Diagnostic Research* 2017; **11**(12): ZC19-ZC22.
272. Peacock KS, Stoerkel E, Libretto S, et al. A randomized trial comparing the Tennant Biomodulator to transcutaneous electrical nerve stimulation and traditional Chinese acupuncture for the treatment of chronic pain in military service members. *Military Medical Research* 2019; **6**(1): 37.
273. Pietrosimone BG, Hart JM, Saliba SA, Hertel J, Ingersoll CD. Immediate effects of transcutaneous electrical nerve stimulation and focal knee joint cooling on quadriceps activation. *Medicine and science in sports and exercise* 2009; **41**(6): 1175-81.
274. Pietrosimone BG, Saliba SA, Hart JM, Hertel J, Kerrigan DC, Ingersoll CD. Effects of transcutaneous electrical nerve stimulation and therapeutic exercise on quadriceps activation in people with tibiofemoral osteoarthritis. *The Journal of orthopaedic and sports physical therapy* 2011; **41**(1): 4-12.
275. Pietrosimone BG, Saliba SA, Hart JM, Hertel J, Kerrigan DC, Ingersoll CD. Effects of disinhibitory transcutaneous electrical nerve stimulation and therapeutic exercise on sagittal plane peak knee kinematics and kinetics in people with knee osteoarthritis during gait: a randomized controlled trial. *Clinical rehabilitation* 2010; **24**(12): 1091-101.
276. Pietrosimone B, Luc-Harkey BA, Harkey MS, et al. Using TENS to Enhance Therapeutic Exercise in Individuals with Knee Osteoarthritis. *Medicine and science in sports and exercise* 2020.
277. Pike PM. Transcutaneous electrical stimulation. Its use in the management of postoperative pain. *Anaesthesia* 1978; **33**(2): 165-71.
278. Pitangui AC, de Sousa L, Gomes FA, Ferreira CH, Nakano AM. High-frequency TENS in post-episiotomy pain relief in primiparous puerpere: a randomized, controlled trial. *The journal of obstetrics and gynaecology research* 2012; **38**(7): 980-7.
279. Pitangui AC, Araújo RC, Bezerra MJ, Ribeiro CO, Nakano AM. Low and high-frequency TENS in post-episiotomy pain relief: a randomized, double-blind clinical trial. *Brazilian journal of physical therapy* 2014; **18**(1): 72-8.

280. Platon B, Andrell P, Raner C, Rudolph M, Dvoretzky A, Mannheimer C. High-frequency, high-intensity transcutaneous electrical nerve stimulation as treatment of pain after surgical abortion. *Pain* 2010; **148**(1): 114-9.
281. Platon B, Mannheimer C, Andrell P. Effects of high-frequency, high-intensity transcutaneous electrical nerve stimulation versus intravenous opioids for pain relief after gynecologic laparoscopic surgery: a randomized controlled study. *Korean Journal of Anesthesiology* 2018; **71**(2): 149-56.
282. Prabhakar R, Ramteke G. Cervical Spinal Mobilization Versus TENS in the Management of Cervical Radiculopathy: A Comparative, Experimental, Randomized controlled trial. *Indian Journal of Physiotherapy and Occupational Therapy* 2011; **5**(2): 128-33.
283. Presser M, Birkhan J, Adler R, Hanani A, Eisenberg E. Transcutaneous electrical nerve stimulation (TENS) during epidural steroids injection: a randomized controlled trial. *Pain Clinic* 2000; **12**(2): 77-80.
284. Rainov NG, Heidecke V, Albertz C, Burkert W. Transcutaneous electrical nerve stimulation (TENS) for acute postoperative pain after spinal surgery. *European Journal of Pain* 1994; **15**(2-3): 44-9.
285. Rajfur J, Pasternok M, Rajfur K, et al. Efficacy of Selected Electrical Therapies on Chronic Low Back Pain: a Comparative Clinical Pilot Study. *Medical science monitor* 2017; **23**: 85-100.
286. Rajpurohit B, Khatri SM, Metgud D, Bagewadi A. Effectiveness of transcutaneous electrical nerve stimulation and microcurrent electrical nerve stimulation in bruxism associated with masticatory muscle pain--a comparative study. *Indian journal of dental research : official publication of Indian Society for Dental Research* 2010; **21**(1): 104-6.
287. Rakel B, Frantz R. Effectiveness of transcutaneous electrical nerve stimulation on postoperative pain with movement. *The journal of pain : official journal of the American Pain Society* 2003; **4**(8): 455-64.
288. Rakel BA, Zimmerman MB, Geasland K, et al. Transcutaneous electrical nerve stimulation for the control of pain during rehabilitation after total knee arthroplasty: A randomized, blinded, placebo-controlled trial. *Pain* 2014; **155**(12): 2599-611.
289. Ramanathan D, Saleh A, Klika AK, Higuera CA, Barsoum WK. The Use of Transcutaneous Electrical Nerve Stimulation After Total Knee Arthroplasty: A Prospective Randomized Controlled Trial. *Surgical technology international* 2017; **30**: 425-34.
290. Ramos LAV, Callegari B, Franca FJR, et al. Comparison Between Transcutaneous Electrical Nerve Stimulation and Stabilization Exercises in Fatigue and Transversus Abdominis Activation in Patients With Lumbar Disk Herniation: A Randomized Study. *Journal of manipulative and physiological therapeutics* 2018; **41**(4): 323-31.
291. Rani P, Kalyani V, Goyal T, Yadav R, Mishra R. Effect of Transcutaneous Electrical Nerve Stimulation Therapy on Pain and Functional Disability Level among Patients with Rotator Cuff Disease- a Randomized Controlled Trial. *International Journal of Physiotherapy* 2020; **7**(1): 7-13.
292. Ratajczak B, Hawrylak A, Demidaś A, Kuciel-Lewandowska J, Boerner E. Effectiveness of diadynamic currents and transcutaneous electrical nerve stimulation in disc disease lumbar part of spine. *Journal of Back & Musculoskeletal Rehabilitation* 2011; **24**(3): 155-9.
293. Rawat B, Genz A, Fache JS, Ong M, Coldman AJ, Burhenne HJ. Effectiveness of transcutaneous electrical nerve stimulation (TENS) for analgesia during biliary lithotripsy. *Invest Radiol* 1991; **26**(10): 866-9.
294. Renovato França FJ, Nogueira Burke T, Oliveira Magalhães M, et al. Motor Control Training Compared With Transcutaneous Electrical Nerve Stimulation in Patients With Disc Herniation With Associated Radiculopathy: A Randomized Controlled Trial. *American journal of physical medicine & rehabilitation* 2019; **98**(3): 207-14.
295. Reuss R, Cronen P, Abplanalp L. Transcutaneous electrical nerve stimulation for pain control after cholecystectomy: lack of expected benefits. *Southern medical journal* 1988; **81**(11): 1361-3.
296. Revadkar MT, Bhojwani TM. Comparison of the Effectiveness of Transcutaneous Electrical Nerve Stimulation (Tens) Vs. Interferential Therapy (Ift) for Relief of Pain in Primary Dysmenorrhea. *International Journal of Physiotherapy* 2019; **6**(6): 263-7.
297. Ringel G, Taubert K. Zur effektivitat der transkutanen elektrischen nervenstimulation bei migrane (The efficacy of transcutaneous nerve stimulation in migraine) [German]. *Zeitschrift fur Physiotherapie* 1991 Jan; **43**(1): 8-11 1991.

298. Robb KA, Newham DJ, Williams JE. Transcutaneous electrical nerve stimulation vs. transcutaneous spinal electroanalgesia for chronic pain associated with breast cancer treatments. *Journal of pain and symptom management* 2007; **33**(4): 410-9.
299. Robinson R, Darlow S, Wright SJ, et al. Is transcutaneous electrical nerve stimulation an effective analgesia during colonoscopy? *Postgraduate medical journal* 2001; **77**(909): 445-6.
300. Roche PA, Gijsbers K, Belch JJ, Forbes CD. Modification of haemophilic haemorrhage pain by transcutaneous electrical nerve stimulation. *Pain* 1985; **21**(1): 43-8.
301. Rooney SM, Jain S, Goldiner PL. Effect of transcutaneous nervous stimulation on postoperative pain after thoracotomy. *Anesthesia and analgesia* 1983; **62**(11): 1010-2.
302. Rosenberg M, Curtis L, Bourke D. Transcutaneous electrical nerve stimulation for the relief of postoperative pain. *Pain* 1978; **5**(2): 129-33.
303. Rutgers MJ, Van-Romunde L, Osman P. A small randomised comparative trial of acupuncture versus transcutaneous electrical neurostimulation in postherpetic neuralgia. *Pain Clinic* 1988; **2**: 87-9.
304. Sadala AY, Machado AFP, Liebano RE. Effects of transcutaneous electrical nerve stimulation on pain intensity during application of carboxytherapy in patients with cellulite: A randomized placebo-controlled trial. *Journal of cosmetic dermatology* 2018; **17**(6): 1175-81.
305. Sahin N, Albayrak I, Ugurlu H. Effect of different transcutaneous electrical stimulation modalities on cervical myofascial pain syndrome. *Journal of Musculoskeletal Pain* 2011; **19**(1): 18-23.
306. Samadzadeh S, Rezavand N, Yari M, Rezaei M, Faizmahdavi H, Hematti M. Comparison of Entonox and Transcutaneous Electrical Nerve Stimulation (TENS) in labor pain. *Journal of Medical and Biomedical Sciences* 2017; **6**(2): 11-6.
307. Sangtong K, Chupinijrobkob C, Putthakumnerd W, Kuptniratsaikul V. Does adding transcutaneous electrical nerve stimulation to therapeutic ultrasound affect pain or function in people with osteoarthritis of the knee? A randomized controlled trial. *Clinical rehabilitation* 2019; **33**(7): 1197-205.
308. Santamato A, Notarnicola A, Panza F, et al. SBOTE study: Extracorporeal shock wave therapy versus electrical stimulation after botulinum toxin type a injection for post-stroke spasticity-a prospective randomized trial. *Ultrasound in Medicine and Biology* 2013; **39**(2): 283-91.
309. Santana LS, Gallo RB, Ferreira CH, Duarte G, Quintana SM, Marcolin AC. Transcutaneous electrical nerve stimulation (TENS) reduces pain and postpones the need for pharmacological analgesia during labour: a randomised trial. *Journal of physiotherapy* 2016; **62**(1): 29-34.
310. Saranya B, Ahmed J, Shenoy N, Ongole R, Sujir N, Natarajan S. Comparison of Transcutaneous Electric Nerve Stimulation (TENS) and Microcurrent Nerve Stimulation (MENS) in the Management of Masticatory Muscle Pain: A Comparative Study. *Pain research & management* 2019; **2019**: 8291624.
311. Sayilir S, Yildizgoren MT. The medium-term effects of diadynamic currents in chronic low back pain; TENS versus diadynamic currents: a randomised, follow-up study. *Complementary therapies in clinical practice* 2017; **29**: 16-9.
312. Seo HG, Bang MS, Chung SG, Jung SH, Lee S-U. Effect of Electrical Stimulation on Botulinum Toxin A Therapy in Patients With Chronic Myofascial Pain Syndrome: A 16-Week Randomized Double-Blinded Study. *Archives of Physical Medicine & Rehabilitation* 2013; **94**(3): 412-8.
313. Serry ZMH, Mossa G, Elhabashy H, et al. Transcutaneous nerve stimulation versus aerobic exercise in diabetic neuropathy. *Egyptian Journal of Neurology, Psychiatry and Neurosurgery* 2016; **53**(2): 124-9.
314. Sezen CB, Akboga SA, Celik A, Kalafat CE, Tastepe AI. Transcutaneous electrical nerve stimulation effect on postoperative complications. *Asian cardiovascular & thoracic annals* 2017; **25**(4): 276-80.
315. Shahoei R, Shahghebi S, Rezaei M, Naqshbandi S. The effect of transcutaneous electrical nerve stimulation on the severity of labor pain among nulliparous women: A clinical trial. *Complementary therapies in clinical practice* 2017; **28**: 176-80.
316. Shehab D, Adham N. Comparative effectiveness of ultrasound and transcutaneous electrical stimulation in treatment of periarticular shoulder pain. *Physiother Can* 2000; **52**(3): 208-14.
317. Sherry E, Kitchener P, Smart R. A prospective randomized controlled study of VAX-D and TENS for the treatment of chronic low back pain. *Neurological research* 2001; **23**(7): 780-4.



318. Shimoji K, Takahashi N, Nishio Y, Koyanagi M, Aida S. Pain relief by transcutaneous electric nerve stimulation with bidirectional modulated sine waves in patients with chronic back pain: a randomized, double-blind, sham-controlled study. *Neuromodulation* 2007 Jan;10(1):42-51 2007.
319. Shimoura K, Iijima H, Suzuki Y, Aoyama T. Immediate Effects of Transcutaneous Electrical Nerve Stimulation on Pain and Physical Performance in Individuals With Preradiographic Knee Osteoarthritis: A Randomized Controlled Trial. *Archives of Physical Medicine & Rehabilitation* 2019; **100**(2): 300-.
320. Shoukry RA, Al-Ansary AM. Transcutaneous Electric Nerve Stimulation (TENS) for pain relief during Extracorporeal Shock-Wave Lithotripsy (ESWL). *Egyptian Journal of Anaesthesia* 2019; **35**(1): 65-70.
321. Siemens W, Boehlke C, Bennett MI, Offner K, Becker G, Gaertner J. Transcutaneous electrical nerve stimulation for advanced cancer pain inpatients in specialist palliative care—a blinded, randomized, sham-controlled pilot cross-over trial. *Supportive Care in Cancer* 2020.
322. Sikiru L, Shmaila H, Muhammed SA. Transcutaneous electrical nerve stimulation (TENS) in the symptomatic management of chronic prostatitis/chronic pelvic pain syndrome: a placebo-control randomized trial. *International braz j urol : official journal of the Brazilian Society of Urology* 2008; **34**(6): 708-13; discussion 14.
323. Silva MB, de Melo PR, de Oliveira NM, Crema E, Fernandes LF. Analgesic effect of transcutaneous electrical nerve stimulation after laparoscopic cholecystectomy. *American journal of physical medicine & rehabilitation* 2012; **91**(8): 652-7.
324. Silva JG, Gonçalves Santana C, Inocencio KR, Orsini M, Machado S, Bergmann A. Electrocortical Analysis of Patients with Intercostobrachial Pain Treated with TENS after Breast Cancer Surgery. *Journal of Physical Therapy Science* 2014; **26**(3): 349-53.
325. Sim DT. Effectiveness of transcutaneous electrical nerve stimulation following cholecystectomy. *Physiotherapy* 1991; **77**(10): 715-22.
326. Siqueira LTD, Ribeiro VV, Moreira PAM, Brasolotto AG, de Jesus Guirro RR, Alves Silverio KC. Effects of transcutaneous electrical nervous stimulation (TENS) associated with vocal therapy on musculoskeletal pain of women with behavioral dysphonia: A randomized, placebo-controlled double-blind clinical trial. *Journal of communication disorders* 2019; **82**: N.PAG.
327. Sloan JP, Muwanga CL, Waters EA, Dove AF, Dave SH. Multiple rib fractures: transcutaneous nerve stimulation versus conventional analgesia. *The Journal of trauma* 1986; **26**(12): 1120-2.
328. Smania N, Corato E, Fiaschi A, Pietropoli P, Aglioti SM, Tinazzi M. Repetitive magnetic stimulation: a novel therapeutic approach for myofascial pain syndrome. *Journal of neurology* 2005; **252**(3): 307-14.
329. Smedley F, Taube M, Wastell C. Transcutaneous electrical nerve stimulation for pain relief following inguinal hernia repair: a controlled trial. *European surgical research Europäische chirurgische Forschung Recherches chirurgicales europeennes* 1988; **20**(4): 233-7.
330. Smith C, Lewith G, Machin D. Preliminary study to establish a controlled method of assessing transcutaneous nerve stimulation as a treatment for the pain caused by osteoarthritis of the knee. *Physiotherapy* 1983; **69**: 266-8.
331. Smith C, Guralnick M, Gelfand M, Jeans M. The effects of transcutaneous electrical nerve stimulation on post-cesarean pain. *Pain* 1986; **27**(2): 181-93.
332. Sodipo JO, Adedeji SA, Olumide O. Postoperative pain relief by transcutaneous electrical nerve stimulation (TENS). *The American journal of Chinese medicine* 1980; **8**(1-2): 190-4.
333. Solak O, Turna A, Pekcolaklar A, Metin M, Sayar A, Gurses A. Transcutaneous electric nerve stimulation for the treatment of postthoracotomy pain: a randomized prospective study. *The Thoracic and cardiovascular surgeon* 2007; **55**(3): 182-5.
334. Solak O, Emmiler M, Ela Y, et al. Comparison of continuous and intermittent transcutaneous electrical nerve stimulation in postoperative pain management after coronary artery bypass grafting: A randomized, placebo-controlled prospective study. *Heart Surgery Forum* 2009; **12**(5): E266-E71.
335. Sonde L, Gip C, Fernaeus SE, Nilsson CG, Viitanen M. Stimulation with low frequency (1.7 Hz) transcutaneous electric nerve stimulation (low-tens) increases motor function of the post-stroke paretic arm. *Scandinavian journal of rehabilitation medicine* 1998; **30**(2): 95-9.
336. Stepanovic A, Kolsek M, Kersnik J, Erculj V. Prevention of post-herpetic neuralgia using transcutaneous electrical nerve stimulation. *Wiener klinische Wochenschrift* 2015; **127**(9-10): 369-74.
337. Steptoe P, Bo JO. Pain-relieving effect of transcutaneous nerve stimulation during delivery. A study among primiparas. *Ugeskrift for laeger* 1984; **146**(42): 3186-8.
338. Stratton S, Smith M. Postoperative thoracotomy. Effect of transcutaneous electrical nerve stimulation on forced vital capacity. *Physical therapy* 1980; **60**(1): 45-7.

339. Stubbing JF, Jellicoe JA. Transcutaneous electrical nerve stimulation after thoracotomy. Pain relief and peak expiratory flow rate--a trial of transcutaneous electrical nerve stimulation. *Anaesthesia* 1988; **43**(4): 296-8.
340. Suh HR, Kim TH, Han GS. The Effects of High-Frequency Transcutaneous Electrical Nerve Stimulation for Dental Professionals with Work-Related Musculoskeletal Disorders: A Single-Blind Randomized Placebo-Controlled Trial. *Evidence-Based Complementary and Alternative Medicine* 2015.
341. Talbot LA, Solomon Z, Webb L, Morrell C, Metter EJ. Electrical Stimulation Therapies for Active Duty Military with Patellofemoral Pain Syndrome: A Randomized Trial. *Military medicine* 2020.
342. Tantawy SA, Kamel DM, Abdelbasset WK. Does transcutaneous electrical nerve stimulation reduce pain and improve quality of life in patients with idiopathic chronic orchialgia? A randomized controlled trial. *Journal of Pain Research* 2018; **11**: 77-82.
343. Taylor P, Hallett M, Flaherty L. Treatment of osteoarthritis of the knee with transcutaneous electrical nerve stimulation. *Pain* 1981; **11**(2): 233-40.
344. Taylor A, West B, Simon B, Skelton J, Rowlingson J. How effective is TENS for acute pain? *Am J Nurs* 1983; **83**(8): 1171-4.
345. Thakur R, Patidar RJOGI. Comparative study of transcutaneous electrical nerve stimulation (TENS) and tramadol hydrochloride for pain relief in labor. 2004; **54**(4): 346-50.
346. Thomas IL, Tyle V, Webster J, Neilson A. An evaluation of transcutaneous electrical nerve stimulation for pain relief in labour. *The Australian & New Zealand journal of obstetrics & gynaecology* 1988; **28**(3): 182-9.
347. Thomas M, Lundeberg T, Bjork G, Lundstrom-Lindstedt V. Pain and discomfort in primary dysmenorrhea is reduced by preemptive acupuncture or low frequency TENS. *European Journal of Physical Medicine and Rehabilitation* 1995; **5**(3): 71-6.
348. Thorsteinsson G, Stonnington HH, Stillwell GK, Elveback LR. The placebo effect of transcutaneous electrical stimulation. *Pain* 1978; **5**(1): 31-41.
349. Tilak M, Isaac SA, Fletcher J, et al. Mirror Therapy and Transcutaneous Electrical Nerve Stimulation for Management of Phantom Limb Pain in Amputees - A Single Blinded Randomized Controlled Trial. *Physiotherapy research international : the journal for researchers and clinicians in physical therapy* 2016; **21**(2): 109-15.
350. Tokuda M, Tabira K, Masuda T, Nishiwada T, Shomoto K. Effect of modulated-frequency and modulated-intensity transcutaneous electrical nerve stimulation after abdominal surgery: a randomized controlled trial. *The Clinical journal of pain* 2014; **30**(7): 565-70.
351. Tonella RM, Araujo S, Da Silva AMO. Transcutaneous electrical nerve stimulation in the relief of pain related to physical therapy after abdominal surgery. [Portuguese, English]. *Revista brasileira de anesthesiologia* 2006; **56**(6): 630-42.
352. Topuz O, Ozfidan E, Ozgen M, Ardic F. Efficacy of transcutaneous electrical nerve stimulation and percutaneous neuromodulation therapy in chronic low back pain. *Journal of back and musculoskeletal rehabilitation* 2004; **17**(3-4): 127-33.
353. Tosato J, Biasotto-Gonzalez D, Caria PJFP. Effect of massage therapy and of transcutaneous electrical nerve stimulation on pain and electro-tomyographic activity in patients with temporomandibular dysfunction. 2007; **14**: 21-6.
354. Treacy K. Awareness/relaxation training and transcutaneous electrical neural stimulation in the treatment of bruxism. *Journal of oral rehabilitation* 1999; **26**(4): 280-7.
355. Tsen LC, Thomas J, Segal S, Datta S, Bader AM. Transcutaneous electrical nerve stimulation does not augment combined spinal epidural labour analgesia. *Canadian journal of anaesthesia = Journal canadien d'anesthesie* 2000; **47**(1): 38-42.
356. Tsen LC, Thomas J, Segal S, Datta S, Bader AM. Transcutaneous electrical nerve stimulation does not augment epidural labor analgesia. *Journal of clinical anesthesia* 2001; **13**(8): 571-5.
357. Tsukayama H, Yamashita H, Amagai H, Tanno Y. Randomised controlled trial comparing the effectiveness of electroacupuncture and TENS for low back pain: a preliminary study for a pragmatic trial. *Acupuncture in medicine : journal of the British Medical Acupuncture Society* 2002; **20**(4): 175-80.
358. Tucker DL, Rockett M, Hasan M, Poplar S, Rule SA. Does transcutaneous electrical nerve stimulation (TENS) alleviate the pain experienced during bone marrow sampling in addition to standard techniques? A randomised, double-blinded, controlled trial. *Journal of clinical pathology* 2015; **68**(6): 479-83.
359. Tugay N, Akbayrak T, Demirturk F, et al. Effectiveness of transcutaneous electrical nerve stimulation and interferential current in primary dysmenorrhea. *Pain medicine (Malden, Mass)* 2007; **8**(4): 295-300.

360. Tulgar M, McGlone F, Bowsher D, Miles JB. Comparative effectiveness of different stimulation modes in relieving pain. Part I. A pilot study. *Pain* 1991; **47**(2): 151-5.
361. Tulgar M, McGlone F, Bowsher D, Miles JB. Comparative effectiveness of different stimulation modes in relieving pain. Part II. A double-blind controlled long-term clinical trial. *Pain* 1991; **47**(2): 157-62.
362. Unterrainer AF, Friedrich C, Krenn MH, Piotrowski WP, Golaszewski SM, Hitzl W. Postoperative and preincisional electrical nerve stimulation TENS reduce postoperative opioid requirement after major spinal surgery. *Journal of neurosurgical anesthesiology* 2010; **22**(1): 1-5.
363. Unterrainer AF, Uebleis FX, Gross FA, Werner GG, Krombholz MA, Hitzl W. TENS compared to opioids in postoperative analgesic therapy after major spinal surgery with regard to cognitive function. *Middle east journal of anaesthesiology* 2012; **21**(6): 815-21.
364. Upton GA, Tinley P, Al-Aubaidy H, Crawford R. The influence of transcutaneous electrical nerve stimulation parameters on the level of pain perceived by participants with painful diabetic neuropathy: A crossover study. *Diabetes & metabolic syndrome* 2017; **11**(2): 113-8.
365. Vaidya SM. Sacroiliac joint mobilisation versus transcutaneous electrical nerve stimulation for pregnancy induced posterior pelvic pain-a randomised clinical trial. *Journal of Clinical and Diagnostic Research* 2018; **12**(1): YC04-YC7.
366. Vaillancourt S, Coulombe-Lévêque A, Fradette J, et al. Combining transcutaneous electrical nerve stimulation with therapeutic exercise to reduce pain in an elderly population: a pilot study. *Disability and rehabilitation* 2019: 1-8.
367. Valenza MC, Torres-Sanchez I, Cabrera-Martos I, Valenza-Demet G, Cano-Cappellacci M. Acute Effects of Contract-Relax Stretching vs. TENS in Young Subjects With Anterior Knee Pain: A Randomized Controlled Trial. *Journal of strength and conditioning research* 2016; **30**(8): 2271-8.
368. van der Ploeg JM, Vervest HA, Liem AL, Schagen van Leeuwen JH. Transcutaneous nerve stimulation (TENS) during the first stage of labour: a randomized clinical trial. *Pain* 1996; **68**(1): 75-8.
369. van der Spank JT, Cambier DC, De\_Paeppe HM, Danneels LA, Witvrouw EE, Beerens L. Pain relief in labour by transcutaneous electrical nerve stimulation (TENS). *Archives of gynecology and obstetrics* 2000; **264**(3): 131-6.
370. Vance CG, Rakel BA, Blodgett NP, et al. Effects of transcutaneous electrical nerve stimulation on pain, pain sensitivity, and function in people with knee osteoarthritis: a randomized controlled trial. *Physical therapy* 2012; **92**(7): 898-910.
371. Vitalii C, Oleg P. The efficiency of transcutaneous electrical nerve stimulation in association with gabapentin in the treatment of neuropathic pain in patients with spinal cord injury. *Romanian Journal of Neurology/ Revista Romana de Neurologie* 2014; **13**(4): 193-6.
372. Vrouva S, Batistaki C, Paraskevaidou E, et al. Comparative study of pain relief in two non-pharmacological treatments in patients with partial rotator cuff tears: A randomized trial. *Anesthesiology and Pain Medicine* 2019; **9**(2).
373. Walker RH, Morris BA, Angulo DL, Schneider J, Colwell CW, Jr. Postoperative use of continuous passive motion, transcutaneous electrical nerve stimulation, and continuous cooling pad following total knee arthroplasty. *The Journal of arthroplasty* 1991; **6**(2): 151-6.
374. Wang SF, Lee JP, Hwa HL. Effect of transcutaneous electrical nerve stimulation on primary dysmenorrhea. *Neuromodulation : journal of the International Neuromodulation Society* 2009; **12**(4): 302-9.
375. Warfield CA, Stein JM, Frank HA. The effect of transcutaneous electrical nerve stimulation on pain after thoracotomy. *The Annals of thoracic surgery* 1985; **39**(5): 462-5.
376. Warke K, Al-Smadi J, Baxter GD, Walsh DM, Lowe-Strong AS. A double blind, placebo controlled, randomised, clinical trial investigating the efficacy of transcutaneous electrical nerve stimulation for low back pain in a multiple sclerosis population. *Multiple Sclerosis* 2004; **10**(7032): S107-S.
377. Warke K, Al-Smadi J, Baxter D, Walsh D, Lowe-Strong A. Efficacy of transcutaneous electrical nerve stimulation (tens) for chronic low-back pain in a multiple sclerosis population: a randomized, placebo-controlled clinical trial. *Clinical Journal of Pain* 2006; **22**(9): 812-9.
378. Yameen F, Shahbaz NN, Hasan Y, Fauz R, Abdullah M. Efficacy of transcutaneous electrical nerve stimulation and its different modes in patients with trigeminal neuralgia. *JPMA The Journal of the Pakistan Medical Association* 2011; **61**(5): 437-9.

379. Yesil H, Hepguler S, Dundar U, Taravati S, Isleten B. Does the Use of Electrotherapies Increase the Effectiveness of Neck Stabilization Exercises for Improving Pain, Disability, Mood, and Quality of Life in Chronic Neck Pain?: A Randomized, Controlled, Single-Blind Study. *Spine* 2018; **43**(20): E1174-e83.
380. Yilmaz M, Tarakci D, Tarakci E. Comparison of high-intensity laser therapy and combination of ultrasound treatment and transcutaneous nerve stimulation on cervical pain associated with cervical disc herniation: A randomized trial. *Complementary therapies in medicine* 2020; **49**: 102295.
381. Yilmazer M, Kose S, Arioiz DT, Koken G, Ozbulut O. Efficacy of transcutaneous electrical nerve stimulation for pain relief in women undergoing office endometrial biopsy. *Archives of gynecology and obstetrics* 2012; **285**(4): 1059-64.
382. Yokoyama M, Sun X, Oku S, et al. Comparison of percutaneous electrical nerve stimulation with transcutaneous electrical nerve stimulation for long-term pain relief in patients with chronic low back pain. *Anesthesia and analgesia* 2004; **98**(6): 1552-6, table of contents.
383. Yoshimizu M, Teo AR, Ando M, Kiyohara K, Kawamura T. Relief of chronic shoulder and neck pain by electro-acupuncture and transcutaneous electrical nervous stimulation: A randomized crossover trial. *Medical Acupuncture* 2012; **24**(2): 97-103.
384. Yüksel M, Ayaş Ş, Cabioglu MT, Yilmaz D, Cabioglu C. Quantitative Data for Transcutaneous Electrical Nerve Stimulation and Acupuncture Effectiveness in Treatment of Fibromyalgia Syndrome. *Evidence-based Complementary and Alternative Medicine* 2019; **2019**.
385. Yurtkuran M, Kocagil T. TENS, electroacupuncture and ice massage: comparison of treatment for osteoarthritis of the knee. *American journal of acupuncture* 1999; **27**(3-4): 133-40.
386. Zakariaee SS, Shahoei R, Nosab LH, Moradi G, Farshbaf M. The Effects of Transcutaneous Electrical Nerve Stimulation on Post-Episiotomy Pain Severity in Primiparous Women: A Randomized, Controlled, Placebo Clinical Trial. *Galen Medical Journal* 2019; **8**: UNSP e1404.
387. Zhang Y, Zhang J, Wang L, Wang K, Svensson P. Effect of transcutaneous electrical nerve stimulation on jaw movement-evoked pain in patients with TMJ disc displacement without reduction and healthy controls. *Acta Odontologica Scandinavica* 2020; **78**(4): 309-20.
388. Zhou MM, Li F, Lu WB, Wu JF, Pei S. Efficiency of Neuromuscular Electrical Stimulation and Transcutaneous Nerve Stimulation on Hemiplegic Shoulder Pain: A Randomized Controlled Trial. *Archives of physical medicine and rehabilitation* 2018; **99**(9): 1730-9.
