# Supplementary figures and images for: Efficacy and safety of transcutaneous electrical nerve stimulation (TENS) for acute and chronic pain in adults: a systematic review and meta-analysis of 381 studies (the meta-TENS study)
Source: PubMed Central journal article supplement — BMJ Open. 2022 Feb 10;12(2):e051073. doi: 10.1136/bmjopen-2021-051073 (PMC8845179; doi:10.1136/bmjopen-2021-051073), 2022-02-10

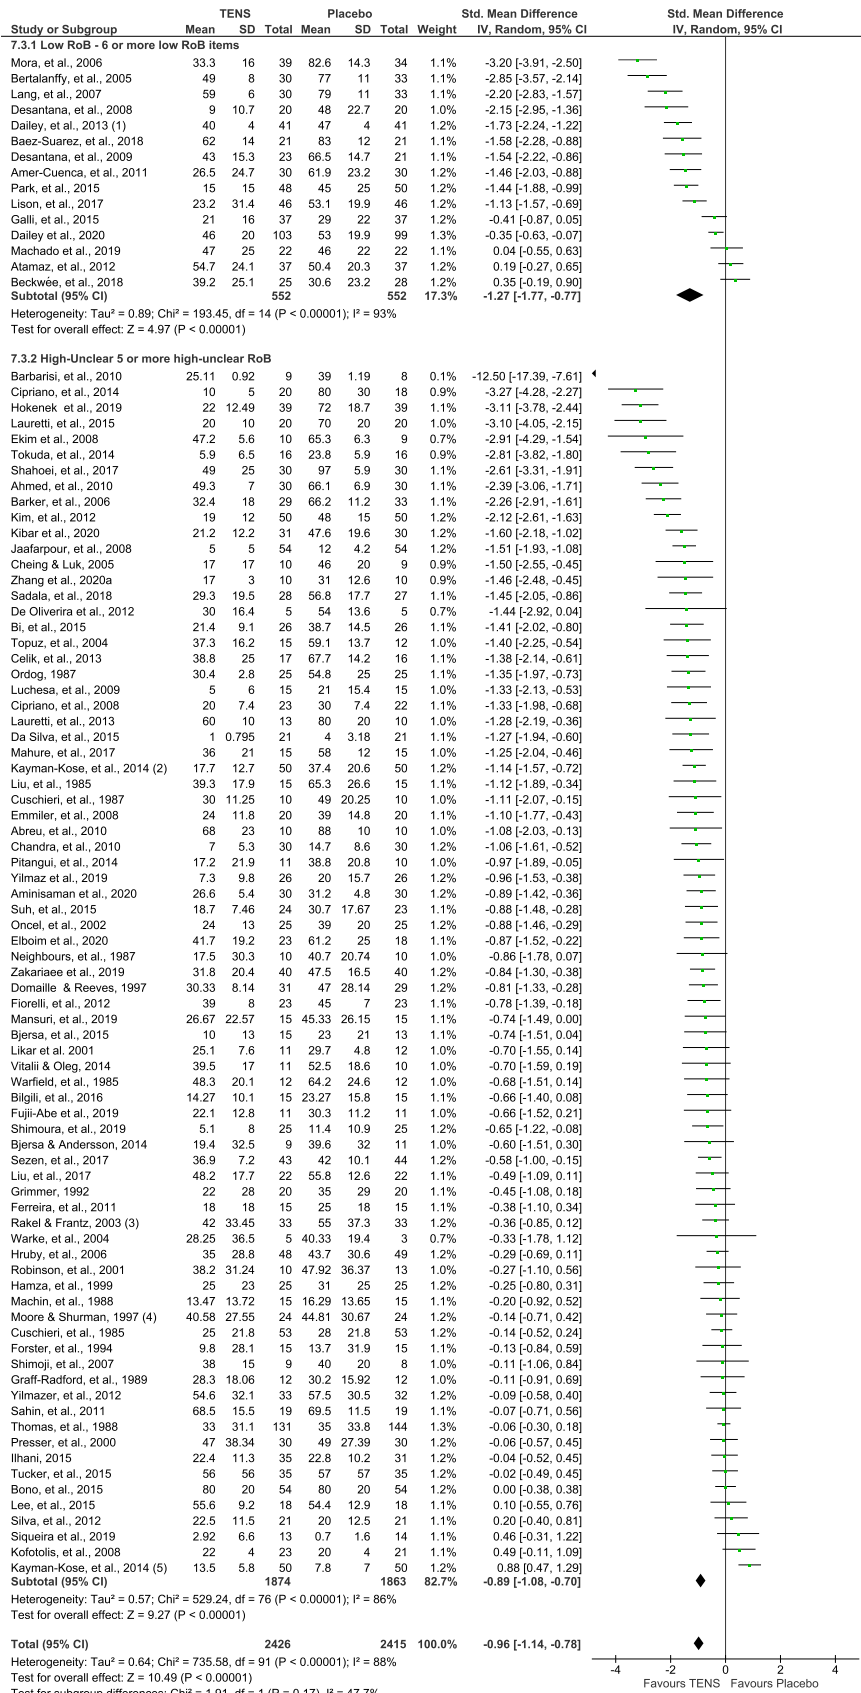

Supplement: bmjopen-2021-051073supp005.pdf [file bmjopen-2021-051073supp005.pdf]
